# Supplementary material for: Analysis of pir gene expression across the Plasmodium life cycle
Source: PubMed Central journal article supplement (PMC8614022; doi:10.1186/s12936-021-03979-6), 2021-11-25
Supplement: 12936_2021_3979_MOESM10_ESM.pdf [file 12936_2021_3979_MOESM10_ESM.pdf]

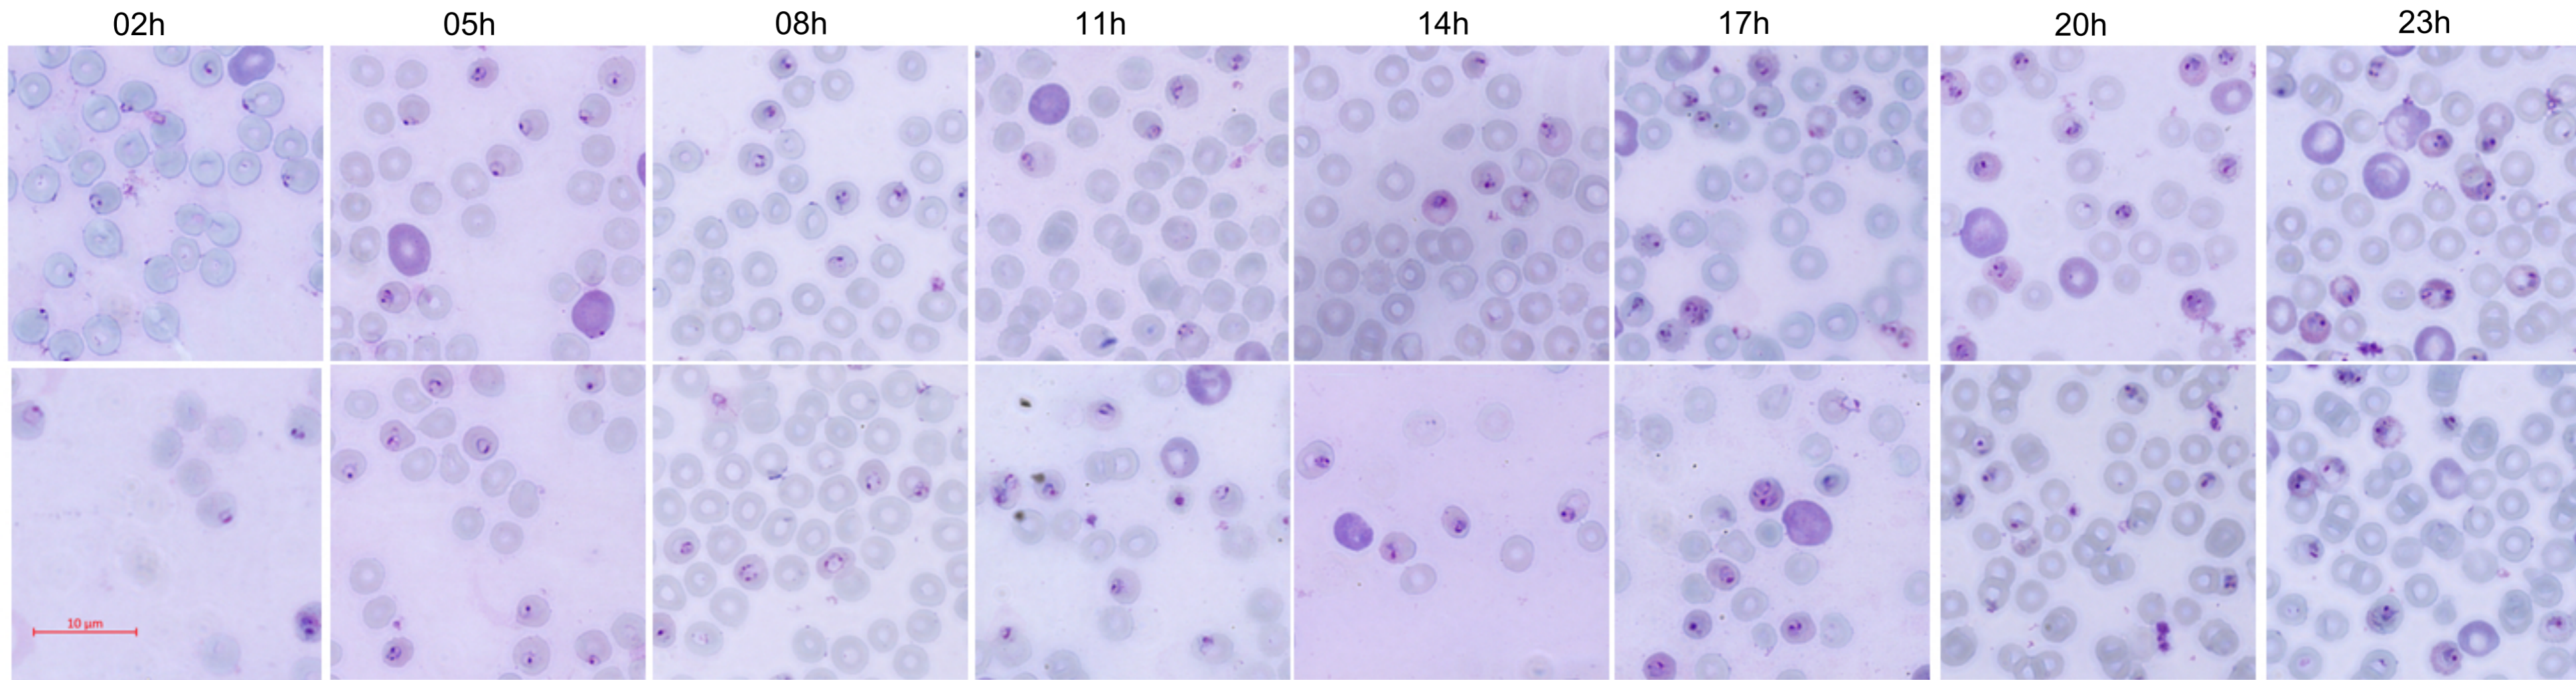

Supplementary Figure 3
