# Supplementary material for: Analysis of pir gene expression across the Plasmodium life cycle
Source: PubMed Central journal article supplement (PMC8614022; doi:10.1186/s12936-021-03979-6), 2021-11-25
Supplement: 12936_2021_3979_MOESM15_ESM.pdf [file 12936_2021_3979_MOESM15_ESM.pdf]

|         |                                                       |    |
|---------|-------------------------------------------------------|----|
| PCHAS   | -----MEEEEKYEYLPAYEFYSKLNENVAEE-----                  | 26 |
| PCHCB   | -----MEEEEKYEYLPAYEFYSKLNENVAEE-----                  | 26 |
| PBANKA  | -----MEEERYEHLPSYEFYNKLNENVSDE-----                   | 26 |
| PY17X   | -----MEEERYEHLPSYEFYNKLNENVPDE-----                   | 26 |
| PKNH    | -----MKKDPKYKDLPSQIYYDKLNEDIVQDDEENEPP---EVNEDHGEN    | 42 |
| AK88    | -----MGCYDPRYKDLPSQVYYAKLNEDIVEEEDD---GNEEHVENEYEVN   | 44 |
| PCOAH   | -----MKKDPKYKDLPSQKYDYDKLNEDIVEEEDDEEHEGNEEHEEHDEYGEN | 46 |
| C922    | -MGVHRASTPNSMHWAKDSKYKDLPSQIYYDNLNEDIIEEEDDED-----    | 45 |
| PCYB    | -----MEKDPKYKDLPSYIYYDKLNEDIIEEDDE-----               | 29 |
| PcyM    | -----MEKDPKYKDLPSYIYYDKLNEDIIEEDDE-----               | 29 |
| PVP01   | -----MEKDPKYKDLPSQIYYDKLNEDIIEEEDD-----               | 29 |
| PVX     | -----MEKDPKYKDLPSQIYYDKLNEDIIEEEDD-----               | 29 |
| PVL     | -----MEKDPKYKDLPSQIYYDKLNEDIIEEEDD-----               | 29 |
| PocGH01 | MLQCGKLIHIYLFSSIPQDPKYEHLPSYIFYEQLNSDINEDD-----       | 41 |
| PmUG01  | -----MNNGFYKLDNTYNHLPSYKFYEQLNSDINEDD-----            | 33 |

: \*: \*\*: :\* :\*\*.: : :

|         |                                                             |     |
|---------|-------------------------------------------------------------|-----|
| PCHAS   | -----                                                       | 26  |
| PCHCB   | -----                                                       | 26  |
| PBANKA  | -----                                                       | 26  |
| PY17X   | -----                                                       | 26  |
| PKNH    | EEHEIND-----ELEGNEENE-----EHDEYGENEEH                       | 69  |
| AK88    | EEQEVNEEEV-----                                             | 55  |
| PCOAH   | EENKVNEGNEENVEHEGNEGVEHEENEGNVEHEENEGNVEHEENEGNELNEEYEENELN | 106 |
| C922    | -----                                                       | 45  |
| PCYB    | -----                                                       | 29  |
| PcyM    | -----                                                       | 29  |
| PVP01   | -----                                                       | 29  |
| PVX     | -----                                                       | 29  |
| PVL     | -----                                                       | 29  |
| PocGH01 | -----                                                       | 41  |
| PmUG01  | -----                                                       | 33  |

|         |                                                             |     |
|---------|-------------------------------------------------------------|-----|
| PCHAS   | -----                                                       | 26  |
| PCHCB   | -----                                                       | 26  |
| PBANKA  | -----                                                       | 26  |
| PY17X   | -----                                                       | 26  |
| PKNH    | DEYEENEGNEENEGNEEHEENEHEENEHDE-----YEENEGN---               | 108 |
| AK88    | -----IEEQEVNEEEVIEEQEVNEVQE-----                            | 78  |
| PCOAH   | EEYEENEVNEENEGNEGSEYEENEVNEENEVNEENEVNEENEGSEENEVNEENEGSEEN | 166 |
| C922    | -----                                                       | 45  |
| PCYB    | -----                                                       | 29  |
| PcyM    | -----                                                       | 29  |
| PVP01   | -----                                                       | 29  |
| PVX     | -----                                                       | 29  |
| PVL     | -----                                                       | 29  |
| PocGH01 | -----                                                       | 41  |
| PmUG01  | -----                                                       | 33  |

|        |                                                                 |     |
|--------|-----------------------------------------------------------------|-----|
| PCHAS  | -----DKEKPNKYW                                                  | 35  |
| PCHCB  | -----DKEKPNKYW                                                  | 35  |
| PBANKA | -----DKEKPNKYW                                                  | 35  |
| PY17X  | -----DKEKPNKYW                                                  | 35  |
| PKNH   | -----EEHDEYEENEGNEEHDEYEE---NEEYAEHGRNDELEVNGKNGSAKNVYW         | 156 |
| AK88   | -----VNEEQEVNEEQEVNEVQEVN---KVEQVNKEHGVNGQSKGIEENVYW            | 122 |
| PCOAH  | EVNEENEGSEENEVNEENEGSEENEVNEENEVNEENEGNEGNEQHEVNEVNEGSKGSEKNVYW | 226 |
| C922   | -----ENDGNDENESESESEENVYW                                       | 65  |
| PCYB   | -----NEETVENESESESEENVYW                                        | 48  |

|         |                         |    |
|---------|-------------------------|----|
| PcyM    | -----NEETVENESESEENVY   | 48 |
| PVP01   | -----E-----HEENEESQENVY | 43 |
| PVX     | -----E-----HEENEESQENVY | 43 |
| PVL     | -----E-----HEENEESQENVY | 43 |
| PocGH01 | -----EEVSEYW            | 48 |
| PmUG01  | -----NE-SVY             | 39 |

. \*\*

|         |                                                               |     |
|---------|---------------------------------------------------------------|-----|
| PCHAS   | KRIEPIFEPSEVRDIVYKLQRNVTLLENRGEQDLYVKHCYDLNYWLYEQVYKSFNLNE    | 95  |
| PCHCB   | KRIEPIFEPSEVRDIVYKLQRNVTLLENRGEQDLYVKHCYDLNYWLYEQVYKSFNLNE    | 95  |
| PBANKA  | KRIEPIFEPSEWVREIVYKLHRNVTFLENENRDDDKLYGKHCYDLNYWLYEQVYKNSDLND | 95  |
| PY17X   | KRIEPIFEPSEWVREIVYKLQRNVTFLENENRDGDKLYGKHCYDLNYWLYEQVYKNSGLND | 95  |
| PKNH    | EAMKGSYEQTPWVRDVFFKLERNITELNGNSSEDILRKKHCYDLNYWLYEQVYENLNKNE  | 216 |
| AK88    | KAVQGSYEETPWVRDVFFKLERNLTQLNEGREEDSLSKKHCYDLNYWLYEQVYENLNKNE  | 182 |
| PCOAH   | EGMKGSYEETPWVRDVFFKLDRNLTEVNENRGEQDLYVKHCYDLNYWLYEQVYENLNKNE  | 286 |
| C922    | EAIEGSYEQTPWVRDVFFKLERNLTELNESREKDSLSKKHCYDLNYWLYEQVYENLNKNE  | 125 |
| PCYB    | EAIEGSYEQTPWVRDVFFKLERNLTELNESRDEDSLSKKHCYDLNYWLYEQVYENLNNE   | 108 |
| PcyM    | EAIEGSYEQTPWVRDVFFKLERNLTELNESRDEDSLSKKHCYDLNYWLYEQVYENLNNE   | 108 |
| PVP01   | EAIEGSYEQTPWVRDVFFKLERNLTELNESRGEQDLYVKHCYDLNYWLYEQVYENLNNE   | 103 |
| PVX     | EAIEGSYEQTPWVRDVFFKLERNLTELNESRGEQDLYVKHCYDLNYWLYEQVYENLNNE   | 103 |
| PVL     | EAIEGSYEQTPWVRD-----                                          | 58  |
| PocGH01 | DAIEPSFDRTPWVRDVFFKLERNLTMINENRAEDNFSKKHCYDLNFWLYEQVYKNFESNE  | 108 |
| PmUG01  | DSVEPSFDKTLWARDVFLKLERNVLSVNRNRIEDVFSKKHCYDLNYWLYEQVYKNFDHNE  | 99  |

. :: : : .\*\*:

|         |                                                               |     |
|---------|---------------------------------------------------------------|-----|
| PCHAS   | NSIHFFMTLDILLNSWENMNADQFNGEKDICQPDNTLIDINYLKEIKYLGDYVENFDTIK  | 155 |
| PCHCB   | NSIHFFMTLDILLNSWENMNADQFNGEKDICQPDNTLIDINYLKEIKYLGDYVENFDTIK  | 155 |
| PBANKA  | NLSFFITLDILLNSWENMNADKFNNGKDICQPDNTLVDINYLKEIKYLADYVENFETIK   | 155 |
| PY17X   | NLSFFITLDILLNSWENMNADKFNNGKDICQPDNTLVDINYLKEIKYLADYVENFETIK   | 155 |
| PKNH    | NDENFFKIIDDLOGAWKNINNDKFPNADNICHDPDKTLVDMKYLEVDKDLFDLIEDHSTIK | 276 |
| AK88    | NDENFFKIIDGLOGAWKNINNDKFPNADNICHDPDTTLVDMKYLKDVKYLFDLVEDYSTIK | 242 |
| PCOAH   | NDENFFKIIDDLOGAWKNINNDKFPNADNICHDPDKTLVDMKYLEVDKHLFDLIEDYSTIK | 346 |
| C922    | NDENFFKIIDGLOGAWKNINNDKFPNADNICHDPDKTLVDMKYLKDVKNLFDLIEDFSTIK | 185 |
| PCYB    | NDENFFKIIDGLOGAWKNINNDKFPNADNICHDPDKTLVDMKYLKDVKHLFDLIEDFSTIK | 168 |
| PcyM    | NDENFFKIIDGLOGAWKNINNDKFPNADNICHDPDKTLVDMKYLKDVKHLFDLIEDFSTIK | 168 |
| PVP01   | NDENFFKIIDGLOGAWKNINNDKFPNADNICHDPDKTLVDMKYLKDVKHLFDLIEDFSTIK | 163 |
| PVX     | NDENFFKIIDGLOGAWKNINNDKFPNADNICHDPDKTLVDMKYLKDVKHLFDLIEDFSTIK | 163 |
| PVL     | -----FPNADNICHDPDKTLVDMKYLKDVKHLFDLIEDFSTIK                   | 95  |
| PocGH01 | NDENFYKTLDLLIEAWTNINNDKFPNADNICHDPDTLVDMEYLKEIKYLFDFIEDFIIK   | 168 |
| PmUG01  | KDENFYKTIDIFQDGWKRINNSEFPNEDNVCHPDHTLVDMEYLKDVKNLFDLIEDYVIK   | 159 |

\* . .:::\*\* \*\*:::\*\*::\*\* \* \* \*::. \*\*

|         |                                                               |     |
|---------|---------------------------------------------------------------|-----|
| PCHAS   | SAAIEDTNKACNVYIDYLRYAIPAYYEWNKLCLEENLCNKYIHDYKYPKGVLSNLS      | 215 |
| PCHCB   | SAAIEDTNKACNVYIDYLRYAIPAYYEWNKLCLEENLCNKYIHDYKYPKGVLSNLS      | 215 |
| PBANKA  | SAAIEDTNKACNAYIDYLRYAIPAYYEWNTVCTIEEENICNKYIRDYKYNPKGVLCNLS   | 215 |
| PY17X   | SAAIEDTNKACNVYIDYLRYAIPAYYEWNTVCTIDEENLCNKYIRDYKYNPKGVLCNLS   | 215 |
| PKNH    | AAAINDTKNACLKYIDYLKIKVPLYEYEWNNICTMEEENICTKYIDDYSKYDPKNVLENLS | 336 |
| AK88    | AAAINDTKNACQKYIDYLKVKVPLYEYEWKDVCTMEEENICTKYIDDFSQYNPKSVLENLS | 302 |
| PCOAH   | EAAINDTKNACQKYIDYLKITVPLYEYEWNGICTMEEQNICTKYIDDYSKYDPKNVMENLS | 406 |
| C922    | TAAIKDTNRACQKYIDYLKLVPLYEYEWNSVCTMEEENICTKYIDDYPKYNPKNVLENLS  | 245 |
| PCYB    | TAAIKDTNACQKYIDYLKLVPLYEYEWNDVCTMEEENICTRYIDDYPKYNPKNVLENLS   | 228 |
| PcyM    | TAAIKDTNACQKYIDYLKLVPLYEYEWNDVCTMEEENICTRYIDDYPKYNPKNVLENLS   | 228 |
| PVP01   | TAAIKDTNACQKYIDYLKLVPLYEYEWNDVCTMEEENICTKYIDDYPKYNPKNVLENLS   | 223 |
| PVX     | TAAIKDTNACQKYIDYLKLVPLYEYEWNDVCTMEEENICTKYIDDYPKYNPKNVLENLS   | 223 |
| PVL     | TAAIKDTNACQKYIDYLKLVPLYEYEWNDVCTMEEENICTKYIDDYPKYNPKDVLENLS   | 155 |
| PocGH01 | TAAIKDTNACQKYIDYLKLVPLYEYEWKDLCTMEGDNICTRYIDDYVKNPKNVLENLS    | 228 |
| PmUG01  | AEVIRDTNACQKYIEYLKQKVPLYEYEWENVCTVEEDNICTRYIDDYTKYNPRNVLENLS  | 219 |

.\*.\*\*\*:.\*\* \*::\*\* : \* \*\*\*\*: :\*\*\*: :\*:\*.\*\* \* : ::\*:.\*: \*\*\*

|        |                                                              |     |
|--------|--------------------------------------------------------------|-----|
| PCHAS  | VTGLAFAQLFNKCYKNIVSIFLSTNNASERTTIKLRNGLETISYGITESQGRSLSEVGIP | 275 |
| PCHCB  | VTGLAFAQLFNKCYKNIVSIFLSTNNASERTTIKLRNGLETISYGITESQGRSLSEVGIP | 275 |
| PBANKA | VTGLAVAQLFNQCYKSIVNIFMNVNAPVVRTTIKLRNGLETISYGITENKGRSLYEVETA | 275 |
| PY17X  | VTGLAFAQLFNQCYKSIVNIFINVNAPVVRTTIKLRNGLETISYGITENKGRSLYEVETA | 275 |
| PKNH   | VVSLALASIFNDCYQNIINLFTAEKIEPRTVLKQRGITGESENNVKTGGRILAEHVSD   | 396 |
| AK88   | VVSLALASIFNDCYQNIINLFTAEKIEPRTVLKHRDITGQSESNIVKVGGRVLSEAILD  | 362 |

|         |                                                               |     |
|---------|---------------------------------------------------------------|-----|
| PCOAH   | VVSLALASIFNDCYQNIINLFTAEKIEPRTVLKNRDITGQSENNAIKMGGRILAAAVGD   | 466 |
| C922    | VVSLALSSIFNDCYQDIINLFTKAEKIEPRTVLKVRDITGTSQSNVVKMGGRVLAEAIND  | 305 |
| PCYB    | VVSLALASIFNDCYQNIINLFTAEKIEPRTVLKHRGITGPSESNVVKIGGRALAEAISD   | 288 |
| PcyM    | VVSLALASIFNDCYQNIINLFTAEKIEPRTVLKHRGITGPSESNVVKIGGRALAEAISD   | 288 |
| PVP01   | VVSLALASIFNDCYQNIINLFTAEKIEPRTVLKHRDITGPSESNVVKIGGRALAEAISD   | 283 |
| PVX     | VVSLALASIFNDCYQNIINLFTAEKIEPRTVLKHRDITGPSESNVVKIGGRALAEAISD   | 283 |
| PVL     | VVSLALASIFNDCYQNIINLFTAEKIEPRTVLKHRDITGPSESNVVKIGGRALAEAISD   | 215 |
| PocGH01 | VVGLALASIFNDCYQNVINLFTAEKLPARTLLKHRNSVGKLESTIIKT-GRALAESGSD   | 287 |
| PmUG01  | VVGLSLASVFNDCYQNIITVFQESEKLPSTRTELKQRNALGQIESTVVKV-GRTLAEIGDD | 278 |

\*. . . \* : : : : \* : : : : \* . : : \* \* : \* \* . . : \* \* \*

|         |                                                              |     |
|---------|--------------------------------------------------------------|-----|
| PCHAS   | IEEKSDFFSPIIYFFNSIYSTISEIYINSYNDIILLIVLFSGILITFFGVNKITKIIKST | 335 |
| PCHCB   | IEEKSDFFSPIIYFFNSIYSTISEIYINSYNDIILLIVLFSGILITFFGVNKITKIIKST | 335 |
| PBANKA  | IEEPTDLLAYVIYILKSLYNTISEIYINNYNDIILLIVLFSGILVTCFGVHKITKIVKST | 335 |
| PY17X   | IQEPADFLAYLIYILKSVYNTISEIYINNYNDIILLIVLFSGILITCFGVYKISKIVKST | 335 |
| PKNH    | TSESANMLTGVNTLATSFPFMTKRISPCVFNQVLLVISFLSLLLFLVHSIYKFILIGKYI | 456 |
| AK88    | IPESGNALVGINALATSFFSMFKRFNSYIYSMFAPVGLSLLSIVLFMYVVKFTPIGKTI  | 422 |
| PCOAH   | TYESGNRLIGINALGTSIFSMVKRFSSYVFSLIAPVGISLLCLLFFLYVLNKFTSIGKYI | 526 |
| C922    | TSQSGNILIGINALVTSLSVVKRFNSYVFSLVAPVGVSLLSLFLFLCVLYKFTPIGKSI  | 365 |
| PCYB    | TPQSGNMLIGINALATSLSVVKRFNSYVFNLVAPVGLSLLSLLLFLYVLYKFTPIGKSI  | 348 |
| PcyM    | TPQSGNMLIGINALATSLSVVKRFNSYVFNLVAPVGLSLLSLLLFLYVLYKFTPIGKSI  | 348 |
| PVP01   | TSQSGNMLIGINALATSLSVVKRFNSYVFSLVAPVGLSLLGLLLFLYVLYKFTPIGKSI  | 343 |
| PVX     | TSQSGNMLIGINALATSLSVVKRFNSYVFSLVAPVGLSLLGLLLFLYVLYKFTPIGKSI  | 343 |
| PVL     | TSQSGNMLIGINALATSLSVVKRFNSYVFSLVAPVGLSLLGLLLFLYVLYKVKRMSG-   | 274 |
| PocGH01 | PMPSGSIFVGINAFVSSLFSVMKGFNSYVFNLVTPVSLLLGILMLFYILYKFSSLRQSI  | 347 |
| PmUG01  | GMQSGDIFIGVNDVFVYSIYAVKRLNSYVFDHFTTMNILLVILMALFIFCKFISGRSMS  | 338 |

. : : \* . : : . . : : : : : . \* . .

|         |                                                          |     |
|---------|----------------------------------------------------------|-----|
| PCHAS   | SNEQNRNQNTREEISL-----                                    | 351 |
| PCHCB   | SNEQNRNQNTREEISL-----                                    | 351 |
| PBANKA  | SSVQNRNQNTQAEISL-----                                    | 351 |
| PY17X   | SNVQNRNQNTQAEIPL-----                                    | 351 |
| PKNH    | FDTYKGVENKCTRCKSDDSEDEEEEEEEEEDEDDDE-----EEEGDEEDEDDEDD  | 509 |
| AK88    | YLNQKGMKNHYVRKNSDDSDDEDDDDDDDDNDNSANISH-----KNKKNNRGNRDN | 476 |
| PCOAH   | SYTHKGVQNKCLRNKSDDEEDEDDEDDDEDDDDDDDDDDYDYIDEDDEDEDDEDD  | 586 |
| C922    | YHPHKRGKNI FVRNKTDLDDEDDDDEN-----S                       | 395 |
| PCYB    | NLTHKRVKNKFVGNRSDDFDDDEDDDD-----                         | 376 |
| PcyM    | NLTHKRVKNKFVGNRSDDFDDDEDDDD-----                         | 376 |
| PVP01   | SRTHKRVKNKFVNRKRDDFDDDEDDDD-D-----                       | 370 |
| PVX     | SRTHKRVKNKFVNRKRDDFDDDEDDDD-D-----                       | 370 |
| PVL     | -----                                                    | 274 |
| PocGH01 | YRTHKKIKNKFGRNKGKDEIGPLSDCSGSLDSHS-----                  | 381 |
| PmUG01  | CNDSKXXX-----                                            | 346 |

|         |                         |     |
|---------|-------------------------|-----|
| PCHAS   | -----                   | 351 |
| PCHCB   | -----                   | 351 |
| PBANKA  | -----                   | 351 |
| PY17X   | -----                   | 351 |
| PKNH    | DDSDSNSALKSSFRKWSLNSHS  | 532 |
| AK88    | DNNRDNNKDNNSSNVE-----   | 492 |
| PCOAH   | EDDSNNSGLKSSSSEEPNSHS   | 609 |
| C922    | DNNTDNNSDFKSSPSIESLNSHS | 418 |
| PCYB    | -DDSDNNSDLKSSSSMESLNSHS | 398 |
| PcyM    | -DDSDNNSDLKSSSSMESLNSHS | 398 |
| PVP01   | -DDSDNNSDLKSSSSMESLLNS  | 392 |
| PVX     | -DDSDNNSDLKSSSSMESLLNS  | 392 |
| PVL     | -----                   | 274 |
| PocGH01 | -----                   | 381 |
| PmUG01  | -----                   | 346 |
