# Supplementary material for: Analysis of pir gene expression across the Plasmodium life cycle
Source: Springer Nature journal article supplement (doi:10.1186/s12936-021-03979-6), 2021-11-25

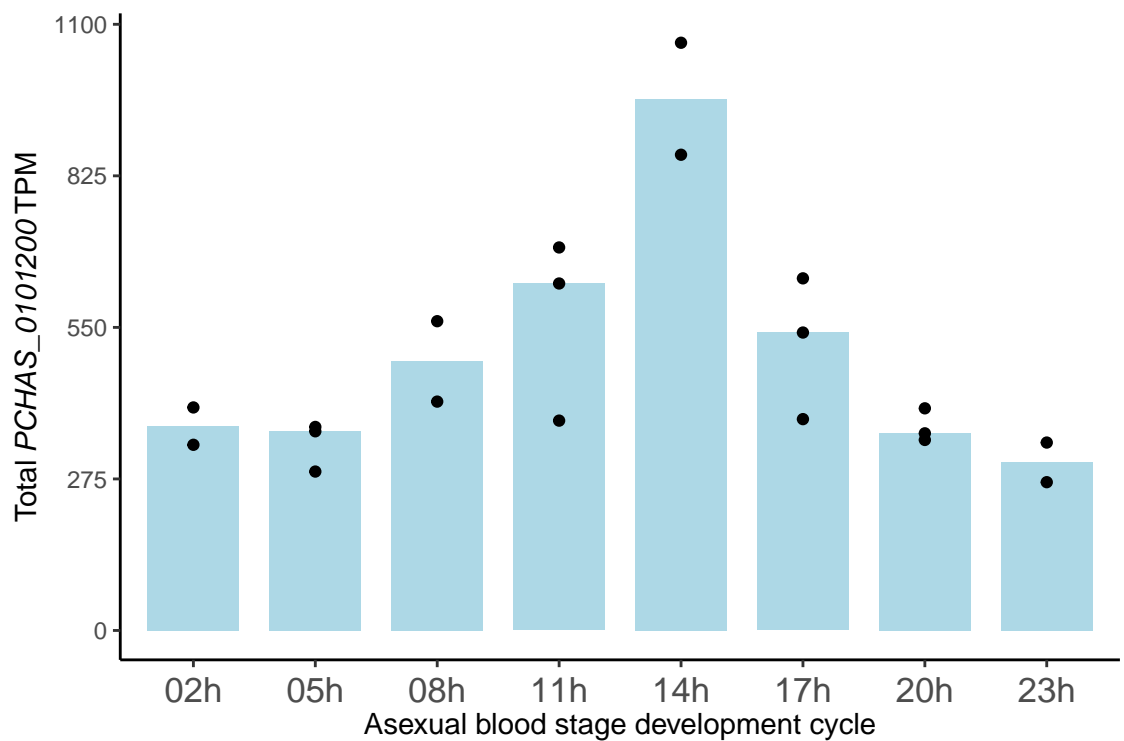

Supplement: MOESM13 [file 19900994]
