# Supplementary material for: Analysis of pir gene expression across the Plasmodium life cycle
Source: Malar J. 2021 Nov 25;20:445. doi: 10.1186/s12936-021-03979-6 (PMC8614022; doi:10.1186/s12936-021-03979-6)
Supplement: Supplementary file 3 — Additional file 3. Statistics of P. berghei pirgene set comparisons (QUSage). [file 12936_2021_3979_MOESM3_ESM.xlsx]

## Sheet: Sheet1
contrast	pathway.name	log.fold.change	p.Value	FDR
Asex.Mixed-Liv.Meroz	L	0.0707492	0.904022	0.961475
Asex.Mixed-Liv.Meroz	L1	0.0104192	0.979345	0.979345
Asex.Mixed-Liv.Meroz	L2	1.195	0.0987432	0.277347
Asex.Mixed-Liv.Meroz	L3	-1.20704	0.175728	0.387978
Asex.Mixed-Liv.Meroz	pirs	0.35398	0.641423	0.76557
Asex.Mixed-Liv.Meroz	S	0.465848	0.583714	0.742949
Asex.Mixed-Liv.Meroz	S1	0.572102	0.469846	0.643863
Asex.Mixed-Liv.Meroz	S2	-0.816692	0.356198	0.549139
Asex.Mixed-Liv.Meroz	S4	0.0553142	0.944953	0.971201
Asex.Mixed-Liv.Meroz	S8	1.9421	0.0139447	0.0515955
Gam.Male-Asex.Mixed	L	-0.72292	0.0278061	0.0935295
Gam.Male-Asex.Mixed	L1	-0.469162	0.21386	0.439601
Gam.Male-Asex.Mixed	L2	-1.25504	0.000301672	0.00372063
Gam.Male-Asex.Mixed	L3	-0.943875	0.00226356	0.020938
Gam.Male-Asex.Mixed	pirs	0.0471107	0.899159	0.961475
Gam.Male-Asex.Mixed	S	0.24261	0.549058	0.725541
Gam.Male-Asex.Mixed	S1	0.39345	0.339501	0.546154
Gam.Male-Asex.Mixed	S2	-0.500839	0.30841	0.51869
Gam.Male-Asex.Mixed	S4	0.614889	0.130768	0.322562
Gam.Male-Asex.Mixed	S8	-1.85037	0.00316819	0.0234446
Gam.Male-Gam.Female	pirs	1.97233	6.50059e-07	1.20261e-05
Gam.Male-Liv.Meroz	L	-0.652171	0.234637	0.456925
Gam.Male-Liv.Meroz	L1	-0.458743	0.304644	0.51869
Gam.Male-Liv.Meroz	L2	-0.0600438	0.909503	0.961475
Gam.Male-Liv.Meroz	L3	-2.15091	0.0459991	0.141831
Gam.Male-Liv.Meroz	pirs	0.401091	0.602391	0.742949
Gam.Male-Liv.Meroz	S	0.708458	0.415585	0.607589
Gam.Male-Liv.Meroz	S1	0.965552	0.249375	0.461344
Gam.Male-Liv.Meroz	S2	-1.31753	0.17826	0.387978
Gam.Male-Liv.Meroz	S4	0.670203	0.426954	0.607589
Gam.Male-Liv.Meroz	S8	0.0917264	0.885735	0.961475
Liv.Meroz-Liv.post48h	L	1.80861	0.0109644	0.045076
Liv.Meroz-Liv.post48h	pirs	2.55169	0.00525463	0.0277745
Liv.Meroz-Liv.post48h	S	2.70287	0.00697506	0.0322596
Liv.post48h-Liv.24h	L	1.55645	3.94573e-11	1.45992e-09
Liv.post48h-Liv.24h	pirs	0.674205	0.00411623	0.0253834
Liv.post48h-Liv.24h	S	0.398519	0.104942	0.277347
