# Supplementary material for: Analysis of pir gene expression across the Plasmodium life cycle
Source: Malar J. 2021 Nov 25;20:445. doi: 10.1186/s12936-021-03979-6 (PMC8614022; doi:10.1186/s12936-021-03979-6)
Supplement: Supplementary file 5 — Additional file 5. P. c. chabaudi counts across the 24 hour asexual developmental cycle. [file 12936_2021_3979_MOESM5_ESM.xlsx]

## Sheet: Sheet1
Geneid	rMT_02h_Late.Rings_1	rMT_02h_Late.Rings_2	rMT_05h_Rings.Troph.conversion_1	rMT_05h_Rings.Troph.conversion_2	rMT_05h_Rings.Troph.conversion_3	rMT_08h_Early.Trophs_1	rMT_08h_Early.Trophs_2	rMT_11h_Mid.Trophs_1	rMT_11h_Mid.Trophs_2	rMT_11h_Mid.Trophs_3	rMT_14h_Late.Trophs_1	rMT_14h_Late.Trophs_2	rMT_17h_Early.Rings_1	rMT_17h_Early.Rings_2	rMT_17h_Early.Rings_3	rMT_20h_Early.Mid.Rings_1	rMT_20h_Early.Mid.Rings_2	rMT_20h_Early.Mid.Rings_3	rMT_23h_Late.Mid.Rings_1	rMT_23h_Late.Mid.Rings_2	SBP_02h_Late.Rings_1	SBP_02h_Late.Rings_2	SBP_02h_Late.Rings_3	SBP_05h_Rings.Troph.conversion_1	SBP_05h_Rings.Troph.conversion_2	SBP_05h_Rings.Troph.conversion_3	SBP_08h_Early.Trophs_1	SBP_08h_Early.Trophs_2	SBP_08h_Early.Trophs_3	SBP_11h_Mid.Trophs_1	SBP_11h_Mid.Trophs_2	SBP_11h_Mid.Trophs_3	SBP_14h_Late.Trophs_1	SBP_14h_Late.Trophs_2	SBP_14h_Late.Trophs_3	SBP_17h_Early.Rings_1	SBP_17h_Early.Rings_2	SBP_17h_Early.Rings_3	SBP_20h_Early.Mid.Rings_1	SBP_20h_Early.Mid.Rings_2	SBP_20h_Early.Mid.Rings_3	SBP_23h_Late.Mid.Rings_1	SBP_23h_Late.Mid.Rings_2	SBP_23h_Late.Mid.Rings_3
PCHAS_0100100	308	361	280	419	218	112	114	108	121	105	146	3063	1669	54	1829	776	709	478	292	348	1734	2014	1511	1026	891	1092	843	701	576	549	597	472	450	319	546	14500	10025	10576	4699	4023	5479	3354	6418	3201
PCHAS_0100200	3	2	1	0	2	0	1	12	12	3	6	19	2	1	2	4	5	4	1	1	24	9	14	8	11	15	72	30	12	192	387	103	197	195	343	188	282	147	23	18	29	15	29	13
PCHAS_0100300	0	0	0	0	0	0	1	2	1	0	1	1	0	0	0	0	0	0	0	1	1	1	0	0	0	1	3	1	1	3	9	2	15	6	24	7	12	14	1	0	0	3	5	3
PCHAS_0100400	11	10	6	7	10	12	20	25	31	12	9	18	0	1	6	1	4	2	3	10	39	28	33	50	81	112	263	167	80	396	637	255	296	320	511	198	329	175	14	17	27	33	56	36
PCHAS_0100500	274	233	208	309	149	87	51	147	69	72	432	11162	9913	106	6540	2846	2364	1921	526	427	265	220	176	80	66	62	36	62	31	52	135	45	82	103	116	1338	1276	1437	870	667	910	610	1121	445
PCHAS_0100600	17	27	10	11	8	14	8	26	46	5	14	70	6	3	17	13	18	10	3	10	4	8	5	11	6	16	24	12	7	24	51	16	72	50	100	90	120	55	10	7	16	16	13	11
PCHAS_0100651	5	4	8	9	1	3	1	5	2	2	3	2	1	0	0	11	5	2	5	4	8	4	3	14	9	17	23	18	12	13	29	11	6	8	5	10	12	7	0	1	3	1	5	4
PCHAS_0100700	64	27	101	109	34	12	6	13	22	8	14	334	208	1	76	122	57	23	41	36	1855	1957	1702	1016	1071	1545	913	802	732	617	641	488	200	154	315	4247	3022	3071	2339	1754	3084	2594	4460	2733
PCHAS_0100800	8	12	14	23	8	11	4	10	18	3	4	31	6	0	5	15	8	1	6	9	42	59	40	56	53	87	85	62	49	86	132	59	49	37	67	239	188	146	100	102	132	37	131	63
PCHAS_0100900	1081	1290	1652	1521	1053	638	620	549	823	470	217	2017	634	41	1055	1052	875	384	814	982	3102	2421	2305	2197	2827	4440	4149	3401	2334	3647	4058	2662	1084	1266	1710	13509	8923	7550	2239	2701	4108	2827	5439	3444
PCHAS_0101000	332	382	485	486	331	227	181	239	278	107	87	359	202	7	188	322	201	82	208	300	556	811	742	885	1115	1058	1215	946	545	1463	1011	732	549	638	865	991	1314	928	591	386	974	1308	839	915
PCHAS_0101100	9	6	2	6	2	4	0	2	3	0	11	471	67	7	118	29	16	16	2	7	104	56	83	41	43	32	26	30	18	23	46	23	259	66	292	7009	3957	3341	514	635	921	207	551	222
PCHAS_0101200	1830	1953	2209	2356	1635	1826	1386	2452	3382	1017	1463	6117	1488	55	1839	1894	1530	616	1092	1534	6440	7741	6645	5289	6246	8642	8404	6449	4443	8894	18324	6418	11100	10719	15159	22043	21457	15876	7552	5992	11934	10467	12509	9743
PCHAS_0101300	2486	3161	2629	2794	2296	5754	6117	9685	10993	6821	6253	16221	935	123	3520	1505	1809	596	1091	1978	6060	4184	3329	3753	5434	10069	10701	8223	5063	15357	65032	14654	51585	47427	71424	42591	59102	31654	3931	4193	6743	4915	12178	5755
PCHAS_0101400	37685	57747	75055	62487	39468	20962	22483	15417	19627	16628	7145	49745	48329	1442	50201	63529	60178	27386	51387	48505	179923	163681	127509	116380	166092	199353	153423	153331	104828	112261	105197	86269	24320	40676	35943	158607	148835	147595	93350	75217	152170	208816	294151	204329
PCHAS_0101500	251	238	229	178	130	104	73	147	161	43	59	217	91	14	148	314	310	142	124	126	221	445	295	566	528	574	484	355	229	724	548	423	582	589	688	788	949	560	210	189	283	382	331	204
PCHAS_0101600	622	729	1041	1055	539	254	212	320	410	117	104	629	640	13	574	985	756	360	623	599	1529	2811	2685	2702	2957	2316	2026	1723	1371	2017	1038	1042	586	683	822	1537	1874	1562	1736	1171	2792	4745	2349	3111
PCHAS_0101700	678	857	1268	1080	707	376	302	254	385	216	98	206	151	5	280	584	471	177	599	724	1981	2138	1692	1744	2300	3782	3389	2701	1942	2621	1794	1788	322	468	598	387	589	319	479	280	865	1739	2133	2083
PCHAS_0101800	2	1	2	3	2	2	1	4	4	1	1	8	0	0	3	1	1	1	1	1	1	6	2	1	3	3	1	1	3	4	26	4	21	23	26	30	29	17	1	3	7	2	8	3
PCHAS_0101900	652	814	1081	1015	681	403	376	456	626	189	140	279	56	5	148	317	294	117	440	594	648	817	652	1524	2133	1933	2014	1745	1089	2352	1327	1238	716	785	1072	669	1039	509	64	56	153	536	385	632
PCHAS_0102000	335	350	570	483	294	206	187	210	284	122	84	151	23	2	62	144	127	37	195	290	661	490	423	681	1067	1505	1640	1302	778	1733	1550	1144	432	462	702	450	671	332	52	46	120	296	500	486
PCHAS_0102100	1003	1038	1576	1397	892	580	428	800	1121	224	312	927	222	17	364	679	555	200	622	800	1494	2326	2197	3236	4043	3382	3287	2849	1970	4205	3063	2126	2309	2376	3027	2952	3972	1728	741	503	1342	2909	1750	2236
PCHAS_0102200	59	75	61	56	29	19	11	8	26	6	13	75	58	8	111	181	140	103	45	27	157	253	202	172	175	266	219	171	100	170	117	132	24	32	52	96	83	84	177	124	273	267	357	266
PCHAS_0102300	106	128	196	197	90	46	52	43	49	25	11	113	127	1	106	158	144	54	68	90	558	746	664	542	605	674	679	514	361	582	383	317	117	126	185	283	391	283	435	336	787	987	895	886
PCHAS_0102400	479	453	861	725	420	256	134	367	592	79	222	840	366	10	285	570	343	146	340	353	1021	2134	1667	1770	2079	1675	1610	1317	957	2126	1306	1154	1523	1246	2068	1776	2318	1499	1167	888	1660	2856	1536	1846
PCHAS_0102500	402	304	649	524	307	182	103	209	341	72	145	806	291	9	237	508	284	131	266	280	2029	1705	1721	1410	1544	2159	2262	1626	1333	2071	2560	1466	1140	1028	1878	2063	2530	1575	1520	1283	2856	2339	3341	2543
PCHAS_0102600	656	711	1093	993	728	487	450	598	873	286	274	665	106	14	246	429	350	130	413	570	1276	1431	1213	1548	1994	2945	3085	2444	1523	3419	3479	2243	1514	1440	2443	1447	1991	1044	190	136	420	1065	1292	1456
PCHAS_0102700	474	540	815	717	467	261	233	276	399	164	82	172	54	5	91	182	133	42	268	404	760	674	545	1003	1417	1956	2021	1630	1029	2224	1646	1243	430	481	812	499	848	367	147	144	260	526	610	630
PCHAS_0102800	853	840	1500	1218	657	343	259	287	441	189	159	803	808	25	837	1565	1051	422	1059	890	5088	6871	5265	4035	4516	5241	4114	3324	2647	2929	2634	1947	925	863	1416	1748	2285	1447	2869	1557	5039	7762	7478	6910
PCHAS_0102900	400	383	658	608	384	207	142	275	415	96	124	575	345	12	263	522	368	140	293	369	1073	2126	1883	1808	1835	1746	1753	1243	973	1909	1194	976	688	609	951	1627	1930	1486	1451	847	2211	3215	1733	2238
PCHAS_0103000	353	416	302	331	369	518	550	724	1038	442	263	532	52	3	130	87	80	28	51	205	175	135	89	161	229	666	1827	1123	470	3390	5156	2389	1881	1991	2934	1638	2511	1160	115	208	299	119	446	181
PCHAS_0103100	40	47	53	19	18	8	6	21	13	14	9	52	43	3	42	63	47	31	24	17	66	215	133	125	77	83	66	50	32	68	33	49	69	45	89	493	400	196	35	26	121	156	158	32
PCHAS_0103200	207	199	471	296	187	83	59	96	142	35	48	77	15	2	36	92	81	23	120	168	524	411	395	699	1003	1315	1307	1114	693	1318	905	763	287	233	435	400	556	180	43	32	123	326	395	419
PCHAS_0103300	363	392	560	461	328	311	252	459	459	200	285	1425	59	17	286	210	224	94	239	293	522	647	420	613	982	1081	1168	898	624	1113	1936	774	3447	2454	4365	5136	5252	2821	265	418	762	501	598	461
PCHAS_0103400	28	12	11	14	8	1	1	6	3	1	7	30	15	3	19	32	46	12	10	6	35	131	96	74	67	96	29	27	27	32	27	33	61	36	87	116	138	76	4	4	16	45	62	25
PCHAS_0103500	141	156	283	259	132	47	27	55	78	10	18	44	6	2	33	65	55	7	102	117	384	425	469	920	1271	1101	1151	900	626	1048	551	555	158	237	264	256	353	136	58	22	96	380	287	367
PCHAS_0103600	90	72	26	35	16	32	25	126	79	39	89	1507	114	21	338	142	156	86	21	27	215	163	151	129	99	98	73	71	47	65	1067	51	8571	4094	7432	15889	12189	7311	497	930	952	792	734	395
PCHAS_0103700	162	210	284	256	165	100	88	62	99	84	31	39	15	3	25	57	61	16	111	142	347	197	169	267	504	874	832	646	471	796	678	513	99	135	174	122	170	96	22	17	29	87	198	163
PCHAS_0103800	393	443	536	563	376	217	197	307	409	81	100	217	62	7	135	285	236	67	220	324	511	927	900	1040	1217	1365	1376	1119	684	1978	1103	1013	640	590	1027	645	1007	435	99	78	212	834	582	818
PCHAS_0103900	61	104	59	14	14	13	2	8	15	5	16	127	73	16	95	273	215	102	39	14	32	40	36	35	21	69	37	22	23	43	39	39	21	19	71	94	51	33	14	18	19	30	48	25
PCHAS_0104000	5967	7221	9895	8623	5636	2926	2436	3517	4322	1244	1185	4656	4080	176	4411	7567	5999	2457	5836	6128	8703	16410	13524	15153	17188	13916	11862	10811	7723	12580	7361	6088	3623	4581	6770	6405	8934	6989	5446	3930	13475	24430	10807	16497
PCHAS_0104100	557	814	726	626	625	570	664	778	959	508	244	393	47	10	147	108	127	45	230	449	329	247	145	374	816	1452	2265	1685	838	3173	3534	2108	1174	1265	1969	1037	1763	788	93	112	155	157	321	185
PCHAS_0104200	62	50	117	84	39	18	10	11	20	6	9	25	20	0	19	57	43	13	39	47	412	467	454	558	669	709	608	476	398	471	335	315	54	69	100	97	116	48	100	37	173	450	396	490
PCHAS_0104300	124	153	220	210	144	80	91	68	117	65	31	54	10	2	18	31	43	22	64	114	219	108	89	208	360	700	896	588	392	737	615	549	106	160	242	121	181	88	41	25	51	62	145	110
PCHAS_0104400	457	601	829	684	474	296	271	241	280	191	68	164	24	6	97	223	212	79	321	390	704	341	326	850	1057	1881	2113	1571	964	2161	1778	1294	299	289	556	417	614	261	73	38	141	206	446	411
PCHAS_0104500	1228	1256	1912	1582	1157	953	877	1503	1710	519	635	2170	541	41	764	1137	834	342	852	1184	2736	2525	2463	2899	3666	5107	4861	4337	2621	6223	7775	3935	4345	3973	6503	5845	7403	5286	2113	1807	3717	3596	4280	3490
PCHAS_0104600	449	577	705	597	451	354	414	475	667	296	249	649	40	5	181	165	179	67	215	358	589	345	232	559	1019	1845	2044	1576	994	2169	3206	1588	1552	1358	2035	1390	1847	920	159	176	232	201	489	310
PCHAS_0104700	205	251	210	221	178	232	246	302	414	203	160	443	46	11	150	136	123	80	65	142	97	74	90	115	218	408	606	431	236	731	1260	556	911	806	1240	926	1075	552	60	103	132	86	231	88
PCHAS_0104800	12	4	18	21	11	8	7	6	22	1	4	12	2	1	3	4	9	0	3	5	109	201	129	178	257	297	299	221	160	396	239	220	199	202	286	230	338	149	25	28	49	105	129	100
PCHAS_0104900	238	264	304	290	212	129	96	206	285	52	66	188	22	2	63	110	92	29	128	215	218	260	253	495	687	639	768	590	358	1041	649	523	393	441	680	522	773	359	70	67	115	305	188	261
PCHAS_0105000	21	17	8	3	8	5	3	4	2	2	3	36	8	1	28	42	63	29	11	8	38	136	77	94	88	104	24	22	22	31	9	24	105	80	86	144	173	119	16	18	24	81	38	24
PCHAS_0105100	85	164	81	19	22	15	6	10	19	7	18	174	80	19	155	440	387	224	69	18	12	17	21	35	8	42	12	4	6	30	10	17	22	14	64	108	43	20	10	14	9	19	19	10
PCHAS_0105200	542	624	623	585	579	347	347	465	582	128	133	260	52	14	103	119	107	80	85	283	82	94	56	276	756	850	1655	1260	600	2479	1258	1148	661	963	1031	765	1215	561	57	77	124	141	88	77
PCHAS_0105300	28	19	24	13	10	10	5	9	11	5	3	55	12	7	18	37	47	32	19	10	82	162	95	87	78	180	60	47	29	67	61	64	69	71	129	137	164	98	21	25	45	60	145	35
PCHAS_0105400	529	446	912	806	412	197	111	190	298	66	84	980	743	13	424	767	453	196	435	475	2769	4036	3973	3311	3233	3670	3019	2345	2022	2759	1678	1400	702	655	995	4078	3872	3567	3405	2428	6021	6672	4717	5101
PCHAS_0105500	1409	2113	2300	2157	1634	1014	984	1023	1303	537	323	589	143	19	393	677	728	240	891	1405	1049	1671	1294	2228	2915	3251	3777	2923	1655	4930	2373	2507	944	1161	1813	945	1784	798	173	110	284	1241	914	1241
PCHAS_0105600	352	563	562	523	356	265	314	287	363	277	117	386	227	25	344	591	464	223	327	403	1444	1307	1122	877	1210	1965	1678	1373	1031	1583	1922	1123	629	623	1027	1055	1128	714	992	680	1371	1457	2157	1553
PCHAS_0105700	159	326	125	32	41	32	13	15	25	20	28	236	118	43	254	730	572	396	137	34	40	78	62	55	35	109	38	21	25	41	29	37	33	30	114	122	65	38	21	30	45	50	83	38
PCHAS_0105800	830	1030	1372	1278	832	473	480	501	772	361	224	583	342	28	469	853	704	328	708	836	1839	1826	1759	1948	2338	3515	3251	2695	1831	3341	2700	2126	843	896	1402	889	1339	707	701	467	1421	1971	2367	2359
PCHAS_0105900	1644	2035	2610	2372	1489	777	542	860	1128	272	330	987	693	38	871	1796	1382	609	1247	1509	2276	3606	3853	5327	6137	4734	4466	3820	2520	5178	2702	2351	1386	1743	2137	2245	3141	1544	1167	580	2226	6316	2788	3902
PCHAS_0106000	2481	3136	3920	3389	2534	1836	1787	2662	2851	1105	797	1770	460	40	887	1485	1440	485	1576	2174	5979	6297	6040	8809	11823	16235	15038	12610	7862	17971	18116	10336	7593	8233	11616	7328	11202	5178	1403	1194	3236	6274	6195	7436
PCHAS_0106100	468	384	874	683	370	164	135	104	143	85	47	176	104	2	144	349	225	90	362	391	2555	2940	2154	1834	2500	3879	3243	2580	1998	2613	2049	1710	301	370	552	342	540	291	642	309	974	2386	3085	2739
PCHAS_0106200	3319	3556	5940	4745	2885	1332	836	1682	2300	458	723	2027	1333	61	1839	3490	2626	942	2929	3023	4305	12193	6951	8606	12442	7062	6931	6266	4406	7071	3269	3055	3291	3786	4161	3288	4938	3276	3170	2278	4215	14032	3954	7475
PCHAS_0106300	14	10	6	6	3	1	0	4	3	1	3	12	14	2	14	23	22	11	9	8	23	102	61	39	29	24	17	9	4	9	5	6	8	13	20	56	61	29	17	7	46	68	95	26
PCHAS_0106400	241	363	331	262	154	111	82	90	139	61	45	187	73	30	164	469	362	219	160	160	263	166	152	323	484	797	931	723	449	822	678	648	151	177	276	308	273	121	29	37	64	82	211	132
PCHAS_0106500	26	27	41	30	21	5	8	10	18	9	5	17	1	1	2	9	4	3	6	11	35	26	20	43	73	110	182	120	94	201	198	120	37	57	57	47	69	34	3	8	12	18	31	34
PCHAS_0106600	612	669	868	816	634	430	426	560	718	333	231	523	131	12	253	471	319	138	329	555	1576	1389	1205	1380	2132	3344	3122	2850	1787	3594	4609	2485	1669	2155	2785	1351	1974	1061	338	311	650	1259	1987	1764
PCHAS_0106700	322	359	604	451	275	154	120	131	211	105	48	98	38	6	104	219	224	87	347	310	1029	951	756	1095	1393	1926	1520	1312	962	1287	1046	829	239	318	429	288	361	202	69	39	143	697	804	852
PCHAS_0106800	107	90	98	86	58	36	35	57	76	25	17	67	21	12	61	133	132	64	62	60	125	232	146	162	225	276	202	202	133	230	176	133	117	112	158	230	271	148	29	32	59	129	143	101
PCHAS_0106900	903	658	301	260	262	474	343	1140	1185	170	486	2139	423	93	733	1420	1319	724	260	237	284	317	394	479	410	400	687	396	171	2244	3402	1260	7959	5214	8429	11046	10888	6045	579	869	1148	1100	658	410
PCHAS_0107000	204	220	391	332	170	87	59	43	83	34	12	54	12	2	46	118	103	26	156	176	555	612	455	871	1089	1193	1153	921	646	904	525	522	105	138	161	160	300	88	41	38	87	362	373	509
PCHAS_0107100	520	668	869	814	576	304	292	292	341	162	77	154	28	2	80	119	129	48	263	418	539	475	344	1091	1782	2135	2354	2104	1226	2579	1541	1449	409	699	798	470	811	371	52	52	108	281	271	349
PCHAS_0107200	476	697	820	833	532	255	301	206	255	246	72	140	30	12	112	227	234	89	441	502	794	453	338	671	982	1580	1618	1341	881	1412	1114	1069	171	304	359	223	346	169	50	41	86	212	506	350
PCHAS_0107300	1030	1335	1718	1527	1140	635	635	729	951	406	246	489	79	18	251	516	475	164	667	888	974	1418	963	2157	2931	3035	3280	2694	1705	3963	2342	2015	1116	1230	2004	1130	1795	880	106	115	277	929	662	1032
PCHAS_0107400	113	87	178	174	91	57	34	48	80	26	18	59	15	0	14	68	43	16	61	88	268	273	160	242	392	527	571	431	334	572	437	357	136	187	181	99	181	67	28	19	41	119	220	180
PCHAS_0107500	436	519	868	674	442	211	150	140	195	99	49	91	55	13	114	318	246	89	407	441	1131	1065	897	1823	2195	2509	2438	1816	1312	2140	1206	1067	243	300	429	328	571	205	73	52	207	759	777	912
PCHAS_0107550	92	64	104	121	75	51	52	93	112	41	47	98	12	1	26	46	28	5	46	54	286	267	243	252	359	563	719	482	315	833	1162	572	477	401	682	512	732	313	43	45	93	181	250	266
PCHAS_0107600	381	355	503	435	346	309	261	352	613	256	206	516	48	13	152	173	146	49	210	296	583	515	313	462	673	1298	1429	1052	629	1691	2373	1212	1075	793	1602	1397	1600	767	116	78	180	220	661	438
PCHAS_0107700	2211	2632	3586	2992	2276	1638	1603	1863	2576	1324	663	1159	179	27	516	746	755	237	1295	1850	3559	3106	2186	3498	5059	8851	9859	7303	4547	10730	11474	7294	2925	2892	5446	2832	4636	2049	412	287	643	1657	2974	2396
PCHAS_0107800	64	71	65	59	62	53	64	46	72	25	17	52	5	2	44	50	70	40	44	55	96	83	49	73	121	224	219	182	105	257	308	190	64	81	125	119	204	114	13	28	43	40	95	47
PCHAS_0107900	2857	3284	5175	4192	2772	1406	1100	1195	1589	706	384	807	461	41	732	1578	1320	442	2115	2760	5836	7076	5307	8368	11567	13458	12978	11068	6827	12675	7904	7137	1749	2625	3626	2784	3788	1961	684	390	1368	4963	4774	5710
PCHAS_0108000	6792	8647	12047	9641	5484	3527	3875	4507	5014	2930	1372	2433	1175	129	2374	8401	6972	2524	9772	8413	58187	23853	19065	31065	34585	49385	37761	35233	24583	26637	33647	21581	7078	8161	12191	10522	12792	6974	2729	1448	5795	14735	42684	25204
PCHAS_0108100	387	430	636	603	358	246	210	268	410	121	91	265	102	10	156	289	259	83	243	327	1052	1206	1137	1258	1459	1823	2250	1624	1071	2610	1908	1389	681	771	1121	828	1294	534	225	165	488	1125	1151	1241
PCHAS_0108200	1055	1259	1472	1328	1010	739	536	1544	1411	308	562	1754	441	18	588	865	743	269	664	951	2147	3228	3268	4955	6621	5033	4330	4473	2763	5777	5280	2869	8214	7181	8944	8350	10874	5030	1386	1160	2614	5938	2576	3693
PCHAS_0108300	1222	1678	1849	1842	1142	716	746	613	820	631	229	682	465	24	730	1147	1055	471	966	1258	4181	3391	2998	2732	3663	6096	5514	4636	3353	4442	5077	3190	883	1473	1613	1291	1784	1050	1289	989	2435	3326	5281	4209
PCHAS_0108400	145	131	226	197	137	57	42	37	64	27	21	54	41	0	51	103	93	21	98	132	626	495	412	575	747	1075	879	764	530	745	620	477	124	126	196	177	238	147	158	70	230	422	692	557
PCHAS_0108500	436	549	788	675	430	308	276	435	514	190	202	750	260	8	421	566	544	212	404	427	1456	2060	1761	1593	1940	1846	1827	1470	1115	1821	1583	1137	1568	1084	2128	1936	2402	1188	877	659	1457	2478	1899	2109
PCHAS_0108600	104	121	192	194	92	40	27	20	33	13	12	95	95	2	90	166	99	40	121	105	990	766	870	699	812	1290	999	871	624	718	571	488	76	78	144	313	353	341	541	311	1138	1154	1738	1257
PCHAS_0108700	58	68	118	86	50	19	17	14	29	9	15	90	30	4	49	84	66	33	36	45	134	155	139	141	181	182	199	148	118	220	166	122	87	77	107	407	311	206	141	122	291	254	220	170
PCHAS_0108800	1008	1126	1597	1456	805	429	265	352	479	134	201	2290	1269	23	1256	1610	1172	505	942	983	3214	7347	4663	4292	5749	3121	3585	2931	2348	3068	1498	1426	2057	1621	2151	14848	10509	10058	7047	6529	9004	10577	4561	6099
PCHAS_0108900	121	166	68	36	22	31	15	35	43	24	47	541	118	31	294	418	405	214	96	35	133	92	127	84	55	122	63	41	29	51	773	55	1704	941	2414	5146	3513	2533	309	633	782	236	815	178
PCHAS_0109000	303	358	455	455	282	175	173	227	310	99	83	191	29	1	85	160	152	49	193	230	353	326	329	740	975	984	1118	882	601	1366	886	695	479	507	708	646	817	363	63	74	130	272	289	354
PCHAS_0109100	603	665	1118	931	625	349	348	289	411	217	89	195	48	11	166	308	305	103	445	575	1037	853	683	1228	1395	2409	2395	1730	1295	2399	1863	1543	363	404	697	439	613	280	80	70	199	513	804	730
PCHAS_0109200	565	591	888	790	527	430	386	535	843	294	271	931	195	13	307	424	346	127	331	482	937	1708	1063	1142	1543	1510	1951	1336	981	2075	1715	1276	1362	1248	1793	1309	1806	1131	672	569	1072	1553	1000	1322
PCHAS_0109300	1244	1437	1812	1624	1143	918	658	1193	1726	393	538	1887	777	30	945	1381	1073	409	1025	1073	1864	4066	2769	2740	3106	2449	2946	1947	1597	3611	2540	1806	2407	2328	3409	3660	4836	3284	2035	1862	3832	5273	2218	3219
PCHAS_0109400	813	959	447	595	703	1475	1934	2546	3179	1721	1415	5671	430	70	1613	475	685	354	161	488	703	640	529	376	560	1398	1870	1339	663	3559	11585	2885	11089	7215	15103	16819	14383	8734	908	1021	1536	800	3449	709
PCHAS_0109500	437	533	824	613	472	301	256	212	250	226	68	150	21	2	67	118	117	40	277	353	667	327	216	478	849	1480	1938	1426	847	1896	1648	1382	280	311	452	363	554	294	63	43	105	164	414	242
PCHAS_0109600	283	207	458	378	265	162	94	236	386	64	96	271	34	2	40	75	67	15	99	171	410	345	454	870	1019	1354	1379	1145	717	2061	1711	1131	740	649	1544	855	1150	496	46	22	150	338	349	368
PCHAS_0109700	2669	3267	4021	3387	2848	2201	2053	3134	3771	1284	1036	2038	358	42	803	1003	1067	347	1571	2161	3212	4687	3521	6008	9195	9747	11232	9316	5305	15598	11399	8376	6897	7668	10666	6927	10144	4832	614	588	1416	3389	2942	2941
PCHAS_0109800	1502	1659	2249	2098	1397	906	585	1499	1902	306	625	1877	626	32	861	1364	1008	417	1041	1276	1826	3843	3076	4019	5166	3526	3561	3016	1915	4482	2844	2148	3415	3222	3929	4675	6390	3347	2154	1399	3419	6170	2290	3162
PCHAS_0109900	250	239	471	393	189	109	69	98	147	68	48	341	126	3	196	324	244	91	304	216	1208	1046	949	833	952	1449	993	937	688	713	1200	597	990	634	1273	2308	1785	1014	330	379	657	952	1715	1263
PCHAS_0110000	96	117	117	118	116	165	146	253	348	142	145	451	25	4	84	58	65	16	29	56	116	80	74	93	128	341	550	327	213	877	1845	635	1103	617	1640	1081	1419	652	68	48	113	71	273	89
PCHAS_0110100	386	438	802	601	380	260	208	267	402	152	122	286	23	7	80	155	140	40	267	354	943	678	516	1030	1391	2401	2369	1734	1338	2246	2430	1626	742	626	1013	966	1269	589	89	81	201	328	696	511
PCHAS_0110200	1115	1299	1634	1418	1091	1027	1148	1341	1859	993	665	1568	139	24	435	433	466	178	641	890	1529	1158	756	1503	2264	3766	4077	3149	2037	4556	6280	3289	3115	2679	4525	2923	4122	1936	310	263	446	597	1199	887
PCHAS_0110300	335	331	632	533	296	236	169	310	445	122	155	626	213	7	193	341	254	79	240	287	1357	2033	1885	1675	2180	2567	2304	1903	1375	2598	2587	1549	1996	1640	2739	2394	3181	1704	995	726	1642	2433	2062	2237
PCHAS_0110400	62	46	49	17	4	9	1	1	12	1	22	112	64	11	45	209	117	54	36	14	7	11	17	22	8	42	13	14	8	17	16	26	24	17	104	130	63	28	7	18	14	22	24	6
PCHAS_0110500	199	205	119	57	30	44	13	38	64	8	67	726	169	34	258	705	419	240	108	42	66	80	101	89	39	88	37	23	11	51	398	44	1453	712	2006	3893	2741	1472	149	284	317	190	210	72
PCHAS_0110600	3217	4232	5543	4508	3062	1957	2216	2095	2660	2025	903	2394	1626	84	2442	3474	3335	1373	3241	3484	12896	17120	10487	8557	10201	14795	12707	9529	7692	10877	10646	8226	3954	3368	5566	4461	6211	4013	8623	4138	9319	14058	16514	12849
PCHAS_0110700	867	742	632	609	430	1134	690	2689	2965	467	1623	5776	448	63	1043	958	900	361	406	471	777	1260	1019	1095	1189	962	1149	873	615	2300	4737	1464	13317	9374	13541	13352	14488	6383	655	564	1063	1818	1295	1101
PCHAS_0110800	324	390	441	461	329	280	324	309	510	221	153	341	32	5	95	120	126	50	137	233	424	436	284	476	869	1428	1760	1277	785	2085	2584	1377	981	893	1702	849	1212	611	81	81	131	225	405	339
PCHAS_0110900	15	24	15	31	22	58	50	116	103	66	59	282	15	3	43	15	24	14	12	11	50	47	43	36	41	66	49	44	50	99	545	108	600	380	628	681	733	338	68	55	88	47	131	59
PCHAS_0111000	859	888	1749	1362	819	427	320	460	702	209	186	637	444	24	421	777	591	222	695	826	4550	5632	5277	5343	6935	8137	7450	6878	4201	7437	5551	4823	1986	2566	3128	2288	3490	1924	1952	1242	3435	6489	5025	6102
PCHAS_0111100	393	380	141	128	57	89	39	143	156	60	157	1594	242	58	693	805	855	498	169	126	193	195	167	233	199	204	163	123	72	158	416	97	3834	1856	3045	8466	6511	4108	374	619	701	515	449	245
PCHAS_0111200	51	43	76	57	23	23	13	16	27	10	10	31	6	1	9	31	25	9	25	45	159	90	93	141	162	285	302	241	160	250	248	185	107	73	176	150	158	59	16	11	29	57	122	98
PCHAS_0111300	24	23	43	19	12	12	5	10	12	5	5	29	6	5	6	24	19	13	7	9	117	97	107	143	177	308	300	225	182	254	269	169	97	72	144	178	207	71	25	9	40	57	92	68
PCHAS_0111400	103	111	76	23	17	21	4	5	28	3	20	213	87	15	93	470	232	103	75	21	24	45	42	40	20	74	36	16	15	36	14	29	24	20	129	199	69	18	20	29	36	31	49	30
PCHAS_0111500	170	162	273	272	135	62	50	57	93	49	31	117	91	2	118	218	164	49	178	184	590	938	800	621	702	756	805	581	479	680	390	404	113	138	140	287	379	220	502	331	764	982	835	881
PCHAS_0111600	76	85	93	78	51	63	45	122	86	84	98	2488	286	45	833	182	193	109	68	66	535	363	360	173	209	261	240	233	152	190	1334	174	4156	1721	5426	22474	13288	8961	1099	1702	1850	911	3058	695
PCHAS_0111700	219	193	358	311	161	108	71	165	232	55	106	583	293	2	184	307	183	75	173	186	1370	1848	1381	1119	1341	1660	1483	1130	801	1309	1956	923	1077	1081	1587	1881	2222	1730	1870	1388	2407	2252	2697	2095
PCHAS_0111800	1308	1498	2372	2062	1211	647	498	654	846	339	255	1644	1656	36	1316	2121	1598	713	1410	1456	5979	8055	6186	5651	6037	6854	5596	4803	3542	4781	3513	2927	1097	1301	1729	3947	4660	4227	5785	3955	9024	11027	9994	8814
PCHAS_0111900	1608	1895	3259	2708	1759	991	873	882	1280	645	320	689	203	18	402	812	664	220	1083	1625	3662	3368	2532	3455	5021	9553	8435	6710	4580	7893	7834	5343	1578	1733	2819	1433	2292	1047	306	191	465	1733	3220	2752
PCHAS_0112000	313	480	559	545	350	177	235	193	221	196	69	314	141	7	265	420	345	154	332	369	1734	1730	1311	1067	1385	2211	1692	1351	1146	1383	1913	1113	748	648	1180	1158	1135	625	673	335	875	1315	2254	1690
PCHAS_0112100	121	98	174	172	97	65	52	58	91	36	24	76	18	2	20	59	33	11	61	58	264	192	140	240	317	642	623	428	320	620	588	412	137	148	272	152	224	90	20	12	44	102	223	175
PCHAS_0112200	30	32	76	52	38	34	29	42	54	23	33	863	72	8	189	51	54	23	30	30	392	197	200	169	260	378	388	310	210	315	876	222	3871	1407	4220	14268	10292	6316	570	1006	1395	523	1251	402
PCHAS_0112300	397	536	713	628	407	323	408	427	471	364	157	304	38	8	107	161	131	43	241	376	636	518	331	779	1209	2018	2266	1658	1096	2605	2643	1700	999	798	1595	932	1380	639	76	70	111	221	443	323
PCHAS_0112400	297	348	534	461	302	186	145	180	208	102	66	160	47	6	105	206	165	54	207	285	980	1236	920	1341	1974	2400	2176	1777	1235	2129	1799	1170	507	616	758	585	833	406	200	159	368	963	980	1048
PCHAS_0112500	33	22	19	17	20	9	11	23	21	5	21	696	82	11	195	62	40	31	15	21	111	102	87	77	95	80	86	77	55	103	178	56	392	161	566	5116	2851	1638	215	285	420	190	465	142
PCHAS_0112600	388	391	658	584	300	226	148	208	342	92	105	497	238	9	246	487	323	126	300	345	1580	1666	1623	1577	1815	2157	2001	1582	1218	1983	1933	1171	799	777	1340	1266	1684	935	812	579	1744	2109	2118	2239
PCHAS_0112700	143	86	20	57	47	327	158	1016	840	176	762	5376	172	27	713	175	242	87	29	75	355	274	237	212	168	77	83	73	63	180	3581	271	19664	12844	15885	24725	22729	13161	1011	1732	1799	1362	918	553
PCHAS_0112800	111	86	15	40	35	30	14	92	53	19	200	6865	1068	92	2368	449	438	334	49	72	774	543	635	362	288	151	97	72	85	37	213	60	4935	1333	4148	69599	44139	39060	4512	5715	6705	3249	2637	1513
PCHAS_0112900	12	13	9	9	6	5	4	15	8	3	12	334	30	3	92	36	30	19	6	13	52	33	36	15	19	14	14	5	10	14	116	12	631	164	868	2697	1567	815	78	100	145	87	120	41
PCHAS_0113000	189	159	272	276	123	67	36	45	63	29	66	2287	1436	10	805	829	479	279	246	191	1889	2080	2082	1118	926	769	716	569	493	514	409	339	241	223	372	9630	7154	6722	3873	2533	5924	4820	4681	3587
PCHAS_0113100	596	607	1021	898	451	298	228	285	417	169	179	1643	847	22	874	1213	918	404	838	575	3661	2824	2789	2390	2537	2765	2515	2123	1514	1967	2138	1413	1329	1158	1701	13134	9322	7573	4678	4145	8226	4191	6656	4461
PCHAS_0113200	143	161	140	167	106	305	307	592	616	375	466	2428	383	14	637	306	312	150	122	131	787	796	617	411	444	486	388	307	278	441	3106	462	4446	2808	5714	5880	5369	3568	1228	1059	1584	1165	2233	1169
PCHAS_0113300	6	11	0	4	3	6	8	7	6	11	6	9	3	0	5	8	2	2	1	3	3	6	0	1	1	8	7	4	3	29	31	10	14	23	42	12	8	12	3	4	3	0	6	5
PCHAS_0113400	148	197	231	216	130	67	84	83	100	53	33	269	265	7	266	267	256	104	207	195	73	100	101	43	56	67	58	49	33	43	46	32	19	14	24	90	81	66	116	72	142	105	150	110
PCHAS_0113500	79	58	17	32	35	367	294	752	759	402	578	2338	252	15	538	126	188	72	30	52	334	241	197	115	104	79	55	68	66	160	3840	288	5694	5086	6821	4686	5282	3602	841	839	1034	567	1412	599
PCHAS_0113600	162	175	218	243	104	47	39	41	54	37	51	903	815	16	654	630	522	302	262	188	2343	1934	1893	938	905	1163	603	604	525	386	675	319	356	406	526	2690	2754	2901	4299	2939	6314	3608	6235	3712
PCHAS_0113700	116	88	123	134	65	38	35	43	55	36	35	387	399	6	307	335	260	139	144	116	120	94	84	62	79	97	58	71	41	39	53	24	17	13	21	98	135	122	196	150	302	151	218	138
PCHAS_0113800	20	24	23	26	15	7	8	3	3	6	19	325	344	4	197	133	80	79	15	28	53	41	40	19	23	25	16	10	12	2	9	5	5	2	4	170	133	184	171	140	211	87	226	108
PCHAS_0113900	16	6	2	12	5	2	0	3	4	1	9	325	215	5	204	94	65	70	12	16	27	26	13	5	5	7	3	0	2	1	4	0	2	0	1	106	93	151	85	81	119	60	130	69
PCHAS_0114000	187	326	314	355	132	98	77	88	93	80	130	1836	2540	64	1704	1747	1527	776	442	363	13905	12459	9266	5442	5333	5886	3565	3661	3049	1864	2401	1535	1157	1296	1524	24089	21924	27424	19942	13137	23284	19810	39139	22431
PCHAS_0114100	1363	1247	1684	2080	1106	485	478	273	339	433	208	2409	2961	69	2752	2322	2098	1096	1486	1152	7796	12367	7925	6769	9041	9366	5899	5551	3864	4068	4053	3454	842	1691	1467	9419	9139	10350	7433	6036	9818	13498	16998	12957
PCHAS_0114200	1235	1407	1970	1794	835	463	383	315	356	368	456	8493	10159	175	6985	6844	5671	3367	2840	1587	21548	17010	12886	7910	7146	7664	5150	4541	4122	2526	3176	2450	975	1225	1433	29947	29322	34287	33912	22636	42134	30353	62713	28174
PCHAS_0114300	38	20	34	34	17	15	3	6	8	2	24	1024	150	11	185	82	52	33	12	35	312	218	284	172	161	93	96	57	57	56	95	47	877	276	511	19376	12468	11244	1953	2450	2865	1301	811	597
PCHAS_0114400	110	89	116	127	77	68	44	54	90	36	64	802	706	9	507	311	248	205	112	108	1125	852	653	454	517	595	471	420	311	470	660	354	333	342	513	3243	2963	3139	2107	2183	2831	1711	3302	1819
PCHAS_0114500	26	20	1	8	9	125	89	187	225	105	113	322	27	1	59	15	32	11	7	11	18	19	14	4	8	10	16	8	14	34	171	27	232	165	395	225	277	118	83	36	127	19	91	38
PCHAS_0114600	455	666	976	845	453	254	244	251	297	174	136	653	713	20	560	1001	815	362	496	680	3018	2917	2650	2269	3049	4105	3089	2838	2014	2312	2316	1525	790	761	1219	1506	1485	1334	2169	1171	3272	3936	5201	4378
PCHAS_0114700	78	59	44	85	35	21	20	19	18	15	60	971	1642	16	867	557	412	353	159	101	3205	1732	1340	935	691	525	343	409	402	122	332	172	172	209	208	5133	5484	6569	7774	5516	7667	4123	10711	4190
PCHAS_0114800	12	27	40	27	23	22	37	20	32	23	4	13	5	2	8	8	7	4	11	13	48	47	31	31	64	66	107	78	34	150	186	76	58	57	115	126	129	94	57	42	66	42	85	44
PCHAS_0114900	10	10	16	12	16	5	13	18	13	8	8	19	6	0	12	15	12	6	6	6	665	776	581	580	839	1172	1093	823	661	1062	1536	824	774	820	1037	831	876	632	385	277	628	829	888	780
PCHAS_0115000	15	12	10	6	9	20	14	27	44	14	5	22	11	2	14	18	32	10	8	1	29	44	34	47	34	65	52	38	22	143	186	98	212	161	425	400	333	232	11	14	40	35	58	33
PCHAS_0115100	5	2	2	1	1	8	4	7	11	2	1	10	0	0	3	2	2	0	0	0	10	14	16	17	16	17	36	27	10	55	90	32	50	60	78	71	96	42	8	8	13	14	19	12
PCHAS_0115200	11	2	10	16	3	3	7	12	13	4	5	12	2	0	8	4	4	2	3	0	100	79	74	84	117	130	186	130	77	219	344	181	273	239	365	270	366	218	43	38	66	111	117	99
PCHAS_0115300	1	0	1	1	2	3	4	12	10	1	5	19	1	0	3	0	1	0	0	2	8	2	2	2	3	11	19	6	2	10	41	21	81	46	145	52	92	38	12	8	17	5	22	4
PCHAS_0115400	15	5	0	1	1	8	5	16	25	3	25	236	109	2	110	41	25	34	2	8	107	63	76	25	23	24	13	16	20	8	33	10	82	45	102	1090	786	830	425	463	501	214	528	244
PCHAS_0200001	179	166	221	226	118	45	42	11	31	30	17	229	376	9	323	376	314	177	201	161	1173	1394	1089	796	924	1058	609	639	510	354	367	236	76	109	117	619	715	755	1404	969	1666	1808	2456	1883
PCHAS_0200005	43	44	36	40	26	31	72	93	178	61	166	594	29	7	92	68	65	23	16	32	45	56	26	48	55	62	107	73	29	253	623	153	772	459	682	400	684	348	46	30	76	39	83	49
PCHAS_0200011	27	19	8	23	17	27	99	86	197	70	210	680	18	6	100	26	45	9	9	21	1	2	5	1	3	3	9	5	2	49	74	24	47	52	115	60	67	42	7	4	19	1	15	5
PCHAS_0200015	9	9	9	16	6	9	25	38	66	23	93	297	13	3	57	19	20	4	6	11	6	8	6	7	3	6	11	9	6	29	79	11	91	56	125	45	88	40	3	9	10	9	10	7
PCHAS_0200021	41	31	33	40	30	19	51	61	161	35	126	387	22	4	47	21	18	2	13	26	1	0	1	1	3	2	7	16	1	31	22	12	17	13	24	10	19	8	1	1	0	3	11	2
PCHAS_0200025	24	15	9	12	3	8	32	40	130	30	184	768	22	7	95	35	45	1	3	19	6	7	4	1	1	6	6	6	1	28	74	9	112	85	116	130	167	80	9	3	7	9	13	4
PCHAS_0200031	21	20	6	24	13	22	37	94	132	65	280	1376	40	12	238	49	76	5	6	25	5	4	5	6	7	5	15	10	1	8	152	24	410	306	427	315	328	163	24	15	37	12	52	9
PCHAS_0200035	13	8	15	14	4	10	10	5	17	4	6	8	2	0	2	5	2	0	5	6	13	24	5	16	22	30	46	50	20	88	65	38	45	57	117	119	111	69	13	11	29	22	11	20
PCHAS_0200041	6308	8496	13185	9941	5511	3108	3210	2898	3226	3015	1324	8120	13054	286	11101	16824	14739	6676	12385	8250	62318	60363	43706	31782	42568	47877	33439	32345	24137	21070	23342	18517	7602	11417	10447	23656	28065	28682	47311	24401	56715	73434	101678	65671
PCHAS_0200045	107	77	215	168	66	54	22	53	67	37	30	124	21	1	73	159	137	41	246	91	862	611	382	484	476	487	441	364	280	263	431	247	261	181	273	556	503	246	160	98	250	377	943	418
PCHAS_0200051	2211	2924	3420	3109	1856	901	821	652	854	581	312	4245	3662	114	3674	4280	3851	1848	2368	2672	12938	14851	12847	10112	11228	14982	9876	9327	7136	6589	6277	4645	1251	1747	1984	11954	12000	14660	13428	9223	23611	23815	27311	21030
PCHAS_0200055	5	1	1	3	1	3	4	6	10	5	3	6	0	0	4	2	2	2	1	2	4	2	3	3	6	3	6	9	5	14	13	9	7	10	18	9	22	4	1	2	1	1	9	5
PCHAS_0200061	48	32	17	48	16	8	14	10	11	13	65	2659	1852	22	1143	489	351	327	35	73	2299	1333	1222	464	342	260	205	241	240	46	173	81	187	193	225	11510	10197	12083	10859	8073	12111	5068	10384	4581
PCHAS_0200065	136	96	16	37	58	515	414	1073	1171	522	736	3316	85	22	549	113	180	64	26	60	196	124	107	63	63	64	84	56	56	314	6279	558	7061	5962	9418	6869	8137	4361	399	618	873	292	941	242
PCHAS_0200071	71952	100796	151041	111611	71764	55411	62960	70665	76615	52443	30738	101261	38631	2187	58701	81466	80745	30646	87023	84450	325686	301414	232019	219093	304278	466002	353746	322498	225822	311845	433290	239188	198821	193467	313676	330676	348274	225951	80752	57799	123296	247835	389183	284022
PCHAS_0200100	7	11	13	13	4	6	3	0	10	2	1	17	4	0	6	14	11	3	10	9	45	27	24	22	41	62	49	33	24	37	56	30	8	12	12	103	84	61	34	15	35	27	57	33
PCHAS_0200200	301	257	588	491	277	109	54	90	154	48	32	123	43	3	64	187	119	43	218	269	403	444	407	717	934	1062	1107	963	629	1103	627	650	166	168	282	185	254	110	60	34	102	338	344	480
PCHAS_0200300	414	511	741	668	401	292	284	310	454	184	116	274	90	7	145	307	216	67	312	378	955	1085	821	942	1320	1649	1774	1266	1008	1755	1611	1195	504	532	812	493	714	351	192	135	337	762	930	978
PCHAS_0200400	862	907	1505	1320	748	351	278	317	462	149	142	400	271	20	450	1067	791	280	1037	864	2804	3264	3231	3495	3480	3828	3036	2531	2061	2544	2050	1569	610	764	1075	1203	1387	833	451	373	1049	3061	2728	3557
PCHAS_0200500	10	8	13	20	6	7	6	3	8	1	0	15	3	1	5	6	8	3	5	10	229	119	166	158	144	422	307	250	180	305	370	194	96	78	114	117	134	59	30	27	53	142	290	220
PCHAS_0200600	195	206	350	331	205	106	72	94	181	43	47	141	51	2	66	164	127	55	171	198	728	637	579	619	707	1221	1088	862	662	1063	1175	780	237	264	396	371	526	232	142	106	283	514	892	750
PCHAS_0200700	808	1074	1431	1337	917	581	556	596	858	421	238	713	170	15	383	666	582	172	603	824	2250	2500	1863	2066	2814	4277	3958	3210	2212	3786	4110	2579	1671	1362	2470	1789	2213	1078	464	333	816	1983	2564	2331
PCHAS_0200800	156	107	87	81	86	285	189	491	769	138	389	1511	61	10	219	95	104	37	39	47	72	93	56	67	81	92	242	143	67	597	1334	395	2816	1565	3900	2553	3184	1540	74	83	169	129	175	91
PCHAS_0200900	114	71	75	95	72	163	121	352	487	76	211	1039	36	4	114	82	77	25	25	59	182	119	97	127	128	241	337	226	131	811	1991	555	3026	2030	3954	3236	4025	1779	152	301	375	174	293	173
PCHAS_0201000	158	141	251	228	126	84	77	59	107	72	29	89	16	2	18	56	53	17	102	133	347	257	180	237	467	743	735	563	416	611	659	519	189	222	244	225	290	149	48	42	55	107	241	183
PCHAS_0201100	180	150	193	122	104	47	38	36	40	18	32	151	50	10	110	184	219	97	98	84	135	272	188	208	253	267	274	180	127	268	119	140	197	150	232	384	451	259	72	53	114	216	157	112
PCHAS_0201200	217	265	355	303	204	111	126	109	145	88	31	150	108	8	145	241	222	96	203	205	1162	1266	891	700	987	1495	1309	1031	797	1037	949	655	274	323	414	500	625	444	691	447	791	1155	1677	1207
PCHAS_0201300	863	1033	1212	1110	782	618	590	878	1060	379	310	1230	576	51	767	1232	977	445	674	748	2360	3044	2432	2088	2622	3384	3173	2688	1675	3861	3940	2386	1758	1616	3017	3268	3352	2287	1982	1359	3055	3605	3730	3190
PCHAS_0201400	4953	5904	5724	5076	5222	6866	7142	11858	14633	5274	4294	7351	832	121	2321	1753	2104	704	2189	3275	4643	5997	3841	5071	7097	10686	15819	11491	5459	30502	35222	20288	21367	21005	32713	17128	27665	13667	1100	1389	2355	3410	5569	3185
PCHAS_0201500	470	589	672	583	401	258	268	309	347	144	144	768	428	21	500	673	533	277	407	508	2027	3971	2996	2885	3842	3049	2353	2129	1631	2454	1810	1275	1482	1471	1954	6927	5180	4516	2849	2350	4997	5727	3293	3804
PCHAS_0201600	1027	1469	1573	1399	1079	765	826	1347	1403	521	463	1410	332	32	715	967	863	399	797	1002	1460	2349	1961	2608	3328	3008	2944	2469	1666	3824	2881	1988	3005	2435	4200	3722	4750	2343	946	655	1870	2950	1823	2260
PCHAS_0201700	392	567	690	565	398	270	305	285	420	251	116	375	203	4	318	446	395	190	376	430	1096	1458	1010	812	1068	1579	1477	1216	868	1451	1490	985	557	548	879	660	917	554	855	572	1175	1478	1734	1379
PCHAS_0201800	142	219	234	246	195	138	136	160	207	116	53	98	13	4	48	68	78	25	98	121	357	335	229	292	478	866	1001	727	471	1149	1312	770	349	284	599	347	505	204	37	29	68	141	344	267
PCHAS_0201900	237	273	428	344	243	140	136	141	217	107	59	153	25	4	65	104	72	38	136	202	431	279	268	490	640	1005	1274	828	551	1453	1131	803	295	279	610	394	580	254	39	21	103	173	306	251
PCHAS_0202000	168	219	192	79	66	48	15	33	77	19	33	261	135	41	208	561	437	244	101	40	154	128	114	179	203	353	340	268	206	372	270	249	134	144	284	288	253	110	25	39	56	95	156	76
PCHAS_0202050	159	195	219	169	121	119	118	114	177	117	69	190	28	3	64	75	75	41	63	110	109	62	43	93	188	425	628	451	248	724	1175	525	576	650	785	680	773	520	98	164	186	60	191	86
PCHAS_0202150	18	18	16	10	9	32	17	42	61	21	37	204	8	1	25	26	9	8	5	14	62	28	27	23	30	48	66	69	29	137	804	116	725	524	1065	1089	1169	643	93	168	240	61	191	60
PCHAS_0202200	1001	1131	1922	1545	996	501	437	655	855	214	216	782	448	22	544	896	707	274	890	975	2047	3348	2813	3383	3879	4054	3568	3062	2121	3936	2237	2011	1253	1186	2009	1810	2456	1676	1107	664	1885	3852	2394	3009
PCHAS_0202300	305	348	547	470	307	187	144	234	297	110	75	494	250	9	276	425	351	125	307	283	1702	1964	1581	1226	1275	1981	1725	1324	958	1545	1442	1226	465	449	755	1309	1389	1199	1542	1085	2374	2223	2771	2279
PCHAS_0202400	143	141	252	208	108	56	31	35	45	37	13	47	29	6	43	102	102	36	121	132	480	430	342	300	461	607	607	489	381	437	373	308	48	81	63	96	131	59	93	53	137	324	467	389
PCHAS_0202500	280	341	508	440	285	173	179	174	264	139	45	137	48	0	114	217	161	63	215	255	995	1032	733	715	1071	1537	1638	1278	887	1459	1590	1114	347	410	605	409	613	291	269	145	411	760	1175	982
PCHAS_0202600	400	379	837	566	375	325	319	397	581	189	159	386	63	8	119	117	125	42	171	272	466	493	278	530	767	1654	2202	1535	956	2805	2934	1981	1113	937	1614	1503	2099	954	172	144	313	236	644	186
PCHAS_0202700	11	7	34	24	15	12	3	5	18	3	4	22	6	1	7	18	8	3	15	7	52	53	34	89	97	185	183	149	111	207	188	115	44	59	88	68	91	44	10	10	19	29	80	61
PCHAS_0202800	821	976	849	711	408	241	222	238	349	205	160	630	297	85	642	1343	1365	764	535	456	1039	829	657	851	1108	1794	1786	1415	945	1611	1464	1158	451	536	899	801	953	484	157	209	261	543	836	728
PCHAS_0202900	1587	1599	696	415	203	199	78	155	256	93	331	1956	980	238	1520	3994	3368	1935	673	392	285	456	510	718	406	1001	486	305	199	513	299	359	960	686	2049	2370	2111	1109	267	339	396	614	576	263
PCHAS_0203000	26	22	11	11	10	9	12	22	15	8	35	1011	212	13	412	94	91	64	12	19	152	71	146	48	43	69	29	29	33	28	121	32	349	91	526	9620	4071	3024	767	1001	1211	193	1214	228
PCHAS_0203100	406	446	675	539	365	376	326	553	744	268	265	893	90	12	259	309	249	109	294	333	1054	882	720	855	1106	1741	1753	1427	1001	1921	3567	1446	2145	1855	3112	2330	2610	1303	276	357	548	599	1218	951
PCHAS_0203200	1212	1531	1729	1627	1121	1215	1184	1780	2266	929	801	2609	501	49	1022	1090	1128	447	895	1103	2587	1919	2153	2279	2750	4378	4395	3657	2350	5147	8040	3352	5687	4815	7722	5552	6937	3539	795	733	1750	2284	3592	3150
PCHAS_0203300	361	460	590	512	351	202	178	196	237	103	74	405	198	8	156	206	173	53	238	338	3312	3124	2563	1682	2163	2977	2790	2094	1709	2189	1752	1478	404	485	708	4774	4773	4760	3809	3258	4895	3918	7357	4693
PCHAS_0203400	1462	2136	2563	2430	1262	564	532	379	446	412	430	8246	6844	167	6694	5205	4778	2617	2636	2233	16921	17237	14831	8222	8502	10830	6790	6192	6084	3418	3524	2830	756	886	1439	26962	21791	23900	16313	12514	29278	26720	38773	25391
PCHAS_0203500	485	614	773	703	520	398	406	423	559	310	166	975	434	24	472	632	414	221	394	519	2020	1719	1270	1111	1499	2433	2348	2018	1339	2394	2943	1703	688	798	1289	2242	2440	2334	2084	1096	2570	2393	3988	2156
PCHAS_0203600	9824	11055	14197	12803	8712	6863	4970	9535	14005	2714	4535	15420	3735	251	5595	8404	6229	2553	6610	8550	11135	18275	15637	19642	21897	18879	19734	16858	11278	26812	21941	13208	23806	22238	34957	25582	33811	18586	6644	4939	12113	23830	13011	17825
PCHAS_0203700	374	393	676	537	363	216	177	228	370	106	100	175	36	7	93	178	160	38	236	311	746	742	650	1002	1368	1809	2058	1597	1021	2132	1657	1235	470	512	791	578	845	345	74	47	170	410	580	672
PCHAS_0203800	1736	2278	2741	2509	1975	1439	1586	1714	2217	1208	598	1071	142	26	440	678	664	216	960	1623	3230	2650	1863	3113	4257	8734	8461	6269	4249	9470	11582	6595	3043	2842	5450	2850	4564	2043	268	224	594	1340	2658	2301
PCHAS_0203900	237	330	548	395	239	136	127	96	96	97	31	70	44	4	105	242	209	74	287	251	1348	1155	849	966	1099	1620	1659	1249	924	1347	1107	857	181	203	284	225	384	163	226	102	414	899	1320	952
PCHAS_0204000	352	429	715	515	329	176	129	160	174	100	31	106	33	9	61	145	118	46	255	285	540	433	327	829	1417	1635	1842	1409	895	1924	1002	931	234	285	378	400	599	196	91	50	162	312	407	335
PCHAS_0204100	101	130	216	161	111	82	75	76	106	57	25	44	12	1	25	30	30	12	41	85	191	72	69	209	336	655	890	668	380	952	879	602	138	145	241	196	334	126	17	26	30	37	144	68
PCHAS_0204200	389	266	98	89	27	29	11	45	22	8	60	395	128	40	351	599	748	432	109	109	63	263	212	258	242	147	98	90	57	103	65	77	529	456	627	1176	1482	968	204	327	273	543	178	117
PCHAS_0204300	3512	3898	5441	5037	3197	2321	1828	2963	3508	1241	1215	5333	1791	84	2197	3278	2589	991	2421	3167	11207	13514	13163	14342	18419	20400	18815	15589	10412	21107	21287	12097	15814	15616	19727	36900	35504	23678	11477	9623	19804	21143	16297	16576
PCHAS_0204400	589	529	1052	831	617	505	305	639	1008	233	344	897	85	5	167	161	135	39	252	426	816	543	351	1034	1775	3589	4047	3067	1777	5157	6961	3263	3020	2285	5176	2967	3759	1865	173	202	347	332	899	460
PCHAS_0204500	270	335	645	499	280	167	115	99	170	79	48	93	29	3	75	192	129	49	252	276	656	523	406	614	952	1422	1313	1115	723	1150	883	825	170	276	299	204	289	147	47	27	79	274	473	442
PCHAS_0204600	153	171	335	253	142	58	47	47	58	35	22	41	13	1	35	77	62	19	137	140	425	172	184	452	485	855	830	636	504	708	563	385	77	64	142	110	160	58	14	8	48	121	293	263
PCHAS_0204700	197	188	293	228	123	354	270	619	604	326	432	1826	64	21	409	187	211	86	132	131	594	585	367	540	739	965	999	711	556	1030	2941	800	3658	2114	4323	3776	3962	2014	240	312	466	343	850	444
PCHAS_0204800	166	195	272	225	153	104	78	100	152	52	41	106	15	2	30	95	53	21	115	145	642	434	409	642	812	1403	1400	978	723	1448	1517	889	344	333	634	419	672	252	54	52	128	289	536	441
PCHAS_0204900	377	464	309	364	364	509	609	777	889	472	270	747	48	9	190	73	97	40	66	220	188	154	91	160	316	681	1507	1076	465	2371	4173	1782	2056	1896	3109	2453	2938	1431	167	223	357	162	448	152
PCHAS_0205000	660	744	1213	1112	578	227	150	149	221	93	87	882	879	17	752	1102	836	375	679	718	1771	3081	2826	2740	3033	2422	1934	1779	1354	1575	697	798	237	394	385	1945	2028	2039	2283	1464	3705	5372	2648	3592
PCHAS_0205100	7	2	4	6	5	2	1	7	12	1	4	17	5	0	8	5	5	0	2	4	27	20	21	9	24	29	16	11	11	13	20	16	23	17	20	41	39	22	24	18	28	34	51	27
PCHAS_0205200	276	346	331	303	268	326	309	518	663	203	242	584	43	9	146	79	85	33	70	176	81	89	45	133	263	304	676	460	192	1399	1276	753	1252	1019	1516	1541	2066	898	64	79	147	119	112	73
PCHAS_0205300	197	248	365	343	174	83	64	35	58	51	12	183	168	6	231	317	219	139	227	203	1121	1246	963	750	902	1319	1012	841	678	645	590	435	98	120	151	247	359	330	658	329	838	1263	1776	1399
PCHAS_0205400	2984	3684	4243	3950	3030	2665	2572	4119	4632	1757	1504	3621	446	69	1096	1292	1389	407	1541	2376	4483	4471	3846	6635	9563	12999	14549	11578	6739	19491	22054	11805	14522	15793	19803	13250	18503	9600	1303	1722	2610	4010	4428	4538
PCHAS_0205500	25	26	21	14	15	30	18	31	38	20	26	197	20	3	59	43	46	24	15	15	50	41	40	31	42	77	90	67	45	84	444	71	528	224	714	1033	774	416	53	70	97	48	186	64
PCHAS_0205600	401	346	793	538	319	183	133	146	254	90	61	209	100	6	140	335	191	59	300	324	2378	2267	2212	2091	2561	4240	3468	2740	1953	3042	3259	1980	621	640	1125	876	1315	555	485	252	1069	2029	3140	2567
PCHAS_0205700	24	11	18	17	14	69	42	148	179	60	139	644	13	2	80	22	28	14	3	16	50	40	35	31	21	36	56	32	29	116	837	123	1407	768	1878	1583	1966	920	61	70	148	62	129	55
PCHAS_0205800	106	98	182	155	99	51	40	38	73	34	17	37	10	0	27	78	46	15	82	104	233	216	180	281	387	570	581	476	318	549	401	302	98	83	140	99	145	49	16	8	36	137	182	200
PCHAS_0205900	98	72	26	32	34	222	147	552	576	180	461	2894	123	12	384	132	162	55	32	43	205	127	113	91	52	109	51	48	33	168	3019	264	6181	3654	7874	7253	7780	4027	343	626	901	348	761	256
PCHAS_0206000	46	51	32	28	23	28	24	26	40	19	13	57	28	3	39	63	64	38	21	20	16	40	40	46	40	31	66	34	22	140	105	83	46	46	108	158	185	78	16	10	32	47	42	21
PCHAS_0206100	439	485	761	620	389	241	217	324	399	90	107	295	121	7	166	317	231	133	283	394	875	1644	1293	1985	2934	2477	2487	2192	1337	2941	1623	1490	1027	1222	1432	1079	1703	743	388	286	607	1871	1018	1314
PCHAS_0206200	225	239	442	375	243	116	106	124	163	65	41	101	19	1	39	93	62	19	160	181	439	394	282	585	859	1358	1511	1165	797	1551	1072	982	241	277	408	304	451	215	39	38	62	149	319	312
PCHAS_0206300	12	7	4	5	3	8	14	19	9	11	22	297	22	4	91	23	17	15	3	6	46	24	36	6	6	10	10	9	10	25	258	20	547	232	782	2745	1703	1098	135	221	226	100	366	69
PCHAS_0206400	165	178	64	62	134	370	457	775	912	478	382	1062	67	9	239	83	157	61	35	57	160	177	118	97	63	166	470	237	93	1344	4194	1134	3361	2137	4511	3395	4360	2040	189	210	315	155	643	147
PCHAS_0206500	394	346	981	665	310	130	62	64	121	49	34	102	58	3	105	299	185	75	341	356	1556	1989	1733	2356	2943	3377	2942	2591	1802	2288	1300	1474	215	338	362	395	527	231	198	92	388	1511	1348	1717
PCHAS_0206600	310	406	468	465	323	254	268	313	464	231	138	279	40	3	112	134	123	41	169	283	423	378	257	510	693	1336	1427	1038	707	1636	1922	1082	713	582	1119	642	913	418	63	68	97	209	423	301
PCHAS_0206700	9	8	3	4	1	2	3	5	6	4	11	306	101	5	88	44	25	22	1	4	205	103	103	49	37	46	36	24	27	30	124	24	339	165	402	3580	2457	2118	876	969	1391	308	1096	401
PCHAS_0206800	7	7	2	2	1	1	0	2	0	0	3	18	5	1	9	11	13	8	7	4	18	13	10	14	11	32	12	5	6	7	1	6	10	15	14	15	34	25	8	5	12	16	14	8
PCHAS_0206900	157	196	299	273	171	62	60	62	79	27	24	55	48	0	79	166	149	53	149	185	665	912	877	970	1106	1263	1037	925	670	1011	618	458	132	164	230	169	241	105	168	80	321	880	688	852
PCHAS_0207000	315	306	619	460	291	158	128	116	197	86	45	125	51	2	63	175	138	58	212	232	932	1227	816	945	1361	1993	2003	1519	1059	1863	1398	1160	326	329	563	319	540	221	195	108	276	672	968	938
PCHAS_0207100	542	633	963	721	504	340	313	375	513	272	149	331	38	8	157	243	214	66	423	492	901	831	532	1035	1568	1876	1780	1648	994	1998	1723	1135	682	781	1218	863	1345	594	94	89	168	458	574	540
PCHAS_0207200	2893	3142	5009	4193	2514	1162	778	1560	1676	328	579	4275	3627	91	2713	4718	3448	1430	2800	2905	8594	22662	15059	15009	20694	12084	10259	9626	7718	9576	5284	4638	4103	5474	4933	16097	16457	17518	14717	12412	22041	36242	12650	18595
PCHAS_0207300	346	246	531	439	286	171	79	166	268	73	144	3944	531	34	828	271	177	103	142	232	1054	1019	912	1035	1465	1707	1743	1405	843	1996	1616	1256	2983	1584	3527	42560	25394	21324	3655	5329	5254	1979	4061	1554
PCHAS_0207400	17	5	6	15	8	11	4	15	21	13	24	536	41	4	118	39	28	17	4	10	111	85	75	54	52	31	27	28	16	27	389	26	2000	851	1906	9021	5659	3925	491	788	867	328	490	160
PCHAS_0207500	2	0	1	1	0	0	1	0	0	0	0	2	0	0	0	2	1	2	0	0	0	1	2	0	1	2	2	0	0	0	5	3	0	5	2	8	3	3	2	0	0	1	6	1
PCHAS_0207600	722	664	1311	966	672	566	427	737	1041	348	369	1210	141	11	298	370	302	70	396	541	3368	2578	2379	2925	3983	6506	7015	5476	3576	7524	11353	5624	5577	5772	7632	5992	7671	4028	733	942	1554	2086	3723	2840
PCHAS_0207700	109	124	49	22	20	20	12	15	17	16	26	118	69	29	149	299	298	223	63	40	70	107	58	114	45	190	39	36	30	40	19	50	68	74	117	94	111	68	18	19	23	34	91	31
PCHAS_0207800	280	341	484	425	314	155	145	161	206	105	49	90	19	1	59	120	100	40	130	234	531	255	213	536	815	1613	1857	1477	904	2037	1467	1209	292	352	542	260	502	199	25	32	51	174	332	287
PCHAS_0207900	664	925	1227	1152	731	290	308	262	362	199	78	181	96	3	222	538	465	153	529	766	1384	1525	1377	1853	2373	3043	2796	2327	1579	2489	1694	1307	286	388	613	342	558	284	192	112	561	1438	1303	1543
PCHAS_0208000	279	353	432	351	289	181	157	191	242	113	50	96	22	3	44	76	66	28	140	203	306	164	168	382	658	1047	1404	1103	591	1753	1590	1012	287	377	540	382	573	228	36	46	107	107	189	180
PCHAS_0208100	11	7	9	9	5	9	5	5	6	2	2	22	10	1	10	13	12	8	8	7	36	13	21	22	20	46	46	33	25	58	72	40	16	29	35	52	56	26	10	10	17	14	53	25
PCHAS_0208200	368	449	656	590	395	263	223	281	410	116	87	214	72	7	141	250	181	86	226	319	697	856	813	1153	1410	1774	1971	1497	1049	2374	1515	1333	629	545	972	639	1035	384	197	120	380	725	696	866
PCHAS_0208300	303	237	620	452	223	131	81	120	168	60	48	318	166	9	200	421	282	101	347	261	4030	4505	3868	2761	3495	4144	3357	2950	2271	2294	2837	1621	1421	1279	1869	3017	3055	1802	1484	911	2772	5009	5878	4687
PCHAS_0208400	533	654	822	678	554	428	348	681	786	205	246	633	55	13	151	228	212	102	304	405	560	585	476	1186	1735	1608	2033	1581	1031	3048	2033	1446	1840	1679	2394	2364	3465	1380	119	168	332	445	361	478
PCHAS_0208500	22	23	19	16	10	55	31	59	82	51	54	293	25	2	56	64	48	35	13	16	43	40	36	31	31	47	41	24	29	54	431	81	679	381	820	840	833	426	58	67	107	40	131	59
PCHAS_0208600	1535	1803	3107	2388	1519	749	621	799	1102	349	277	773	637	19	805	1437	1249	430	1491	1551	3894	8294	5834	6185	7537	7263	6438	5739	3771	7117	3548	4019	1645	1733	2680	1820	2860	1565	1888	1125	3331	7862	4316	6225
PCHAS_0208700	7	8	15	19	11	4	2	9	9	0	1	3	7	0	6	16	14	4	1	18	21	50	57	73	102	99	41	66	52	44	45	15	31	19	34	30	20	14	6	10	14	39	20	64
PCHAS_0208800	361	372	413	359	345	382	289	722	690	223	363	1162	70	7	213	176	198	71	159	238	268	572	262	440	879	652	922	711	375	1460	1409	778	2749	2383	3427	3090	3774	1877	239	318	366	525	304	284
PCHAS_0208900	745	832	1075	891	658	481	315	986	963	209	403	1344	213	15	368	600	530	192	546	598	1161	1869	1692	2840	3322	2625	2252	2128	1309	3045	3011	1499	4325	3850	4904	5320	6649	2926	397	515	1034	2615	1305	1786
PCHAS_0209000	3246	3828	5394	4632	3383	2000	1479	3024	3175	737	813	1919	586	57	998	2024	1606	605	2181	2992	3246	5389	4646	8241	11219	9783	8977	8375	5591	12168	7081	5812	4773	5916	7441	4847	7310	3683	907	733	2104	5805	3131	4880
PCHAS_0209100	183	180	212	208	144	159	129	255	352	87	119	469	31	6	87	87	83	37	48	112	64	126	63	195	246	326	531	353	186	852	757	474	1105	754	1342	1237	1600	731	61	50	88	97	96	48
PCHAS_0209200	233	246	381	332	216	165	143	176	288	114	91	284	36	3	93	122	124	34	143	188	551	568	388	457	664	1090	1201	908	674	1117	1318	852	663	599	945	715	926	434	135	132	236	401	658	522
PCHAS_0209300	116	145	208	149	113	72	83	105	145	78	47	124	13	2	46	76	65	16	99	112	244	215	187	211	229	473	436	379	276	470	563	359	220	186	397	276	390	170	44	44	92	140	263	208
PCHAS_0209400	402	550	814	704	416	181	185	184	230	154	84	338	143	11	289	507	450	166	478	517	1936	1930	1595	1415	1747	2755	2029	1708	1373	1346	1331	1015	481	423	756	675	797	409	426	241	821	1683	2248	1906
PCHAS_0209500	266	352	364	328	268	204	235	338	417	162	143	427	37	6	125	208	227	76	199	254	626	561	513	649	800	1111	1100	845	600	1174	1748	769	1083	908	1380	1107	1477	686	103	94	215	429	679	571
PCHAS_0209600	399	485	604	582	412	337	334	379	585	218	167	406	52	11	112	174	203	55	222	345	821	667	623	870	1085	1797	1972	1457	1009	2362	2600	1414	1030	990	1722	1291	1817	773	118	151	271	464	706	650
PCHAS_0209700	348	429	558	538	313	186	162	144	196	115	60	237	168	10	212	437	283	105	276	410	1243	1643	1352	1107	1321	1972	1692	1379	971	1504	1144	898	261	338	487	338	542	355	696	386	1102	1744	1947	1711
PCHAS_0209800	285	253	574	349	282	126	109	139	210	50	42	91	31	4	43	126	79	19	209	249	554	366	309	709	888	1391	1116	1085	729	1377	1007	768	208	252	448	192	402	185	49	29	90	225	410	339
PCHAS_0209900	2578	3546	4240	3711	2833	2050	2339	2377	3025	1853	779	1362	262	41	734	1088	1049	369	1690	2342	4986	4451	3201	4598	6873	12471	12147	9638	5968	13803	14650	9226	3824	3932	7084	3548	5529	2636	509	356	963	2477	4170	3641
PCHAS_0210000	180	230	267	230	180	137	132	217	257	95	77	194	32	4	74	97	129	37	106	154	421	351	335	555	610	1062	1095	834	634	1332	1733	925	763	600	1167	833	1090	423	51	76	133	217	411	359
PCHAS_0210100	160	188	220	229	154	87	91	85	101	42	29	69	15	4	58	112	97	32	138	176	389	399	344	545	823	884	820	757	458	688	494	370	235	258	310	197	344	164	38	33	110	338	336	385
PCHAS_0210200	252	296	371	351	240	141	97	174	238	69	52	149	31	5	93	162	133	51	140	211	634	513	565	828	1004	1388	1334	1058	712	1589	1293	825	433	418	730	505	749	297	101	89	251	549	576	659
PCHAS_0210300	900	877	1505	1302	836	581	410	756	1122	213	325	947	159	16	272	503	355	152	462	708	1331	1452	1645	2788	3569	3636	3899	3469	2050	5420	4465	2596	3260	3341	4855	4097	5275	2530	368	524	793	1615	1355	1733
PCHAS_0210400	549	579	851	821	519	235	139	254	375	64	90	764	159	13	309	438	377	141	365	491	1174	1693	1882	2958	3565	2679	2379	1965	1437	2674	1511	1190	1588	1036	1853	12435	8065	5325	784	747	1258	2584	1672	1851
PCHAS_0210500	2897	4125	5236	4523	3067	1520	1534	1343	1789	1070	474	1727	1624	55	2341	3497	3251	1288	3156	3430	7607	13539	9291	7866	8948	11815	9819	8196	5652	9284	6472	5765	1519	1760	2999	3211	4269	3543	6987	3944	9387	13807	11136	10819
PCHAS_0210600	357	377	425	401	346	345	207	824	742	108	305	1005	51	5	146	118	122	40	96	220	181	166	148	444	722	831	1115	924	470	2006	2192	1065	3498	2825	3926	3697	4890	1980	192	279	418	290	252	196
PCHAS_0210700	110	100	142	91	84	87	64	112	191	47	61	188	11	2	45	42	49	24	30	55	135	155	126	231	333	487	731	548	336	974	915	654	575	452	771	715	965	378	40	79	87	82	133	91
PCHAS_0210800	350	430	724	519	379	257	217	291	398	144	95	207	30	6	75	150	123	48	256	279	465	401	270	636	959	1345	1507	1103	736	1771	1345	1095	537	451	834	656	958	380	53	38	116	208	286	298
PCHAS_0210900	182	144	313	248	146	80	41	67	108	34	27	65	17	3	38	77	44	20	89	133	232	201	105	295	454	713	688	527	378	655	472	481	131	149	210	157	221	123	18	28	43	90	141	122
PCHAS_0211000	12	4	7	5	3	3	3	3	6	0	3	10	5	2	5	8	5	8	5	4	28	38	28	31	38	67	57	58	27	41	55	45	18	11	19	37	52	25	7	8	13	14	45	11
PCHAS_0211100	1232	1673	1898	1745	1205	669	577	793	969	273	280	606	183	30	404	887	731	280	777	1176	1320	3233	1737	2995	5039	3208	3895	3059	2236	4500	2115	1969	1448	2132	2084	1397	2044	1174	373	381	693	2482	1119	1880
PCHAS_0211200	53	45	21	32	31	22	19	52	65	18	44	497	41	8	104	67	60	29	18	16	95	72	69	60	71	67	67	71	47	129	371	98	1087	449	1325	3921	2493	1505	149	253	286	161	401	131
PCHAS_0211300	221	211	312	240	210	186	191	307	403	112	160	399	26	2	82	50	53	19	70	144	178	193	123	320	508	765	1229	849	465	1725	1492	1068	1392	1060	1873	1147	1700	738	67	64	104	133	192	172
PCHAS_0211400	776	985	1148	1050	832	731	793	878	1347	550	374	715	187	20	371	554	429	182	452	623	1242	1719	983	1136	1792	2122	2725	2022	1193	3413	2979	1907	1636	1758	2183	1440	2369	1181	506	459	780	1425	1354	1268
PCHAS_0211500	320	340	511	454	307	218	151	188	280	161	73	225	117	5	151	250	228	81	229	261	1181	1094	846	715	898	1603	1640	1226	869	1493	1539	1043	401	368	629	468	731	363	433	230	596	921	1451	1155
PCHAS_0211600	340	298	122	97	142	454	270	1328	1203	214	760	2887	178	32	573	377	437	202	90	135	186	192	184	207	176	169	233	171	93	670	2059	481	6542	4406	6850	6688	7541	3633	295	362	583	495	356	219
PCHAS_0211700	173	195	288	264	170	103	92	91	112	95	42	100	45	3	106	191	178	54	176	159	1091	975	767	613	812	1228	1024	856	599	768	834	560	192	239	310	201	332	168	269	113	368	767	1238	863
PCHAS_0211800	1001	1140	1661	1544	915	476	318	486	650	165	207	1162	985	28	952	1504	1240	473	1012	984	2132	4326	3677	3353	4040	3070	2642	2458	1649	2780	1364	1311	712	889	1181	2497	2915	2530	3067	2133	4199	7173	3292	4098
PCHAS_0211900	519	554	800	766	410	178	136	77	204	110	52	509	501	14	515	747	603	254	545	436	1530	1978	1680	1312	1604	1451	1594	1151	1158	1292	883	728	181	247	260	713	811	944	1590	1380	2980	2820	2316	2436
PCHAS_0212000	682	944	1140	1039	759	464	443	629	770	266	223	606	328	27	479	745	616	269	544	752	995	1487	1428	1544	1906	1897	1940	1493	1020	2199	1303	1131	904	865	1339	1056	1513	826	510	357	925	2097	1317	1620
PCHAS_0212100	420	570	809	669	418	326	260	310	297	170	82	205	28	11	178	267	230	86	392	433	641	670	578	979	1210	1645	1673	1292	802	1898	1364	1205	397	437	722	498	750	335	69	59	151	435	511	547
PCHAS_0212200	254	259	410	321	205	127	76	104	154	52	52	305	60	7	111	211	157	67	205	193	400	426	299	538	768	857	952	812	491	1026	856	704	575	436	929	1758	1295	682	79	127	200	286	405	347
PCHAS_0212300	9	5	8	3	0	1	2	1	1	3	5	29	7	1	12	22	18	10	6	2	27	53	22	41	21	46	20	11	6	9	13	30	37	27	47	79	86	46	7	12	11	24	44	6
PCHAS_0212400	91	79	46	42	15	21	21	29	41	15	34	101	55	20	92	151	180	90	45	50	59	167	127	231	169	166	65	80	61	82	111	69	179	215	263	261	329	171	28	48	58	154	110	77
PCHAS_0212500	137	163	245	201	136	84	89	84	127	70	28	75	15	1	44	72	91	35	110	142	529	327	264	312	367	683	717	546	340	673	612	466	136	156	197	174	251	120	88	46	113	237	431	323
PCHAS_0212600	586	556	1029	852	514	250	137	310	448	105	133	309	97	5	199	426	275	109	408	485	869	1825	1366	2094	2477	2105	2077	1642	1134	2325	1034	1106	738	659	1080	791	1212	549	238	114	383	1644	915	1261
PCHAS_0212700	1336	1618	2114	1901	1311	835	778	959	1150	511	293	643	326	27	515	1014	857	332	897	1204	3002	3359	3125	3753	5109	6451	6388	5469	3248	7001	5684	4069	1735	2173	3078	1871	2729	1394	876	580	1570	3676	3574	3685
PCHAS_0212800	3185	3964	3423	3754	3558	3050	2515	4341	5068	1348	1469	4279	448	62	1154	559	653	277	710	2068	999	909	685	2983	5564	6654	10735	7880	3925	19365	12755	9363	9290	9795	14334	22738	21337	14901	1906	2655	2882	1697	1546	1132
PCHAS_0212900	245	290	306	264	266	398	394	597	632	340	330	1518	102	15	311	222	229	104	148	198	703	461	413	420	579	818	1257	931	566	1660	4787	1257	3331	2351	4961	6353	6025	3441	956	784	1409	594	1674	578
PCHAS_0212920	0	2	1	1	0	1	1	5	7	1	1	12	1	1	3	3	2	1	2	0	3	2	3	2	1	1	7	3	4	8	29	1	20	17	20	84	50	27	14	16	13	1	13	6
PCHAS_0212940	1	0	1	1	3	1	1	0	1	1	2	1	1	0	1	1	3	0	1	0	2	6	10	3	1	2	10	5	2	6	9	0	2	2	3	14	13	5	10	7	10	9	15	6
PCHAS_0213000	1638	2055	1892	1967	1610	1478	1366	2504	2716	911	799	1755	687	45	1253	1400	1262	528	1180	1384	2528	4772	3942	4484	5870	4466	4867	4082	2273	7889	6410	4491	5518	6517	8428	5785	8917	5160	1534	1146	2554	7075	3240	4537
PCHAS_0213100	894	640	195	227	371	3670	3482	7969	8866	4179	5625	16165	550	120	2912	702	1145	374	159	433	1055	910	616	472	456	566	643	574	366	2682	38156	4278	47444	48140	58433	31637	42392	24598	1865	3043	3213	1750	4388	1552
PCHAS_0213200	5289	6770	9115	8601	5330	3255	3234	3958	5094	2035	1788	9246	5448	172	5706	7218	6207	2696	4825	6096	25830	30313	27357	23752	26981	37025	31098	25940	18821	27596	27473	17155	13376	13215	18904	28113	30506	25980	16494	11634	29932	41207	39793	38705
PCHAS_0213300	804	791	649	597	512	2504	2221	5271	4713	3021	4006	16299	551	97	3133	730	1127	382	332	550	1259	820	577	629	851	1170	1389	1167	703	1848	19867	2521	34544	31288	36495	31022	37497	22473	3035	4546	4881	1753	4064	1463
PCHAS_0213400	503	633	507	480	402	872	948	1680	1846	1010	1152	3678	266	72	1014	758	967	454	412	398	1117	1097	789	780	1119	1452	1400	1205	862	1667	8879	1540	8995	7820	11557	7056	9320	4570	675	812	1147	1012	2093	1133
PCHAS_0213500	1153	1346	1718	1707	1110	695	709	692	900	476	262	2158	840	35	1178	1191	911	458	849	1077	2973	3088	2556	2427	3092	4499	4161	3712	2256	4044	4219	2744	1331	1666	2157	12472	8595	7688	2728	2902	4158	3782	5751	3796
PCHAS_0213600	188	170	259	248	118	56	41	29	26	53	71	2159	1464	31	1338	756	687	401	262	216	2216	1937	1717	826	789	944	651	638	536	375	429	288	307	189	377	11053	8273	7825	5074	4208	7061	3954	7393	3679
PCHAS_0213700	111	98	166	176	80	53	49	78	73	56	52	995	118	19	344	164	180	95	140	90	553	423	393	351	460	482	425	376	236	304	1017	254	2790	1344	3282	10547	7569	5069	589	1123	1274	700	1600	616
PCHAS_0213800	4	9	9	12	1	6	1	1	7	2	4	39	28	0	13	20	6	5	15	7	110	97	91	67	59	76	54	64	38	59	92	30	61	40	79	488	397	288	211	226	382	205	348	144
PCHAS_0213821	175	204	180	183	134	301	274	439	721	199	393	675	48	13	85	54	78	31	73	121	226	320	177	375	635	1127	1664	1271	567	3047	3503	1704	2801	2231	4624	2960	4217	1670	117	133	311	188	508	230
PCHAS_0213841	25	23	24	17	11	49	33	80	244	25	202	384	24	4	23	16	16	3	13	15	17	21	4	11	20	25	44	36	12	39	102	58	283	166	335	355	233	183	12	10	42	10	40	16
PCHAS_0213861	26	24	6	6	7	34	27	53	111	28	99	226	18	1	25	16	19	8	5	16	8	12	6	0	4	12	13	15	4	20	60	24	134	151	275	253	147	144	9	15	23	9	16	7
PCHAS_0213881	31	16	6	12	8	5	1	5	7	6	20	657	273	7	279	102	61	60	12	22	294	230	201	92	61	59	35	38	43	18	37	12	100	35	156	4092	2945	3131	1405	1439	1814	621	1654	583
PCHAS_0300100	258	355	523	430	234	129	99	96	131	73	41	310	584	4	448	604	598	209	490	354	141	133	107	58	96	108	78	72	62	38	65	39	25	39	34	52	64	51	65	38	59	174	181	141
PCHAS_0300200	0	0	1	1	0	5	1	3	3	1	1	5	1	0	1	0	0	0	0	1	1	7	2	1	4	6	7	8	3	16	67	18	85	45	78	44	69	28	7	2	2	2	10	0
PCHAS_0300300	0	1	0	0	0	1	0	2	4	1	1	8	0	0	0	0	0	0	0	0	1	0	2	0	1	2	2	1	0	15	9	2	19	29	40	45	54	13	1	0	5	3	3	2
PCHAS_0300400	3	3	3	5	3	7	2	15	14	5	6	14	2	0	1	0	0	0	0	1	106	145	69	90	152	244	671	337	172	1082	1435	642	1194	699	1674	997	1375	717	66	56	106	111	153	106
PCHAS_0300600	0	1	0	1	1	0	2	2	5	3	0	1	0	0	0	0	1	0	2	0	28	19	24	15	20	34	35	28	17	40	73	32	35	32	41	27	45	19	13	19	26	26	30	30
PCHAS_0300700	152	183	210	192	155	168	157	218	302	105	103	250	49	5	99	113	123	50	77	126	10	11	6	6	5	13	17	11	7	19	27	14	9	18	18	11	22	10	2	1	7	6	13	10
PCHAS_0300800	33	31	28	25	36	93	49	123	181	46	31	121	6	0	15	10	4	4	5	13	5	1	4	0	2	3	8	1	2	21	35	12	33	17	64	24	50	20	1	0	2	6	3	3
PCHAS_0300900	110	98	18	15	39	615	508	982	1188	693	431	1281	51	8	182	35	67	31	9	33	1	1	3	1	0	5	0	0	1	5	29	8	62	54	110	50	62	28	2	3	4	3	12	6
PCHAS_0301000	401	499	471	381	402	762	742	1212	1443	640	566	1260	64	9	289	147	172	53	192	273	31	30	15	22	32	58	97	76	35	179	366	101	219	181	355	218	354	164	15	12	19	20	45	20
PCHAS_0301100	67	62	15	13	38	424	376	894	1026	370	413	1285	39	7	155	32	66	21	17	24	1	4	1	1	0	3	4	1	1	9	94	14	171	109	214	69	155	79	4	2	4	3	13	3
PCHAS_0301200	111	62	23	28	43	553	394	1015	1247	388	500	1932	45	4	208	64	77	34	18	33	2	2	0	2	3	4	3	0	1	3	11	3	20	8	41	19	27	14	3	3	2	1	8	2
PCHAS_0301300	0	0	0	0	0	0	0	0	0	0	0	0	0	0	0	0	0	0	0	0	0	0	0	0	0	1	0	0	0	0	0	0	0	0	0	0	0	0	0	0	0	0	0	0
PCHAS_0301400	901	1702	1166	1121	1248	799	693	952	1081	410	154	252	29	7	104	134	145	54	250	782	65	91	53	152	261	571	609	582	214	953	498	368	80	166	157	92	190	71	18	18	27	73	91	58
PCHAS_0301500	311	506	471	391	412	326	330	405	524	222	106	231	33	5	52	112	118	33	189	275	71	76	43	101	132	300	275	254	107	347	376	181	78	115	120	76	120	43	17	15	29	54	128	55
PCHAS_0301600	531	869	339	434	601	1088	1174	1752	2018	747	452	929	36	7	202	81	125	47	148	273	72	86	49	46	114	213	541	315	118	1182	1830	691	1230	1219	1813	989	1597	704	46	80	96	73	152	66
PCHAS_0301700	2070	3989	2146	2441	2839	2354	2512	3363	4421	1506	893	1431	118	20	378	226	335	177	468	1628	20	17	10	31	53	115	152	169	67	200	262	132	117	115	182	97	160	53	5	4	19	11	37	20
PCHAS_0301800	96	118	20	16	50	517	463	875	983	353	380	1057	31	4	125	38	58	39	11	23	0	0	0	2	0	2	0	0	0	1	30	4	34	30	31	16	23	12	1	0	3	1	4	1
PCHAS_0301900	940	1744	813	1012	1239	1119	1023	1397	1859	521	354	526	31	8	124	73	107	74	145	663	13	8	5	9	7	29	23	28	15	34	35	22	15	16	12	15	20	7	6	3	8	6	26	9
PCHAS_0302000	517	864	533	600	686	491	502	500	699	256	101	148	25	5	56	71	52	38	90	360	9	11	8	9	25	25	34	37	26	68	59	42	24	37	44	25	19	12	2	4	13	11	12	12
PCHAS_0302050	690	959	1022	916	768	755	853	1265	1465	596	447	827	158	14	356	420	422	142	470	632	32	44	38	37	58	93	80	59	39	117	125	86	70	73	139	46	87	44	6	9	21	46	45	34
PCHAS_0302100	93	99	18	20	53	590	486	984	968	574	384	1025	31	10	182	26	65	35	13	35	2	4	3	1	1	0	3	4	2	9	72	13	172	113	129	128	152	54	9	6	15	2	6	5
PCHAS_0302300	97	79	118	88	74	126	89	197	304	69	82	387	33	6	63	30	27	16	17	54	68	43	34	55	78	109	286	153	73	478	854	378	541	444	720	729	904	469	56	65	103	47	130	36
PCHAS_0302400	380	348	119	128	220	1365	1329	2579	3089	1466	1537	4509	172	27	774	222	345	116	64	166	336	280	191	151	175	246	390	247	141	1817	10515	1725	8748	7425	12511	5940	8602	4597	510	608	914	392	1246	416
PCHAS_0302500	458	410	167	163	240	1697	1692	2889	3421	1742	1921	6156	222	56	1127	278	473	162	110	224	567	348	270	190	188	292	511	306	187	1645	11732	1820	10183	9846	13150	8500	12982	6930	946	1278	1656	505	1799	535
PCHAS_0302700	43	29	43	48	32	29	27	54	62	25	16	21	2	1	5	6	2	1	10	32	30	25	23	43	74	118	186	142	63	313	356	156	153	172	200	124	187	89	10	12	11	23	35	32
PCHAS_0302800	6642	10234	8934	9044	8248	6778	8257	8507	10137	5795	2628	4506	456	92	1625	1259	1570	530	2437	5672	4176	3282	2196	7197	15015	24727	31944	26329	13552	39681	39787	26190	13310	20835	22112	9718	17239	8646	973	1357	1701	2211	3292	2866
PCHAS_0302900	398	493	452	372	240	155	88	171	274	78	122	709	218	34	350	726	637	349	253	269	632	753	668	862	990	1106	965	831	558	852	744	498	1666	932	1552	2923	2396	1367	210	186	429	856	706	706
PCHAS_0303000	394	276	722	566	366	206	124	240	485	83	124	383	70	2	89	192	119	36	184	268	1022	886	848	1288	1768	2804	2982	2381	1567	3661	3451	2129	1263	1195	2082	1330	1795	794	148	158	328	682	934	998
PCHAS_0303100	107	108	193	164	122	91	77	97	114	54	33	84	6	2	16	31	18	6	57	87	138	69	53	158	262	407	536	423	202	578	579	380	165	157	303	215	350	149	14	13	52	47	86	56
PCHAS_0303200	637	862	1002	1008	639	331	240	473	640	122	147	957	167	14	358	432	368	161	462	602	791	1891	1168	1921	3255	1983	2030	1813	1388	2543	1380	1196	1622	1506	1849	9762	6590	6101	654	824	1481	2005	775	1285
PCHAS_0303300	624	717	919	809	560	444	373	502	623	239	234	677	201	17	379	532	407	176	448	556	1341	2313	1574	1541	1837	1822	2289	1503	1259	2717	1870	1487	1238	1028	1692	1652	2438	1390	991	819	1641	2244	1468	1783
PCHAS_0303400	247	198	427	309	234	241	147	269	437	126	125	361	55	6	77	111	80	37	123	162	450	509	303	429	560	1069	1243	818	515	1440	1715	1043	846	661	1025	951	1362	586	118	107	201	297	580	435
PCHAS_0303500	832	1160	593	650	763	1267	1636	2057	2286	1567	943	2359	194	56	800	497	727	399	228	440	400	505	255	314	500	1195	2142	1382	666	3782	7890	3166	4505	3642	6985	4580	6438	3030	367	348	505	274	1016	306
PCHAS_0303520	1	3	0	0	2	0	0	0	1	0	1	1	0	0	0	0	1	0	2	0	0	2	1	1	1	0	0	2	2	1	0	0	3	1	0	3	1	0	0	0	2	1	1	2
PCHAS_0303600	477	611	727	664	563	397	319	448	577	219	138	261	34	6	95	96	98	25	178	375	331	161	129	649	1216	1934	2755	2158	1151	3433	2896	2045	952	1049	1482	1032	1607	705	80	91	161	151	280	186
PCHAS_0303700	635	858	1126	1005	640	345	308	342	522	191	120	825	749	18	752	1073	901	390	657	793	1383	3376	1936	1886	2374	1840	1760	1424	1048	1732	977	828	462	603	646	1466	1528	1621	1600	1385	2639	4379	2156	2451
PCHAS_0303800	480	875	298	160	73	101	61	89	142	55	135	813	350	161	861	1960	1950	1225	361	155	87	90	127	153	64	244	122	85	59	176	134	153	115	121	388	484	293	169	78	100	112	89	157	65
PCHAS_0303900	114	62	168	118	91	93	54	88	210	31	62	189	13	1	25	17	10	7	30	43	106	85	40	151	292	518	1112	761	351	1848	1736	1173	888	681	1268	865	1380	522	43	55	84	70	122	58
PCHAS_0304000	20	9	15	8	10	15	17	24	31	12	15	50	4	2	18	22	18	14	10	8	22	38	32	35	40	58	15	28	17	54	85	34	120	94	149	167	245	109	11	10	21	24	21	17
PCHAS_0304100	702	813	1178	997	685	515	418	782	958	195	260	853	78	10	240	268	230	90	332	617	599	624	581	1930	2803	2831	2974	2424	1513	4123	3223	2043	3685	2830	4332	4922	5420	2702	277	344	652	587	523	567
PCHAS_0304200	752	912	973	826	744	607	485	752	1005	359	306	1131	271	41	535	874	724	362	441	509	1657	1286	1268	1392	1811	3522	3925	2961	1886	5076	6322	3365	2345	2429	3830	5650	5075	3248	849	939	1596	1299	2523	1920
PCHAS_0304300	58	32	28	21	16	10	3	15	14	5	16	55	31	4	41	59	65	35	14	19	52	182	134	123	92	110	54	28	30	57	35	35	92	63	126	185	208	119	21	38	56	124	83	59
PCHAS_0304400	11	13	9	9	8	2	2	2	4	2	6	35	14	3	19	35	18	9	10	7	27	57	56	46	33	49	19	18	15	24	23	15	20	19	36	43	44	28	11	7	17	48	65	32
PCHAS_0304500	514	465	892	730	462	318	216	344	535	179	162	608	343	8	298	549	369	151	357	436	2147	2846	2290	1840	2354	3343	3090	2462	1797	3185	3223	2150	1102	1077	1742	1667	2372	1640	1797	1069	2450	3142	3466	3052
PCHAS_0304600	218	226	405	350	193	77	36	59	67	20	16	39	36	2	44	141	105	41	181	186	464	837	718	1055	1312	1079	1161	883	650	1035	363	465	127	158	230	218	271	106	104	42	181	715	444	587
PCHAS_0304700	6808	8483	11325	9735	6394	4285	3904	4927	5713	3094	1796	4731	2290	150	3815	6382	5826	1952	6369	6853	21762	23125	20748	19677	24080	34834	28750	24943	17254	26847	28759	19467	11694	13117	18250	15583	20546	11157	7002	4868	14054	23713	26295	25130
PCHAS_0304800	150	183	271	215	122	54	54	37	70	27	23	50	20	7	50	123	114	38	123	135	353	489	364	497	783	762	689	607	386	590	374	353	86	109	175	155	207	97	30	17	60	287	296	356
PCHAS_0304900	320	256	748	472	290	170	103	158	256	64	66	167	56	4	61	167	132	38	200	238	989	1185	919	1241	1709	2466	2268	1902	1220	2242	1741	1458	465	540	884	544	798	365	98	50	179	681	885	943
PCHAS_0305000	5	8	9	4	2	0	0	1	0	0	1	2	9	0	6	12	10	4	11	4	33	185	98	44	31	37	29	27	10	14	20	19	12	15	13	13	14	6	4	8	22	72	94	32
PCHAS_0305100	20	11	13	8	6	3	5	2	2	4	3	31	9	4	24	38	59	36	12	11	14	51	28	25	38	69	12	19	15	27	6	16	33	20	53	50	69	35	3	4	4	11	31	4
PCHAS_0305200	16	9	10	4	3	4	0	3	1	2	4	24	9	5	14	36	30	15	9	1	26	44	41	51	47	77	40	28	22	32	14	30	53	39	54	72	84	42	14	11	22	29	51	18
PCHAS_0305300	430	589	795	670	415	277	283	325	383	204	113	285	106	8	215	357	333	121	390	439	1947	1408	1441	1371	1697	3156	2655	2130	1674	2522	2635	1753	740	663	1148	835	1287	488	331	215	759	1168	2199	1878
PCHAS_0305400	760	834	1284	1085	764	484	388	579	738	355	268	680	288	20	350	720	474	182	624	711	3005	3297	2257	1992	2585	4377	3665	2843	1983	3402	4589	2566	1649	1296	2896	1354	2013	1077	798	334	1072	2370	3728	2876
PCHAS_0305500	347	372	439	443	343	315	309	421	558	172	185	529	38	3	86	82	117	38	99	272	489	375	321	868	1396	2449	2682	2157	1262	3852	4630	2041	2812	2332	3964	2441	3364	1498	160	229	316	262	552	354
PCHAS_0305600	373	417	588	518	339	251	234	301	322	180	110	251	74	5	171	309	237	101	298	370	1011	1205	804	771	1118	1482	1459	1206	824	1510	1482	1066	555	579	822	667	980	420	412	248	479	1005	1213	948
PCHAS_0305700	26	25	33	22	20	69	53	120	152	52	101	498	19	2	75	27	32	12	14	22	43	35	36	34	37	73	53	41	39	103	804	79	892	458	1368	916	1006	494	63	68	136	31	193	48
PCHAS_0305800	3896	4391	6408	5076	3762	2981	2632	4219	5140	2039	1761	4142	499	70	1356	1754	1685	492	2383	3198	5506	5960	4799	7808	12074	15123	15536	13769	7929	18573	19867	11503	11479	12304	17839	10787	14806	7497	1203	1408	2682	4534	4879	5314
PCHAS_0305900	961	1360	1560	1465	1044	560	638	849	940	319	256	625	384	21	583	934	811	335	788	973	1412	2717	2098	2848	3574	3442	3014	2752	1820	3645	2267	1860	1491	1492	2185	1658	2345	1226	593	411	1160	2902	1626	2443
PCHAS_0306000	170	222	283	237	182	103	115	94	160	68	34	122	57	4	90	197	155	78	145	169	825	750	575	613	806	1346	1214	962	727	1174	1223	829	285	315	526	288	472	249	151	91	231	640	967	837
PCHAS_0306100	56	52	40	33	19	11	4	19	13	15	20	386	52	7	139	102	111	38	35	27	145	198	147	155	133	194	97	93	80	74	109	82	585	290	663	3746	2244	1811	315	457	510	222	490	170
PCHAS_0306200	266	301	517	428	266	98	75	63	48	46	22	68	18	5	57	133	106	36	185	241	431	358	377	1046	1503	1473	1294	1139	759	1199	577	609	142	178	229	471	479	193	62	64	147	302	245	324
PCHAS_0306300	364	439	628	622	409	155	146	159	186	112	86	399	349	6	263	420	378	128	300	411	1931	2437	2497	2327	2700	3259	2729	2439	1697	2313	1800	1462	476	563	801	1561	1842	1512	1380	936	2580	3461	3192	3188
PCHAS_0306400	108	115	222	212	92	46	29	21	43	22	15	97	113	3	98	163	109	49	105	109	540	765	493	372	475	656	564	452	373	374	343	269	45	67	88	147	202	173	560	284	572	710	972	667
PCHAS_0306500	463	433	897	720	432	182	107	125	188	115	38	210	185	7	191	450	331	101	352	438	1939	1602	1573	1674	1949	3386	2611	2272	1548	2248	1691	1334	228	313	468	532	627	405	724	359	1368	1833	2525	1946
PCHAS_0306600	699	855	701	662	666	1203	1545	2195	2283	1693	979	3073	271	43	902	450	541	183	294	492	1109	1425	844	766	1156	1667	2549	1806	983	4183	10883	3445	8185	7584	11886	8653	10184	5613	1074	1102	1765	1300	2471	1213
PCHAS_0306700	539	635	764	761	479	307	234	365	491	146	147	1376	164	32	462	418	358	165	308	437	697	750	797	1255	1633	1696	1894	1436	1066	2100	1742	1102	1661	1071	2008	10106	5998	3303	498	744	986	851	995	748
PCHAS_0306800	115	131	178	174	111	65	70	60	120	57	30	67	7	0	31	45	33	13	44	90	284	243	208	228	345	739	857	631	420	835	761	538	224	176	311	199	264	130	13	16	29	105	264	224
PCHAS_0306900	2	0	0	1	0	0	0	3	1	1	1	3	0	0	2	3	1	1	0	0	0	2	1	1	6	3	2	6	3	4	6	1	10	6	7	8	8	2	2	3	4	4	4	0
PCHAS_0307000	92	66	13	36	32	273	158	654	568	188	517	3417	112	20	497	122	134	54	16	43	222	141	118	78	81	39	54	26	36	139	2514	221	9847	6846	10779	11751	11575	6947	594	1006	1170	564	601	292
PCHAS_0307100	1048	1488	1657	1737	1028	958	834	1247	1296	708	829	4121	746	63	1711	1447	1408	602	1008	1376	4746	4815	4673	5146	7415	8271	6050	5814	4232	5037	12836	3477	20690	15596	21318	44890	33627	25989	3845	5286	8607	7045	8890	6944
PCHAS_0307200	497	360	75	230	200	1335	1112	3117	2181	1848	1881	22291	866	229	4962	997	1403	605	144	394	3522	1542	1556	833	759	644	492	417	484	489	37935	1219	93504	67634	99054	140959	125232	88725	8893	16287	21165	7304	15556	4947
PCHAS_0307300	427	442	349	349	315	785	622	1534	1151	976	1105	10321	433	92	2143	454	629	264	154	338	1731	921	824	502	745	821	930	828	534	1164	23552	1386	53042	38560	54064	67826	63330	43929	4739	8420	11065	3788	7308	2648
PCHAS_0307400	1098	1375	1373	1184	1248	1078	1144	1669	1949	748	589	1173	120	14	319	188	209	77	236	720	380	401	247	616	1468	2016	3910	2865	1431	6254	5280	3260	3002	3461	4884	3159	5015	2373	386	533	722	483	498	380
PCHAS_0307500	262	298	445	348	223	155	115	150	189	62	61	423	313	8	252	427	279	147	216	273	1022	1647	1226	1052	1221	1669	1136	1079	701	1095	779	693	347	330	588	877	1100	1031	980	653	1540	1889	1825	1791
PCHAS_0307600	291	314	497	426	299	128	98	143	152	65	41	176	133	1	150	283	200	91	223	237	785	931	1021	1342	1655	1675	1587	1382	951	1597	1071	825	308	329	503	748	953	581	486	245	790	1354	1078	1216
PCHAS_0307700	191	171	402	288	163	87	47	71	74	38	25	66	16	4	34	71	55	21	113	134	284	275	179	698	953	778	949	734	520	1062	639	522	120	155	255	388	455	241	109	86	155	244	184	207
PCHAS_0307800	265	239	466	363	232	119	82	109	137	67	38	104	40	6	84	202	162	53	222	206	1079	1193	812	827	1146	1401	1346	1063	769	1171	1135	874	261	324	415	271	458	177	63	77	173	678	1026	933
PCHAS_0307900	118	120	219	208	121	145	114	171	239	99	102	320	25	7	61	50	46	17	51	85	258	212	153	302	404	659	911	639	427	1012	1580	807	1208	863	1653	1160	1660	863	56	101	186	136	281	215
PCHAS_0308000	370	413	627	506	353	245	192	193	311	147	75	170	53	8	123	273	190	83	262	303	934	1103	671	786	1287	1804	1692	1521	961	1655	1393	1116	378	497	583	342	560	299	156	92	230	749	958	852
PCHAS_0308100	196	220	366	328	198	123	86	124	209	71	47	102	50	4	63	138	94	35	116	176	832	918	668	725	1004	1704	1756	1364	849	1675	1714	1135	376	452	646	324	562	290	133	92	278	650	925	833
PCHAS_0308200	137	67	73	65	31	15	6	10	19	8	22	147	54	7	108	158	179	79	54	38	74	138	186	176	218	224	138	127	69	139	51	104	418	349	497	868	1033	597	84	97	124	256	90	77
PCHAS_0308300	38	9	4	6	4	1	4	1	3	1	6	49	14	2	31	51	37	26	8	5	23	78	54	81	95	95	46	27	23	43	16	32	220	164	254	337	425	271	56	90	53	120	36	27
PCHAS_0308400	1049	1166	1940	1665	968	481	423	421	610	295	146	369	207	16	390	965	849	305	1020	1049	3039	2947	2651	2967	3669	4413	3944	3339	2430	3570	2604	2114	579	746	1079	723	1157	571	593	325	1255	2620	2821	3297
PCHAS_0308500	554	662	995	807	543	317	327	230	348	264	111	222	127	12	240	502	415	148	523	562	1720	1514	1205	1203	1684	2696	2396	1913	1391	1977	1911	1375	402	519	732	422	695	348	283	167	518	1263	2136	1707
PCHAS_0308600	271	318	504	417	252	128	123	114	189	88	55	117	37	3	61	151	118	31	170	272	584	568	398	612	1193	1389	1612	1435	813	1393	1171	868	269	408	404	209	378	203	80	56	133	402	443	517
PCHAS_0308700	583	790	1154	940	677	301	305	239	325	172	82	156	59	5	118	293	259	68	413	602	1019	873	626	1176	2213	2885	2870	2666	1459	2707	1944	1659	446	697	742	392	618	329	112	87	207	548	723	672
PCHAS_0308800	5	4	9	6	7	0	1	0	2	2	1	2	0	0	3	6	3	0	5	2	16	18	6	13	14	28	24	17	19	24	21	15	4	5	4	10	10	5	2	3	9	4	15	14
PCHAS_0308900	22	12	8	7	10	44	39	91	97	51	89	755	27	3	127	41	41	20	6	8	110	47	73	25	23	31	25	18	16	41	1518	67	2897	1757	3762	5382	4406	2633	381	626	731	201	587	155
PCHAS_0309000	2936	3260	5481	4412	2743	1743	1413	1816	2423	892	658	1815	1374	51	1426	2605	2170	799	2403	2742	7219	12206	9602	9772	13048	14265	13161	11810	7286	14321	9608	7804	3992	4553	6917	4561	6703	4018	4181	2431	6464	13989	8926	10969
PCHAS_0309100	1180	1439	1735	1464	1119	1031	931	1413	1773	933	672	2058	316	47	738	1098	985	446	821	1019	3160	3266	2502	2470	3131	6017	5327	4090	2662	5813	11002	4314	5121	3419	8021	4839	6514	3203	849	523	1183	2080	4015	2819
PCHAS_0309200	3032	3910	5324	4460	2942	2035	2390	2298	2728	2121	895	2445	1530	89	2575	3361	3340	1396	3414	3335	14094	17087	10702	7670	10640	15158	11914	10110	8142	10669	12510	8187	4075	3888	6709	5101	7114	4352	6938	3770	8191	14708	17952	13549
PCHAS_0309300	479	472	326	356	399	729	678	1719	1684	426	731	2659	160	32	462	313	391	136	142	173	521	549	411	399	483	502	974	725	298	2435	4541	1555	8563	6951	9050	8604	10923	5620	785	1130	1517	841	1181	688
PCHAS_0309400	368	402	521	502	341	292	252	392	542	221	171	438	56	7	134	176	150	45	167	270	1005	614	623	896	1248	2301	2471	1930	1326	3004	4146	2053	1443	1416	2199	1329	1934	833	146	158	324	502	990	872
PCHAS_0309500	417	570	880	687	474	345	347	306	446	245	112	210	44	10	93	155	138	44	325	391	943	705	480	859	1354	2434	2526	1971	1338	2547	2327	1832	652	772	960	604	999	480	76	52	127	302	607	516
PCHAS_0309600	213	228	372	318	189	87	50	76	99	28	19	62	30	4	82	186	134	45	177	193	466	573	607	910	1039	889	832	681	481	849	427	356	179	155	271	675	562	207	90	97	186	654	418	578
PCHAS_0309700	11	7	6	3	3	3	4	9	6	5	13	605	65	2	119	32	25	16	3	6	120	57	85	39	30	38	18	22	11	15	156	15	590	161	938	6808	3675	2429	319	438	660	173	752	147
PCHAS_0309800	87	49	171	130	47	29	15	18	58	7	10	170	69	3	52	139	90	40	73	54	1077	977	932	779	956	1277	1180	899	756	891	785	583	252	207	425	2220	1169	707	314	307	614	843	1367	1122
PCHAS_0309900	11	20	60	30	26	6	7	3	7	2	1	16	20	0	17	22	23	7	21	20	437	252	424	441	401	612	544	415	361	388	253	238	30	29	60	80	108	36	81	43	206	343	577	439
PCHAS_0310000	1560	2191	2296	2088	1472	1173	1105	1649	1619	798	733	2673	751	65	1308	1617	1577	805	1285	1555	4160	5415	3725	3914	5182	5395	6125	4603	2912	6448	6857	3950	4070	3767	6274	6778	8689	4684	4883	2759	7078	7213	6158	5216
PCHAS_0310100	83	107	131	145	71	39	33	37	59	13	25	69	5	4	29	58	37	25	40	72	272	238	280	553	803	868	853	731	435	799	645	498	170	200	261	246	356	184	49	35	92	203	211	225
PCHAS_0310200	238	283	357	343	220	247	224	324	511	188	165	459	32	4	95	92	105	50	141	237	768	459	388	641	892	1761	2006	1419	902	2333	3748	1563	1702	1139	2435	1805	2145	979	98	129	262	255	751	383
PCHAS_0310300	341	392	665	526	376	238	247	258	401	195	103	241	35	5	106	197	165	56	265	302	1032	670	634	817	1225	1968	1946	1566	947	1997	2521	1400	695	645	1125	741	1200	507	89	75	205	473	950	824
PCHAS_0310400	5	1	3	1	1	2	3	2	4	2	0	2	1	1	3	2	2	5	0	0	5	8	3	6	7	17	12	12	8	13	13	16	11	12	14	4	9	8	1	1	1	8	8	9
PCHAS_0310500	174	191	152	169	171	153	160	281	399	85	94	209	33	4	67	65	61	20	28	96	37	55	25	83	134	240	534	305	149	973	731	525	576	536	880	765	930	432	35	61	75	58	76	42
PCHAS_0310600	51	45	67	45	40	41	22	33	69	20	9	56	4	1	8	14	11	1	13	26	70	44	21	68	155	305	567	335	194	802	951	552	240	210	439	245	419	182	24	16	35	16	88	25
PCHAS_0310700	541	712	909	878	609	370	342	444	604	214	149	280	48	6	149	271	276	69	355	561	676	842	664	1177	1640	1921	2212	1676	1075	2686	1499	1248	677	670	1174	686	1147	534	89	64	138	509	450	726
PCHAS_0310800	1968	2515	3330	2774	2067	1234	1216	1273	1481	885	359	729	344	38	674	1140	1078	386	1390	1869	3135	4104	3085	4030	5814	7437	7837	6700	4254	7627	5290	4887	1539	2304	2402	1527	2420	1253	614	479	1182	3141	3268	3658
PCHAS_0310900	181	294	295	248	148	91	95	118	154	77	51	142	39	13	112	242	223	93	173	166	358	369	243	376	603	830	763	615	466	652	563	477	255	245	462	278	334	143	26	26	45	186	232	247
PCHAS_0311000	65	59	101	93	54	51	44	60	115	36	32	157	13	0	24	28	17	10	33	60	208	113	100	236	363	678	694	575	362	756	1238	564	752	669	1028	657	856	451	51	83	105	77	216	116
PCHAS_0311100	254	284	223	213	285	273	244	432	521	138	186	514	20	3	96	39	49	22	46	115	59	49	39	105	196	287	767	518	233	1604	1477	782	1294	1035	1935	1269	1646	759	56	90	133	82	81	82
PCHAS_0311200	593	699	1087	874	621	400	423	500	622	306	185	339	74	9	168	219	211	74	346	527	860	854	585	1118	1641	2606	2565	2157	1344	2762	2579	1740	850	802	1497	782	1243	597	111	90	252	592	805	775
PCHAS_0311300	1555	1928	2463	2302	1497	1042	1063	1149	1476	745	472	1276	666	27	968	1542	1362	499	1310	1562	5779	6588	4868	4592	6186	9227	7589	6484	4432	6926	8496	4774	3061	2907	4744	3593	4786	2755	2519	1659	4009	6097	8136	6954
PCHAS_0311400	507	591	763	732	517	379	294	611	613	212	247	839	273	11	345	508	454	173	437	472	1731	3040	2816	3267	4707	4008	3253	3175	2066	3956	3736	2129	4789	4199	5368	4512	5988	2987	1179	943	2168	4432	2251	2974
PCHAS_0311500	1052	1326	1482	1367	1040	797	737	1666	1669	356	690	2248	586	25	878	1047	1034	406	767	1030	1909	2676	3212	4361	4448	4236	3309	3090	2129	4415	5025	2369	7705	6192	9713	7831	9788	4769	1320	1087	3021	5543	2766	3711
PCHAS_0311600	12	10	5	7	5	6	3	13	6	5	20	724	109	13	282	52	48	49	4	8	87	54	60	25	20	28	32	24	15	19	47	17	174	71	245	4448	2138	1895	354	591	542	148	574	140
PCHAS_0311700	164	201	290	229	172	122	105	128	201	66	60	123	16	2	38	48	41	16	77	116	385	247	157	461	692	1387	1632	1145	752	1678	1778	1102	487	416	813	538	852	338	38	24	74	113	282	214
PCHAS_0311800	344	478	667	559	401	278	319	376	449	236	136	232	38	10	78	129	161	52	258	301	823	357	351	666	965	2067	2268	1714	1180	2374	3069	1645	855	941	1383	955	1461	641	116	119	224	301	631	407
PCHAS_0311900	641	862	1276	1114	668	339	299	287	371	194	88	413	332	18	437	808	616	236	555	686	1753	2118	1795	1687	1744	2651	2358	1757	1262	2074	1356	1257	289	315	592	880	969	561	1001	550	1589	2229	2583	2125
PCHAS_0312000	216	152	356	313	192	110	51	82	123	47	40	80	15	0	41	106	59	25	137	150	650	548	406	525	721	1112	1116	845	584	934	988	627	163	212	282	204	302	140	66	37	126	344	555	433
PCHAS_0312100	1251	1558	2105	1835	1165	764	888	728	1042	632	330	646	321	32	568	1138	1045	389	1288	1241	4204	3288	2928	3265	3653	5921	4821	4236	3034	4122	5192	3133	1299	1252	2131	1419	2122	977	767	385	1649	3089	4893	3971
PCHAS_0312200	169	210	382	293	174	99	90	81	114	89	40	65	25	2	54	108	101	30	152	184	568	528	293	449	684	1058	955	805	531	788	714	537	148	166	231	172	221	120	47	34	95	240	495	345
PCHAS_0312300	155	219	298	259	145	105	108	79	90	99	24	47	23	3	40	93	117	32	157	164	307	291	199	264	404	581	578	467	336	561	476	423	75	93	175	76	162	60	19	7	50	161	236	190
PCHAS_0312400	119	101	228	165	116	52	35	34	81	30	24	52	18	3	26	78	54	21	77	74	245	205	161	295	429	634	568	516	311	580	467	382	110	142	209	158	187	96	13	12	49	110	174	141
PCHAS_0312500	157	179	379	315	151	75	62	78	108	52	23	81	19	1	32	113	73	22	174	192	630	534	398	625	883	1254	1276	1066	701	1033	751	688	176	213	253	286	365	166	45	37	106	269	458	438
PCHAS_0312600	53	27	31	28	21	10	4	12	14	1	14	62	28	6	32	87	70	24	17	32	79	257	189	212	193	220	126	107	92	96	63	75	109	91	128	196	290	176	68	70	127	256	166	157
PCHAS_0312700	310	282	530	463	269	158	87	155	236	94	73	279	219	12	206	417	252	91	310	284	1661	1711	1357	1051	1250	1774	1717	1352	998	1402	1484	981	371	327	630	614	817	567	1115	622	1601	1709	2411	1952
PCHAS_0312800	82	122	53	34	13	17	8	13	28	8	20	143	65	16	113	298	242	150	47	26	99	159	125	86	133	123	100	102	70	108	97	64	57	60	134	193	149	88	119	119	159	201	158	120
PCHAS_0312900	1374	1792	2240	2033	1337	762	737	747	1046	449	304	1059	777	34	976	1566	1338	562	1199	1437	4988	4973	4722	4538	5747	7227	6020	5303	3688	5860	5272	3542	1131	1428	2233	2451	3202	2215	2961	1727	5662	6817	7438	6092
PCHAS_0313000	1892	2347	3559	2774	2026	1024	939	982	1250	628	320	731	466	28	661	1074	975	330	1433	1892	4560	5798	4161	5656	8605	11285	10342	9234	5670	10131	7953	5945	1876	2636	3406	2893	3816	2014	1088	758	2137	4630	4814	4702
PCHAS_0313100	4142	5139	6531	5832	4124	3015	2787	3513	4858	1709	1582	4245	1739	88	2318	3479	2928	1210	2936	3898	8222	9017	8549	9865	12664	16581	15440	14116	8676	18550	19426	10661	8676	9635	14173	10209	14330	7962	4759	3610	9766	12233	12098	11949
PCHAS_0313200	1151	1414	2197	1713	1111	775	691	682	956	513	267	436	82	18	248	546	411	125	997	1173	2580	1539	1113	1829	2733	4922	5150	3962	2643	4745	4180	3379	920	948	1379	1078	1635	771	231	143	351	810	1740	1087
PCHAS_0313300	753	885	1329	1125	699	374	341	332	519	171	136	822	581	14	589	841	722	296	635	769	2315	3825	2580	2343	3142	3325	3127	2520	1672	2613	1835	1715	550	849	876	1769	2091	1970	2642	2099	4318	4736	3412	3492
PCHAS_0313400	45	50	79	60	47	28	29	30	59	16	11	50	17	1	16	37	30	8	21	44	338	312	301	271	346	613	582	484	331	629	654	421	156	176	244	177	261	170	198	121	283	281	527	321
PCHAS_0313500	27	34	14	6	5	7	6	21	19	3	21	641	80	11	199	84	112	68	13	14	73	62	68	37	35	20	5	15	9	11	56	9	519	151	635	6227	3316	2197	301	363	434	252	319	140
PCHAS_0313600	37	33	15	10	9	6	0	8	13	3	20	601	68	12	194	91	78	60	18	20	90	87	68	40	30	37	19	23	23	11	75	11	251	95	461	4341	2376	1541	335	405	517	151	635	139
PCHAS_0313700	1284	1296	2720	2160	1294	666	496	724	1010	293	305	1776	1049	39	961	1750	1338	482	1202	1439	8785	10453	10049	10009	12181	13551	10542	9573	6630	9892	9184	5708	4647	4381	6328	17866	14754	10457	5413	4034	9994	14429	12647	12979
PCHAS_0313800	22	28	13	19	14	10	18	73	38	18	54	1322	115	17	402	67	89	47	11	23	95	83	69	32	33	29	23	19	15	23	171	24	1809	683	1890	8339	5115	3491	219	424	300	315	370	124
PCHAS_0313900	2575	3125	3566	3224	2744	1960	1997	2477	3189	1235	737	1566	554	41	855	1105	976	390	1082	1981	3345	3676	3220	4742	7416	9922	12584	10664	5606	16553	13192	9524	4653	7027	7857	4538	7370	4027	1681	1329	2803	4251	4022	4051
PCHAS_0314000	539	667	909	754	412	326	330	432	540	344	279	857	158	25	373	657	568	227	536	518	2156	2122	1551	1432	1954	2813	2331	1972	1461	1814	3247	1403	1665	1420	2505	1949	2382	1214	430	368	807	1541	2521	2006
PCHAS_0314100	42	81	32	12	14	14	5	12	18	5	14	99	41	21	85	243	183	126	46	11	40	37	43	44	35	53	18	18	25	19	34	15	21	12	58	73	69	19	7	12	23	39	58	31
PCHAS_0314200	726	813	1092	1059	726	483	445	643	939	323	253	563	163	6	238	468	385	120	420	668	1581	1434	1418	1632	1984	3255	3540	2507	1735	4186	4080	2314	1394	1368	2385	1397	2154	952	365	284	805	1361	1895	1724
PCHAS_0314300	358	448	527	518	398	265	238	350	483	155	134	297	100	10	156	275	202	76	202	330	959	1115	907	937	1183	1955	1926	1453	1032	2349	2155	1295	799	677	1333	788	1270	488	262	150	465	1023	1350	1059
PCHAS_0314400	267	368	339	371	267	197	164	275	337	106	97	267	108	5	182	273	247	93	180	264	468	1033	738	767	824	983	1036	721	507	1224	839	745	609	544	974	679	960	538	337	263	538	1133	608	862
PCHAS_0314500	2042	2805	3071	2834	2051	1342	1267	1618	1894	740	506	1354	799	49	1149	1913	1696	690	1628	1976	2723	4893	4011	4975	6778	5687	5520	5041	2946	6811	4148	3355	2349	2962	3935	2922	4267	2534	2349	1498	3793	6591	3686	4609
PCHAS_0314600	111	68	50	47	52	218	148	440	458	201	350	1771	77	13	317	124	175	82	33	39	188	232	160	123	116	193	134	112	72	283	2316	315	4673	3141	5432	4888	5358	2952	273	472	576	300	561	171
PCHAS_0314700	15	7	7	7	4	18	23	35	37	25	31	342	8	6	52	29	23	6	13	6	55	37	32	27	10	21	14	8	10	32	602	53	802	458	1040	1298	1161	699	127	187	270	58	254	44
PCHAS_0314800	790	798	295	175	100	90	34	73	108	41	169	802	415	131	906	1805	1898	1112	319	186	113	375	278	407	283	349	152	127	103	174	78	138	585	440	979	1075	1200	634	122	189	175	404	231	90
PCHAS_0314900	309	359	557	513	323	112	105	100	170	58	39	103	27	0	69	210	118	41	204	245	442	368	423	846	993	1188	1306	1001	712	1295	621	600	169	228	339	222	313	129	38	28	111	273	284	396
PCHAS_0315000	180	190	300	259	155	96	62	95	125	49	31	112	82	2	98	187	117	36	131	150	921	803	724	592	660	1105	1090	759	594	965	861	593	268	202	316	277	386	203	360	259	627	869	1251	1061
PCHAS_0315100	193	236	343	335	167	84	65	56	99	48	27	106	69	3	100	255	179	84	141	202	778	688	884	890	971	1501	1337	1030	811	1107	986	652	244	217	390	291	396	201	143	80	336	748	1083	985
PCHAS_0315200	301	221	655	470	261	163	102	125	288	64	70	307	68	9	91	236	135	52	216	216	1472	1916	1570	1969	2832	3020	3049	2574	1564	3220	2623	1896	1309	1333	1995	1369	1991	865	262	179	495	1515	1326	1651
PCHAS_0315300	9	7	12	11	7	3	1	6	9	3	3	12	5	0	5	19	12	3	3	8	17	44	43	40	68	53	23	39	24	22	14	18	30	22	57	42	48	30	6	4	11	31	13	28
PCHAS_0315400	747	932	1025	990	747	831	908	1160	1594	715	649	2095	156	31	500	448	481	187	436	647	2087	1560	1471	1820	2177	4114	4368	3222	2090	5117	11407	3957	7031	5754	9964	7873	8797	4636	675	899	1479	1319	2989	1923
PCHAS_0315500	40	40	33	41	19	23	6	29	22	10	47	1718	195	31	485	133	109	82	28	48	152	287	216	85	68	46	38	24	41	42	75	30	617	207	524	13024	7630	6751	1210	1926	1932	844	428	298
PCHAS_0315600	10	7	2	2	3	19	14	29	22	11	23	224	4	1	26	16	22	8	2	4	46	34	25	22	20	17	18	10	9	20	576	43	954	547	1099	2270	1781	945	149	233	356	51	239	57
PCHAS_0315700	30	6	5	6	4	3	3	6	8	3	5	55	5	1	12	18	27	17	4	4	3	13	15	27	7	21	12	7	4	19	16	11	74	30	112	91	109	50	5	7	14	19	18	4
PCHAS_0315800	36	24	21	16	11	9	15	15	32	5	12	60	13	2	19	40	49	21	12	15	22	37	21	43	25	49	38	45	14	60	77	44	84	57	124	134	130	93	9	26	31	23	32	13
PCHAS_0315900	1934	2177	2635	2272	1961	1867	1696	2695	3526	1248	1218	3093	244	47	631	433	472	169	692	1326	937	878	595	2062	3418	4312	6308	4769	2556	9732	7845	6016	7411	6216	10122	7303	10100	4835	352	417	697	677	944	709
PCHAS_0316000	119	123	208	183	88	35	10	9	25	9	10	27	14	3	22	83	47	19	70	94	245	286	271	375	537	479	487	430	304	306	154	163	38	39	44	61	84	47	22	22	73	269	152	252
PCHAS_0316100	98	76	192	175	76	55	29	44	69	19	32	195	117	4	80	162	75	35	73	79	996	824	811	513	673	1088	878	711	588	714	947	554	317	301	559	703	635	542	671	457	1007	964	1740	1205
PCHAS_0316200	330	403	591	548	334	186	187	158	284	133	70	228	115	5	178	321	251	107	264	333	1096	1081	862	844	1148	1667	1660	1250	888	1549	1272	1015	402	409	605	455	553	353	475	279	699	1013	1398	1225
PCHAS_0316300	312	330	153	156	256	580	683	1130	1386	513	502	2268	182	31	572	225	293	152	91	112	329	563	345	265	229	306	833	512	152	2191	4151	1439	5365	3343	7871	11862	9737	5194	459	692	1004	615	1241	324
PCHAS_0316400	271	265	380	355	207	151	110	227	278	91	98	462	60	6	148	155	164	79	196	190	595	571	599	731	862	1002	1034	790	597	1188	1470	646	1429	1053	2053	2201	2316	1069	208	251	431	568	718	683
PCHAS_0316500	445	568	687	581	424	249	271	280	452	170	89	256	186	16	205	433	412	150	408	483	1696	1832	1337	1318	1824	2765	2109	2037	1422	2116	2146	1513	506	599	879	536	735	485	969	507	1360	1668	2195	1752
PCHAS_0316600	3256	4208	5498	4876	3168	2029	2141	2031	2497	2110	814	2009	1366	69	2318	3164	2956	1148	3392	3461	10978	14255	9189	6926	9354	14124	11928	9179	7130	9896	10205	6686	3194	3073	4903	4003	5741	3308	6327	3260	6788	12041	14449	11299
PCHAS_0316700	284	253	544	393	223	152	79	143	224	60	78	702	549	3	242	516	274	131	221	250	2333	2275	2283	1923	2076	3154	2416	2209	1575	2471	2486	1553	750	727	1288	3120	3280	2836	1934	1286	3109	2883	4515	3688
PCHAS_0316800	644	843	707	620	723	909	1105	1447	1877	934	645	1660	105	21	419	148	202	105	132	362	318	385	215	276	625	1439	3055	1922	923	5078	7941	3391	4316	3144	6787	4140	6109	2674	278	326	558	269	857	261
PCHAS_0316900	94	151	69	47	25	25	15	20	41	13	26	114	61	18	109	296	238	124	61	30	50	33	40	51	41	147	104	86	57	117	118	80	61	46	128	136	81	53	11	7	25	20	54	30
PCHAS_0317000	23	18	27	26	12	7	3	7	11	4	8	31	30	1	29	36	21	14	9	8	121	172	134	83	64	87	73	31	35	54	54	43	69	35	80	325	263	154	60	64	134	141	226	80
PCHAS_0317100	219	222	505	402	213	72	38	46	62	29	17	116	90	4	106	255	166	43	244	225	1222	1205	1218	1103	1090	1642	1289	1033	835	1059	645	658	88	89	168	174	285	143	301	201	761	1271	1383	1353
PCHAS_0317200	451	598	844	719	481	258	266	254	400	166	120	801	524	21	496	637	486	240	447	540	1308	2277	1782	1481	1658	1731	1648	1420	994	1924	898	1109	473	531	809	1732	1982	1776	1595	1236	2411	3110	2110	2238
PCHAS_0317300	785	1036	1228	1115	801	597	714	678	929	486	258	682	284	16	457	621	562	236	571	790	2002	2448	1679	1458	1932	3428	3128	2461	1682	3381	3624	2392	1095	1107	1946	1586	2290	1226	1441	825	1685	2106	2907	2218
PCHAS_0317400	1334	1362	2323	1864	1258	588	414	705	951	176	278	1191	826	23	728	1437	939	407	1039	1222	2911	4980	4634	5847	6917	5271	4553	4107	2851	4946	2834	2415	1691	2252	2446	3798	4650	3456	2817	1858	4801	8555	3797	5059
PCHAS_0317500	667	843	1161	1015	613	403	345	560	826	225	276	1281	548	19	690	923	715	323	610	751	1749	3494	2694	2368	2655	2603	2540	2070	1434	2603	2009	1520	1755	1346	2380	3648	3664	2550	1600	1229	2566	3967	2469	3154
PCHAS_0317520	349	329	478	430	257	194	120	154	243	88	81	385	259	6	207	412	274	114	233	294	2018	2445	1832	1310	1549	2522	1846	1570	1107	1673	2184	1233	512	634	947	1012	1319	1060	2055	1131	2409	2553	3818	2541
PCHAS_0317530	2	1	4	3	1	0	4	1	2	1	0	9	2	0	1	4	3	4	0	1	124	81	105	81	85	152	101	95	83	84	146	67	32	46	50	84	102	55	46	42	80	97	225	126
PCHAS_0317540	7	11	17	15	14	6	5	4	9	6	3	8	10	0	6	15	7	4	7	10	116	87	89	75	96	140	90	93	76	89	139	49	32	36	61	49	80	56	58	43	89	121	215	181
PCHAS_0317600	214	318	154	83	57	33	24	28	44	19	49	293	131	54	316	720	686	402	140	72	109	206	195	170	174	243	141	147	122	132	95	103	79	58	205	228	134	123	74	67	131	158	169	152
PCHAS_0317700	2581	3582	4560	3820	2647	1761	2121	1838	2238	1885	685	1967	1047	67	1978	2699	2648	1108	2637	3059	8917	11572	6830	5686	8240	11713	9414	8072	5995	8798	9088	6013	3283	2841	4401	3715	5184	3262	6082	3029	5969	9798	12260	8678
PCHAS_0317800	7	8	35	19	10	6	12	9	28	2	4	76	14	1	5	19	10	7	6	9	487	405	347	263	264	538	461	352	267	467	752	325	241	146	348	443	561	355	710	501	934	484	863	424
PCHAS_0317900	1043	1121	1780	1442	865	601	628	779	926	568	412	2712	2027	50	1772	2206	1655	844	1335	1063	11709	12598	8871	5231	5813	7863	5851	4763	3974	4364	6939	3832	4065	3026	5379	8676	10109	8398	15090	8296	15452	14648	22183	13719
PCHAS_0318000	321	332	643	542	288	159	106	112	167	77	37	101	29	1	65	176	120	56	207	309	845	776	629	900	1355	1789	1962	1463	1081	1740	1088	1060	228	306	412	317	503	206	61	62	173	435	615	673
PCHAS_0318100	628	674	419	496	598	972	769	1699	2068	499	849	2703	156	24	504	222	262	101	87	305	185	221	161	264	365	563	1254	954	342	2936	4390	1657	6180	3964	7734	6582	8565	3523	302	395	736	376	468	277
PCHAS_0318200	954	624	1859	1621	745	410	172	341	687	147	236	1957	1137	17	553	1249	580	194	683	787	8693	9596	8032	5912	7241	11243	8775	7421	5461	7058	8862	4842	2568	2917	3970	10713	9951	8657	9271	6082	11166	11616	17404	11515
PCHAS_0318300	7786	10428	11578	11047	6754	3342	2942	4055	3897	1428	1650	20448	16954	470	16523	18792	16332	8255	10723	9135	14498	35378	29477	25126	34866	17062	12537	13092	10893	10783	6782	6271	6088	9178	6161	74627	60056	70687	32572	26301	55450	74636	23497	34582
PCHAS_0318400	40	25	16	15	20	109	109	294	279	117	247	1669	37	7	287	49	72	19	11	29	184	134	110	57	49	42	58	50	39	146	4104	252	5951	3624	7882	7438	7111	4028	423	666	913	299	948	273
PCHAS_0318500	9	9	6	6	14	19	23	32	42	19	13	50	2	0	5	1	3	0	0	2	3	9	8	5	14	18	55	48	17	205	125	53	224	139	297	217	188	126	6	11	16	13	28	16
PCHAS_0318600	5	4	0	3	1	1	0	3	3	1	2	159	60	1	42	19	8	8	2	3	69	32	33	16	12	8	8	13	6	6	39	8	65	33	65	1135	741	669	257	323	349	139	360	122
PCHAS_0318700	29	8	9	8	6	31	9	115	81	9	69	832	43	2	93	23	25	9	3	12	127	67	82	63	53	42	17	24	18	25	760	55	5847	3323	3707	9308	7152	4262	380	708	867	461	292	164
PCHAS_0318800	19	6	38	21	5	14	15	10	13	11	8	33	6	0	4	15	9	4	19	14	114	44	41	31	42	71	113	65	46	121	176	67	68	61	88	116	144	49	41	20	54	43	102	31
PCHAS_0318900	345	444	598	485	333	121	109	112	123	87	62	863	903	11	696	766	563	298	391	409	332	378	333	257	299	322	216	234	171	159	170	121	42	64	66	389	433	476	476	278	671	692	807	603
PCHAS_0319000	14	21	24	32	19	7	6	4	7	1	0	26	20	0	26	22	12	12	9	22	37	49	67	59	43	54	42	36	35	30	28	26	6	5	13	75	77	61	54	44	95	123	80	84
PCHAS_0319100	4	2	0	4	3	4	3	8	9	6	6	3	0	0	2	1	0	0	1	6	8	8	5	10	7	9	24	26	7	35	47	30	44	31	35	40	57	14	1	6	9	12	12	9
PCHAS_0319200	50	83	71	67	40	28	25	28	30	17	15	114	124	12	85	99	68	43	47	46	2960	3161	2824	1910	2159	2681	2451	1913	1348	2104	2320	1414	542	636	978	3678	3596	3607	3762	2156	5235	4998	6771	4881
PCHAS_0319300	58	36	38	72	25	13	14	12	9	8	25	614	783	21	423	255	247	169	46	56	81	89	70	40	48	46	26	29	29	10	15	11	9	11	19	407	234	314	163	105	156	117	244	171
PCHAS_0319400	3	6	5	6	3	2	1	3	6	3	3	10	1	0	4	3	3	2	4	3	4	6	1	2	5	9	12	6	7	13	9	11	8	5	5	17	14	2	1	0	8	2	3	6
PCHAS_0319500	3	2	6	5	3	0	1	2	2	2	7	19	2	0	6	3	4	1	3	8	6	5	6	3	8	5	3	6	6	5	11	5	6	7	3	6	16	5	3	5	6	10	9	3
PCHAS_0319600	6	4	1	3	2	7	1	11	5	6	60	263	12	3	51	11	5	4	2	10	1	1	0	1	1	0	1	1	0	2	36	3	56	39	83	66	99	27	4	1	3	6	6	3
PCHAS_0319700	6	7	2	5	5	14	7	14	38	10	57	226	2	1	32	8	7	4	1	8	59	48	31	25	67	55	110	69	29	351	849	227	1968	923	1859	1809	2441	1195	59	56	133	90	163	71
PCHAS_0319800	6	9	6	8	18	11	13	17	26	3	21	70	2	0	7	7	5	3	5	11	110	117	51	80	153	219	353	312	137	667	781	443	657	408	761	630	790	377	38	47	85	90	153	112
PCHAS_0319900	10	13	6	12	17	11	17	41	49	14	79	263	21	1	36	13	7	3	0	17	7	7	1	5	3	10	22	15	5	45	112	31	115	71	113	123	157	87	2	10	6	7	8	7
PCHAS_0320000	5	7	3	2	4	10	3	15	19	5	31	96	3	3	18	3	5	0	2	5	6	4	3	4	6	7	12	6	9	61	70	32	127	69	91	61	124	63	4	4	10	5	10	5
PCHAS_0320100	3	6	0	2	2	8	18	21	31	12	49	75	3	0	13	4	8	3	1	5	2	0	1	1	3	0	1	7	0	12	39	8	13	19	24	28	42	23	2	0	0	2	2	0
PCHAS_0320200	6	5	3	2	7	13	21	32	39	12	49	180	3	1	24	6	5	4	5	5	1	2	1	0	1	0	6	3	0	21	89	12	66	60	133	85	82	53	10	7	6	6	13	5
PCHAS_0320300	11	11	3	4	6	18	16	27	27	9	16	42	1	0	9	6	3	1	3	5	6	2	1	0	3	9	19	13	1	39	49	20	48	18	62	23	64	20	0	1	4	4	2	5
PCHAS_0320400	4	3	2	2	3	7	5	18	15	3	20	40	1	0	8	3	3	0	0	2	4	3	0	1	0	2	7	4	2	30	85	12	153	93	200	135	213	63	4	4	5	7	19	8
PCHAS_0320500	889	1045	2347	1492	607	246	131	56	65	130	58	225	291	20	607	1879	1627	517	2129	1208	6388	5299	3563	3607	5131	5651	3692	3824	2809	1529	1444	1273	92	221	161	326	406	261	1279	482	1970	4234	5817	4056
PCHAS_0400101	1	2	4	1	2	9	17	25	36	9	51	207	4	1	28	7	4	1	2	1	6	4	0	1	1	5	10	7	1	28	74	22	113	37	137	112	127	54	2	4	3	5	16	5
PCHAS_0400111	4	3	0	4	2	7	16	31	43	20	55	208	4	3	26	7	3	0	2	1	1	2	0	0	1	0	2	4	1	11	41	6	69	31	71	55	60	26	1	3	2	0	7	4
PCHAS_0400121	19	14	3	13	13	27	34	51	90	37	99	260	9	4	55	14	16	4	6	10	3	8	7	6	14	21	43	20	12	143	211	59	208	186	303	175	262	119	9	4	16	13	14	6
PCHAS_0400200	1	1	3	3	5	5	6	7	28	3	34	126	4	1	23	8	10	3	2	3	2	1	1	3	1	1	1	2	1	6	18	12	32	18	43	31	33	17	2	1	1	1	5	5
PCHAS_0400300	56	31	40	60	54	63	55	148	293	61	323	997	41	7	143	33	38	9	12	27	18	13	8	11	16	62	77	57	25	121	217	109	190	130	296	120	197	83	2	6	13	13	34	13
PCHAS_0400400	27	20	29	25	27	27	31	84	175	32	161	563	32	3	75	25	21	8	5	8	8	8	9	15	17	28	80	42	17	120	233	93	183	101	279	159	211	113	8	10	16	6	55	8
PCHAS_0400500	28	18	6	17	16	34	40	167	185	93	562	2182	76	21	498	73	116	20	17	31	6	5	4	3	6	1	2	9	2	19	100	14	291	314	347	359	327	167	29	30	33	15	35	9
PCHAS_0400550	5	0	1	2	1	0	0	2	4	0	2	9	1	0	5	2	2	1	0	3	3	5	5	3	12	8	5	7	7	13	3	8	4	7	7	4	5	4	3	7	6	3	6	5
PCHAS_0400600	12	13	27	22	10	9	15	25	42	15	11	46	8	0	10	8	5	3	5	13	20	50	30	43	48	69	62	59	34	93	69	46	45	44	58	43	70	34	13	13	23	41	24	31
PCHAS_0400700	49	35	86	96	39	29	19	6	18	10	10	125	152	2	77	116	65	27	37	42	1763	2194	1679	997	1107	1362	998	869	771	618	525	493	83	130	149	1160	1234	1435	2766	1674	3510	3198	4011	2802
PCHAS_0400800	7	6	5	8	8	4	5	1	5	1	0	3	5	0	2	6	2	2	5	3	181	160	109	98	118	174	200	132	100	165	148	117	59	38	91	141	214	158	357	207	334	177	372	149
PCHAS_0400900	413	475	384	399	276	1145	1135	2132	2202	1251	1365	4520	918	32	1361	842	796	362	357	344	1841	1888	1541	976	911	1149	873	805	659	1077	6678	1269	7132	5824	7602	6587	9268	5398	2869	2246	4144	2952	4258	2791
PCHAS_0401000	640	679	630	601	507	1069	1006	1745	2027	1028	1019	2758	251	18	634	478	422	164	398	424	315	313	199	199	240	322	310	254	164	414	1653	412	1110	1107	1445	916	1457	881	358	280	457	317	597	297
PCHAS_0401100	37	23	5	7	23	145	126	326	348	145	232	936	34	8	159	33	53	16	7	24	1	2	1	0	0	5	0	3	1	2	66	6	75	76	110	82	48	44	5	5	12	5	17	3
PCHAS_0401200	167	230	249	228	122	85	92	85	124	74	67	884	865	7	618	582	470	306	193	207	122	127	136	67	51	75	40	39	28	45	44	25	16	19	15	148	135	180	225	185	338	289	299	216
PCHAS_0401300	64	38	87	89	37	15	4	5	7	8	9	247	322	0	133	251	126	46	86	50	1091	1437	1071	598	571	650	384	290	294	146	133	137	32	40	30	530	632	731	1233	833	1463	1711	2432	1722
PCHAS_0401400	1	4	1	2	1	0	0	0	2	0	1	1	0	0	3	1	3	3	1	5	27	32	17	35	41	31	30	37	17	22	14	9	1	8	6	12	14	11	23	21	39	44	35	49
PCHAS_0401500	275	419	554	574	251	104	65	44	57	65	36	509	471	16	509	723	614	302	397	405	2682	2565	2329	1627	1802	2469	1718	1577	1223	995	846	665	181	243	252	1641	1680	1887	2972	1887	4616	4282	5591	3918
PCHAS_0401600	243	346	306	315	194	154	134	177	222	128	93	335	193	6	235	290	266	111	208	231	718	843	735	541	666	749	788	620	498	739	894	505	384	466	550	546	734	480	476	358	763	1042	1304	1071
PCHAS_0401700	129	114	114	175	61	35	23	26	26	28	87	2319	1963	24	1286	754	630	395	258	128	3071	2299	1805	970	871	783	452	495	391	203	297	214	262	233	335	11790	9260	10467	7197	6031	8722	4818	10682	4837
PCHAS_0401800	46	36	105	70	50	13	11	7	23	4	7	22	8	0	10	25	16	1	29	28	336	342	303	349	463	766	794	603	447	671	573	482	70	96	148	147	239	71	47	22	89	221	367	270
PCHAS_0401900	795	960	1130	1140	786	570	512	764	979	360	342	1103	350	26	598	807	756	249	609	768	1539	2158	2052	2016	2125	2496	2520	1980	1369	2608	2250	1562	1741	1371	2439	2211	2732	1547	1355	852	2417	2930	2185	2448
PCHAS_0402000	1115	1366	1710	1686	1129	599	427	820	854	186	273	1394	940	24	931	1471	1086	479	877	1080	2798	6805	4603	4728	7204	4422	4022	3429	2594	4327	2543	2095	2080	2651	2484	5186	5915	5676	5599	5165	8126	11411	4347	5577
PCHAS_0402100	293	333	506	409	348	264	175	351	432	120	123	389	24	1	87	83	57	26	112	238	272	106	131	461	715	1304	1836	1341	845	2616	2481	1306	1203	987	1790	1360	2011	723	77	99	207	133	207	152
PCHAS_0402200	291	417	529	510	308	240	247	315	429	206	144	328	41	8	116	181	168	59	216	301	1013	812	597	876	1315	2165	2232	1790	1178	2481	3059	1701	1230	1039	1726	1273	1834	749	130	97	224	415	857	547
PCHAS_0402300	321	356	479	353	302	233	195	319	392	113	132	507	110	10	174	315	269	104	260	286	917	1107	864	946	1152	1527	1429	1136	808	1669	1948	1062	1016	827	1528	1226	1748	1022	612	447	1075	1255	1250	1051
PCHAS_0402400	1694	1757	2899	2255	1609	1313	1108	2140	2378	700	852	2822	233	27	528	712	661	194	957	1267	3780	3641	3467	6712	9661	11554	11674	9706	5691	15413	16151	9190	13805	12349	17353	15306	20041	9412	1169	1322	2504	3429	3404	3726
PCHAS_0402500	538	607	957	755	493	297	242	362	400	174	113	320	123	7	226	409	377	114	411	503	1161	1964	1556	2149	2756	2555	2492	2074	1361	2684	1453	1268	866	873	1134	924	1506	690	437	232	719	2087	1181	1534
PCHAS_0402600	747	993	1483	1219	839	410	267	447	613	148	150	519	265	12	431	827	674	260	729	795	1680	2817	2683	3301	3379	3043	2925	2443	1804	3139	1685	1524	868	832	1253	1233	1790	746	773	395	1498	3668	2023	2693
PCHAS_0402700	1266	1561	2008	1813	1373	1092	994	1546	1961	646	584	1998	200	29	547	548	553	226	635	1128	1169	966	929	2011	2642	3722	4002	3500	2052	5471	5645	2986	3616	2924	5708	7425	6685	3460	365	555	905	792	1331	1069
PCHAS_0402800	615	731	978	950	592	386	366	393	641	318	182	500	281	14	344	598	446	176	458	622	2071	2252	1803	1406	1750	3076	2977	2136	1476	2904	2847	1959	799	654	1312	849	1346	750	1116	613	1537	2214	3016	2378
PCHAS_0402900	14	6	8	6	5	21	11	31	39	16	32	163	10	2	20	23	19	12	5	12	31	37	32	27	20	45	40	32	17	58	381	57	845	475	977	1036	958	513	58	110	138	47	150	50
PCHAS_0403000	280	247	252	231	268	326	292	744	877	155	318	1042	64	7	174	91	115	42	46	119	158	130	126	215	366	492	1026	781	333	2510	3230	1313	4125	3367	5088	4173	5290	2446	198	308	437	267	269	154
PCHAS_0403100	85	63	229	139	92	51	41	34	59	20	19	38	8	1	7	30	24	8	43	79	309	169	124	222	433	858	817	637	430	717	694	476	132	163	259	244	309	143	14	24	65	71	172	137
PCHAS_0403200	1537	1772	2090	1884	1658	1278	1296	1838	2553	786	681	1355	139	20	337	294	278	105	540	1052	620	709	399	1528	2488	3531	5403	3800	1995	8757	5449	5048	3926	3441	5966	3664	5851	2517	193	221	317	418	571	444
PCHAS_0403300	779	927	999	883	807	687	742	1008	1076	457	322	543	53	14	153	127	167	55	237	538	414	302	198	843	1457	2634	3416	2546	1403	4971	4478	2698	1880	1642	3242	1773	2793	1147	77	99	209	188	371	247
PCHAS_0403400	141	277	89	19	30	29	16	23	50	12	37	211	112	49	268	602	576	406	127	25	24	18	17	39	24	98	31	22	20	45	48	35	28	29	119	101	52	27	6	13	2	9	34	9
PCHAS_0403500	1	1	0	0	1	0	1	0	0	1	0	11	0	1	3	4	2	2	1	1	2	3	1	1	1	0	0	0	0	2	1	1	9	5	12	47	32	30	4	10	10	4	7	0
PCHAS_0403600	1208	1634	565	282	141	168	50	154	232	97	279	2619	904	311	2003	4028	3426	2195	691	287	173	187	296	280	84	354	125	73	56	155	129	125	639	302	1370	7319	3996	2832	395	582	689	338	802	202
PCHAS_0403700	941	1028	1581	1497	876	595	530	763	1035	384	417	1719	803	28	797	1417	1055	427	1025	937	5541	5169	4514	3804	3924	6377	4953	4011	2976	4329	7539	3111	3934	2640	5782	7192	6307	3917	2374	1565	4812	5643	9277	6282
PCHAS_0403800	464	509	848	738	496	292	247	331	471	149	141	373	51	6	117	243	186	70	258	364	825	814	883	1758	2077	2760	2908	2209	1512	3772	2556	1836	1119	1064	1870	1328	1977	771	102	138	267	600	673	833
PCHAS_0403900	3514	4556	6049	5231	3279	2023	2255	2385	2902	2053	960	2734	1651	84	2910	3945	3963	1537	3776	3909	14298	19583	12371	9241	11031	16421	13491	10944	8765	10699	10618	8687	4260	3582	5123	4621	6235	4079	7916	4081	9659	15708	17665	15152
PCHAS_0404000	216	275	457	363	205	119	110	111	132	115	47	120	25	3	46	105	88	43	190	217	583	381	263	512	806	1322	1277	994	680	923	1005	721	258	272	439	348	502	213	61	37	88	171	373	332
PCHAS_0404100	11	18	13	11	7	4	3	6	8	3	7	10	6	0	8	13	14	9	11	12	47	22	19	28	41	39	46	32	40	31	35	28	19	24	27	49	45	14	16	21	24	19	32	26
PCHAS_0404200	93	116	270	218	91	30	17	9	17	13	0	33	38	0	45	154	98	42	132	90	1018	919	863	914	1187	1442	1074	937	824	563	427	383	43	79	78	103	118	56	148	87	341	706	1078	1013
PCHAS_0404300	108	109	181	169	104	60	55	70	134	33	32	193	95	2	84	126	100	47	82	89	868	1043	760	527	679	1040	915	685	538	830	922	592	376	287	578	576	707	531	977	482	1124	1164	1535	991
PCHAS_0404400	206	158	307	280	180	109	80	132	184	57	64	268	27	4	94	137	126	37	163	202	923	1077	866	935	1278	1495	1371	1097	749	1038	1262	747	823	635	1005	952	1227	566	141	110	245	662	852	829
PCHAS_0404500	573	745	608	612	572	558	415	1093	948	219	324	983	76	19	224	183	238	101	156	359	283	407	212	624	1376	1143	1771	1330	790	2915	2350	1419	3954	4202	3897	4349	5859	3085	340	464	620	500	298	228
PCHAS_0404600	614	806	635	570	293	159	103	120	193	73	118	1123	624	76	936	1552	1274	814	523	429	915	1601	1473	1320	1258	1052	913	708	641	708	450	333	997	457	1248	4770	3109	2244	1540	1023	2606	2652	1460	1759
PCHAS_0404700	1680	1468	3940	2787	1438	674	411	489	809	289	260	1544	1772	35	952	2726	1548	585	1817	1656	22170	14651	16378	14228	16556	25789	17527	16056	12737	12028	12838	8502	2213	3278	3777	5181	6435	4731	8452	5530	16465	18962	31833	24199
PCHAS_0404800	527	545	950	866	540	347	310	352	618	269	189	553	123	10	207	333	253	102	325	504	2145	2121	1532	1512	2086	4339	3678	2729	1997	3482	4469	2388	1457	1295	2326	1452	2144	1013	688	380	899	1494	2598	2118
PCHAS_0404900	2868	3308	5217	4402	2693	1325	895	1456	1713	401	459	1536	1494	56	1681	3619	2968	1025	2852	3020	5708	9696	10214	14328	14793	12819	8738	8786	6236	9148	5806	4373	2786	2926	4344	3893	5636	2864	2730	1640	5869	15018	7350	10897
PCHAS_0405000	158	157	125	133	122	286	243	497	591	227	318	1439	72	13	258	101	139	64	40	92	186	198	133	148	170	287	496	307	132	868	2439	676	3929	2544	5005	4108	4544	2272	231	303	422	240	452	199
PCHAS_0405100	2174	3081	4390	3326	2265	1389	1648	1356	1561	1352	391	908	572	66	1175	2037	2072	772	2461	2454	6820	7336	4531	4481	6519	9854	8100	6964	4572	7230	7230	5241	1509	1763	2810	1689	2474	1297	1062	512	1586	4619	6734	5114
PCHAS_0405200	59	39	31	26	19	9	5	11	17	3	11	57	23	14	71	98	110	50	42	32	88	276	216	188	146	165	60	53	52	53	47	37	71	59	85	134	163	111	15	24	71	185	193	72
PCHAS_0405300	866	1156	1342	1261	950	787	985	1019	1281	769	391	1219	145	26	474	465	475	212	563	797	1908	1691	1185	1457	1926	3977	3941	2822	1864	4388	5689	3193	2816	1933	4110	3821	4252	1905	300	257	541	897	2145	1305
PCHAS_0405400	657	815	1120	1026	624	493	449	617	762	307	214	794	323	11	425	614	532	195	498	609	1857	3032	2442	2439	2954	3507	3340	2820	1831	3865	3323	2215	2083	1596	3054	2549	3179	1679	1073	637	1637	3303	2486	2768
PCHAS_0405500	506	537	971	743	503	263	220	271	386	154	77	220	47	6	115	253	195	59	370	427	673	833	568	1137	1557	1777	2110	1653	1088	2224	1281	1350	462	567	714	508	782	346	64	48	109	433	504	576
PCHAS_0405600	1574	2076	2847	2300	1600	1133	1297	1205	1620	1119	471	981	199	29	552	856	807	327	1148	1569	3083	3300	2284	2621	4205	7329	6540	5520	3504	6282	6483	4656	2393	2464	3288	1994	3007	1577	413	281	664	1971	2975	2420
PCHAS_0405700	2822	3419	4239	3606	2707	2616	2476	3846	4335	1899	1780	5190	617	61	1599	1891	1815	628	1976	2447	4763	4913	4282	5848	7290	9917	10173	8277	5158	12729	16450	7547	13136	10476	19239	14952	18469	8920	1168	1318	2799	4652	5713	5299
PCHAS_0405800	1428	1514	2242	1875	1283	1074	903	1212	1638	795	500	1763	202	33	541	738	654	204	795	1148	2722	2384	1677	2668	3731	6512	6755	4880	3082	7330	8987	4665	4116	3180	6402	6068	6681	3382	501	562	1074	1364	2803	1913
PCHAS_0405900	600	691	996	841	552	463	445	504	782	400	258	688	86	11	195	299	251	88	380	479	1628	1246	873	1244	1743	3295	3355	2552	1759	3584	5071	2548	2070	1636	3102	2312	2991	1553	262	230	441	694	1583	1206
PCHAS_0406000	399	521	628	578	413	310	360	317	435	317	147	298	90	4	167	308	288	132	260	389	876	993	624	634	902	1564	1481	1244	797	1496	1800	1135	576	543	884	488	782	327	225	128	315	729	1053	795
PCHAS_0406100	3204	4070	5673	4874	3398	1749	1785	1486	1809	1306	392	831	397	39	971	1772	1687	588	2478	3211	7246	7606	6000	8234	10959	17851	15425	13076	8402	13332	10896	8558	1953	2357	3676	2668	3708	1749	638	429	1566	5191	7224	6648
PCHAS_0406200	6912	9602	12286	10640	7168	4501	5318	4505	5501	4403	1687	4683	3328	198	5467	7550	7608	3062	7566	7885	25110	33433	21758	16692	21098	32883	26242	21293	16179	22561	22620	16873	6661	6416	10521	9216	12619	7784	14811	7436	17679	27621	33804	25776
PCHAS_0406210	3	2	9	9	3	1	1	0	2	0	0	4	5	0	2	4	3	2	1	0	51	60	64	45	42	48	58	48	40	53	47	31	10	16	12	19	16	15	34	30	31	60	95	60
PCHAS_0406300	4767	6464	8576	7274	4821	3068	3233	2872	3699	3081	1012	3028	2207	122	3650	4983	4806	1878	5333	5205	20170	23299	15448	11716	15002	22956	19030	14972	11667	15802	16118	11545	4080	3942	6445	5487	8049	5132	11704	5652	13289	20199	25885	20161
PCHAS_0406400	7897	8942	13962	11957	7370	4546	3856	4640	6141	2972	1833	5856	3874	158	5456	8643	7001	2577	7815	7926	24772	35723	25973	22285	26552	37067	30088	25185	18992	25285	22596	17935	8368	7654	11778	10297	14540	9498	13432	7732	19447	34380	32376	33210
PCHAS_0406500	49	44	48	36	21	10	8	10	17	9	10	265	39	1	86	104	86	47	30	40	86	136	110	105	101	151	93	91	66	56	96	49	318	81	482	1218	662	456	48	64	87	127	155	112
PCHAS_0406600	236	274	518	423	256	95	73	80	143	36	30	116	72	5	91	215	121	47	181	232	1357	1380	1188	1093	1515	2212	1985	1591	1272	1599	1323	1091	224	256	384	274	417	203	348	195	584	1166	1546	1436
PCHAS_0406700	102	107	101	74	97	214	182	357	447	186	233	1165	54	11	202	109	114	48	36	65	138	138	88	86	89	192	350	272	92	722	2267	572	2208	1185	3361	2927	3063	1486	177	200	340	144	474	173
PCHAS_0406800	124	126	114	95	129	159	205	317	430	157	140	475	33	4	85	44	64	26	24	57	85	117	49	57	73	161	560	342	129	1167	1591	772	1253	944	1643	1692	1993	852	106	115	186	85	229	72
PCHAS_0406900	438	404	222	218	262	801	747	1709	1834	593	976	3627	227	39	820	348	477	211	118	195	260	281	247	276	250	275	541	388	191	1575	4037	1009	7917	5400	10131	9800	9881	5137	437	673	940	571	672	325
PCHAS_0407000	468	462	890	777	468	218	164	223	317	108	80	260	77	11	152	407	273	92	367	448	1508	2057	1792	2109	2662	3211	2782	2393	1696	2538	1899	1436	660	648	1125	690	1058	492	224	130	553	1706	1545	1764
PCHAS_0407100	29	25	56	26	15	10	5	15	15	2	9	42	9	2	29	38	52	20	20	23	113	241	149	205	287	246	171	155	110	154	93	84	140	148	98	184	286	104	57	52	77	202	123	131
PCHAS_0407200	732	884	1152	959	827	584	491	696	1012	295	247	469	53	6	130	140	166	45	277	533	444	384	264	722	1266	2115	2791	2201	1122	3964	2746	2331	1219	1412	1854	995	1713	800	80	91	154	199	302	269
PCHAS_0407300	27	20	14	10	11	21	11	53	49	18	49	861	64	5	159	62	76	37	16	20	77	44	82	46	50	58	56	43	23	60	370	61	2137	853	2207	5004	3345	1827	111	199	259	224	217	101
PCHAS_0407400	1943	2311	3994	3242	2123	1022	881	950	1292	614	312	653	335	24	572	1232	987	301	1555	1851	4701	5912	4416	5931	9027	11832	10417	9426	5764	9597	7067	6020	1642	2220	3058	2114	2790	1404	531	338	1158	4087	4414	4842
PCHAS_0407500	23	27	23	29	23	21	9	13	18	21	18	565	76	6	147	42	32	20	11	19	80	50	71	39	57	79	126	99	48	169	213	110	166	92	351	3781	1607	1203	270	388	416	121	554	81
PCHAS_0407550	0	2	3	1	2	1	1	0	1	0	0	0	1	0	0	1	3	2	1	2	2	2	2	5	1	7	6	5	4	1	3	2	0	1	3	1	5	2	0	0	2	0	7	2
PCHAS_0407600	371	470	682	554	368	164	195	135	125	175	38	70	32	1	97	210	183	66	351	377	1106	897	597	806	1178	1901	1693	1319	956	1362	1128	981	149	199	247	258	297	147	95	50	154	462	848	646
PCHAS_0407700	988	1070	1572	1421	971	708	662	867	1334	437	440	1509	448	18	615	873	736	282	764	863	2510	3388	2865	2679	3096	4144	4151	3147	2148	4502	5132	2861	3457	2705	4962	3513	4811	2469	1355	900	2167	3579	3499	3573
PCHAS_0407800	7	6	6	3	3	2	0	4	5	1	3	355	43	0	91	22	24	18	3	5	73	39	43	21	16	21	19	19	15	11	51	8	253	57	389	3656	1784	1229	168	223	343	111	302	71
PCHAS_0407900	402	552	782	638	386	288	308	294	429	291	129	304	51	8	106	198	183	70	308	397	947	583	390	728	1216	2202	1896	1523	1042	1865	2146	1376	653	673	960	701	988	541	119	114	159	263	640	374
PCHAS_0408000	1128	1329	1651	1690	1037	746	636	1041	1309	438	436	1330	511	23	696	1183	884	353	812	998	2630	2815	3290	3204	3439	4555	4439	3348	2409	4667	4737	2611	2594	2418	3932	2843	4024	2027	1216	796	2648	3854	3758	3883
PCHAS_0408100	493	577	782	686	448	288	244	332	412	158	114	311	172	6	234	460	364	130	414	481	1334	2141	1489	1525	2090	2423	2318	1947	1252	2335	2010	1440	711	718	1123	827	1257	664	715	414	1048	2013	1715	1716
PCHAS_0408200	17	29	7	10	5	5	4	1	6	5	4	34	17	7	37	69	64	29	16	4	41	86	42	51	25	69	16	15	12	14	11	20	23	20	32	46	44	21	17	8	17	26	92	29
PCHAS_0408300	170	115	86	68	77	246	147	521	577	129	313	1613	60	12	266	148	192	96	38	48	111	135	121	119	112	111	172	114	66	464	1434	356	3482	2426	4078	4651	4960	2375	197	322	398	245	268	137
PCHAS_0408400	185	214	349	355	148	58	54	50	92	22	32	311	461	7	379	540	449	157	293	224	823	1680	1599	1118	1043	922	604	565	464	546	344	392	206	184	362	658	750	587	1211	816	1746	2327	1556	1927
PCHAS_0408450	0	1	3	0	1	0	0	0	0	0	0	3	3	0	0	1	2	0	0	0	69	57	49	37	32	47	23	16	27	16	16	15	2	5	2	5	12	11	30	19	55	78	116	54
PCHAS_0408500	2526	3220	3891	3504	2590	1537	1385	1419	1829	988	380	1120	807	39	1104	1967	1714	632	1902	2432	5745	5588	4953	5941	7616	11246	10033	8962	5459	10580	9077	6544	1715	2380	3452	2485	3595	2186	2221	1273	4455	6067	7270	6208
PCHAS_0408600	4422	6117	7894	6957	4660	3090	3428	3120	4168	2936	1296	3475	1892	96	3241	4613	4408	1844	4418	5079	22588	28678	17764	14315	20097	29309	25214	20367	15256	21306	24201	15890	7475	7254	12067	7791	11360	6975	10651	5478	12661	24349	27396	23032
PCHAS_0408700	216	272	429	364	204	88	69	83	137	46	40	88	36	2	89	222	176	56	215	214	900	1478	993	1025	1382	1375	1335	1007	821	997	636	658	196	240	286	227	306	164	125	110	279	912	724	1117
PCHAS_0408800	319	329	555	512	335	183	170	173	298	173	87	162	69	8	127	302	222	83	275	348	1040	1008	855	826	1088	1747	1646	1309	994	1493	1524	1056	380	456	629	376	592	264	174	136	284	767	1246	1043
PCHAS_0408900	471	546	770	672	524	246	193	296	385	108	97	171	22	8	77	155	131	44	242	361	491	559	498	1320	1813	1958	2133	1807	1001	3002	1769	1308	647	716	1235	662	1080	388	65	63	135	426	343	458
PCHAS_0409000	219	245	358	300	198	140	143	154	166	107	55	109	32	2	60	86	74	24	110	160	530	383	329	519	681	1446	1411	1074	737	1536	1595	1056	330	324	616	295	506	241	42	35	81	219	418	332
PCHAS_0409100	8	13	11	9	4	2	0	1	1	0	5	16	11	2	10	42	34	23	9	11	35	36	24	21	30	30	21	12	10	23	17	16	8	5	15	27	23	20	48	26	87	43	64	42
PCHAS_0409200	1070	1494	1922	1851	1134	431	334	427	475	165	159	1329	1075	24	1085	1710	1402	614	1106	1342	3605	9021	7096	7462	10764	6855	5236	5310	3880	4453	2105	2125	1041	1495	1401	6066	6062	5877	4451	3505	6713	14496	5750	7850
PCHAS_0409300	628	736	1080	1022	694	416	286	579	705	191	215	742	371	18	492	901	724	293	593	660	1764	3036	2605	2959	3740	3051	2814	2450	1648	3193	2369	1631	2019	2048	2530	2238	3133	1645	1235	710	1953	4013	2213	2941
PCHAS_0409400	38	29	13	18	23	95	72	234	200	52	129	982	36	5	128	65	50	18	12	24	139	116	107	80	64	70	52	50	40	143	1217	126	4399	3131	3959	6466	6514	3603	359	700	814	334	349	175
PCHAS_0409500	252	309	513	414	273	146	120	105	205	103	44	174	156	6	166	253	242	117	256	288	2918	2777	2541	1874	2597	4385	3688	2882	2310	2959	3319	1929	658	629	1068	993	1379	646	1634	792	1925	2649	4085	2599
PCHAS_0409600	397	306	717	588	390	231	169	219	397	102	115	552	207	2	188	414	251	79	284	346	2133	1872	1769	1566	1868	3177	2398	2144	1535	2240	3224	1551	1150	996	1868	1896	1872	1158	690	478	1434	2052	2828	2387
PCHAS_0409700	327	267	551	482	332	192	109	167	308	85	114	443	151	5	177	346	205	60	279	302	2052	2543	1923	1632	2059	3130	2468	2095	1573	2066	3211	1621	1187	1182	1873	1789	1798	1181	908	736	1493	2158	2792	2392
PCHAS_0409800	187	115	362	276	127	126	79	180	264	69	120	756	64	10	116	129	112	42	97	110	335	377	340	440	643	725	868	652	434	1175	1904	767	2465	1521	3342	3307	3197	1524	152	215	408	348	473	305
PCHAS_0409900	273	319	448	393	275	135	120	174	256	65	59	169	86	11	123	283	207	75	234	293	536	988	766	820	1070	931	964	832	575	1154	613	522	367	403	546	488	654	336	274	205	484	1002	594	771
PCHAS_0410000	663	965	1146	1070	732	429	340	444	606	188	164	389	210	14	384	717	555	247	640	699	873	1529	1202	1559	1810	1500	1760	1259	908	1831	927	944	480	542	811	621	1130	478	325	187	789	1660	887	1333
PCHAS_0410100	282	323	611	501	290	160	137	158	211	64	47	157	79	7	115	258	222	72	243	288	998	1386	1187	1598	2000	1789	1799	1442	1102	1850	1193	914	456	527	611	635	929	363	274	141	486	1512	967	1145
PCHAS_0410200	1477	1800	2541	2180	1417	910	829	889	1273	501	301	659	200	31	416	898	822	301	1143	1304	3344	3667	2596	4369	6878	6614	6916	5652	3592	7432	5417	3695	1794	2433	2955	2330	3396	1761	445	479	952	2640	2382	2810
PCHAS_0410300	539	564	185	102	65	47	28	120	115	14	94	476	297	65	522	1006	908	571	211	157	102	287	205	271	143	145	52	53	41	60	28	34	419	188	363	1681	1300	629	80	73	145	355	338	84
PCHAS_0410400	1300	1476	2705	2114	1112	536	432	370	564	380	201	1066	1607	52	1307	2817	2148	912	1946	1498	11608	7953	6977	4844	5144	8518	5739	4833	4029	3828	4115	3060	599	756	1130	1923	2328	1989	5735	2944	8710	8714	16500	9919
PCHAS_0410500	184	145	353	264	133	82	57	53	106	33	23	78	15	3	22	63	51	19	76	123	347	267	248	522	906	1011	1350	1094	627	1497	1076	882	201	287	360	453	578	231	160	119	247	256	361	294
PCHAS_0410600	333	650	184	77	50	68	25	48	50	36	91	474	275	118	678	1413	1497	961	255	108	66	90	92	119	63	208	74	65	48	95	81	97	112	90	299	383	262	156	32	56	63	84	139	41
PCHAS_0410700	1255	1268	1907	1529	1157	1105	957	1568	2053	670	738	2278	164	25	417	345	318	129	535	858	1213	1132	765	2190	3517	4565	5580	4420	2423	8016	7678	4837	6408	5194	9103	6413	8990	4055	337	409	742	732	1114	805
PCHAS_0410800	72	64	142	97	54	40	17	30	50	16	18	52	13	1	17	66	46	11	38	63	413	316	335	364	448	721	704	523	442	613	514	387	142	161	183	151	236	114	61	44	107	276	413	358
PCHAS_0410900	309	406	487	442	303	161	207	148	175	189	47	87	25	1	67	108	106	48	186	298	442	358	248	371	644	1034	1224	879	612	1105	894	772	159	240	281	182	233	136	54	46	92	219	341	276
PCHAS_0411000	411	429	665	527	358	237	297	298	331	208	116	350	131	16	241	413	331	144	337	333	1525	1226	1179	1194	1454	2463	2080	1704	1248	2161	2702	1404	1078	1057	1654	1629	1997	973	361	280	765	1310	2051	1534
PCHAS_0411100	168	201	196	188	135	132	157	221	199	104	56	201	39	9	74	94	96	35	126	116	201	258	179	265	334	464	616	463	254	978	1065	530	423	429	756	782	1082	446	83	73	200	231	380	169
PCHAS_0411200	833	480	1695	1104	663	466	230	510	945	158	289	938	105	9	115	283	142	38	371	418	2826	2140	1701	2727	3516	7167	7265	5175	3440	7974	8810	5370	3637	2655	5290	3219	4773	2149	317	248	622	1148	2362	1826
PCHAS_0411300	111	121	45	43	37	295	264	666	578	334	385	1846	80	21	355	127	195	87	23	50	262	280	207	192	137	217	132	127	85	456	5106	514	6418	5010	8662	7294	7483	4565	394	604	921	373	970	289
PCHAS_0411400	1221	1373	1934	1659	992	829	617	1015	1375	497	541	2982	797	45	1243	1592	1333	543	1052	1147	3958	4585	4812	4346	4694	5226	4443	3864	2838	4253	5610	2719	4709	3930	6175	15220	11826	7623	3120	2461	5702	6738	5934	5795
PCHAS_0411420	6	7	6	7	5	5	5	13	8	5	1	1	1	0	5	6	4	3	1	3	10	14	6	3	5	8	16	12	6	22	34	16	6	9	16	8	22	20	16	4	29	18	21	18
PCHAS_0411440	11	8	11	16	4	7	16	13	15	4	4	7	0	0	1	5	2	1	3	8	10	3	2	6	10	2	14	16	9	36	30	21	13	9	18	19	33	15	3	3	3	3	8	5
PCHAS_0411500	5226	6495	9239	8163	5354	3251	3098	3408	4626	2680	1364	4237	2298	102	3369	5483	4602	1722	5324	5719	21834	24275	18410	14779	17519	26370	23356	18733	14012	20235	20838	14955	5991	5542	9363	7651	10746	6991	9512	5870	14721	23085	26428	24155
PCHAS_0411550	3	2	3	3	3	1	3	2	1	1	2	1	3	1	4	12	4	3	2	4	5	10	6	9	6	10	10	1	4	8	7	2	2	2	0	14	8	9	7	7	15	11	7	5
PCHAS_0411600	243	253	407	352	232	145	103	135	234	62	56	124	50	0	99	199	149	39	181	214	631	671	620	650	755	1265	1155	998	693	1253	1069	800	288	288	432	290	401	178	82	65	185	530	665	698
PCHAS_0411700	1005	1270	1564	1437	993	670	668	781	1061	441	261	603	268	19	476	858	756	305	786	983	2396	2817	2405	2718	3514	4165	4220	3586	2334	4430	3600	2732	1227	1390	1945	1162	1914	942	516	362	1089	2785	2614	2950
PCHAS_0411800	95	85	164	140	86	66	53	92	111	28	46	131	19	2	42	48	37	8	52	79	329	320	229	376	570	745	803	615	444	915	1044	584	608	506	809	600	793	363	53	55	97	190	302	246
PCHAS_0411900	97	105	190	146	78	65	56	103	119	41	41	166	24	1	37	67	46	15	52	77	266	244	213	310	390	631	582	495	306	637	822	417	444	312	688	422	659	258	56	40	129	224	328	276
PCHAS_0412000	171	202	281	277	175	119	108	124	166	66	53	103	40	3	97	113	111	39	98	186	505	727	599	663	952	1099	1187	936	548	1240	952	750	309	367	495	327	536	254	192	100	315	688	614	699
PCHAS_0412100	132	170	223	208	113	58	50	55	74	36	21	47	16	1	33	85	71	34	87	137	170	303	246	375	492	491	535	416	267	540	268	293	101	112	166	102	203	73	38	19	49	212	130	227
PCHAS_0412200	195	103	76	46	34	16	13	17	38	13	40	231	93	23	200	302	417	153	91	57	64	296	171	195	177	188	48	66	47	82	13	43	172	97	212	309	384	206	22	31	34	114	95	33
PCHAS_0412300	497	501	870	696	463	393	375	449	710	313	255	598	55	8	157	137	136	43	234	371	401	230	156	594	1164	1628	1999	1742	986	2466	3038	1671	1674	1720	2514	1442	1870	1029	107	170	223	163	314	265
PCHAS_0412400	209	204	346	317	210	208	118	291	406	89	158	452	11	3	81	41	53	11	84	130	173	108	79	369	606	698	971	787	471	1576	1520	838	1385	1141	1937	1432	1919	834	71	128	171	111	147	113
PCHAS_0412500	65	51	73	59	36	47	22	39	72	11	13	64	16	7	19	28	26	13	22	30	124	107	77	177	320	328	425	348	200	538	553	306	293	281	365	340	482	214	38	42	75	75	89	79
PCHAS_0412600	835	1078	1492	1262	901	557	577	664	913	474	244	431	115	12	270	471	373	145	610	775	1703	1407	1082	1562	2512	3740	3742	3083	2045	3732	3515	2681	1096	1280	1756	784	1253	708	155	134	294	838	1249	1226
PCHAS_0412700	564	603	928	767	532	382	336	407	704	260	232	830	372	12	496	694	585	263	501	490	2759	2763	1951	1668	2145	2890	2575	2166	1496	2582	3509	1856	1679	1441	2134	1918	2185	1427	2064	1059	2257	2825	4034	2775
PCHAS_0412800	55	63	85	67	63	59	48	80	106	25	37	124	10	1	25	26	19	13	24	33	133	105	85	141	227	367	498	305	235	607	827	395	343	295	621	439	660	277	27	34	82	90	152	103
PCHAS_0412850	230	277	366	341	245	192	181	280	323	94	105	335	42	6	98	160	172	46	154	201	467	639	589	858	1198	1227	1289	1052	697	1713	1641	857	1467	1341	1761	1951	2492	949	155	200	348	590	474	497
PCHAS_0412900	61	75	74	67	60	42	42	82	96	23	38	119	5	2	26	24	21	10	24	36	73	48	77	170	158	189	228	178	104	340	383	173	218	142	419	379	502	134	13	6	48	82	85	84
PCHAS_0413000	1052	1278	1740	1586	958	506	483	444	637	403	175	850	836	18	879	1382	1204	528	1049	1165	5362	4469	4177	2985	3388	6185	4604	3816	3038	3713	3892	2713	620	776	1177	1618	1967	1712	3009	2095	5275	5108	8351	6067
PCHAS_0413100	605	558	1211	921	529	305	225	306	500	183	193	861	479	6	417	735	548	211	590	484	4227	4169	3473	2756	3151	4719	3890	3132	2511	3300	4135	2252	1400	1156	2307	2220	2576	1697	2497	1649	3738	4252	6651	4629
PCHAS_0413200	83	59	168	108	56	39	43	43	95	33	30	242	49	1	71	91	70	33	59	55	699	541	510	410	463	688	679	505	406	635	812	401	289	230	519	733	706	543	463	401	866	672	1159	784
PCHAS_0413300	10	10	9	11	9	4	5	8	9	3	6	18	10	1	10	26	10	7	7	12	15	23	26	23	34	33	18	20	15	20	34	20	17	19	14	22	31	18	25	14	21	28	22	33
PCHAS_0413400	9	5	2	3	1	5	3	6	7	3	6	107	15	3	24	13	14	7	4	4	14	15	12	13	9	7	13	13	4	13	63	9	306	97	372	930	533	256	26	28	48	39	32	15
PCHAS_0413500	327	354	591	550	330	216	142	192	346	95	98	319	56	3	132	299	206	70	252	289	1160	840	986	1009	1043	1785	1882	1285	1047	1663	2044	1175	511	448	908	813	890	436	181	123	386	841	1357	1187
PCHAS_0413600	95	58	114	66	91	124	91	148	220	51	59	170	21	2	25	50	31	25	24	24	50	59	27	25	43	96	429	233	96	796	1041	632	371	324	580	414	642	313	38	29	55	30	123	39
PCHAS_0413700	1444	1930	2499	2230	1488	1031	1054	1118	1545	868	424	1169	744	30	915	1398	1271	532	1257	1479	5170	5493	4442	3746	5010	8138	7099	5828	3951	6612	7470	4872	2010	2117	3327	2651	3576	2313	2788	1640	3964	5574	7357	5952
PCHAS_0413800	39	60	16	23	16	13	12	12	9	3	10	46	34	14	57	96	101	70	15	34	20	38	35	44	48	50	37	37	12	34	25	22	22	25	60	69	74	64	17	14	47	50	51	43
PCHAS_0413900	243	219	405	364	224	155	110	270	342	90	117	445	87	8	151	214	163	58	148	195	719	1092	782	751	1045	1448	1390	1017	821	1455	1992	1028	1247	1101	1976	1306	1844	908	419	297	606	928	905	842
PCHAS_0414100	480	411	919	722	477	364	164	447	718	157	253	1155	154	7	212	429	243	78	320	412	2074	2498	2012	1909	2430	4016	3745	2702	2082	3774	5464	2679	3183	2498	5196	3278	4358	2361	854	673	1607	2256	2651	2621
PCHAS_0414200	513	453	1002	782	478	245	195	223	352	154	81	187	34	5	73	155	128	39	289	474	950	592	505	1104	1548	2800	2580	2031	1416	2656	2062	1679	455	442	830	501	764	346	54	33	115	264	581	561
PCHAS_0414300	56	99	23	17	7	15	13	37	40	18	12	95	118	22	132	197	244	143	57	20	64	171	121	89	29	92	24	21	12	38	32	25	249	61	249	975	663	375	23	23	71	76	371	38
PCHAS_0414400	375	560	634	570	423	261	291	280	341	206	103	366	243	15	342	406	420	184	371	432	1214	1853	1159	1011	1275	1709	1686	1232	902	1540	1387	1005	520	516	909	884	1147	759	897	700	1385	1759	1741	1505
PCHAS_0414500	534	512	982	828	437	304	224	307	421	177	143	568	340	12	307	511	294	111	410	468	2330	2165	2018	1747	1851	3106	2753	2278	1587	2889	2836	1794	815	622	1436	1350	1772	1248	1049	688	2150	2588	3393	2855
PCHAS_0414600	25	21	38	35	16	20	19	22	10	4	7	46	34	1	31	43	42	19	23	16	160	193	137	99	130	206	120	131	118	101	174	86	82	75	85	89	113	102	122	66	146	212	274	203
PCHAS_0414700	38	42	48	45	31	12	22	21	26	23	7	14	7	0	12	17	16	12	14	22	37	26	16	49	103	130	227	161	118	187	178	138	33	76	57	65	79	41	10	5	9	14	37	26
PCHAS_0414800	262	241	555	424	266	175	110	168	261	73	65	145	16	2	43	81	52	24	112	195	331	206	161	608	890	1343	1575	1269	770	1944	1548	1260	400	363	772	533	817	313	39	30	97	126	232	194
PCHAS_0414900	618	793	1100	932	703	490	378	659	848	226	202	572	62	7	147	215	201	57	325	556	882	823	552	1888	3331	3175	4030	3378	1959	5631	4263	2812	2582	3008	3527	2627	3819	1960	225	374	547	601	615	650
PCHAS_0415000	568	672	905	753	551	403	363	441	562	278	163	492	65	7	196	231	221	106	274	480	777	661	384	1129	2224	2659	3114	2462	1519	3370	3500	2076	1486	1647	2136	1728	2248	1177	213	219	370	366	670	424
PCHAS_0415100	462	541	854	677	443	242	199	266	296	119	86	143	30	6	80	138	126	43	269	392	339	246	221	992	1370	1375	1560	1233	760	1842	958	915	383	457	656	477	778	308	32	22	102	177	177	251
PCHAS_0415200	152	122	141	106	97	152	97	262	318	90	189	822	39	9	153	73	72	35	43	76	129	154	105	169	235	393	442	329	189	697	1498	442	2233	1325	3109	2893	2869	1409	102	163	219	167	305	160
PCHAS_0415300	1623	2235	3195	2554	1481	1588	1694	2214	2586	1740	1372	4075	729	74	1859	2341	2198	874	2189	1989	9259	6701	6052	5256	5855	9095	7390	6729	5016	5992	13710	5059	8440	8552	12038	8912	11601	6061	2357	2334	5283	6416	11635	8685
PCHAS_0415400	1535	1864	2728	2403	1403	686	661	571	771	460	221	911	950	42	1226	2178	1852	720	1764	1695	8146	7366	6494	5069	6271	9524	7319	6635	4846	5331	5480	3665	851	1280	1691	1482	1985	1539	3751	2372	7137	8284	11557	9493
PCHAS_0415500	4837	6015	9157	7738	4987	2858	2777	2858	3860	2385	1151	3652	2698	82	3573	5245	4551	1848	5049	5297	21182	24912	17607	13765	17360	26997	21677	18124	13204	18766	17987	13814	5307	5199	9270	7123	9705	6978	11542	6683	15222	22538	27702	23548
PCHAS_0415600	580	521	819	689	348	180	144	155	229	74	100	1547	1156	29	902	1045	831	334	619	524	3186	5423	4111	3438	3990	3395	2493	2206	1762	1970	1473	1146	705	751	772	8951	6923	8542	6114	5210	8020	8615	6245	5877
PCHAS_0415700	426	495	733	607	384	327	351	502	474	426	272	947	395	10	637	684	745	303	566	481	3225	3452	2511	1651	2038	2753	1769	1712	1413	1230	2857	1019	1891	1569	2900	2405	2671	1930	1946	1498	2962	3621	5300	3535
PCHAS_0415800	20	15	9	5	6	2	2	7	6	4	8	34	9	4	28	34	34	25	12	6	21	55	27	39	16	38	10	7	8	14	10	17	29	32	42	58	91	37	15	6	15	37	29	15
PCHAS_0415900	217	209	325	229	181	193	167	280	442	108	222	742	72	10	137	147	121	51	83	137	152	210	147	234	320	456	804	542	270	1240	1394	739	1459	931	1920	1508	2027	938	63	80	162	155	228	135
PCHAS_0416000	39	46	44	44	34	60	54	78	122	31	47	173	9	0	23	19	19	9	9	18	54	36	31	54	92	132	274	198	90	474	806	260	671	418	823	668	869	330	21	34	63	39	103	48
PCHAS_0416100	112	113	121	109	94	139	167	232	298	163	159	551	24	8	130	82	86	37	47	72	109	106	84	86	126	209	339	252	135	464	1179	421	1041	789	1338	1461	1356	693	94	141	171	97	278	97
PCHAS_0416200	410	477	754	593	454	260	176	374	502	146	151	806	81	16	274	381	309	122	334	376	757	935	903	1335	1600	1574	1522	1206	850	1566	1548	880	1882	1296	2353	2770	2946	1407	227	233	441	905	733	869
PCHAS_0416300	347	319	315	280	289	758	644	1736	2044	495	1068	3448	135	13	500	207	255	85	97	175	317	315	221	286	381	504	922	676	311	2160	5698	1503	8722	7494	11335	8034	9962	4797	311	464	658	401	627	318
PCHAS_0416400	2472	2647	3906	3158	2276	1588	1454	2213	2668	905	866	1891	397	38	771	1354	1231	455	1600	2023	3919	5773	4877	6909	9567	9653	9964	8550	4862	12322	9804	6582	5659	6181	8682	5959	8795	4095	829	663	1500	5279	3703	5018
PCHAS_0416500	893	1099	1404	1281	865	512	527	711	914	279	250	803	391	21	540	808	726	276	668	831	2123	3080	2422	2803	3693	3452	3396	2893	1911	4005	3096	2024	1772	1972	2461	2025	2874	1669	1047	833	1681	3560	2444	2830
PCHAS_0416600	196	227	251	199	154	261	262	414	501	270	198	669	65	10	189	140	149	71	107	136	306	349	226	295	395	552	652	541	310	941	1952	682	1520	1296	1950	1612	1782	946	184	207	314	317	491	317
PCHAS_0416700	13	7	17	11	7	5	3	7	11	2	7	29	4	2	14	12	21	8	9	9	37	136	111	114	107	142	59	62	32	119	55	55	72	57	123	124	175	87	16	16	33	79	74	23
PCHAS_0416800	5	8	10	10	7	10	3	7	26	2	9	140	16	0	7	2	5	0	0	1	42	22	29	17	21	82	65	57	31	197	560	127	430	210	669	2157	1249	800	122	264	247	61	293	55
PCHAS_0416900	14241	18564	13417	14297	17422	21014	22110	37435	40767	15112	14568	42166	2093	378	8375	2485	3559	1338	2139	8071	4856	4163	2580	4800	12185	21917	55530	42046	15585	108398	140508	62938	152431	160723	188154	141184	177483	102685	9038	16854	17915	8884	12334	6090
PCHAS_0417000	143	93	105	77	34	25	10	39	25	13	32	175	69	9	112	175	206	68	67	35	170	953	586	812	884	638	230	262	134	213	82	154	696	643	544	1052	1426	823	168	232	273	839	379	185
PCHAS_0417100	412	414	851	731	352	168	101	133	222	57	61	452	402	11	289	622	436	168	388	395	1098	1883	1720	1841	2094	1866	1740	1555	1095	1761	904	923	304	415	481	1089	1299	1106	1129	748	1930	3057	1690	2090
PCHAS_0417200	1069	1426	1614	1527	969	729	616	1364	1401	376	577	2145	820	43	1066	1587	1338	565	1081	1136	2408	3787	4118	4499	4802	4294	3200	3131	2027	3890	4297	2249	5255	4368	6835	6163	7635	3843	1838	1099	3116	6911	3552	4595
PCHAS_0417300	237	247	463	352	277	217	161	256	416	103	133	425	37	5	65	37	57	16	95	180	440	242	160	500	962	1685	2250	1605	899	2942	3422	1816	1648	1150	2387	1761	2496	1082	122	88	190	172	382	191
PCHAS_0417400	1396	1695	2368	1926	1564	963	691	1573	1648	318	414	897	89	17	207	278	250	79	590	996	609	402	314	2157	4699	3887	5024	4292	2516	6786	4418	3241	3525	4071	4200	3886	6259	2551	307	347	616	575	361	421
PCHAS_0417500	446	375	482	360	394	527	385	856	1316	301	552	1894	103	15	301	204	204	79	115	215	215	331	186	242	442	745	1691	1223	458	3388	4268	2092	5015	3895	7023	4590	6072	2972	251	369	443	276	514	190
PCHAS_0417600	325	317	340	344	277	387	373	620	874	323	360	1474	51	6	243	123	156	55	130	220	721	611	399	550	904	1427	1933	1445	805	2498	6765	1884	5178	3635	6568	5253	6181	3041	434	464	695	459	1345	582
PCHAS_0417700	2700	3299	4108	3768	2568	1748	1627	2135	2744	860	804	2623	1637	60	1745	2641	2091	933	1958	2429	4800	5465	6048	7321	7803	9842	9071	7439	5052	11640	9522	6432	4244	4950	6868	6351	8276	4887	3059	2199	5175	8694	6220	7281
PCHAS_0417800	233	203	397	318	229	100	77	98	201	66	48	151	68	2	80	163	113	37	159	191	1111	932	836	674	895	1684	1597	1149	866	1483	1724	1074	276	382	566	459	596	338	518	333	810	943	1692	1221
PCHAS_0417900	344	328	581	505	300	207	222	232	283	128	86	513	437	5	331	485	388	144	311	305	3118	3094	2628	1932	2350	3592	3158	2540	1818	2740	3402	1818	956	1139	1472	1861	2230	1937	3232	1857	4509	3796	6002	4221
PCHAS_0418000	23	11	21	16	17	25	19	31	52	15	17	55	5	1	8	8	8	7	5	12	20	32	21	14	17	34	69	38	19	110	253	83	77	94	160	134	211	89	22	26	49	23	45	25
PCHAS_0418100	700	1155	386	174	103	115	35	90	146	55	145	917	513	191	1077	2574	2430	1497	440	175	73	120	122	168	53	246	78	35	40	101	77	81	128	120	407	562	278	185	41	55	80	100	125	46
PCHAS_0418200	1479	1534	2471	2039	1376	780	609	846	1216	333	306	812	317	29	580	1200	878	381	1050	1257	2000	3317	2757	3561	4930	3736	4300	3639	2373	5159	2880	2467	1384	1938	2578	1731	2512	1327	690	514	1445	3543	1884	3058
PCHAS_0418300	736	732	1187	950	642	695	614	1205	1479	574	761	2671	337	20	713	845	699	257	626	638	1954	3139	2446	2254	2488	2824	2251	1983	1568	2247	4488	1827	6366	4228	8001	4398	5788	2997	588	442	1151	2744	2414	2680
PCHAS_0418400	4286	5173	7689	6408	4032	2396	2311	2645	3308	1728	1028	3149	2302	81	3232	4965	4163	1607	4470	4479	15614	22899	14839	11170	14291	20516	16340	13273	10515	13024	11979	9820	4211	3975	6315	5242	7598	4965	9181	4971	11146	19622	19399	18336
PCHAS_0418500	551	522	214	133	61	57	21	50	78	19	106	754	320	98	604	1450	1215	788	232	117	84	137	178	232	143	251	130	98	74	137	59	100	468	403	890	1056	1038	545	78	113	137	249	190	74
PCHAS_0418600	342	404	341	326	347	369	461	538	659	400	224	437	54	20	184	138	165	111	85	188	187	192	111	192	347	756	1348	1010	466	2018	3061	1570	1099	1237	2035	1708	2012	942	107	156	275	196	459	151
PCHAS_0418700	57	75	61	30	47	43	28	76	52	32	60	1067	90	14	321	150	159	72	36	36	61	93	109	72	64	48	55	38	22	84	256	55	1863	762	1958	5855	4023	2809	183	367	344	282	278	166
PCHAS_0418800	1033	1199	1564	1535	1007	737	629	1077	1420	382	518	1866	604	20	820	1168	974	363	727	974	2044	2892	2946	2988	3195	3225	3106	2558	1812	3753	3625	2050	3631	2719	4859	4300	5153	2739	1655	1090	3000	4434	2830	3576
PCHAS_0418900	1908	1712	3812	2862	1663	628	300	629	890	126	222	1024	1110	33	954	2339	1507	499	1779	1773	5708	11790	10169	13403	16038	11096	8572	8183	5872	7594	3770	3730	1855	2752	2419	2841	4354	2765	3751	2520	6391	17474	6985	10394
PCHAS_0419000	493	366	159	142	309	1192	642	2822	2732	379	1253	4839	169	32	594	237	271	93	65	170	365	288	240	270	297	204	707	356	151	3245	7241	2098	15479	15046	16732	15763	20136	9778	750	1215	1507	821	692	453
PCHAS_0419100	1092	1446	1537	1301	1109	1141	1322	1738	2185	1129	833	2610	213	48	776	806	840	421	707	889	1561	1331	869	1545	2367	3827	4178	3288	1939	5203	8879	3736	5887	4641	7985	6727	8127	3785	499	460	817	769	1907	1009
PCHAS_0419200	838	802	1477	1151	786	469	319	459	791	281	205	837	471	9	389	785	549	173	567	707	3721	4311	3164	2706	3670	5297	5105	3980	2730	4779	5854	3443	1531	1816	2685	2100	2788	1783	2094	1217	2840	4071	5246	3980
PCHAS_0419300	96	92	172	110	76	45	64	66	121	41	25	99	42	2	51	70	60	23	53	68	393	442	368	421	500	771	698	561	443	690	708	526	304	246	389	693	745	560	236	246	366	341	569	462
PCHAS_0419400	29	14	7	14	6	10	3	13	3	3	52	1096	568	12	492	115	108	124	8	32	600	263	338	122	81	86	68	83	73	18	59	34	106	83	145	5788	4457	5224	1661	1790	2897	1179	3033	1292
PCHAS_0419500	40	44	12	11	31	236	196	390	436	135	142	435	28	4	66	17	35	12	7	17	4	2	0	0	0	0	1	2	0	10	137	26	146	144	188	91	171	79	3	6	11	3	8	3
PCHAS_0419600	594	712	777	836	781	575	478	587	647	287	91	212	57	9	82	102	115	34	149	335	25	53	34	53	115	215	246	286	108	398	428	226	112	122	153	57	158	71	14	8	22	67	36	42
PCHAS_0419700	294	370	492	515	409	298	234	284	336	124	43	110	19	7	33	56	74	21	80	225	12	12	6	24	60	82	83	70	44	171	125	74	52	58	87	44	63	27	1	2	6	10	14	14
PCHAS_0419800	179	259	243	277	236	124	115	131	127	58	10	25	10	0	14	21	24	10	36	105	2	2	1	4	12	9	10	11	7	16	13	8	3	2	6	4	0	2	1	1	2	1	0	1
PCHAS_0419900	134	157	162	185	213	153	167	171	191	77	34	43	5	1	22	17	17	10	33	76	3	0	0	0	2	5	3	10	0	11	6	3	2	1	11	6	8	2	2	0	3	1	2	0
PCHAS_0420000	8	6	2	1	8	68	28	102	86	33	44	163	5	3	20	6	5	6	0	1	0	0	0	0	0	0	0	0	0	1	8	0	11	8	16	37	16	8	1	0	1	2	4	1
PCHAS_0420100	349	442	342	380	421	384	473	375	454	267	74	120	13	1	41	22	30	9	42	171	4	1	2	0	6	24	23	26	6	44	72	24	13	27	44	16	43	16	4	2	6	7	8	1
PCHAS_0420200	211	244	198	239	242	239	260	263	348	191	61	91	10	3	32	16	20	8	27	84	1	2	0	0	2	4	3	5	4	10	12	6	12	6	10	11	14	4	0	0	1	1	1	2
PCHAS_0420300	9	6	0	1	3	57	42	107	94	44	25	122	8	1	22	5	3	3	0	2	2	0	1	0	0	0	0	0	2	1	24	2	45	24	74	41	46	24	3	4	2	0	3	1
PCHAS_0420400	84	103	158	133	80	35	28	27	34	17	16	294	220	4	236	248	184	85	111	105	472	521	480	286	257	370	248	217	168	138	171	129	40	51	57	596	570	695	705	608	1018	859	1237	803
PCHAS_0420451	4	0	0	2	3	6	4	8	14	2	9	64	6	0	7	2	5	0	0	0	23	14	8	14	2	13	5	8	3	5	126	11	188	83	267	304	299	118	37	22	32	16	59	16
PCHAS_0420500	79	67	61	87	32	27	17	19	26	10	27	811	527	6	433	319	210	154	72	92	613	515	471	220	168	184	119	96	83	59	158	53	181	133	254	2032	1788	2036	2196	2003	2975	1281	2487	1255
PCHAS_0420600	81	116	208	173	84	35	13	20	27	16	18	497	449	0	273	340	238	84	227	128	250	367	271	129	162	167	116	88	88	73	53	50	11	9	14	357	274	360	432	253	567	443	473	385
PCHAS_0420700	43	34	37	38	36	45	39	47	66	31	24	47	3	2	13	24	11	13	8	24	16	28	20	35	46	105	178	163	56	308	326	221	289	186	467	136	236	121	9	11	29	28	25	22
PCHAS_0420800	224179	305627	516170	399747	253864	167122	196085	142628	207881	171743	70732	143399	64453	5613	125293	248544	219232	79368	252052	264463	8793	6535	5071	5514	7464	13317	8648	9710	6400	8043	9446	5056	2760	4298	3467	2399	4797	2133	757	504	1658	5150	10619	6353
PCHAS_0500100	45	48	13	30	18	13	23	34	47	17	76	458	476	9	324	204	165	103	28	43	587	498	433	174	147	150	87	90	79	40	119	38	145	111	160	1555	1386	1676	1705	1477	2000	1078	2138	1090
PCHAS_0500200	23	15	12	10	14	85	53	126	133	50	58	167	5	1	22	9	6	9	3	8	9	0	2	1	2	6	3	6	2	26	77	23	76	61	156	54	148	51	5	4	9	8	13	5
PCHAS_0500300	151	127	189	210	89	52	45	30	47	25	20	330	369	10	304	326	250	130	163	132	1059	1341	1063	689	695	848	606	577	431	416	345	338	87	109	128	686	766	921	1662	1107	2131	1925	2464	1835
PCHAS_0500400	5	7	14	8	10	7	10	11	13	5	3	8	3	0	3	5	1	1	3	11	39	48	32	29	36	52	53	53	32	80	73	46	64	54	118	74	129	69	57	36	90	41	82	35
PCHAS_0500500	566	611	834	826	416	250	163	219	307	107	129	2166	1239	30	1073	1135	790	412	521	573	1405	1981	2050	1777	1723	1551	1292	1094	862	1320	740	677	666	541	891	10908	7710	6904	2470	2142	4218	3991	3065	3075
PCHAS_0500600	3	1	5	6	2	0	2	4	5	1	3	9	3	0	0	6	5	1	1	3	27	14	15	14	9	19	21	18	3	25	43	15	10	19	18	65	62	41	105	89	215	21	80	25
PCHAS_0500700	2	4	0	1	3	33	23	49	59	32	31	90	3	2	14	1	5	0	0	1	4	2	1	3	2	0	1	1	3	10	112	17	191	158	184	122	168	69	5	9	5	4	20	3
PCHAS_0500800	208	244	227	213	171	248	315	482	670	239	233	684	93	13	205	179	178	91	97	128	265	249	230	301	401	587	657	609	310	1119	2777	873	1644	1477	2276	1617	1963	1068	129	161	281	244	554	367
PCHAS_0500900	548	682	444	495	518	775	891	1213	1389	791	496	1032	59	16	252	152	161	64	137	305	453	359	268	382	677	1122	2207	1419	667	3967	7223	2915	3152	3942	4962	3286	5262	2524	337	399	552	362	844	438
PCHAS_0501000	13	15	9	7	6	2	0	8	11	0	22	907	110	3	204	45	43	31	8	9	192	116	165	79	96	29	31	30	14	25	61	17	857	221	483	15646	10136	9351	1347	1878	1983	907	630	378
PCHAS_0501100	4	3	5	8	2	3	1	1	1	3	2	15	18	0	9	14	4	6	6	5	56	46	40	33	22	46	22	18	20	6	15	16	8	5	6	83	69	46	48	27	54	57	106	54
PCHAS_0501200	96	76	16	47	21	35	26	67	36	48	227	7574	2088	123	3345	633	573	564	53	94	3143	1713	1822	579	427	417	251	317	280	90	467	140	2881	947	3164	109603	74429	66671	16866	22083	27047	6767	18133	5668
PCHAS_0501300	14	15	4	7	7	10	12	14	9	5	14	12	1	1	5	10	10	11	3	16	1	5	5	4	15	18	19	15	7	34	33	18	8	17	15	34	38	17	8	14	19	12	8	7
PCHAS_0501400	884	953	982	889	980	933	814	1416	1636	498	441	870	96	15	238	149	198	75	137	473	234	271	217	450	845	1742	3804	2786	1165	7116	6593	4023	2855	2987	5149	2602	3894	1830	153	218	319	274	450	273
PCHAS_0501500	16	7	6	14	6	6	2	13	12	3	27	815	56	2	63	31	18	9	3	6	187	124	119	54	56	51	54	45	38	47	638	42	1898	707	3011	10160	5791	3835	431	531	592	350	1240	248
PCHAS_0501600	441	502	803	687	454	257	181	236	366	113	78	238	41	5	87	162	112	33	260	391	591	501	444	1135	1723	2103	2376	1903	1209	2957	1536	1532	490	533	928	646	959	412	49	63	142	319	384	419
PCHAS_0501700	116	116	41	23	15	18	6	18	18	2	38	554	91	32	235	353	272	172	43	30	26	28	47	38	11	25	16	2	9	14	17	10	224	61	404	2433	1118	761	62	93	135	71	145	55
PCHAS_0501800	299	362	348	258	269	299	377	490	713	237	226	472	50	12	139	126	121	69	78	170	137	127	108	160	274	478	1038	749	299	1906	2611	1365	1349	1202	1918	1290	1780	901	112	140	194	140	250	93
PCHAS_0501900	55	60	69	49	32	36	17	35	64	11	63	1853	304	25	614	179	179	104	25	48	297	270	296	154	210	290	228	222	162	248	337	174	465	242	786	14651	6623	5154	1351	1538	1743	436	1792	403
PCHAS_0502000	619	612	996	864	563	397	323	583	725	209	275	787	169	9	336	546	393	155	411	545	1272	1289	1316	1610	1809	2453	2604	1902	1393	2592	2432	1420	1671	1196	2383	1697	2186	1041	441	303	1126	1547	1510	1697
PCHAS_0502100	139	197	73	35	19	22	3	15	37	8	31	234	119	34	200	529	415	247	98	27	18	28	27	30	16	46	14	6	11	18	14	15	28	25	100	121	42	35	8	9	12	19	19	9
PCHAS_0502200	239	281	493	278	227	96	90	109	152	41	28	82	69	8	133	247	202	64	267	265	620	1174	883	1322	1673	1336	884	1092	643	1031	545	558	239	251	393	224	340	157	91	43	114	903	459	673
PCHAS_0502300	1319	1361	2405	1759	1270	942	802	1206	1725	586	464	1148	147	11	321	480	412	131	694	982	2688	2654	2038	3471	5104	7295	8769	6574	3857	10400	9780	6332	3629	3805	6183	4033	6709	3047	443	371	884	1775	2345	2371
PCHAS_0502400	239	218	414	338	186	107	55	107	148	49	35	97	17	5	37	104	74	24	166	168	245	244	257	513	542	602	679	489	287	783	402	399	172	157	281	226	412	160	29	22	53	220	189	269
PCHAS_0502500	70	79	148	120	71	33	14	21	63	8	11	51	8	1	13	45	34	8	61	50	170	231	174	304	441	398	454	344	233	528	278	233	143	150	188	208	320	116	41	19	54	192	140	172
PCHAS_0502600	724	538	282	178	91	67	47	141	132	63	188	1792	387	107	857	1295	1301	689	249	198	236	253	327	331	290	306	268	165	137	295	780	184	5262	2300	5361	13865	10211	6137	564	866	1077	848	674	350
PCHAS_0502700	1247	1355	2069	1779	1153	960	682	1302	1777	515	777	2534	374	22	771	1047	816	318	962	1100	2452	3230	3116	3723	4464	4410	4528	3642	2310	5619	5957	3149	6503	5566	8557	7981	10031	4886	1103	1048	2348	3757	2889	3466
PCHAS_0502750	174	234	118	30	34	25	7	19	31	11	28	265	126	35	201	652	474	248	93	39	50	63	52	72	27	113	53	25	31	30	32	50	53	42	134	189	81	58	28	32	24	35	74	21
PCHAS_0502800	220	299	403	375	241	100	150	100	123	97	28	98	78	3	134	271	213	112	223	266	1035	1071	711	671	940	1239	1259	896	706	934	898	640	115	173	223	183	288	201	597	271	669	964	1275	935
PCHAS_0502900	238	276	504	367	204	89	43	59	72	29	26	394	336	3	232	421	265	108	257	270	897	1717	1470	1679	1944	1534	1029	1074	795	837	384	433	186	266	275	1332	1554	1804	1208	747	1939	3089	1513	1879
PCHAS_0503000	487	401	1246	790	382	192	90	116	197	51	60	831	683	9	422	934	514	204	540	446	8020	6444	6415	4893	5649	7184	5635	4877	4064	3952	3586	2550	812	908	1247	3409	3703	3146	4932	3215	9111	8132	11660	8301
PCHAS_0503100	14	9	10	10	9	3	0	3	5	0	5	48	61	2	39	55	41	11	7	13	96	282	234	145	99	123	51	55	42	32	28	23	13	13	36	96	86	121	109	76	179	353	258	316
PCHAS_0503200	142	153	203	205	120	63	36	41	57	35	14	56	34	3	66	163	164	64	136	145	359	577	508	493	573	659	602	441	369	452	304	283	72	96	129	135	161	91	129	62	206	509	504	533
PCHAS_0503300	2833	3474	4189	4099	3006	2396	1711	3689	4175	970	1491	4646	803	64	1383	2161	1775	667	1691	2545	3973	8918	6081	8584	13541	9768	9753	8457	5311	13284	10085	6021	15202	14468	16127	12892	16299	8816	2807	2880	5058	10172	4224	6101
PCHAS_0503400	671	608	225	131	53	53	16	50	98	29	170	1262	350	125	801	1532	1314	873	252	153	67	126	134	154	99	125	58	34	28	74	97	51	1110	424	1494	4792	2929	1882	158	237	291	240	236	108
PCHAS_0503500	47	97	45	16	8	9	7	11	13	8	11	102	36	14	96	228	201	124	35	13	16	13	22	29	7	27	15	9	3	9	16	11	37	16	62	245	142	92	15	20	35	18	42	9
PCHAS_0503600	1023	1068	402	226	125	98	29	97	141	37	205	1145	526	174	1181	2512	2276	1540	416	241	61	201	181	338	166	269	133	78	61	187	54	99	390	275	753	935	775	402	77	131	114	226	125	57
PCHAS_0503700	3384	4369	6058	5001	3236	1977	2117	1902	2337	1744	754	2224	1552	65	2445	3647	3261	1331	3580	3615	12933	17329	11045	8437	10635	16250	13218	10491	7728	11185	11279	8102	2980	2782	5292	4107	5921	3713	7046	3514	8001	13966	17639	13317
PCHAS_0503800	883	979	1409	1116	950	603	513	726	988	310	251	518	65	16	153	213	179	79	326	630	617	366	286	1251	2396	3075	4049	3577	1775	5290	4445	2903	1663	2390	2771	1463	2333	1135	183	221	332	275	377	403
PCHAS_0503900	272	392	201	148	105	79	47	59	85	47	64	285	134	55	290	639	615	365	123	120	62	76	61	160	174	325	303	261	161	397	289	213	108	124	267	277	221	121	26	25	39	52	71	44
PCHAS_0504000	226	298	222	214	231	327	315	527	804	182	300	791	42	8	155	58	74	32	40	118	87	98	77	96	127	248	686	451	221	1386	1740	832	1460	970	1869	1467	2108	890	61	78	154	76	218	60
PCHAS_0504100	404	382	793	595	399	184	92	120	177	71	58	195	81	7	145	364	264	93	322	364	944	1473	1281	1625	1888	1841	1783	1367	1077	1638	1078	856	309	398	512	608	873	412	231	147	505	1333	888	1251
PCHAS_0504200	86	69	128	96	68	38	39	32	62	35	11	220	27	4	64	65	48	27	46	62	169	73	81	161	256	499	491	342	270	474	602	299	464	243	796	2256	1289	856	68	170	207	79	390	118
PCHAS_0504300	737	851	1166	1070	513	188	133	89	138	92	62	625	568	19	815	1063	929	436	918	769	1355	3935	2019	1978	2607	1462	1382	1188	923	1086	404	592	113	216	191	1238	1192	1232	1950	1710	2361	4372	1579	2356
PCHAS_0504400	32	41	22	12	14	6	4	5	7	2	12	44	28	8	62	78	106	61	40	14	83	258	138	93	72	107	41	39	26	34	6	28	29	23	60	85	69	45	12	12	61	90	195	51
PCHAS_0504500	503	692	296	113	73	76	17	66	86	20	105	681	392	127	759	1790	1620	1052	335	120	20	89	89	141	52	120	37	22	24	74	10	43	150	91	322	517	250	162	29	50	44	92	35	27
PCHAS_0504600	32	31	35	18	15	5	4	9	12	6	9	38	16	6	26	71	46	43	22	24	54	128	73	80	81	112	73	80	50	56	40	29	25	27	31	36	48	34	7	11	13	62	70	48
PCHAS_0504700	246	251	431	342	208	134	91	84	129	83	26	91	50	4	80	192	126	35	136	202	922	1087	802	849	1187	1669	1740	1294	828	1458	1117	907	180	249	402	229	394	174	206	108	298	801	999	973
PCHAS_0504800	92	106	152	168	84	39	32	50	45	18	11	32	18	1	23	63	29	19	71	84	112	114	159	291	301	378	256	244	159	290	186	156	35	76	105	54	97	60	19	17	75	162	100	129
PCHAS_0504900	450	562	716	669	463	205	193	206	247	122	48	169	78	5	165	321	314	133	315	416	726	941	907	1490	1910	1904	1817	1536	970	2060	1021	968	389	508	738	548	842	418	151	129	393	1027	670	975
PCHAS_0505000	441	514	879	784	379	232	145	144	219	100	98	768	530	14	529	754	589	234	512	508	2176	3218	2796	2451	2976	2739	2373	2067	1495	1808	1514	1036	482	534	784	1660	2023	1767	1874	1361	3101	4720	3250	3623
PCHAS_0505100	4	1	0	3	3	0	1	1	2	1	2	1	5	0	1	4	4	6	0	2	1	0	4	1	3	2	2	1	4	1	6	0	4	3	6	6	2	6	2	1	4	9	5	3
PCHAS_0505200	2171	3063	3590	3217	2156	1837	2052	2311	2675	1758	1051	3561	771	59	1629	1967	2036	747	1919	2334	5572	5856	4832	4675	5434	9795	8051	6814	4565	8078	11697	5856	6268	4709	9922	8140	8983	4368	1511	1092	3120	5332	7302	6043
PCHAS_0505300	635	826	947	902	662	716	751	1040	1198	685	418	1127	80	13	316	203	264	75	309	500	755	587	457	755	1198	2189	2456	1929	1207	3180	4714	2343	2693	2153	4180	2605	3807	1624	157	156	296	385	774	548
PCHAS_0505400	277	249	475	426	236	188	155	251	345	71	102	467	83	9	132	246	203	63	212	229	1396	1463	1596	1837	2051	2380	2088	1800	1238	2308	3093	1404	2185	1826	2835	2706	3414	1593	418	364	844	1588	1563	1580
PCHAS_0505500	481	501	483	492	484	568	493	882	1288	306	458	1378	89	15	238	168	163	76	101	273	154	172	108	244	486	509	1355	844	365	2474	2092	1378	2795	2046	3588	2895	4033	1825	144	211	333	188	231	138
PCHAS_0505600	217	271	387	331	180	139	113	194	223	89	118	438	161	4	212	359	323	110	233	265	2224	2065	1931	1472	1621	2532	1817	1680	1330	1513	2911	1069	1964	1667	2440	1858	2184	1290	983	687	1753	2190	3550	2722
PCHAS_0505700	618	804	1018	961	601	442	491	532	740	437	246	781	165	18	373	617	549	203	555	582	2936	1892	2050	2039	2488	4565	4024	3259	2407	3712	6100	2846	2535	2478	3515	2675	3265	1774	535	666	1386	1835	3583	2823
PCHAS_0505800	121	115	215	200	122	48	43	56	97	32	29	216	165	6	124	224	154	70	111	120	722	1158	915	631	696	782	741	595	428	708	626	464	205	201	323	856	920	594	965	617	1390	1512	1329	1251
PCHAS_0505900	308	381	509	431	266	200	197	204	234	180	70	201	70	7	147	218	209	123	235	251	783	841	652	703	953	1465	1525	1090	698	1585	1587	1036	406	486	825	615	761	438	248	185	334	626	883	686
PCHAS_0506000	1125	1128	1935	1693	883	381	197	379	346	87	115	1581	482	44	715	1254	1083	383	1163	1098	3437	8809	5219	7916	14083	6708	4620	4568	3931	3305	1882	1816	7022	3796	4308	33437	22173	17588	2146	3152	3939	9345	3551	5012
PCHAS_0506100	151	131	35	42	58	378	243	861	873	247	649	3821	203	37	788	247	291	154	47	80	243	245	155	146	100	76	63	58	44	218	1930	250	9619	6528	9151	15653	12716	8522	657	1339	1198	699	641	325
PCHAS_0506200	2370	2667	2441	2353	2521	3232	2263	6739	7333	1333	2997	9218	613	66	1671	815	865	342	495	1292	748	745	545	1209	2402	2261	5441	4107	1863	10605	11294	5181	23819	20836	24445	26658	32108	15822	1254	1901	2318	1679	1236	863
PCHAS_0506300	268	193	344	373	172	176	84	260	361	63	205	1467	1083	15	653	889	600	235	319	260	624	899	1069	918	584	612	401	295	288	444	735	282	389	471	749	2028	2227	1684	1052	700	1822	1740	1571	1529
PCHAS_0506400	90	112	181	130	94	40	24	25	56	23	12	94	99	3	73	113	82	38	78	76	650	598	492	333	420	698	671	501	378	474	476	343	59	96	126	294	314	330	618	416	781	652	1051	757
PCHAS_0506500	567	485	1173	928	494	383	271	367	627	186	254	954	236	15	289	549	373	125	451	521	5888	5246	5049	4542	5866	8630	7646	6405	4365	6868	10178	4851	5108	4795	6580	4987	7138	3495	1940	1277	3553	5530	7652	6097
PCHAS_0506600	160	139	273	206	121	66	40	29	66	43	27	169	178	6	147	221	181	109	174	119	1539	1396	1102	823	1005	1300	1094	873	642	743	851	563	127	259	223	642	693	587	1138	698	1516	1583	2489	1800
PCHAS_0506700	1236	1699	1337	1172	1079	1503	1528	2381	2736	1105	1176	3092	297	100	1082	1047	1192	729	480	750	312	312	172	564	1054	1170	2231	1630	827	3976	3819	2342	5116	4235	6655	4923	6492	3335	190	272	376	309	369	234
PCHAS_0506800	424	528	705	596	380	216	197	210	260	127	78	283	154	17	249	499	404	174	367	406	1318	1462	1432	1459	1786	2275	1885	1677	1152	1906	1548	1208	434	555	794	778	938	582	633	359	1102	1627	1651	1535
PCHAS_0506900	422	329	676	574	297	105	49	116	197	35	55	360	296	15	266	518	341	125	315	340	889	2462	1652	1816	2313	1454	1252	1056	810	1231	520	561	376	368	484	760	1012	867	1217	764	1695	3645	1182	1853
PCHAS_0507000	90	91	66	44	31	19	14	19	29	18	14	132	23	8	72	125	120	73	49	47	91	121	94	134	117	192	147	83	60	98	146	71	141	119	212	688	482	262	39	60	92	107	143	65
PCHAS_0507100	404	377	651	597	376	200	157	200	285	110	79	162	37	3	94	174	186	64	247	287	468	724	563	1107	1788	1439	1508	1295	760	1764	821	885	475	609	684	501	798	336	63	59	97	556	345	511
PCHAS_0507200	830	1123	1282	1078	866	801	910	997	1171	889	387	908	106	19	362	326	392	166	491	770	1397	1139	760	1085	1845	3307	3551	2718	1819	3837	5357	2894	2253	1946	3577	2523	3313	1626	270	260	407	586	1414	839
PCHAS_0507300	25	9	31	25	21	14	13	31	43	13	20	390	34	4	54	24	13	8	17	12	126	56	73	62	68	111	156	86	77	168	805	128	1779	858	2306	5816	4361	2959	291	678	751	214	701	178
PCHAS_0507400	117	79	94	52	29	23	6	18	26	6	23	160	52	9	93	149	149	67	55	42	189	867	585	699	721	528	185	200	135	195	96	166	529	484	435	920	1218	690	153	197	305	809	375	162
PCHAS_0507500	441	512	883	718	422	178	130	116	135	80	34	84	46	5	121	305	223	66	431	424	709	772	850	1492	1639	1984	1598	1435	934	1612	839	880	155	198	341	293	401	158	57	29	171	670	562	720
PCHAS_0507600	229	270	390	311	211	118	120	118	165	90	46	98	29	6	56	116	95	54	176	201	452	304	216	436	697	1100	1103	864	589	1058	1015	701	233	227	401	270	388	176	43	30	67	135	309	210
PCHAS_0507700	172	182	308	216	162	128	145	146	205	87	38	104	19	6	25	52	28	18	60	122	252	162	105	256	428	804	986	730	449	1270	1208	787	256	341	440	246	388	164	21	35	43	90	181	128
PCHAS_0507800	8	6	9	9	4	8	17	14	12	3	5	27	2	0	2	2	6	0	2	7	26	25	30	35	73	118	196	129	90	285	389	207	193	161	272	217	348	105	28	22	27	24	53	26
PCHAS_0507900	88	87	72	56	59	97	110	163	194	71	80	267	23	5	73	77	99	42	24	32	41	112	66	87	84	86	186	118	52	302	551	249	366	242	622	396	538	260	32	28	44	57	56	34
PCHAS_0508000	38	24	17	6	11	1	1	3	4	3	7	49	22	3	28	53	81	47	23	9	21	47	33	50	51	57	16	23	16	30	4	17	89	53	120	152	163	83	7	10	14	41	38	13
PCHAS_0508100	1	3	1	5	4	2	3	6	0	1	0	3	1	0	0	3	2	0	2	1	2	6	4	3	6	6	6	3	10	14	13	7	4	6	2	6	5	8	5	1	7	9	10	4
PCHAS_0508200	8831	11498	13153	12767	8829	5825	4751	8506	10977	2772	3725	14924	7599	243	8616	11292	9349	4147	7325	8688	12816	25598	20806	23820	31074	21892	21507	20178	13514	26755	18925	12418	21074	19271	27911	33465	34582	26572	12614	9588	19036	43024	18119	26582
PCHAS_0508300	80	65	108	80	57	52	53	76	104	26	33	171	12	1	35	44	30	13	36	57	271	223	219	285	335	693	631	480	315	792	1152	587	691	456	928	975	1127	430	68	88	153	159	280	245
PCHAS_0508400	66	91	67	76	48	34	32	37	53	5	21	65	21	8	44	92	74	43	55	64	78	176	70	161	268	150	159	133	89	159	115	89	115	103	152	116	181	138	27	39	52	80	59	81
PCHAS_0508500	255	247	448	353	224	128	100	144	243	104	71	184	31	8	96	194	155	74	194	200	504	473	351	503	727	1254	1183	944	668	1122	1257	766	407	332	696	401	544	272	46	25	73	212	364	365
PCHAS_0508600	227	170	440	335	277	199	89	202	427	82	126	386	25	4	53	82	54	17	98	149	516	406	269	476	802	1461	1841	1261	784	2206	2883	1552	1162	917	1713	1133	1593	727	91	80	138	164	473	298
PCHAS_0508700	144	137	183	153	92	53	60	65	130	40	36	120	32	11	46	80	111	41	79	96	189	334	182	309	428	579	512	421	284	568	502	348	368	278	461	334	441	211	27	27	54	127	136	139
PCHAS_0508800	113	131	197	194	127	80	89	96	150	63	42	100	14	2	29	46	52	16	80	95	307	224	196	310	428	698	907	647	398	902	910	682	252	260	427	218	339	132	23	16	48	119	219	207
PCHAS_0508900	283	301	475	437	226	145	136	108	198	82	40	130	27	2	79	201	147	43	230	285	851	665	550	753	1024	1559	1410	1182	862	1332	1222	885	272	315	378	268	385	200	65	48	136	371	666	638
PCHAS_0509000	660	839	1057	898	650	450	424	468	549	287	131	297	36	13	153	226	237	90	409	579	698	668	533	1039	1417	2162	2453	1748	1144	2859	1937	1520	663	649	1144	711	1048	459	50	58	126	361	505	504
PCHAS_0509100	9536	11682	20730	15601	9108	4870	4370	5270	6179	2927	1973	7348	8472	291	7989	15522	13072	4791	13493	10837	63271	49000	48504	52293	60886	77621	55267	53509	37057	45642	44505	30209	13590	16239	20878	23067	29189	19587	19927	11640	43794	64382	82446	68707
PCHAS_0509200	803	1114	1557	1326	894	372	334	338	337	216	85	176	51	9	188	442	365	109	625	810	1670	1823	1551	2502	3454	4205	4172	3366	2210	3835	2275	2038	366	574	732	579	937	394	224	117	512	1337	1435	1477
PCHAS_0509300	1223	1812	1946	1808	1203	747	799	680	958	542	373	1517	1139	43	1456	1861	1581	738	1295	1343	5324	8080	5273	4520	6501	5949	5687	4915	3708	5156	4526	3038	2096	2664	2819	4910	5532	4819	5472	4630	8460	9726	7489	7714
PCHAS_0509400	421	539	573	547	405	328	308	406	517	195	186	548	91	7	211	254	248	112	254	420	606	755	571	874	1272	1722	1764	1359	879	2169	2167	1160	1660	1383	2439	2209	2431	1235	184	205	389	607	608	588
PCHAS_0509500	166	176	373	240	165	87	82	83	93	55	28	62	10	2	39	67	60	15	96	145	374	251	229	530	754	1160	1107	868	640	1079	868	629	182	174	341	258	406	166	35	42	80	127	268	235
PCHAS_0509600	583	499	1167	933	513	319	207	325	603	127	163	594	145	5	168	363	231	86	407	481	1820	2929	2484	3544	4532	4770	4587	3803	2575	5570	3817	2896	2219	2161	3260	2189	3443	1484	259	189	473	2278	1663	2478
PCHAS_0509700	6	5	0	3	0	3	3	9	13	5	10	299	22	4	66	13	18	15	3	4	56	20	46	21	12	12	5	14	7	10	233	11	913	339	1233	3456	2542	1665	180	325	413	126	369	89
PCHAS_0509800	79	74	108	60	45	25	16	18	32	5	11	82	19	5	40	71	104	36	42	45	128	278	190	363	441	338	242	257	173	284	132	165	187	183	226	307	382	215	48	63	80	239	156	108
PCHAS_0509900	309	253	600	445	295	132	76	122	156	66	41	88	33	4	49	131	108	28	197	251	568	510	474	915	975	1636	1524	1216	763	1613	958	974	205	178	438	216	322	158	23	13	80	343	423	486
PCHAS_0510000	417	376	863	625	393	159	133	127	238	69	45	112	32	4	64	166	130	34	250	318	1186	1346	925	1624	2258	3019	2986	2504	1661	3118	1930	1724	434	469	857	450	776	309	77	59	179	708	829	966
PCHAS_0510100	311	331	409	372	296	272	275	335	449	228	136	495	61	9	168	202	208	105	159	223	492	424	254	396	666	1230	1450	1124	689	1805	2882	1225	1198	953	2039	1599	1666	905	148	167	209	227	641	309
PCHAS_0510200	52	38	14	16	12	14	22	55	42	14	41	710	61	9	235	95	84	52	18	20	78	50	53	65	37	39	47	31	25	55	358	50	1933	735	1859	4427	3435	1818	141	260	357	186	200	111
PCHAS_0510300	427	502	710	665	386	198	144	103	140	115	27	108	78	8	175	333	326	108	337	432	2063	2391	1511	1887	2759	3071	2886	2263	1793	1993	1442	1347	195	384	358	277	459	314	482	407	798	1635	1855	2065
PCHAS_0510400	271	391	420	284	220	113	89	58	100	50	43	205	100	31	212	578	500	275	217	197	628	583	412	577	873	1210	1205	943	676	1036	765	679	90	144	199	220	243	136	150	103	240	397	698	495
PCHAS_0510500	303	298	697	542	294	100	85	48	86	67	22	86	50	6	110	283	236	76	321	304	1479	1162	984	1435	1888	2420	1934	1727	1349	1446	913	957	107	179	199	235	289	165	156	92	291	877	1249	974
PCHAS_0510600	27	20	27	21	14	9	4	2	7	1	3	14	6	2	8	26	13	10	11	15	29	72	61	97	86	94	67	75	53	73	26	44	13	20	33	64	60	38	4	6	13	63	62	49
PCHAS_0510700	14	14	5	7	2	1	1	1	2	0	4	18	3	2	16	15	24	9	14	7	33	69	40	57	29	70	21	15	19	10	2	17	15	8	44	34	47	23	3	2	7	21	55	20
PCHAS_0510800	4	6	3	0	2	2	1	1	0	1	0	4	0	0	4	8	5	4	3	1	2	5	5	1	1	3	3	3	0	2	5	1	2	4	5	17	17	4	1	0	0	3	6	1
PCHAS_0510900	44	45	25	46	19	21	15	39	21	9	41	2075	340	36	701	174	174	112	34	42	195	149	152	100	98	72	55	59	43	52	81	25	735	175	636	15748	8626	8259	995	1350	1830	519	712	318
PCHAS_0511000	7755	10238	13495	11309	7431	4472	4898	4864	5970	3788	1783	4804	3755	153	5723	8395	8125	3137	8085	8497	23244	33179	24048	20385	25840	34099	27592	23847	17268	23743	21118	16826	6881	7750	11947	8856	13093	8284	10811	7214	17274	31680	28820	29630
PCHAS_0511100	3	5	6	4	2	3	3	1	1	0	1	2	1	1	2	3	4	1	7	5	31	24	31	15	11	13	23	13	6	15	16	13	1	4	6	11	25	14	33	9	43	35	45	25
PCHAS_0511200	12	6	22	9	4	5	1	12	8	1	2	14	7	1	2	3	1	4	6	7	13	17	7	14	19	21	11	16	11	29	34	21	27	20	26	47	75	36	13	8	25	28	16	14
PCHAS_0511300	617	766	1035	991	566	238	185	158	250	158	87	1056	758	24	852	942	854	388	630	714	1972	4744	2717	2456	3624	2614	2316	1905	1501	1970	933	1099	382	634	577	3784	3267	4115	4041	3554	5427	6660	3292	3816
PCHAS_0511400	310	345	519	472	273	151	93	96	149	70	30	104	37	1	99	176	151	48	260	285	789	719	564	833	1046	1571	1619	1134	877	1307	948	757	151	201	286	366	412	280	252	199	414	522	733	736
PCHAS_0511500	1169	1587	2006	1819	1042	690	597	1069	1016	483	518	5217	2011	114	3050	2537	2238	1128	1615	1332	5212	9037	6084	5247	5675	4848	4490	3562	3148	3709	4055	2557	8684	4415	13868	33102	23131	19251	6304	5869	13425	14019	8387	9783
PCHAS_0511600	634	841	1104	1028	667	460	550	595	674	424	230	565	160	15	304	520	458	202	586	642	2138	2370	1593	1554	2258	3615	3356	2558	1792	3099	3996	2138	1245	1168	2105	1306	1865	924	624	313	720	1749	2500	1891
PCHAS_0511700	131	120	229	186	106	77	69	76	97	56	34	71	27	4	54	111	87	33	87	108	346	259	280	256	341	628	481	410	300	490	511	402	120	127	210	159	225	99	53	35	114	253	391	311
PCHAS_0511800	222	292	323	247	168	117	91	123	149	69	53	205	71	10	141	347	258	153	164	162	719	589	509	460	681	1044	947	734	562	906	1010	677	305	358	466	333	508	244	143	111	224	453	735	588
PCHAS_0511900	72	48	45	45	42	108	125	250	284	162	157	787	37	8	192	69	142	59	21	27	104	127	89	105	60	101	105	75	50	250	1620	264	1848	1073	2299	2629	2273	1210	200	321	356	118	453	149
PCHAS_0512000	10721	13542	18715	15811	10446	6501	6888	7207	8472	5695	2522	6974	4712	198	7392	10720	10415	3831	11498	11490	34690	50092	35889	30445	39919	52287	41563	37298	26734	36874	34671	24726	11770	12105	20501	14290	20599	12558	15084	10199	24857	46150	43700	43785
PCHAS_0512100	226	411	191	88	44	54	20	33	62	37	50	344	196	72	450	1045	924	534	227	77	79	116	104	115	114	244	155	113	107	101	105	84	71	69	189	207	120	85	61	50	91	78	156	95
PCHAS_0512200	271	281	471	420	184	72	57	56	71	57	28	106	133	3	209	442	333	127	338	282	1069	1453	1198	1053	1169	1289	1023	923	676	710	579	508	112	163	162	158	206	117	321	180	556	1305	1386	1469
PCHAS_0512300	209	238	286	267	181	132	110	161	207	97	57	175	56	5	102	142	120	53	140	144	751	696	605	752	905	1336	1245	1024	718	1178	1333	786	566	520	926	911	1066	508	255	289	503	573	978	765
PCHAS_0512400	208	217	280	252	185	186	182	276	405	196	127	558	126	11	207	198	200	64	142	165	1104	1079	878	637	808	1420	1366	1010	743	1331	2880	1123	1751	1421	2492	1939	2298	1160	672	555	1063	1088	1935	1218
PCHAS_0512500	364	313	669	569	298	129	60	67	125	42	49	546	445	8	357	518	340	170	341	355	1129	2535	1888	1696	1909	1537	1315	1160	924	1191	470	697	168	226	312	1164	1256	1615	1456	1180	2511	3484	1668	2388
PCHAS_0512600	314	411	633	599	290	125	104	48	98	75	43	431	444	9	458	645	595	256	405	391	1703	2728	1886	1324	1560	1912	1419	1259	990	959	647	612	99	161	162	1120	1233	1322	2397	1555	2942	3331	3265	2625
PCHAS_0512700	371	359	649	545	339	228	143	222	436	76	130	627	173	8	201	353	253	104	257	288	836	1747	1289	1375	1789	1390	1605	1200	806	1832	1116	956	1169	860	1501	1635	1847	1022	603	381	946	1954	957	1358
PCHAS_0512800	656	901	1246	1000	668	480	517	528	610	431	200	640	64	14	237	407	352	158	536	656	1727	961	851	1365	1983	3559	3171	2616	1881	2951	3770	2084	1038	867	1717	1884	2017	975	202	173	393	524	1364	910
PCHAS_0512900	251	282	147	151	136	120	129	99	175	120	101	1730	319	53	835	374	484	320	111	132	671	703	596	415	395	744	561	483	281	621	692	519	1344	713	1532	18192	12256	12756	2562	4436	4898	1166	3084	932
PCHAS_0513000	610	824	928	845	603	573	573	723	945	534	316	857	69	10	269	318	254	94	392	593	1039	854	586	819	1164	2272	2338	1816	1145	2492	3885	1972	1857	1365	2832	2145	2525	1189	206	182	331	495	1033	608
PCHAS_0513100	37	46	39	20	17	11	4	12	8	8	14	201	45	16	87	107	97	42	23	16	52	23	28	50	54	76	56	52	46	37	124	34	271	109	431	1264	682	455	60	108	130	51	201	59
PCHAS_0513200	156	172	348	297	126	56	24	11	29	29	12	62	28	3	55	178	127	41	177	173	737	712	709	997	1200	1403	1069	904	743	666	446	427	62	119	125	159	160	91	90	44	220	579	627	736
PCHAS_0513300	125	115	256	205	108	42	39	24	61	23	10	108	96	0	94	171	136	48	117	121	972	1082	1038	847	1138	1469	1304	1098	858	958	657	606	111	163	198	355	422	301	512	344	866	1191	1459	1408
PCHAS_0513400	125	163	301	218	123	63	26	32	47	13	8	35	41	2	51	164	113	40	149	157	267	314	358	455	530	550	516	386	323	435	194	233	33	49	75	83	91	51	72	32	156	412	303	414
PCHAS_0513500	265	294	602	454	252	129	104	92	112	48	43	291	258	4	265	523	376	143	384	333	3430	2266	2817	2005	2000	3233	2338	2070	1652	1618	1633	1088	477	451	780	1670	1483	1036	1703	1272	3808	3138	5328	4010
PCHAS_0513600	1	8	37	21	10	3	4	0	1	1	2	2	5	1	3	6	4	4	10	8	150	143	114	112	157	298	186	167	113	101	75	72	9	12	25	57	52	37	31	21	44	94	218	108
PCHAS_0513700	8513	12387	27009	19060	8757	3216	1665	696	865	1373	536	2904	4021	241	5945	16534	13455	4539	14130	14545	63946	52772	41460	48767	63282	91799	57254	51917	39648	29214	25229	20293	1558	2785	2996	4607	5538	3752	8574	3902	16560	39554	68364	52847
PCHAS_0513800	2	3	2	0	0	0	0	1	2	1	0	1	0	1	3	4	1	2	0	0	9	10	10	8	13	19	11	12	10	3	5	3	0	3	2	9	5	2	5	5	7	7	14	19
PCHAS_0513900	472	536	750	673	437	278	282	314	419	156	108	323	30	5	119	169	166	61	330	455	574	520	494	821	1160	1715	1835	1436	863	2077	1393	1359	522	529	962	641	932	449	84	86	156	306	358	395
PCHAS_0514000	520	332	183	207	185	1411	875	3398	2850	857	2126	9139	329	53	1159	594	589	248	136	209	743	759	514	524	601	492	497	400	261	1368	12751	1652	39381	34764	36332	29601	38377	22078	1119	2379	2265	1500	1799	906
PCHAS_0514100	292	397	448	389	318	218	280	258	339	231	115	286	147	12	236	305	278	121	260	310	885	1042	764	635	781	1219	1119	892	652	1156	1298	851	443	472	681	554	725	438	748	389	839	1019	1365	982
PCHAS_0514200	916	1194	1326	1308	890	705	750	998	1257	461	479	1282	353	22	573	852	710	287	637	832	1652	2176	1918	2205	2814	2943	3325	2613	1633	4031	3806	2243	3015	2657	4167	4122	5135	2395	966	713	1743	2843	2190	2367
PCHAS_0514300	10	6	4	6	4	5	5	15	9	8	10	324	28	3	113	23	44	17	9	10	53	70	43	29	42	28	28	25	19	19	173	16	550	223	734	2792	1718	1204	115	231	265	138	405	116
PCHAS_0514400	425	452	529	360	300	244	178	424	342	117	158	692	282	28	292	590	500	227	266	267	1920	4323	2863	2757	4641	3606	3043	2609	1851	3367	3007	1823	3394	3617	3410	4792	5300	4375	3289	2687	5740	6212	2893	3413
PCHAS_0514500	7	8	3	3	3	4	1	2	8	1	4	3	3	0	7	4	8	5	6	3	16	36	14	16	18	28	26	24	15	22	39	21	6	10	17	23	26	20	16	9	23	31	46	32
PCHAS_0514600	564	533	914	704	571	416	350	525	794	164	211	537	92	13	178	247	215	61	293	429	1673	1883	1563	2174	3194	4600	5180	4080	2635	6438	5558	3968	3118	2908	3929	2819	4537	1714	258	254	483	1261	1437	1431
PCHAS_0514700	429	486	777	706	440	222	187	172	300	125	74	177	66	3	156	340	260	106	386	405	1042	1161	1037	1296	1653	1938	2015	1567	1110	1826	1119	1096	278	385	520	422	640	269	169	130	359	966	1079	1172
PCHAS_0514800	105	74	169	145	77	35	22	29	43	11	17	33	24	0	37	76	62	28	74	77	240	333	344	388	398	411	417	322	217	380	199	230	71	58	107	118	161	50	41	22	106	348	286	300
PCHAS_0514900	79	96	145	151	71	46	38	52	58	28	34	194	29	2	70	97	75	16	93	66	234	425	344	355	374	347	402	294	247	346	331	206	367	169	450	841	597	268	93	46	156	344	313	303
PCHAS_0515000	3048	7967	2544	601	780	807	295	526	919	573	719	5250	3036	1426	7231	16936	17872	11737	3200	808	560	698	676	1166	322	2266	456	254	277	681	270	682	431	316	2500	3750	1062	501	211	202	191	292	973	220
PCHAS_0515100	3760	7985	2354	777	686	784	318	525	885	551	819	5420	3037	1499	7585	16384	17731	11467	3216	1052	918	1709	1178	1509	549	2558	631	388	394	753	395	784	823	746	2856	3839	2046	1146	425	524	557	782	1936	414
PCHAS_0515200	213	148	396	307	181	91	67	86	156	47	41	111	24	5	42	114	72	20	132	146	745	537	535	702	828	1657	1507	1089	740	1546	1528	997	306	317	630	364	553	218	42	26	145	331	659	626
PCHAS_0515300	40	44	29	30	27	19	16	33	45	26	26	338	32	4	120	55	84	72	28	24	32	39	33	27	26	53	60	40	34	86	180	54	264	139	496	1474	736	479	51	70	94	53	147	43
PCHAS_0515400	250	272	367	306	214	279	204	539	666	138	289	1217	72	7	194	119	125	43	62	153	122	102	55	139	306	309	550	346	253	872	1128	538	1888	1265	2555	2445	2639	1300	90	132	205	111	160	100
PCHAS_0515500	318	396	453	431	313	342	312	493	606	218	220	787	112	10	200	271	267	119	209	260	909	947	957	1119	1342	1713	1691	1365	925	2360	3563	1376	2279	1858	3502	2793	3591	1699	385	309	950	1319	1220	1201
PCHAS_0515600	150	211	218	215	139	115	145	143	180	112	55	267	86	5	161	152	150	78	125	140	645	721	618	415	484	928	842	599	448	874	1319	663	462	388	891	1285	1063	793	586	463	809	795	1367	874
PCHAS_0515700	92	77	108	84	80	120	122	218	281	87	132	374	17	8	78	16	34	11	19	52	46	42	30	51	70	169	381	241	120	654	989	431	926	606	1310	891	1131	553	40	54	90	51	106	49
PCHAS_0515800	4	1	2	1	1	1	5	4	9	4	3	6	1	0	2	1	2	3	0	1	2	3	2	0	7	3	12	4	1	12	44	12	34	25	27	18	18	13	4	4	1	1	7	3
PCHAS_0515900	317	325	569	482	299	165	132	174	199	87	81	221	34	3	71	199	132	50	216	252	656	746	570	848	1178	1268	1441	1150	726	1332	1044	795	431	476	637	582	833	358	122	96	208	510	546	597
PCHAS_0516000	991	1075	1322	1310	841	807	615	1625	2062	382	955	3636	680	31	885	1136	841	355	664	926	1877	3213	3122	3647	4060	3742	2974	2648	1900	3824	5246	2079	10031	7976	11420	7555	9609	5390	1936	1433	3214	5356	2816	3559
PCHAS_0516100	54	64	41	37	23	15	16	9	17	11	10	58	26	15	96	173	168	88	37	33	80	79	63	70	63	100	87	73	40	91	74	59	28	35	51	59	48	32	21	19	27	61	100	66
PCHAS_0516200	168	168	291	261	156	60	47	41	58	33	23	61	21	3	46	139	91	26	111	149	744	629	712	839	1017	1578	1255	1073	797	941	730	541	94	140	179	132	195	85	101	43	181	459	836	735
PCHAS_0516300	361	397	512	414	346	609	609	925	995	513	437	1159	84	13	279	149	196	88	108	209	260	235	147	220	397	692	1157	928	417	1944	3585	1434	2194	1816	3246	2508	3350	1510	151	232	394	172	560	170
PCHAS_0516400	1542	2212	2685	2511	1730	1109	1258	975	1419	921	365	921	473	28	781	1324	1202	436	1237	1684	5040	4714	3823	3995	4631	9452	7977	6622	4415	7511	8390	5351	1550	1880	2943	1598	2334	1385	1367	810	2376	4161	6188	5031
PCHAS_0516500	49	31	84	47	32	12	12	9	23	5	7	46	29	1	21	43	39	13	29	42	806	907	817	603	657	1146	810	637	485	680	637	419	170	159	246	252	365	189	374	224	588	861	1295	847
PCHAS_0516600	673	815	1027	894	660	516	438	824	983	263	384	1148	221	21	460	579	512	194	485	592	925	1648	1333	1385	1402	1451	1744	1205	930	2118	1645	1174	2053	1243	2454	2426	3086	1424	569	375	1031	1827	1080	1313
PCHAS_0516700	438	446	900	772	398	181	84	109	173	76	42	129	70	3	109	342	205	79	373	411	1717	1777	1386	1428	2018	3016	2645	2183	1586	2097	1571	1318	232	333	443	363	475	252	136	61	351	1241	1739	1645
PCHAS_0516800	227	224	346	318	190	99	79	116	141	44	31	104	52	4	84	185	148	52	179	176	762	753	835	981	1147	1475	1332	1056	762	1241	973	724	265	310	438	294	508	199	176	77	359	812	802	878
PCHAS_0516900	469	602	765	696	478	289	240	238	310	191	81	135	27	9	96	173	156	59	276	445	927	855	685	1146	1655	2819	2740	2210	1374	2571	2318	1555	390	472	721	455	681	321	97	62	190	503	790	732
PCHAS_0517000	4754	5077	8258	7181	4068	2098	1447	2314	2927	927	974	5727	4107	122	3795	6730	4974	1925	4549	4494	15848	21789	22928	21916	24463	22313	18445	16238	11746	18381	13468	10139	6032	5817	9828	22116	21193	16180	14527	9169	28542	38385	22686	28013
PCHAS_0517100	1519	1974	2104	1986	1355	1330	1677	2065	2301	1421	947	3344	1825	80	2208	2181	2161	994	1385	1580	5761	5999	5283	3779	4578	6886	5345	5151	3492	5933	11674	4872	6970	6735	9511	12357	13437	10021	5754	4870	10796	7812	12470	7896
PCHAS_0517200	204	316	362	344	209	148	145	134	178	133	66	254	184	15	258	435	369	205	238	239	1201	1074	869	677	776	1162	1071	777	625	833	989	637	341	297	516	530	731	415	801	462	1154	1220	1909	1289
PCHAS_0517300	416	438	662	569	303	203	138	168	242	107	87	444	456	23	477	798	580	283	481	472	2984	3214	2725	1999	2078	2741	1982	1789	1341	1493	1526	1038	468	491	676	829	1034	909	1876	1083	2941	4324	4798	4201
PCHAS_0517400	500	561	832	823	475	266	187	262	393	121	117	429	241	9	294	466	372	152	430	440	720	1365	1096	1221	1462	1184	1355	973	698	1457	796	742	505	535	743	921	1285	741	664	449	992	1759	903	1203
PCHAS_0517500	1035	1204	1501	1465	990	679	573	1013	1179	357	366	1341	566	28	698	1073	814	368	670	992	1645	2684	2454	2535	2920	2969	3041	2392	1754	3700	2646	1909	2041	1750	2931	2909	3697	2289	1609	1065	2935	3807	2220	2826
PCHAS_0517600	1394	1626	2346	2134	1262	704	614	849	1147	461	435	2848	2416	65	1996	2775	2019	867	1547	1574	8007	9133	7945	5394	5621	7830	5503	4999	3937	4381	5462	3315	1831	1619	3017	6102	6546	5991	7667	5041	12247	12348	16110	11827
PCHAS_0517700	482	706	280	93	87	70	26	57	84	30	95	622	304	117	665	1592	1546	952	280	112	76	78	99	134	80	239	115	69	48	110	68	109	130	157	333	478	295	193	40	65	61	94	106	56
PCHAS_0517800	825	1215	1111	1246	952	906	1040	1027	1205	814	442	1083	99	12	355	352	408	136	390	759	1272	749	627	1070	1469	3645	4156	2924	1843	4939	7621	3321	2455	2418	4281	2512	3406	1679	212	324	489	493	1331	901
PCHAS_0517900	791	834	1375	1237	744	537	362	664	922	309	304	986	257	16	347	740	544	188	550	722	2670	2557	2668	2638	3076	4911	4416	3572	2501	4687	4998	2877	2252	1870	3607	2506	3264	1529	732	504	1468	2763	3327	3174
PCHAS_0518000	149	178	263	204	150	119	76	119	190	67	50	206	28	4	49	114	72	26	93	129	398	246	325	488	532	792	947	638	452	1023	1170	659	531	421	862	798	982	413	59	62	193	270	402	358
PCHAS_0518100	188	196	295	224	175	132	115	149	226	90	77	252	24	5	87	134	108	45	119	144	508	528	410	604	882	990	1272	901	668	1247	1452	831	776	857	1019	998	1271	644	155	157	295	415	515	503
PCHAS_0518200	14	14	9	10	6	3	1	7	8	0	7	9	1	1	1	18	19	5	4	11	14	39	22	24	38	33	28	21	19	23	21	14	16	16	13	23	18	24	8	3	11	22	17	19
PCHAS_0518300	338	391	549	528	299	209	208	182	273	186	57	116	34	3	65	144	145	63	232	250	452	274	200	549	964	1349	1331	1098	737	1241	1147	909	270	288	459	400	475	215	39	38	108	138	294	214
PCHAS_0518400	597	687	994	910	586	365	303	391	425	198	126	355	49	12	154	301	255	83	372	573	1100	1033	838	1779	2806	2843	3068	2448	1569	3000	2569	1692	1068	1111	1417	1357	1955	785	199	192	338	676	772	779
PCHAS_0518500	194	166	429	346	171	85	58	70	98	49	31	159	17	5	51	114	89	28	152	164	700	429	396	788	925	1325	1202	945	660	1127	1432	745	546	531	884	813	947	432	45	65	144	273	581	462
PCHAS_0518600	101	130	62	35	53	143	155	263	326	104	191	909	92	25	203	276	278	137	69	25	128	116	74	67	55	106	136	132	47	405	1557	298	1762	1251	2197	3016	2427	1415	161	274	301	149	428	100
PCHAS_0518700	344	389	633	581	346	155	110	86	157	80	39	81	21	4	71	221	168	56	240	317	878	595	472	724	1254	1750	1761	1471	958	1389	1153	958	159	234	284	175	287	105	58	57	143	388	589	552
PCHAS_0518800	3940	4282	6692	5838	3718	2164	1744	2158	3098	1239	975	3160	1930	81	2452	4118	3346	1277	3544	3777	10129	11623	11396	11754	14155	17624	14720	13082	9336	13788	12816	8478	5296	5770	8684	7010	8931	5155	4482	3537	9509	14882	13392	14451
PCHAS_0518900	304	346	495	520	274	104	83	58	106	44	29	183	174	8	252	408	332	129	255	313	889	1224	1181	1262	1133	1123	1080	880	604	949	532	427	121	156	222	306	428	276	574	381	1015	1695	1075	1437
PCHAS_0519000	4	1	1	0	0	1	0	0	0	0	4	5	1	1	1	4	1	5	0	0	4	6	6	2	1	2	1	1	3	0	21	0	30	17	56	80	57	31	10	10	12	8	2	3
PCHAS_0519100	308	317	64	132	120	294	267	801	553	448	708	15628	1193	127	4332	878	1195	588	128	272	1077	1177	674	381	403	153	168	142	146	146	2858	183	22931	12876	17827	54849	41263	39992	4389	8666	7533	4065	2540	1378
PCHAS_0519300	235	220	34	99	92	736	740	1599	1361	1089	1258	10563	747	130	2922	526	740	415	74	194	1198	701	644	264	247	234	188	178	188	262	12200	597	22054	14660	29369	55666	39119	27614	3441	5144	5681	2060	7281	1642
PCHAS_0519400	61	68	8	21	20	22	9	73	52	28	126	4250	691	71	1731	310	343	254	38	49	419	364	418	143	121	89	41	61	47	32	268	26	2272	789	2722	32605	17943	14286	1605	2625	2644	1285	2284	788
PCHAS_0519500	137	105	15	50	49	212	187	529	387	335	396	6842	466	84	1901	374	442	252	48	116	936	513	483	218	202	147	119	130	120	110	5154	167	19846	11300	21084	55096	41656	29501	2228	4152	4667	2271	4151	1288
PCHAS_0519600	517	425	113	147	235	2131	2055	4182	4404	2164	3181	11566	336	79	2232	425	721	286	97	245	539	431	259	231	226	191	297	238	150	1101	12530	1474	25008	23769	27091	21709	24713	16113	1107	1920	2296	999	1870	674
PCHAS_0519700	12	11	30	23	18	21	5	15	33	14	9	21	4	0	5	7	8	2	7	15	32	15	13	25	55	67	99	91	48	150	191	96	85	112	128	80	109	94	8	12	7	8	41	21
PCHAS_0519800	202	278	342	297	225	114	131	120	175	102	31	80	15	2	42	104	95	30	135	194	666	494	402	591	867	1432	1446	1154	756	1256	1163	884	256	262	396	278	396	189	60	37	99	270	443	450
PCHAS_0519900	301	393	581	506	403	217	205	204	302	175	69	111	32	3	90	111	138	29	204	314	527	443	318	524	838	1310	1481	1189	735	1477	1288	1011	259	370	455	426	535	251	58	61	135	239	417	315
PCHAS_0520000	544	712	704	645	546	665	751	987	1230	509	449	1074	60	14	264	165	218	69	236	451	768	343	388	798	1139	2293	2942	2277	1274	4391	7608	2852	3517	3240	5483	3365	4461	2082	224	299	466	339	920	523
PCHAS_0520100	3274	3501	5093	4727	3061	2217	1712	3572	4138	1004	1393	5014	2702	66	2762	3957	2985	1190	2738	2936	7037	8259	9088	9582	9938	10594	9907	8613	5828	12466	10791	6531	7931	7367	11346	12018	14563	9900	5946	4295	11492	15691	10427	12119
PCHAS_0520200	572	644	1131	959	576	345	269	297	418	191	121	211	46	7	116	301	247	82	482	561	1267	1068	794	1426	2167	2842	2814	2407	1665	2715	2158	1745	486	732	953	519	845	384	104	77	202	636	923	1021
PCHAS_0520300	65	61	72	80	41	38	24	21	69	12	24	83	27	7	39	132	91	48	27	38	282	335	251	274	224	311	210	171	149	283	542	243	124	165	192	340	418	251	314	232	450	362	550	405
PCHAS_0520400	2002	2760	2732	2636	1940	1872	2072	2630	2870	1629	1124	3502	843	65	1654	1779	1797	679	1317	1965	5323	6167	5288	4880	6539	9874	8760	7655	4606	9475	15734	6782	8487	7984	13375	10069	12554	7761	5736	3584	8983	8125	9651	7271
PCHAS_0520500	263	260	500	413	223	140	112	136	275	53	81	297	71	5	120	244	172	47	214	243	1264	959	1117	1487	1568	2144	1812	1508	1167	1653	1788	972	894	626	1212	1295	1443	599	185	172	435	859	1250	1294
PCHAS_0520600	250	268	372	280	198	236	168	372	414	126	222	1248	135	15	284	203	239	86	167	174	462	640	413	626	748	885	805	698	458	1090	1901	699	3685	2362	4786	7103	6117	3422	383	638	812	561	745	466
PCHAS_0520700	619	745	911	862	567	424	339	614	722	242	224	623	163	16	280	479	425	174	433	568	1027	1684	1397	1612	2139	1974	2060	1689	1080	2575	1909	1368	1459	1372	2227	1613	2170	959	314	237	560	1767	1099	1440
PCHAS_0520800	923	916	1696	1299	934	595	374	554	835	328	242	581	250	15	323	664	423	129	687	751	2413	2336	1946	1861	2057	3523	3630	2849	1879	3842	3503	2550	945	851	1635	1160	1730	844	802	521	1320	2120	2765	2341
PCHAS_0520900	62	51	76	51	26	16	20	9	22	13	16	66	26	4	45	72	60	29	32	34	536	627	477	416	595	910	929	677	557	826	759	566	291	300	350	419	654	224	272	200	335	521	731	389
PCHAS_0521000	125	150	206	170	134	90	78	90	148	49	44	207	34	2	55	66	57	27	88	98	619	417	353	361	516	711	1179	765	484	1193	1507	804	500	482	744	1160	1219	697	610	438	822	539	992	429
PCHAS_0521100	4177	4743	6799	6053	3920	3428	2853	4288	5372	2873	2236	9059	4061	116	4304	5575	4085	1756	4390	4117	19472	21966	15745	11148	13661	21101	16698	14117	10460	16357	28015	12801	16265	13298	23490	25547	28348	20183	16199	9804	20846	23737	34963	22453
PCHAS_0521200	531	523	956	748	494	232	177	238	442	113	97	241	55	5	116	276	243	77	336	430	841	1034	914	1662	1993	1873	2185	1807	1086	2430	1239	1214	614	639	851	784	1091	459	152	103	284	961	636	869
PCHAS_0521300	63	63	108	88	58	33	16	26	46	20	12	31	4	0	11	36	26	5	42	49	230	188	156	194	285	489	494	372	269	448	455	330	115	120	167	136	208	74	34	25	61	100	234	173
PCHAS_0521400	21	2	11	11	4	9	3	11	13	5	4	59	9	1	15	35	21	10	5	5	54	109	65	80	63	115	49	40	33	76	174	76	122	99	154	191	272	130	20	35	34	50	104	25
PCHAS_0521421	48	41	26	25	25	12	14	18	17	22	11	32	21	4	45	56	48	31	24	46	71	138	123	91	76	153	131	97	95	75	150	85	33	44	54	128	123	72	176	87	285	262	257	238
PCHAS_0521441	4	3	3	5	2	4	1	4	1	1	1	1	1	0	2	6	2	4	4	6	15	29	20	12	17	23	13	14	17	7	24	5	5	2	8	18	21	8	33	13	41	36	36	49
PCHAS_0521461	43	29	28	25	32	37	31	28	37	32	24	46	1	4	22	39	48	19	17	29	51	161	92	52	52	107	105	74	72	100	199	86	70	135	131	84	150	84	369	184	493	235	142	144
PCHAS_0521500	1456	1502	2440	2029	1374	768	368	1277	1439	193	551	2740	1504	40	1111	1876	1325	487	1128	1352	2807	4647	5000	5514	6386	4719	3848	3529	2704	4004	2915	2012	3521	2987	3918	7814	8349	5938	3294	2157	5234	10760	4363	5966
PCHAS_0521600	222	206	422	293	174	90	69	105	140	44	48	434	318	3	200	329	201	104	200	210	1176	2215	1877	1493	1649	1595	1268	1067	749	1215	723	643	522	523	805	1549	1927	1512	1766	1269	2801	3474	1959	2222
PCHAS_0521700	14	7	8	6	2	3	2	1	1	2	5	10	5	1	6	24	9	13	7	4	19	17	17	25	33	47	22	23	12	16	14	8	14	7	22	49	42	12	10	6	14	14	14	17
PCHAS_0521800	242	235	369	328	228	109	94	96	145	56	45	82	30	0	37	106	76	25	138	183	323	429	310	576	860	967	1056	837	544	1169	628	663	275	314	439	316	474	195	31	26	70	228	173	288
PCHAS_0521900	607	687	1154	922	547	265	142	239	279	82	153	2473	736	48	1183	1073	1042	424	879	666	2069	2448	2492	4265	4351	3072	2042	1960	1448	2056	1213	1065	2481	1104	2156	36603	22797	19817	3027	3062	4755	4516	3177	3207
PCHAS_0522000	93	71	234	173	89	34	15	21	39	6	14	41	8	0	11	37	27	7	71	80	254	178	166	361	573	720	888	636	370	739	427	437	75	89	116	121	182	78	20	16	47	132	158	187
PCHAS_0522100	106	108	236	173	96	44	34	40	61	29	29	135	8	3	41	90	65	36	96	93	260	351	256	437	755	767	738	657	439	712	536	375	213	256	387	565	684	301	58	56	105	172	229	197
PCHAS_0522200	55	66	50	50	52	94	47	184	236	56	107	595	19	1	73	46	44	18	17	36	134	131	87	112	124	226	377	240	127	638	1919	499	2794	1391	3506	4039	3917	1686	124	175	285	160	355	118
PCHAS_0522300	60	26	17	23	17	4	3	4	8	3	11	41	18	4	37	56	88	33	15	13	27	89	65	95	102	77	27	23	25	28	15	26	62	53	87	159	232	105	23	24	32	78	47	16
PCHAS_0522400	24	11	9	9	2	5	0	0	8	2	5	46	31	4	14	75	39	13	14	6	17	15	12	24	3	27	8	3	3	6	5	9	10	8	42	34	13	9	4	7	10	5	16	5
PCHAS_0522500	142	122	79	35	22	20	2	8	29	6	34	242	107	17	132	456	268	139	79	30	11	28	32	27	16	75	30	16	5	26	25	23	58	28	126	167	103	58	20	37	24	33	52	16
PCHAS_0522600	64	74	46	47	53	32	31	30	65	31	15	52	24	7	38	71	69	35	35	34	73	90	60	76	85	164	228	183	92	291	307	246	95	121	176	99	145	75	18	21	26	58	90	67
PCHAS_0522700	376	363	616	510	349	231	177	230	410	127	106	341	157	6	190	412	227	92	279	320	1352	1687	1329	1245	1533	2268	2146	1748	1227	2167	2368	1501	855	895	1284	924	1244	705	321	279	680	1601	1809	1685
PCHAS_0522800	2392	2517	3539	3147	2163	1603	944	2531	2879	439	1019	3327	548	47	1051	2234	1740	554	1786	1992	4457	8398	6335	8948	12446	7598	8064	7234	4608	10664	8248	4750	10139	10140	11526	12011	14618	7641	1688	1938	3230	9760	4122	6013
PCHAS_0522900	6433	8451	5669	5509	7037	9455	12048	14793	16338	9780	5698	13228	1668	303	4476	2424	3841	1664	1726	3681	4279	8262	4676	4820	6384	12923	21584	15447	6590	38764	60248	26710	33100	29984	51592	36130	49274	24568	2712	3028	5650	4822	12684	3047
PCHAS_0523000	4949	6504	9116	7534	5051	3228	3563	3419	4297	2978	1230	3648	2546	111	3892	5459	5389	2151	5555	5472	28434	33017	22679	17345	22176	33486	26494	21676	16727	23354	26716	16114	7278	6538	11777	9613	13277	8634	15636	7362	18773	29723	36587	28508
PCHAS_0523100	968	885	1466	1264	869	523	354	895	1190	203	367	1262	323	26	417	713	532	175	575	797	1516	2875	2565	3974	5096	3913	3361	3202	2077	4304	3350	2112	4640	4339	5077	5298	6581	3199	810	598	1619	3907	1629	2546
PCHAS_0523200	206	286	358	281	225	195	231	249	349	155	102	268	49	5	128	107	130	57	144	191	514	599	409	487	667	1046	1283	949	582	1535	1603	949	894	732	1203	968	1413	589	205	160	268	505	710	512
PCHAS_0523300	857	952	1468	1194	799	519	404	588	872	271	224	954	463	15	479	888	622	237	633	800	2188	2998	2601	2473	3176	3952	3710	3291	2047	3966	3388	2405	1614	1409	2634	1794	2353	1530	1228	734	1930	3416	2807	3202
PCHAS_0523400	139	140	166	149	118	163	139	181	264	107	98	353	20	3	69	53	51	10	49	81	190	127	97	153	335	507	856	611	337	1072	2246	805	1447	1268	1873	1976	2111	1163	217	253	336	126	363	142
PCHAS_0523500	525	606	903	791	536	311	409	361	446	290	111	245	44	12	167	254	278	79	417	463	1281	1193	779	1096	1662	2528	2416	1837	1251	2285	2282	1477	563	545	851	564	927	352	99	95	147	521	998	808
PCHAS_0523600	239	359	352	315	302	321	314	505	530	182	208	750	58	11	184	125	103	56	77	179	424	333	310	281	475	821	1438	1001	609	2169	2367	1305	1644	1088	2288	2303	2635	1405	172	220	438	311	643	399
PCHAS_0523700	184	160	299	249	175	152	98	109	195	79	52	213	70	4	90	163	118	42	123	137	812	607	581	563	660	1162	1289	955	684	1386	1580	949	622	492	940	889	1035	537	238	174	427	640	1177	914
PCHAS_0523800	172	153	273	244	179	85	83	97	198	67	47	119	34	3	35	97	53	27	73	136	448	394	290	278	446	770	875	700	414	852	720	583	360	301	445	493	523	308	86	65	146	297	447	366
PCHAS_0523900	112	127	68	69	45	54	52	108	93	61	111	2600	252	41	844	308	329	185	56	83	180	178	154	102	91	77	96	81	58	123	367	68	3407	1399	3760	15170	9509	6469	524	1327	981	586	763	253
PCHAS_0524000	16	14	10	10	7	3	10	24	6	20	13	479	45	5	154	33	35	15	11	8	57	50	34	24	14	27	35	18	25	19	239	22	855	334	1191	4343	2367	1701	177	311	292	125	516	104
PCHAS_0524100	954	1541	518	195	135	239	111	306	302	216	324	3258	830	306	1948	3472	3320	2118	686	230	559	371	424	374	183	567	267	144	142	276	2750	282	8278	4624	10077	24894	17568	13235	1419	2503	2918	1033	3085	734
PCHAS_0524200	504	646	835	756	494	306	313	434	571	192	176	456	175	9	276	457	455	171	392	446	1796	2267	2007	2203	2706	3202	2868	2466	1804	3148	2938	1689	1604	1481	2160	2258	2663	1181	605	497	1108	2398	2058	2199
PCHAS_0524300	21	27	39	34	17	20	10	13	26	7	5	40	22	2	9	35	22	10	8	18	108	96	80	81	87	168	190	141	97	199	183	121	49	61	73	267	217	154	83	61	137	116	177	137
PCHAS_0524400	9429	14223	18500	16043	10171	6413	6849	5670	6253	5446	1931	10708	8801	322	10081	13532	12825	5595	11628	11805	59398	43663	38268	30107	35507	64917	50559	40920	31749	39840	44044	31094	8068	10353	14804	37876	35332	28556	23352	16359	40547	46088	83785	53049
PCHAS_0524500	17885	26410	7033	10832	21710	42547	56035	67810	81281	39623	28282	51472	3196	579	12834	3147	6196	1842	1949	7501	5669	5115	2974	3153	4288	10022	66244	37606	9118	164149	330222	122215	179598	201290	261630	119856	194019	100625	6946	10626	12949	7370	18444	7089
PCHAS_0524600	1837	2654	2347	2426	2270	1778	2215	2282	3095	1458	721	2560	721	39	1235	978	1001	400	953	1637	603	659	484	677	1185	1705	2068	1592	845	2788	3342	1940	1416	1604	2141	2671	2488	1862	363	380	511	598	988	704
PCHAS_0524700	19	21	7	6	8	9	13	23	17	8	20	720	81	12	241	49	58	32	3	10	69	44	56	22	20	24	15	15	6	32	74	25	418	145	544	4605	2554	1763	143	284	293	149	319	94
PCHAS_0524800	631	679	1019	938	660	474	457	664	947	302	305	1264	519	13	436	616	493	206	410	588	3817	3480	3137	2745	3074	5263	4638	3746	2516	5051	7819	3444	2837	2452	4481	4242	4935	3492	2559	1827	4071	4115	6443	4823
PCHAS_0524900	1549	1763	2247	2433	1322	906	637	1027	1414	381	543	3519	2268	55	1960	2564	1797	952	1419	1540	4007	6171	5604	5118	5116	3976	4065	3085	2514	4084	3329	2148	2367	2170	3412	9413	8707	7601	5378	3822	8699	11260	6315	7865
PCHAS_0525000	31131	46269	70393	56242	36071	21139	23975	19693	25086	18197	7219	13726	8945	752	15375	28246	27935	9816	34482	38735	150235	110394	88478	95081	139683	250334	192374	172314	114937	167377	185746	118071	44259	50998	76777	50096	66795	35010	13682	8632	26585	78638	152583	113871
PCHAS_0525100	177	132	331	214	105	52	33	38	36	32	23	325	357	6	292	363	289	156	207	147	29555	25279	20172	13491	14914	16994	11550	10937	8794	5884	6452	4922	1727	2053	2430	28284	22444	21980	19135	12167	24624	30892	51580	32306
PCHAS_0525200	38	42	79	84	29	17	7	26	30	1	10	129	12	1	30	68	29	10	19	29	73	110	111	138	149	102	150	102	84	116	82	59	48	59	89	761	493	411	62	99	103	203	102	147
PCHAS_0525300	5	3	3	9	0	2	1	0	2	1	1	21	2	0	3	8	4	5	2	5	0	2	0	0	0	0	0	0	0	0	1	0	0	0	1	1	1	0	0	0	0	0	2	0
PCHAS_0525400	523	516	266	315	406	2125	2070	3897	4318	2537	2354	6894	300	44	1317	271	476	138	133	245	747	465	329	375	467	758	1055	765	461	2316	21191	2875	25200	22891	31400	16603	21766	12082	593	1073	953	577	2473	785
PCHAS_0525411	2	2	1	1	1	5	5	15	12	4	2	14	1	0	1	2	0	0	0	0	8	12	11	17	19	14	39	12	4	81	281	64	304	150	306	300	462	147	18	6	18	11	45	12
PCHAS_0525421	1	0	4	3	2	1	2	2	5	1	1	4	0	0	0	0	0	0	1	2	3	1	0	0	1	3	10	8	2	23	14	10	11	12	24	7	16	6	1	0	1	1	4	0
PCHAS_0525431	37	19	5	17	14	177	177	353	396	170	295	1163	23	6	189	35	54	15	6	23	0	0	0	0	0	1	0	0	0	0	12	3	18	19	23	31	13	6	0	0	0	0	1	1
PCHAS_0525441	53	42	57	34	16	50	39	82	169	44	77	379	27	4	33	72	39	24	21	20	1	0	0	0	0	0	1	0	1	2	7	0	4	2	4	1	3	3	0	0	0	0	0	1
PCHAS_0525451	164	235	147	241	81	73	45	61	84	38	65	690	534	14	579	1074	741	372	237	241	205	193	154	90	70	82	46	44	25	16	58	24	24	23	26	98	137	118	355	158	443	338	512	290
PCHAS_0600100	303	358	487	477	256	101	101	81	102	103	65	480	514	12	555	706	624	310	384	380	2000	2289	1808	1160	1250	1872	1016	1025	891	656	638	537	119	174	203	968	1127	1326	2708	1919	3797	2882	4284	2900
PCHAS_0600200	247	237	102	129	205	485	388	752	1028	328	200	513	38	4	96	56	49	19	30	91	3	3	2	0	0	3	6	1	1	19	23	7	17	24	37	14	16	8	1	1	0	0	2	2
PCHAS_0600300	188	110	24	35	84	747	558	1445	1629	667	571	1724	88	5	273	65	103	34	23	63	4	0	0	1	0	4	1	0	0	6	52	9	112	84	108	94	108	50	6	7	4	1	11	0
PCHAS_0600400	475	544	444	428	417	755	884	1243	1349	714	457	875	99	9	249	184	212	83	196	295	5	5	3	4	8	18	15	9	6	39	37	16	20	13	36	19	35	19	3	2	4	5	5	4
PCHAS_0600500	176	158	76	67	105	744	654	1449	1586	678	598	1812	91	5	323	96	111	53	34	70	0	8	5	0	1	2	3	3	2	6	61	5	57	54	92	28	65	30	3	3	3	2	4	5
PCHAS_0600600	334	221	79	77	161	1608	1663	3302	3445	1971	1342	3978	205	24	745	189	259	92	40	151	6	4	1	0	0	1	1	2	0	3	26	4	86	43	48	27	59	31	1	4	3	1	11	3
PCHAS_0600700	1137	1639	928	1139	1473	1273	1356	1524	1777	782	230	454	65	14	158	121	142	60	124	649	1	0	0	5	7	3	28	8	4	36	61	14	13	22	32	12	12	8	1	0	2	2	2	1
PCHAS_0600800	1672	2508	1265	1544	2198	2010	2229	2321	3116	1152	391	733	100	15	290	134	163	77	122	935	6	0	0	2	6	18	39	27	7	78	28	26	12	52	42	23	14	7	0	4	2	1	4	1
PCHAS_0600900	1286	1579	1244	1387	1442	1159	964	1376	1600	625	209	432	67	4	185	185	160	75	178	831	6	1	3	5	24	17	31	25	8	28	34	26	14	23	28	12	7	10	0	1	3	4	3	2
PCHAS_0601000	825	1165	785	835	1008	895	976	1115	1451	562	202	392	42	10	114	113	98	64	102	518	3	4	4	3	9	12	10	22	6	41	21	20	10	16	30	14	15	2	2	0	0	2	2	1
PCHAS_0601100	680	1017	568	709	956	784	724	947	1062	351	122	237	25	5	100	68	83	36	63	429	1	3	0	3	2	11	18	28	9	41	28	26	10	18	16	11	21	6	1	1	1	0	3	2
PCHAS_0601200	960	1175	933	968	1066	1046	1127	1403	1566	754	227	489	46	6	172	163	149	57	156	599	87	61	46	101	138	413	572	507	168	1004	767	487	295	494	584	225	473	186	14	11	38	68	85	84
PCHAS_0601300	105	94	22	41	52	518	454	1004	1039	404	376	1055	45	7	145	51	60	22	11	37	19	10	11	4	9	11	10	14	4	115	519	89	591	779	914	328	680	290	32	49	38	29	64	19
PCHAS_0601400	13	5	2	0	7	43	45	100	89	62	39	118	4	1	21	3	10	6	2	3	4	3	4	0	0	0	1	2	0	5	77	9	177	167	206	121	230	70	5	10	8	7	35	5
PCHAS_0601500	84	87	118	117	66	33	40	60	67	26	25	120	102	5	92	130	96	41	62	73	262	238	217	156	181	191	196	149	108	139	186	123	72	88	124	115	188	124	258	142	327	301	417	347
PCHAS_0601600	7	4	9	6	3	7	8	11	12	5	6	2	3	1	0	1	3	3	2	4	32	14	17	15	32	28	26	41	14	61	98	50	78	58	166	150	211	86	20	11	47	28	34	35
PCHAS_0601700	84	110	178	120	64	38	20	19	26	7	8	201	259	4	163	236	174	90	141	117	2698	3990	3140	2218	2292	2636	1892	1677	1338	1000	765	742	134	166	231	1250	1592	2050	3239	1675	4444	5503	5187	4793
PCHAS_0601800	321	449	275	332	132	83	57	54	81	65	72	1425	1240	54	1210	1359	1181	811	359	321	1760	2047	1745	976	918	929	613	582	548	337	371	295	187	178	304	3820	3143	3666	3916	2861	5619	4057	4690	3381
PCHAS_0601900	16	10	25	22	11	7	4	4	4	5	6	63	93	0	38	41	30	10	22	17	22	20	16	5	11	18	9	8	5	4	4	5	3	0	0	21	20	22	26	15	33	28	44	27
PCHAS_0602000	33	45	47	56	31	17	23	26	31	17	5	26	23	1	25	26	27	12	29	39	105	130	114	93	113	191	154	109	87	177	138	114	51	54	69	68	102	78	53	38	91	150	169	178
PCHAS_0602100	299	300	351	419	214	151	132	108	118	124	81	1138	1079	29	950	620	613	355	356	261	2331	2534	1857	1447	1555	1600	1021	986	776	706	997	697	317	432	521	5489	4440	4521	3445	2881	3909	3509	5995	3536
PCHAS_0602200	315	388	348	359	294	379	398	478	696	327	236	864	61	12	251	203	239	159	114	220	348	241	160	304	492	816	1259	919	548	1651	4415	1335	2275	2168	3198	3211	3460	1934	261	435	544	216	680	260
PCHAS_0602300	1117	1275	1400	1262	882	1026	1030	1180	1403	921	475	1647	717	38	1169	1262	1195	526	986	836	4071	3801	2948	2308	2850	3608	3571	2647	1885	3989	8251	3022	2702	3608	3853	5229	6615	4251	4050	2963	5580	4768	7019	4545
PCHAS_0602400	479	569	856	773	449	294	226	273	442	134	142	386	317	10	330	640	490	163	390	458	1103	1666	1541	1338	1441	1725	1578	1235	953	1539	1061	1019	474	468	781	565	842	486	739	456	1170	1918	1518	1805
PCHAS_0602500	176	82	63	28	12	12	5	4	14	1	27	233	94	15	90	245	245	101	45	31	130	288	398	306	263	460	317	162	133	303	195	184	897	513	954	1706	2288	1055	291	320	371	473	543	185
PCHAS_0602600	3	7	4	1	2	1	1	0	4	3	1	4	0	2	4	12	11	8	1	3	3	6	4	3	5	6	5	8	2	6	6	2	2	2	4	5	5	4	4	3	6	2	2	0
PCHAS_0602700	119	118	186	182	93	58	42	55	79	27	14	45	16	2	28	65	41	24	68	104	160	130	126	291	432	424	522	435	229	509	286	317	77	112	166	127	198	82	11	5	27	114	109	109
PCHAS_0602800	69	55	23	20	30	85	67	156	202	56	84	315	23	6	85	66	78	33	20	16	39	52	33	34	42	51	92	67	27	294	847	248	786	581	1201	780	874	460	29	47	82	43	105	44
PCHAS_0602900	330	331	510	470	245	179	141	103	198	79	53	133	31	4	109	253	213	69	240	282	907	906	840	1233	1478	1658	1621	1345	907	1452	1152	916	280	380	458	451	621	293	104	51	291	846	862	970
PCHAS_0603000	1114	1456	1656	1445	1083	977	994	1382	1564	863	592	1539	200	50	600	703	714	323	622	841	1181	729	494	1401	2277	4181	4709	3463	2100	5439	7600	3853	3883	3511	5732	4217	5653	2873	358	442	783	458	1263	618
PCHAS_0603100	51	30	33	31	20	6	5	17	22	7	19	61	12	7	40	53	73	35	30	23	88	186	138	229	307	202	173	133	106	195	224	117	236	241	266	444	621	291	47	74	68	196	109	60
PCHAS_0603200	679	915	1180	1039	713	431	493	385	502	383	126	236	44	10	140	298	290	82	505	696	980	705	518	943	1697	2530	2517	2169	1395	2549	2419	1703	432	533	807	488	728	347	94	68	129	317	656	565
PCHAS_0603300	263	363	421	447	281	192	148	216	241	83	61	227	34	4	117	184	151	60	202	241	382	533	439	800	1019	974	1068	810	523	1307	706	655	416	383	583	969	976	464	144	146	239	495	337	436
PCHAS_0603400	3472	4676	5115	4634	3483	2255	2224	3504	4045	1086	1205	2823	1225	84	2358	4118	3863	1567	3389	3523	4972	7859	5671	6928	9090	7147	7441	6518	4380	9502	5845	4607	5261	5492	7055	5463	7782	4032	1379	972	2767	8427	5407	6465
PCHAS_0603500	361	271	646	542	320	129	54	78	179	46	60	478	426	5	220	491	255	67	268	258	1731	2511	2121	1544	1621	2211	1959	1626	1213	1768	1273	1203	252	286	505	1217	1404	1374	1863	1128	2963	3116	2842	3054
PCHAS_0603600	207	278	377	362	258	145	135	94	199	114	42	118	25	7	69	131	108	44	138	214	460	336	252	319	451	858	1042	736	470	1064	1135	675	246	274	406	336	524	275	118	53	154	221	340	298
PCHAS_0603700	279	399	398	363	294	342	326	605	589	385	391	2403	137	18	594	139	232	84	96	239	565	295	298	441	765	1738	1917	1514	871	1939	8008	1599	9588	3915	14893	17421	13248	7793	644	927	1380	686	2655	587
PCHAS_0603800	242	201	285	241	154	276	204	527	600	182	368	1679	109	13	348	244	270	94	109	144	370	720	428	487	664	704	903	596	412	983	1831	683	3753	2672	3945	3956	4439	2422	297	496	590	575	555	525
PCHAS_0603900	369	509	731	648	408	220	211	187	217	123	65	185	85	10	201	354	322	119	315	368	540	898	642	774	922	1124	1247	975	610	1113	610	735	216	232	311	244	360	184	121	76	163	677	529	687
PCHAS_0604000	261	327	528	439	276	174	137	144	250	113	70	143	58	5	101	196	174	40	217	224	993	927	717	767	858	1738	1624	1198	915	1548	1522	1082	335	323	576	409	575	299	167	86	256	650	1172	857
PCHAS_0604100	362	413	503	445	359	271	313	465	665	193	244	685	45	7	143	156	130	64	135	266	368	450	279	638	1087	1340	1538	1289	701	2352	1991	1224	2256	1688	2937	2185	2962	1302	131	123	206	276	399	296
PCHAS_0604200	358	316	487	465	293	355	261	552	718	181	301	1160	55	10	162	145	107	35	122	212	443	206	187	664	941	1514	2202	1490	957	2943	5084	1979	3952	3528	5352	4098	5094	2500	261	542	645	274	542	354
PCHAS_0604300	149	135	244	208	100	58	44	56	98	46	25	393	418	5	326	383	297	134	178	131	1308	1372	1286	700	739	840	626	523	481	475	399	334	138	132	203	898	1038	995	1628	983	2456	2296	2711	2123
PCHAS_0604400	342	387	496	519	340	170	225	188	264	165	69	157	124	4	194	305	259	97	238	294	738	812	667	595	784	1276	1151	986	692	1066	837	820	282	320	418	313	457	290	345	239	478	796	942	886
PCHAS_0604500	5520	7488	10030	8722	5836	3591	3418	3425	4314	2281	1230	3313	2330	124	3472	5649	5051	1935	5322	6123	15614	19468	15678	16189	18994	26987	23324	19043	13126	21914	19414	13929	4674	5344	9120	6605	9319	5324	5286	2981	8973	18941	19679	19148
PCHAS_0604600	2316	3912	3826	3536	2527	1611	1833	1759	2195	1608	716	2322	1408	179	2323	3450	3682	1885	2313	2595	8035	7329	6056	5227	6619	11764	9517	8469	5817	9101	10928	6206	3245	2963	5506	4626	5202	3448	3421	2557	6342	7807	11415	8397
PCHAS_0604700	162	242	249	213	144	92	111	131	103	71	30	112	22	8	80	98	127	67	126	139	179	148	93	161	253	394	408	298	181	389	236	171	146	153	172	225	280	156	39	27	47	88	144	103
PCHAS_0604800	485	589	619	589	516	354	305	526	686	148	174	435	49	16	134	139	131	72	122	320	191	187	91	338	775	829	1485	1029	560	2336	1185	1069	928	1123	1293	1215	1856	971	102	108	179	174	186	127
PCHAS_0604900	57	64	114	74	56	39	24	49	80	25	21	57	5	2	10	11	14	7	12	28	66	40	41	78	224	404	682	495	245	837	1008	545	224	319	420	331	509	181	41	41	64	44	80	53
PCHAS_0605000	3777	4545	6607	5714	4141	2777	2779	3138	4012	2442	1261	2726	1292	79	2068	2904	2676	940	3479	3854	13290	15739	10968	9949	13610	22948	17655	14601	10682	15854	20387	12181	7734	6510	10841	6953	10502	5616	5503	2819	6630	12235	17379	14018
PCHAS_0605100	266	385	186	74	63	39	22	35	64	35	61	438	248	59	396	1080	819	484	188	64	68	85	74	107	78	208	90	80	53	99	112	78	86	111	280	335	185	108	35	46	57	65	121	54
PCHAS_0605200	92	123	189	145	102	97	66	91	131	45	35	81	10	2	24	44	36	10	46	86	191	156	120	299	457	729	785	541	361	1046	958	685	346	337	637	358	522	236	18	16	41	69	155	156
PCHAS_0605300	160	195	271	258	155	76	85	63	91	46	21	54	20	6	63	152	103	34	168	151	489	551	449	474	590	874	892	672	492	770	554	498	136	134	230	137	188	79	75	43	150	429	557	606
PCHAS_0605400	397	499	584	526	368	284	302	265	374	238	87	211	35	8	123	138	133	53	220	342	419	257	203	399	655	1200	1316	1039	688	1448	1399	1002	271	408	470	722	710	439	132	189	205	156	373	244
PCHAS_0605450	29	29	27	21	30	19	28	25	23	11	20	232	30	3	79	43	40	24	16	21	87	60	68	43	51	105	112	62	44	136	247	83	158	110	216	2297	1329	950	267	277	315	102	366	116
PCHAS_0605500	681	934	978	878	535	452	453	451	638	322	223	777	253	32	502	789	705	342	566	660	1655	1669	1322	1440	1791	2742	2499	2073	1506	2499	2886	1718	1317	1228	1914	1708	1973	1062	472	458	1063	1504	2025	1862
PCHAS_0605600	272	293	602	414	241	110	105	79	103	84	41	55	14	3	61	170	160	28	295	265	710	769	525	819	1272	1277	1320	1081	740	1027	712	678	122	212	222	201	279	118	52	43	102	435	471	469
PCHAS_0605700	26	17	43	29	20	22	12	30	40	11	24	330	17	1	66	29	21	8	12	18	93	58	60	50	72	95	97	94	54	90	497	80	801	391	1246	2360	1541	928	82	202	241	86	233	108
PCHAS_0605800	253	176	346	303	208	217	124	286	463	107	197	630	30	6	106	126	89	26	102	163	433	478	367	557	778	1177	1401	1094	609	1906	2666	1273	1855	1392	2766	1833	2413	1095	83	107	206	263	504	320
PCHAS_0605900	601	630	908	894	559	385	306	428	582	178	174	418	147	17	240	365	291	88	413	472	980	1140	1108	1546	1870	2251	2442	1825	1233	2860	2234	1493	908	1003	1592	1261	1720	849	340	249	702	1273	1080	1247
PCHAS_0606000	1515	1750	1995	1894	1263	1222	1192	2079	2196	820	963	4492	1005	74	1662	1342	1303	589	1044	1276	3420	2508	3112	4056	4647	5949	5074	4351	2885	5842	9520	3749	8103	6411	11641	23990	20421	14134	3475	3250	6785	4647	5821	4635
PCHAS_0606100	3367	4231	2716	2609	3847	4832	6301	8055	9213	4054	2464	4292	513	85	1444	703	1084	430	661	1628	1108	2808	1390	1244	1695	3135	10068	6555	2205	21863	21108	14924	10915	11099	17967	10638	17127	8202	753	836	1495	1486	2625	944
PCHAS_0606200	53	60	59	39	63	60	83	101	179	39	27	61	22	6	16	48	41	19	16	33	46	86	54	46	62	216	483	387	147	866	964	556	368	377	636	188	368	189	20	30	45	55	103	44
PCHAS_0606300	3558	3616	5749	5102	3321	2203	1504	3039	3803	863	1295	5205	1996	81	2142	3521	2442	936	2685	2979	5804	11021	9413	11108	13711	11175	10271	9043	6507	12790	8977	6365	9808	9225	12602	18298	19092	12263	6067	5088	11058	16241	7879	11085
PCHAS_0606400	783	1070	1219	1063	757	670	606	1096	1196	439	576	1967	675	27	881	1153	915	393	731	861	1903	3275	3012	3140	3340	3182	2658	2403	1751	3064	3397	1622	5258	4079	7052	5917	6510	4129	1472	990	2202	5320	3248	3656
PCHAS_0606500	249	157	467	349	225	124	50	117	211	39	55	107	31	2	22	65	47	14	141	158	592	322	268	733	1163	1967	2181	1681	924	2166	2038	1430	417	527	836	545	851	307	61	62	134	164	395	264
PCHAS_0606600	3461	3812	6633	5172	3213	1572	1250	1768	2419	647	618	1849	1486	65	1735	3292	2579	990	3042	3333	6433	12550	9664	11582	15026	12427	11473	10554	6888	12110	5923	5885	2941	3882	4637	3557	5405	3181	3698	2376	6359	15219	6926	10151
PCHAS_0606700	52	67	77	70	43	19	15	60	39	9	69	1216	123	15	319	111	85	50	27	51	176	178	137	128	154	101	85	78	55	118	290	49	4174	1472	3239	15322	9560	7024	532	1042	957	573	459	234
PCHAS_0606800	27	30	61	37	18	14	13	12	18	11	6	53	5	0	14	27	12	3	21	13	143	93	89	102	151	189	186	154	124	142	165	115	121	74	191	558	413	222	34	41	53	69	142	92
PCHAS_0606900	73	56	21	21	7	12	5	14	9	6	12	86	24	8	65	141	112	78	29	20	23	56	36	72	55	51	41	25	27	26	20	21	65	68	100	156	129	115	24	38	42	47	28	23
PCHAS_0607000	1376	1432	2336	2106	1231	524	319	442	620	212	184	966	810	23	887	1623	1115	491	1142	1251	2387	3885	3549	4334	5212	4063	3708	3294	2343	3688	1728	1762	647	853	1123	1965	2409	1770	2279	1376	3455	5932	3105	4412
PCHAS_0607100	1219	1571	1935	1763	1251	673	586	906	1056	311	370	1139	628	34	904	1458	1305	487	1090	1272	2578	6229	4122	4807	6359	4862	4598	3679	2669	4593	2727	2397	2547	2519	3056	2628	3791	2184	1787	1268	2736	6755	2957	4359
PCHAS_0607200	220	231	398	306	201	99	76	83	121	43	25	69	15	3	32	72	57	22	130	145	900	696	648	1255	1884	2793	2854	2351	1543	2891	2277	1795	445	565	804	507	834	317	52	32	153	382	613	688
PCHAS_0607300	37	17	27	17	10	6	2	5	12	0	7	32	12	9	37	46	46	22	16	14	8	57	31	49	75	57	27	43	20	25	24	19	56	22	51	75	79	45	7	4	12	25	22	19
PCHAS_0607400	263	173	92	81	68	265	123	764	650	89	467	3134	175	29	477	304	361	133	70	79	303	544	315	285	357	240	163	126	68	494	2515	373	13618	9062	11414	14722	15186	10517	851	1631	1589	1133	579	350
PCHAS_0607500	892	940	1494	1405	848	446	290	447	618	176	167	800	617	17	536	951	763	294	701	846	1616	2738	2464	2727	2926	2980	2891	2301	1673	3210	1874	1745	808	828	1304	2204	2429	1952	1529	980	2716	3932	2467	3063
PCHAS_0607600	126	256	66	33	21	26	10	9	22	16	29	189	99	37	248	515	509	368	101	31	18	34	25	28	17	56	23	10	15	20	11	20	40	32	87	96	53	49	19	17	15	25	44	10
PCHAS_0607700	7	12	4	3	1	1	0	3	2	0	2	3	4	2	6	24	16	13	2	6	15	18	8	20	23	37	24	26	12	31	29	19	27	9	20	21	29	17	2	6	9	12	16	10
PCHAS_0607800	221	233	353	346	236	176	138	189	308	129	80	220	17	2	60	104	104	41	149	207	547	353	276	472	631	1004	1068	800	530	1010	1382	774	416	394	661	524	729	308	45	52	91	194	443	367
PCHAS_0607900	244	247	445	429	188	115	56	92	162	59	41	215	179	3	201	435	320	136	256	231	943	1769	1284	1158	1457	1113	1167	927	700	1078	722	620	295	332	389	487	683	467	782	480	1171	1951	1195	1540
PCHAS_0608000	508	1077	364	96	100	99	36	81	143	55	127	808	473	207	1068	2453	2431	1543	457	111	77	160	142	162	90	266	113	64	43	110	80	103	106	104	376	505	216	134	52	43	48	87	145	60
PCHAS_0608100	83	120	96	82	53	40	25	31	40	11	25	62	33	6	85	142	154	59	89	67	99	223	147	208	207	146	139	95	87	110	82	77	62	63	78	94	131	81	64	41	109	205	118	138
PCHAS_0608200	61	66	91	99	38	23	16	31	38	12	11	36	22	1	17	57	53	14	51	43	255	172	243	223	243	315	379	269	193	284	273	168	64	80	110	94	118	54	53	31	99	245	320	301
PCHAS_0608300	79	83	136	111	72	68	48	72	112	47	24	93	18	2	27	41	26	9	43	69	337	253	211	232	351	698	688	514	358	765	1075	559	371	307	600	358	465	226	68	40	100	184	322	232
PCHAS_0608400	356	362	601	470	241	98	66	100	116	35	34	378	528	6	386	655	510	197	396	341	1364	1955	2369	2595	2693	1795	1241	1280	962	1102	612	515	177	312	325	1252	1406	1163	1542	941	2448	5069	2081	2970
PCHAS_0608500	8	9	16	11	6	4	4	4	5	2	1	8	0	0	2	1	1	0	7	2	14	13	11	13	21	24	32	17	12	25	44	20	11	12	22	27	23	16	4	1	13	9	20	17
PCHAS_0608600	409	483	827	706	485	250	225	284	393	153	125	278	121	6	173	328	277	103	360	383	1680	1928	1387	1492	1785	2596	2486	1907	1280	2497	2357	1461	802	660	1128	897	1310	599	523	246	742	1544	1983	1712
PCHAS_0608700	345	348	366	312	363	278	296	441	536	131	125	264	24	4	88	69	68	30	66	168	81	93	85	177	372	504	1254	998	361	2360	1455	1127	848	1075	1292	958	1552	617	62	88	155	141	113	82
PCHAS_0608800	21	17	31	21	16	8	9	25	24	5	15	27	7	2	16	19	18	23	11	15	37	55	45	90	120	110	109	94	53	160	126	68	149	162	190	188	235	99	10	15	21	42	47	33
PCHAS_0608900	452	549	821	702	502	351	326	382	465	318	113	238	44	3	96	173	155	54	291	401	725	407	308	648	938	1895	2091	1564	1006	2133	2228	1570	578	593	949	516	778	391	51	47	101	192	452	347
PCHAS_0609000	55	33	129	96	37	19	8	7	23	5	7	23	5	0	10	26	17	7	18	35	325	170	214	369	498	800	816	630	459	666	481	413	89	73	138	92	154	66	29	23	62	155	225	264
PCHAS_0609100	1038	1132	1670	1609	1021	522	356	536	790	215	197	1382	1102	23	862	1608	1046	445	926	1060	4455	5364	5484	4740	4731	6097	5392	4294	3267	5144	4126	2947	1313	1642	2019	3357	3989	3335	5105	3104	8583	8476	6993	7365
PCHAS_0609200	2425	2599	2491	2641	2474	2416	1976	3727	4366	1185	1536	5051	289	52	912	720	691	269	590	1515	1167	833	1168	3327	4170	5905	8372	6294	3240	14992	14429	6909	13533	11080	20471	14572	18705	7990	739	775	1669	1504	1468	1364
PCHAS_0609300	249	360	386	380	255	162	184	161	200	133	56	133	25	4	84	159	133	59	172	255	623	521	326	520	750	1125	1201	869	627	1075	1098	755	300	297	450	268	396	208	71	30	99	331	519	455
PCHAS_0609400	786	1139	1506	1303	880	492	586	491	589	541	149	362	225	9	422	646	700	270	792	961	2440	2305	1539	1551	2060	3405	3088	2370	1739	2617	2256	2023	428	504	773	678	872	419	461	245	591	1531	2491	1986
PCHAS_0609500	595	652	597	583	469	797	636	1839	2027	412	957	3737	488	33	1022	762	718	304	373	441	707	1018	960	1357	1362	971	977	823	607	1883	3192	1067	10566	7096	10490	12538	12650	7259	763	1030	1503	2133	1157	1341
PCHAS_0609600	357	344	479	391	279	226	188	276	432	120	134	963	142	14	282	232	185	83	155	214	556	503	449	712	1102	1289	1483	1104	808	1669	1613	1052	820	691	1216	6937	4205	3249	642	953	1058	449	810	536
PCHAS_0609700	8	5	7	2	2	3	0	3	5	1	1	16	6	2	8	15	16	3	1	6	9	29	22	24	22	28	19	18	10	23	17	17	22	19	40	45	43	29	2	8	12	11	23	10
PCHAS_0609800	4	4	9	3	2	3	0	4	1	2	1	8	2	0	4	6	5	1	3	3	26	22	7	16	32	44	41	44	31	48	48	29	27	19	29	35	45	15	6	5	6	8	19	9
PCHAS_0609900	301	336	411	400	277	285	290	385	485	175	203	519	44	7	113	101	117	34	152	254	482	296	238	483	819	1292	1543	1262	712	1932	2974	1348	1439	1239	2362	1501	1929	909	116	97	193	243	555	286
PCHAS_0610000	116	83	237	179	119	77	53	80	149	38	36	187	15	1	28	50	39	14	57	97	652	393	342	530	861	1555	1796	1255	788	1972	2702	1295	1077	1015	1483	1080	1508	653	118	136	178	228	598	341
PCHAS_0610100	250	280	469	397	239	174	170	226	352	120	109	386	50	1	115	177	135	40	181	246	625	541	491	873	1071	1369	1308	1091	666	1457	1632	965	1017	937	1490	1207	1581	721	110	148	259	425	558	581
PCHAS_0610200	150	214	279	254	162	118	141	186	225	87	63	177	22	4	53	66	66	22	95	161	386	344	284	423	634	972	1199	827	490	1336	1344	903	756	554	1054	743	1078	486	50	74	104	217	287	339
PCHAS_0610300	61	70	133	107	56	43	28	53	61	14	23	178	51	3	58	115	71	31	42	46	722	720	779	605	613	1095	867	672	492	915	1457	626	923	530	1393	1764	1414	736	378	308	823	842	1263	948
PCHAS_0610400	1012	1087	415	231	113	115	32	92	139	49	225	1184	709	209	1162	2666	2693	1445	503	230	90	135	186	236	120	333	133	95	53	176	73	132	415	251	905	1220	727	401	75	143	136	195	159	63
PCHAS_0610500	61	56	158	122	65	30	12	15	22	3	9	29	13	2	20	75	40	13	70	44	614	510	498	533	616	1068	862	683	528	639	611	448	66	84	160	83	150	59	58	35	108	377	675	562
PCHAS_0610600	3	2	5	2	3	3	2	3	5	2	2	14	5	0	3	12	12	2	2	5	50	53	45	50	61	85	81	56	47	64	39	44	8	12	22	18	25	9	8	10	17	36	45	38
PCHAS_0610700	637	813	1201	1014	658	347	335	326	429	206	108	214	117	16	265	502	393	162	538	647	1187	1318	1199	1644	2083	2455	2626	2087	1415	2595	1478	1392	425	460	722	510	849	342	171	88	347	1223	1011	1381
PCHAS_0610800	226	253	435	347	222	110	97	87	130	79	44	66	40	7	77	174	151	49	200	241	717	610	578	758	841	1295	1207	1064	644	1111	792	758	150	171	262	185	296	115	81	55	211	559	580	732
PCHAS_0610900	729	764	1206	1107	606	247	144	155	231	88	79	1059	969	11	805	1259	811	405	822	705	3478	6512	4947	3966	4689	4070	3197	2824	2307	2479	1449	1310	373	565	608	3788	3595	4312	4745	3738	8516	9029	5513	6297
PCHAS_0611000	224	250	330	325	174	104	83	94	137	62	48	252	97	10	167	314	253	115	184	197	936	886	862	766	920	1345	1224	1055	775	1102	1231	806	553	428	750	1148	1105	620	288	241	519	797	1333	1086
PCHAS_0611050	0	2	1	1	1	2	1	1	2	0	0	7	0	0	0	2	1	1	1	3	30	19	25	21	27	33	40	27	19	46	77	28	14	10	26	70	84	36	14	4	16	15	38	20
PCHAS_0611100	132	129	233	211	111	86	59	72	135	54	42	89	11	1	32	81	53	20	95	97	503	333	335	454	621	955	1095	900	601	1097	1408	773	403	517	593	507	644	295	81	112	166	265	499	395
PCHAS_0611200	492	446	199	100	46	41	10	41	64	12	101	536	261	79	456	1172	969	634	213	120	18	42	46	105	53	70	40	29	21	47	15	27	209	151	300	386	386	227	33	58	59	102	37	21
PCHAS_0611300	1	2	0	1	0	1	0	1	0	0	1	5	0	0	0	1	3	1	1	1	1	3	0	0	0	1	1	0	1	2	0	0	1	3	4	39	24	17	4	6	3	0	4	0
PCHAS_0611400	255	308	420	388	281	181	165	335	369	73	114	400	49	3	117	195	157	54	149	239	446	660	710	1052	1292	1080	1137	925	638	1460	1232	735	1318	1093	1507	1529	2146	831	147	105	289	821	456	637
PCHAS_0611500	117	71	75	66	64	157	120	266	372	94	178	552	33	2	94	57	54	33	19	44	83	121	72	108	112	166	267	208	96	622	1127	438	1586	1435	1937	1739	2124	914	82	137	120	105	164	97
PCHAS_0611600	1304	1944	2094	1882	1485	1164	1361	1545	1773	1137	662	1808	601	42	1111	1374	1403	572	1095	1489	3980	4974	3593	2954	4126	6330	5392	4676	3168	5251	7207	3753	3414	3146	5396	3408	4374	2634	2079	1214	3118	4659	5812	4520
PCHAS_0611700	290	310	505	405	272	149	127	148	258	75	63	156	35	5	71	140	107	43	193	239	571	643	509	1010	1157	1784	1587	1293	864	1765	1258	1055	407	394	717	385	623	264	34	29	81	345	339	512
PCHAS_0611800	1750	2101	2807	2733	1691	940	565	963	1216	243	373	1173	363	55	750	1665	1212	469	1331	1690	2787	5079	3820	6937	8890	5810	5958	5008	3857	6495	3719	2767	2795	3375	3878	3796	4961	2775	800	657	1510	5660	2493	4463
PCHAS_0611900	1188	1367	626	711	1058	2286	2824	4551	5057	2263	2128	6172	359	55	1434	487	779	297	193	548	657	741	467	512	635	1177	2926	2038	654	6784	16294	4900	16278	13550	23212	15676	19120	10269	831	1290	1748	1078	2189	816
PCHAS_0612000	5178	7089	8751	7213	5578	4459	5157	5929	7258	3930	2643	6895	1732	162	3430	3724	4103	1533	3690	5167	9858	14410	10041	10332	16504	24790	20813	19828	11890	23269	27534	16225	17579	14905	26498	23399	24884	13868	3668	2511	5418	11183	12109	12349
PCHAS_0612100	5090	6214	7983	7249	4944	2777	2272	3162	3591	1447	1080	4700	4483	152	4326	6448	5466	2272	4613	5195	10579	16580	17135	20040	20287	20072	15192	13858	9311	17631	10755	8862	5348	6328	8693	12258	15124	11933	7385	4361	13839	29530	15683	19938
PCHAS_0612200	975	1078	1406	1220	887	762	716	1030	1480	613	561	1727	398	29	637	805	686	268	562	819	3088	2889	2408	2179	2893	4989	4950	3830	2467	5451	9310	3959	4303	4324	6729	6500	7196	4283	1739	1350	2660	2937	4878	3503
PCHAS_0612300	320	371	479	433	300	220	227	264	320	139	126	416	143	11	213	355	288	133	249	304	1283	1386	1164	928	1324	1933	1786	1369	1005	1603	2190	1070	911	859	1337	1088	1417	889	744	593	1373	1541	2006	1640
PCHAS_0612400	13	4	2	2	1	3	1	1	4	1	5	27	6	1	14	29	28	13	3	7	8	27	26	15	12	25	10	11	7	10	6	8	27	24	42	59	96	43	9	16	10	14	26	14
PCHAS_0612500	531	464	951	760	434	284	206	326	510	128	153	542	152	8	188	467	274	89	361	406	2981	3680	2846	2925	3765	4690	4399	3535	2576	4448	4467	2514	1860	1689	2821	2170	2994	1572	969	672	2207	3275	3450	3393
PCHAS_0612600	4665	6171	7538	6791	4797	2916	2643	3108	3961	1604	1126	3254	2069	91	2908	4311	3838	1494	4135	4693	6139	10782	8956	9602	10759	12047	12083	9559	6503	13583	7136	7868	3395	3309	6118	4913	6965	4552	3793	2673	7150	12675	7470	9896
PCHAS_0612700	347	429	585	528	379	203	176	169	249	150	61	197	37	4	106	221	166	69	254	333	1032	974	795	943	1112	2028	1918	1444	982	1869	2009	1278	426	355	750	596	758	334	171	100	271	647	1138	886
PCHAS_0612800	2120	2162	3005	2320	2192	2369	1850	4029	5033	1255	1621	3986	280	27	694	454	495	131	717	1378	1486	1015	743	2409	4430	5994	9436	7515	3444	16364	17954	9013	13959	13147	19390	10984	15748	7544	589	866	1326	1037	1706	1035
PCHAS_0612900	250	256	475	333	240	121	116	118	162	73	39	93	12	3	45	82	79	26	139	178	994	697	604	1230	1600	2574	2687	2094	1327	2677	2020	1656	396	460	699	581	813	342	65	58	143	359	647	552
PCHAS_0613000	263	254	403	300	173	176	102	143	246	76	82	396	111	12	149	418	249	103	213	207	882	716	689	668	620	1313	1182	877	588	1126	1623	746	456	393	703	1889	1370	998	313	397	595	674	1357	971
PCHAS_0613100	202	191	385	295	162	89	66	82	142	39	25	86	27	5	48	144	106	32	166	158	554	634	470	798	1137	1011	1197	919	615	1206	747	700	260	338	432	349	518	219	81	55	119	458	453	517
PCHAS_0613200	34	33	49	31	19	18	14	29	29	14	20	399	35	3	118	43	45	22	24	30	102	70	42	58	67	130	147	101	80	147	286	100	336	128	665	3373	1867	1039	168	265	319	117	529	106
PCHAS_0613300	1937	1932	1114	962	843	2307	1940	4937	4287	2250	3257	13800	802	266	3564	2736	3221	1709	706	832	1381	1459	1027	1776	3133	3350	3152	2967	1698	4730	17154	3413	31677	26660	41014	33619	40332	22162	1978	3147	4001	2206	2986	1465
PCHAS_0613400	34	29	14	8	22	117	115	231	257	137	150	804	23	2	109	27	29	17	8	15	69	52	36	21	11	17	65	30	17	195	1610	249	1529	1068	2204	2016	2239	1039	188	190	309	57	315	68
PCHAS_0613500	603	594	1020	928	538	450	310	554	905	219	349	2088	920	14	737	926	683	283	570	592	2385	3547	3159	2512	2757	2738	2643	2348	1674	2998	3042	1897	2877	2556	3881	5399	6150	4558	3566	2471	5401	5759	4237	4378
PCHAS_0613600	94	97	220	141	99	55	50	57	82	46	28	80	50	0	49	97	59	31	91	118	396	462	297	271	438	615	594	464	324	480	533	311	145	155	237	158	253	225	173	107	248	348	471	350
PCHAS_0613700	135	110	278	198	140	68	35	57	108	25	23	63	14	3	25	92	37	11	89	96	324	193	338	583	640	842	762	671	393	916	662	480	113	135	326	190	304	128	15	13	73	257	288	332
PCHAS_0613800	385	331	670	501	344	179	152	218	248	99	65	134	38	2	71	205	166	55	225	294	1086	1268	1080	1720	2264	2632	2508	2024	1306	2742	1824	1360	512	723	909	644	1068	484	141	102	278	948	887	1151
PCHAS_0613900	277	345	205	229	266	394	331	847	984	219	431	2369	118	22	443	168	219	97	61	131	207	250	212	250	291	323	735	510	237	1744	2626	954	6522	3806	7402	11213	10092	5159	359	596	747	463	622	295
PCHAS_0614000	407	368	637	513	296	216	155	293	405	90	168	461	85	9	153	264	231	85	219	280	627	1202	917	1242	1456	1392	1497	1146	820	1767	1196	929	1289	973	1542	1251	1770	681	149	99	305	992	605	811
PCHAS_0614100	1732	1853	795	403	212	178	57	161	271	82	354	2433	1115	319	1902	5129	3872	2395	762	365	138	311	366	607	215	578	259	152	122	333	145	222	550	389	1339	1793	1183	658	147	245	179	306	247	110
PCHAS_0614200	164	155	253	232	169	105	85	120	186	52	53	125	22	2	33	64	37	10	77	103	565	590	408	516	832	1573	1698	1211	829	1863	2275	1261	635	552	1073	570	874	387	121	52	160	366	590	426
PCHAS_0614300	399	478	813	547	350	170	157	174	217	88	61	188	50	10	153	352	306	88	494	425	1198	1429	1178	1822	2022	2007	1659	1444	1101	1417	1019	765	322	414	588	569	823	343	134	78	297	1226	1026	1156
PCHAS_0614400	153	209	221	217	150	114	109	93	149	81	44	125	24	0	62	112	92	31	91	157	351	566	422	530	705	858	905	778	479	911	932	612	301	298	448	327	555	203	88	65	128	403	359	400
PCHAS_0614500	218	222	398	359	182	80	66	100	110	30	27	120	50	8	103	248	167	60	161	182	513	713	735	1017	1167	1063	939	823	596	950	489	453	236	274	355	349	497	209	180	88	329	874	552	677
PCHAS_0614521	1	0	0	0	0	0	0	0	0	0	2	1	0	0	0	0	0	0	1	0	0	0	0	1	2	0	0	0	0	0	0	1	0	1	1	0	2	6	1	0	0	0	1	0
PCHAS_0614541	2	1	1	1	1	0	2	0	0	0	0	2	0	0	0	2	0	1	0	0	2	3	2	0	2	4	1	2	2	3	1	1	2	5	1	6	11	5	1	1	1	7	7	2
PCHAS_0614600	8	7	4	5	3	1	0	3	2	3	0	16	9	4	13	32	35	23	3	2	11	6	14	11	6	37	9	6	4	8	12	18	26	16	55	82	65	23	10	15	6	10	17	3
PCHAS_0614700	241	209	330	244	177	195	162	395	440	113	255	906	32	7	174	87	104	34	112	139	246	179	141	423	574	458	550	395	275	623	1119	369	2075	1315	2428	2548	3191	1252	93	147	217	206	197	146
PCHAS_0614800	275	347	475	413	310	169	127	213	250	64	73	173	13	3	36	45	43	25	99	217	188	106	97	536	1045	1184	1512	1234	615	2061	1299	969	570	733	885	751	1165	424	65	78	124	135	112	130
PCHAS_0614900	459	453	338	317	400	887	758	1882	2052	571	955	3372	159	25	480	219	281	109	109	180	338	311	241	359	492	588	1354	936	359	3378	6590	2018	11600	9561	13372	10428	13458	6464	486	819	1003	594	684	362
PCHAS_0615000	713	838	299	397	689	1866	2211	3590	4213	1699	1683	4345	179	41	818	218	358	120	118	299	369	299	189	157	246	403	2152	1421	375	6212	16393	4875	11486	13189	15600	8961	13518	7071	674	1170	1386	478	1316	474
PCHAS_0615100	384	462	668	547	338	190	202	226	329	145	90	159	28	6	73	176	152	42	239	343	721	667	484	738	998	1632	1727	1367	896	1708	1399	1119	310	295	542	322	524	211	53	39	125	365	577	490
PCHAS_0615200	250	259	419	342	190	136	110	117	178	63	52	119	65	4	105	163	144	52	156	191	857	994	888	765	1106	1586	1654	1310	841	1701	1327	1121	285	361	588	349	565	279	337	212	544	928	996	1006
PCHAS_0615300	103	105	181	178	101	62	49	56	83	23	18	71	38	2	38	72	71	34	68	109	457	521	382	446	616	674	742	592	381	753	576	449	158	163	255	187	281	138	203	90	299	538	504	524
PCHAS_0615400	2543	3553	4544	4025	2922	2061	1695	2413	2918	899	1037	4277	1666	82	1967	2846	2051	1078	2157	2727	3420	5478	4011	5289	7053	5096	6166	5294	3234	7597	4848	3419	4269	5691	5589	9456	11172	9141	4831	3677	7395	9563	4938	5639
PCHAS_0615500	653	902	1045	1020	607	246	206	142	236	140	91	910	822	23	898	1106	926	489	736	737	1543	3143	2030	1824	2613	1726	1617	1441	1170	1324	705	696	232	392	331	1476	1690	2039	2844	2253	4157	4891	2585	2725
PCHAS_0615600	220	235	342	345	204	72	67	76	72	44	52	764	686	16	623	510	414	226	299	225	1609	1946	1454	987	1164	1155	917	876	724	604	550	426	92	147	176	2068	2235	2464	3185	2272	4383	3530	3987	2759
PCHAS_0615700	2968	3492	5094	4629	3104	2461	2011	3388	4333	1340	1547	5204	819	66	1558	2221	1734	630	2060	2814	9143	11259	8918	10126	13591	20370	18672	15882	9910	20969	27966	13584	18044	17238	26294	16969	21336	12021	2743	2710	5779	9603	10998	10992
PCHAS_0615800	351	503	564	537	406	264	291	294	431	303	110	222	44	6	112	203	217	70	275	339	875	927	580	751	999	1526	1682	1258	862	1731	1898	1326	567	629	884	528	788	333	114	74	170	492	822	701
PCHAS_0615900	269	311	579	455	285	128	99	57	111	77	22	68	19	3	54	93	71	21	188	257	523	341	280	605	1077	1811	1726	1448	962	1366	1051	940	109	203	214	190	251	112	41	27	74	191	359	375
PCHAS_0616000	186	189	384	296	171	134	90	191	266	76	80	277	43	1	90	143	117	36	159	168	883	790	581	707	909	1482	1213	1047	809	1111	1665	850	936	764	1433	1055	1237	592	139	139	253	583	907	746
PCHAS_0616100	309	282	635	589	292	85	33	58	89	37	32	122	97	5	117	291	181	65	274	302	724	1216	1288	1705	1932	1850	1688	1351	1061	1408	611	755	143	178	298	269	344	184	155	80	389	1345	789	1200
PCHAS_0616200	2199	2956	3734	3282	2226	1221	1182	1096	1484	736	393	1210	845	47	1423	2258	2060	775	2154	2351	5015	7967	6535	6125	7162	8230	7672	6176	4573	7728	4625	4806	1315	1605	2526	2041	3051	1932	2636	1800	4925	8660	5791	7345
PCHAS_0616300	386	359	509	450	329	255	190	316	368	156	114	538	139	17	229	326	243	107	181	253	1971	2234	1889	1555	2301	3761	3716	2842	1754	3696	5455	2519	1860	2050	2553	4535	4084	3207	1477	1461	2451	2219	3124	2397
PCHAS_0616400	362	445	665	551	328	199	192	167	239	142	70	213	211	3	248	471	419	143	424	395	2655	1807	1656	1349	1589	2845	2259	1805	1385	1848	2292	1395	359	511	648	613	899	579	1193	730	2079	1988	3593	2397
PCHAS_0616500	438	449	725	590	415	269	194	289	405	155	112	554	227	8	277	479	373	147	337	439	1509	1449	1510	1445	1587	1944	1915	1544	1111	1878	1863	1195	1033	927	1382	1503	1886	1132	910	634	1701	1837	2090	1956
PCHAS_0616600	42	39	26	25	26	87	58	179	175	62	117	641	40	4	89	60	65	21	35	39	165	145	109	140	97	130	113	99	71	133	1004	140	1424	889	1854	1849	1919	1058	135	177	331	191	404	211
PCHAS_0616700	295	309	427	356	264	224	228	366	492	172	184	645	141	9	224	253	254	105	210	269	1042	1250	1076	1017	1286	1808	1608	1296	890	1971	2914	1233	2112	1613	3341	1676	2334	1266	443	369	859	1335	1459	1314
PCHAS_0616800	260	283	560	495	208	86	46	32	41	42	24	175	237	8	224	451	321	113	336	315	1443	1412	1337	1155	1256	1719	1214	1148	1028	636	444	429	63	63	84	296	312	326	616	389	1127	1640	2028	1905
PCHAS_0616900	156	88	72	37	42	111	72	222	220	87	154	1080	94	11	242	218	238	116	81	54	270	471	390	327	270	397	175	140	116	276	1107	294	2020	1139	2768	4401	3772	1927	210	347	475	360	681	220
PCHAS_0617000	197	201	93	70	48	69	38	113	174	29	89	691	126	34	216	458	365	221	83	49	51	73	76	87	55	72	126	79	25	243	441	146	1291	791	1355	3006	2298	1162	95	189	204	147	155	63
PCHAS_0617100	1494	1590	2770	2199	1494	916	782	912	1379	516	332	699	223	19	459	966	832	289	1289	1430	2537	3249	2349	3441	4346	5126	5155	4217	2686	5428	3607	3181	1477	1624	2414	1610	2474	1226	337	218	685	2394	2104	2576
PCHAS_0617200	44	49	56	33	17	14	10	12	17	7	11	42	13	6	28	53	47	35	23	22	27	48	33	43	73	52	64	45	26	64	48	30	38	33	61	43	65	38	6	8	9	39	39	31
PCHAS_0617300	322	362	490	446	310	199	142	189	288	88	81	131	38	4	79	177	177	58	216	264	313	419	350	609	845	823	907	772	458	1105	660	710	277	348	430	305	445	200	54	43	107	307	244	354
PCHAS_0617400	63	54	73	50	28	13	17	22	27	12	18	72	18	4	37	81	79	40	42	40	68	210	124	181	234	197	143	135	69	124	125	98	208	186	168	287	369	196	39	45	54	170	94	58
PCHAS_0617500	438	406	404	415	404	445	308	1016	1148	157	415	1452	83	17	212	124	150	74	54	211	203	260	133	507	920	893	1378	1033	585	2669	3088	1435	5026	4533	5590	5042	6618	3038	253	511	533	375	280	216
PCHAS_0617600	4	5	3	2	6	0	1	2	1	0	0	1	2	0	1	1	0	2	1	1	5	2	1	4	6	8	8	7	5	20	16	13	6	4	7	12	6	7	3	2	3	7	7	3
PCHAS_0617700	266	426	492	440	303	226	288	241	314	204	76	144	22	3	71	104	113	39	192	262	482	398	260	469	673	1249	1360	986	646	1354	1304	986	329	321	663	358	446	231	55	34	72	163	374	308
PCHAS_0617800	925	1190	1726	1455	1009	551	528	603	721	429	173	391	94	15	233	482	474	147	770	877	1967	2005	1358	1986	3022	3921	4196	3418	2136	4138	3410	2709	829	915	1420	1095	1633	736	227	156	452	1181	1535	1511
PCHAS_0617900	12	12	18	9	8	6	3	1	7	0	1	11	10	0	3	17	13	6	8	10	27	17	14	26	39	56	54	48	37	47	47	27	16	15	12	23	26	14	2	9	4	10	22	11
PCHAS_0618000	138	128	289	227	108	39	35	34	46	30	13	23	8	1	20	52	44	8	66	104	374	205	199	390	550	776	891	637	483	746	521	508	59	87	138	95	170	68	17	14	46	97	179	190
PCHAS_0618100	5	9	14	8	8	3	1	2	7	2	0	4	1	1	0	4	6	4	4	4	8	7	8	16	18	39	36	23	16	29	17	21	3	4	6	9	18	9	5	0	2	5	8	10
PCHAS_0618200	171	184	353	294	192	110	61	124	163	55	37	106	61	2	79	138	102	39	138	165	540	833	591	599	797	1045	1107	818	588	984	808	648	248	254	398	253	387	178	172	75	192	592	675	648
PCHAS_0618300	381	406	605	479	375	313	274	351	595	257	171	587	35	6	115	114	147	47	136	264	446	270	186	453	796	1517	1783	1311	885	2058	3296	1507	1329	1032	2023	1327	1815	821	153	137	211	123	424	210
PCHAS_0618400	194	250	149	98	101	115	114	163	314	67	99	305	81	29	198	358	360	231	92	105	64	90	66	159	140	408	309	299	182	532	642	352	410	335	682	304	371	230	34	51	62	66	159	53
PCHAS_0618500	712	805	1436	1040	664	391	281	449	574	200	163	349	72	10	193	397	357	125	501	661	1030	1538	1221	2141	2850	2643	2662	2319	1596	2873	1562	1423	919	1028	1326	982	1515	634	146	118	291	1234	794	1162
PCHAS_0618600	630	727	1069	915	623	409	320	521	668	250	222	700	320	15	485	840	690	262	664	591	2214	2773	2739	2506	2966	3088	2412	2163	1703	2506	2561	1434	1600	1420	2186	1919	2434	1206	1276	723	2495	3425	2778	3270
PCHAS_0618700	20	33	19	21	11	2	4	3	11	6	8	31	16	5	23	55	54	27	17	11	61	106	74	89	31	92	38	25	21	44	53	46	22	31	49	73	59	33	34	19	49	67	137	49
PCHAS_0618800	5348	6436	9165	7862	5034	3063	2864	3128	4041	2501	1213	3618	2253	74	3643	5511	4829	1866	5303	5543	20876	28262	19329	14958	17485	27410	22757	17618	13893	19086	20255	13487	5258	4770	9586	6906	9999	6130	9577	5320	13185	23282	27231	23825
PCHAS_0618900	4019	4771	7129	6075	3723	2478	2136	2502	3291	2008	1085	2806	1839	68	2751	4347	3645	1393	4214	4250	15612	19666	13156	10059	12039	20354	15359	12333	9715	13287	15324	9893	4282	4108	7406	5002	7135	4313	8774	4613	9494	15719	20319	15991
PCHAS_0619000	320	355	491	427	281	247	294	431	508	217	177	490	32	4	135	127	116	39	177	266	541	488	411	620	946	1347	1577	1295	816	1852	2211	1146	1323	1046	1865	1542	1992	822	105	104	214	325	528	415
PCHAS_0619100	906	1064	1456	1329	875	505	392	747	745	198	226	517	125	11	329	606	576	212	709	838	1614	2092	2169	3476	4146	3837	3310	2963	2147	4015	2410	1899	1361	1482	2130	1766	2765	1116	329	292	699	2342	1343	2070
PCHAS_0619200	502	481	917	754	488	280	256	256	392	205	104	267	139	10	176	412	293	109	399	438	1518	1879	1253	1143	1493	2474	2403	1698	1250	2173	1933	1417	482	549	833	474	778	370	459	246	646	1409	1791	1550
PCHAS_0619300	55	66	120	102	79	40	26	37	71	13	21	139	85	1	49	97	46	25	53	67	432	623	508	397	361	561	598	449	349	508	409	330	146	114	205	395	517	431	708	465	967	804	881	744
PCHAS_0619400	168	203	320	310	157	94	94	101	148	79	50	205	110	10	117	187	143	55	115	201	874	963	722	624	760	1337	1179	887	649	1004	1075	718	246	247	463	402	556	400	690	403	780	939	1373	937
PCHAS_0619500	19	25	22	13	15	4	7	4	5	4	3	25	10	1	16	61	45	27	17	11	88	69	39	52	61	112	79	58	51	75	64	52	17	19	43	78	47	34	67	35	74	58	149	74
PCHAS_0619600	1120	1222	1953	1649	1058	570	441	480	678	340	191	493	296	21	456	859	640	272	785	961	2564	3001	2349	2854	3628	5203	4999	3963	2655	4680	3265	2805	949	1102	1653	1169	1526	929	897	462	1569	2651	3003	2924
PCHAS_0619700	306	419	547	501	330	208	232	236	354	193	122	609	179	3	343	412	348	151	327	356	1554	1725	1198	829	1182	1625	1398	1222	824	1163	1785	868	1227	893	1634	2511	2250	1410	1293	786	1495	1662	2444	1552
PCHAS_0619800	722	1003	1335	1125	706	443	518	523	596	462	176	420	163	21	424	647	675	240	705	818	2266	2851	1813	1835	2560	3835	3152	2696	1904	2707	2847	1911	914	905	1319	1017	1469	636	434	251	853	1953	2434	2213
PCHAS_0619900	3081	3717	5592	4596	2763	1406	1039	1616	1924	526	639	2299	2313	69	2426	4896	4076	1521	3635	3320	11681	27997	17484	19416	28316	15475	13573	12814	9969	12667	6785	6026	5241	7834	6340	7726	10445	7189	8981	6610	12958	34523	12870	19050
PCHAS_0620000	259	371	446	380	250	138	177	103	119	98	36	68	13	2	48	134	110	40	222	257	521	400	292	493	663	1012	1008	746	547	887	643	534	109	187	190	155	240	107	36	29	78	233	360	335
PCHAS_0620100	395	504	478	504	327	430	456	607	681	409	333	1035	68	10	270	252	239	108	272	314	531	555	355	522	867	983	1257	1019	596	1311	2402	1004	1790	1417	2401	2102	2682	1310	208	233	321	319	686	413
PCHAS_0620200	436	580	551	529	425	271	250	429	491	126	143	288	59	8	103	223	203	89	199	341	484	553	668	1235	1446	1618	1656	1353	868	2254	1689	1114	892	893	1337	1206	1741	630	118	107	244	645	439	581
PCHAS_0620300	1799	1504	3358	2765	1768	1281	798	1558	2402	730	874	3156	562	33	727	1364	841	285	1151	1430	7983	7483	6468	6662	8437	15090	13228	10685	7033	13702	20071	9133	9372	7535	14517	9279	12159	6442	2551	1605	4833	6906	10148	8406
PCHAS_0620400	351	378	578	438	323	242	184	315	412	121	120	281	80	7	129	217	181	57	208	313	954	1019	1010	1218	1766	2296	2321	1813	1295	2675	2362	1384	1031	1047	1571	842	1419	680	244	184	463	1144	1017	1107
PCHAS_0620500	245	219	395	360	164	82	61	66	112	26	49	318	234	9	172	333	227	99	205	177	856	1701	1448	1238	1370	1233	1147	926	657	1011	506	542	191	219	322	874	1006	896	1044	721	1598	2455	1357	1625
PCHAS_0620600	862	1082	1560	1250	785	513	584	608	810	476	225	546	161	13	382	646	637	198	781	886	2709	2824	1973	1957	2853	4130	3819	3246	2220	3343	4033	2431	1113	1320	1875	1616	2257	1109	536	286	889	2086	2887	2262
PCHAS_0620700	18	22	16	5	8	34	16	106	94	23	68	320	13	6	64	42	44	19	8	9	51	77	47	36	20	32	36	11	15	66	821	83	1187	740	1507	1751	1636	819	72	141	196	87	183	69
PCHAS_0620800	8335	11177	14507	12328	8087	5081	5493	4862	6002	4808	1894	5192	3749	200	6252	9008	9014	3537	9441	9411	29288	41817	24760	20127	26150	36977	29679	24404	18134	24424	27149	18426	7286	7174	12602	9948	13403	8833	17706	7995	19487	33202	37485	29815
PCHAS_0620900	132	123	74	72	42	17	13	12	41	12	28	180	107	24	157	322	227	157	99	44	355	935	517	678	407	756	177	164	125	169	105	194	244	202	407	451	369	292	91	99	175	335	747	217
PCHAS_0621000	725	1144	1220	1125	875	570	726	794	977	587	276	518	104	13	276	407	408	159	489	689	1882	1767	1268	1502	2243	3987	3783	2973	2043	4059	4764	2884	1319	1437	2316	1286	2037	980	227	158	401	1041	1797	1404
PCHAS_0621100	265	323	437	409	254	189	173	218	298	160	118	418	112	10	207	339	252	82	225	290	1225	1463	869	666	1080	1514	1272	1081	794	1130	1824	834	896	809	1287	1111	1276	670	711	416	853	1229	1695	1136
PCHAS_0621200	77	76	134	104	51	39	33	52	75	22	30	155	41	1	60	76	55	15	59	74	444	478	422	290	383	670	589	445	319	512	725	384	441	296	658	591	640	360	348	214	446	493	750	564
PCHAS_0621300	190	99	274	235	128	82	39	64	113	32	39	184	51	4	39	150	70	23	107	120	718	869	714	671	804	1312	1439	1026	706	1352	1070	857	335	360	585	1262	972	472	333	248	551	760	907	852
PCHAS_0621400	47	51	11	20	27	24	25	145	88	38	123	3169	374	30	897	216	212	116	25	37	528	345	365	188	145	124	77	64	54	56	858	48	11377	3933	10839	47662	31985	20982	1387	2245	2520	1596	1947	801
PCHAS_0621500	440	523	842	674	408	184	142	243	299	78	72	300	253	9	289	587	450	168	409	419	1130	2275	1691	2032	2748	1933	1639	1438	1105	1563	790	738	514	617	687	729	1057	648	586	427	1154	2924	1370	1940
PCHAS_0621600	1319	1629	2529	2020	1243	692	802	805	938	516	241	699	492	22	711	1203	1036	397	1153	1326	5057	7521	5218	4968	6659	8393	7786	6459	4326	7418	6067	4878	1658	1903	2954	1859	3029	1594	1805	950	2620	6238	5854	6296
PCHAS_0621700	441	578	736	660	483	388	392	437	648	338	249	911	325	9	394	472	446	193	348	496	1448	1398	1224	942	1157	1878	1862	1312	1053	1746	1915	1297	989	778	1368	1546	1848	1369	1142	966	2170	1628	2270	1809
PCHAS_0621800	598	560	983	811	501	303	191	332	540	136	193	1158	670	14	548	883	596	272	539	542	1676	2435	2130	1870	1922	1872	1722	1459	1065	1806	1256	995	1125	865	1436	2530	2677	2020	1953	1599	3336	3808	2421	2731
PCHAS_0621900	621	834	857	793	594	595	665	722	915	657	315	941	139	22	388	434	475	210	420	571	1559	1577	1035	974	1562	2543	2775	2085	1440	3189	4886	2148	2312	1893	3253	3707	4026	1958	722	491	913	1201	2139	1306
PCHAS_0622000	402	705	230	87	58	78	19	43	69	42	99	531	256	125	631	1484	1270	853	271	99	49	54	71	96	46	137	52	25	23	70	40	45	59	62	246	282	178	78	22	42	37	49	105	31
PCHAS_0622100	224	460	126	56	45	42	13	29	52	28	52	341	164	87	473	906	949	542	191	76	43	57	56	80	31	112	45	25	24	47	43	36	91	71	186	254	169	116	49	48	69	51	102	39
PCHAS_0622200	290	226	628	477	253	110	69	101	218	64	46	130	74	5	79	284	162	58	322	236	1453	1529	1186	1145	1347	2024	1771	1451	1150	1354	1215	992	234	280	451	275	478	254	273	139	478	1090	1580	1418
PCHAS_0622300	71	42	13	20	6	6	3	4	13	2	10	58	15	5	36	117	83	60	18	21	31	64	58	40	33	52	24	22	13	22	21	14	53	51	90	99	140	88	26	22	36	48	69	29
PCHAS_0622400	44	53	26	18	9	4	5	8	6	7	11	62	25	13	55	123	94	82	37	17	42	105	70	83	42	121	29	36	16	29	39	37	72	72	144	126	119	92	16	22	19	45	103	41
PCHAS_0622500	32	27	11	9	4	4	3	5	4	2	8	18	16	8	30	59	62	34	14	10	21	36	17	36	39	53	13	9	16	13	8	11	13	23	36	40	51	17	6	7	11	28	23	15
PCHAS_0622600	1228	1257	1733	1619	1064	757	612	1021	1311	345	413	1515	803	36	954	1406	1101	434	1001	1030	2112	3010	2782	2753	3090	2888	2837	2373	1659	3117	2475	1672	1826	1626	2538	2868	3554	2251	1779	1143	3077	4512	2925	3570
PCHAS_0622700	102	102	199	153	83	49	39	49	63	35	27	74	39	2	36	115	79	28	106	87	439	313	270	301	416	752	533	501	387	535	549	341	212	203	285	155	248	127	61	40	131	208	439	397
PCHAS_0622800	102	117	216	177	95	38	24	21	24	32	6	46	38	2	76	159	106	33	129	122	958	1024	626	528	748	888	697	556	399	427	376	288	42	73	80	79	79	65	244	120	339	690	1073	722
PCHAS_0622900	694	782	1386	1175	617	261	176	164	251	123	77	314	344	12	414	914	694	267	801	722	2023	3113	2547	2868	3384	3060	2570	2206	1618	2249	1137	1198	263	348	466	556	752	379	702	312	1270	3381	2205	2868
PCHAS_0623000	141	142	66	75	56	251	199	671	560	157	371	1840	99	15	352	132	204	90	52	63	212	218	184	198	170	152	150	117	68	446	1881	334	7507	4682	6637	10769	9373	4806	389	585	794	508	525	286
PCHAS_0623100	1260	1554	2035	1801	1253	814	733	978	1251	419	334	841	358	22	584	991	933	317	965	1232	3070	3529	3202	3794	4662	5680	5502	4451	3162	6237	4948	3192	2018	2200	3191	2400	3597	1594	669	466	1575	3853	3290	3702
PCHAS_0623200	307	334	587	440	321	194	159	252	263	97	84	287	32	5	58	65	61	27	118	206	387	334	248	607	1239	1343	1931	1520	902	2509	2000	1357	1199	1353	1482	1416	2071	964	141	244	309	348	322	307
PCHAS_0623300	581	723	539	641	528	744	635	1234	1280	544	665	2246	169	19	585	443	497	184	361	476	820	1071	763	1155	1758	1474	1567	1244	782	2061	3809	1187	4730	4392	5893	5192	5860	3139	323	408	741	1207	942	964
PCHAS_0623400	293	283	457	417	265	128	96	115	199	62	59	159	82	4	112	264	176	68	199	228	1047	1105	1085	1097	1104	1718	1657	1191	882	1622	1118	1039	308	275	571	374	569	269	279	123	573	1096	1108	1288
PCHAS_0623500	160	165	305	252	147	108	66	76	133	44	33	89	41	1	60	115	66	33	133	138	648	723	533	685	886	1208	1207	902	589	1160	914	736	270	245	470	278	423	206	142	67	214	587	622	640
PCHAS_0623600	403	509	750	693	359	180	159	120	198	154	63	343	374	17	368	632	547	224	381	496	2134	2390	1750	1385	1632	2680	2156	1826	1266	1553	1312	1182	272	288	473	539	618	608	1442	684	1950	2509	3117	2535
PCHAS_0623700	87	61	32	14	9	8	3	4	10	2	19	86	48	13	76	121	188	76	18	22	48	183	133	93	56	91	42	12	23	45	24	33	94	29	112	172	253	102	13	9	31	87	107	61
PCHAS_0623800	92	65	29	36	33	152	81	354	308	98	250	1361	67	9	238	163	157	73	28	47	147	169	165	162	126	158	98	63	55	247	1886	264	4371	2591	5437	6065	5773	2866	268	479	723	352	446	209
PCHAS_0623900	1041	1093	1682	1535	954	647	449	1001	1081	247	378	968	211	18	374	733	589	203	714	931	2965	6611	3872	5861	10304	6183	6176	5437	3559	7580	4768	3363	6683	7614	6296	6791	8679	4426	1196	1363	1976	6330	2602	3717
PCHAS_0624000	250	285	437	378	243	161	155	167	247	118	62	138	25	5	42	90	67	33	115	199	273	158	110	279	515	927	1176	868	571	1292	1246	838	290	309	512	348	479	224	43	55	100	99	214	143
PCHAS_0624100	1361	1123	521	330	119	115	49	129	178	35	272	1097	652	190	1174	2777	2479	1592	535	325	68	168	235	315	306	311	228	180	112	282	121	139	725	526	1095	1383	1548	787	156	168	158	496	138	111
PCHAS_0624200	101	84	122	58	41	176	107	337	413	117	325	1551	120	17	248	195	184	99	62	59	119	91	102	72	64	95	109	89	46	172	1493	151	2639	1829	3493	2843	3026	1659	230	262	484	196	360	162
PCHAS_0624300	187	228	301	284	169	95	78	145	171	34	61	398	216	7	231	322	211	93	171	218	828	1061	1096	1007	1029	999	819	697	498	919	802	507	617	498	919	1374	1495	1103	1120	625	1598	1865	1386	1521
PCHAS_0624400	362	485	654	582	338	250	261	215	325	212	86	215	59	3	166	253	282	106	352	412	1423	1639	1071	1022	1314	2241	2021	1489	1092	1715	1667	1237	476	428	711	467	691	325	261	129	352	969	1424	1193
PCHAS_0624500	333	470	567	526	269	149	171	122	190	121	82	331	358	3	371	530	458	185	389	381	1336	1755	1449	1241	1643	1571	1507	1289	996	1237	873	669	225	354	388	604	801	618	1051	797	1624	2154	2177	2059
PCHAS_0624600	7	7	2	0	0	5	7	14	3	5	16	615	76	7	196	40	43	25	1	10	131	68	88	14	16	26	22	16	12	8	139	12	437	165	664	6881	3610	2611	413	578	607	184	971	176
PCHAS_0624620	182	169	220	191	126	73	87	87	87	81	44	86	30	7	89	161	112	53	138	162	400	382	245	235	484	678	538	483	377	447	666	413	183	245	312	279	343	190	130	75	205	276	439	297
PCHAS_0624640	38	50	63	38	29	11	11	13	28	16	11	21	11	3	14	28	14	8	21	35	160	98	74	80	124	249	165	154	96	135	259	133	46	49	99	84	93	43	23	6	38	79	146	101
PCHAS_0624660	39	16	11	12	16	11	21	19	7	20	13	11	8	15	8	28	14	21	6	10	14	62	32	16	30	42	21	16	13	18	88	82	25	55	53	37	59	50	76	56	176	49	42	30
PCHAS_0624700	1058	1433	1635	1544	987	711	705	717	907	572	348	2969	1472	56	1943	1933	1729	807	1155	1189	5098	5880	4574	2830	3222	4329	3969	3076	2370	3111	4213	2395	1379	1444	2008	11287	9135	7801	7535	5244	10878	8147	11240	6700
PCHAS_0624800	16397	23086	8793	11778	18504	32121	33046	74716	64742	20409	27716	71979	3097	670	15859	3693	6551	2150	2156	7911	4017	4588	2360	3750	7008	7998	31736	20436	6695	79509	86161	41982	191858	197714	188788	167140	223413	126581	6593	11705	12433	9994	7664	4582
PCHAS_0624900	210	279	320	308	201	160	203	175	260	121	101	256	37	10	87	168	158	85	123	167	382	284	194	317	478	858	1048	808	485	1127	1659	790	506	625	722	662	903	434	86	81	102	182	354	255
PCHAS_0625000	2393	2557	3298	3073	1793	1040	1127	997	1262	885	404	4596	3361	99	3621	3502	3034	1652	2128	2089	586	704	671	458	493	563	426	351	340	257	310	198	111	106	177	1371	1035	798	671	468	1116	961	1205	934
PCHAS_0625100	3417	4982	4515	4597	3895	3784	4114	5698	7140	2558	2349	7668	3551	112	4014	3166	3344	1524	2124	3205	4707	9183	6811	6593	8550	9291	11014	8829	4865	16391	13724	10093	13227	15055	17410	15938	19887	15002	6263	5533	8367	11957	8996	9594
PCHAS_0625200	1654	2414	2092	2037	1195	1027	1045	860	1099	813	614	9296	7439	199	5933	4800	4353	2797	2069	1844	14560	16005	11882	6201	6564	7643	6264	5316	4061	4922	6777	3889	1928	2694	3262	27714	26982	33116	32965	21356	38622	28609	40974	22781
PCHAS_0625300	961	1009	260	339	502	4588	4648	9325	9951	4431	5930	16067	667	140	3353	755	1306	387	212	552	846	751	457	406	475	509	771	555	342	3538	30010	4128	40728	40853	50430	21651	32282	17307	1067	1725	2071	1246	2949	1252
PCHAS_0625400	23	10	2	3	2	75	61	146	155	84	109	485	11	6	79	16	23	23	1	10	50	24	18	14	8	10	18	11	12	56	1218	113	1353	899	2606	1631	1661	1100	55	102	141	55	230	75
PCHAS_0625500	820	1228	1131	1195	874	556	601	493	686	460	235	2626	1466	47	1733	1311	1137	703	547	916	2873	2440	2202	1553	2042	2979	3084	2649	1710	2852	3077	2062	781	1144	1190	9648	7811	7195	5994	5339	9473	4379	7913	4401
PCHAS_0625600	8	3	6	6	3	4	1	3	1	3	2	5	2	0	1	5	0	1	6	3	6	1	3	2	5	0	2	0	1	3	1	1	0	1	0	10	11	9	11	4	29	8	10	4
PCHAS_0625700	3	4	10	3	1	2	1	2	4	0	4	107	27	1	36	18	10	6	5	2	49	44	76	36	48	34	26	25	16	16	32	15	86	30	144	1879	735	646	111	164	164	84	182	92
PCHAS_0625800	400	443	613	580	235	126	91	88	80	121	193	4547	5111	77	3242	2798	2318	1453	987	506	13378	9577	7497	4215	3782	3683	2396	2291	2159	991	1435	1003	492	687	675	23605	22505	25742	30697	17366	33201	20067	41532	18026
PCHAS_0626000	936	891	1716	1447	767	340	293	283	437	248	148	1177	1345	27	979	1458	1081	499	991	1025	6114	6773	5590	4121	4851	6535	4568	4230	3245	3335	3231	2344	616	751	1091	4115	4085	4187	6186	3567	7720	8425	10704	8489
PCHAS_0626100	1872	2293	3998	2902	1905	791	797	405	450	595	114	231	87	23	287	679	713	211	1684	1764	4017	3398	2190	4108	8528	13783	11192	9290	5660	8276	6721	5883	649	1299	1287	1768	2020	1028	310	277	590	1193	2404	1778
PCHAS_0626200	40	41	8	11	21	177	181	316	383	196	161	405	15	2	81	24	19	13	5	20	18	5	17	5	15	15	24	12	6	45	270	64	448	427	571	287	510	169	32	18	35	18	68	14
PCHAS_0626300	271	320	289	307	292	257	243	288	367	145	85	134	17	1	53	49	58	19	61	211	86	64	52	91	150	397	424	335	142	596	473	288	208	284	379	190	342	130	24	28	33	58	92	63
PCHAS_0626400	43	58	46	48	62	58	53	60	62	25	11	29	8	0	11	12	6	7	11	33	8	12	11	6	2	8	10	8	2	17	9	2	14	4	25	134	63	43	41	42	51	23	34	27
PCHAS_0626500	250	361	225	259	299	280	275	255	378	165	82	120	15	4	66	62	53	30	66	167	2	6	6	8	6	17	22	19	11	45	21	6	12	9	17	15	17	14	8	5	15	8	9	10
PCHAS_0626600	276	365	298	296	287	251	224	196	328	131	58	132	12	6	41	49	32	22	47	194	25	11	15	23	28	47	54	52	21	86	43	55	18	25	13	39	46	33	38	17	29	27	36	25
PCHAS_0626700	23	27	2	7	7	92	101	160	207	65	81	237	6	4	32	6	18	7	4	9	1	0	2	0	1	1	4	2	0	8	35	9	40	52	39	42	38	22	3	1	5	3	2	1
PCHAS_0626800	514	779	334	497	709	597	668	599	851	366	132	229	27	6	100	45	59	26	48	314	9	11	9	8	14	46	85	102	36	214	147	128	68	68	111	38	47	32	3	6	3	7	7	6
PCHAS_0626900	26	28	5	9	8	140	140	251	309	151	156	402	16	4	76	25	30	12	4	16	0	0	2	1	0	3	1	0	0	0	25	6	39	39	58	43	53	21	1	1	1	2	6	2
PCHAS_0627000	169	177	133	131	150	284	286	530	551	246	221	523	31	6	140	52	55	25	39	75	2	7	3	2	6	4	5	8	2	15	51	12	30	30	53	38	43	29	5	3	5	4	7	4
PCHAS_0627100	91	63	7	11	39	440	427	732	847	483	404	1153	47	8	203	55	62	30	11	46	2	4	1	3	5	1	0	0	3	17	57	11	109	138	186	99	135	56	6	2	6	7	24	3
PCHAS_0627200	53	49	38	35	36	117	128	183	237	139	90	198	7	1	33	26	14	10	12	30	1	2	1	1	1	1	4	1	2	3	12	2	12	7	4	2	13	4	0	0	0	0	3	0
PCHAS_0627300	11	15	15	7	11	2	3	2	6	3	2	25	16	0	16	11	11	7	5	10	6	4	5	5	6	6	3	4	7	1	3	1	2	1	0	3	7	8	8	3	7	5	18	7
PCHAS_0627400	324	449	613	446	258	210	205	271	308	104	136	495	423	19	474	550	504	189	422	414	99	148	107	103	108	99	85	81	61	77	97	55	44	43	53	56	67	57	72	61	106	171	187	133
PCHAS_0700100	37	55	81	83	31	15	12	16	19	8	9	116	153	2	120	167	107	65	97	73	485	432	317	224	178	167	128	110	109	101	87	47	30	26	25	302	273	279	607	331	918	648	956	534
PCHAS_0700200	1	0	2	0	2	7	5	11	10	1	4	23	1	0	1	0	7	1	0	0	25	9	13	10	24	25	17	13	13	47	131	31	124	105	172	94	155	85	13	12	15	20	26	13
PCHAS_0700300	2	2	5	7	8	1	3	7	9	3	1	10	3	0	0	1	3	0	3	0	17	15	15	17	28	50	39	33	28	125	129	68	148	60	88	53	131	62	4	10	15	17	16	17
PCHAS_0700400	125	143	169	144	98	144	139	196	234	94	81	234	18	5	75	66	88	30	61	84	192	182	163	221	279	334	406	309	213	564	944	477	643	551	1096	971	1021	510	81	73	166	141	221	203
PCHAS_0700500	21	5	28	21	14	16	12	11	50	5	15	64	5	1	7	13	6	2	7	19	51	40	39	42	69	167	188	133	85	237	336	167	95	114	165	126	223	107	25	27	59	28	71	38
PCHAS_0700600	89	102	111	104	82	74	71	96	90	36	31	109	20	3	55	95	77	30	49	73	87	131	96	88	125	144	153	134	77	209	230	140	124	149	197	133	187	116	33	38	61	121	125	120
PCHAS_0700700	5	9	18	13	16	14	12	8	7	8	1	5	1	0	2	1	6	4	3	6	27	32	12	31	59	49	84	85	21	108	127	64	76	66	133	114	130	65	10	11	20	37	26	30
PCHAS_0700800	56	53	72	88	47	21	16	13	18	20	25	412	357	7	225	182	130	93	53	51	588	622	514	325	321	340	285	268	206	193	202	129	63	86	113	1559	1259	1518	1270	1129	1589	1065	1908	1171
PCHAS_0700900	5	3	3	2	1	18	10	19	23	8	21	58	3	1	11	6	4	0	2	5	5	13	6	11	9	17	10	13	1	26	88	22	96	66	138	100	112	83	43	42	61	15	17	8
PCHAS_0701000	67	44	20	29	33	101	123	286	240	98	166	338	14	4	97	11	26	14	8	29	14	25	9	18	23	45	96	66	14	283	257	126	425	376	641	437	481	255	17	11	23	14	26	15
PCHAS_0701100	8	9	6	12	2	5	4	9	8	2	8	98	54	2	28	36	14	19	7	12	60	58	38	24	22	23	15	20	9	17	31	12	66	43	72	422	351	422	393	305	507	107	228	74
PCHAS_0701200	21	20	17	20	5	7	3	11	9	5	40	1115	535	11	462	144	130	118	17	27	669	426	378	127	99	97	69	67	63	30	94	28	201	124	234	5627	4549	5249	2593	2371	3304	1329	3140	1155
PCHAS_0701300	8	7	14	13	10	10	11	34	53	12	40	149	11	1	34	19	10	2	8	5	45	29	35	21	27	32	29	15	13	65	171	56	212	126	253	553	467	347	444	398	581	71	189	63
PCHAS_0701400	9	16	6	10	7	27	28	79	69	20	37	66	3	2	13	4	14	3	2	7	8	4	4	9	13	23	45	31	10	124	113	64	284	223	312	227	296	109	6	5	9	17	15	14
PCHAS_0701451	9	2	10	7	7	6	4	2	10	4	1	13	6	1	9	7	4	2	5	7	22	13	8	14	24	19	25	14	8	20	52	17	18	20	28	76	91	39	37	17	33	16	30	12
PCHAS_0701500	1010	1161	1321	1290	711	376	405	414	507	323	346	5329	3676	108	4088	2908	2666	1473	1425	1090	7424	7804	6803	4047	3731	4176	2841	2789	2317	2038	2546	1607	1263	1135	1687	24093	17311	17638	9369	8256	15923	12725	19944	12661
PCHAS_0701600	8	4	0	1	3	5	1	11	10	5	0	13	0	0	0	1	0	0	0	1	1	2	2	0	2	3	8	6	2	27	39	9	58	56	86	53	93	30	2	4	3	0	8	3
PCHAS_0701700	4	2	5	3	2	5	2	9	14	6	3	6	0	1	2	1	1	1	0	5	10	2	2	4	8	8	10	9	5	32	46	13	22	23	48	23	54	21	1	0	6	3	6	3
PCHAS_0701800	703	1093	1210	1063	739	485	563	573	700	437	256	1295	1222	32	1246	1255	1216	572	774	892	3153	3712	2915	2064	2373	3275	2734	2314	1707	2497	2364	1753	885	869	1193	2478	3077	3158	3613	2465	5156	5483	6322	4424
PCHAS_0701900	753	1072	1243	1220	681	534	553	697	789	453	380	3169	3649	60	2695	2928	2400	1344	1090	982	8250	7288	5798	3453	3784	4571	3358	2974	2263	2790	3742	2257	1483	2035	2155	7106	7781	8695	15877	8176	17687	12765	20061	12016
PCHAS_0702000	525	632	796	683	438	394	342	363	540	259	208	1202	810	24	659	771	657	308	472	511	3228	3129	2714	1781	2086	2949	2501	2065	1667	2118	3069	1656	1414	1502	1925	3405	3709	3171	3683	2682	5398	4567	7025	4718
PCHAS_0702100	229	161	41	41	114	1400	1191	2717	2962	1555	1958	7424	152	25	1071	176	355	112	43	106	25	15	13	12	11	14	16	17	6	34	605	57	588	566	766	504	572	355	20	34	46	12	65	16
PCHAS_0702200	190	273	182	196	178	324	361	564	663	328	303	1495	139	33	433	177	225	104	71	104	265	180	137	160	213	360	600	488	208	1069	3089	838	4467	3269	5753	7856	6217	4109	330	661	741	386	1045	306
PCHAS_0702300	164	122	65	61	89	381	223	864	901	226	520	2201	85	15	276	84	111	35	22	57	170	136	100	127	112	113	264	156	92	819	2459	573	5543	3977	6316	5553	6568	3204	277	370	502	286	360	177
PCHAS_0702400	408	520	632	663	432	255	242	251	397	180	123	328	148	12	209	392	284	120	310	387	1513	1425	1110	1034	1437	2282	2019	1711	1139	1900	2406	1332	744	764	1297	894	1034	621	502	311	812	1335	2088	1615
PCHAS_0702500	19	11	23	4	9	7	6	11	9	5	2	18	3	0	9	22	12	13	6	14	7	21	7	19	36	17	10	7	11	18	17	10	39	30	29	30	30	29	5	8	6	6	6	5
PCHAS_0702600	641	748	982	863	669	571	577	774	1004	389	300	633	76	11	205	212	205	73	313	471	796	706	490	977	1411	2522	2950	2194	1259	4002	3709	2659	1716	1355	2595	1997	2620	1202	134	129	281	358	675	501
PCHAS_0702700	193	185	322	298	165	113	77	139	203	56	52	137	23	3	51	79	90	26	128	153	324	257	238	498	686	849	929	748	494	1158	898	719	373	356	547	557	640	295	43	64	92	173	242	252
PCHAS_0702800	256	214	447	340	192	90	80	99	154	51	37	84	39	8	63	167	131	36	210	215	640	821	726	974	1383	1238	1288	1091	728	1193	809	703	241	305	425	381	538	235	81	48	138	645	535	632
PCHAS_0702900	491	659	699	678	548	481	472	580	793	422	260	702	96	17	264	293	318	123	270	452	1059	937	699	792	1277	2436	2500	1954	1217	2777	4297	1938	1858	1531	3003	2280	2569	1388	280	209	390	629	1284	807
PCHAS_0703000	550	511	1068	788	543	392	277	757	832	174	360	1517	77	17	267	235	221	83	393	410	678	693	501	1585	2573	1928	1979	1645	1031	2543	2164	1220	4625	3571	4627	4429	5690	2806	269	354	415	612	490	487
PCHAS_0703100	966	740	294	215	72	73	8	68	93	19	176	973	540	137	818	2074	1776	994	354	243	82	214	308	486	380	353	183	140	125	198	88	111	1230	919	1415	2243	2777	1393	237	325	324	866	235	158
PCHAS_0703200	6	3	7	1	1	1	0	0	1	0	2	14	8	0	4	13	13	3	1	1	31	75	47	36	23	46	25	8	11	15	0	12	22	9	31	33	30	25	7	9	15	22	54	19
PCHAS_0703300	25	16	63	36	15	4	7	13	9	4	5	10	1	0	6	33	25	9	17	15	42	39	35	64	99	83	61	66	34	75	46	39	14	20	34	73	76	25	7	0	17	41	28	45
PCHAS_0703400	206	229	340	275	163	100	94	107	161	88	69	270	48	6	93	166	135	58	142	169	686	644	520	552	744	1243	1114	937	673	1026	1264	706	647	580	896	958	932	498	151	131	243	397	878	583
PCHAS_0703600	61	60	28	21	17	7	5	14	23	4	20	73	46	8	59	95	98	51	33	26	69	184	147	249	139	131	48	46	32	48	29	36	142	88	139	441	382	208	40	64	87	157	178	58
PCHAS_0703700	52	25	27	20	18	23	13	27	45	14	31	141	21	6	48	57	88	50	24	17	41	66	55	63	73	92	94	69	46	168	207	90	491	473	400	631	709	399	43	80	74	67	75	28
PCHAS_0703800	471	427	378	354	372	668	613	1355	1606	373	733	2698	111	29	447	193	238	102	100	191	152	104	99	177	258	299	727	490	247	1645	2720	920	4053	2743	4583	5768	6187	2896	198	272	444	218	310	143
PCHAS_0703900	19	18	8	4	4	0	0	0	4	5	4	31	11	3	26	34	50	18	8	2	21	47	42	34	40	64	17	16	13	31	9	26	40	20	66	53	82	49	0	7	5	17	32	12
PCHAS_0704000	2	0	0	0	0	0	0	0	1	0	1	2	0	1	1	1	0	0	0	0	2	3	0	1	2	4	5	4	4	3	6	2	0	3	1	8	5	2	1	1	1	0	2	1
PCHAS_0704100	91	89	159	119	60	36	15	30	43	24	20	160	32	12	58	149	84	41	83	77	269	284	249	248	371	490	411	323	236	333	346	235	320	202	433	1016	622	407	72	100	129	214	355	212
PCHAS_0704200	493	918	301	90	69	89	29	52	113	51	118	758	335	151	873	2022	1990	1289	382	120	88	119	134	148	41	244	78	45	39	85	44	95	96	80	260	459	196	132	67	59	66	79	159	55
PCHAS_0704300	399	400	692	648	315	162	127	90	167	67	51	371	409	12	408	566	451	191	422	412	1374	1938	1571	1374	1493	1645	1516	1234	1045	1194	673	699	150	235	233	654	817	899	1306	1061	2346	2515	2036	2208
PCHAS_0704350	54	41	57	32	18	9	6	12	13	10	11	45	16	4	49	66	74	41	14	23	37	57	39	45	59	82	69	74	34	73	64	66	35	38	68	72	114	67	23	22	56	38	52	50
PCHAS_0704400	182	170	310	280	164	79	69	53	80	49	16	98	101	5	98	172	147	55	147	180	778	1052	871	1053	1339	1563	1289	1094	775	1214	777	681	243	301	379	337	493	297	337	209	529	1100	951	1031
PCHAS_0704500	84	93	101	80	49	55	52	56	77	29	30	60	12	1	23	36	46	18	26	46	58	56	36	109	220	261	357	308	162	504	378	285	139	159	288	276	375	160	25	26	40	38	55	36
PCHAS_0704600	102	103	84	89	62	69	58	83	125	30	27	84	22	4	31	50	43	31	25	57	61	50	35	75	147	203	457	266	171	638	611	368	208	241	330	246	370	170	25	40	77	41	66	33
PCHAS_0704700	257	284	406	344	271	179	173	256	352	99	112	288	26	4	80	86	92	39	95	181	187	176	119	456	889	995	1463	1114	615	2122	1567	1170	1261	1076	1734	1032	1533	767	91	107	185	139	191	130
PCHAS_0704800	3926	4358	7534	5890	3357	1668	1279	1295	1651	819	465	1432	1465	82	1966	4852	3826	1325	4690	4118	11704	11305	10793	12005	13583	15742	12925	11640	8133	10655	7537	6251	1416	2099	2799	2667	3827	1866	2484	1460	5767	11758	12585	12708
PCHAS_0704900	231	362	436	394	269	142	157	99	108	122	27	140	115	9	144	234	218	115	232	274	713	623	416	437	556	927	943	744	534	794	634	592	101	144	204	307	301	208	405	209	440	550	861	556
PCHAS_0705000	570	517	213	125	47	78	14	68	87	19	133	1170	416	111	664	1350	1174	732	254	136	142	169	216	228	163	204	104	66	54	129	313	78	3882	1710	3533	12194	8333	5515	405	929	795	606	494	217
PCHAS_0705100	2110	2360	3486	2977	2035	1448	1090	1906	2455	776	770	1867	415	29	695	1264	953	360	1428	1940	4823	3991	4263	5748	6980	10281	9938	8394	5181	12175	12055	6799	5219	5073	8493	5155	7831	3534	750	672	1876	3961	4666	5001
PCHAS_0705200	4	9	6	8	3	4	1	1	5	1	2	8	2	1	3	5	7	3	1	11	11	12	8	18	20	21	14	12	11	13	17	11	9	4	8	23	27	10	4	2	6	7	9	10
PCHAS_0705300	391	543	615	581	407	380	351	466	625	277	257	1115	159	16	447	435	410	157	348	462	1465	1403	1191	1121	1380	2108	1804	1522	1110	1711	3295	1326	1935	1410	2953	4281	3402	1973	449	511	929	1123	2037	1379
PCHAS_0705400	161	247	126	46	39	43	21	51	51	28	40	231	102	48	223	522	494	329	89	41	16	49	38	64	48	91	74	59	30	138	86	98	95	82	183	193	129	85	12	14	18	33	32	23
PCHAS_0705500	109	127	214	156	128	96	69	75	152	48	33	103	16	4	27	51	51	20	58	97	304	167	142	260	412	774	790	633	417	1016	1328	690	369	386	650	366	524	278	44	46	76	104	242	159
PCHAS_0705600	293	265	516	409	251	152	111	186	278	60	112	363	161	2	135	333	158	76	200	273	1247	1753	1362	1145	1482	2101	1843	1451	1057	1690	1846	1094	871	720	1316	917	1295	698	705	348	1080	1810	1794	1654
PCHAS_0705700	315	362	493	403	294	228	231	262	410	163	99	270	43	10	98	154	110	48	122	211	495	229	183	493	922	1699	2148	1617	922	2608	2977	1766	749	801	1494	1013	1446	604	78	62	158	122	353	247
PCHAS_0705800	27	18	12	9	8	1	2	2	2	3	10	30	9	6	25	46	49	13	6	5	15	57	33	57	50	51	33	18	10	21	9	16	47	20	69	71	110	50	9	12	33	50	21	13
PCHAS_0705900	2839	3783	5018	4311	2809	1639	1871	1655	2098	1614	595	1526	999	61	1812	2658	2663	1087	3036	3146	9171	12353	7483	6761	7684	11813	10448	7615	6263	9241	8060	6501	2239	2096	3540	2615	3779	2177	3354	1691	4149	9088	10708	8900
PCHAS_0706000	37	32	31	70	33	8	4	10	29	4	13	34	15	1	25	76	94	38	28	24	107	143	105	123	61	102	65	28	46	59	139	92	39	37	57	101	107	46	202	146	341	147	195	173
PCHAS_0706100	289	394	508	488	286	175	180	137	220	170	51	104	16	3	67	137	186	56	182	300	611	415	274	537	851	1352	1271	990	696	1060	1201	805	189	242	335	180	292	140	77	70	118	189	488	360
PCHAS_0706200	2927	3727	5152	4440	2881	1819	2004	1831	2452	1665	703	2007	1380	52	2043	2940	2739	1116	2942	3131	14041	17232	10981	8795	10600	17760	14236	11083	8710	13065	12718	9628	3385	3112	5857	4505	6143	4155	6706	3458	7875	13637	17719	14221
PCHAS_0706300	166	157	228	178	146	86	100	141	142	73	48	129	34	3	87	143	124	40	89	136	430	311	346	299	414	697	622	594	406	668	844	456	219	215	355	246	412	202	202	116	469	407	627	468
PCHAS_0706400	298	301	243	248	259	261	213	374	495	141	158	451	54	14	127	150	144	75	68	151	257	273	193	210	417	751	1618	1223	550	2831	3393	1696	1804	1592	2701	2826	2667	1626	265	345	498	321	617	294
PCHAS_0706500	11	2	7	8	1	1	0	1	0	2	2	20	12	0	22	31	33	14	4	5	15	56	30	34	24	48	25	14	8	19	9	13	51	46	77	77	95	47	10	5	21	21	16	5
PCHAS_0706600	6	2	1	2	0	1	0	1	0	0	1	10	1	1	5	12	4	2	5	0	8	17	15	11	7	19	4	5	4	6	1	7	13	6	17	18	33	14	1	4	3	11	16	6
PCHAS_0706700	62	41	47	35	12	9	3	2	12	6	13	59	32	4	73	94	112	53	47	23	118	146	117	91	108	101	76	65	42	65	40	38	65	43	95	133	175	92	35	25	65	110	160	123
PCHAS_0706800	1710	2530	2879	2671	1766	1133	1319	1223	1515	1025	416	1162	732	50	1125	1693	1644	693	1604	1799	4950	7639	4753	4537	6287	7448	6948	6128	4121	6698	5742	4825	1872	2200	3015	2411	3491	2187	2746	1668	3531	6653	5976	5945
PCHAS_0706900	225	230	388	312	204	117	100	84	142	60	32	177	179	4	159	275	221	97	177	196	1225	1368	1412	1014	1026	1694	1505	1144	869	1323	1056	857	259	289	455	569	797	545	845	635	1524	1729	1988	1819
PCHAS_0707000	234	224	327	273	219	275	245	480	655	215	295	1000	50	11	147	65	76	25	56	159	428	236	164	374	899	1413	2177	1671	826	2864	6819	2149	4537	3952	6117	4258	5740	2812	337	415	627	262	683	275
PCHAS_0707100	1077	1227	420	278	126	109	43	121	165	52	220	1921	705	193	1472	2686	2501	1531	539	253	205	210	304	323	238	344	196	164	136	232	150	147	943	416	1337	9323	5577	4380	609	881	988	564	570	266
PCHAS_0707200	92	74	200	153	94	40	53	42	70	31	16	55	18	0	14	25	14	8	42	52	229	112	91	303	513	971	1272	948	526	1540	1113	823	283	275	447	331	455	212	22	15	44	49	156	86
PCHAS_0707300	10	9	7	13	7	6	3	12	11	3	8	89	10	3	18	11	13	11	3	3	16	27	33	28	15	21	27	32	17	27	94	19	255	84	337	1152	588	310	37	49	59	43	105	23
PCHAS_0707400	484	523	839	693	521	361	311	591	825	256	292	849	105	13	193	251	192	56	250	408	1312	1567	1186	1662	2030	3577	3540	2802	1834	4174	5160	2715	2964	2122	4402	2798	3734	1590	287	215	517	984	1379	1391
PCHAS_0707500	288	260	632	491	225	131	71	78	156	41	58	187	152	3	178	397	261	102	321	309	1591	2155	1810	1398	1766	2127	1527	1501	1130	1075	1006	733	416	425	613	471	649	377	509	308	979	2021	2051	2236
PCHAS_0707600	4880	6534	8178	7256	4586	3047	3368	2949	3888	3023	1228	3388	2407	111	3883	5350	5231	2077	5237	5299	18668	22779	15090	11339	13716	21757	17347	13600	11148	14085	16121	11025	4669	4451	7931	6006	8233	5280	9785	5676	13268	20171	24615	19413
PCHAS_0707700	4330	4834	8313	6623	4349	2629	2468	2680	3798	2027	1068	3002	1887	75	2536	4006	3319	1219	4198	4249	14742	17112	12458	10246	11898	19761	16622	13139	9885	15277	14615	11155	4497	3972	7239	4926	7136	4387	5271	3471	8049	14060	17853	15268
PCHAS_0707800	251	266	438	359	231	126	93	86	130	64	39	191	168	3	154	247	211	88	206	240	2133	1929	2054	1474	1780	2956	2391	1911	1623	1992	1967	1314	316	352	527	803	941	702	1081	808	2120	2285	3598	3022
PCHAS_0707900	631	634	908	733	561	352	223	423	542	134	142	715	90	18	208	352	258	144	327	460	758	1174	879	1905	2737	2228	2617	2090	1345	3025	2035	1499	2407	1895	2942	5587	4978	2667	368	515	696	1088	803	834
PCHAS_0708000	6	3	6	6	7	1	2	1	6	1	1	5	2	0	2	2	4	2	2	1	41	31	28	15	39	39	79	45	37	84	117	71	18	29	23	63	92	49	73	46	62	46	86	35
PCHAS_0708100	1688	1877	2732	2433	1500	826	450	1063	1213	266	432	1831	1091	34	1114	2051	1740	678	1546	1608	3111	5105	5212	6630	7711	5309	4438	4194	3096	4576	3114	2173	2781	2712	3380	4747	5685	3350	2290	1549	4175	9676	4116	5963
PCHAS_0708200	278	306	451	436	193	98	42	58	77	45	30	62	35	0	62	197	147	54	226	241	449	731	474	904	1176	969	1059	792	567	933	442	511	94	175	165	196	265	113	52	34	86	393	337	466
PCHAS_0708300	677	964	386	160	95	121	29	68	138	39	133	891	495	153	976	2464	2005	1195	441	162	61	170	122	190	109	242	123	67	56	130	75	123	113	119	413	547	332	180	37	72	63	102	107	51
PCHAS_0708400	42	32	15	20	13	96	84	176	164	104	150	987	46	5	264	77	99	66	10	18	86	61	45	21	22	41	17	18	16	37	1244	78	1841	919	2673	3076	2375	1317	114	260	315	119	460	112
PCHAS_0708500	561	734	1127	926	599	354	315	368	545	194	161	295	57	9	161	331	272	89	452	551	1140	1083	852	1288	1657	2342	2418	1891	1281	2366	1691	1584	617	651	988	511	855	410	83	40	197	669	675	910
PCHAS_0708600	239	193	412	354	225	166	109	184	377	78	99	278	27	0	44	62	61	11	113	163	347	288	190	366	613	1075	1312	918	566	1519	1728	1034	690	599	1076	736	1053	465	64	66	109	148	285	201
PCHAS_0708800	17	13	9	8	6	7	3	0	4	2	3	21	4	2	17	30	42	22	7	3	8	24	11	28	32	52	17	15	8	19	9	9	27	20	47	47	58	51	6	4	4	7	21	6
PCHAS_0708900	120	101	106	93	92	180	132	259	347	157	144	516	36	5	74	22	29	16	27	57	78	71	33	56	90	227	612	377	168	1043	2073	844	1527	1084	1944	1281	1798	943	118	110	125	60	255	71
PCHAS_0709000	329	341	171	113	82	289	187	642	696	157	630	2864	232	69	574	749	583	365	139	91	117	176	115	187	114	192	198	141	74	434	1700	343	5431	3832	5817	4873	5487	3392	240	441	508	292	348	171
PCHAS_0709100	453	613	761	601	521	434	552	573	675	461	272	639	43	15	187	141	180	84	306	390	580	437	283	494	847	1519	1794	1365	887	1931	2570	1391	1250	959	1681	1372	1767	831	110	142	213	201	576	289
PCHAS_0709200	743	664	258	174	91	75	17	96	108	24	166	788	520	107	679	1842	1560	848	312	198	49	165	218	300	226	283	161	98	76	159	61	96	854	507	993	1556	1498	850	126	194	193	431	134	76
PCHAS_0709300	144	154	184	146	144	85	79	124	178	64	44	85	26	11	53	85	48	47	49	80	27	56	22	65	124	158	312	205	114	501	242	251	147	168	292	201	287	152	13	13	23	37	27	23
PCHAS_0709400	479	549	676	647	499	311	299	406	499	159	134	260	45	8	87	122	131	49	187	351	370	291	227	885	1516	1612	2075	1599	975	2852	2007	1405	1006	1134	1554	940	1555	637	74	77	126	219	224	248
PCHAS_0709500	451	518	649	594	455	308	267	487	630	184	160	512	216	9	293	407	344	124	259	416	785	1105	1032	1170	1266	1731	1735	1330	893	2331	1688	1158	1141	755	1551	1302	1784	861	560	398	927	1425	1061	1174
PCHAS_0709600	1091	1212	1533	1513	1059	682	517	1148	1336	273	396	1880	861	34	819	1289	917	387	754	984	2126	3048	3435	3986	4033	3789	3437	2994	1931	5216	3877	2265	3518	2709	4722	6991	7092	4862	2662	1728	4505	6155	3675	4309
PCHAS_0709700	9	6	1	2	0	1	0	0	1	0	2	6	3	0	5	12	7	6	7	2	4	10	9	12	5	11	3	4	1	6	1	0	13	7	8	27	19	6	1	2	4	11	11	1
PCHAS_0709800	55	33	30	22	5	8	0	5	9	2	10	59	23	3	46	73	83	40	20	18	25	74	45	79	84	75	28	29	21	34	8	26	71	74	100	144	154	90	15	21	29	62	29	17
PCHAS_0709900	15	11	9	6	8	11	13	31	28	11	11	33	0	1	12	13	10	5	8	7	16	10	8	10	17	22	22	30	10	50	97	32	100	113	121	84	111	89	21	36	26	11	23	8
PCHAS_0710000	91	94	71	62	77	125	150	257	285	108	111	383	22	3	67	30	36	24	13	53	71	66	62	52	48	154	475	349	94	857	1951	636	1205	852	1954	1156	1589	715	62	70	173	58	181	61
PCHAS_0710100	408	425	303	272	304	516	596	994	1190	555	522	2122	124	22	396	240	316	139	93	182	175	268	159	144	203	406	1113	656	280	1962	3764	1452	3856	2799	5090	4307	4796	2855	236	395	573	291	586	236
PCHAS_0710200	703	911	1304	1071	617	412	443	388	502	333	145	487	342	17	512	886	858	383	794	766	4398	3840	3169	2654	3105	5239	4076	3280	2427	3079	3316	2228	767	782	1300	1070	1423	811	1674	1042	2577	3555	5664	4341
PCHAS_0710300	5	7	6	11	5	2	8	1	4	3	0	2	2	0	7	8	0	2	1	6	13	14	11	9	30	15	15	27	11	35	19	14	4	10	9	8	15	10	1	5	6	25	19	20
PCHAS_0710400	347	365	664	576	349	205	156	196	349	117	76	243	116	7	137	281	161	49	240	284	1596	1679	1287	1138	1600	2746	2685	2118	1450	2672	2507	1727	550	662	1009	542	942	517	612	373	814	1308	2016	1596
PCHAS_0710500	450	603	689	677	505	246	229	348	436	129	107	256	121	10	209	310	309	120	291	417	695	1019	1186	1663	2005	2190	1950	1750	1086	2502	1495	1233	687	775	1185	838	1163	545	268	168	598	1448	928	1264
PCHAS_0710600	145	139	250	228	123	82	69	76	148	44	37	109	11	1	28	54	44	17	85	107	439	372	304	481	759	1102	1271	929	556	1414	1303	955	436	443	694	460	784	322	54	51	123	243	328	336
PCHAS_0710700	3	3	5	3	1	2	0	1	2	0	0	3	2	0	3	8	3	3	3	3	3	4	1	7	7	15	12	5	6	12	11	8	4	5	5	6	7	10	2	2	5	4	6	1
PCHAS_0710800	31	24	13	7	3	3	3	4	5	1	8	32	13	5	35	57	59	41	13	3	13	20	12	21	10	53	17	5	3	16	9	15	15	22	24	35	43	16	5	7	11	10	18	5
PCHAS_0710900	1629	1769	2477	2307	1413	706	429	925	1115	197	261	1991	1870	48	1359	2379	1728	730	1301	1531	3536	5691	6336	7598	6786	6513	4773	4270	3083	6134	3087	2845	1767	1855	2895	5422	6227	4969	3900	2188	6134	12612	6211	7575
PCHAS_0711000	126	81	305	240	100	49	41	48	88	21	18	108	70	1	68	152	86	38	116	113	1626	1597	1403	1055	1458	2013	1742	1387	1077	1357	1328	967	280	310	452	457	702	359	783	383	988	1671	2239	1738
PCHAS_0711100	33	18	43	30	27	13	8	13	12	4	6	9	5	3	7	10	11	3	8	11	24	26	31	74	82	51	80	55	48	88	68	65	36	33	48	102	134	41	8	6	20	33	28	16
PCHAS_0711200	940	914	1355	1258	862	648	431	881	1143	270	414	1370	206	14	410	650	455	197	551	738	1240	2137	1658	2390	3447	2733	2868	2513	1616	3689	3115	1827	3585	3615	4377	4418	5287	2778	653	686	1208	2539	1422	1882
PCHAS_0711300	701	713	1252	1030	575	303	198	270	377	110	146	1565	881	36	748	1221	823	338	634	682	2703	5426	4251	3939	4725	3474	3268	2776	2461	3065	1801	1587	2364	1676	2670	12347	9256	7522	3931	3884	6240	7245	3834	5129
PCHAS_0711400	175	161	283	205	129	114	91	148	233	72	97	290	53	3	71	127	71	31	101	115	838	844	794	698	969	1420	1616	1250	816	1711	2269	1171	1258	1104	1695	1186	1697	756	347	194	566	834	1028	833
PCHAS_0711500	2643	3150	4444	3756	2598	1726	1491	2274	2765	862	820	2009	763	38	1175	1893	1732	633	1947	2461	3644	5298	5155	7547	8782	9045	8988	7641	5021	10709	6973	5806	4771	4827	7155	5397	7907	3871	1602	1042	2846	6427	3702	5213
PCHAS_0711600	32	23	36	31	21	18	15	45	37	9	30	410	25	6	66	54	39	26	20	21	107	80	93	102	108	99	78	66	47	120	408	85	2556	1225	2107	6050	4619	2732	262	475	620	310	230	162
PCHAS_0711700	50	34	92	73	31	32	10	29	52	21	10	50	8	1	9	17	12	5	15	26	229	150	124	170	318	514	525	428	308	505	699	388	333	280	371	310	434	229	47	88	90	87	194	112
PCHAS_0711800	0	2	2	4	0	1	1	1	1	0	2	1	0	0	1	2	1	1	0	1	5	4	1	5	2	7	4	1	2	5	7	4	2	0	2	2	1	2	1	3	1	6	8	4
PCHAS_0711900	128	114	240	211	102	51	41	43	61	28	28	75	79	2	90	156	113	48	157	115	964	1079	691	608	770	995	837	662	529	650	667	443	165	159	248	176	287	176	343	195	435	875	1331	1006
PCHAS_0712000	42	33	24	23	21	47	23	123	127	25	120	1603	93	13	244	106	77	63	25	39	158	85	106	104	74	60	41	33	39	65	650	64	5450	2536	4801	10906	8328	4967	329	627	672	497	498	234
PCHAS_0712100	9	6	5	1	0	1	0	1	0	3	2	10	4	0	8	8	18	8	5	3	15	69	33	51	36	42	16	16	9	25	5	13	39	26	40	59	50	37	5	5	5	29	13	15
PCHAS_0712200	9	10	6	3	1	4	1	2	1	4	2	9	0	0	6	14	10	2	2	5	8	10	5	14	12	30	12	8	5	14	19	9	18	18	23	32	44	16	6	7	9	2	11	1
PCHAS_0712300	29	13	10	5	7	3	0	2	1	0	8	31	8	4	20	24	38	16	10	3	24	52	37	54	49	49	27	17	18	33	10	29	65	51	69	107	119	93	10	9	15	36	28	13
PCHAS_0712400	17	5	15	7	4	1	2	0	3	0	3	18	2	1	13	14	28	7	8	3	17	20	9	22	15	22	13	4	10	13	11	16	21	12	30	48	73	35	11	6	5	5	14	3
PCHAS_0712500	267	305	501	441	296	232	305	318	452	247	178	510	46	7	139	116	113	37	158	264	692	537	354	592	952	1728	1796	1413	875	1939	2899	1584	1329	1214	1995	1266	1591	796	114	130	203	254	679	457
PCHAS_0712600	509	623	824	755	441	297	295	281	311	227	89	195	63	11	177	345	335	133	345	471	1252	1332	1073	1247	1533	2438	2198	1786	1280	2114	1757	1343	370	399	683	443	597	294	163	75	295	990	1311	1159
PCHAS_0712700	270	317	504	407	256	198	146	241	351	84	120	406	112	6	175	295	224	83	209	232	1284	1186	1496	1524	1625	2114	2224	1710	1160	2448	2556	1562	1531	1699	2329	1650	2250	1100	502	375	1009	1653	1630	1715
PCHAS_0712800	12	9	12	8	6	3	3	8	13	1	10	132	26	4	43	43	28	16	9	8	21	30	26	16	24	44	49	38	27	32	84	34	237	78	366	920	555	319	20	47	40	32	77	35
PCHAS_0712900	269	301	493	395	279	184	176	231	341	111	90	230	15	7	73	95	84	30	177	239	352	255	150	482	720	1148	1211	960	625	1279	1247	906	496	413	810	467	667	327	33	35	64	107	221	233
PCHAS_0712950	21	28	14	18	10	7	15	18	11	24	5	23	10	0	17	31	29	18	20	21	16	80	27	26	38	81	23	27	33	18	22	100	10	19	55	28	25	51	70	26	122	79	78	47
PCHAS_0713000	53	44	20	17	9	22	13	15	14	8	37	1194	189	14	407	177	161	96	30	25	190	189	173	167	124	117	74	71	53	59	70	21	911	297	792	12507	7682	6943	947	1247	1524	616	714	326
PCHAS_0713100	588	534	911	787	498	371	265	456	701	176	259	1115	269	11	333	626	408	121	422	463	1922	1711	1957	1834	1749	2683	2250	1944	1322	2477	3584	1716	2167	1800	3200	2440	3030	1579	790	517	1759	2265	2546	2725
PCHAS_0713200	241	225	328	331	193	132	91	140	178	57	41	427	60	9	170	152	139	54	155	179	507	678	520	736	914	1096	1116	860	598	1356	1073	779	973	665	1532	3707	2556	1461	358	337	587	795	789	682
PCHAS_0713300	611	558	963	900	473	166	133	159	239	69	99	697	635	8	538	864	615	272	543	498	2047	4364	3041	3010	3903	2440	2415	2076	1607	1988	1084	1041	552	695	704	1782	2050	2074	3941	3166	5509	6480	2982	3892
PCHAS_0713400	2805	3049	4119	3719	2662	2078	1871	2654	3490	1604	1328	4595	808	46	1330	2145	1653	590	1952	2340	6925	5205	5011	5367	6446	11436	11409	8663	5834	12526	18320	8708	8169	6153	13952	12265	13202	6454	2081	1665	4542	5122	9920	6830
PCHAS_0713500	649	696	1064	868	588	302	230	313	462	149	114	288	160	9	252	477	410	132	455	560	1788	2791	2306	2841	3560	3538	3496	2870	2000	3925	2481	2026	876	1071	1565	1045	1771	826	573	474	1132	2691	1882	2473
PCHAS_0713600	2014	2230	3892	2900	2086	1038	767	1172	1639	432	394	789	279	34	536	1132	945	317	1504	1827	2586	4739	3889	7335	9311	8555	7730	6757	4660	8704	4107	4332	2479	2755	3767	2476	3825	1935	379	277	799	3643	1895	3298
PCHAS_0713700	26	23	21	16	20	11	9	27	15	14	29	742	79	5	198	64	73	36	13	20	118	50	93	47	52	52	57	44	32	54	355	44	1315	474	1769	6166	3748	2163	230	410	535	184	657	131
PCHAS_0713800	148	197	71	21	18	18	5	10	20	13	31	212	104	33	203	500	441	270	74	36	14	17	33	30	18	57	12	12	11	16	17	13	53	44	109	185	104	60	11	19	17	22	22	16
PCHAS_0713900	150	120	59	71	81	135	77	346	360	55	168	926	56	11	193	133	166	66	39	61	95	79	102	113	111	111	177	90	58	385	952	226	2802	1759	2658	4195	3971	1856	153	246	315	228	188	102
PCHAS_0714000	2571	3147	4143	3770	2583	1851	1764	2125	2780	1217	843	2893	791	49	1389	2004	1647	696	1788	2528	6124	8582	6101	5822	8229	10580	11022	8936	5732	11957	12318	7286	6184	6151	9629	6991	9328	5480	2984	2092	5212	8472	7932	7869
PCHAS_0714100	178	175	350	315	200	89	60	88	157	48	42	205	119	2	110	209	103	49	126	155	621	923	716	585	756	1122	1103	856	631	955	768	604	192	214	393	336	556	414	549	348	762	1035	982	976
PCHAS_0714200	218	271	351	315	208	140	164	171	236	96	85	278	138	7	235	261	204	88	161	240	844	1028	779	656	848	1255	1141	892	656	1153	1193	821	399	350	651	604	735	596	734	484	945	1132	1405	1071
PCHAS_0714300	170	172	275	201	148	107	94	126	200	59	69	171	90	7	115	175	132	72	108	158	366	569	388	383	531	716	689	533	353	805	656	506	406	425	636	526	740	426	406	284	413	507	585	470
PCHAS_0714400	308	386	560	444	332	191	152	141	219	111	60	90	22	7	54	119	92	42	170	263	583	360	263	694	1008	2014	2063	1620	947	2027	1708	1369	281	337	555	327	501	263	43	41	91	219	382	310
PCHAS_0714500	729	829	1277	1050	776	675	652	818	1141	531	373	981	77	11	250	325	292	86	504	663	1554	1281	887	1314	1869	3445	3376	2794	1685	3918	5585	2582	2380	1831	3612	2439	3442	1625	245	202	457	660	1488	914
PCHAS_0714600	74	69	116	82	57	59	37	76	111	25	33	199	24	2	39	81	59	24	32	43	204	112	86	166	274	482	596	392	312	600	1249	526	588	444	839	731	923	397	63	86	113	78	246	122
PCHAS_0714700	116	139	172	155	124	109	119	164	196	94	80	288	17	1	55	27	42	12	39	79	107	63	50	86	184	312	530	406	238	613	1038	438	623	545	977	726	773	405	36	63	100	36	169	67
PCHAS_0714800	13	10	6	5	5	2	1	1	2	3	4	17	8	2	13	25	27	10	7	1	23	30	16	26	19	51	25	20	12	21	13	17	30	34	48	56	59	38	8	9	8	24	43	6
PCHAS_0714900	539	466	206	142	85	292	140	694	664	97	534	2659	294	54	706	1162	997	550	185	146	116	129	119	187	114	100	77	73	40	206	1175	182	4870	3041	4544	5507	5692	2789	207	250	371	296	264	116
PCHAS_0715000	193	177	377	325	170	57	55	45	63	36	22	214	223	3	155	257	171	90	170	162	1046	972	1080	1064	1032	1345	1176	931	819	949	711	625	281	307	380	610	755	623	801	686	1764	1434	1410	1590
PCHAS_0715100	727	940	1124	1045	771	544	542	920	1084	285	337	1024	223	16	374	551	505	182	475	708	1436	2359	1967	2338	2923	2858	3166	2465	1654	4011	3305	2210	2954	2440	4179	3559	4681	2320	812	700	1796	2452	1598	2026
PCHAS_0715200	324	356	474	465	276	247	251	294	366	230	141	578	67	9	148	165	152	65	217	271	813	521	414	688	1123	1623	1809	1364	939	1804	2820	1289	1847	1638	2410	2188	2420	1252	183	368	408	356	851	533
PCHAS_0715300	442	541	761	656	413	287	294	351	459	208	116	333	177	10	266	500	404	169	395	412	1443	1722	1356	1050	1289	2014	1874	1423	1084	1852	1711	1300	558	540	901	728	979	498	727	376	1166	1550	2098	1849
PCHAS_0715400	193	266	352	291	181	107	140	142	229	107	54	167	56	2	108	195	146	55	161	186	581	723	554	550	637	1019	998	746	514	980	956	636	353	286	548	413	586	285	150	96	263	582	778	717
PCHAS_0715500	253	262	476	457	263	166	159	202	302	127	105	327	92	5	165	251	178	64	228	218	1131	996	929	940	1305	1682	1702	1170	979	1474	2093	1095	990	1007	1436	1767	1904	1017	326	352	716	925	1404	1425
PCHAS_0715600	243	309	521	440	259	105	75	68	75	65	19	70	32	4	56	177	135	38	192	252	395	340	458	814	983	1140	1010	848	561	883	516	421	100	87	215	146	183	75	20	11	64	306	309	359
PCHAS_0715700	446	459	615	559	407	351	295	463	634	178	185	442	53	8	110	147	117	46	129	298	432	544	387	801	1430	1417	2202	1740	938	3241	2521	1665	1646	1676	2440	1939	2943	1206	155	176	259	400	362	377
PCHAS_0715800	163	183	250	233	133	67	57	61	55	35	20	32	21	4	56	112	122	38	143	169	384	591	415	549	652	871	738	609	466	619	357	409	74	89	137	97	124	62	37	22	68	338	363	416
PCHAS_0715900	6	11	9	9	7	3	4	2	5	3	1	13	0	0	3	5	5	0	3	9	4	9	11	10	12	13	17	18	9	14	18	9	8	6	16	43	22	8	4	2	10	3	12	15
PCHAS_0716000	457	580	706	570	379	432	332	574	671	314	328	1125	151	31	391	715	622	329	414	369	1022	721	624	957	1131	1865	1801	1380	996	1825	3540	1280	2119	1676	3207	2210	2921	1379	184	192	374	478	1085	715
PCHAS_0716100	514	490	576	490	371	395	308	677	834	220	342	1255	168	28	291	499	408	182	217	290	830	600	670	1275	2045	3007	3948	3020	1710	5412	9059	3625	7738	6813	8779	7100	9202	4368	533	763	1096	735	1107	815
PCHAS_0716200	379	502	579	548	375	311	333	333	500	312	173	419	94	7	238	288	335	114	355	404	1253	1130	871	709	909	1880	1540	1215	926	1466	1990	1143	948	864	1219	762	1015	565	239	164	377	759	1363	1018
PCHAS_0716300	5	0	2	3	1	2	2	1	3	0	1	5	2	0	0	4	2	0	2	1	2	4	5	6	5	4	7	8	3	14	25	17	13	3	16	26	28	11	0	1	4	3	8	8
PCHAS_0716400	921	1346	570	211	147	169	46	90	203	68	207	1287	799	230	1319	3494	3092	1902	627	229	56	97	138	159	75	277	94	37	49	123	53	91	202	147	550	750	410	267	51	104	75	120	141	38
PCHAS_0716500	8	11	4	7	3	1	0	2	1	0	5	14	4	1	21	17	17	13	4	3	18	47	20	15	25	41	18	20	13	10	9	10	19	17	38	35	52	25	3	6	8	21	31	5
PCHAS_0716600	1671	2070	2667	2453	1625	1235	1140	1905	2343	772	875	2874	627	46	1038	1477	1230	513	1224	1634	2724	4184	3409	3840	5308	4756	5198	4193	2904	6019	5794	3244	5937	5177	7418	7023	8690	4529	1501	1125	2614	4960	3072	3989
PCHAS_0716700	1712	2295	2467	2391	1675	1420	1619	1835	2249	1384	732	2738	1895	53	2083	2062	2058	915	1535	1766	5860	6310	5394	4306	5057	8008	6277	5326	3822	6581	8985	4794	3863	3503	6318	6508	7854	5792	4137	3285	6205	7616	11295	8599
PCHAS_0716800	473	612	772	725	462	273	245	217	313	204	82	183	91	8	254	387	410	179	473	467	1218	1477	1003	1033	1323	1739	1673	1357	898	1534	1175	1100	254	330	383	282	460	220	341	141	444	1016	1437	1205
PCHAS_0716900	386	425	710	671	403	202	168	209	321	104	77	216	134	7	177	331	243	106	267	353	1321	1176	1348	1555	1783	2483	2139	1784	1283	2277	1920	1317	443	591	820	724	920	408	345	213	734	1426	1515	1636
PCHAS_0717000	111	74	26	52	46	29	27	96	66	34	209	7226	1054	115	2490	511	505	384	64	101	1525	1172	1213	566	495	254	199	201	202	111	473	111	6344	1837	5362	111923	70296	67429	10095	12420	14443	5698	5821	2654
PCHAS_0717100	290	302	491	449	264	202	189	223	341	121	115	413	132	3	175	267	212	80	183	270	1638	1491	1344	1117	1303	2268	2033	1614	1109	1956	2740	1364	1084	920	1678	1263	1776	858	782	507	1291	1497	2362	1753
PCHAS_0717200	2	3	0	1	1	5	4	7	5	4	2	9	1	0	0	2	1	2	1	0	4	5	1	0	3	1	5	3	1	5	46	5	16	20	24	41	58	23	14	7	17	6	7	6
PCHAS_0717300	2430	2877	3962	3708	2272	1421	1351	1405	1814	1034	502	2346	1778	60	1996	2952	2638	1033	2265	2511	11297	11755	10021	8456	10348	16294	12469	11173	7829	11390	12373	7798	3736	3799	6428	10113	9951	7519	8189	6091	13440	13429	18991	13993
PCHAS_0717400	51	52	36	38	22	13	22	17	52	14	15	72	40	9	68	108	127	66	30	34	135	238	131	121	129	163	84	85	73	73	83	69	82	66	109	118	170	82	45	53	90	136	224	117
PCHAS_0717500	23	19	9	18	8	4	2	6	23	3	7	35	15	3	24	38	44	26	14	7	53	145	73	67	54	75	22	20	25	16	25	27	54	36	58	77	105	50	16	10	44	58	95	36
PCHAS_0717600	318	373	477	436	289	237	226	222	307	176	109	230	88	5	163	239	206	82	199	316	1077	1124	828	720	917	1761	1565	1223	846	1419	1728	1019	526	482	853	534	716	416	465	222	604	944	1467	1091
PCHAS_0717700	108	134	227	202	117	58	59	64	89	29	25	68	21	1	28	86	75	31	93	119	647	620	524	646	952	1257	1155	866	675	1017	980	632	308	307	420	311	527	239	217	136	240	452	663	588
PCHAS_0717750	96	63	192	133	76	40	48	35	71	15	27	52	16	1	22	45	21	8	58	83	237	255	196	290	369	524	532	402	288	503	432	309	131	136	208	149	213	91	22	17	56	129	233	203
PCHAS_0717800	148	236	277	253	183	119	107	60	129	68	29	63	14	2	63	117	99	27	127	163	712	687	535	587	792	1220	1377	937	701	1122	1120	771	212	260	340	250	423	186	98	48	167	408	695	629
PCHAS_0717900	484	579	911	774	473	270	233	275	400	160	86	213	49	6	103	247	214	64	330	447	825	1002	722	1312	1841	2142	2337	1799	1062	2443	1533	1390	462	509	861	578	825	392	123	64	228	686	547	696
PCHAS_0718000	235	292	388	362	232	131	121	99	138	117	34	70	12	8	58	115	106	63	147	257	584	602	373	487	746	1323	1185	927	635	1144	992	771	152	189	298	178	254	134	88	29	129	283	467	378
PCHAS_0718100	869	1158	1172	1150	826	777	885	1104	1405	912	589	1682	225	37	588	771	759	335	586	779	1865	1841	1374	1408	1790	3492	3260	2403	1713	3583	6255	2675	3481	2504	5157	3305	4158	1989	510	412	765	1212	2319	1665
PCHAS_0718200	4458	5012	7950	6763	4269	2548	2016	2431	3459	1721	1096	3421	2035	71	2711	4506	3527	1290	4342	4413	18103	22122	15239	12392	14927	23267	19239	15049	11728	17027	17739	12239	5007	4546	8645	6491	9105	5532	9115	4572	11470	19778	22922	19872
PCHAS_0718300	259	269	489	404	237	155	101	135	254	54	62	226	86	3	119	225	151	66	166	196	708	1272	997	969	1370	1365	1430	1127	741	1531	976	841	407	464	718	652	848	454	474	329	808	1377	871	1029
PCHAS_0718400	93	45	190	151	76	36	10	28	45	8	9	90	72	3	42	97	39	11	53	66	858	887	838	538	620	1080	931	761	544	727	567	452	87	92	175	303	334	295	710	495	1024	932	1474	1059
PCHAS_0718500	899	1224	1400	1225	811	677	785	913	1038	661	506	3891	1182	75	1837	1171	1209	594	799	959	4497	3878	3425	2354	2592	4808	4072	3018	2410	3602	6507	2909	4060	2547	6121	21432	14876	11843	4979	4585	7755	5043	9998	5256
PCHAS_0718600	615	770	1043	913	568	298	307	300	446	207	139	683	386	17	494	839	654	272	594	581	2092	2734	2230	2004	2254	2626	2498	1886	1424	2386	1804	1407	627	658	1068	1919	1933	1316	1610	1010	2899	3175	3044	2963
PCHAS_0718700	255	174	455	361	166	111	61	114	189	46	78	331	133	3	117	248	161	53	214	200	899	1259	818	751	903	984	1142	762	621	1052	759	650	500	345	729	1070	1031	629	535	335	976	1223	889	1039
PCHAS_0718800	442	459	515	501	389	364	354	550	718	209	246	907	104	14	219	221	244	125	149	310	469	240	234	685	974	1474	1853	1351	811	2862	3503	1485	2504	1789	3891	4551	4124	2145	236	314	593	324	623	420
PCHAS_0718900	141	125	141	124	89	205	145	346	395	169	281	1645	51	8	238	88	103	48	54	88	453	230	226	265	430	616	694	596	318	892	5107	781	7988	5600	9244	9604	9537	5239	644	1117	1475	443	1133	410
PCHAS_0719000	572	822	938	901	603	433	445	485	618	266	188	521	63	9	213	324	339	129	419	596	1213	853	877	1468	1781	2401	2654	2038	1332	2877	2861	1623	1199	1172	1866	1567	2224	945	154	159	425	823	1040	1028
PCHAS_0719100	469	480	741	651	494	379	346	452	558	204	164	379	40	5	116	182	156	66	204	405	806	645	547	1022	1599	2108	2805	2135	1329	3486	2828	1888	1041	1033	1774	1117	1926	815	110	121	269	520	696	702
PCHAS_0719200	1051	1196	1924	1668	1000	492	430	466	653	288	168	618	441	28	593	1207	962	368	1027	974	2523	3265	2840	3255	3891	3838	3634	3116	2214	3502	2106	1947	926	918	1302	1741	2014	1119	721	553	1339	3618	2754	3429
PCHAS_0719300	25	13	6	1	4	4	4	10	4	5	8	73	8	1	35	32	62	28	15	4	21	22	28	19	19	47	26	19	11	32	147	18	382	223	460	765	638	417	46	97	136	47	110	31
PCHAS_0719400	280	380	484	421	271	195	194	252	356	134	136	498	197	9	258	366	279	148	210	276	1503	1303	1559	1164	1391	2065	1992	1540	1180	2019	2486	1345	1311	1054	1776	2894	2834	1477	1189	898	2036	1881	2716	2021
PCHAS_0719500	226	256	418	378	232	121	108	97	111	67	20	78	17	2	43	84	59	18	141	195	685	349	284	669	1218	1870	2007	1656	1067	1860	1502	1140	210	334	389	288	468	213	76	74	123	223	415	323
PCHAS_0719600	770	863	1302	1220	713	467	433	536	759	280	243	1598	910	28	873	1189	984	424	738	872	9147	8134	8636	6608	7742	10817	8310	7061	5570	7358	9101	4686	4460	3909	6433	9220	10503	7120	6171	4172	11375	11922	15592	11506
PCHAS_0719700	739	671	1360	1140	751	421	246	342	595	163	150	375	151	5	234	477	310	98	459	671	1466	1877	1793	2169	2898	3976	4008	3216	2044	4651	3114	2482	796	963	1574	821	1337	622	352	241	709	1906	1671	2055
PCHAS_0719800	259	233	409	371	236	106	91	115	155	65	37	96	37	1	74	181	111	45	148	214	466	689	461	629	837	1194	1219	913	633	1128	798	750	189	232	375	214	346	166	81	39	164	369	450	496
PCHAS_0719900	1658	2080	2578	2383	1652	1048	920	1231	1499	574	379	847	185	29	517	1003	929	348	1084	1516	2141	2590	2709	4575	5636	6288	5668	5080	3257	7028	4735	3649	1909	2262	3460	2204	3527	1427	344	260	805	2683	1773	2831
PCHAS_0720000	526	560	893	799	507	301	239	283	369	229	128	197	114	9	201	413	294	110	431	478	1383	1451	981	957	1438	2192	2193	1630	1170	2019	1973	1456	469	514	800	453	762	346	348	161	394	897	1444	1085
PCHAS_0720100	49	30	15	21	10	6	3	4	8	5	9	46	26	5	48	64	83	29	17	9	54	226	166	146	156	116	60	58	27	65	27	48	128	121	148	253	307	185	42	75	77	193	124	59
PCHAS_0720200	74	45	123	103	63	51	24	40	91	16	33	154	17	0	17	25	13	7	28	27	257	175	166	266	424	549	718	502	376	804	1160	560	758	621	1060	850	1061	480	61	90	160	126	240	196
PCHAS_0720300	2042	2855	2829	2611	1697	1204	1337	1381	1777	1001	709	3817	2532	148	2768	3646	3536	1767	2041	1971	10403	9685	8308	6110	7099	10134	8528	7263	5283	7777	10319	5615	3612	3652	6137	11304	11652	10175	13751	9801	24000	14709	21142	13367
PCHAS_0720400	19	17	21	13	6	5	4	1	6	1	2	23	6	5	15	32	34	12	9	8	27	43	33	40	25	41	42	24	13	19	25	15	8	18	21	35	23	15	12	12	9	18	42	12
PCHAS_0720500	5	4	5	0	0	1	0	1	1	1	0	3	1	0	0	1	0	0	0	3	2	4	3	4	7	13	4	8	4	5	15	5	0	4	7	4	8	2	2	0	1	1	2	3
PCHAS_0720600	195	186	333	245	169	66	53	34	74	37	14	39	14	1	29	88	50	30	131	170	513	552	492	737	1292	1345	1478	1170	754	1253	707	690	131	219	228	184	317	139	50	37	103	343	351	386
PCHAS_0720700	12	24	27	24	14	7	13	2	11	9	0	8	3	1	5	11	8	2	9	21	48	28	21	21	31	91	84	70	52	59	54	39	7	7	17	16	30	10	7	3	18	13	36	19
PCHAS_0720800	153	96	267	239	127	44	27	35	74	20	16	191	124	0	57	159	87	23	65	117	1134	1192	1119	854	982	1603	1299	1060	731	1010	1031	693	182	210	294	635	768	684	982	625	1714	1589	2045	1682
PCHAS_0720900	1218	1636	1948	1795	1218	838	788	944	1168	492	327	1080	501	37	759	1158	965	439	939	1254	2648	4851	3145	3471	5095	4349	4689	3891	2854	5199	3395	2603	2219	2563	3012	2647	3645	2457	2033	1699	3039	5349	2792	3790
PCHAS_0721000	21357	29784	36936	31779	21926	13827	14907	14706	17397	11733	5434	13325	10983	530	18062	23399	23797	8855	19821	23226	70067	109727	79506	67164	91962	123403	98413	89790	63051	84776	87717	58518	29860	36119	46484	28141	40818	24629	32530	23242	67476	115538	97137	110396
PCHAS_0721100	220	155	518	408	178	91	42	63	161	22	52	428	302	3	105	294	129	43	133	169	2167	2656	2282	1810	1893	2996	2547	1992	1531	2062	1708	1483	438	478	714	1431	1632	1473	2320	1447	3147	3281	3727	3206
PCHAS_0721200	921	1181	1189	1209	821	915	776	1497	1869	564	800	2833	348	37	807	876	806	318	610	904	1343	1953	1710	2026	2651	2565	2544	2249	1456	3460	4273	1955	6162	4979	7649	5490	6859	3590	761	755	1415	2466	1724	2197
PCHAS_0721300	867	1587	466	180	153	144	46	104	177	110	175	1129	572	255	1534	3274	3401	2213	609	263	89	106	158	225	71	340	132	90	71	186	131	144	141	147	534	777	404	212	81	93	112	139	230	70
PCHAS_0721400	940	954	1564	1461	795	534	390	549	772	286	247	1473	682	29	821	1053	864	327	731	868	4506	4851	4545	3878	4005	6335	5230	4048	3190	4757	4767	3176	1964	1639	3330	8744	6299	4694	3117	2507	5709	5885	6764	6174
PCHAS_0721500	124	124	206	216	110	57	59	57	116	49	41	181	165	5	111	174	150	66	120	113	1050	1106	879	580	667	1069	1081	812	649	801	796	574	215	213	307	733	688	553	1158	680	1105	1217	1801	1138
PCHAS_0721600	2	0	2	5	0	1	1	3	2	0	1	11	0	0	2	1	1	0	1	2	1	3	5	1	5	10	4	6	2	9	28	5	16	14	21	40	26	15	6	10	11	0	15	6
PCHAS_0721700	11046	14944	17988	15951	11652	9684	10103	12673	14388	7774	4784	11101	1844	238	4811	6373	6631	2251	8162	11227	22421	27822	18521	23334	34485	53590	48256	41509	25480	50343	71900	35302	29057	26196	47473	28160	39199	19897	3913	2670	6746	16762	24431	21638
PCHAS_0721800	21	17	20	17	11	21	6	17	27	11	15	248	37	1	55	33	26	14	5	7	62	44	51	42	45	85	102	70	46	101	176	75	270	146	303	2830	1721	1486	219	371	377	131	321	76
PCHAS_0721900	954	1301	1477	1323	892	500	486	405	637	277	145	827	751	37	822	1159	1046	474	712	1006	1687	2671	1893	1805	2176	2495	2202	1783	1396	2178	1652	1220	486	606	820	1024	1285	1277	1185	867	1944	3577	2630	2515
PCHAS_0722000	1779	2948	2332	2096	1198	700	514	409	579	504	352	3547	3197	265	3574	5648	5185	3018	2088	1630	10678	11349	8446	5217	5587	7910	5817	4352	4044	3367	3769	2588	736	747	1289	7099	6202	6609	10210	5466	12514	13478	20760	14043
PCHAS_0722100	513	697	688	713	560	545	576	693	788	569	280	890	65	13	276	265	281	123	279	493	1095	718	586	803	1096	2546	2528	1739	1160	2842	4463	1975	1780	1299	3062	2639	2766	1486	192	201	419	414	1190	758
PCHAS_0722200	63	53	15	39	27	49	51	186	108	70	147	3413	308	37	1000	202	236	119	34	50	701	306	395	209	155	115	85	79	76	68	1791	74	13500	5054	14019	47411	33987	23131	1956	3258	4183	1755	2545	872
PCHAS_0722300	30	47	17	6	22	17	9	46	29	16	28	1048	100	12	316	134	136	69	27	24	94	76	90	44	26	46	27	21	14	22	176	17	952	310	1416	6965	3776	2302	189	396	454	192	458	128
PCHAS_0722400	1781	2466	3191	2691	1924	1256	1441	1304	1667	1126	476	932	479	28	943	1416	1339	515	1770	1944	5422	6782	4208	4111	5527	8091	7448	6059	4276	7031	5935	5060	2023	2086	2957	2214	3084	1585	1589	832	2194	4812	6034	4831
PCHAS_0722500	98	135	181	177	97	66	57	50	74	40	14	67	32	1	55	107	83	23	54	108	600	586	476	478	703	944	828	746	456	814	815	523	147	218	329	286	326	192	148	83	220	450	728	611
PCHAS_0722600	286	297	495	339	235	135	145	202	227	90	66	218	326	11	262	550	555	176	388	345	1600	1922	1515	1741	2140	1862	1427	1272	898	1238	987	648	674	646	738	1967	1763	1118	1113	507	1857	2581	2147	1913
PCHAS_0722700	297	402	433	427	294	198	233	267	354	124	120	813	311	16	329	386	345	192	243	294	1565	1454	1701	1220	1256	2104	1649	1399	947	1754	2538	1083	1328	891	2144	4214	3495	2225	1165	913	2146	2137	3092	2118
PCHAS_0722800	308	317	661	515	270	120	57	66	115	55	32	87	46	4	90	275	226	77	330	333	1140	1062	971	1526	1554	1955	1474	1297	994	1033	635	588	170	152	262	162	272	150	63	44	202	797	862	1055
PCHAS_0722900	196	179	333	277	190	133	121	186	183	97	58	146	17	0	41	20	31	8	53	117	166	82	58	278	435	939	1513	907	514	1942	1672	1106	431	387	765	591	786	295	41	36	68	60	207	77
PCHAS_0723000	26	23	16	7	4	3	2	4	12	12	7	70	16	8	43	76	68	41	21	6	32	65	37	58	44	91	31	16	19	23	49	23	92	60	153	228	184	110	12	13	18	29	51	25
PCHAS_0723100	657	1197	578	320	226	181	131	137	246	129	157	733	444	180	1042	2396	2612	1633	580	345	547	697	448	524	674	1038	673	651	510	578	693	507	241	275	585	538	409	213	154	119	167	433	651	566
PCHAS_0723200	180	190	344	266	142	81	70	63	95	57	20	69	47	2	73	148	106	39	144	139	905	811	605	592	737	1353	1116	875	662	955	1029	621	159	203	292	232	354	148	173	81	292	570	1140	765
PCHAS_0723300	1362	1506	2216	1946	1267	711	581	841	1054	371	263	570	283	21	513	1117	920	335	1043	1262	1899	3075	2598	3602	4557	4265	4352	3609	2296	4732	2534	2356	1306	1675	1993	1354	2263	993	388	237	767	2955	1722	2570
PCHAS_0723400	110	272	82	32	21	19	12	25	36	19	23	161	107	37	242	529	576	342	96	24	9	28	20	36	15	30	10	7	6	16	8	16	19	24	71	99	60	25	11	15	17	16	29	16
PCHAS_0723500	303	382	444	415	301	263	247	315	501	200	185	437	47	12	131	159	168	64	137	207	367	306	200	374	799	1132	1574	1122	684	1864	2370	1280	1038	954	1617	1164	1642	705	125	127	160	175	331	196
PCHAS_0723600	51	33	25	15	14	6	12	9	26	5	10	56	13	1	40	57	69	29	12	19	18	44	25	59	58	55	43	49	22	49	56	33	68	57	97	127	146	81	14	12	24	32	19	16
PCHAS_0723700	177	254	195	114	72	78	55	100	123	55	91	475	127	30	274	532	479	257	148	90	282	286	196	194	248	424	309	266	201	323	721	267	676	368	998	1157	1006	514	136	135	195	251	453	278
PCHAS_0723800	155	187	329	276	171	100	97	58	74	75	21	82	55	1	96	171	118	47	151	162	521	419	363	377	458	740	658	559	332	601	574	437	90	118	185	169	262	160	141	91	203	389	629	500
PCHAS_0723900	268	245	434	375	193	85	64	73	90	63	29	282	271	9	306	406	323	109	277	232	1251	1512	1213	862	1061	1229	1039	843	646	803	576	557	118	180	233	593	698	634	1174	782	1664	1927	1945	1726
PCHAS_0724000	5	7	3	5	5	3	3	6	4	2	7	14	5	0	3	13	2	3	1	7	10	19	13	13	8	18	13	15	3	20	35	13	16	21	26	41	56	29	7	4	21	21	22	11
PCHAS_0724100	998	1110	1498	1357	843	570	376	909	1004	214	414	1985	833	36	1028	1519	1160	499	912	1045	2201	5582	3605	3922	5044	2982	2845	2512	1868	2996	2414	1516	5416	4351	5238	7100	7432	5092	2639	2173	4336	7821	2918	4510
PCHAS_0724200	140	139	219	155	153	119	110	149	235	87	81	212	22	2	58	86	66	25	71	109	442	349	314	400	617	1034	1038	862	541	1066	1588	816	720	713	1187	725	958	473	120	98	183	210	470	371
PCHAS_0724300	2328	3178	4090	3535	2506	1448	1391	1387	1783	959	516	1625	1114	55	1739	2519	2380	964	2271	2767	5297	9404	6163	5276	6967	8548	7854	6749	4509	6978	5079	4882	2756	2944	3366	2809	4010	2704	4121	2424	5495	8888	6815	7740
PCHAS_0724400	31	33	14	21	32	109	79	252	275	89	172	773	41	2	115	32	50	14	12	25	92	110	66	66	90	59	105	93	48	222	1337	222	2344	1941	2742	2055	2432	1308	146	228	342	187	264	110
PCHAS_0724500	562	575	1145	796	523	424	350	569	804	318	303	875	68	14	194	262	226	74	352	439	1228	815	667	1161	1709	3006	3107	2357	1545	3251	4542	2344	2236	1613	3678	2198	2876	1382	155	111	308	430	1045	670
PCHAS_0724600	405	427	897	686	429	283	212	313	445	225	168	1138	117	17	262	326	225	68	399	393	1409	1471	1037	1289	1587	2219	2287	1740	1147	2234	2860	1496	2051	1188	3257	7451	4873	2675	363	430	722	1008	1778	1162
PCHAS_0724700	2704	3761	4235	3642	2976	2567	2764	3322	4155	2059	1345	3041	332	58	1062	1121	1194	373	1662	2501	2899	3150	2253	3703	5382	8520	9705	7526	4544	12289	11974	7938	6713	5815	10639	6475	9055	4362	522	436	882	1969	2770	2472
PCHAS_0724800	376	391	577	549	405	338	242	334	489	180	158	684	42	10	117	164	153	53	172	301	812	453	339	902	1429	2445	2619	1947	1127	2804	4094	1790	1737	1413	2640	2409	2712	1321	192	207	350	304	790	467
PCHAS_0724900	173	123	257	222	120	130	84	142	276	67	73	302	24	1	46	40	28	7	43	92	274	161	136	333	530	1066	1294	917	576	1635	2380	1156	1056	788	1772	1095	1407	639	81	78	153	91	284	166
PCHAS_0725000	913	841	1778	1265	866	503	401	580	771	237	216	454	72	3	160	323	266	95	514	675	712	731	615	1769	2707	2831	3178	2710	1682	3492	1979	1711	1126	1227	1681	1124	1723	741	104	99	181	448	376	636
PCHAS_0725100	766	783	619	590	655	960	772	2087	2350	483	876	2641	185	35	525	366	377	150	149	313	208	393	222	389	525	601	1382	924	400	3074	3176	1542	6847	5201	7161	5908	7712	3912	225	305	451	463	367	248
PCHAS_0725200	200	186	402	338	196	85	48	70	97	27	42	73	39	1	51	134	107	32	149	194	682	800	790	1261	1838	1628	1700	1409	978	1611	1045	858	298	489	481	403	599	289	118	73	258	718	590	817
PCHAS_0725300	9	7	3	5	4	37	21	66	68	37	43	240	9	1	33	18	17	7	2	5	29	20	12	15	9	20	14	8	4	36	641	47	711	452	1003	820	833	426	50	81	107	30	123	33
PCHAS_0725400	172	174	277	275	155	141	111	178	274	134	107	346	47	2	121	173	130	49	126	193	645	614	474	400	637	979	811	673	481	797	1375	595	797	576	1155	740	951	426	131	123	222	476	848	612
PCHAS_0725500	6	3	7	2	1	3	1	2	11	1	2	21	1	0	0	4	5	1	2	7	14	11	9	18	15	14	11	10	10	19	41	12	18	15	28	25	27	20	4	5	6	10	20	10
PCHAS_0725600	130	141	96	84	71	51	55	39	55	48	32	94	46	4	80	101	144	58	46	57	110	251	170	124	150	250	210	150	81	216	206	178	171	124	192	362	334	194	44	17	85	119	298	64
PCHAS_0725700	108	121	114	83	75	115	134	217	305	123	125	609	66	14	155	116	139	85	38	54	97	122	84	96	124	193	259	190	75	471	969	357	1084	657	1453	1890	1601	827	108	184	222	112	279	119
PCHAS_0725800	298	277	599	459	257	170	119	183	294	65	98	328	51	6	91	163	122	59	182	229	581	765	638	1109	1298	1617	1580	1269	953	1959	1305	1070	888	644	1293	1037	1224	517	65	79	164	451	447	592
PCHAS_0725900	0	0	1	0	1	0	0	0	1	0	0	2	0	0	1	1	2	0	0	1	2	1	0	0	2	0	0	0	0	2	0	2	1	1	3	24	13	10	10	3	7	1	9	2
PCHAS_0726000	47	40	37	31	22	20	8	44	38	25	67	1709	235	17	679	125	144	116	26	32	271	170	167	70	91	88	153	98	69	150	303	102	880	291	1233	10641	5665	4296	689	1010	1099	331	1696	320
PCHAS_0726100	608	735	1327	1049	621	332	312	302	394	218	102	246	119	9	235	541	402	140	621	662	3288	3209	2492	2819	3552	5913	4682	3922	2709	3908	3559	2460	631	757	1221	680	1160	550	385	192	742	2174	3376	2832
PCHAS_0726200	76	71	156	137	68	33	37	22	18	16	8	30	20	0	25	84	64	24	75	104	384	530	492	474	504	633	518	412	381	394	305	290	55	71	106	76	116	63	57	31	132	426	420	483
PCHAS_0726300	303	300	242	233	256	431	339	815	940	200	418	1426	64	7	266	130	145	66	47	140	97	144	83	142	211	260	687	445	191	1443	1761	838	2974	2468	3805	3111	4192	1979	143	181	311	202	201	123
PCHAS_0726400	1228	1642	1884	1789	1124	767	792	876	1384	466	417	1249	367	26	788	1207	1116	446	1013	1158	1862	2971	2148	2560	3667	2850	2978	2569	1810	3278	2743	1740	2224	2136	3142	2259	3173	1690	730	529	1347	3526	1856	2409
PCHAS_0726500	413	568	711	614	431	329	370	377	489	260	143	363	165	6	245	357	334	133	333	405	2031	2409	1867	1659	2298	3433	3424	2547	1716	3366	3530	2157	1417	1182	2016	1405	2113	1015	983	480	1323	2198	2648	2216
PCHAS_0726600	538	710	906	816	551	399	456	485	655	334	170	593	362	14	455	652	510	211	453	581	1674	1999	1583	1207	1415	2263	2060	1593	1172	1958	2121	1419	830	664	1226	941	1133	739	1085	824	1619	2110	2816	2114
PCHAS_0726700	76	76	168	135	72	16	16	6	16	16	2	25	4	2	23	80	47	24	70	83	394	412	290	342	476	730	568	465	357	301	186	224	15	24	34	54	59	37	25	17	58	200	307	271
PCHAS_0726800	200	196	259	240	153	193	168	259	348	135	134	392	21	1	71	89	97	23	93	140	337	283	238	414	632	985	1069	783	580	1357	1978	927	1100	1010	1681	1219	1562	787	76	100	158	208	365	303
PCHAS_0726900	8785	12112	15324	13071	8625	5257	5642	5469	6635	4116	2047	5786	4180	194	6804	9535	9811	3710	9682	9885	18934	33710	22816	20475	23730	30036	26323	21272	15734	22773	16309	15620	6900	6728	9773	8402	12188	7697	9143	6275	14577	30900	23180	26510
PCHAS_0727000	574	826	838	828	576	481	551	539	705	409	212	674	108	11	367	468	475	190	501	588	1330	749	870	964	1179	2145	2104	1783	1150	2182	3308	1671	1277	1220	2254	1946	2118	1004	280	265	694	827	1561	1236
PCHAS_0727100	16	19	22	19	6	4	1	1	2	3	1	6	3	0	1	13	12	3	14	10	36	55	47	65	68	70	51	43	37	62	43	37	14	15	28	25	30	7	14	3	15	42	68	63
PCHAS_0727200	236	237	495	426	223	104	74	83	146	51	41	96	38	3	74	183	125	45	198	216	587	751	643	818	911	1113	1197	910	674	1101	699	640	149	191	341	247	363	154	98	47	211	605	526	670
PCHAS_0727300	118	169	208	210	85	69	67	60	86	72	38	167	50	1	89	130	111	39	103	140	563	606	440	371	444	698	701	496	426	483	453	358	162	168	292	453	381	241	204	155	337	452	646	639
PCHAS_0727400	208	254	147	170	202	319	277	485	582	214	159	358	25	2	71	39	59	19	41	84	65	58	32	64	112	182	616	383	135	1639	1643	844	845	769	1373	912	1480	668	63	80	123	66	122	64
PCHAS_0727500	1171	1376	1254	1179	1212	1272	1192	2149	2507	742	812	2165	157	35	487	271	281	129	277	710	330	322	194	489	1215	1439	3002	2253	1102	5726	4621	3038	5242	5463	6727	5515	8049	3895	365	494	663	446	462	287
PCHAS_0727600	122	175	206	201	160	110	93	111	148	76	34	110	27	5	45	100	101	30	76	129	775	738	672	719	1215	2243	2079	1685	1198	2216	2275	1331	904	910	986	689	1186	437	259	218	384	575	1033	673
PCHAS_0727700	159	181	225	178	110	84	94	68	110	65	21	61	9	4	20	52	66	23	74	111	295	197	178	348	507	952	1109	752	541	1152	971	721	219	192	318	216	326	126	39	30	60	142	216	181
PCHAS_0727800	204	201	388	317	185	156	118	187	308	101	96	317	70	3	87	142	90	37	134	171	692	680	460	608	828	1513	1289	1075	781	1381	2099	961	964	685	1340	1041	1282	672	174	175	338	485	837	603
PCHAS_0727900	1401	1793	2386	1998	1396	1100	1244	1301	1638	1160	671	2317	542	49	1163	1332	1361	523	1293	1511	5398	4947	3717	3515	4691	7899	6612	5547	3749	5949	9164	4390	6045	5008	8286	9216	8676	5149	1928	1397	2737	4243	6998	4737
PCHAS_0728000	443	484	768	685	473	254	161	277	416	72	92	231	47	5	89	198	158	72	258	377	396	392	402	963	1275	1298	1483	1209	823	2038	1046	907	565	582	899	603	920	352	62	51	107	359	281	434
PCHAS_0728100	152	145	109	47	43	39	24	49	68	39	37	228	109	23	186	353	311	214	75	47	181	237	142	295	155	577	205	164	92	260	150	243	187	232	450	398	337	214	33	53	58	77	240	81
PCHAS_0728200	5	7	3	5	0	5	6	9	16	2	5	9	5	2	2	11	5	7	1	6	5	8	1	3	3	7	10	2	3	20	32	18	9	20	14	32	32	19	6	13	14	3	6	3
PCHAS_0728300	608	629	598	526	647	758	797	1166	1531	627	349	773	91	10	193	84	103	36	100	280	322	332	201	256	501	1197	3242	2138	882	5757	7520	4127	2552	2980	4305	2617	4267	1816	200	338	515	301	865	253
PCHAS_0728400	421	448	730	575	373	208	153	156	227	98	65	318	236	7	271	464	329	138	348	378	1775	2129	1756	1726	2038	2861	2430	1935	1494	2063	1650	1285	467	528	727	1372	1318	933	896	645	1608	2155	2418	2338
PCHAS_0728500	398	451	675	536	356	166	110	182	163	42	74	647	374	12	393	620	507	225	376	413	1610	3319	2834	3066	4108	2538	1996	1750	1295	1747	1084	886	1671	1284	1584	7664	5985	4975	1958	1706	3927	6602	2406	3316
PCHAS_0728600	755	848	1420	1150	708	314	303	228	296	236	98	292	187	10	325	678	515	192	799	706	2427	2174	1584	1641	2324	3259	2739	2340	1691	2208	1856	1454	389	462	611	591	740	397	427	294	743	1720	2507	1953
PCHAS_0728700	136	82	38	35	12	10	5	5	11	8	21	134	58	13	131	175	254	108	45	32	60	133	104	108	72	137	55	32	28	44	12	44	126	117	168	190	248	148	18	24	26	79	65	28
PCHAS_0728800	38	46	18	8	10	5	1	5	10	2	7	45	16	8	50	118	102	55	24	10	34	48	28	49	30	67	34	16	13	28	11	31	39	18	53	45	41	33	3	9	11	19	28	10
PCHAS_0728900	193	226	374	331	210	142	94	173	281	57	86	291	62	6	132	198	135	60	142	188	266	449	414	437	555	584	699	562	351	790	482	498	511	384	709	533	683	365	90	58	147	406	289	417
PCHAS_0729000	65	78	60	61	35	15	23	35	52	22	22	75	34	7	56	128	151	62	38	48	71	228	112	134	166	200	115	71	72	153	86	84	135	90	199	234	267	163	25	24	36	88	83	71
PCHAS_0729100	72	74	63	62	37	13	4	13	8	6	12	65	25	4	57	86	97	43	40	61	63	252	147	205	244	187	112	102	69	124	69	69	149	132	141	306	337	213	43	55	112	249	133	81
PCHAS_0729200	554	664	1015	868	528	255	198	279	341	130	110	456	459	7	482	789	650	263	544	631	2854	3978	3309	3077	3827	4023	3425	3059	2162	3190	2122	1666	575	848	953	1325	1646	1334	2037	1693	3735	5046	3845	4150
PCHAS_0729300	1093	1383	1965	1682	1152	597	537	470	642	327	166	609	529	21	724	1146	1097	458	1099	1190	3703	5472	4655	3880	5297	6781	5748	5108	3562	5333	3575	3475	847	1111	1532	1499	2099	1443	2613	1452	3806	5748	4530	5214
PCHAS_0729400	4170	4358	5446	4965	3310	2926	2462	5527	5561	1599	2192	10314	3343	140	4106	4667	3846	1570	2980	3701	9321	19615	12583	11962	16445	12519	12306	10230	7036	14682	13346	8156	17959	17725	19882	36947	35838	29355	14133	13424	23042	27629	13597	15889
PCHAS_0729500	128	139	261	211	117	53	51	62	114	58	37	69	12	3	36	64	60	12	106	88	367	308	206	327	488	784	798	609	388	824	773	551	189	194	323	187	297	116	56	25	58	144	265	191
PCHAS_0729600	623	924	1039	893	677	358	433	339	409	327	101	212	93	13	261	494	458	203	599	669	1569	2042	1189	1174	1860	2508	2453	2060	1306	2149	2067	1406	324	440	639	555	689	368	429	198	509	1298	1631	1350
PCHAS_0729700	24	14	11	11	16	10	8	7	12	4	13	577	60	8	132	45	40	26	11	12	81	83	64	50	61	41	39	33	32	33	53	27	327	111	294	5916	2828	2826	395	537	640	197	264	116
PCHAS_0729800	408	508	640	578	370	192	185	138	213	101	60	542	417	14	501	611	528	247	431	438	1269	2102	1572	1289	1501	1543	1518	1244	1019	1374	860	800	305	342	447	1666	1404	1444	1433	1083	2248	2718	1992	2096
PCHAS_0729900	266	517	165	83	46	55	25	37	63	33	51	414	247	74	470	1149	1195	685	227	104	58	88	94	77	59	181	53	49	60	57	43	68	72	78	194	268	163	117	49	69	73	91	102	71
PCHAS_0730000	40	37	15	12	6	9	2	7	8	5	15	166	21	6	65	90	77	54	25	11	37	33	29	26	15	36	10	6	7	13	88	6	231	85	338	1315	689	434	56	100	116	42	159	42
PCHAS_0730100	20	19	11	25	15	12	11	8	5	6	1	28	8	1	12	19	31	11	13	16	32	86	57	58	60	72	47	52	30	69	45	51	33	36	61	80	110	52	15	12	32	50	54	40
PCHAS_0730200	66	59	90	102	49	29	12	19	36	15	5	45	10	6	18	64	33	16	43	64	289	178	166	211	274	518	471	313	250	375	409	263	83	87	134	122	168	100	59	34	102	130	341	238
PCHAS_0730300	172	163	327	273	128	85	86	130	197	61	82	791	468	8	308	322	259	133	171	157	2517	2794	2261	1285	1330	1930	1569	1271	1015	1339	2011	1061	656	634	1033	4355	3903	3647	5076	3125	5525	3823	6270	3426
PCHAS_0730400	79	97	120	121	97	57	61	64	97	54	25	76	10	3	27	30	38	12	41	49	223	133	112	208	245	492	562	397	270	603	732	448	204	196	306	266	367	137	34	35	70	87	183	140
PCHAS_0730500	495	546	716	693	496	316	223	455	546	143	140	386	92	6	170	299	259	124	275	395	751	1098	1035	1784	2233	1987	2199	1736	1110	2783	1918	1445	1547	1726	1902	2068	2921	1268	367	262	571	1291	750	1058
PCHAS_0730600	164	173	275	246	132	95	67	84	125	37	30	156	38	6	78	145	87	34	128	145	731	480	564	613	699	1291	1240	964	618	1181	1218	757	467	367	792	1168	908	516	137	145	354	417	944	772
PCHAS_0730700	3529	5039	5863	5306	3890	2593	2566	3334	4418	1466	1262	2477	1042	77	1970	2998	2951	1142	2997	3816	3144	9581	5258	7630	9155	8304	7895	6213	3833	10743	5919	6189	4681	4943	7979	3925	6249	4483	1301	1146	2354	8397	2593	5646
PCHAS_0730800	10	16	8	9	2	4	2	17	11	5	13	375	39	6	79	39	54	21	7	5	80	47	33	37	11	19	12	6	7	11	263	10	645	249	1090	3599	2015	1324	159	252	302	134	510	92
PCHAS_0730900	247	260	401	352	186	74	73	90	137	59	39	351	281	17	247	422	327	160	259	217	1246	1362	1270	954	882	1551	1110	900	748	897	705	595	206	158	392	692	699	620	821	649	1608	1713	2157	1954
PCHAS_0731000	333	295	499	399	232	148	61	242	247	46	100	560	105	2	198	325	200	81	267	256	906	2151	1476	2163	3398	1909	1626	1520	1052	1672	1413	851	3915	2983	3093	6561	5929	4108	641	896	986	2732	1130	1670
PCHAS_0731100	324	311	399	445	194	115	93	72	87	104	111	2508	1036	36	1405	805	730	415	388	361	2485	2251	1948	1225	1409	1535	1100	943	830	678	812	576	599	383	767	18169	11941	11141	4147	4839	6282	3411	7291	3726
PCHAS_0731200	2808	3563	3915	3655	2416	2915	2238	4772	6433	1351	3059	12353	3887	145	5024	4780	3927	1823	2408	2857	2815	9197	5241	4913	5994	3007	3081	2851	2061	4346	6181	2237	13846	12595	16691	14718	18368	13438	6835	5300	8568	14002	4681	6735
PCHAS_0731300	115	134	149	161	114	78	88	102	139	69	61	226	92	5	125	140	114	55	42	131	363	319	230	277	395	541	662	527	257	712	916	458	506	555	734	570	824	611	804	461	927	497	923	438
PCHAS_0731350	1510	2006	3103	2134	1421	1693	1973	2918	2926	1611	1463	4988	1837	72	2024	2545	2292	1029	1963	1711	9023	7298	6036	5620	6233	9133	7267	5799	4116	7099	16187	5682	9736	7933	14778	12066	15529	9438	5120	2747	7717	8354	15259	9455
PCHAS_0731400	81	75	117	117	63	33	27	24	31	14	35	707	366	14	338	213	127	89	70	106	440	716	505	320	323	274	256	210	148	159	214	112	185	150	261	4081	2810	2883	1622	1195	1966	1592	1464	975
PCHAS_0731500	15	19	9	10	16	37	28	53	51	22	33	84	4	1	14	4	5	5	3	12	5	2	0	4	9	10	20	25	11	99	55	45	29	40	63	27	44	27	1	5	4	4	4	3
PCHAS_0731600	4	4	4	4	5	4	8	12	9	1	9	19	4	1	2	2	1	1	3	2	5	5	4	0	4	4	16	3	5	23	58	22	86	73	82	31	83	59	11	9	17	2	13	1
PCHAS_0731651	41	18	33	45	18	9	8	3	4	4	12	248	145	3	74	82	23	17	20	22	16	16	15	5	7	11	5	5	6	2	5	3	0	3	5	37	23	36	39	23	34	27	46	21
PCHAS_0731700	13919	16701	36870	24009	10898	4955	3828	3587	3797	2895	1667	11220	17322	540	18003	34786	28095	11528	28608	19493	98726	107045	75585	57011	73623	79939	54101	52826	40527	30407	27985	24185	5070	7297	7804	18066	21838	21303	57873	25685	67409	107267	137649	98802
PCHAS_0731800	6	3	1	1	1	5	10	12	12	2	8	30	2	0	4	1	1	1	0	2	18	14	14	12	16	38	40	25	15	129	298	90	376	250	617	325	500	238	15	17	26	19	35	23
PCHAS_0731900	10	12	17	15	11	10	8	31	45	7	11	26	2	1	3	5	1	1	2	4	36	40	16	25	63	125	178	158	40	300	404	173	181	317	488	180	257	126	21	23	18	32	38	39
PCHAS_0732000	15	18	51	26	29	19	16	32	43	11	10	46	1	0	12	11	8	4	16	16	118	75	70	56	116	144	163	145	93	193	275	138	147	138	168	148	243	111	53	45	77	82	115	72
PCHAS_0732100	47	24	3	6	28	208	178	427	507	217	339	1310	27	8	176	36	64	18	11	20	83	52	23	14	32	20	30	25	16	100	1986	203	4326	4191	4801	2778	3431	2284	39	105	44	69	238	116
PCHAS_0732200	282	379	226	336	150	115	82	110	144	66	101	1034	882	39	1029	1586	1247	691	402	418	6955	6035	5354	3106	2613	2736	1908	1454	1555	910	1720	659	639	679	1062	3577	3580	3983	9072	4905	15844	10233	16256	10821
PCHAS_0800001	4	3	12	17	7	6	9	5	7	4	2	77	82	1	50	32	34	20	14	10	38	47	36	24	11	9	10	10	10	13	10	6	6	4	4	75	88	79	64	50	64	65	78	53
PCHAS_0800005	1	1	1	0	1	2	0	2	8	2	6	12	1	1	4	1	0	0	1	1	1	10	1	1	7	9	6	7	4	29	21	9	32	14	44	23	56	15	5	0	4	1	6	6
PCHAS_0800011	2	1	0	1	1	0	1	5	3	2	2	11	0	1	1	0	0	1	0	0	2	3	3	3	0	4	4	7	3	23	32	1	79	86	121	89	83	31	3	0	7	8	11	2
PCHAS_0800015	0	1	3	0	3	2	2	5	9	0	0	8	1	0	2	1	1	0	1	3	436	320	351	397	446	1173	2013	1402	479	2961	4462	1001	3431	2437	4204	2568	4412	1778	218	205	368	389	687	423
PCHAS_0800021	0	0	1	1	1	0	0	1	1	0	0	2	1	0	0	1	0	0	1	1	84	71	75	43	22	49	38	44	19	30	40	14	12	18	14	20	33	30	145	105	253	182	203	100
PCHAS_0800025	6	16	10	9	8	11	17	31	26	9	6	21	2	0	4	1	2	2	5	5	34	38	28	40	41	53	59	43	32	106	90	52	82	64	126	84	122	59	63	45	93	68	61	36
PCHAS_0800031	5	1	4	3	2	0	0	1	0	0	1	8	8	1	4	5	3	2	2	3	36	33	27	12	30	18	24	22	15	14	34	15	6	10	12	30	35	36	50	28	73	56	64	42
PCHAS_0800035	5	8	8	7	6	5	6	10	12	5	4	6	0	0	5	2	4	2	3	4	12	6	3	4	6	11	12	10	8	20	24	25	20	13	19	18	22	9	3	2	2	3	6	8
PCHAS_0800041	284	347	362	422	275	191	190	251	388	150	118	315	84	5	147	199	161	66	114	257	539	565	485	582	753	1260	1363	1050	645	1605	1720	1034	813	814	1310	900	1058	555	215	175	276	551	689	672
PCHAS_0800045	322	385	513	475	255	173	121	114	129	117	65	706	616	10	555	698	486	305	385	343	286	168	175	106	110	150	110	114	91	94	98	68	15	13	36	144	179	177	265	159	347	246	450	272
PCHAS_0800051	3	1	3	4	2	6	4	5	12	2	3	17	0	0	0	4	0	1	0	1	7	4	1	3	3	6	11	4	7	17	60	9	103	87	117	73	142	58	49	26	46	3	14	4
PCHAS_0800055	17	14	24	17	15	21	19	33	61	22	20	56	4	2	14	6	6	3	4	5	20	24	15	16	25	45	68	36	26	107	177	75	95	111	187	115	168	98	8	4	11	13	24	13
PCHAS_0800100	368	367	583	600	249	120	94	112	134	99	164	3536	3065	21	1696	1217	938	515	609	321	4439	3921	3055	2025	1978	1937	1428	1268	977	951	1248	806	790	678	1162	15283	12961	14134	9725	7734	11016	7382	13924	7458
PCHAS_0800200	6	2	12	1	4	1	5	7	14	3	5	18	12	0	9	7	12	3	2	4	12	16	15	4	18	22	2	7	4	8	12	9	54	22	59	164	143	80	6	9	9	11	33	6
PCHAS_0800300	145	132	255	251	104	52	26	39	38	22	9	127	111	5	110	144	98	44	115	109	140	224	230	171	179	257	177	165	122	158	87	87	28	21	41	135	134	144	130	86	188	301	261	239
PCHAS_0800400	1221	1755	1654	1643	1169	886	1003	1230	1460	664	506	2254	1061	53	1600	1687	1540	777	1063	1376	1441	2996	2154	1848	2270	2197	2156	1756	1398	2880	2416	1544	1525	1329	2492	4287	4095	3274	2254	1728	4362	4029	2114	3122
PCHAS_0800500	6516	8214	14033	10625	6330	3456	3325	3059	3547	2783	1200	5561	6100	206	6742	9886	8744	3499	9013	7684	37255	33034	29632	23604	28830	43547	31130	27717	20431	24072	23765	17805	5076	5840	8924	14741	16804	13868	12612	8322	18688	34659	51405	39361
PCHAS_0800600	1039	1209	1365	1471	912	655	607	732	1010	451	465	6082	4009	58	3306	2439	2166	1177	1063	1130	8270	8344	7205	4828	4992	6406	4148	4148	3035	3831	5032	2559	2397	2620	3224	25143	22068	25597	17409	14398	25731	16625	25844	14935
PCHAS_0800700	3115	3645	2343	2647	3565	6136	6278	9446	12026	6220	4797	12762	586	102	2427	633	910	301	427	1572	1431	1352	727	817	1573	4831	13584	8608	3040	26500	58693	19033	35345	26337	47657	31259	41982	20487	2100	2112	2701	1373	5487	1421
PCHAS_0800800	33	38	9	17	32	47	48	62	117	28	16	68	10	1	25	15	28	18	11	22	11	21	12	21	26	28	65	36	17	170	415	142	107	150	160	167	180	121	26	35	39	29	50	31
PCHAS_0800821	0	2	0	1	0	0	0	1	0	0	0	0	1	0	0	4	0	3	1	1	0	0	0	0	0	2	1	0	0	1	6	0	0	1	2	3	4	1	0	0	1	0	3	2
PCHAS_0800841	2	1	0	0	0	2	0	0	0	0	1	4	0	0	0	1	3	4	0	0	1	0	1	0	0	2	0	0	0	1	1	0	3	0	0	1	0	1	0	0	1	0	3	1
PCHAS_0800900	242	249	418	317	221	265	256	373	528	257	249	861	49	10	138	120	112	31	150	190	900	697	434	638	1026	1711	1696	1337	805	1841	4866	1407	2925	2220	4089	3091	3813	1884	223	205	289	349	970	541
PCHAS_0801000	295	309	445	389	274	210	211	419	465	121	168	550	40	6	96	154	123	49	164	232	395	332	372	814	1074	1016	1192	977	629	1661	1822	891	1836	1555	2257	1790	2306	913	90	95	197	309	341	353
PCHAS_0801100	101	107	159	147	86	78	50	76	114	39	44	107	49	2	69	127	85	33	83	105	533	673	562	403	423	712	632	470	378	558	675	403	251	192	400	339	403	190	207	100	336	640	846	661
PCHAS_0801200	338	343	540	384	343	315	257	486	681	127	252	671	57	9	121	142	111	39	155	238	357	429	431	949	1239	1117	1275	1076	629	2183	1941	1157	2445	1985	2923	2137	3059	1393	133	143	286	395	349	374
PCHAS_0801300	173	240	313	266	189	103	110	97	136	82	41	131	75	4	148	210	189	73	184	188	642	563	592	475	466	940	668	556	418	549	710	421	148	168	310	317	310	193	162	107	317	602	970	712
PCHAS_0801400	98	76	121	118	61	24	28	21	35	10	9	37	11	2	24	57	52	21	47	59	176	220	196	319	483	455	599	437	285	642	240	298	93	93	134	139	223	91	36	26	72	170	129	182
PCHAS_0801500	4212	4918	6939	6526	4153	2055	1401	2300	2910	727	820	2442	1874	87	2263	4354	3628	1389	3539	3912	6118	10396	10511	14042	15751	13433	11462	10605	7300	12661	7012	6211	3692	4328	6172	6027	7950	4431	4062	2520	7103	16646	7609	11319
PCHAS_0801600	14	6	3	3	4	17	7	37	27	18	36	343	18	2	65	18	23	5	3	16	46	34	28	15	12	18	9	10	8	15	269	24	622	304	797	1795	1156	675	116	144	250	75	192	51
PCHAS_0801700	1109	1387	1629	1396	952	789	760	930	1353	679	454	1534	750	55	1015	1305	1231	554	911	1100	4485	5243	4012	2998	3670	5918	5078	4002	2834	4576	7201	3567	2283	2401	3753	3083	4209	2801	4332	2350	5249	5712	7260	5348
PCHAS_0801800	62	36	19	18	9	4	5	12	18	3	12	82	31	8	70	94	134	66	33	14	29	163	113	105	89	98	36	29	23	37	11	31	128	65	139	176	226	139	18	12	33	96	45	34
PCHAS_0801900	339	354	502	446	249	136	73	145	151	33	43	336	334	7	291	526	371	166	284	304	1268	2095	2300	2688	2906	2099	1472	1427	1084	1378	809	741	429	526	572	1565	1929	1346	1288	748	2190	4446	2039	2558
PCHAS_0802000	269	288	469	406	232	96	66	118	141	34	43	128	72	2	88	264	184	67	201	241	602	989	1044	1651	2034	1665	1301	1187	937	1275	739	666	341	432	528	482	729	298	106	75	293	1199	630	950
PCHAS_0802100	461	260	153	98	50	51	12	105	106	13	111	1631	282	52	439	762	632	319	142	80	185	179	223	256	233	161	123	98	73	134	667	105	6218	2967	5371	11301	8899	5424	449	814	908	772	490	297
PCHAS_0802200	593	685	1073	915	572	275	207	251	386	124	87	289	214	15	285	583	487	174	531	546	1256	1997	1724	2047	2553	2302	2182	1881	1226	2150	1267	1124	443	631	735	534	810	442	399	226	724	2137	1200	1856
PCHAS_0802300	43	29	8	17	12	48	18	146	102	34	115	1559	70	19	287	80	81	40	8	28	143	115	83	64	64	47	41	39	23	28	833	59	6903	3724	5873	11676	9381	6622	446	926	972	576	432	249
PCHAS_0802400	343	258	506	444	317	278	157	361	553	97	215	694	128	5	142	233	160	66	181	246	951	1169	1172	1342	1566	2011	2150	1666	1016	2873	3572	1777	3174	2249	4501	3343	3953	1790	353	351	643	1258	1107	1321
PCHAS_0802500	36	21	10	8	6	43	23	96	80	26	82	1186	59	8	213	76	57	39	15	18	156	86	125	64	27	38	27	26	21	37	1606	61	4629	2075	5860	10033	7519	4074	384	683	1031	436	717	261
PCHAS_0802600	4194	4695	6437	5584	3913	2264	1529	3428	4375	657	1165	3295	1561	87	2003	3979	3010	1164	3197	3799	6962	15579	11403	14690	21018	13364	13719	12537	8624	16995	10342	8046	9718	12322	13224	9206	13652	8152	4363	3384	7291	21175	7924	13229
PCHAS_0802700	130	141	212	201	128	69	61	82	132	28	31	76	22	6	54	89	75	28	61	109	338	339	489	611	718	785	840	678	486	1031	745	511	319	315	473	501	551	192	72	58	156	380	328	420
PCHAS_0802800	20	11	11	14	9	9	7	21	20	6	15	421	49	2	109	35	29	19	9	11	45	42	59	44	25	28	31	17	10	45	87	28	404	143	500	4227	2347	1410	182	268	279	139	219	74
PCHAS_0802900	261	307	553	420	267	134	143	143	212	113	60	162	40	2	70	136	119	39	227	251	1221	1197	895	1137	1552	2474	2418	1954	1353	2365	2005	1507	476	539	818	574	942	376	195	81	275	857	982	933
PCHAS_0803000	441	475	763	713	441	277	190	308	411	112	125	353	134	18	216	429	350	125	340	415	1284	2662	1772	2248	3316	2467	2521	2027	1406	2734	1699	1317	1184	1309	1433	1674	2085	1235	743	561	1189	2615	1327	1892
PCHAS_0803100	50	63	92	66	57	37	36	56	67	25	23	300	27	9	74	46	60	29	34	52	119	112	91	164	165	226	212	179	104	267	317	149	782	255	968	2690	1659	871	58	101	160	144	184	96
PCHAS_0803200	213	199	458	361	196	85	68	48	66	21	23	60	24	2	76	169	127	28	208	212	1019	1093	1208	1778	2198	2337	2000	1642	1240	1703	903	912	143	241	289	231	361	162	93	66	243	943	782	959
PCHAS_0803300	142	143	95	92	102	237	188	464	550	162	269	1176	78	13	208	119	155	57	45	81	131	208	150	157	172	198	344	222	90	635	1615	481	2902	1926	3790	3348	3637	1946	159	257	353	211	342	151
PCHAS_0803400	1515	1712	1037	1063	1365	2567	2548	5325	5500	1839	2253	6004	329	49	1254	452	664	266	276	735	522	698	413	567	975	1269	3609	2475	866	8446	12365	5200	16276	15307	21654	14961	19812	10927	825	1424	1741	1030	1269	689
PCHAS_0803500	1493	1565	2385	2056	1460	1129	763	2190	2279	352	998	2994	291	25	708	1082	850	281	987	1200	1817	2400	2509	4959	5445	4846	4412	3881	2515	6239	6259	3047	9552	7478	11327	10262	12772	5624	622	777	1373	3075	1791	2476
PCHAS_0803600	329	368	736	681	329	109	64	53	67	34	27	64	56	4	107	256	184	65	258	378	614	885	826	1387	1801	1717	1457	1242	966	1086	420	547	87	137	176	151	219	104	89	40	184	705	503	795
PCHAS_0803700	3227	4193	5705	5148	3204	1945	2146	2105	2681	1979	829	2520	1862	56	2899	3919	3596	1429	3545	3555	16102	19854	13966	10345	12360	20112	15155	12562	9620	12735	13337	9806	4149	3615	6537	5411	6926	4923	8860	4352	10508	17318	21676	18068
PCHAS_0803800	1323	1608	1927	1677	1422	1307	1417	1780	2297	1256	808	2022	152	17	436	290	378	133	530	947	1729	1218	795	2008	3418	6951	8457	6198	3795	10521	15794	7360	6379	5370	10377	6194	8558	3897	463	426	845	699	2028	957
PCHAS_0803900	2696	3345	5047	3971	2857	1612	1463	2188	2669	805	731	1910	495	38	974	1637	1430	523	1975	2550	5600	9265	7206	11730	17691	16241	15115	14627	8806	17678	11123	9600	8036	9574	10914	6971	10828	5243	1456	1228	2705	8783	4833	6940
PCHAS_0804000	409	425	691	596	371	357	320	735	781	179	332	1197	51	11	220	169	170	71	202	290	355	314	254	828	1458	1241	1403	1257	734	2221	2383	1268	3854	3586	4553	4734	5736	2897	298	428	543	454	363	344
PCHAS_0804100	64	123	169	123	98	55	74	60	91	66	32	92	10	4	25	38	27	18	55	57	120	79	51	128	213	370	452	309	212	428	538	298	240	204	314	235	342	140	26	39	35	43	103	47
PCHAS_0804200	17	13	14	16	13	2	4	17	17	9	9	313	47	4	110	28	36	20	12	7	42	21	27	19	25	33	27	23	23	42	101	49	122	56	303	2069	993	661	121	170	165	57	292	56
PCHAS_0804300	4464	6037	7774	6893	4482	2828	3057	3015	3686	2449	1174	3251	2068	116	3603	4737	4735	1869	4744	5056	14718	18914	13820	10612	12763	19615	16208	12920	10103	13426	13049	9760	4461	3881	6751	5706	7768	5032	7514	4165	10601	16608	18888	17819
PCHAS_0804400	4867	5998	7980	7051	4587	2371	2041	3135	3320	1223	952	2802	2033	119	2800	5034	4238	1577	4397	4936	7642	17657	11923	14258	21263	14373	13130	11750	9113	13452	7483	6485	4565	6672	6391	6414	8153	6219	6662	5364	12221	21413	7659	13423
PCHAS_0804500	125	135	282	243	125	51	54	30	48	27	19	20	15	0	25	62	48	20	100	135	375	364	290	584	746	1079	1050	887	619	857	509	442	84	125	156	149	209	84	35	21	61	179	282	304
PCHAS_0804600	33	26	30	20	12	9	9	4	14	6	5	42	10	2	26	39	57	23	10	10	21	70	43	67	70	110	69	58	39	86	58	53	80	79	155	189	226	123	24	27	45	46	61	45
PCHAS_0804621	1	2	0	0	0	0	1	0	1	1	0	3	0	0	4	5	0	4	0	0	1	3	1	0	4	4	5	3	1	3	4	1	8	1	7	14	14	9	5	2	1	4	1	5
PCHAS_0804641	4	0	0	1	0	0	0	0	1	0	1	1	1	0	4	4	6	1	1	0	1	0	1	3	3	5	5	4	1	3	7	2	7	6	5	17	13	12	7	4	5	5	7	2
PCHAS_0804661	0	1	0	0	0	0	0	0	0	0	0	2	0	0	0	1	1	0	1	0	0	3	2	0	1	1	1	1	1	4	9	2	2	2	1	6	13	6	4	3	7	1	1	2
PCHAS_0804681	0	0	0	0	0	0	0	0	0	0	0	1	0	0	0	0	0	1	0	0	0	0	0	0	2	0	0	0	0	0	0	0	0	0	1	0	0	1	0	1	0	0	1	1
PCHAS_0804700	1116	1551	1541	1458	1233	988	952	1661	1724	486	584	1234	138	21	419	590	541	231	656	949	1047	1444	1224	2532	3320	3259	3532	2888	1636	5398	4256	2634	3610	3626	5181	3867	5600	2517	287	321	531	1341	1004	1289
PCHAS_0804800	99	101	23	48	41	53	73	253	138	128	274	6079	569	68	1948	373	418	260	48	73	924	493	548	248	205	175	113	131	124	77	2024	100	14085	5825	14756	60729	42151	29905	2253	4272	4721	2322	4898	1388
PCHAS_0804900	852	865	1539	1319	706	287	205	179	251	111	74	481	481	12	515	1005	703	281	739	846	2716	3956	3496	3356	3720	4139	3361	2881	2156	2701	1339	1408	235	365	461	704	930	821	1557	975	2833	4807	3655	4040
PCHAS_0805000	1140	1062	2141	1810	948	449	290	514	690	144	235	1641	1485	35	923	1749	1137	451	1073	1063	5052	7814	7659	7443	8270	6820	5749	4962	3855	5625	3464	2807	1985	1967	2845	7200	7342	6060	5427	3498	8805	13090	7666	9318
PCHAS_0805100	297	349	522	486	292	206	181	208	311	134	85	196	28	2	83	170	151	49	228	270	572	696	489	711	966	1295	1329	1097	627	1370	1111	872	462	424	657	401	631	281	64	42	126	416	480	514
PCHAS_0805200	1162	1384	1909	1663	1165	663	568	710	953	318	277	782	284	21	499	952	798	270	916	1110	2070	2421	2492	3102	3380	4075	4015	3215	2210	4695	3161	2423	1539	1414	2701	2272	2679	1257	476	331	1103	2642	2207	2704
PCHAS_0805300	896	882	1508	1308	893	556	460	668	841	228	260	608	106	7	211	406	257	100	481	685	901	1116	1143	1899	2663	3127	3328	2824	1572	4412	2889	2201	1585	1765	2562	1870	3045	1222	207	205	467	979	771	1059
PCHAS_0805400	732	792	1364	1175	727	428	356	458	599	248	172	786	613	20	729	1029	734	334	667	775	3505	4211	3549	2801	3151	4766	3858	3130	2465	3409	3103	2266	862	848	1523	1725	2127	1862	3203	2161	4836	5073	5720	4928
PCHAS_0805500	200	207	398	310	188	84	84	80	116	54	34	73	12	2	24	64	44	18	104	170	302	194	147	473	836	886	1139	807	562	1177	773	593	176	242	302	282	437	197	51	37	91	156	195	152
PCHAS_0805600	111	68	229	165	110	50	26	49	94	22	27	123	90	0	45	123	55	27	72	78	1201	1246	960	758	1028	1794	1591	1234	914	1355	1481	975	300	397	546	432	705	496	766	486	1148	1203	1883	1355
PCHAS_0805700	175	219	392	348	190	96	100	135	188	59	52	188	125	7	124	214	130	64	163	197	970	831	795	652	769	1413	1269	965	704	1199	1141	806	220	234	477	330	516	360	455	250	839	911	1340	1106
PCHAS_0805800	128	159	227	214	139	67	42	47	68	36	13	54	17	3	37	79	73	29	85	129	133	224	179	381	478	554	495	428	255	532	241	291	130	128	194	165	203	79	27	19	38	151	121	159
PCHAS_0805900	325	342	621	549	301	143	139	133	206	102	48	133	62	1	124	243	207	82	241	307	1212	1502	1130	1153	1575	2261	2106	1669	1149	1892	1572	1232	316	418	494	342	517	239	189	85	286	1001	1271	1260
PCHAS_0806000	17080	22687	32204	26722	17529	8030	7440	6510	8106	5080	1994	5956	6455	316	10413	16353	15783	5774	17301	19185	29153	69832	46698	52155	79921	60755	51727	49653	32744	46520	21604	23043	8674	13877	13818	12501	16944	11268	13137	8771	22148	78775	30412	49781
PCHAS_0806010	25	17	47	38	17	12	7	7	7	4	4	21	12	0	8	34	15	11	13	17	111	128	156	89	129	167	128	99	88	104	73	98	13	33	16	33	43	45	43	24	67	168	148	151
PCHAS_0806100	318	398	548	526	289	206	206	221	278	134	84	261	119	7	234	395	374	139	314	371	576	932	633	719	796	827	896	689	465	848	574	518	397	396	549	510	553	339	140	127	282	813	551	724
PCHAS_0806200	390	380	195	208	237	827	706	2009	1678	591	996	3570	144	39	623	263	382	144	95	168	209	163	168	208	244	215	534	352	156	1470	4007	998	7761	4896	10128	8530	10630	4580	298	383	714	378	566	225
PCHAS_0806300	187	225	218	235	135	113	99	122	170	89	43	211	148	7	145	245	195	93	145	151	741	652	610	425	550	782	696	590	372	605	686	417	272	253	359	405	493	370	570	387	777	892	1240	856
PCHAS_0806400	534	486	949	808	471	206	131	216	299	114	119	501	460	9	407	807	543	191	460	492	1396	2125	2064	2084	2213	2128	1909	1612	1157	1839	1034	988	519	536	776	1121	1481	1144	1398	989	2370	3091	2044	2581
PCHAS_0806500	300	405	583	435	323	293	277	283	394	225	111	236	20	1	74	83	119	19	175	264	417	271	173	368	629	1198	1321	956	601	1330	1409	978	663	471	878	638	907	398	59	39	77	121	301	159
PCHAS_0806600	33	29	34	29	21	13	9	18	24	11	10	46	19	6	29	69	66	37	20	20	36	74	87	105	72	91	56	45	38	71	68	46	45	50	77	74	102	59	11	16	31	70	75	29
PCHAS_0806700	639	723	1063	897	633	411	367	545	760	238	282	741	123	16	298	528	486	177	536	583	1329	1793	1424	1801	2201	2484	2600	2086	1327	2844	2280	1938	1855	1821	2471	1785	2552	1321	267	222	557	1487	1250	1639
PCHAS_0806800	484	537	925	777	559	269	208	181	248	148	71	164	55	7	139	267	208	84	342	487	1170	1099	826	1194	1861	2776	2894	2187	1428	2581	1933	1554	251	396	538	492	671	310	207	84	342	742	1041	983
PCHAS_0806900	489	529	822	848	504	201	167	148	203	101	46	154	90	9	197	460	347	147	391	448	1579	1481	1481	1704	1963	2744	2556	2010	1462	2076	1318	1170	183	350	349	323	453	212	314	158	755	1517	1734	1866
PCHAS_0807000	438	449	526	438	423	268	168	495	481	89	146	408	66	8	95	62	89	47	105	260	150	193	131	457	1163	932	1472	1285	563	2253	1401	1006	1973	1912	1890	3117	3216	1649	175	252	329	315	210	143
PCHAS_0807100	95	64	44	33	13	10	6	19	20	6	20	89	45	9	85	143	183	88	26	28	27	92	50	79	68	71	42	23	23	44	20	19	78	58	116	166	230	125	6	17	12	42	56	19
PCHAS_0807200	288	298	429	392	313	192	174	252	366	86	83	176	27	3	46	44	50	17	84	180	203	166	120	471	872	976	1701	1259	620	2439	1472	1329	829	1033	1240	934	1424	630	75	97	161	130	169	144
PCHAS_0807300	3425	4115	5062	4896	3305	2198	1845	2858	3334	1095	904	2556	1384	55	1672	3126	2468	912	2444	3088	4798	6749	7290	9171	9939	10361	9282	8289	5479	12098	8068	5944	4075	4648	6991	5030	7272	3827	2414	1786	5072	10368	5907	7918
PCHAS_0807400	283	315	567	444	252	127	69	110	174	46	47	166	158	7	164	375	261	108	300	276	1213	2236	1793	1609	1784	1881	1821	1474	1113	1589	875	1012	247	283	446	353	573	301	464	303	825	2013	1548	1956
PCHAS_0807500	67	80	41	11	6	9	2	5	13	1	8	97	46	14	58	183	176	106	39	9	5	27	20	24	9	37	17	12	5	15	9	10	23	16	42	66	29	10	8	7	9	14	23	13
PCHAS_0807600	521	672	801	757	520	278	246	204	309	146	68	133	41	4	118	192	161	72	310	463	746	797	744	1308	1798	2492	2523	2032	1271	2735	1417	1444	358	408	660	445	732	275	55	41	127	593	548	672
PCHAS_0807700	328	276	687	516	308	134	94	117	193	69	45	123	72	4	106	261	150	59	239	279	869	1306	928	1128	1313	1874	1618	1280	899	1593	1088	902	248	251	452	245	384	177	122	63	238	992	935	1154
PCHAS_0807800	1101	1224	1707	1462	1097	672	552	1095	1284	322	322	805	110	21	262	375	345	139	542	854	1159	1556	1003	2463	5076	4002	4865	4143	2419	6336	3837	3246	3189	4185	3826	3257	4985	2483	489	607	821	1222	851	1059
PCHAS_0807900	6924	9331	11700	10430	6712	4385	4970	4455	5494	4307	1880	5107	3358	156	5704	7487	7624	3054	7535	7755	22424	30600	20422	15919	20270	29808	23182	19808	15232	19719	20751	15047	6941	6690	11159	8071	11695	7307	10567	5829	14113	26559	28610	25669
PCHAS_0808000	78	73	66	46	43	103	92	288	277	68	159	681	59	9	134	114	96	45	25	43	120	159	142	148	120	149	181	102	71	393	1299	269	2539	1680	3059	3051	3028	1520	150	184	407	263	263	211
PCHAS_0808100	69	63	59	58	59	95	70	157	252	49	105	495	23	2	52	39	37	21	14	27	83	65	50	42	65	177	395	275	108	815	1764	510	1993	1384	2534	2499	2643	1236	98	196	264	105	286	69
PCHAS_0808200	1345	1668	2103	1980	1245	817	640	1557	1518	318	696	3244	1181	52	1466	1914	1859	705	1270	1493	2070	4453	3904	4840	5633	3851	3001	2784	2135	3106	3171	1676	7294	4964	6318	12505	10880	6318	2127	1722	3812	8424	3166	4668
PCHAS_0808300	247	119	88	78	115	582	282	1437	1746	298	1040	4978	178	19	521	187	183	46	44	79	363	245	259	239	200	178	228	157	105	939	5739	859	17260	11081	21241	18022	18969	9453	525	770	1136	751	1019	498
PCHAS_0808400	2	1	6	1	1	0	3	2	0	0	0	2	0	0	1	2	0	0	1	3	2	4	1	3	6	6	2	9	5	5	4	8	3	4	4	5	2	4	0	0	1	0	0	2
PCHAS_0808500	1269	1354	2308	1822	1333	872	866	949	1399	596	388	815	133	12	281	446	403	124	710	1006	3855	3093	2360	3489	5362	10190	9853	7804	5094	10666	10936	7275	3080	3160	5192	2907	4585	2144	369	274	721	1938	3123	2860
PCHAS_0808600	410	506	766	692	391	199	162	206	302	116	90	405	232	13	244	487	333	121	325	393	1849	2113	1941	1885	2255	2849	2779	2178	1595	2627	2237	1654	896	875	1275	3649	2891	1793	798	713	1507	2227	2309	2196
PCHAS_0808680	51	29	74	76	39	41	19	37	102	12	16	62	13	0	6	11	8	3	9	33	46	36	41	88	106	241	310	242	117	509	402	283	207	143	484	117	241	91	5	9	11	24	47	31
PCHAS_0808720	153	192	221	208	189	149	153	268	379	113	94	159	33	0	46	57	52	23	62	134	113	185	106	198	323	656	811	621	325	1271	1152	734	710	550	1259	339	542	290	19	22	65	55	173	106
PCHAS_0808800	263	291	473	388	219	105	117	99	107	84	36	80	61	2	109	208	147	60	212	227	856	648	644	661	710	1370	1223	876	686	995	840	674	87	129	220	162	273	120	87	44	243	468	921	807
PCHAS_0808900	249	265	466	305	281	167	138	255	307	57	66	123	32	9	48	99	86	24	120	211	962	926	742	999	1427	2090	2112	1712	1159	2564	1611	1283	564	583	953	660	1009	434	136	86	295	654	954	759
PCHAS_0809000	1439	1650	2516	2165	1410	764	510	698	1002	274	283	666	385	25	522	1268	911	334	1095	1388	2439	4307	3742	5179	6369	5982	5519	4767	3091	6152	3153	2838	1445	1742	2397	1839	2682	1224	473	301	911	4214	2481	3747
PCHAS_0809100	348	485	691	604	354	195	171	119	188	136	42	147	75	9	177	335	294	106	377	430	814	1108	707	799	1075	1482	1422	1241	815	1001	697	679	385	295	400	261	380	216	184	97	293	691	959	853
PCHAS_0809200	1422	1666	2183	2002	1386	1178	988	1511	2045	718	653	1823	299	28	642	861	851	271	951	1285	2163	3234	2346	3322	4425	5252	5400	4420	2647	6534	6066	3436	4905	3959	6519	5344	6429	3204	565	483	1042	2546	2329	2485
PCHAS_0809300	439	478	820	660	471	263	152	291	383	83	83	250	38	2	70	191	123	40	270	427	520	883	558	1301	2192	1880	2185	1708	1076	2717	1153	1238	692	807	1165	863	1251	682	68	64	159	530	388	478
PCHAS_0809400	473	496	863	687	440	360	275	492	597	223	265	882	126	14	225	353	258	88	355	427	2346	2337	1809	1915	2101	3863	3208	2539	1837	3030	5016	2192	2620	1747	4140	2389	3099	1486	321	235	669	1477	2570	2091
PCHAS_0809500	192	205	290	266	180	157	149	201	314	119	119	292	32	2	87	81	65	25	97	155	547	555	407	519	808	1346	1530	1162	715	1644	2189	1086	1307	1059	1896	1062	1524	756	95	112	173	304	589	465
PCHAS_0809600	216	207	307	266	191	156	158	200	282	108	92	192	12	2	48	49	33	9	77	147	180	90	77	254	432	799	967	764	399	1271	1352	804	516	465	897	595	837	369	39	33	68	57	149	95
PCHAS_0809700	149	169	216	193	125	136	108	180	267	106	101	684	53	6	126	150	94	53	95	141	550	457	454	533	618	878	797	658	479	808	2551	600	2599	1687	3451	3261	3169	1778	220	337	541	429	905	621
PCHAS_0809800	58	27	101	80	45	28	18	26	53	15	26	73	5	0	12	14	18	3	39	30	164	92	86	167	244	318	405	278	225	349	389	231	173	159	197	225	300	141	23	39	55	63	128	92
PCHAS_0809900	87	61	47	45	31	197	125	442	453	115	280	1378	51	6	202	64	96	27	19	37	68	65	52	82	106	89	82	76	47	230	1399	221	3693	2697	4673	3647	4186	2134	158	308	403	184	247	102
PCHAS_0810000	329	286	552	398	302	170	149	173	280	115	68	150	34	3	53	116	76	32	178	270	666	342	237	537	1135	1945	2228	1881	1133	2260	2504	1603	580	722	927	546	811	419	52	92	144	210	418	297
PCHAS_0810100	463	602	863	703	428	219	202	167	207	147	51	278	284	10	380	635	519	225	524	538	2741	2638	2411	1756	2039	2830	2401	1950	1528	1805	1540	1276	226	250	391	399	573	434	1226	696	2299	3018	3798	3240
PCHAS_0810200	307	380	525	471	297	199	198	228	296	169	92	318	138	7	194	371	255	92	280	302	1460	1282	978	916	1080	2060	1525	1324	1019	1369	1720	1001	648	567	983	1258	1207	708	475	365	683	1168	1987	1315
PCHAS_0810300	320	402	545	488	277	129	137	97	139	80	46	261	163	11	264	439	407	171	295	339	1062	1436	1147	1070	1350	1494	1334	1204	804	1105	875	670	479	370	680	1073	938	514	456	308	854	1456	1477	1377
PCHAS_0810400	161	176	292	254	131	56	51	22	58	17	15	83	40	6	81	216	172	64	172	176	872	725	820	979	1011	1537	1256	981	827	926	750	616	140	127	180	329	311	140	128	88	238	643	996	899
PCHAS_0810500	312	321	353	354	184	101	85	129	181	72	97	722	439	22	400	653	511	251	238	216	960	1392	1133	1011	1093	872	942	704	513	916	668	544	546	463	748	2159	2005	1662	1439	965	1921	2278	1630	1609
PCHAS_0810600	17	15	6	4	2	2	1	4	5	1	4	14	5	0	18	30	28	12	4	2	8	21	20	21	25	39	22	19	7	16	14	14	17	13	28	67	58	57	47	30	46	27	38	22
PCHAS_0810700	8	15	10	4	3	2	3	0	0	2	1	16	7	0	5	28	15	10	4	3	17	28	14	13	11	21	12	7	9	8	18	7	16	13	30	38	39	35	21	15	23	16	22	10
PCHAS_0810800	718	1063	1302	1212	759	367	421	341	466	303	126	351	180	14	428	748	682	271	696	802	2231	2774	1984	1818	2476	3321	3082	2508	1794	2463	2162	1829	435	605	722	556	887	473	975	426	1411	2387	2739	2418
PCHAS_0810900	1785	2157	2750	2457	1763	1156	1054	1631	1981	605	577	1536	495	36	834	1514	1348	486	1443	1695	2868	3717	3595	4497	4757	5356	5447	4145	2780	6339	5362	3405	3128	2850	4800	3861	5163	2379	1199	891	2495	4616	3444	4075
PCHAS_0811000	1139	1912	584	273	155	193	69	146	231	132	265	1482	870	401	2043	4480	4540	2964	867	292	84	153	155	221	93	391	129	67	55	167	79	134	261	185	756	928	495	301	80	135	99	152	196	64
PCHAS_0811100	88	47	42	40	44	89	47	161	242	42	130	787	31	1	76	50	38	13	20	26	149	151	153	105	91	141	229	142	79	560	2330	475	2939	2372	3878	4442	4696	2576	337	561	845	234	475	182
PCHAS_0811200	1111	1115	1582	1561	985	615	391	587	800	230	201	954	533	23	513	887	640	283	650	842	2243	4030	3411	3512	4218	4357	4741	3617	2409	5508	3477	3055	1209	1564	2152	3903	3907	2843	2304	1641	3589	5302	3324	3934
PCHAS_0811300	788	930	1288	1150	809	553	629	654	782	554	257	538	217	20	414	642	648	222	698	745	2293	2176	1615	1380	1811	3133	3011	2360	1559	2924	3441	2156	945	1010	1680	1126	1730	826	922	556	1171	1895	2648	2007
PCHAS_0811400	612	650	1021	905	545	300	268	306	415	162	107	233	110	10	199	480	367	116	483	553	1200	1592	1589	2023	2765	2747	2473	2266	1566	2767	1795	1431	647	800	1040	706	1028	463	194	116	417	1403	1051	1540
PCHAS_0811500	5	2	3	4	0	2	0	1	0	1	0	1	0	0	1	3	4	0	2	2	5	5	9	6	8	6	6	7	7	6	8	5	3	3	5	6	7	5	0	0	6	7	4	3
PCHAS_0811600	2034	2526	3329	2848	2040	1378	1265	1605	2276	888	606	1764	584	42	814	1330	1123	399	1155	1750	5358	5484	5450	7074	9319	13895	12541	11229	6720	14649	15252	8779	6054	6596	9248	6770	9904	5037	2479	1901	4797	6264	6989	6725
PCHAS_0811700	850	800	1252	1166	771	457	266	725	832	137	409	2393	881	28	732	1085	727	343	614	743	1632	2479	2976	3729	4301	3279	2677	2461	1835	2928	2335	1426	3825	2637	3781	7197	7450	4439	2490	1428	4362	6783	2961	3848
PCHAS_0811800	149	159	294	229	141	57	51	54	82	28	7	111	95	0	76	161	100	38	119	138	1335	1306	1341	1118	1235	1896	1575	1246	890	1346	1219	835	183	243	365	404	546	414	824	459	1505	1589	1962	1584
PCHAS_0811900	664	779	1633	1220	665	213	158	164	236	99	68	156	94	7	221	583	496	149	754	805	1334	2129	1677	2752	4113	3044	2359	2512	1688	1934	789	941	273	433	490	339	451	241	110	54	218	1582	1010	1637
PCHAS_0812000	262	288	427	385	266	140	139	132	167	94	52	219	64	5	127	176	141	48	169	229	770	654	519	624	928	1483	1543	1180	868	1496	1500	896	379	337	672	1720	1053	700	155	213	371	487	975	719
PCHAS_0812100	5	10	4	2	4	1	0	0	0	1	2	16	7	1	12	26	27	14	7	2	21	64	42	35	18	23	17	8	6	11	4	10	8	9	30	40	47	32	12	11	26	27	45	14
PCHAS_0812200	175	174	211	229	116	120	85	163	280	79	82	881	523	10	477	420	318	196	175	147	1381	1575	1352	626	648	880	773	571	486	847	1278	577	806	760	1125	2692	2597	2642	2801	2010	4113	2612	4081	2355
PCHAS_0812300	398	519	296	291	423	667	742	1269	1513	598	610	1516	101	22	349	132	212	86	91	203	200	265	159	173	249	536	1455	995	365	3186	5651	2292	4055	3348	5945	3464	4820	2359	168	252	452	267	616	230
PCHAS_0812400	92	86	37	39	60	155	136	269	376	131	159	599	25	7	94	42	60	29	20	35	71	54	38	33	34	72	276	165	58	604	2010	534	1444	1327	1873	1702	2107	1028	152	225	287	84	293	87
PCHAS_0812500	11	11	5	5	4	8	4	18	15	3	40	1225	133	7	294	75	54	39	10	14	141	90	138	45	37	29	33	18	19	18	83	13	601	190	719	9805	5622	4978	636	992	1215	416	662	242
PCHAS_0812600	37	38	33	24	35	72	41	110	168	50	82	406	18	1	44	24	25	7	7	17	92	61	58	45	50	123	352	256	105	695	2076	631	2056	1006	2298	2237	2664	1096	85	109	215	68	282	79
PCHAS_0812700	28	52	57	41	32	34	24	32	31	17	9	24	2	1	7	20	7	4	10	26	47	23	24	39	77	82	126	99	51	138	127	86	84	78	119	94	126	72	12	9	20	32	29	33
PCHAS_0812800	188	194	367	335	174	66	52	61	85	36	29	59	24	4	43	130	100	27	161	169	543	587	636	959	1177	1145	1109	994	668	1052	659	600	132	205	213	196	299	138	51	41	122	506	391	643
PCHAS_0812900	129	199	88	34	30	26	1	19	40	5	39	263	157	35	178	552	448	239	107	29	29	23	38	37	15	92	35	14	13	41	63	40	55	36	129	208	93	58	16	20	23	22	44	9
PCHAS_0813000	645	702	888	725	673	746	698	1275	1548	579	700	2286	133	12	405	229	206	77	222	417	446	285	214	571	811	1594	2531	1776	928	3727	6012	2479	5049	3240	7968	5679	6737	3353	260	390	590	282	776	328
PCHAS_0813100	661	733	1032	914	661	436	329	663	827	210	277	548	80	9	181	336	293	77	389	469	879	1299	1024	1858	2286	2236	2511	1880	1268	3377	2282	1671	1749	1519	2675	1785	2819	1045	135	131	294	974	662	859
PCHAS_0813200	765	861	1714	1288	849	431	319	273	390	219	101	198	93	14	196	472	418	124	558	798	2947	2861	2114	2616	3639	6543	5658	4655	3048	5005	4075	3085	599	763	1140	802	1029	501	267	145	490	1670	2590	2201
PCHAS_0813300	2333	2845	4014	3574	2383	1449	1377	1880	2299	1102	791	2917	1166	52	1741	2496	2276	777	2163	2431	7354	8180	7023	6214	8709	10835	9657	8512	5861	8676	10407	5873	4583	4802	6767	9968	9253	6152	4139	3152	7048	9517	9756	9016
PCHAS_0813400	114	104	80	75	81	194	150	470	567	139	275	1095	54	6	176	77	70	36	36	56	155	234	152	199	212	256	361	261	124	858	2122	623	4132	3183	4897	4328	5525	2452	249	327	493	339	358	247
PCHAS_0813500	142	158	215	205	122	62	51	38	61	31	21	55	38	0	87	143	100	45	121	141	569	708	644	639	814	955	940	679	487	742	478	484	80	124	147	195	242	154	144	100	307	673	665	758
PCHAS_0813600	96	144	71	33	19	22	3	9	20	9	20	183	105	18	117	394	236	162	54	19	37	39	48	47	29	112	59	43	33	59	41	49	51	32	109	151	74	39	12	15	25	47	58	26
PCHAS_0813700	759	1025	1419	1150	813	539	549	719	825	460	294	1058	128	12	386	533	505	207	617	743	2830	2215	2035	2692	3959	6139	5303	4768	3155	4934	7169	3454	4029	3133	5384	5155	5810	2929	573	655	1252	1877	3188	2293
PCHAS_0813800	960	1339	1630	1409	905	680	751	831	1116	547	377	1192	392	29	729	1202	998	442	912	944	2837	3003	2192	2134	2614	3856	3702	2786	1903	3432	3997	2417	1864	1446	2636	2423	2882	1471	929	528	1541	2566	3595	2823
PCHAS_0813900	9	2	6	6	5	2	1	3	6	2	5	22	5	1	5	16	11	6	3	6	19	30	14	16	17	33	16	8	9	11	57	11	38	44	62	112	157	77	9	23	12	22	18	13
PCHAS_0814000	20	50	51	30	29	13	14	27	29	14	15	36	5	0	7	6	8	5	12	27	76	45	42	59	134	246	235	187	119	192	332	169	148	132	242	137	210	100	26	19	33	44	69	47
PCHAS_0814100	236	288	405	414	219	111	95	120	141	74	56	128	133	2	188	328	321	106	293	233	1327	1742	1418	1308	1438	1644	1387	1091	912	1185	854	699	240	266	432	379	521	308	573	303	1076	1810	1639	1826
PCHAS_0814200	940	877	1651	1303	935	641	467	747	1046	324	303	739	98	11	193	387	259	75	517	672	2001	2300	1794	2906	4301	5856	6161	5002	3121	7642	6577	4636	2847	2814	4640	2549	3898	1906	203	212	550	1567	1679	2055
PCHAS_0814300	442	605	602	672	394	260	307	277	352	211	90	490	399	17	454	583	498	223	400	515	1559	2090	1429	1128	1362	2192	1877	1532	1057	1705	1426	1190	414	445	687	827	1037	982	1513	899	1827	2281	2876	2224
PCHAS_0814400	225	294	490	429	228	103	81	74	80	54	17	72	20	5	48	154	120	34	238	249	617	604	618	990	1259	1479	1281	1191	797	1203	751	693	124	165	217	218	306	155	94	57	130	412	441	573
PCHAS_0814500	2109	1817	4314	3211	2015	1099	887	1176	1659	632	446	1088	469	22	588	1223	926	284	1506	1795	9761	11378	7617	8986	13185	20433	15892	13742	9964	14919	16551	10451	4373	4450	7460	4089	6613	3321	1525	772	2516	7173	10539	9413
PCHAS_0814600	454	531	802	713	392	176	147	113	179	131	53	223	194	13	296	629	529	241	470	480	2792	2067	2082	1880	2085	3264	2565	2168	1764	1809	1553	1164	228	274	430	354	531	315	703	347	1508	2304	3615	2685
PCHAS_0814700	368	367	674	541	311	222	169	182	264	159	71	208	48	4	90	195	158	42	284	328	1108	990	693	871	1095	1916	1707	1349	971	1555	1687	1031	368	415	612	451	708	316	146	91	211	516	915	651
PCHAS_0814800	289	310	446	435	265	229	206	239	312	156	90	279	44	6	134	207	192	67	184	263	1040	595	643	731	833	1403	1564	1120	901	1659	2165	1053	761	697	1126	952	1360	514	207	175	431	485	1113	779
PCHAS_0814900	370	481	541	548	332	208	206	203	323	134	95	220	103	5	163	275	290	110	251	315	797	857	1002	1041	1249	1469	1696	1398	884	1970	1634	1109	487	617	788	661	998	468	259	189	529	1014	988	1171
PCHAS_0815000	437	498	723	594	431	307	259	425	562	175	178	467	92	13	152	270	227	75	313	322	967	1161	1083	1197	1509	1830	2177	1599	1070	2496	2081	1554	1163	911	1636	1310	1854	880	239	147	532	1041	1050	1143
PCHAS_0815100	10	6	5	19	7	12	14	19	21	10	24	335	57	8	141	30	28	33	2	10	43	36	45	25	16	21	41	20	15	50	112	46	123	77	190	2627	1291	1064	222	344	343	77	337	81
PCHAS_0815200	165	133	306	225	142	72	57	93	124	30	43	90	30	5	33	92	49	29	75	127	572	843	705	972	1260	1344	1397	1139	725	1641	926	851	393	399	659	454	722	276	93	54	189	691	524	667
PCHAS_0815300	127	112	179	151	92	57	26	53	67	19	22	86	36	0	67	152	115	47	104	81	441	498	516	547	537	622	582	474	354	616	384	356	110	111	217	298	324	150	81	67	204	512	495	574
PCHAS_0815400	272	295	140	76	53	31	12	42	55	8	79	1189	318	57	480	806	702	423	156	63	189	293	229	238	177	184	210	157	120	192	150	103	681	272	814	8936	4644	3997	544	869	804	410	462	269
PCHAS_0815500	691	809	1039	962	622	383	391	361	495	298	180	863	472	30	707	973	897	349	670	674	2729	3067	2515	2065	2450	3616	2788	2397	1785	2322	3080	1705	1533	1362	2350	3569	3212	2058	1675	1359	3163	3244	4585	3589
PCHAS_0815600	274	230	510	399	213	80	28	40	67	16	21	139	200	7	166	398	244	89	245	214	946	1973	1443	1669	1738	1328	1075	902	751	978	356	485	101	132	157	281	446	312	696	413	1055	2313	1089	1462
PCHAS_0815700	375	897	272	86	97	124	42	107	147	91	147	1665	434	171	1170	1928	2119	1310	409	138	215	173	171	167	86	226	107	51	54	87	516	85	1411	495	2559	8174	4454	2619	293	514	617	307	1164	228
PCHAS_0815800	43	30	20	16	11	8	3	15	15	6	13	61	19	5	44	79	70	54	20	21	24	46	59	90	89	93	42	36	25	32	28	20	132	78	119	156	217	125	18	16	61	61	41	37
PCHAS_0815900	224	221	403	345	189	124	72	103	187	71	47	213	88	5	106	175	123	49	178	223	897	1003	780	785	999	1766	1378	1110	780	1166	1306	902	356	314	648	694	640	375	303	157	390	817	1226	947
PCHAS_0816000	446	412	780	576	302	154	124	136	239	104	61	235	119	15	172	443	359	164	361	347	3106	2563	2297	2730	3587	4851	3930	3596	2496	2986	2978	2180	641	892	1131	888	1089	548	478	291	935	2147	2949	2735
PCHAS_0816100	66	49	73	53	64	69	52	128	174	66	70	308	17	2	47	39	22	12	16	23	107	80	58	89	111	295	553	381	165	990	2295	716	1574	1119	2144	1456	1799	863	92	179	185	98	306	85
PCHAS_0816200	280	271	401	376	214	179	123	290	370	125	164	985	200	15	303	348	291	138	227	229	628	1010	854	829	906	994	935	766	540	1000	1582	591	2051	1310	2783	2744	2643	1561	533	446	807	1257	1073	1020
PCHAS_0816300	900	849	1268	1097	883	860	693	1133	1542	599	575	1836	126	18	330	237	240	78	364	564	1271	599	489	1096	1791	3537	4641	3401	1971	5401	9632	3943	4203	3458	6795	4742	6073	2902	389	587	937	426	1607	670
PCHAS_0816400	600	818	941	873	569	558	665	871	888	614	359	1261	393	19	664	656	624	256	524	541	2327	2064	1806	1413	1779	2917	2516	1812	1414	2372	4846	1824	2544	1954	4173	2925	3540	1993	1009	705	1660	2084	3479	2458
PCHAS_0816500	189	190	299	280	192	137	114	228	324	90	131	411	86	2	113	172	121	55	125	171	745	807	640	703	941	1377	1375	1102	701	1368	1851	912	1169	983	1782	1070	1475	836	280	213	465	759	1003	848
PCHAS_0816600	222	256	414	371	210	94	78	56	85	58	21	109	42	4	103	198	147	73	223	205	962	844	776	1048	1238	1540	1619	1201	891	1347	1162	873	397	441	532	497	700	315	223	135	396	736	1013	829
PCHAS_0816700	5868	7070	11368	9150	5633	2708	2062	2590	2976	1275	752	2738	2903	95	3595	7059	5566	1963	6234	6118	13096	23001	18788	22439	29993	23900	19743	19144	12596	18257	9900	9237	3669	5292	6052	5958	8170	5255	7491	4003	13169	30424	14966	20686
PCHAS_0816800	123	122	190	180	111	67	31	51	59	21	11	66	47	2	51	135	74	34	82	103	685	863	741	741	886	1112	1146	833	616	1024	836	555	144	175	243	236	348	186	361	231	569	827	886	749
PCHAS_0816900	161	160	314	274	150	89	43	61	138	31	48	212	148	3	96	198	125	53	110	143	599	959	720	614	579	855	904	583	430	767	541	562	167	162	237	405	551	486	764	512	1224	1125	958	1043
PCHAS_0817000	852	1096	1191	1065	843	800	803	1096	1428	709	499	1326	117	28	391	392	441	182	482	746	1459	1400	1021	1291	1619	3856	3380	2710	1759	3982	5545	3050	2792	1862	4710	3155	3817	1817	233	215	499	761	1724	1128
PCHAS_0817100	134	170	122	77	52	51	26	47	60	25	35	204	64	22	144	370	269	173	83	62	145	142	100	165	204	354	311	264	183	340	426	222	206	199	329	333	317	160	23	55	58	77	148	97
PCHAS_0817200	518	557	833	719	524	552	372	692	1026	379	456	1714	282	12	356	450	304	145	316	441	1671	1724	1371	1223	1434	2790	2780	1901	1387	2942	5681	2084	3821	2184	5447	3596	4524	2392	1142	685	1777	1724	3105	2066
PCHAS_0817300	199	160	183	126	102	141	106	243	279	124	159	1680	172	24	403	332	312	129	124	138	507	681	523	441	443	637	343	328	276	305	1484	262	4297	2236	4779	12103	9081	5378	796	1233	1584	940	1188	758
PCHAS_0817400	179	227	379	299	177	132	114	117	162	119	68	271	84	4	139	228	176	60	195	194	782	836	571	540	612	964	905	676	469	739	1100	588	431	352	733	945	866	447	285	163	351	555	1124	698
PCHAS_0817500	557	613	1018	837	478	218	178	204	246	121	80	300	139	13	243	497	390	183	525	543	1893	2009	1998	2367	2680	3212	2943	2426	1783	2781	1629	1448	489	446	810	1282	1311	648	573	388	1350	2227	1936	2255
PCHAS_0817600	7	9	7	8	5	3	8	2	4	4	9	279	22	1	47	19	16	7	8	5	34	23	29	10	18	20	30	20	9	18	52	15	146	49	350	1817	920	593	70	89	167	63	287	48
PCHAS_0817700	691	759	1341	1120	563	338	230	250	402	118	93	441	340	12	387	811	564	230	636	631	2043	2446	2449	2803	3466	3249	3143	2495	2106	2996	1830	1665	664	785	907	1260	1649	888	896	495	1937	3285	2257	2614
PCHAS_0817800	197	197	302	243	200	159	126	201	272	91	74	127	17	2	32	40	28	13	53	117	145	79	53	160	352	603	1057	791	407	1494	1691	1022	403	499	755	535	876	370	69	77	124	65	152	103
PCHAS_0817900	78	54	200	165	67	35	9	5	23	7	11	61	51	1	25	71	41	12	55	78	628	828	530	511	649	874	687	549	461	503	340	294	47	76	90	104	138	98	266	127	308	597	824	645
PCHAS_0818000	106	77	118	129	77	36	30	57	71	18	20	227	156	6	88	173	133	46	53	80	1621	2638	1499	918	1515	1373	1343	1072	745	1058	1520	853	857	934	926	2076	1874	2175	3064	2516	3370	3013	3113	2579
PCHAS_0818100	461	544	742	697	441	331	308	366	546	296	192	511	242	15	330	516	447	156	357	477	2024	2292	1810	1607	1667	3586	2526	2101	1559	2716	3316	1880	1303	965	2145	1208	1620	873	939	492	1274	1883	3040	2392
PCHAS_0818200	247	291	303	383	208	326	276	537	707	272	366	1744	488	18	553	453	435	183	200	261	941	1378	993	699	683	833	764	588	433	788	2094	648	3239	1884	4184	3520	4051	2527	1684	1160	2128	1865	2030	1616
PCHAS_0818300	211	155	90	103	129	365	205	847	975	163	532	2096	93	11	299	121	148	51	32	72	144	162	139	155	160	111	332	205	80	963	2207	653	6534	4876	6309	6639	8013	3744	279	501	509	351	304	167
PCHAS_0818400	278	262	435	411	263	165	126	149	268	80	78	163	23	6	49	92	68	21	131	184	282	220	160	408	563	1015	1226	895	575	1450	1040	958	313	292	518	255	474	201	27	15	67	116	189	184
PCHAS_0818500	17	16	15	8	18	10	9	12	17	9	5	17	6	1	8	8	11	12	4	11	31	55	30	18	33	95	98	86	35	141	128	82	45	63	92	60	103	52	11	18	22	22	65	14
PCHAS_0818600	3	1	2	0	0	3	3	5	8	3	7	215	16	1	35	11	12	5	0	1	45	14	27	9	6	19	5	12	5	6	307	7	622	347	890	2216	1477	983	115	201	264	85	278	42
PCHAS_0818700	21	12	17	17	9	7	5	11	14	1	3	18	2	0	2	7	4	2	4	10	16	12	7	18	40	42	63	47	23	52	88	26	61	36	51	72	95	62	2	9	9	8	21	8
PCHAS_0818800	219	202	123	150	179	389	303	817	985	215	412	1491	71	14	200	89	127	35	34	83	115	211	130	121	124	146	605	353	112	1697	2642	1050	4170	3170	5246	4280	5453	2590	231	398	390	252	300	143
PCHAS_0818900	869	1079	1379	1281	885	480	447	587	778	320	197	1307	893	18	781	1120	833	359	697	887	2672	3757	3257	2698	3363	3937	3562	3021	1948	3526	2672	2033	917	1018	1553	2878	3302	2965	3259	2309	5028	5437	4860	4608
PCHAS_0819000	149	149	210	214	158	102	78	74	125	60	35	128	73	3	77	99	97	36	98	120	467	651	487	407	592	1035	910	753	456	988	789	602	207	239	372	409	501	335	439	277	649	712	779	613
PCHAS_0819100	156	185	246	249	150	100	91	148	222	60	60	133	18	1	44	86	70	17	94	115	463	344	411	490	639	1074	1250	851	558	1359	1710	864	511	512	845	559	818	331	69	61	174	337	496	451
PCHAS_0819200	8992	12220	10887	11426	10252	10151	10300	14538	17061	7736	5340	10566	1160	168	3427	3236	3715	1170	4142	7104	11652	13755	10466	18417	28841	38601	51078	39986	21081	70040	83091	45388	47510	53465	68572	42702	63447	33352	4053	4764	7537	11905	12416	12790
PCHAS_0819300	589	989	384	144	139	245	166	412	451	255	354	2724	586	171	1199	2322	2109	1206	442	156	512	309	344	274	108	430	219	129	125	354	5131	424	8098	4721	9916	16989	12556	8582	1105	2135	2717	736	2645	543
PCHAS_0819400	6981	11167	9639	9641	9678	6912	8857	6793	8605	6937	1748	2979	329	77	1103	843	1048	349	2093	5910	3795	1683	1154	4887	10688	23478	37781	27785	13734	43904	46692	29810	8023	12552	15046	7643	12939	6295	765	912	1278	1207	3134	1705
PCHAS_0819500	3126	4224	4226	4172	3747	2780	3181	2762	3523	2701	854	1429	183	35	569	517	545	202	1064	2312	2302	1464	899	2606	5757	10508	17159	12341	6693	20055	20613	13756	4419	7153	7514	4243	7322	3389	578	750	934	928	1868	1227
PCHAS_0819600	1849	2319	3248	2668	1828	1015	1000	937	1399	597	324	989	662	24	929	1539	1273	466	1478	1813	5672	7997	5942	5219	7436	10998	9428	8128	5386	9060	7568	6048	1744	2063	3016	2287	3532	1973	2923	1584	3811	6923	7564	6824
PCHAS_0819700	73	68	96	75	86	55	51	60	128	39	26	63	18	3	36	63	55	36	29	50	55	155	82	133	177	323	448	390	170	709	706	472	252	264	384	245	309	203	42	46	64	99	125	58
PCHAS_0819750	1156	1565	1468	1388	1355	1360	1572	1404	2111	1067	491	1231	95	22	298	214	219	102	377	781	1053	369	279	1059	2453	3941	6436	5320	2548	8770	12804	5489	2580	4336	4512	3362	5261	3125	598	787	949	407	1061	448
PCHAS_0819800	71	42	37	41	32	84	27	143	239	31	133	534	18	5	66	29	30	14	18	25	46	41	36	38	49	45	99	59	25	284	610	181	1311	814	1745	1626	1965	875	59	82	94	60	83	36
PCHAS_0819900	5	12	1	3	1	1	1	8	9	5	14	659	83	7	158	30	25	29	4	7	87	62	106	51	37	69	40	32	35	31	44	34	253	70	305	4733	2435	1810	268	365	423	153	363	128
PCHAS_0820000	377	389	668	605	345	154	119	120	231	92	51	320	239	7	279	483	333	170	382	370	1629	1481	1444	1203	1238	1853	1673	1351	999	1434	1206	926	267	261	480	862	879	736	873	505	1538	1738	2192	1953
PCHAS_0820100	861	936	1429	1260	718	310	219	187	286	156	126	1200	1063	29	876	1406	1072	463	779	849	3350	4515	4119	3623	3807	4504	3391	3037	2354	2871	1878	1664	708	905	1157	3407	3517	3687	3187	2556	5845	6458	5671	5639
PCHAS_0820200	5212	6905	8865	7341	5247	3925	4037	4473	5468	2796	1763	5211	2360	145	3861	4806	4746	1792	4722	5404	10857	16528	11472	10817	13901	18747	17203	14112	9513	17999	17854	11991	8397	7585	13229	10127	14012	8263	4742	3247	6929	14305	14723	13657
PCHAS_0820300	1478	1855	2159	1911	1664	1476	1462	2013	2654	1232	751	1575	187	25	539	573	521	159	675	1132	2538	2264	1603	2469	4268	7169	8697	6896	3998	10968	14865	7956	5688	6676	8372	4750	7502	3649	530	692	959	1382	2428	1915
PCHAS_0820400	51	88	28	9	8	14	2	13	11	7	14	359	81	17	136	221	187	116	40	7	57	19	25	16	14	27	14	9	12	19	44	9	96	40	161	2380	1070	907	208	333	336	79	323	73
PCHAS_0820500	4	5	4	1	7	4	6	8	17	8	5	16	0	1	3	4	3	2	0	6	3	2	4	5	6	6	17	21	5	41	72	25	21	20	40	41	40	32	8	12	4	0	15	6
PCHAS_0820600	765	840	986	957	901	725	635	910	1236	407	328	610	83	7	149	108	100	49	150	441	318	265	170	550	1450	2590	5065	3919	1567	8271	7665	4758	2880	3857	4664	2717	4224	2077	222	234	377	284	473	227
PCHAS_0820700	1	2	3	3	4	3	0	2	4	0	1	4	0	0	1	1	2	0	0	2	1	1	1	5	5	13	17	5	7	16	19	9	5	8	8	12	29	15	5	4	6	5	6	3
PCHAS_0820800	19	13	59	47	21	8	6	1	6	3	1	6	4	1	0	9	8	1	6	14	263	145	170	278	414	740	771	528	407	526	381	339	56	59	90	56	104	28	14	5	23	80	166	149
PCHAS_0820900	85	62	214	175	72	31	8	13	24	9	10	24	28	1	23	110	43	17	68	81	684	604	521	504	565	971	721	585	478	498	403	385	50	70	76	54	92	56	81	34	147	412	737	590
PCHAS_0821000	649	636	1049	892	563	415	329	551	822	185	276	1028	189	12	323	513	393	150	445	585	1624	1726	1845	2168	2257	3114	2811	2243	1664	3151	3650	1776	2419	1769	3471	3579	3704	1678	337	278	804	1801	1942	2094
PCHAS_0821100	91	74	20	14	20	73	52	259	175	49	216	1873	113	20	369	177	167	85	32	35	206	172	176	141	110	77	54	34	53	95	1618	141	10020	5873	8688	13918	12165	8057	624	1484	1440	750	632	375
PCHAS_0821200	0	0	0	2	1	1	0	0	3	0	0	1	0	0	0	1	0	0	1	1	7	3	0	2	2	5	3	2	1	2	12	0	5	0	6	14	20	7	4	7	6	6	12	3
PCHAS_0821300	234	276	362	352	227	135	125	110	164	126	47	140	67	6	133	286	236	105	222	259	965	1114	792	647	831	1069	1014	843	651	853	904	641	213	257	358	325	391	196	324	121	415	836	1328	1003
PCHAS_0821400	531	605	907	775	553	381	250	513	677	137	201	477	59	7	147	233	185	72	316	376	348	415	322	1039	1495	1247	1737	1279	770	2322	1287	1120	1372	1253	1713	1505	2318	899	85	78	148	371	268	331
PCHAS_0821500	151	272	138	68	47	45	23	44	50	30	31	241	118	48	281	684	710	408	132	60	68	87	60	95	101	205	127	102	77	173	138	119	64	62	178	245	162	72	20	28	21	33	89	31
PCHAS_0821600	173	187	204	209	181	99	107	160	225	40	51	115	13	1	33	27	31	12	32	84	91	66	57	235	402	655	1049	791	387	1754	1371	926	513	497	883	540	959	380	51	39	55	71	107	78
PCHAS_0821700	81	170	65	23	21	26	12	15	36	15	24	129	79	23	148	307	303	212	61	20	20	16	24	20	13	65	82	54	27	135	187	94	80	84	146	187	195	92	20	13	26	14	25	12
PCHAS_0821800	149	140	238	199	154	143	101	214	246	75	92	236	19	3	46	53	40	10	54	100	166	129	112	336	475	594	948	662	333	1424	1285	733	984	801	1321	1222	1786	708	63	69	145	110	133	129
PCHAS_0821900	142	109	108	106	136	178	142	262	405	107	153	720	46	5	90	51	69	35	15	53	180	202	131	134	208	520	1317	839	354	2461	4337	1708	3013	2171	4210	5370	5098	2555	306	458	661	234	771	200
PCHAS_0822000	1642	2048	3499	2763	1710	660	443	419	523	320	156	653	691	32	1007	1905	1551	594	1882	1908	3595	8008	5237	5786	7617	6466	5579	5066	3285	4472	2031	2448	559	832	958	1222	1554	1028	1978	1294	3128	8495	4088	5782
PCHAS_0822100	470	584	868	721	471	310	288	271	389	193	90	271	138	16	216	382	323	152	362	486	1379	1893	1305	1515	2207	2839	2747	2207	1521	2610	1875	1625	590	761	1034	707	1075	585	618	412	1015	1607	1482	1604
PCHAS_0822200	569	731	1127	944	592	316	294	226	332	280	86	132	55	9	190	420	383	142	629	604	1410	1111	753	1150	1588	2233	2043	1753	1254	1469	1334	1230	254	338	451	282	372	192	114	74	173	512	961	766
PCHAS_0822300	362	387	668	490	424	238	199	265	449	144	96	202	33	1	46	77	51	11	98	262	316	188	134	454	836	1465	2245	1599	896	2675	2442	1610	569	580	996	566	850	411	97	91	130	151	286	148
PCHAS_0822400	290	303	518	448	223	126	83	126	179	56	42	363	270	11	233	408	295	131	253	268	1282	1386	1794	1663	1599	1802	1609	1368	969	1645	1220	938	382	432	626	1347	1525	1112	1237	783	2321	2845	2115	2200
PCHAS_0822500	254	359	521	423	283	144	146	104	190	101	48	137	99	2	111	236	154	54	232	283	1397	1074	1053	1019	1341	2486	2237	1825	1268	1848	1701	1226	341	365	506	414	614	319	428	264	741	1058	1723	1348
PCHAS_0822600	214	287	439	374	245	192	155	213	340	107	107	295	30	4	75	112	76	38	174	204	451	580	390	610	901	1160	1343	985	640	1667	1506	1004	817	714	1173	889	1239	513	84	54	142	315	432	401
PCHAS_0822700	105	124	259	171	113	72	66	74	122	39	37	137	16	2	47	72	60	16	86	108	769	575	537	705	974	1503	1442	1084	801	1453	1458	884	581	437	904	606	938	339	121	87	214	413	765	575
PCHAS_0822800	374	497	604	502	323	203	174	293	316	96	79	371	165	7	246	434	389	129	268	359	713	941	1262	1562	1675	1511	1398	1078	845	1563	1072	810	629	610	921	1129	1501	719	520	320	1201	1850	986	1333
PCHAS_0822900	689	816	966	936	672	540	602	687	977	381	311	854	108	11	279	355	304	109	383	529	1215	1467	949	1465	2302	2347	3367	2217	1536	3995	3721	2507	2105	2133	2772	2288	3569	1601	588	548	868	1153	977	1030
PCHAS_0823000	256	240	449	388	226	90	67	64	138	67	42	234	228	3	171	344	223	85	202	221	1589	1627	1439	1086	1295	2068	1610	1410	1142	1271	1113	896	210	250	399	570	743	686	1280	754	1790	1885	2786	2006
PCHAS_0823100	323	438	620	530	332	206	201	264	337	127	105	300	239	16	316	418	366	142	325	344	1142	1877	1138	1052	1404	1477	1417	1197	853	1332	1012	915	466	491	723	619	983	671	815	718	1259	1891	1331	1602
PCHAS_0823200	95	46	48	24	15	10	10	7	20	8	16	71	57	12	96	128	164	73	47	26	104	400	258	188	160	196	86	78	62	69	35	51	94	82	133	172	213	145	33	53	118	224	196	113
PCHAS_0823300	3468	4302	5999	5129	3549	2012	1749	2616	3188	966	847	2049	1037	73	1750	3317	2867	973	2925	3616	6077	13156	8520	10685	15628	11616	11137	9594	6961	12293	6943	5679	4674	5902	6082	4254	6205	3625	3084	2298	4960	13666	5579	8999
PCHAS_0823400	1894	2402	3196	2759	1663	725	636	531	733	440	276	2827	2632	101	2384	3521	2896	1305	2019	2039	10236	12507	10583	7941	9462	13063	8923	8395	6390	6216	5514	4209	939	1284	1897	8777	8217	9047	9730	6211	14992	16635	19003	15354
PCHAS_0823500	339	480	227	152	88	72	30	44	84	32	65	384	177	75	426	1016	1000	550	234	116	136	99	97	120	148	285	329	217	151	255	217	167	80	95	192	252	172	110	31	54	54	67	122	59
PCHAS_0823600	405	510	682	595	418	235	226	181	242	126	64	117	24	5	57	165	124	52	250	345	627	384	335	802	1378	1676	2260	1844	1116	2343	1618	1149	286	404	521	299	599	224	68	66	95	257	343	380
PCHAS_0823700	9642	11931	20519	15892	10421	4493	3787	3364	3921	2577	876	2064	1423	118	3249	7372	6752	2148	9788	10779	15721	27991	19889	27093	36187	38440	33239	29557	18899	31194	14685	17297	3548	5227	7004	4251	6503	3361	1988	1053	4128	20106	12834	17938
PCHAS_0823800	2524	2360	4917	3904	2416	1594	1216	1888	2621	913	911	2736	958	42	1181	2406	1639	552	2027	2344	16943	16570	14168	13233	16763	28204	21916	18288	13446	19228	27759	14157	11262	11640	15887	10353	14532	7908	4797	3417	9420	14948	22234	17715
PCHAS_0823900	399	552	590	522	368	272	216	316	473	165	135	388	91	4	237	368	284	100	283	423	394	709	443	581	800	769	899	708	482	962	708	609	626	531	768	563	692	414	101	104	178	552	372	545
PCHAS_0824000	262	262	404	376	187	99	72	99	119	41	38	111	38	3	70	168	135	34	176	215	501	741	657	1252	1662	1342	1199	1047	751	1317	833	625	261	382	393	564	728	318	119	88	217	736	505	643
PCHAS_0824100	11	4	10	11	3	2	1	2	4	4	1	3	1	0	5	14	8	5	4	8	26	26	14	24	24	36	23	18	15	9	15	14	2	6	7	10	15	6	6	8	13	27	27	34
PCHAS_0824200	922	1126	1608	1422	953	549	460	535	734	326	198	567	424	10	466	808	601	251	764	850	2125	3057	2394	2179	2592	3775	3610	2819	1892	3816	2577	2417	759	798	1370	1181	1679	1072	1427	913	1809	2949	2733	3082
PCHAS_0824300	15	13	26	20	10	3	1	7	5	3	1	5	4	2	3	13	6	0	9	9	69	62	34	41	64	81	78	72	46	56	71	40	9	16	21	50	30	28	31	16	47	48	121	44
PCHAS_0824400	189	154	367	302	153	87	52	65	106	33	22	92	98	2	111	259	184	69	173	182	746	1043	854	811	890	882	965	721	538	778	464	507	120	134	217	238	329	156	267	169	445	1074	857	926
PCHAS_0824500	37	47	43	39	14	12	12	12	37	14	15	47	43	4	42	118	89	54	28	22	78	108	97	67	82	107	88	69	65	79	87	60	24	29	55	84	75	86	164	82	248	172	188	125
PCHAS_0824600	634	708	1000	969	619	346	247	501	724	121	235	1039	566	15	574	845	613	285	525	665	991	1855	1696	1795	1837	1585	1579	1172	955	1760	1074	802	1133	790	1346	1941	2385	1662	1316	985	2002	3024	1533	2087
PCHAS_0824700	85	72	42	31	19	81	67	167	165	81	114	1087	78	19	287	159	166	84	27	29	123	108	89	56	55	92	81	80	42	113	1154	111	2266	1236	2949	4114	3125	1922	159	353	387	193	486	157
PCHAS_0824800	75	46	138	93	75	47	38	50	93	26	19	102	9	1	27	23	12	6	27	37	124	48	34	141	309	506	715	580	301	815	859	554	333	292	472	448	549	255	36	20	59	38	136	62
PCHAS_0824900	8	3	7	7	2	2	2	9	13	4	2	5	7	1	11	7	8	4	11	5	50	127	62	31	30	40	22	17	9	14	22	22	13	11	12	41	38	19	4	6	33	45	130	14
PCHAS_0825000	1214	1399	1874	1439	1114	950	934	1329	1760	707	546	1131	126	18	316	292	289	88	580	880	884	860	518	1381	2562	3000	4023	3160	1533	5125	4977	3022	3040	2817	4641	3021	4026	2029	266	251	509	611	815	536
PCHAS_0825100	1040	1407	1480	1478	986	734	903	842	1050	743	307	922	579	25	750	973	886	435	780	1082	3107	2551	2262	1994	2471	4263	4089	3216	2176	4160	5295	2962	1320	1284	2313	1924	2533	1773	1762	1174	2920	3035	4947	3553
PCHAS_0825200	1113	1240	1444	1461	967	657	603	816	1160	367	308	1045	444	39	670	1193	1061	454	636	875	2486	2680	2707	2900	3439	4551	4814	3672	2453	6031	5744	3511	2149	2282	3645	3746	4260	2363	1565	1112	2861	3466	3555	3567
PCHAS_0825300	316	313	603	485	339	212	171	312	402	105	123	544	194	4	216	342	263	106	233	303	1009	2080	1497	1483	1869	1770	1793	1312	999	1877	1360	1035	1249	1027	1497	1322	1895	1142	947	786	1768	2462	1198	1749
PCHAS_0825400	175	169	332	314	157	53	53	56	102	24	25	90	105	2	85	213	147	53	150	165	1027	1353	1283	1176	1479	1517	1392	1144	830	1301	838	760	292	283	378	480	613	336	479	271	849	1656	1217	1432
PCHAS_0825500	56	29	142	80	44	20	13	35	48	6	16	87	14	1	19	63	37	9	47	38	378	352	344	371	465	584	462	417	345	430	467	256	255	189	352	348	359	217	74	44	163	289	397	360
PCHAS_0825600	480	584	708	614	404	336	316	405	480	194	154	678	117	16	301	388	369	151	316	438	1212	1165	1263	1295	1579	2183	1944	1561	1125	1959	2305	1196	1376	1165	2154	2565	2585	1545	315	310	778	1217	1525	1284
PCHAS_0825700	25	16	14	12	6	20	10	42	34	17	28	288	11	1	60	46	36	21	5	14	82	60	47	41	40	59	59	22	18	40	753	71	1516	1060	1491	2512	2196	1401	241	568	551	131	241	89
PCHAS_0825800	370	429	160	112	57	58	32	83	88	38	96	558	205	62	424	922	889	575	145	107	115	124	121	151	131	131	149	94	69	163	224	137	436	338	581	802	883	446	157	115	209	221	235	97
PCHAS_0825900	351	392	613	552	351	219	189	262	381	131	141	416	149	7	185	313	256	100	217	289	1053	1552	1285	1306	1533	1806	1855	1453	1021	2139	1638	1186	971	920	1531	1147	1746	913	597	419	940	1571	1331	1437
PCHAS_0826000	64	141	44	14	11	12	6	15	18	11	16	103	49	16	93	249	280	169	60	12	19	24	13	17	10	39	9	3	5	14	3	17	14	12	40	56	28	14	7	12	10	12	22	13
PCHAS_0826100	63	50	23	24	15	2	2	9	15	4	13	76	38	13	85	105	184	91	26	18	19	129	55	54	57	76	36	28	17	20	9	31	97	59	91	110	154	82	10	15	12	51	45	24
PCHAS_0826200	2	2	4	2	0	0	2	2	1	1	2	2	3	1	2	9	2	0	1	1	2	5	7	5	6	10	4	8	3	2	12	1	2	3	1	9	9	9	16	4	15	5	17	4
PCHAS_0826300	258	253	436	365	231	181	137	217	278	105	101	473	255	9	204	358	253	132	205	227	1023	1459	966	866	1036	1118	1100	801	649	1095	1084	753	637	538	973	1113	1452	1033	1084	741	1531	1794	1440	1497
PCHAS_0826400	113	135	215	173	123	97	108	142	196	68	67	211	27	1	78	92	71	25	75	88	342	253	336	353	378	552	640	465	347	710	866	424	482	315	787	732	862	374	83	65	173	239	383	324
PCHAS_0826500	521	604	589	600	480	358	397	339	508	207	89	221	41	10	89	108	95	54	124	352	306	224	156	453	866	1643	2845	2008	1010	3609	3338	2102	531	943	1051	792	1169	580	99	151	208	167	442	166
PCHAS_0826600	248	278	511	402	242	148	131	106	154	85	45	82	16	4	47	100	66	31	189	216	516	269	188	494	801	1158	1301	1070	676	1343	1204	801	173	247	326	319	420	244	95	71	107	156	378	240
PCHAS_0826700	520	718	729	718	483	425	474	441	663	464	213	479	114	8	245	388	298	129	351	464	1406	1101	1009	903	1024	2424	2137	1641	1192	2302	3167	1752	986	859	1893	965	1430	723	241	149	522	728	1648	1180
PCHAS_0826800	2162	3075	3256	3216	2524	2005	2195	2466	2786	1807	916	1952	202	38	727	1052	1068	412	1335	2114	3558	2483	1945	3532	5026	9508	9241	6878	4613	9744	13150	6626	4704	4222	7591	4202	6069	2837	563	498	1112	1425	3115	2543
PCHAS_0826900	41	40	57	36	27	16	13	17	14	11	12	35	33	4	42	69	74	38	37	34	188	165	149	153	159	180	185	145	99	146	166	120	56	67	83	182	222	117	243	156	406	216	467	186
PCHAS_0827000	12629	15209	25817	20492	10300	5094	3855	4259	5463	3286	2271	12313	19982	462	16769	29338	24950	9630	21760	16384	100557	97784	85503	59312	65977	98640	54829	53585	46262	32044	38909	25939	9401	11093	15726	24352	27693	25549	29585	19549	52604	95500	147245	124000
PCHAS_0827100	205	248	401	349	197	117	67	110	139	64	35	139	25	6	58	113	104	56	118	178	251	270	180	497	872	795	1050	800	535	1155	574	589	262	417	423	388	545	252	53	58	99	161	142	237
PCHAS_0827200	3067	2997	6040	4623	2452	1057	652	1153	1196	351	440	2823	3965	79	2479	5583	3980	1426	3605	3100	10200	12852	15051	17174	16221	14882	10242	9582	7147	9114	5124	4431	2035	2188	3205	7219	8059	6671	5500	2739	10154	23732	14152	17405
PCHAS_0827300	77	52	119	110	61	30	16	20	52	10	21	89	34	2	20	54	32	16	37	41	520	484	441	395	577	988	820	642	420	814	911	545	152	155	328	663	465	280	141	105	252	377	743	537
PCHAS_0827400	65	39	22	23	11	11	0	11	15	9	15	84	30	4	53	95	123	77	30	14	81	136	94	125	106	147	65	65	39	59	29	69	113	84	124	159	198	133	23	39	48	113	106	96
PCHAS_0827500	771	871	1184	1109	709	627	483	833	1033	449	482	1850	350	22	551	711	561	218	585	690	3020	2855	2611	2595	3290	5221	4674	3847	2555	4619	8908	3319	6061	5440	8317	6118	7122	4312	1369	1371	2706	3092	4514	3645
PCHAS_0827600	25	22	32	17	17	6	8	10	15	4	2	25	14	3	18	41	38	12	17	12	26	76	56	32	40	29	43	28	13	60	34	26	67	59	91	304	278	146	29	21	49	78	68	22
PCHAS_0827700	118	132	76	45	37	36	25	44	65	27	33	160	47	16	129	277	212	154	57	51	67	72	67	87	93	170	142	111	80	166	242	111	210	171	279	243	220	130	28	29	51	82	92	73
PCHAS_0827800	1042	993	1440	1145	862	1027	844	1535	2039	681	801	2402	219	27	444	542	485	176	561	735	1807	2081	1701	2254	3097	3686	4494	3639	2014	6720	8813	4059	7756	7575	10018	8069	11401	4985	716	804	1391	2006	2327	2025
PCHAS_0827900	152	128	65	67	99	282	192	571	616	143	361	1393	61	15	266	99	142	44	27	66	71	102	78	106	83	94	142	67	52	370	935	232	2149	1606	2553	2506	2893	1571	87	139	212	150	149	68
PCHAS_0828000	244	313	511	412	292	205	211	274	348	156	111	333	68	7	143	205	143	54	194	252	1015	903	757	868	952	1957	1778	1281	952	1863	2243	1271	943	677	1496	1058	1390	609	147	96	288	693	1136	995
PCHAS_0828100	296	322	468	398	247	232	201	319	419	231	164	580	55	10	163	220	171	76	221	272	792	815	594	698	1097	1547	1507	1188	781	1442	2260	1051	1375	1028	1998	1622	1815	854	151	138	242	504	913	750
PCHAS_0828200	620	750	996	825	622	550	504	803	1085	435	316	846	106	17	251	233	235	66	320	550	837	858	623	946	1352	2648	2641	2112	1338	3147	3721	2241	2188	1558	3056	1702	2314	1133	113	95	222	414	955	603
PCHAS_0828300	61	32	22	11	11	6	0	9	10	5	20	73	67	12	56	91	113	53	27	17	64	278	188	180	94	121	57	43	33	56	32	41	159	124	193	554	466	260	71	58	131	185	214	48
PCHAS_0828400	270	314	404	331	206	116	135	119	128	95	43	210	30	6	147	183	182	63	229	267	571	585	457	704	856	1091	1063	811	501	888	732	535	384	335	673	1306	1019	578	94	133	215	474	599	429
PCHAS_0828500	62	50	46	20	19	14	16	17	28	13	21	92	17	9	62	87	107	51	25	23	38	86	49	78	103	115	54	45	42	47	80	62	92	93	137	208	264	146	14	26	33	54	44	22
PCHAS_0828600	16	22	3	6	7	4	5	9	7	4	7	39	8	1	13	35	41	20	12	4	60	130	66	51	30	51	21	13	12	29	62	22	43	49	67	147	147	78	22	13	38	33	131	17
PCHAS_0828700	199	179	60	66	51	211	104	415	451	161	349	2149	177	29	437	487	391	241	81	46	199	138	122	143	77	126	72	53	42	274	2255	319	4954	2534	6564	9331	7788	4048	329	536	757	334	644	209
PCHAS_0828800	226	280	373	271	189	134	87	165	227	82	69	243	76	17	134	297	268	138	169	197	690	641	508	627	946	1450	1424	1062	806	1307	1637	881	659	621	1000	622	841	400	139	119	252	415	748	579
PCHAS_0828900	1465	1960	2280	2059	1524	1319	1430	1705	2161	1116	721	1974	273	36	704	771	760	265	935	1314	2658	3133	1958	2571	3844	6288	6624	5087	3119	7608	9755	5523	4821	3942	7521	5228	6716	3165	538	516	1090	1762	2958	2119
PCHAS_0829000	172	254	287	200	144	117	92	141	185	53	60	250	101	18	156	356	305	157	155	160	581	634	558	568	657	1113	857	740	473	895	1198	619	388	400	642	512	519	322	172	121	291	546	823	671
PCHAS_0829100	260	367	339	325	259	266	341	365	455	307	134	331	57	10	173	158	187	92	147	218	456	548	320	363	595	999	1062	822	515	1291	1932	1072	982	892	1449	974	1247	609	140	107	173	297	615	396
PCHAS_0829200	40	36	18	20	10	5	1	5	6	5	8	53	22	10	43	66	89	49	19	10	38	168	84	102	84	89	33	23	32	40	2	38	80	50	112	113	114	103	5	5	17	60	83	27
PCHAS_0829300	215	232	347	293	212	118	110	103	154	70	36	79	29	4	53	129	133	33	154	186	811	762	629	896	1251	1681	1720	1440	911	1568	1290	981	272	389	473	286	412	194	67	48	134	466	709	742
PCHAS_0829400	170	219	308	280	193	106	92	93	149	73	31	54	25	2	48	126	75	33	117	170	418	374	304	371	577	951	840	730	455	879	787	578	146	202	260	148	239	122	34	34	65	212	354	349
PCHAS_0829500	120	71	169	151	78	77	36	91	138	51	78	556	62	6	111	127	93	36	59	74	296	380	267	271	338	370	456	350	206	406	1340	323	1551	844	2283	2027	1737	1121	391	367	576	475	607	396
PCHAS_0829600	46	80	97	95	54	33	36	30	54	18	13	97	27	2	75	79	68	27	50	48	145	142	146	150	135	161	195	123	86	193	199	128	128	84	179	358	285	198	106	77	214	189	196	157
PCHAS_0829700	37	15	61	49	16	15	5	15	32	10	13	128	49	0	27	43	20	8	22	25	286	281	223	176	223	377	302	242	181	278	347	189	155	113	279	1101	616	455	189	197	296	288	562	326
PCHAS_0829800	203	190	493	341	176	63	44	33	35	28	15	35	32	6	57	182	112	52	163	241	871	965	911	1434	1853	1973	1459	1306	1046	1017	499	549	80	126	129	264	292	133	103	62	258	748	731	865
PCHAS_0829900	3	2	2	6	0	0	1	3	1	2	2	13	10	1	6	7	5	2	2	2	34	61	32	26	17	23	26	19	7	18	12	13	8	6	5	123	90	64	99	51	156	53	103	35
PCHAS_0830000	234	183	361	279	149	64	30	46	75	33	43	1208	899	19	553	727	416	220	258	210	2575	2990	2545	1198	1244	1601	1073	906	845	681	520	480	161	167	235	3253	3412	3758	5094	3167	6222	4822	6816	4569
PCHAS_0830100	361	424	560	531	373	269	236	272	427	138	100	384	124	5	179	282	229	92	238	329	926	1075	989	974	1197	1762	1903	1499	863	2077	1948	1373	775	715	1217	962	1361	748	674	421	1000	1295	1311	1160
PCHAS_0830200	290	287	485	390	285	168	126	161	272	111	70	156	11	2	45	133	85	32	179	230	536	369	284	510	757	1311	1407	1066	729	1352	1428	976	296	368	470	366	562	263	64	78	116	184	390	334
PCHAS_0830300	747	872	1244	1143	735	515	428	563	856	283	219	880	405	15	440	603	498	186	485	651	3529	3531	3275	2847	3280	5682	5645	4245	3169	5944	5935	3538	1862	1657	3132	2178	3064	1990	2404	1638	3773	4245	5354	4422
PCHAS_0830400	429	478	680	592	410	220	176	192	261	108	73	164	29	2	87	163	134	48	240	364	395	437	320	685	980	1167	1586	1167	647	1787	963	947	300	385	510	378	576	225	60	46	107	300	277	290
PCHAS_0830500	21085	29424	19405	22052	27411	29824	29089	54065	54344	17634	19108	52568	2778	573	10801	3481	5067	1805	2977	11937	5868	5191	3410	7303	18653	29073	75208	60570	20835	158970	156594	78603	215864	219178	259165	211949	271289	149714	12499	22795	23849	13165	12034	7404
PCHAS_0830600	32	34	14	21	12	23	42	47	29	12	6	113	13	5	34	32	63	29	9	16	207	317	142	231	724	893	2817	2133	802	5270	4653	2482	9305	11674	7083	7937	11084	5158	710	1750	860	445	472	194
PCHAS_0830700	436	962	308	102	91	87	25	80	113	62	129	740	461	184	871	2138	2095	1206	428	105	50	95	93	155	31	255	74	46	35	119	92	94	72	78	310	459	180	79	25	52	44	55	111	28
PCHAS_0830750	141	125	267	179	128	97	61	100	175	42	51	200	9	1	35	58	50	21	70	104	377	307	221	481	661	1144	963	863	648	1051	1274	697	575	577	910	615	855	413	82	86	164	150	277	222
PCHAS_0830800	28	18	85	45	28	19	16	15	36	6	9	66	4	0	4	14	5	6	24	17	198	114	123	255	303	570	622	477	317	639	771	449	241	189	423	384	525	154	24	32	66	62	184	124
PCHAS_0830900	52	56	64	61	48	79	74	96	123	83	67	268	15	5	65	38	40	21	25	37	70	46	35	56	90	144	166	148	75	224	736	193	637	474	974	672	688	407	68	97	144	51	152	83
PCHAS_0831000	325	701	218	81	57	60	33	31	73	36	66	537	310	126	638	1570	1447	895	254	78	52	91	97	140	80	248	102	56	49	107	53	99	72	54	264	424	151	78	13	28	31	39	107	25
PCHAS_0831100	960	1171	1768	1362	936	595	532	678	761	319	196	352	65	15	204	380	311	93	606	793	1197	1170	940	2393	3198	3820	4176	3395	2160	4954	3033	2406	1035	1065	1802	1309	2087	785	124	103	282	786	783	947
PCHAS_0831200	22	7	12	13	6	3	0	3	6	4	2	38	9	2	17	17	23	18	6	6	42	169	77	88	91	143	68	53	34	71	72	51	108	77	166	184	199	112	16	22	18	64	54	17
PCHAS_0831300	1093	826	220	426	418	2379	1780	6801	4841	2405	4915	47941	3907	509	12410	2528	3125	1575	381	683	8115	3809	4750	2517	2026	1504	1035	1033	995	1250	41318	2222	197509	104588	196048	556369	402441	282479	22427	34696	44366	23347	31125	11374
PCHAS_0831400	753	904	1417	1118	653	322	234	300	391	149	90	316	247	15	463	933	792	267	906	807	1397	2639	1891	2274	2694	2114	1899	1605	1260	1608	897	874	531	510	637	774	923	625	346	214	592	2221	1335	1827
PCHAS_0831500	77	32	37	41	22	13	7	42	36	5	55	1362	121	25	253	166	122	58	32	22	136	126	153	119	92	91	72	53	40	93	315	69	2678	989	2766	11235	6941	4274	272	507	620	411	503	207
PCHAS_0831600	388	378	631	571	365	238	158	281	444	104	142	537	179	5	220	377	239	108	276	309	998	1002	1204	1101	1173	1474	1628	1100	865	1770	1523	980	910	700	1333	1278	1499	745	444	240	916	1322	1328	1474
PCHAS_0831700	125	145	222	187	149	99	72	125	178	42	49	107	31	1	36	68	39	17	66	101	476	412	379	456	680	1142	1250	955	604	1378	1426	834	472	484	676	399	696	294	121	79	193	347	510	418
PCHAS_0831800	370	307	622	526	359	163	83	184	249	34	52	147	33	7	48	144	94	38	149	219	530	655	612	1878	2991	2506	2538	2248	1443	3280	1591	1414	741	1092	1044	755	1080	541	98	84	189	559	362	553
PCHAS_0831900	73	101	60	24	17	16	1	5	22	5	23	151	69	13	100	356	188	134	57	12	9	29	26	31	11	44	19	8	10	31	18	20	22	8	67	96	63	18	6	12	7	21	35	12
PCHAS_0832000	76	87	124	95	61	41	41	40	47	30	9	26	4	0	27	49	37	18	60	75	298	187	171	222	318	534	593	479	318	526	475	350	73	116	128	85	134	65	45	23	54	117	330	194
PCHAS_0832100	174	172	395	278	153	71	53	70	80	38	21	102	75	6	76	193	82	49	125	153	740	981	922	1018	1537	1683	1474	1306	909	1393	846	732	219	282	411	368	534	291	481	252	733	1224	900	1037
PCHAS_0832200	583	686	1120	958	570	325	280	334	437	158	136	589	450	14	460	737	542	258	509	614	2386	4397	2754	2574	3510	3333	3174	2601	1971	2964	2019	1682	783	961	1179	1337	1839	1740	2332	2070	3872	5008	3037	3547
PCHAS_0832300	3	7	21	11	10	2	6	4	6	2	1	11	5	1	6	8	11	2	3	8	418	336	340	261	330	513	495	356	285	375	429	272	97	90	134	219	246	113	274	157	281	338	632	383
PCHAS_0832400	23	23	10	15	8	8	1	2	11	3	4	10	10	0	17	38	19	21	10	22	35	43	32	43	33	41	34	34	31	17	39	21	9	6	17	39	42	19	48	24	64	48	49	47
PCHAS_0832500	516	554	914	630	485	391	400	566	636	282	265	555	60	5	145	144	139	44	251	359	547	473	301	745	1240	1566	2006	1568	909	2330	2005	1584	1532	1305	2134	1233	1903	968	98	141	178	254	294	290
PCHAS_0832600	60	65	89	79	68	45	55	34	96	37	32	180	38	6	37	52	41	25	28	33	105	84	82	101	196	316	533	397	213	730	792	478	405	383	496	1667	1177	727	140	171	198	68	305	83
PCHAS_0832700	7	2	5	0	0	1	1	0	0	0	3	12	4	0	3	12	2	7	3	1	16	36	37	27	21	38	18	4	10	17	15	16	34	18	38	86	81	32	12	14	25	20	59	13
PCHAS_0832800	65	48	54	40	22	17	3	14	21	9	10	62	44	2	43	92	81	59	34	30	130	206	133	136	149	234	198	139	137	197	169	141	65	83	115	174	190	113	39	37	76	111	173	103
PCHAS_0832900	1675	2175	2903	2462	1918	1399	1537	1811	2439	1034	660	1271	183	32	471	600	600	172	970	1497	2950	2921	2003	3227	5364	8617	9647	7573	4510	11345	11900	7710	4315	4628	7129	3815	6279	3034	396	331	657	1602	2350	2274
PCHAS_0833000	23	19	10	13	7	11	4	5	9	3	6	42	8	5	20	28	37	13	12	14	45	97	57	56	61	122	38	44	39	45	36	42	58	39	87	126	130	84	28	29	43	38	51	25
PCHAS_0833100	169	161	174	197	139	162	117	229	264	110	121	1033	123	17	275	125	98	66	68	97	324	400	267	296	429	387	683	415	274	1094	1576	531	2489	2024	2658	7499	5244	3599	615	922	943	444	936	418
PCHAS_0833200	359	456	393	370	306	385	417	681	783	293	286	1649	166	21	466	221	244	116	176	225	625	418	560	776	855	1121	1423	1029	581	2739	4073	1415	4621	2859	6466	12843	9812	5467	740	976	1347	821	1604	808
PCHAS_0833300	2801	4016	1869	2111	3429	5415	7862	8804	11133	6365	3209	5473	408	74	1493	560	969	405	411	1402	979	1047	530	636	1102	3151	11086	6430	2222	25932	41135	17766	15724	13954	26393	11264	17686	8491	635	728	1153	870	2626	984
PCHAS_0833400	1608	1610	2900	2157	1642	927	704	949	1386	497	315	688	124	13	252	541	401	131	970	1188	1862	1758	1163	2845	4920	6767	7338	6102	3331	8456	6386	5192	1580	2090	3250	1823	2845	1343	165	149	357	898	1187	1155
PCHAS_0833500	790	864	1385	1161	743	513	425	449	629	325	217	769	95	11	248	472	388	108	531	681	1678	1572	1108	1636	2356	3265	3639	2789	1840	3400	3286	2146	1578	1441	2165	2205	2741	1374	277	401	747	911	1376	1215
PCHAS_0833600	121	183	197	184	132	118	90	147	171	81	80	506	12	10	61	80	86	25	102	128	178	158	133	161	216	285	326	260	167	385	1022	263	745	549	1361	1408	1596	757	82	96	321	147	247	135
PCHAS_0833700	276	339	416	398	281	240	284	306	451	243	176	388	36	6	117	119	127	37	180	195	433	318	247	410	663	1049	1114	902	612	1327	1986	942	1051	897	1623	1076	1472	663	81	86	145	163	403	302
PCHAS_0833800	403	454	651	601	365	210	195	245	228	136	69	223	105	9	180	340	223	108	304	332	1311	1168	1252	1381	1488	2074	2114	1585	1116	2135	1603	1222	409	445	708	658	1060	443	454	255	1039	1485	1611	1351
PCHAS_0833900	1013	1276	1542	1425	974	866	787	1353	1476	554	604	1829	255	24	591	679	704	240	680	944	3641	4013	3474	4700	6618	8258	7488	6764	4163	8943	12383	5205	10189	9525	12017	10224	13183	6118	1305	1451	2552	3782	3984	3811
PCHAS_0834000	53	61	72	57	59	53	72	87	147	43	40	106	15	2	31	38	43	12	33	49	216	163	122	123	162	333	344	276	202	534	968	365	414	321	589	487	664	317	64	64	168	129	306	116
PCHAS_0834100	643	790	992	934	652	480	368	528	735	250	218	673	260	17	387	626	516	212	481	629	1456	2081	1722	1751	2062	2586	2659	2051	1431	3029	2587	1633	1160	1070	1930	1597	1987	1054	806	572	1404	2198	2012	2120
PCHAS_0834200	59	39	61	56	23	21	13	18	29	9	10	47	20	2	27	63	54	26	27	23	30	75	46	69	67	54	83	51	35	59	49	49	39	49	53	80	82	43	11	15	19	55	38	25
PCHAS_0834300	317	451	494	473	304	197	209	184	311	180	73	148	25	2	68	124	129	50	217	313	558	462	257	537	853	1266	1462	1130	782	1399	1350	937	344	480	517	398	580	276	78	66	146	253	449	320
PCHAS_0834400	223	182	328	252	164	119	96	146	252	47	46	114	21	4	49	72	68	26	79	119	310	313	262	504	667	1030	1122	860	506	1443	1097	742	473	548	748	464	659	307	49	51	113	270	284	308
PCHAS_0834500	63	34	122	87	43	20	8	16	27	4	4	18	11	0	7	23	9	4	31	35	209	164	160	248	352	592	574	423	296	523	368	315	67	93	110	79	143	68	23	13	53	138	197	191
PCHAS_0834600	313	303	317	281	297	373	294	542	783	210	274	921	59	7	127	86	101	40	76	122	213	189	153	207	359	617	1675	1035	474	2835	3664	1559	2799	2373	3953	3446	4554	1971	198	315	526	217	380	185
PCHAS_0834700	2052	2511	3177	2770	2028	1587	1786	2118	2865	1339	962	2425	381	48	916	1111	1104	382	1269	1736	4005	4685	3692	4202	5791	9510	8833	7384	4717	10242	13225	6914	6725	5546	11337	6378	8060	4194	794	696	1601	3431	4597	4150
PCHAS_0834800	291	385	500	418	353	227	239	242	319	184	63	132	25	5	73	91	98	40	127	260	458	338	247	462	649	1339	1623	1125	803	1802	1792	1244	483	446	779	366	635	305	60	42	101	184	432	279
PCHAS_0834900	139	187	261	205	117	78	98	74	82	60	34	82	28	3	71	136	126	55	122	124	280	538	300	296	539	618	553	442	298	511	364	359	184	230	277	283	341	176	99	83	162	359	313	267
PCHAS_0835000	465	609	875	715	428	261	266	331	356	177	87	204	84	4	207	330	301	123	377	502	1103	1224	851	1191	1600	1987	1867	1576	1019	1848	1412	1138	423	485	677	602	782	446	225	123	394	1024	1137	1136
PCHAS_0835100	179	187	299	244	147	69	68	74	89	49	21	86	46	2	95	222	192	55	144	157	943	718	776	621	691	1267	1036	833	639	812	721	559	137	170	230	246	317	166	243	161	428	721	1200	1006
PCHAS_0835200	881	927	1442	1184	903	481	368	565	756	211	157	377	149	8	273	514	413	159	588	810	1178	1681	1426	2229	2983	3336	3206	2803	1729	3811	2094	1981	905	1024	1474	917	1425	718	338	202	590	1665	1068	1521
PCHAS_0835300	203	194	393	304	221	166	138	187	264	106	87	183	21	3	52	56	56	12	114	158	357	175	109	377	588	1268	1320	969	688	1480	1659	1048	653	540	1040	613	958	409	49	46	102	98	340	141
PCHAS_0835400	281	315	463	371	298	253	245	349	483	187	146	441	27	4	110	80	88	34	141	210	414	232	178	502	795	1577	1659	1283	818	2016	2592	1372	1546	1074	2037	1495	2053	858	96	72	168	131	386	188
PCHAS_0835500	982	1309	1699	1404	1082	810	887	1182	1253	637	352	722	87	17	276	283	291	107	575	875	1143	1130	632	1555	2589	3971	4837	3510	2077	5689	4566	3822	2307	1837	3192	2049	3143	1437	148	138	241	416	704	589
PCHAS_0835600	680	777	1353	1134	635	351	283	324	486	174	140	385	289	4	334	750	553	199	626	683	3356	4071	2995	2643	3314	4840	3922	3271	2295	3419	3039	2279	826	866	1461	996	1475	741	1285	628	1770	3458	4108	3560
PCHAS_0835700	87	136	117	62	38	38	27	34	69	15	34	587	132	16	192	347	276	152	75	39	205	117	125	127	145	233	168	133	93	150	331	163	303	154	447	4906	2734	2192	427	548	685	197	782	207
PCHAS_0835800	433	491	640	507	304	262	228	301	414	140	141	693	201	28	273	573	490	245	319	336	1165	1898	1133	1249	1809	1772	1894	1581	1097	1957	1928	1196	1709	1416	2350	2776	2711	1486	385	396	710	1477	1326	1406
PCHAS_0835900	1383	1631	2085	1820	1179	952	1015	1050	1330	752	413	2418	711	60	1200	1511	1271	513	1118	1345	5120	4576	3982	3344	3976	6429	5753	4702	3284	5861	7400	3849	4529	2898	7085	13386	9907	6205	2613	2068	4195	5004	8601	5441
PCHAS_0836000	11	8	26	16	8	7	1	14	17	2	5	16	12	1	13	15	19	5	9	10	61	157	127	89	137	143	81	65	66	65	63	39	72	51	91	43	76	43	15	15	27	126	53	163
PCHAS_0836100	250	197	489	339	211	137	118	151	257	90	96	327	108	2	109	191	109	60	141	196	1358	1317	1106	918	1178	1999	1834	1442	1079	1841	2054	1333	817	650	1239	983	1326	686	578	410	867	1184	1854	1462
PCHAS_0836200	262	365	471	427	271	220	196	236	326	190	115	258	109	8	157	210	193	80	279	299	634	620	559	500	552	945	1006	736	494	978	1078	625	320	283	623	443	605	299	248	102	453	604	813	694
PCHAS_0836300	581	644	1089	909	508	290	209	312	439	128	140	486	368	12	357	731	525	195	508	552	1376	2505	1962	2302	3175	2609	2039	1903	1378	2174	1298	1076	879	1026	1214	1326	1795	1277	967	833	1870	3330	1598	2193
PCHAS_0836400	305	338	456	456	272	280	208	325	462	211	182	634	111	13	244	331	251	84	214	299	907	955	657	594	817	1423	1124	970	656	1202	2228	914	1322	1087	2052	1683	2028	1205	1016	709	1179	768	1500	812
PCHAS_0836500	1669	2218	2909	2669	1375	618	475	359	426	424	387	10396	8187	153	6866	5474	4761	2724	2771	2390	12778	13938	12244	7774	8148	8281	5299	5670	4513	2974	2473	2258	810	1146	1194	31123	28103	33669	23186	15596	34195	29913	33665	22857
PCHAS_0836600	322	239	134	168	254	601	447	1273	1514	373	657	2777	141	11	440	138	152	75	59	111	357	233	236	188	179	274	981	662	208	3365	7657	2065	10767	8464	13301	15343	15235	8379	901	1819	2203	798	1166	515
PCHAS_0836700	2164	3049	3059	3104	2862	1822	2062	1475	2132	1573	455	688	116	25	319	196	220	116	432	1676	619	365	201	1006	3134	8013	13134	9997	5113	14321	12510	9641	1960	3398	3486	1482	2725	1366	198	177	328	286	649	340
PCHAS_0836800	32	26	39	29	23	15	12	9	14	12	29	774	414	7	283	111	73	65	18	24	595	408	336	149	189	211	133	124	92	83	161	100	96	77	160	4008	3064	3548	1924	1429	1937	987	2654	948
[truncated: 3,365 more rows]
