# Supplementary material for: Analysis of pir gene expression across the Plasmodium life cycle
Source: Malar J. 2021 Nov 25;20:445. doi: 10.1186/s12936-021-03979-6 (PMC8614022; doi:10.1186/s12936-021-03979-6)
Supplement: Supplementary file 6 — Additional file 6. P.c. chabaudi parasitaemia, pir gene information, TPM values, summed across loci, and z-scores. [file 12936_2021_3979_MOESM6_ESM.xlsx]

## Sheet: Parasitaemia d7
Differential Count	Giemsa stained thin blood films were microscopically examined; 200-300 infected red blood cells were counted for each sample. For total parasitaemia the % parasitaemia was the proportion of iRBC/200 rbc
Time	Mouse		Rings	Trophs	Schzts	Gametes	Total iRBC		% R	% T	% Sch	% Gam		Total parasitaemia (%)
1400h	1		27	177	0	0	204		13.2353	86.7647	0	0		2.6
	2		50	146	5	1	202		24.7525	72.2772	2.47525	0.49505		4.8
	3		33	176	2	1	212		15.566	83.0189	0.943396	0.471698		5.85
1700h	1		177	41	0	0	218		81.1927	18.8073	0	0		5.7
	2		146	54	0	0	200		73	27	0	0		1.04
	3		145	60	3	1	209		69.378	28.7081	1.43541	0.478469		3.5
2000h	1		257	41	1	0	299		85.9532	13.7124	0.334448	0		8
	2		185	29	1	0	215		86.0465	13.4884	0.465116	0		7.9
	3		189	39	1	1	230		82.1739	16.9565	0.434783	0.434783		4.4
2300h	1		201	13	0	0	214		93.9252	6.07477	0	0		0.85
	2		151	65	0	0	216		69.9074	30.0926	0	0		3.41
	3		171	48	0	1	220		77.7273	21.8182	0	0.454545		7.05
0200h	1		168	58	0	1	227		74.0088	25.5507	0	0.440529		4.5
	2		177	47	0	0	224		79.0179	20.9821	0	0		6.8
	3		/	/	/	/	/							/
0500h	1		99	123	0	0	222		44.5946	55.4054	0	0		4.95
	2		103	105	0	0	208		49.5192	50.4808	0	0		2.1
	3		87	130	0	1	218		39.9083	59.633	0	0.458716		6.25
0800h	1		20	215	2	0	237		8.43882	90.7173	0.843882	0		9.3
	2		22	191	0	1	214		10.2804	89.2523	0	0.46729		6.5
	3		31	203	0	0	234		13.2479	86.7521	0	0		9
1100h	1		10	211	0	1	222		4.5045	95.045	0	0.45045		10.1
	2		13	209	0	0	222		5.85586	94.1441	0	0		4.8
	3		12	200	0	0	212		5.66038	94.3396	0	0		2.83

## Sheet: pir_gene_info
Gene.ID	Product.Description	Transcript.Length	Geneid	chrom	subfam	SorL	subtelomere	chapl_aapl	chapl_aapl_name
PCHAS_0100200	PIR protein	894	PCHAS_0100200	01	S1	S	1L
PCHAS_0100300	PIR protein	903	PCHAS_0100300	01	S7	S	1L
PCHAS_0100400	PIR protein	2061	PCHAS_0100400	01	L1	L	1L
PCHAS_0100800	PIR protein	450	PCHAS_0100800	01	L1	L	1L
PCHAS_0101200	PIR protein	1056	PCHAS_0101200	01	ancestral	ancestral	1L
PCHAS_0113300	PIR protein	3342	PCHAS_0113300	01	L1	L	1R
PCHAS_0114500	PIR protein	891	PCHAS_0114500	01	L4	L	1R
PCHAS_0114800	PIR protein	3228	PCHAS_0114800	01	L1	L	1R
PCHAS_0114900	PIR protein	1827	PCHAS_0114900	01	L1	L	1R
PCHAS_0115000	PIR protein	1686	PCHAS_0115000	01	L4	L	1R
PCHAS_0115100	PIR protein	960	PCHAS_0115100	01	S7	S	1R
PCHAS_0115200	PIR protein	918	PCHAS_0115200	01	S1	S	1R
PCHAS_0115300	PIR protein	903	PCHAS_0115300	01	S7	S	1R
PCHAS_0200005	PIR protein	879	PCHAS_0200005	02	S7	S	2L
PCHAS_0200011	PIR protein	1059	PCHAS_0200011	02	L4	L	2L	AAPL	2L_AAPL
PCHAS_0200015	PIR protein	909	PCHAS_0200015	02	S7	S	2L	AAPL	2L_AAPL
PCHAS_0200021	PIR protein	912	PCHAS_0200021	02	S1	S	2L	AAPL	2L_AAPL
PCHAS_0200025	PIR protein	924	PCHAS_0200025	02	S7	S	2L	AAPL	2L_AAPL
PCHAS_0200031	PIR protein	936	PCHAS_0200031	02	L4	L	2L	AAPL	2L_AAPL
PCHAS_0200035	PIR protein	3009	PCHAS_0200035	02	L1	L	2L
PCHAS_0200055	PIR protein	2847	PCHAS_0200055	02	L1	L	2L
PCHAS_0213821	PIR protein	1860	PCHAS_0213821	02	L1	L	2R
PCHAS_0213841	PIR protein	858	PCHAS_0213841	02	S7	S	2R
PCHAS_0213861	PIR protein	900	PCHAS_0213861	02	S7	S	2R
PCHAS_0300200	PIR protein	882	PCHAS_0300200	03	S7	S	3L
PCHAS_0300300	PIR protein	846	PCHAS_0300300	03	S7	S	3L
PCHAS_0300400	PIR protein	918	PCHAS_0300400	03	S7	S	3L
PCHAS_0300600	PIR protein	954	PCHAS_0300600	03	S7	S	3L
PCHAS_0300700	PIR protein	1737	PCHAS_0300700	03	L1	L	3L
PCHAS_0300800	PIR protein	960	PCHAS_0300800	03	S7	S	3L
PCHAS_0300900	PIR protein	951	PCHAS_0300900	03	L4	L	3L	ChAPL	3L_ChAPL
PCHAS_0301100	PIR protein	942	PCHAS_0301100	03	L4	L	3L	ChAPL	3L_ChAPL
PCHAS_0301200	PIR protein	1080	PCHAS_0301200	03	L4	L	3L	ChAPL	3L_ChAPL
PCHAS_0301400	PIR protein	2946	PCHAS_0301400	03	L1	L	3L	ChAPL	3L_ChAPL
PCHAS_0301500	PIR protein	1686	PCHAS_0301500	03	L1	L	3L	ChAPL	3L_ChAPL
PCHAS_0301600	PIR protein	2442	PCHAS_0301600	03	L1	L	3L	ChAPL	3L_ChAPL
PCHAS_0301700	PIR protein	4662	PCHAS_0301700	03	L1	L	3L	ChAPL	3L_ChAPL
PCHAS_0301800	PIR protein	2121	PCHAS_0301800	03	L4	L	3L	ChAPL	3L_ChAPL
PCHAS_0301900	PIR protein	2259	PCHAS_0301900	03	L1	L	3L	ChAPL	3L_ChAPL
PCHAS_0302000	PIR protein	3864	PCHAS_0302000	03	L1	L	3L	ChAPL	3L_ChAPL
PCHAS_0302100	PIR protein	960	PCHAS_0302100	03	L4	L	3L	ChAPL	3L_ChAPL
PCHAS_0302700	PIR protein	1302	PCHAS_0302700	03	L1	L	3L
PCHAS_0318500	PIR protein	1107	PCHAS_0318500	03	L2	L	3R
PCHAS_0319100	PIR protein	1101	PCHAS_0319100	03	L2	L	3R
PCHAS_0319400	PIR protein	1446	PCHAS_0319400	03	L1	L	3R
PCHAS_0319600	PIR protein	936	PCHAS_0319600	03	L4	L	3R	AAPL	3R_AAPL
PCHAS_0319700	PIR protein	927	PCHAS_0319700	03	S7	S	3R	AAPL	3R_AAPL
PCHAS_0319800	PIR protein	912	PCHAS_0319800	03	S7	S	3R	AAPL	3R_AAPL
PCHAS_0319900	PIR protein	921	PCHAS_0319900	03	S7	S	3R	AAPL	3R_AAPL
PCHAS_0320000	PIR protein	1791	PCHAS_0320000	03	S7	S	3R	AAPL	3R_AAPL
PCHAS_0320100	PIR protein	1065	PCHAS_0320100	03	L4	L	3R	AAPL	3R_AAPL
PCHAS_0320200	PIR protein	921	PCHAS_0320200	03	S1	S	3R	AAPL	3R_AAPL
PCHAS_0320300	PIR protein	921	PCHAS_0320300	03	S7	S	3R
PCHAS_0320400	PIR protein	957	PCHAS_0320400	03	S7	S	3R
PCHAS_0400101	PIR protein	939	PCHAS_0400101	04	S7	S	4L
PCHAS_0400111	PIR protein	921	PCHAS_0400111	04	S1	S	4L	AAPL	4L_AAPL
PCHAS_0400121	PIR protein	1083	PCHAS_0400121	04	L4	L	4L	AAPL	4L_AAPL
PCHAS_0400200	PIR protein	1719	PCHAS_0400200	04	S7	S	4L	AAPL	4L_AAPL
PCHAS_0400300	PIR protein	948	PCHAS_0400300	04	S7	S	4L	AAPL	4L_AAPL
PCHAS_0400400	PIR protein	915	PCHAS_0400400	04	S7	S	4L	AAPL	4L_AAPL
PCHAS_0400500	PIR protein	981	PCHAS_0400500	04	L4	L	4L	AAPL	4L_AAPL
PCHAS_0400600	PIR protein	1422	PCHAS_0400600	04	L1	L	4L
PCHAS_0400800	PIR protein	2697	PCHAS_0400800	04	L1	L	4L
PCHAS_0401100	PIR protein	942	PCHAS_0401100	04	L4	L	4L
PCHAS_0401400	conserved Plasmodium chabaudi protein, unknown function	684	PCHAS_0401400	04	unk	unk	4L
PCHAS_0419500	PIR protein	1947	PCHAS_0419500	04	L1	L	4R
PCHAS_0419600	PIR protein	1959	PCHAS_0419600	04	L1	L	4R
PCHAS_0419700	PIR protein	1992	PCHAS_0419700	04	L1	L	4R
PCHAS_0419800	PIR protein	2241	PCHAS_0419800	04	L1	L	4R
PCHAS_0419900	PIR protein	3030	PCHAS_0419900	04	L1	L	4R
PCHAS_0420000	PIR protein	1320	PCHAS_0420000	04	L1	L	4R
PCHAS_0420100	PIR protein	3714	PCHAS_0420100	04	L1	L	4R
PCHAS_0420200	PIR protein	3216	PCHAS_0420200	04	L1	L	4R
PCHAS_0420300	PIR protein	951	PCHAS_0420300	04	L4	L	4R
PCHAS_0420700	PIR protein	1977	PCHAS_0420700	04	L1	L	4R
PCHAS_0500200	PIR protein	933	PCHAS_0500200	05	S7	S	5L
PCHAS_0500400	PIR protein	3117	PCHAS_0500400	05	L1	L	5L
PCHAS_0500600	PIR protein	858	PCHAS_0500600	05	S7	S	5L
PCHAS_0500700	PIR protein	918	PCHAS_0500700	05	L4	L	5L
PCHAS_0525411	PIR protein	930	PCHAS_0525411	05	S7	S	5R
PCHAS_0525421	PIR protein	915	PCHAS_0525421	05	S3	S	5R
PCHAS_0600200	PIR protein	984	PCHAS_0600200	06	S7	S	6L
PCHAS_0600300	PIR protein	879	PCHAS_0600300	06	L4	L	6L
PCHAS_0600500	PIR protein	984	PCHAS_0600500	06	L4	L	6L
PCHAS_0600600	PIR protein	945	PCHAS_0600600	06	L4	L	6L
PCHAS_0600700	PIR protein	2928	PCHAS_0600700	06	L1	L	6L
PCHAS_0600800	PIR protein	4443	PCHAS_0600800	06	L1	L	6L	ChAPL	6L_ChAPL
PCHAS_0600900	PIR protein	2277	PCHAS_0600900	06	L1	L	6L	ChAPL	6L_ChAPL
PCHAS_0601000	PIR protein	3780	PCHAS_0601000	06	L1	L	6L	ChAPL	6L_ChAPL
PCHAS_0601100	PIR protein	3342	PCHAS_0601100	06	L1	L	6L	ChAPL	6L_ChAPL
PCHAS_0601200	PIR protein	1878	PCHAS_0601200	06	L1	L	6L	ChAPL	6L_ChAPL
PCHAS_0601300	PIR protein	2082	PCHAS_0601300	06	L1	L	6L	ChAPL	6L_ChAPL
PCHAS_0601400	PIR protein	951	PCHAS_0601400	06	L4	L	6L
PCHAS_0601600	PIR protein	3552	PCHAS_0601600	06	L1	L	6L
PCHAS_0602000	hypothetical protein, pseudogene	990	PCHAS_0602000	06	unk	unk	6L
PCHAS_0626200	PIR protein	2148	PCHAS_0626200	06	L1	L	6R	ChAPL	6R_ChAPL
PCHAS_0626300	PIR protein	1746	PCHAS_0626300	06	L1	L	6R	ChAPL	6R_ChAPL
PCHAS_0626400	PIR protein	2985	PCHAS_0626400	06	L1	L	6R	ChAPL	6R_ChAPL
PCHAS_0626500	PIR protein	4155	PCHAS_0626500	06	L1	L	6R	ChAPL	6R_ChAPL
PCHAS_0626600	PIR protein	2319	PCHAS_0626600	06	L1	L	6R	ChAPL	6R_ChAPL
PCHAS_0626700	PIR protein	1986	PCHAS_0626700	06	L4	L	6R	ChAPL	6R_ChAPL
PCHAS_0626800	PIR protein	4338	PCHAS_0626800	06	L1	L	6R	ChAPL	6R_ChAPL
PCHAS_0626900	PIR protein	945	PCHAS_0626900	06	L4	L	6R	ChAPL	6R_ChAPL
PCHAS_0627100	PIR protein	951	PCHAS_0627100	06	L4	L	6R	ChAPL	6R_ChAPL
PCHAS_0627200	PIR protein	960	PCHAS_0627200	06	S7	S	6R
PCHAS_0700200	PIR protein	975	PCHAS_0700200	07	S7	S	7L
PCHAS_0700300	PIR protein	933	PCHAS_0700300	07	S1	S	7L
PCHAS_0700400	PIR protein	1620	PCHAS_0700400	07	L1	L	7L
PCHAS_0700500	PIR protein	894	PCHAS_0700500	07	S7	S	7L
PCHAS_0700600	PIR protein	1887	PCHAS_0700600	07	L1	L	7L
PCHAS_0700700	PIR protein	3735	PCHAS_0700700	07	L1	L	7L
PCHAS_0700900	PIR protein, pseudogene	885	PCHAS_0700900	07	S7	S	7L
PCHAS_0701000	PIR protein	1074	PCHAS_0701000	07	L4	L	7L
PCHAS_0701300	PIR protein	894	PCHAS_0701300	07	S7	S	7L
PCHAS_0701400	PIR protein	5715	PCHAS_0701400	07	L4	L	7L
PCHAS_0701600	PIR protein	903	PCHAS_0701600	07	S7	S	7L
PCHAS_0701700	PIR protein	3246	PCHAS_0701700	07	L1	L	7L
PCHAS_0731300	PIR protein	2118	PCHAS_0731300	07	L1	L	7R
PCHAS_0731500	PIR protein	2052	PCHAS_0731500	07	L1	L	7R
PCHAS_0731600	PIR protein	909	PCHAS_0731600	07	S7	S	7R
PCHAS_0731800	PIR protein	933	PCHAS_0731800	07	S7	S	7R
PCHAS_0731900	PIR protein	906	PCHAS_0731900	07	S1	S	7R
PCHAS_0732000	PIR protein	930	PCHAS_0732000	07	S7	S	7R
PCHAS_0800005	PIR protein	939	PCHAS_0800005	08	S7	S	8L
PCHAS_0800011	PIR protein	879	PCHAS_0800011	08	S7	S	8L
PCHAS_0800015	PIR protein	915	PCHAS_0800015	08	S7	S	8L
PCHAS_0800025	PIR protein	1371	PCHAS_0800025	08	L1	L	8L
PCHAS_0800035	PIR protein	3159	PCHAS_0800035	08	L1	L	8L
PCHAS_0800051	PIR protein	897	PCHAS_0800051	08	S1	S	8L
PCHAS_0800055	PIR protein	1845	PCHAS_0800055	08	L1	L	8L
PCHAS_0836900	PIR protein	1962	PCHAS_0836900	08	L1	L	8R
PCHAS_0837200	PIR protein	3801	PCHAS_0837200	08	L1	L	8R
PCHAS_0837600	PIR protein	927	PCHAS_0837600	08	L4	L	8R
PCHAS_0837800	PIR protein	2928	PCHAS_0837800	08	L1	L	8R
PCHAS_0838000	PIR protein	918	PCHAS_0838000	08	S7	S	8R
PCHAS_0900001	PIR protein	942	PCHAS_0900001	09	L4	L	9L
PCHAS_0900005	PIR protein	1725	PCHAS_0900005	09	S7	S	9L
PCHAS_0900011	PIR protein	921	PCHAS_0900011	09	S7	S	9L
PCHAS_0900015	PIR protein	912	PCHAS_0900015	09	S7	S	9L
PCHAS_0900021	PIR protein	1371	PCHAS_0900021	09	L1	L	9L
PCHAS_0900031	PIR protein	3561	PCHAS_0900031	09	L1	L	9L
PCHAS_0900041	PIR protein	858	PCHAS_0900041	09	S1	S	9L
PCHAS_0900045	PIR protein	1089	PCHAS_0900045	09	L4	L	9L
PCHAS_0900100	PIR protein	3288	PCHAS_0900100	09	L1	L	9L
PCHAS_0900300	PIR protein, pseudogene	2367	PCHAS_0900300	09	L1	L	9L
PCHAS_0938200	PIR protein, pseudogene	906	PCHAS_0938200	09	S7	S	9R
PCHAS_0938341	PIR protein	951	PCHAS_0938341	09	S7	S	9R
PCHAS_1000300	PIR protein	924	PCHAS_1000300	10	S3	S	10L
PCHAS_1000400	PIR protein	927	PCHAS_1000400	10	S7	S	10L
PCHAS_1000600	PIR protein	3228	PCHAS_1000600	10	L1	L	10L
PCHAS_1001100	PIR protein	4470	PCHAS_1001100	10	L1	L	10L
PCHAS_1001351	CIR protein, fragment	423	PCHAS_1001351	10	L1	L	10L
PCHAS_1041100	PIR protein	1125	PCHAS_1041100	10	L1	L	10R
PCHAS_1042000	PIR protein	1371	PCHAS_1042000	10	L1	L	10R
PCHAS_1042300	PIR protein	918	PCHAS_1042300	10	S7	S	10R
PCHAS_1042500	PIR protein	921	PCHAS_1042500	10	S7	S	10R
PCHAS_1042600	PIR protein	927	PCHAS_1042600	10	S7	S	10R
PCHAS_1042700	PIR protein	417	PCHAS_1042700	10	S7	S	10R
PCHAS_1100200	PIR protein	846	PCHAS_1100200	11	S7	S	11L
PCHAS_1100300	PIR protein	1911	PCHAS_1100300	11	L1	L	11L
PCHAS_1146000	PIR protein	3528	PCHAS_1146000	11	L1	L	11R
PCHAS_1146400	PIR protein	1026	PCHAS_1146400	11	L4	L	11R
PCHAS_1147000	PIR protein	3729	PCHAS_1147000	11	L1	L	11R
PCHAS_1147200	PIR protein	1371	PCHAS_1147200	11	L1	L	11R
PCHAS_1147300	PIR protein	921	PCHAS_1147300	11	S3	S	11R
PCHAS_1147400	PIR protein	930	PCHAS_1147400	11	S1	S	11R
PCHAS_1147500	PIR protein	921	PCHAS_1147500	11	S7	S	11R
PCHAS_1147521	PIR protein	921	PCHAS_1147521	11	S7	S	11R
PCHAS_1200200	PIR protein	930	PCHAS_1200200	12	S7	S	12L	AAPL	12L_AAPL
PCHAS_1200300	PIR protein	954	PCHAS_1200300	12	L4	L	12L	AAPL	12L_AAPL
PCHAS_1200400	PIR protein	987	PCHAS_1200400	12	S7	S	12L	AAPL	12L_AAPL
PCHAS_1200500	PIR protein	915	PCHAS_1200500	12	S7	S	12L	AAPL	12L_AAPL
PCHAS_1200600	PIR protein	912	PCHAS_1200600	12	S7	S	12L	AAPL	12L_AAPL
PCHAS_1200700	PIR protein	882	PCHAS_1200700	12	S7	S	12L	AAPL	12L_AAPL
PCHAS_1247000	conserved rodent malaria protein, unknown function	756	PCHAS_1247000	12	unk	unk	12R
PCHAS_1247400	PIR protein	1968	PCHAS_1247400	12	L4	L	12R
PCHAS_1247500	PIR protein	948	PCHAS_1247500	12	S7	S	12R
PCHAS_1248000	PIR protein	2082	PCHAS_1248000	12	L1	L	12R
PCHAS_1248300	PIR protein	2613	PCHAS_1248300	12	L1	L	12R
PCHAS_1300101	PIR protein	843	PCHAS_1300101	13	S7	S	13L
PCHAS_1300201	PIR protein	861	PCHAS_1300201	13	S7	S	13L
PCHAS_1300301	PIR protein	927	PCHAS_1300301	13	S1	S	13L
PCHAS_1300401	PIR protein	954	PCHAS_1300401	13	S7	S	13L
PCHAS_1300601	PIR protein	2394	PCHAS_1300601	13	L1	L	13L
PCHAS_1301700	PIR protein	2775	PCHAS_1301700	13	L1	L	13L
PCHAS_1302200	PIR protein	2421	PCHAS_1302200	13	L1	L	13L
PCHAS_1302800	PIR protein	3570	PCHAS_1302800	13	L1	L	13L
PCHAS_1303500	PIR protein	1914	PCHAS_1303500	13	L1	L	13L
PCHAS_1370300	PIR protein	3297	PCHAS_1370300	13	L1	L	13R
PCHAS_1370900	PIR protein	3771	PCHAS_1370900	13	L1	L	13R
PCHAS_1371100	PIR protein	1491	PCHAS_1371100	13	L1	L	13R	AAPL	13R_AAPL
PCHAS_1371200	PIR protein	933	PCHAS_1371200	13	S7	S	13R	AAPL	13R_AAPL
PCHAS_1371300	PIR protein	909	PCHAS_1371300	13	S7	S	13R	AAPL	13R_AAPL
PCHAS_1371400	PIR protein	924	PCHAS_1371400	13	S7	S	13R	AAPL	13R_AAPL
PCHAS_1371500	PIR protein	960	PCHAS_1371500	13	S1	S	13R	AAPL	13R_AAPL
PCHAS_1371600	PIR protein	1692	PCHAS_1371600	13	S7	S	13R	AAPL	13R_AAPL
PCHAS_1371700	PIR protein	912	PCHAS_1371700	13	S7	S	13R
PCHAS_1371900	PIR protein	945	PCHAS_1371900	13	S7	S	13R
PCHAS_1400200	PIR protein	969	PCHAS_1400200	14	S7	S	14L
PCHAS_1400300	PIR protein	918	PCHAS_1400300	14	S1	S	14L
PCHAS_1400400	PIR protein	927	PCHAS_1400400	14	S1	S	14L
PCHAS_1400700	PIR protein	930	PCHAS_1400700	14	L4	L	14L
PCHAS_1400900	PIR protein	861	PCHAS_1400900	14	S7	S	14L
PCHAS_1401300	PIR protein	867	PCHAS_1401300	14	S1	S	14L
PCHAS_1401400	PIR protein	1863	PCHAS_1401400	14	L1	L	14L
PCHAS_1467700	PIR protein	3432	PCHAS_1467700	14	L1	L	14R
PCHAS_1467900	PIR protein	3576	PCHAS_1467900	14	L1	L	14R
PCHAS_1468400	PIR protein, pseudogene	861	PCHAS_1468400	14	S1	S	14R
PCHAS_1468500	PIR protein	1083	PCHAS_1468500	14	L4	L	14R
PCHAS_1468600	PIR protein	1770	PCHAS_1468600	14	L1	L	14R
PCHAS_1468700	PIR protein	936	PCHAS_1468700	14	L4	L	14R

## Sheet: chab_TPM_bioreps
Geneid	02h_Late.Rings_1	02h_Late.Rings_2	05h_Rings.Troph.conversion_1	05h_Rings.Troph.conversion_2	05h_Rings.Troph.conversion_3	08h_Early.Trophs_1	08h_Early.Trophs_2	11h_Mid.Trophs_1	11h_Mid.Trophs_2	11h_Mid.Trophs_3	14h_Late.Trophs_1	14h_Late.Trophs_2	17h_Early.Rings_1	17h_Early.Rings_2	17h_Early.Rings_3	20h_Early.Mid.Rings_1	20h_Early.Mid.Rings_2	20h_Early.Mid.Rings_3	23h_Late.Mid.Rings_1	23h_Late.Mid.Rings_2
PCHAS_0100100	72.8339	79.6592	75.166	57.5911	42.7464	39.9474	40.2556	29.08	45.9793	32.4336	624.522	100.749	838.159	440.353	628.827	193.881	313.771	193.153	84.1469	90.4628
PCHAS_0100200	0.407574	0.783713	0	0.533678	0.154203	0.353943	0	2.913	1.32692	3.64001	3.91295	4.18205	1.0145	8.23678	0.69454	1.38105	2.65213	1.00566	0.291076	0.262567
PCHAS_0100300	0	0	0	0	0	0.350416	0	0.240331	0	0.600621	0.203892	0.690062	0	0	0	0	0	0	0	0.259951
PCHAS_0100400	0.883967	1.24649	0.550193	1.15747	0.401331	3.0706	1.88973	3.26423	2.30231	3.28943	1.60799	2.72107	0	3.57287	0.903812	0.479248	0.575208	0.109056	0.37878	1.13894
PCHAS_0100500	46.0904	69.4807	54.3493	38.5934	31.1339	17.5219	30.6588	16.2587	30.9125	43.2829	2231.36	292.281	4880.94	847.502	2204.57	633.82	1236.35	694.549	148.617	108.83
PCHAS_0100600	1.27899	1.03232	0.463318	0.496212	0.358443	0.658191	1.18145	2.59565	0.514069	1.83325	3.35102	2.26827	0.707456	5.7439	1.37229	1.15569	1.54122	0.759734	0.202981	0.610336
PCHAS_0100651	1.7228	2.7606	3.44665	0.563957	2.60723	0.748051	2.30185	1.02609	1.86961	3.20544	0.870518	4.41933	1.07206	0	0	2.91882	2.80261	5.84494	3.0759	2.21972
PCHAS_0100700	8.11718	24.665	29.1373	13.3842	22.9762	3.13292	6.42694	7.87857	5.22009	5.81741	101.476	14.3957	155.65	12.1513	38.9355	23.2263	22.4972	45.2496	17.6057	13.9447
PCHAS_0100800	4.85828	4.15194	8.27963	4.24096	4.28889	2.81267	7.9337	8.68075	2.63615	6.02624	12.6834	5.5389	6.04639	0	3.44955	4.38991	1.31723	7.49215	3.46962	4.69471
PCHAS_0100900	234.55	251.96	245.899	250.696	227.286	195.792	206.656	178.25	185.477	148.581	370.618	134.948	286.932	301.308	326.881	215.634	227.162	235.98	211.398	230.05
PCHAS_0101000	47.9304	53.4004	54.2207	54.3811	46.0474	39.4442	50.7405	41.5504	29.1392	44.6365	45.5214	37.3361	63.0874	35.4998	40.1972	34.1828	33.4749	49.8445	37.2769	48.499
PCHAS_0101100	0.588645	1.13189	0.523401	0.256924	0.148473	0	0.699107	0.350596	0	0.292063	46.6979	3.69111	16.3614	27.7575	19.7276	2.12758	5.10717	3.51005	0.28026	0.88484
PCHAS_0101200	336.94	404.725	361.415	369.352	288.378	415.308	561.219	695.036	380.818	629.673	1066.5	863.289	638.994	383.525	540.658	357.771	345.772	403.129	269.093	340.989
PCHAS_0101300	1170.51	1180.07	919.934	1113.25	736.64	3934.09	3795.77	4848.96	5482.06	5338.18	6070.17	7919.53	861.796	1840.92	2221.17	907.928	718.048	687.542	577.036	943.712
PCHAS_0101400	8616.44	7208.19	8290.28	7711.09	8474.1	5826.53	5572.02	3488.47	5384.99	3424.07	7501.05	3646.38	17949.4	8696.5	12764.4	12170.3	13294.9	11694.6	10951.7	9325.01
PCHAS_0101500	10.3981	14.0576	6.9148	7.43693	7.57058	5.53934	8.09455	8.3789	4.07749	9.5596	9.58102	8.81641	9.89608	24.7222	11.0187	18.3571	20.1848	16.9247	7.738	7.09272
PCHAS_0101600	34.2126	37.4204	44.0243	33.1222	36.9679	17.2803	21.2361	22.9206	11.9177	22.3539	29.8321	16.6937	74.7622	24.6594	45.9051	48.0888	54.9692	57.0306	41.7615	36.2201
PCHAS_0101700	198.643	201.456	222.585	214.577	222.396	121.578	155.261	106.301	108.666	87.6334	48.254	77.6926	87.1189	46.8427	110.596	147.971	133.482	167.001	198.311	216.219
PCHAS_0101800	0.19097	0.489615	0.509411	0.500113	0.289009	0.331683	0.68042	0.909932	0.414488	1.13703	1.54394	0.653172	0	0	0.976288	0.258839	0.621333	0.235602	0.272769	0.246054
PCHAS_0101900	52.5883	53.9973	58.3059	57.6082	52.8453	42.19	46.3822	48.1751	26.5017	43.8505	18.2156	30.9353	9.00527	13.0562	16.2936	25.744	24.5929	25.2661	40.6019	49.4443
PCHAS_0102000	55.2078	67.7386	67.7424	60.7228	68.0335	51.2308	57.887	53.3622	41.7675	49.3056	24.0704	45.3183	9.03033	12.751	16.6654	27.1519	18.9886	28.0226	43.9335	58.9379
PCHAS_0102100	53.24	65.9479	63.7116	59.9071	61.1664	38.1278	52.9969	68.4904	24.9365	61.0767	48.0502	54.734	28.3425	35.2428	31.8151	38.5832	33.3756	42.966	45.5681	52.8683
PCHAS_0102200	9.96639	10.0505	6.61677	5.046	6.13369	2.53879	4.49792	4.1156	1.73051	1.58238	10.0719	5.90856	19.1844	42.9682	25.1357	25.2155	44.532	29.6735	8.54119	4.6228
PCHAS_0102300	11.4819	12.189	15.7127	10.5711	13.3038	8.10149	7.35095	5.23581	4.86733	5.74139	10.2437	3.37488	28.3564	3.62564	16.2032	17.5078	15.76	17.4854	8.71249	10.4019
PCHAS_0102400	64.4263	87.3292	91.682	78.2144	92.6582	33.0999	64.8614	100.293	24.3859	77.6919	120.731	107.989	129.566	57.4838	69.0718	66.1185	67.5579	100.012	69.0674	64.6851
PCHAS_0102500	36.9229	62.5904	56.5894	48.824	59.6463	21.7279	39.38	49.3356	18.9802	37.7845	98.9309	60.2355	87.975	44.1821	49.0526	46.7525	51.767	76.1202	46.146	43.8173
PCHAS_0102600	88.2985	104.435	109.651	118.383	102.712	97.063	107.744	129.146	77.0897	110.543	83.4603	116.385	32.7668	70.2737	52.0607	58.9136	52.5274	65.7287	73.2594	91.206
PCHAS_0102700	69.0387	77.6849	81.5079	78.1787	78.8447	51.7383	59.4458	60.7653	45.5082	52.5234	22.223	35.8571	17.1845	25.8375	19.8258	23.047	17.4706	28.7068	48.9399	66.5495
PCHAS_0102800	99.4385	129.444	128.205	101.839	134.364	53.2516	72.3355	62.1867	48.5606	50.571	96.065	64.3775	238.084	119.618	168.846	168.633	162.535	228.562	179.061	135.747
PCHAS_0102900	26.2221	35.1066	37.013	34.4249	34.0887	16.8855	25.2477	33.8455	14.2655	28.0251	39.7843	29.0371	58.7939	33.2071	30.6843	34.1492	31.1857	44.0913	28.6527	32.5507
PCHAS_0103000	57.2859	62.3143	40.5288	66.5354	31.4686	131.545	127.077	170.269	132.106	148.401	74.0355	123.872	17.8238	16.6977	30.5062	14.9317	12.545	14.7804	10.0312	36.3724
PCHAS_0103100	1.55375	1.69513	0.558494	0.779164	1.32579	0.344502	0.471146	0.51193	1.00452	1.03335	1.73725	1.01763	3.53831	4.00853	2.36605	2.10594	3.33429	2.56944	1.13325	0.724097
PCHAS_0103200	25.4421	33.9257	33.649	31.305	45.5655	13.1011	18.9042	21.6257	9.71211	18.269	9.94865	20.9895	4.77347	10.335	7.84319	14.0362	9.56722	14.5111	21.9134	27.6741
PCHAS_0103300	12.9449	15.3666	13.5361	14.1826	13.9931	14.4534	18.2959	18.0554	14.3347	22.5615	47.5554	32.1898	4.84961	22.6903	16.0941	10.0259	10.0994	8.55547	11.273	12.4665
PCHAS_0103400	1.95373	5.84388	2.02672	1.70548	1.35517	0.282775	0.290045	0.58182	0.353371	1.45405	4.93605	3.89802	6.07882	19.7418	5.27143	10.1509	6.35658	6.42758	2.32548	1.25863
PCHAS_0103500	6.77173	7.84609	9.99669	7.50277	9.29559	2.03562	3.63458	4.03323	0.942153	3.55371	1.9302	2.67245	0.648291	3.50902	2.44107	3.23595	0.988625	3.48098	6.32418	6.54373
PCHAS_0103600	2.6151	4.19043	1.13033	0.760937	0.714571	1.57708	2.07056	3.41796	3.07445	6.81195	55.3151	11.0563	10.3064	30.8288	20.9201	7.67971	10.1628	6.36295	1.08944	1.26353
PCHAS_0103700	135.67	134.165	147.057	139.579	138.835	98.7427	115.092	76.1874	117.785	59.6213	25.4627	68.4997	24.1213	78.337	27.523	53.4144	33.6313	45.4311	102.428	118.2
PCHAS_0103800	41.5807	47.2868	46.9871	46.2114	38.0688	32.1153	36.2852	45.7294	16.5014	42.8915	20.5837	32.1033	14.4852	26.5563	21.593	30.0237	20.4608	33.0025	29.4945	39.183
PCHAS_0103900	32.5555	24.4782	3.89673	5.73841	13.9752	1.08737	7.24963	5.59327	3.39709	3.72757	40.1762	17.1306	56.8797	202.438	50.6764	91.2207	103.884	105.431	17.4375	5.64655
PCHAS_0104000	219.26	232.262	232.81	224.082	227.35	128.469	158.277	156.326	81.9841	158.957	142.873	123.067	308.366	216.001	228.239	246.891	242.732	283.465	253.109	239.743
PCHAS_0104100	159.461	139.877	109.04	160.318	107.618	225.921	198.924	223.786	215.994	226.859	77.8033	163.487	22.9178	79.1793	49.0726	33.7209	28.6815	26.1017	64.3559	113.329
PCHAS_0104200	2.2035	3.50263	3.29158	2.25051	3.90162	0.765422	1.41318	1.04992	0.573907	0.721574	1.11342	1.35659	2.1939	0	1.42688	2.56848	1.864	3.09907	2.45492	2.66874
PCHAS_0104300	97.8049	101.613	119.363	120.532	106.416	101.034	91.1047	89.0919	90.1839	64.7027	34.8849	67.7786	15.9116	51.6749	19.608	37.2564	45.7563	24.4481	58.4357	93.8941
PCHAS_0104400	187.168	182.446	189.407	193.29	195.357	146.583	164.222	103.872	129.104	111.717	51.615	72.4317	18.6043	75.5249	51.4779	89.4866	80.0468	85.6794	142.788	156.49
PCHAS_0104500	105.207	131.86	117.826	126.9	121.188	127.589	142.21	170.622	94.3558	187.395	183.691	181.924	112.797	138.81	109.053	94.6858	93.2051	117.498	101.935	127.782
PCHAS_0104600	165.285	164.878	152.059	169.163	152.813	205.975	180.652	227.597	184.033	202.533	187.878	243.96	28.5207	57.8905	88.354	69.4982	62.4439	58.3115	87.968	132.131
PCHAS_0104700	43.0589	45.0819	33.7103	39.9836	27.2599	73.2963	70.9021	84.6005	75.5844	77.1154	76.8011	93.8796	19.6422	76.2716	43.8502	28.5995	44.6517	28.7834	15.9269	31.3865
PCHAS_0104800	1.53743	5.91257	7.17689	5.53606	5.23509	4.67295	5.47781	10.0726	0.834223	3.43267	4.66113	5.25845	1.91342	15.5352	1.96493	4.68859	0	1.89675	1.64697	2.47611
PCHAS_0104900	27.036	31.2445	26.4069	28.428	23.5574	17.0752	23.5347	34.7669	11.5581	31.4015	19.4567	23.1177	5.60795	8.27845	10.9943	12.77	9.66261	13.8977	18.7231	28.3688
PCHAS_0105000	0.618195	0.978937	0.0970016	0.380924	0.220131	0.189476	0.323913	0.0866342	0.157853	0.216511	1.32298	0.373129	0.724119	1.4698	1.7351	3.10514	3.4311	1.88425	0.571345	0.374827
PCHAS_0105100	38.6026	25.6479	3.97656	6.7806	14.4269	2.45291	6.28993	5.32733	3.57617	3.50363	41.3901	14.4913	46.8713	180.762	62.1721	123.466	171.546	127.773	23.198	5.45896
PCHAS_0105200	20.5391	22.8694	17.1212	24.9544	15.5167	19.8373	20.3473	22.8193	9.14435	22.7821	8.64856	14.973	4.26033	18.6254	5.7773	4.77358	8.56732	4.83233	3.99618	12.0018
PCHAS_0105300	3.99253	7.54244	2.42896	2.75149	3.81612	1.82483	3.74349	2.75341	2.2804	2.81502	11.6797	2.15615	6.27653	59.453	6.44553	13.3862	21.8778	9.59202	5.70266	2.70744
PCHAS_0105400	30.1278	45.8087	48.4116	36.442	46.6169	13.0231	23.7072	23.9791	9.67662	19.1043	66.9011	19.4077	124.93	35.4942	48.8079	41.4758	43.0772	63.9208	41.9712	41.342
PCHAS_0105500	236.752	202.378	214.894	239.728	195.001	191.49	202.401	173.909	130.591	170.614	66.6934	123.782	39.8817	86.0454	75.0373	110.558	87.491	93.5827	142.594	202.831
PCHAS_0105600	227.934	182.685	188.271	188.723	172.168	220.795	191.13	175.062	243.404	172.953	157.929	162.013	228.755	409.093	237.329	254.615	293.741	295.191	189.094	210.219
PCHAS_0105700	158.38	99.0237	13.8234	26.0819	45.9524	10.9694	27.6958	14.4679	21.0892	10.8472	115.869	46.5267	142.695	844.368	210.285	376.654	625.946	437.541	95.0676	21.2827
PCHAS_0105800	96.0835	99.2542	106.004	101.627	96.846	77.7697	78.6058	85.7852	73.0913	69.5655	54.961	71.4696	79.4112	105.572	74.5548	89.0119	99.5507	98.169	94.3353	100.481
PCHAS_0105900	70.2573	72.7592	72.8154	67.3123	68.1841	32.5	47.7892	46.3895	20.3818	44.1947	34.4364	38.9675	59.553	53.0263	51.2432	64.6694	68.4074	76.4974	61.4926	67.1244
PCHAS_0106000	137.307	139.252	131.938	145.277	129.873	135.893	143.209	148.695	105.009	173.488	78.3184	119.354	50.1323	70.7876	66.1806	85.456	69.0902	80.2151	98.5602	122.642
PCHAS_0106100	107.464	167.895	169.955	135.584	185.08	65.6182	81.7633	47.6708	51.6296	43.3222	49.776	44.9876	72.4453	22.6227	68.6731	85.3453	81.9472	120.496	144.701	140.985
PCHAS_0106200	230.963	276.342	274.03	245.358	291.933	94.3072	154.123	177.948	64.5644	162.612	133.048	160.613	215.504	160.137	203.542	231.174	199.063	279.653	271.725	252.979
PCHAS_0106300	1.28119	2.29933	0.683513	0.503278	0.581676	0	0.228242	0.457846	0.278074	0.762815	1.55371	1.31461	4.46464	10.3568	3.05656	3.82033	4.58528	3.63543	1.64697	1.32059
PCHAS_0106400	57.4074	48.8582	36.8421	31.89	39.61	22.5233	31.2728	26.1854	20.9381	21.186	29.8867	24.3409	28.7361	191.762	44.1974	77.595	112.685	91.5057	36.1419	32.6021
PCHAS_0106500	3.8947	4.80776	3.84781	3.96645	4.47518	2.00428	1.28488	3.0929	2.81773	2.14711	2.47819	2.46685	0.35905	5.83031	0.491622	0.78205	1.40796	1.60165	1.23621	2.04441
PCHAS_0106600	64.081	75.1474	69.4984	79.518	62.9128	70.8713	73.3759	81.924	69.23	79.8429	50.6267	75.6793	31.2333	46.4585	41.2967	41.415	43.0072	55.6593	45.012	68.4953
PCHAS_0106700	45.3254	52.115	50.6297	45.4625	57.7033	26.314	34.6378	31.7332	28.7729	24.6186	12.504	20.7277	11.9419	30.6182	22.3755	38.3318	35.7376	34.1119	62.5758	50.4282
PCHAS_0106800	7.29715	11.1213	6.19999	6.1576	6.01247	4.92874	5.1999	7.3402	4.39944	6.87908	5.48984	4.71435	4.23813	39.3254	8.42814	14.506	16.883	13.3038	7.18012	6.26797
PCHAS_0106900	18.9381	33.3163	6.65373	9.87379	6.5553	17.146	24.3036	40.6267	10.6195	48.8382	62.215	47.8419	30.3036	108.187	35.9505	51.454	67.7965	50.4211	10.6884	8.78867
PCHAS_0107000	24.2473	28.8224	32.5357	24.5337	32.6087	11.2941	17.0821	10.8969	8.1333	7.0543	6.01463	4.5236	3.29205	8.90947	8.63953	15.3866	9.32337	16.0449	24.5581	24.993
PCHAS_0107100	52.0753	51.9658	56.4236	58.7963	51.2614	39.5362	42.2193	31.666	27.4105	33.8831	12.1325	20.5309	5.43322	6.30182	10.6276	13.6304	12.1746	11.445	29.2847	41.9852
PCHAS_0107200	120.937	105.874	128.514	120.867	107.66	90.7086	78.8218	52.7046	92.6417	53.203	24.5486	42.7286	12.9566	84.1563	33.1157	55.0306	50.2427	48.5919	109.293	112.226
PCHAS_0107300	70.0109	69.2437	71.204	78.2819	68.1747	57.8383	59.3253	59.4084	46.2122	56.9058	25.916	44.1246	10.3123	38.1538	22.431	33.763	27.9825	33.3847	49.9619	60.0014
PCHAS_0107400	33.2288	55.3265	59.0917	45.5103	51.4436	22.5544	38.784	36.3973	21.5534	27.2886	22.7731	23.5142	14.2604	0	9.11202	22.2601	19.8826	32.0419	33.2778	43.3055
PCHAS_0107500	30.9913	33.3747	35.786	34.5594	39.22	15.5568	22.4458	13.8704	12.8308	12.4436	5.49145	10.0076	8.17482	31.3759	11.6003	19.91	17.291	23.4268	34.7133	33.9293
PCHAS_0107550	8.50465	15.672	14.2969	13.05	10.4574	12.0015	12.0734	17.7287	11.8252	18.3952	13.1606	21.3617	3.96919	5.37103	5.88763	5.04311	2.16175	7.54133	8.73099	9.24559
PCHAS_0107600	201.482	277.2	219.523	257.133	216.019	257.28	312.427	414.431	315.352	297.369	295.96	399.888	67.81	298.217	147.009	112.312	90.4823	121.135	170.238	216.454
PCHAS_0107700	677.277	729.338	684.579	766.877	698.243	716.426	750.89	789.605	739.461	713.573	301.397	583.521	114.651	280.818	226.267	263.325	198.421	236.828	475.97	613.362
PCHAS_0107800	21.4514	24.7877	15.85	24.5279	14.8602	33.5841	28.5269	25.9127	16.3939	20.6871	15.8772	17.5674	3.7602	24.4235	22.6538	28.6654	39.3202	18.6372	18.988	21.4104
PCHAS_0107900	366.604	408.849	416.099	405.191	437.139	213.277	279.615	211.301	171.059	198.567	91.042	146.618	128.097	184.994	139.25	199.725	160.537	217.327	337.236	396.979
PCHAS_0108000	1265.35	1274.09	1254.43	1050.79	1333.95	984.858	919.458	874.002	930.591	981.695	359.8	686.69	427.983	762.983	591.993	1382.82	1201.69	1516.66	2042.48	1586.21
PCHAS_0108100	30.2237	34.8698	37.6858	32.9484	33.8261	25.6363	30.8032	34.3278	18.4591	28.0387	18.8234	21.8767	17.8453	28.4092	18.6851	24.6742	18.9809	25.0605	24.3958	29.6136
PCHAS_0108200	14.1378	15.1868	13.2598	14.8508	12.5078	10.4539	14.7837	18.8741	7.50677	25.8076	19.9049	21.5851	12.3265	8.16976	11.2519	11.3086	9.82804	11.9836	10.6501	13.7594
PCHAS_0108300	300.597	280.623	293.403	267.875	250.637	232.107	228.501	174.981	245.34	163.455	123.467	140.311	207.343	173.774	222.847	256.159	274.519	253.495	247.172	290.361
PCHAS_0108400	17.9581	25.481	24.0125	24.5913	23.443	9.9999	13.9202	10.4509	8.0334	7.5498	7.48095	9.84623	13.99	0	11.9138	17.2797	9.36628	17.4197	19.1886	23.3146
PCHAS_0108500	45.9228	46.7522	50.2043	47.0974	49.8767	40.098	45.8974	51.2156	34.495	54.1614	63.4003	57.7922	54.1344	27.0475	60.0108	61.6764	57.6967	58.4099	48.2688	46.0202
PCHAS_0108600	12.3498	13.6072	17.6059	12.2952	14.8283	4.78627	7.27306	4.01211	2.87982	3.03844	9.79882	4.18908	24.1348	8.25062	15.6534	13.6954	13.2829	20.9025	17.6397	13.808
PCHAS_0108700	3.71361	4.06046	4.17607	3.57545	4.87625	1.61248	1.84852	1.88655	1.06679	1.13805	4.96712	2.80183	4.07805	8.82935	4.56011	4.88535	5.86355	5.65954	2.80815	3.16639
PCHAS_0108800	43.5821	50.0138	50.1086	40.7979	46.7725	17.8145	29.5807	22.0846	11.257	20.2795	89.5735	26.6089	122.257	35.9814	82.842	61.4839	63.5945	76.8793	52.0775	49.0216
PCHAS_0108900	35.3717	33.0516	6.82074	6.13823	10.9641	5.55132	11.7677	10.9144	11.0996	11.101	116.498	34.2537	62.5855	266.987	106.754	116.968	148.361	109.885	29.2179	9.60905
PCHAS_0109000	12.6107	13.6822	14.2511	13.007	12.1278	10.5842	10.9818	13.0077	7.56898	11.9022	6.79928	9.9999	2.54271	1.42376	5.10229	7.2571	5.61578	6.95327	9.71051	10.4387
PCHAS_0109100	126.597	147.156	157.592	155.795	161.05	115.064	118.361	93.2024	89.662	81.8926	37.5155	57.9501	22.7451	84.64	53.8519	78.6984	63.7967	72.338	121.002	141.037
PCHAS_0109200	83.2728	102.052	98.9746	97.2296	94.6769	94.4626	107.936	141.49	89.9103	112.205	132.568	130.601	68.3902	74.0354	73.7131	66.0778	58.2208	73.7047	66.6151	87.5038
PCHAS_0109300	182.949	203.027	183.841	190.543	174.561	145.498	208.209	261.757	108.596	226.079	242.784	234.271	246.229	154.375	205.02	185.156	169.417	216.911	186.392	176.01
PCHAS_0109400	425.1	461.979	234.515	408.037	149.932	1488.97	1164.79	1678.6	1655.77	1679.87	2540.42	2145.31	474.443	1254.15	1218.42	411.554	510.545	259.764	101.936	278.713
PCHAS_0109500	261.035	274.354	266.94	302.681	305.361	217.755	262.615	145.846	240.229	154.544	74.2398	113.905	25.5997	39.5897	55.9161	77.6642	63.7367	71.2962	193.767	222.746
PCHAS_0109600	146.172	256.177	237.338	245.026	244.723	115.287	203.794	324.687	98.0891	248.057	193.392	231.861	59.7609	57.0828	48.1333	64.1258	34.4623	65.3385	99.8525	155.58
PCHAS_0109700	296.12	310.117	272.97	338.011	275.783	323.195	355.402	407.153	252.598	422.826	186.679	321.173	80.769	153.868	124.029	131.083	102.331	112.159	203.387	252.37
PCHAS_0109800	87.7601	101.854	98.682	96.7653	90.0235	53.7482	85.3809	119.852	35.1333	118.031	100.344	113.082	82.4269	68.4198	77.6149	72.2729	71.7704	89.0182	78.6558	86.9693
PCHAS_0109900	50.2219	67.3433	73.4292	52.0031	74.8913	25.1826	40.804	36.7956	31.0135	30.6525	72.4142	34.4983	65.9036	25.4799	70.1846	69.4942	62.215	83.995	91.2426	58.4808
PCHAS_0110000	79.8341	83.9717	71.5923	103.641	60.4094	173.027	200.571	282.856	210.299	256.961	310.995	338.402	42.4606	110.317	97.6727	60.1146	35.5207	48.8252	28.2638	49.2329
PCHAS_0110100	94.9968	107.32	115.902	107.917	131.621	78.3529	100.459	103.859	71.5525	86.1967	62.6866	90.5016	12.4167	61.364	29.5676	41.1554	28.2263	41.4744	82.7133	98.9242
PCHAS_0110200	280.734	308.902	272.486	308.733	267.211	430.909	395.402	478.574	465.782	431.38	342.458	491.553	74.773	209.642	160.202	136.501	125.16	115.448	197.867	247.823
PCHAS_0110300	26.0377	33.7815	37.2807	30.4888	37.6191	23.0898	33.0727	41.6983	20.8296	36.2979	49.765	41.7032	41.706	22.2564	25.8716	27.0815	20.2191	33.0936	26.966	29.0885
PCHAS_0110400	7.55003	13.0449	2.48097	0.859654	6.08559	0.285068	2.63157	2.34615	0.356236	0.244307	18.5773	12.3502	26.1466	72.9734	12.5862	26.028	28.8366	42.3205	8.43962	2.96063
PCHAS_0110500	19.5131	24.282	4.82423	3.73909	8.57106	2.14918	7.46116	7.25664	1.65276	5.38394	69.8366	21.8127	40.0408	130.807	41.8488	54.0568	74.3262	82.7894	14.6833	5.15093
PCHAS_0110600	4942.37	4816.15	4681.17	4682.38	4898.35	4494.86	4071.57	3700.45	5132.88	3641.82	2825.45	3606.94	4726.65	3965.06	4859.89	5278.97	5216.97	5005.33	5406.27	5242.42
PCHAS_0110700	17.3644	26.0096	12.6723	13.1764	11.1915	28.0454	47.277	82.6539	23.7202	93.6679	136.602	129.908	26.0962	59.5905	41.594	28.5471	27.4866	27.6589	13.571	14.2017
PCHAS_0110800	133.057	141.702	139.848	146.974	113.848	191.988	170.182	207.265	163.648	156.919	117.571	178.536	27.1748	68.9483	55.2316	58.2649	55.5011	50.5089	66.761	102.422
PCHAS_0110900	26.0265	20.8524	29.8915	31.2392	12.3087	94.1742	112.051	133.053	155.344	187.244	309.049	218.836	40.4893	131.494	79.4628	35.276	49.396	20.0683	18.5873	15.3696
PCHAS_0111000	94.7749	117.526	129.253	114.456	141.249	59.3182	81.1877	89.2485	48.4143	73.0774	68.7059	67.8977	117.953	103.531	76.5691	85.4932	77.0889	102.309	105.948	113.586
PCHAS_0111100	13.4012	17.7669	4.01376	2.63213	3.76266	2.38881	5.59154	6.55341	4.59259	7.50655	56.8097	18.9374	21.2431	82.6739	41.647	40.8686	57.141	35.0243	8.51286	5.72525
PCHAS_0111200	22.1299	33.6465	26.0836	15.4993	29.5965	11.6201	21.0873	16.5523	11.1701	12.2567	16.123	17.6024	7.68609	20.8013	7.89304	17.4387	15.07	19.6828	18.3772	29.8392
PCHAS_0111300	5.94364	7.95052	4.36576	4.06049	8.40832	2.24415	5.52443	3.69394	2.80441	3.84653	7.57351	4.41933	3.8594	52.2247	2.64221	6.65491	10.9302	7.65156	2.58376	2.99662
PCHAS_0111400	56.1739	66.8202	10.3495	11.265	29.1032	3.51584	18.9327	16.8792	3.29518	3.7664	108.934	34.6181	109.591	306.82	80.202	159.134	169.593	293.442	54.2128	13.6929
PCHAS_0111500	24.2316	32.5968	36.1757	26.4407	30.899	12.9895	16.5211	16.5704	15.9078	12.6907	17.6859	15.8595	33.8807	12.0914	30.0774	33.2487	23.8463	40.2288	38.0291	35.4608
PCHAS_0111600	15.5013	17.7673	12.6481	12.1784	12.8336	14.2534	20.4678	18.6823	33.2487	33.1171	458.536	61.1275	129.825	331.697	258.872	47.7056	64.6746	40.9481	17.7128	15.508
PCHAS_0111700	35.517	51.6633	50.8886	38.7951	49.8514	22.6931	35.4066	50.8569	21.9679	45.1968	108.423	66.7185	134.212	14.8761	57.7016	45.6451	44.9054	69.6997	45.4731	44.1018
PCHAS_0111800	132.805	148.651	162.544	140.578	159.123	76.6812	102.185	89.342	65.2302	86.3027	147.292	77.3222	365.432	128.999	198.815	192.018	205.66	231.983	178.546	166.314
PCHAS_0111900	975.259	1060.85	1239.2	1185.36	1269.14	780.337	908.586	784.701	720.472	675.653	358.347	563.278	260.046	374.424	352.556	463.172	368.377	515.561	796.102	1077.53
PCHAS_0112000	378.567	316.45	382.191	361.445	333.603	321.905	248.689	207.624	335.509	226.571	250.268	186.129	276.799	223.142	356.155	368.795	395.168	408.663	373.998	374.967
PCHAS_0112100	97.5639	154.421	152.255	126.447	131.077	89.9132	115.281	107.916	77.7879	85.9479	76.4629	81.7214	44.6046	80.4773	33.93	44.5288	35.6299	72.465	86.7405	74.397
PCHAS_0112200	1.78778	2.14854	2.58314	2.77984	3.21287	2.81396	3.38395	3.59369	2.78893	3.49267	48.7246	6.30578	10.0124	18.0648	17.9935	4.08903	4.18071	3.51518	2.39394	2.15948
PCHAS_0112300	153.54	145.783	159.955	152.659	154.548	202.99	164.832	160.717	226.311	182.066	88.0045	153.822	27.0947	92.6249	52.2314	50.8618	40.076	56.8979	98.606	138.774
PCHAS_0112400	21.72	23.7627	25.5836	24.6808	25.2195	15.7183	20.6811	15.4642	13.8174	16.7223	10.0919	14.0892	7.30166	15.136	11.1676	13.9581	10.9656	15.8621	18.4535	22.9187
PCHAS_0112500	1.93908	3.72861	1.33231	2.30821	1.26719	1.68393	1.41318	2.20484	0.956511	3.01749	61.995	6.33074	17.99	39.1874	29.2886	4.77856	8.88984	6.74185	1.8884	2.38483
PCHAS_0112600	36.6433	46.6132	48.6645	36.8139	46.6616	24.09	37.7318	38.1792	18.7134	29.0152	47.0704	33.6565	55.5186	34.0911	39.2865	41.0284	38.4191	56.3067	40.1576	41.6583
PCHAS_0112700	2.01569	4.29656	1.1879	1.44243	0.354708	6.43191	13.6538	23.4524	8.95333	35.4457	127.338	61.0861	10.0345	25.5782	28.4778	7.68784	6.63442	5.06031	0.970851	2.26491
PCHAS_0112800	2.4508	4.05501	1.01356	1.30602	0.323457	0.692938	1.52304	1.79915	1.17519	3.90249	197.708	19.494	75.7573	105.969	114.996	16.9179	30.9681	15.7859	1.9945	2.64366
PCHAS_0112900	0.935392	1.10685	0.575803	0.565294	0.490014	0.499882	0.640917	0.685683	0.468509	1.60652	24.2868	2.9532	5.37298	8.72474	11.2805	2.92574	4.44798	3.1957	0.616639	1.2052
PCHAS_0113000	11.8914	18.12	18.3539	12.0452	15.3929	4.67624	8.92675	5.61255	4.7074	5.00949	172.853	16.8827	267.322	30.2286	102.594	48.5552	67.889	76.49	26.2785	18.4049
PCHAS_0113100	61.8494	77.8488	81.3587	60.1722	78.7205	40.3495	54.0934	50.6134	37.3749	43.2251	169.184	62.3823	214.819	90.6045	151.757	126.781	133.933	152.483	121.961	75.4882
PCHAS_0113200	34.5487	39.337	31.8643	29.7841	22.7326	114.42	116.597	157.46	174.656	189.092	526.537	342.022	204.573	121.427	232.936	90.7454	104.726	81.0105	37.3934	36.2195
PCHAS_0113300	0.599653	0.419293	0.193887	0.214142	0	0.757452	0.582694	0.389621	1.30151	0.568002	0.49582	1.11872	0.407073	0	0.464482	0.147775	0.354729	0.538036	0.077864	0.210714
PCHAS_0113400	45.1454	43.4778	44.0131	39.0088	40.0566	33.4336	27.3529	27.298	26.3615	28.3119	62.2979	25.8656	151.16	64.8374	103.877	79.5153	77.5423	75.4869	67.7558	57.5766
PCHAS_0113500	13.2416	23.1205	6.49595	10.4629	2.93681	116.578	149.265	206.413	199.197	255.549	539.423	451.337	143.204	138.415	209.307	58.1745	53.4813	35.4891	9.78277	15.296
PCHAS_0113600	39.953	47.4117	49.3286	31.0897	37.6603	15.4644	19.1157	14.6855	18.3341	13.9328	208.34	39.8238	463.14	147.643	254.437	161.527	224.324	177.446	85.4362	55.3011
PCHAS_0113700	18.8838	31.9098	25.5677	18.2638	19.9723	13.0446	14.5269	14.0589	16.767	13.7347	83.925	25.6884	213.119	52.0401	112.263	75.6212	97.0465	88.688	44.1365	32.0722
PCHAS_0113800	5.15012	5.50168	4.96091	4.21473	3.73465	2.98163	2.676	0.766851	2.7945	0.958235	70.4797	13.9451	183.742	34.6934	72.0383	23.2681	55.1559	35.2104	4.59755	7.74157
PCHAS_0113900	1.48118	5.06334	2.63403	1.61622	0.373597	0	0.879568	1.17625	0.535802	1.10236	81.0803	7.5991	132.111	49.8894	85.8181	21.7488	56.223	28.6285	4.23124	5.08911
PCHAS_0114000	70.2039	51.6231	67.9757	37.2212	51.1669	28.7999	37.5968	23.8567	37.3921	28.2079	399.568	95.7522	1361.51	557.063	625.323	445.704	543.706	464.141	135.955	100.72
PCHAS_0114100	205.226	287.555	304.376	238.338	209.712	136.632	142.197	66.4583	154.668	66.8765	400.661	117.082	1212.97	458.983	771.802	467.989	586.861	471.457	349.313	244.277
PCHAS_0114200	281.069	316.261	318.657	218.413	297.784	132.885	164.771	84.7135	159.556	93.6643	1714.57	311.563	5051.42	1412.99	2377.81	1535.47	2188.37	1686.72	810.339	408.47
PCHAS_0114300	0.44555	1.0852	0.673484	0.495893	0.573141	0.116077	0.595305	0.212295	0.0967038	0.198959	23.0537	1.82869	8.31767	9.90468	7.02311	1.57012	2.39188	2.25369	0.381836	1.00461
PCHAS_0114400	19.5827	31.0267	24.8467	22.1844	19.3133	16.8149	26.6547	23.589	17.1923	17.6857	178.333	48.1643	386.663	80.04	190.1	73.9604	146.756	84.4224	35.1991	30.6177
PCHAS_0114500	4.08946	6.81505	1.45448	2.40964	0.154722	31.607	45.5332	54.8027	46.5985	56.9144	66.5375	79.0272	13.7418	8.26451	20.5579	8.8685	7.31792	3.78391	2.04439	2.89797
PCHAS_0114600	110.205	96.5155	124.327	98.1516	122.206	70.1252	74.8759	58.5418	62.4917	61.8223	109.198	76.9711	293.67	133.763	157.909	182.788	194.892	204.35	117.23	144.977
PCHAS_0114700	12.3979	21.0111	15.8816	9.6302	6.99622	7.29932	7.86133	4.50558	6.84121	5.94283	206.2	43.1229	858.839	135.893	310.459	117.343	241.339	144.399	47.7223	27.3452
PCHAS_0114800	1.52386	0.868202	1.35496	1.69973	1.70827	3.62693	2.212	2.15136	2.81744	1.68018	0.741478	0.772151	0.702416	4.56238	0.769416	0.535479	0.734512	0.557037	0.886753	0.945341
PCHAS_0114900	0.997184	1.27831	1.06399	2.08914	1.20729	2.25152	0.888233	1.54419	1.73146	2.67173	1.91471	2.72852	1.48926	0	2.03914	1.62189	1.94664	1.84536	0.854586	0.770888
PCHAS_0115000	1.29669	2.07781	0.576486	1.27342	0.817659	2.62749	3.85007	5.6636	3.28345	4.34275	2.40244	1.84794	2.95865	8.73509	2.57796	4.68673	3.51573	2.39962	1.23474	0.139226
PCHAS_0115100	0.379553	1.21639	0.168742	0.248494	0.287203	1.31844	2.70467	2.48667	0.823795	1.97736	1.91786	0.64909	0	0	0.970186	0.514442	0	0.468259	0	0
PCHAS_0115200	0.396918	2.79849	2.8234	0.779588	1.50171	2.41283	1.06066	3.07325	1.72297	3.54484	2.40673	3.39393	0.987973	0	2.70553	1.07596	1.2914	0.979366	0.850397	0
PCHAS_0115300	0	0.258634	0.179394	0.528359	0.152666	1.40166	1.07827	2.40331	0.437898	3.60373	3.87395	3.45031	0.502192	0	1.03143	0.273458	0	0	0	0.519901
PCHAS_0115400	1.0328	3.97188	0.183665	0.270469	0	1.79379	2.94386	6.15133	1.34497	4.91938	49.2642	17.6623	56.0423	16.6977	38.7194	6.99921	22.8498	10.4482	0.590072	2.12912
PCHAS_0200001	36.1324	49.946	43.74	33.6313	36.3996	15.878	17.4495	8.03773	14.1728	3.5639	50.373	12.6561	203.714	79.1793	119.807	92.6365	125.349	100.969	62.4905	45.1522
PCHAS_0200005	9.11964	11.4249	7.37168	7.0562	5.64603	25.9188	11.4464	43.9469	27.4411	28.6915	124.419	117.678	14.9612	58.6413	32.4941	18.2601	15.51	17.3879	4.73668	8.54554
PCHAS_0200011	3.26867	5.95444	3.51825	3.82948	1.04141	29.5808	8.27491	40.3708	26.1374	22.0222	118.223	123.566	7.70787	41.7206	29.3163	10.4929	5.03755	5.5183	2.21151	4.65481
PCHAS_0200015	1.80382	2.31234	2.85136	1.57461	1.36492	8.70257	3.21347	15.7571	10.0052	11.3365	60.1563	63.7522	6.48541	24.3026	19.4678	5.43305	2.60837	4.69805	1.71763	2.84058
PCHAS_0200021	6.19271	10.4993	7.10494	7.84717	4.98826	17.6948	6.76168	38.3114	15.1752	18.1382	78.1276	86.0898	10.9392	32.2968	15.9996	4.87366	1.29989	5.1755	3.7093	6.69202
PCHAS_0200025	2.95756	6.06614	2.1038	0.774526	1.34277	10.9585	2.81005	30.5329	12.8384	11.7394	153.03	124.086	10.7971	55.7854	31.9195	12.0259	0.641506	8.5138	0.844875	4.82681
PCHAS_0200031	3.89285	5.23982	4.15366	3.31325	0.883701	12.5083	7.62856	30.6052	27.4598	27.2339	270.664	186.405	19.3795	94.4061	78.9416	20.0501	3.16641	11.7665	1.66809	6.26964
PCHAS_0200035	0.484375	1.00901	0.753705	0.317121	0.687225	1.0516	1.07863	1.22609	0.525652	0.450616	0.489504	1.24252	0.301415	0	0.206354	0.164129	0	0.373487	0.432405	0.468066
PCHAS_0200041	1766.95	1681.75	1838.32	1500.77	2074.94	1159.5	1151.52	799.204	1360.96	897.125	1706.63	941.802	6757.67	2404.12	3934.26	4154.72	4517.36	4316.71	3679.05	2210.69
PCHAS_0200045	45.8441	81.6649	88.9372	51.4528	96.8605	22.7495	57.2754	47.5172	47.8124	46.9692	74.6085	61.0908	31.1211	24.0643	74.0639	110.555	79.4209	116.789	209.198	69.8069
PCHAS_0200051	266.222	258.057	251.692	221.267	235.618	129.828	146.141	92.6207	114.813	88.3607	390.588	97.1591	829.906	419.52	570.029	475.23	547.429	480.756	307.948	313.45
PCHAS_0200055	0.0639921	0.410162	0.170698	0.0837913	0.0484219	0.444574	0.342003	0.762272	0.694453	0.571508	0.388018	0.656613	0	0	0.436192	0.173468	0.416404	0.157896	0.091402	0.1649
PCHAS_0200061	6.30946	12.1323	8.4152	4.1308	2.53634	4.79432	2.81005	2.58356	5.56329	2.93485	529.828	43.8346	908.922	175.326	384.042	93.8022	209.772	118.95	9.85688	18.5451
PCHAS_0200065	25.4582	46.2333	8.7245	20.1399	3.21065	190.684	243.302	369.911	300.451	423.547	888.681	667.57	56.1074	235.809	248.096	64.6984	55.2199	36.97	9.84827	20.5009
PCHAS_0200071	35382.6	32377.9	34836.5	32985.7	40119.7	38385.6	34651.7	32036.4	39955.9	36922.9	35922.2	36904.9	33754.1	31029.6	35114.2	38417.2	35000.9	35280.7	43632.5	38195.4
PCHAS_0200100	7.7676	6.33653	8.16242	3.69851	6.9463	3.67936	7.54792	8.41158	3.06529	0	12.1316	2.41522	7.03069	0	7.21999	10.5281	6.89246	12.1965	10.0861	8.18844
PCHAS_0200200	35.3905	53.1349	60.1197	49.9467	61.2699	12.9153	26.7401	25.2614	14.3464	18.4477	17.1172	15.0718	14.7389	16.6977	15.0184	22.2108	19.2655	31.7694	42.8785	47.7277
PCHAS_0200300	387.903	402.868	450.88	398.584	425.634	374.437	394.882	410.527	303.157	350.275	210.197	301.178	170.055	214.774	187.569	222.239	165.476	287.511	338.288	369.708
PCHAS_0200400	100.512	122.456	130.067	108.539	126.201	53.5075	69.2949	60.987	35.8381	52.2897	44.7967	53.8223	74.7524	89.5824	84.9798	118.81	100.955	145.878	164.142	123.365
PCHAS_0200500	4.15238	6.65374	9.23035	4.07784	5.10583	5.40898	6.47272	4.9463	1.12656	2.31778	7.86815	0	3.87589	20.9791	4.4225	5.62809	5.06625	3.84213	3.70686	6.68762
PCHAS_0200600	46.6794	56.6437	66.691	60.8253	60.0125	28.3366	42.7903	48.8562	21.1482	31.7052	32.2888	36.4265	28.7655	18.3176	25.4855	39.0055	40.5489	45.8475	55.3456	57.808
PCHAS_0200700	180.172	173.762	199.433	201.431	181.652	162	173.637	171.457	153.29	148.825	120.878	136.56	70.9867	101.708	109.49	132.334	93.8796	137.839	144.488	178.105
PCHAS_0200800	12.078	22.5733	8.12974	12.7111	7.43097	37.0535	57.3109	103.4	33.8093	82.4967	172.365	150.183	17.1389	45.6238	42.1255	15.9114	13.5885	13.2296	6.28788	6.83554
PCHAS_0200900	4.11817	8.47637	4.89949	5.46828	3.29172	12.1896	16.8428	33.6479	9.56767	30.3902	60.9026	41.8591	5.19747	9.37749	11.2679	6.05342	4.71786	5.86778	2.07117	4.40923
PCHAS_0201000	87.3747	125.511	125.627	102.237	117.694	82.8733	92.7316	78.983	96.838	54.4206	55.7354	61.4648	24.6792	50.093	19.0077	44.515	34.2747	42.8123	90.2809	106.19
PCHAS_0201100	6.24779	9.61096	4.51831	5.67206	6.08287	2.74901	3.4875	1.98463	1.62725	2.23194	6.35604	4.55876	5.18381	16.8351	7.80762	12.3636	13.1452	9.45511	5.8303	4.50795
PCHAS_0201200	80.4653	84.4659	81.8063	81.1083	81.5656	66.4493	60.0437	52.4462	57.9952	49.2645	46.0286	32.1948	81.6263	98.1824	75.0277	91.3649	94.8402	90.2804	88.0416	80.2012
PCHAS_0201300	171.4	183.562	163.763	169.899	152.17	170.028	182.676	209.508	136.489	216.846	206.249	175.928	237.891	342.029	216.869	219.72	240.232	252.195	159.735	159.911
PCHAS_0201400	802.106	862.606	613.18	928.955	588.438	1685.24	1661.77	2368.11	1555.15	2397.96	1009.27	1995.3	281.353	664.433	537.343	387.431	311.183	293.82	424.776	573.272
PCHAS_0201500	28.6382	29.2946	25.2046	25.5298	24.7238	22.632	22.3476	20.0975	15.1964	22.3632	37.7369	23.9472	51.7986	41.2696	41.4277	35.1254	43.8196	40.37	28.2653	31.8243
PCHAS_0201600	77.0382	69.0421	65.2354	74.0932	62.4207	75.2353	71.4706	87.6446	59.3019	105.147	74.727	83.0476	43.3377	67.8289	63.8971	61.3421	68.0794	62.564	59.6996	67.7043
PCHAS_0201700	152.359	135.03	134.994	140.036	140.297	142.345	129.25	134.436	146.388	113.992	101.833	106.612	135.776	43.4435	145.614	143.862	166.11	147.854	144.312	148.873
PCHAS_0201800	94.9968	78.9609	94.8814	110.757	76.8062	102.462	106.641	106.959	109.212	103.307	42.9601	78.6326	14.0363	70.1303	35.4811	45.8589	35.2828	36.3904	60.7184	67.6261
PCHAS_0201900	24.6343	27.4148	27.6005	28.7115	29.2238	21.3144	22.5054	23.325	20.956	18.9383	13.9522	18.2092	5.61515	14.5888	9.99498	8.80591	11.1563	11.5778	17.5285	23.4852
PCHAS_0202000	57.5738	56.6173	18.4667	22.7194	38.1942	6.84903	22.4804	24.1132	10.8413	12.9134	69.3419	29.6727	88.3402	435.658	93.1826	155.713	208.703	181.952	37.9255	13.5489
PCHAS_0202050	70.9106	74.1195	54.6442	57.6148	60.261	74.5273	77.0912	76.6713	92.344	61.7058	69.8239	85.8197	25.3442	44.0939	39.6595	36.9659	48.5086	33.6474	32.7225	51.5387
PCHAS_0202150	1.8912	2.42436	0.934214	1.23817	1.27204	3.10221	5.98958	7.63446	4.78885	6.56839	21.6605	13.2962	2.09218	4.24664	4.47606	1.28166	2.73472	3.37017	0.750351	1.89521
PCHAS_0202200	123.532	140.156	150.047	142.446	158.85	82.9004	97.4849	111.242	50.7316	106.489	86.3175	80.6926	121.798	97.1228	101.253	104.665	97.3704	120.737	138.847	137.21
PCHAS_0202300	111.818	125.629	134.28	129.164	132.995	80.362	107.042	113.677	76.7132	111.916	160.41	82.4241	199.947	116.884	151.123	152.863	130.677	168.474	140.896	117.161
PCHAS_0202400	59.0533	76.775	77.4586	59.2272	79.8621	22.5499	41.7825	22.4502	33.6336	21.8191	19.8928	18.6222	30.232	101.568	30.6891	57.9014	49.0553	52.7034	72.3835	71.23
PCHAS_0202500	135.349	142.468	155.287	148.122	152.574	123.399	122.329	124.821	119.746	102.8	54.9536	61.0908	47.4227	0	77.1076	86.6146	81.358	106.261	121.89	130.409
PCHAS_0202600	138.651	187.587	184.112	179.634	231.7	202.69	211.812	253.189	150.07	216.182	142.707	198.95	57.3679	118.292	74.1861	61.981	49.9911	52.8061	89.3532	128.209
PCHAS_0202700	1.30399	2.6268	3.97528	3.6588	4.79258	0.97063	3.98234	3.99421	1.21295	1.3864	4.14164	2.54857	2.78208	7.52932	2.2221	2.0199	1.81826	4.13677	3.99113	1.68011
PCHAS_0202800	244.922	264.107	158.646	134.063	161.213	96.7582	107.74	104.324	111.655	88.8994	159.769	137.328	185.514	862.139	274.539	464.273	623.777	415.783	191.761	147.437
PCHAS_0202900	92.7459	118	21.403	15.4175	30.5472	7.85775	20.5627	17.6876	11.7078	13.382	114.654	65.6653	141.487	557.961	150.238	264.778	365.162	285.804	55.7558	29.2952
PCHAS_0203000	6.04537	9.15868	2.68766	3.5981	2.28722	5.72716	4.4058	4.90993	4.7713	8.99845	280.754	32.895	145.004	144.386	192.925	33.8927	57.2188	31.8671	4.70989	6.72696
PCHAS_0203100	75.0275	87.5529	80.6224	80.3991	85.9221	95.249	112.682	149.088	97.8514	138.47	151.814	152.473	37.6853	81.592	74.2465	56.7739	59.6583	64.1295	70.6419	72.1762
PCHAS_0203200	105.895	107.463	100.062	101.526	90.4917	142.235	149.712	186.699	139.463	183.258	182.367	189.493	86.2541	136.986	120.459	105.748	100.592	93.0119	88.42	98.2965
PCHAS_0203300	91.5906	92.1423	90.6451	91.5108	88.8916	61.556	71.6516	56.2114	44.512	58.089	81.4933	50.3949	98.13	64.3819	52.9308	46.6877	34.3342	50.6027	67.686	86.711
PCHAS_0203400	745.495	654.109	754.104	576.734	676.874	322.487	350.675	185.422	312.095	196.892	2908.45	513.303	5945.62	2355.81	3981.26	2260.23	2971.71	2241.19	1314.07	1004.15
PCHAS_0203500	111.974	113.383	113.995	124.172	106.67	128.597	129.304	121.435	122.703	114.824	179.691	103.542	197.007	176.905	146.684	102.332	131.129	142.193	102.63	121.95
PCHAS_0203600	365.263	416.097	376.132	376.91	354.944	285.207	403.964	551.206	194.627	468.935	514.88	512.491	307.172	335.198	315.02	278.952	274.446	342.568	311.945	363.98
PCHAS_0203700	36.3262	44.3158	44.135	43.9346	47.2813	28.4157	35.5683	40.7392	21.2657	31.3694	16.3471	31.6147	8.28273	26.1521	14.6488	20.0452	11.428	20.2984	31.1579	37.0384
PCHAS_0203800	631.688	617.103	618.63	717.114	575.14	763.852	710.872	732.314	727.046	707.464	300.132	567.168	98.0123	291.409	207.918	249.563	194.877	231.949	380.232	579.871
PCHAS_0203900	77.0785	70.9622	82.0348	73.0954	96.8536	51.5205	56.59	26.71	49.1742	33.3761	16.5231	24.7653	25.5809	37.7624	41.7926	66.1652	56.2354	69.7346	95.7482	75.5366
PCHAS_0204000	25.123	26.425	26.8165	25.228	31.6837	13.1208	18.3615	12.138	12.7104	13.9469	6.27327	6.20923	4.81029	21.3028	6.08744	9.36612	8.76457	10.476	21.3296	21.5042
PCHAS_0204100	18.8869	18.8104	20.7981	21.116	23.7458	18.925	21.2233	18.3445	17.9737	16.4352	6.46016	12.4228	4.33952	5.87215	6.18938	5.90747	5.67226	5.37714	8.50804	15.9111
PCHAS_0204200	6.09577	11.4276	1.8135	0.810183	1.69937	0.437821	1.18393	0.600555	0.397909	1.53498	9.14783	4.70284	7.30131	37.0499	13.7071	23.2334	32.2099	16.9351	3.56782	3.21838
PCHAS_0204300	171.66	198.263	197.234	184.35	181.31	139.818	182.09	184.023	118.617	194.225	237.342	183.007	196.321	149.516	164.873	154.534	141.991	178.095	152.283	179.697
PCHAS_0204400	185.696	265.046	259.376	283.599	279.433	185.953	315.806	421.493	177.521	333.881	318.21	413.016	74.2693	70.941	99.8974	64.2309	44.542	69.7246	126.35	192.673
PCHAS_0204500	59.8355	61.8211	79.2494	65.4854	87.1745	35.6754	53.1388	36.1698	30.6258	26.3205	16.7869	29.3236	12.893	21.6579	22.8279	31.2297	28.4753	42.3086	64.29	63.5166
PCHAS_0204600	21.6345	24.8143	28.4612	23.5241	32.071	10.3278	13.0726	8.74103	9.61095	8.85103	5.24215	9.51998	4.09391	5.11366	7.54589	10.6318	7.82103	12.0187	24.7572	22.8215
PCHAS_0204700	67.556	90.7468	72.8488	57.874	79.669	168.511	226.616	258.539	254.255	331.086	663.103	530.948	57.244	305.004	250.45	102.767	100.546	82.9013	67.75	60.6515
PCHAS_0204800	18.6783	20.3831	19.1632	19.1897	19.7146	12.9764	17.7467	17.3432	10.8107	14.2577	10.2609	13.4323	3.57634	7.74309	4.89684	6.88087	6.54457	11.2264	15.7337	17.8952
PCHAS_0204900	131.061	136.507	91.4191	134.626	66.0433	298.764	256.126	299.116	289.363	326.678	213.23	260.843	33.7473	102.749	91.4532	37.1356	36.7598	25.4385	26.6273	80.0648
PCHAS_0205000	38.1283	43.3588	50.6711	38.786	47.0382	13.3513	20.7244	13.4912	10.3444	11.3659	45.6791	15.2495	112.126	35.2131	65.6724	58.069	62.5265	69.6738	49.702	47.4093
PCHAS_0205100	0.456605	2.04865	1.21799	1.4947	0.691014	0.396523	0.813435	3.26344	0.495516	2.37878	3.92224	3.12344	2.84135	0	3.11238	1.54719	0	1.4083	0.652184	1.17662
PCHAS_0205200	16.8366	17.2166	13.11	17.076	12.1877	26.1152	28.2603	38.4304	21.4398	37.5191	28.7187	40.2768	5.20823	17.7011	12.1066	5.6061	5.22457	4.74263	4.86525	11.0346
PCHAS_0205300	93.5446	95.256	115.038	85.9387	104.178	41.928	55.7733	26.0602	41.7526	19.6508	69.7577	15.4814	157.732	91.4743	148.481	111.963	170.585	147.516	122.299	98.6569
PCHAS_0205400	199.932	207.597	190.608	215.317	174.241	242.433	257.657	299.443	206.957	332.735	198.594	279.172	60.2478	151.354	101.359	102.171	71.8647	86.5045	119.452	166.14
PCHAS_0205500	7.81654	9.63475	3.74241	5.9048	4.77723	9.39877	16.0674	13.6084	13.0502	13.8723	59.8524	26.7348	14.9663	36.4538	30.2263	18.744	23.4753	15.9486	6.44113	5.81028
PCHAS_0205600	54.7189	81.2952	75.6528	66.0579	94.8965	36.5317	51.5578	47.8496	30.8923	34.3684	33.4027	32.9954	39.3645	38.3525	37.7295	40.941	30.3579	65.3612	67.766	66.0193
PCHAS_0205700	0.973781	2.72357	1.33813	1.62282	1.20575	6.45766	10.8818	18.8758	11.5283	19.5018	57.6141	42.0867	2.86455	7.15615	12.0684	3.35962	4.03232	2.40273	0.379332	1.82496
PCHAS_0205800	12.0963	16.7723	17.0114	16.0006	16.9987	8.57521	11.2145	10.7333	9.10863	6.98161	4.61534	7.17693	3.07236	0	5.67914	7.69572	6.0239	11.8778	14.4568	16.5396
PCHAS_0205900	5.37156	9.37246	2.12275	3.32139	1.46777	19.0477	29.5055	51.1887	29.1466	61.2988	218.193	117.634	22.8411	36.1851	48.8192	16.3813	13.3503	12.1494	3.40995	4.13334
PCHAS_0206000	1.5086	1.7443	0.73645	0.890849	0.716258	1.23303	1.47551	1.40944	1.21984	1.14478	1.70393	1.31525	2.06161	3.58679	1.96589	2.56595	3.65718	2.2991	0.887263	0.762251
PCHAS_0206100	24.8972	28.8889	28.2997	26.1475	29.5603	19.3475	22.0398	24.3986	10.0276	24.757	15.304	18.7868	15.461	14.524	14.5214	16.0725	22.2136	20.0762	20.7503	26.0597
PCHAS_0206200	43.5859	52.6005	60.8081	58.0266	60.9939	33.5747	37.6867	35.4095	25.7281	33.6601	18.6142	25.5737	8.62474	7.37105	12.12	15.3251	11.2736	20.924	41.6771	42.5296
PCHAS_0206300	2.67358	5.87538	1.69804	1.50034	1.15604	9.28712	5.44336	4.09469	9.11874	10.8017	114.637	28.7396	20.9152	61.7499	59.2281	8.80052	18.64	10.8377	1.63661	2.95265
PCHAS_0206400	66.7264	79.2904	20.6657	65.7741	18.154	297.544	247.093	407.245	388.913	432.438	402.324	489.782	62.5167	136.364	152.675	79.7703	74.3988	38.3857	18.7402	27.5307
PCHAS_0206500	37.7236	55.0672	64.4675	44.256	80.9324	11.7405	25.2501	15.7147	11.5953	10.3863	11.2386	12.6788	15.7402	13.2202	19.5082	27.3384	26.6046	40.2182	53.1033	50.0094
PCHAS_0206600	172.418	168.763	175.586	179.611	150.39	197.674	192.164	234.724	212.919	197.854	119.739	200.446	42.2825	51.4942	81.0524	70.7988	56.6499	70.2061	102.512	154.849
PCHAS_0206700	0.960135	1.38466	0.426858	0.15715	0.272445	0.625347	0.427616	0.857782	1.04195	0.893217	37.114	4.51541	30.1722	24.2545	17.9977	4.06674	8.5906	6.51491	0.171424	0.618538
PCHAS_0206800	0.672626	0.862249	0.170878	0.12582	0.145419	0	0.171182	0	0	0.286055	1.74792	0.985959	1.19589	3.8838	1.4737	1.6931	2.50106	1.30401	0.960734	0.495222
PCHAS_0206900	10.156	10.4286	12.5779	11.602	11.7234	5.39975	5.72319	4.87613	3.03652	4.78191	2.88006	4.25342	6.19085	0	6.97563	10.4644	8.9351	10.6117	11.0276	12.351
PCHAS_0207000	67.8209	89.4977	90.6528	84.4516	103.812	49.2731	62.3851	52.0106	41.3702	38.2688	27.998	34.1127	28.1356	17.9165	23.7943	41.4558	41.8243	47.8513	67.1131	66.2513
PCHAS_0207100	79.5883	87.3583	80.6051	82.9753	91.6194	68.3514	76.1564	76.8327	74.2269	70.1813	42.0579	64.0758	11.8925	40.6552	33.6385	36.4689	26.999	37.6934	75.9653	79.7031
PCHAS_0207200	65.3008	77.0762	77.4852	68.4148	78.7733	28.0834	43.023	41.4925	14.7956	48.2594	89.7889	41.1579	187.631	76.4425	96.0845	97.1278	96.6957	120.972	83.1189	77.7899
PCHAS_0207300	35.9116	64.7492	56.983	54.6686	58.6556	20.0301	44.471	46.6034	23.1296	36.0705	581.849	71.8992	192.947	200.613	205.978	35.0216	48.921	48.807	29.6085	43.6367
PCHAS_0207400	0.370296	1.61394	0.98776	0.775785	0.336237	0.514513	1.45129	1.8526	2.08963	1.65354	40.116	6.07928	7.55799	11.9735	14.892	2.81061	4.09625	3.56334	0.423124	0.954209
PCHAS_0207500	0	0.97311	0.337485	0	0.287203	0.65922	0	0	0	0	0.767144	0	0	0	0	0.514442	2.4698	0.936519	0	0
PCHAS_0207600	79.6912	111.081	103.086	105.605	119.059	89.0077	121.015	148.825	90.6501	131.66	146.758	151.471	42.1216	53.36	60.9466	49.1262	27.3337	54.7845	67.8839	83.6573
PCHAS_0207700	19.5593	22.0403	3.08557	4.1308	5.84849	3.28754	5.6201	3.19422	5.4777	3.52183	18.81	14.0271	27.091	184.889	40.0506	63.7107	114.445	58.1858	14.1939	8.12936
PCHAS_0207800	38.2781	40.2914	42.4195	46.1528	41.1109	28.2697	30.9962	27.5452	25.5818	26.9008	10.2097	18.8128	5.30876	4.53708	11.286	15.2146	14.6088	16.6184	20.8434	33.8435
PCHAS_0207900	52.2548	48.0852	57.8653	54.0722	52.4499	30.2198	29.1853	24.3599	24.3997	22.0308	10.3333	15.071	13.4989	6.84993	21.3712	35.6042	28.1212	37.4956	42.6844	55.7542
PCHAS_0208000	13.9474	14.1313	12.3313	14.9517	12.9157	10.774	12.7403	11.3898	9.69045	11.233	3.83323	6.75695	2.16364	4.79094	2.96253	3.53449	3.59944	3.70464	7.90089	10.3343
PCHAS_0208100	0.28938	0.582939	0.330822	0.270653	0.281533	0.359003	0.662819	0.295465	0.179452	0.30767	0.919111	0.282789	1.029	1.6709	0.704469	0.672382	1.07602	0.663022	0.472379	0.372849
PCHAS_0208200	36.7481	38.6096	42.9361	42.331	40.6264	31.6994	38.3465	39.972	20.606	34.2326	17.7001	24.354	14.6678	23.1562	19.6652	20.0785	22.9005	25.2431	26.4196	33.6391
PCHAS_0208300	33.5493	54.9841	56.8925	41.3345	66.4114	19.9149	33.0361	28.3288	18.4346	25.2849	45.4922	23.2401	58.4908	51.4942	48.2455	54.1064	46.5174	73.5243	70.1607	47.6037
PCHAS_0208400	32.6079	34.0668	30.0578	36.1683	31.0122	30.1357	38.0164	46.6822	22.1843	50.5402	31.8951	41.951	6.82577	26.1981	12.8296	14.3267	16.5464	14.0247	21.6495	26.0175
PCHAS_0208500	4.9009	6.00938	3.03144	2.7901	3.0635	11.4727	20.8782	20.8135	23.5866	18.713	63.0942	39.3553	13.2596	17.225	20.3342	13.8629	24.2647	16.8245	3.95659	4.39271
PCHAS_0208600	159.845	174.449	188.243	176.333	208.429	95.6205	118.295	116.377	67.1544	105.437	69.2558	83.9931	140.568	68.0827	121.616	150.082	124.031	157.171	188.803	177.165
PCHAS_0208700	0.975559	1.09426	2.06015	1.75642	1.38411	0.423595	0.868971	1.30734	0	1.63362	0.369708	0.417086	2.12474	0	1.24683	2.31396	1.58702	2.40712	0.174178	2.82814
PCHAS_0208800	20.6311	25.6652	17.7033	25.0536	17.3318	27.8377	37.7419	45.5839	26.8429	59.6019	65.1267	68.8568	9.66319	15.6912	20.1303	14.8836	12.8114	12.0422	12.5952	17.0067
PCHAS_0208900	12.2191	14.026	11.6353	12.6536	11.9465	8.03499	12.5847	16.8472	6.66208	21.5545	19.9476	20.2434	7.78647	8.90408	9.20992	10.5501	9.17439	10.8713	11.4535	11.3157
PCHAS_0209000	85.3723	92.801	91.8534	98.7915	91.0273	57.2889	79.4615	84.3475	35.6746	100.386	43.2508	62.0151	32.5302	51.3808	37.9286	48.5461	43.8995	55.689	69.4752	85.9748
PCHAS_0209100	17.2961	22.5417	17.7713	18.118	15.4144	21.5289	27.2179	40.2904	18.1444	36.4721	45.5431	39.1097	7.41449	23.3028	14.2458	10.8098	11.5674	10.3136	6.58789	13.8662
PCHAS_0209200	87.3638	106.075	104.837	100.444	102.385	88.2043	104.391	121.835	87.8715	93.0366	101.927	110.535	31.8231	43.0624	56.2821	59.6873	39.2857	53.4528	72.5374	86.0239
PCHAS_0209300	80.7857	82.8483	73.8132	82.4361	87.689	80.3159	71.4629	96.2316	94.3208	87.0763	69.8172	89.5625	18.0282	45.0378	43.6732	49.0844	29.0031	52.2388	78.7827	80.3986
PCHAS_0209400	78.2218	73.2909	89.0264	77.4695	87.6002	45.6977	45.8591	38.9651	47.537	38.9518	48.5798	40.8607	50.6226	63.2322	70.0412	86.7444	76.8124	88.9583	97.1006	94.7371
PCHAS_0209500	22.8381	22.1237	18.9222	22.768	17.8704	26.4815	23.5792	32.2282	22.8128	32.6421	27.9975	31.7333	5.97534	15.7344	13.8203	19.9621	16.0431	16.6492	18.4416	21.2332
PCHAS_0209600	33.8934	35.7442	36.1641	37.7001	31.9393	40.5393	41.9551	48.6981	33.0656	39.4236	28.673	39.9164	9.04524	31.0704	13.3377	19.2279	12.5053	15.0015	22.1593	31.0639
PCHAS_0209700	47.628	49.5272	53.1091	45.5011	46.8765	31.2376	36.7875	25.9206	27.7109	23.7965	26.5906	22.7834	46.4257	44.8731	40.1081	42.5849	37.9274	59.855	43.7667	58.6481
PCHAS_0209800	21.2508	30.6873	26.0652	31.0153	36.4823	15.9015	18.8541	21.0115	9.1153	17.3786	7.72449	12.0661	6.48127	13.5799	6.1548	8.99385	5.19238	13.0569	25.0744	26.9475
PCHAS_0209900	837.912	780.911	779.708	876.554	758.126	959.947	862.969	851.468	950.346	836.052	325.245	629.592	154.101	391.583	295.561	335.969	283.69	317.177	570.395	713.035
PCHAS_0210000	20.7542	20.8214	18.4538	21.2678	18.2308	20.6875	22.0232	27.6245	18.6058	29.1462	17.6911	23.7646	7.18739	14.5888	11.3789	15.7772	10.8627	10.7985	13.662	17.9045
PCHAS_0210100	12.7279	13.8861	13.7853	13.6519	11.2704	10.7004	10.493	8.14526	6.17158	8.56572	4.72089	6.71522	2.52776	10.9456	6.69143	8.90094	7.0487	9.35474	13.3447	15.3524
PCHAS_0210200	22.1922	24.2196	23.3989	23.5609	21.0473	12.631	18.8325	21.2553	11.228	19.4179	11.2893	13.3344	5.78513	15.1516	11.8818	13.5152	12.4405	14.9843	14.9922	20.3824
PCHAS_0210300	32.0066	42.1057	42.2505	39.9501	41.5615	25.9885	37.7744	48.7771	16.872	41.0682	34.9272	40.5681	14.4438	23.6015	16.9161	17.5603	18.0485	22.6475	24.083	33.2918
PCHAS_0210400	18.8738	22.9409	23.796	22.1523	20.9906	7.86959	13.6468	14.5611	4.528	12.3242	25.1679	10.0342	12.9009	17.1279	17.1644	16.6566	14.954	17.6144	16.9943	20.6218
PCHAS_0210500	768.421	691.804	749.175	748.103	738.058	496.315	504.429	396.98	432.619	372.388	325.119	302.006	753.017	414.113	743.135	820.835	780.638	803.682	839.733	823.254
PCHAS_0210600	4.49003	5.45048	4.24652	5.39581	3.83012	4.28189	7.31996	10.5268	2.79176	14.6076	12.0962	12.4242	1.5119	2.4069	2.96314	1.96939	1.54998	1.73382	1.63308	3.37594
PCHAS_0210700	11.1428	15.7126	9.01611	12.256	11.9729	12.3861	17.2702	25.352	11.3669	18.5763	21.1704	23.2481	3.05093	9.00756	8.54476	7.40042	8.70094	5.77377	4.77471	7.8963
PCHAS_0210800	110.183	114.967	118.248	127.162	140.378	96.5743	117.317	121.482	80.0854	110.99	53.603	83.2587	19.1342	62.1407	32.7489	42.7182	40.017	47.4187	93.6944	92.1113
PCHAS_0210900	68.8575	111.563	105.444	91.4144	113.253	34.051	68.1492	61.5171	35.287	47.6879	31.4106	44.1585	20.234	57.9817	30.9645	28.5171	31.1156	45.4248	60.7867	81.9417
PCHAS_0211000	1.84026	7.07716	2.04536	1.80723	2.43687	2.39716	2.45879	3.28816	0	2.0544	4.64936	4.72065	5.72575	37.1903	3.91994	3.11783	11.9748	4.5407	3.28563	2.37106
PCHAS_0211100	60.0821	56.7178	55.7219	56.6642	51.5776	35.99	42.8013	41.453	21.2794	42.3903	21.9936	34.3929	16.3585	43.5463	24.7242	35.582	32.7164	39.2994	39.8565	54.4153
PCHAS_0211200	4.8626	7.34161	3.07459	4.38622	1.71708	3.56588	4.23507	8.36668	4.22158	8.36381	54.2734	16.2619	11.0277	34.9403	19.1505	8.78763	10.1956	8.93192	2.77817	2.22762
PCHAS_0211300	31.7958	42.6913	32.1574	41.4362	35.5761	49.9895	49.9324	72.3396	36.6313	68.8606	60.7624	82.465	9.75225	12.1814	21.0568	10.825	9.31537	9.29547	15.0666	27.9586
PCHAS_0211400	117.52	118.685	111.39	129.978	103.641	164.326	155.372	191.437	142.424	155.924	86.2095	152.619	55.5342	96.4463	75.4293	69.3739	70.6488	81.5452	77.0269	95.7696
PCHAS_0211500	206.477	249.116	245.149	244.12	234.817	159.267	235.847	202.551	212.21	169.94	138.086	151.627	176.857	122.728	156.265	187.669	160.043	187.304	198.636	204.22
PCHAS_0211600	7.67802	11.2298	2.22222	4.79065	2.37853	12.0824	20.8387	36.9217	11.9672	50.9303	75.1717	66.9744	11.4156	33.3245	25.1582	15.2608	16.9334	11.9836	3.31211	4.48158
PCHAS_0211700	48.1385	54.7473	57.9486	54.9514	53.798	39.446	45.2977	32.9351	50.9012	33.4383	24.9478	35.4625	27.6512	29.9336	44.5917	59.5582	43.3721	58.1707	62.0583	50.5731
PCHAS_0211800	83.4103	93.8875	100.448	87.6614	91.9602	40.411	62.0445	56.6515	26.2026	52.9292	85.9201	51.802	179.389	82.8044	118.698	122.97	112.599	135.761	105.761	92.7629
PCHAS_0211900	75.7739	90.9989	93.158	73.4288	82.7972	32.3077	43.3722	33.2371	32.655	15.6764	70.3561	24.3262	170.566	77.396	120.035	111.787	113.032	126.05	106.472	76.8353
PCHAS_0212000	70.6877	65.4659	69.1781	74.4194	64.594	57.6146	61.8973	68.6825	43.2315	70.1079	45.8584	57.1135	61.1349	81.7178	61.1221	62.5196	65.5364	68.8243	58.1835	72.5528
PCHAS_0212100	211.069	199.369	220.271	202.674	226.68	167.217	215.054	131.005	136.629	170.866	76.7144	103.854	25.8078	164.635	112.321	115.436	103.611	121.976	207.331	206.586
PCHAS_0212200	20.3476	25.5803	22.4233	21.0882	24.3732	10.3701	17.7746	14.4118	8.86672	12.1616	24.2152	13.9726	11.733	22.2276	14.8603	16.7177	17.1256	20.4508	23.0036	19.536
PCHAS_0212300	2.59524	5.98837	1.38455	0	3.14205	1.80299	0.924674	0.618287	3.37967	0.772594	15.2117	8.87644	9.04375	20.9791	10.614	12.6632	16.8875	14.0878	4.44823	1.33752
PCHAS_0212400	0.947759	1.39949	0.448024	0.235632	0.417584	0.43757	0.448819	0.585919	0.390579	0.517861	1.22452	1.39512	1.64239	9.69798	1.88083	2.92689	3.51295	2.23492	0.771103	0.772868
PCHAS_0212500	119.262	128.497	130.765	130.294	135.643	113.1	109.49	110.688	111.163	91.4826	55.4562	70.0704	27.318	29.573	54.8603	90.2443	83.3185	64.9921	114.957	133.865
PCHAS_0212600	41.0767	55.498	55.9683	49.7229	57.5244	17.5792	32.9035	39.426	16.8367	34.09	23.0703	33.6074	17.8376	14.9304	25.0533	27.5371	26.2003	38.8279	43.0537	46.1665
PCHAS_0212700	110.032	116.468	114.949	116.739	108.783	91.8921	101.16	93.1585	75.4239	97.0743	44.1903	68.1508	55.1827	74.214	59.6815	78.9925	73.4578	85.0732	87.1291	105.495
PCHAS_0212800	189.55	195.235	159.612	222.776	123.854	208.874	259.819	288.675	139.903	308.975	206.779	240.255	53.3225	119.829	94.0342	42.322	43.0951	32.9773	48.4927	127.41
PCHAS_0212900	110.763	119.956	89.6563	133.03	88.4367	261.366	270.807	287.539	281.852	339.402	585.924	431.093	96.9705	231.562	202.417	118.548	129.237	104.607	80.7396	97.4373
PCHAS_0212920	4.99139	0	2.21908	0	1.88846	4.33459	4.44603	20.81	5.41674	18.574	30.2654	8.53597	6.21205	100.872	12.7586	6.76527	8.11988	9.2369	7.12936	0
PCHAS_0212940	0	3.2437	2.2499	9.93975	1.91468	4.3948	4.50778	3.01415	5.49197	0	2.55715	17.3091	6.29833	0	4.31194	10.2888	0	3.12173	3.61419	0
PCHAS_0213000	383.991	392.358	326.81	393.92	267.514	443.32	492	604.536	369.466	696.447	331.406	510.644	319.529	339.862	398.98	319.619	320.998	322.739	314.935	333.204
PCHAS_0213100	63.7152	114.093	20.0942	48.3626	14.6897	602.073	650.895	1051.41	902.988	1180.9	1626.35	1915.35	136.292	482.864	494.021	154.501	121.142	86.2211	22.6094	55.5412
PCHAS_0213200	886.061	887.376	1000.93	913.428	902.708	735.143	758.94	794.176	578.077	771.072	1222.93	800.395	1774.83	909.88	1272.62	1101.08	1148.03	1165.48	901.989	1027.98
PCHAS_0213300	119.493	155.698	80.1904	101.277	74.1869	582.737	673.88	848.101	990.522	1185.23	2488.3	2069.85	207.187	592.269	806.525	230.757	187.754	136.051	71.6364	107.052
PCHAS_0213400	108.591	110.616	73.217	90.3001	65.8132	282.459	266.494	377.228	376.06	428.986	637.64	675.933	113.583	499.232	296.427	224.843	253.398	160.425	100.952	87.9705
PCHAS_0213500	212.313	233.142	239.413	229.26	205.055	194.239	195.298	169.106	162.962	162.474	343.999	141.35	329.803	223.142	316.642	194.766	235.048	231.77	191.28	218.883
PCHAS_0213600	22.346	31.6787	28.9857	20.3098	25.7612	9.36035	13.1136	4.07106	15.1207	5.67405	286.799	31.9206	479	164.7	299.708	122.397	171.496	122.599	49.1905	36.5821
PCHAS_0213700	12.6357	18.3465	20.1774	13.5062	16.1955	10.973	12.1739	11.2119	15.6714	14.9696	129.649	22.9317	37.8702	99.0162	75.5825	31.4563	39.8524	26.0873	25.7827	14.9513
PCHAS_0213800	1.85273	1.05558	2.19651	0.269552	1.40194	0.357543	2.20041	1.71653	0.893609	0.306419	8.11352	2.81639	14.3474	0	4.56042	1.67412	3.34888	5.07942	4.41053	1.85666
PCHAS_0213821	19.9816	21.9735	15.938	17.1861	13.341	46.6132	52.523	84.1239	42.3059	64.0044	66.8158	131.66	11.7027	51.4666	14.1877	10.3552	9.87919	6.52542	10.213	15.2704
PCHAS_0213841	4.88376	6.80496	3.20965	3.05838	3.85615	12.1702	18.5355	61.7163	11.5216	25.2849	82.4009	146.703	12.6847	34.3295	8.32234	4.6048	2.07256	4.19141	3.94275	4.10376
PCHAS_0213861	4.85828	6.7469	1.07995	1.85542	0.919049	9.49276	12.2612	26.7656	12.302	15.9695	46.2332	68.5439	9.06959	8.18186	8.62387	5.21301	5.2689	3.99581	1.44568	4.17307
PCHAS_0213881	3.30495	8.20855	2.20398	2.16375	0.937805	0.358759	1.83991	1.72237	2.68994	1.5373	137.147	14.1298	140.363	58.4419	98.2066	17.0781	40.3232	25.9932	3.54043	5.85508
PCHAS_0300100	80.7439	75.2247	86.9624	69.6899	90.0117	39.1088	52.27	35.4925	36.0372	32.501	71.2553	31.8953	330.627	36.7724	173.64	184.351	154.663	169.485	159.187	103.741
PCHAS_0300200	0	0	0.183665	0	0.156301	0.358759	1.83991	0.738159	0.448324	0.922383	1.04373	0.706492	0.514149	0	0.351995	0	0	0	0	0.26614
PCHAS_0300300	0.215349	0	0	0	0	0	0.383641	1.02609	0.467402	0.641089	1.74104	0.736556	0	0	0	0	0	0	0	0
PCHAS_0300400	0.595378	0.763224	0.882313	0.779588	0.450514	0.68938	2.47486	3.30965	2.15371	4.43106	2.80785	4.07272	0.987973	0	0.338191	0	0	0	0	0.255703
PCHAS_0300600	0.19097	0	0.169804	0.250056	0	0.663366	0	1.13741	1.24346	0.568513	0.192992	0	0	0	0	0.258839	0	0	0.545538	0
PCHAS_0300700	19.194	20.437	17.9059	21.2872	16.6667	28.6003	31.391	37.7315	23.9029	34.0342	26.4989	36.9499	12.7925	21.1965	17.6946	17.4857	17.0625	14.622	11.5354	17.0274
PCHAS_0300800	5.88308	8.02816	4.21856	8.94577	4.02084	16.1509	31.4418	40.9171	18.9473	34.745	23.2061	20.1218	2.83425	0	4.85093	1.02888	2.4698	2.3413	1.35532	3.17871
PCHAS_0300900	18.7741	27.0138	2.55509	9.78297	2.60929	169.026	209.889	271.102	288.146	280.02	248.003	282.405	24.3191	61.9447	59.415	17.3969	19.3221	8.27209	2.46266	8.14539
PCHAS_0301000	300.035	309.083	203.694	316.497	214.293	774.877	816.222	1033.53	835.214	1084.72	765.625	1163.99	95.7845	218.723	296.115	140.173	103.683	109.044	164.893	211.494
PCHAS_0301100	11.991	16.611	2.23557	9.62319	2.19518	126.301	146.087	236.371	155.314	257.362	251.154	273.196	18.7746	54.7195	51.0841	17.301	13.2142	7.63531	4.69614	5.98052
PCHAS_0301200	10.4588	24.0034	4.19981	9.49798	2.93585	115.437	166.187	250.576	142.059	254.86	329.361	288.484	18.895	27.2729	59.7922	17.6054	18.6607	13.3194	4.33703	7.17247
PCHAS_0301300	0	0	0	0	0	0	0	0	0	0	0	0	0	0	0	0	0	0	0	0
PCHAS_0301400	105.255	71.4275	61.6408	101.057	54.5627	74.4341	88.0257	79.6325	55.0315	87.632	15.7491	32.5735	4.46399	17.4969	10.9599	12.1538	10.8651	10.2235	22.0826	62.3092
PCHAS_0301500	54.6773	43.08	37.5677	58.2943	38.5117	61.9338	62.7561	67.4483	52.0662	65.1412	25.2257	39.1764	8.87594	21.8377	9.57526	17.2823	11.6019	14.931	29.1707	38.2872
PCHAS_0301600	64.8318	50.7834	28.7899	58.7104	19.1374	152.123	144.604	179.338	120.958	194.557	70.042	115.337	6.6852	21.108	25.6809	12.6399	11.4084	7.45533	15.771	26.2419
PCHAS_0301700	155.886	103.698	84.8186	145.271	63.4581	170.498	163.881	205.8	127.736	195.62	56.5139	119.359	11.478	31.5902	25.1724	17.744	22.5047	10.8959	26.1226	81.9711
PCHAS_0301800	10.1357	10.5707	1.22201	5.62362	1.29993	69.0735	79.1126	100.58	65.8104	111.873	91.7535	111.64	6.62794	13.8872	18.2968	6.75251	10.8992	4.0269	1.34957	2.54546
PCHAS_0301900	140.651	97.1818	72.5704	130.84	49.614	143.295	160.772	178.591	91.1973	167.702	42.8704	97.6479	6.22305	26.0777	17.0416	11.6962	19.4173	7.2633	16.703	68.8931
PCHAS_0302000	40.7371	31.2483	25.1541	42.352	19.016	41.1091	41.242	39.2588	26.1977	35.0907	7.05201	16.2877	2.934	9.52857	4.49941	3.32311	5.82934	4.12999	6.06106	21.8698
PCHAS_0302050	519.988	479.604	441.623	545.266	419.316	803.306	729.295	946.228	701.403	1020.96	453.163	828.98	213.243	306.82	328.939	310.135	250.508	280.956	364	441.526
PCHAS_0302100	18.7879	22.6248	3.37485	13.1702	2.58482	160.19	199.469	218.827	236.429	277.96	196.581	249.25	14.6436	76.705	58.8579	16.7194	21.6107	6.08737	3.52383	8.55806
PCHAS_0302300	18.4521	29.0436	18.2761	22.632	20.8553	36.1049	52.429	84.5817	34.9796	68.4905	91.3492	65.5081	19.1857	56.6437	25.0756	8.54766	12.159	8.64479	5.6715	16.2509
PCHAS_0302400	78.8564	110.383	25.7899	65.2759	20.4042	523.046	551.026	833.795	721.005	869.869	1032.55	1191.22	97.013	247.288	298.875	105.96	85.5214	62.0618	20.7142	48.4653
PCHAS_0302500	80.3184	115.015	28.3923	61.5623	24.755	575.69	592.236	798.302	740.672	842.409	1218.72	1287.12	108.25	443.404	376.223	125.59	103.253	67.1877	30.7789	56.5384
PCHAS_0302700	4.0579	7.71313	5.97208	5.86308	4.55289	6.56182	7.22907	10.3342	7.59258	11.2471	2.96959	7.65746	0.696589	5.65567	1.19224	0.379312	0.455262	1.03578	1.99863	5.76922
PCHAS_0302800	1618.48	1346.54	1271.76	1707.98	1069.11	2267.99	1909.61	1909.65	1989.12	2002.55	720.157	1421.51	179.502	588.071	437.931	336.531	272.707	245.641	550.486	1155.75
PCHAS_0302900	27.9805	28.9568	18.773	17.8358	19.4117	8.67459	15.6719	18.5243	9.60838	14.4461	40.6658	23.6827	30.7971	77.9953	33.8507	49.0018	64.4456	50.8346	20.5097	19.671
PCHAS_0303000	30.8675	56.487	56.2848	53.5977	61.1006	24.0864	41.0433	64.6127	20.1473	39.9529	43.2878	47.4325	19.4865	9.04073	16.9619	18.0386	13.0995	26.4916	29.3927	38.6182
PCHAS_0303100	54.204	68.8415	73.1868	80.1751	73.296	67.1205	81.3637	68.1547	58.8231	72.4642	42.605	56.6478	7.49553	40.5712	13.6842	12.2446	9.79754	19.1948	40.8612	56.2589
PCHAS_0303200	26.9835	25.5617	28.0565	26.1917	23.7342	13.0485	18.4587	23.8646	8.28891	22.0392	30.2745	15.7387	13.0122	17.7133	19.097	15.6136	16.3974	16.6835	20.6568	24.2802
PCHAS_0303300	118.001	131.647	118.385	120.678	114.445	106.618	130.176	122.134	85.3711	122.974	112.598	131.718	82.3391	113.083	106.291	90.7872	94.2405	108.017	105.311	117.898
PCHAS_0303400	55.9267	89.4356	77.6058	86.5451	91.2637	72.1155	121.27	147.034	77.2452	113.097	103.047	120.761	38.6688	68.4993	37.0626	30.6273	34.0028	38.6804	49.6236	58.9568
PCHAS_0303500	765.708	704.024	381.505	659.481	296.193	1875.62	1489.92	1797.48	2245.02	2021.08	1573.65	2129.01	318.75	1494.08	899.883	650.434	856.912	404.739	214.966	374.216
PCHAS_0303520	7.59107	3.2437	0	6.6265	0	0	0	3.01415	0	0	2.55715	8.65453	0	0	0	3.42961	0	0	7.22838	0
PCHAS_0303600	75.4169	75.4754	72.8748	90.9931	67.9012	68.3873	87.2971	84.8373	58.6703	82.3096	32.5568	58.2597	10.446	29.9336	19.9821	16.3952	10.0398	14.6188	31.3817	59.638
PCHAS_0303700	137.48	130.433	143.186	134.278	136.524	85.7159	98.4814	99.6339	66.4253	81.5688	133.592	65.7653	298.73	116.575	205.335	195.678	203.318	212.113	150.365	163.716
PCHAS_0303800	94.8883	66.7275	15.4279	10.3657	24.4533	11.4893	19.5123	18.3433	12.9454	14.3661	89.0983	50.0726	94.4749	705.686	159.11	286.618	432.215	262.225	55.9167	21.6571
PCHAS_0303900	8.18515	19.293	13.8515	15.7307	16.7826	12.3819	21.8726	33.0246	8.88266	17.2927	25.2157	27.9955	4.27191	5.336	5.62427	1.78936	3.00671	2.76884	5.65699	7.31422
PCHAS_0304000	0.723916	2.06222	0.57216	1.05322	0.912962	2.37494	2.14941	2.97023	2.09495	2.87344	4.06434	4.12666	0.800847	6.50214	2.46723	1.96238	3.66381	2.18314	1.14888	0.829087
PCHAS_0304100	27.3834	30.3105	29.8589	30.2107	30.0233	24.4529	30.902	38.4367	14.2554	39.2056	29.0349	29.9524	6.53936	13.6137	13.7752	10.5	9.86275	11.1364	15.9722	26.7761
PCHAS_0304200	199.944	211.344	161.018	213.579	161.414	184.677	237.074	262.46	170.826	245.4	250.582	229.454	147.886	363.31	199.875	215.137	258.214	236.395	138.096	143.779
PCHAS_0304300	2.98971	6.94651	1.74454	1.95737	1.97949	0.486808	1.66441	1.55808	1.0139	2.086	5.19298	5.11283	7.20916	15.105	6.52761	8.23108	10.6391	6.80057	1.86826	2.28716
PCHAS_0304400	7.30992	7.92904	4.4998	5.89022	3.82937	1.95324	2.00346	2.67924	2.44088	1.67395	19.8889	11.5394	19.5948	68.1822	18.206	13.7185	16.4653	24.2801	8.03153	5.07144
PCHAS_0304500	68.7075	97.3583	95.9081	89.3852	99.7313	55.4322	83.7066	94.1647	57.4051	75.6578	90.7881	81.8706	126.15	47.7773	75.034	73.8994	72.5916	100.078	75.344	83.0045
PCHAS_0304600	14.6788	18.1508	20.213	16.4139	19.9045	4.06107	8.9095	5.18369	2.81941	5.70398	2.55988	3.55437	5.82006	5.25039	4.86995	9.24345	8.6641	11.2983	16.7915	15.5653
PCHAS_0304700	1018.1	1047.42	1038.87	1004.82	1028.48	813.784	916.167	816.751	805.952	880.176	573.812	737.243	684.103	727.636	780.239	947.712	762.221	944.958	1091.8	1059.71
PCHAS_0304800	28.791	30.2521	30.0764	25.1326	32.2619	14.7556	15.1349	13.1186	9.21968	8.66466	7.94968	12.3764	7.83212	44.5127	13.405	24.3094	19.4513	23.8739	27.6401	27.3655
PCHAS_0304900	42.8278	68.627	70.2117	63.5268	94.6899	29.9282	50.666	51.0164	23.2387	39.3448	28.2343	37.7652	23.3194	27.0475	17.3903	29.9312	20.6837	34.468	47.7909	51.3012
PCHAS_0305000	1.17919	0.944767	0.524248	0.38601	1.00382	0	0	0	0	0.219402	0.29792	0.504147	3.30204	0	1.50708	1.99783	1.91829	2.18218	2.31589	0.759661
PCHAS_0305100	3.37381	7.86351	2.18172	2.40964	3.01708	2.66351	1.63919	0.730703	2.66277	0.913066	9.60867	3.1471	6.8709	49.5871	12.5438	24.5269	35.9243	14.3789	5.257	4.34695
PCHAS_0305200	0.960557	2.18907	0.379596	0.419251	0.8076	0	0.76054	0.127135	0.463294	0.476592	2.58861	1.46017	2.39093	21.5691	2.54624	4.33976	5.20871	4.7402	1.37199	0.137513
PCHAS_0305300	79.1352	74.0597	80.0406	73.0088	80.8234	66.0386	66.3003	61.2966	59.4882	64.9953	38.6967	51.9272	35.449	43.4435	49.2248	60.6404	52.893	59.1747	74.8425	75.9947
PCHAS_0305400	377.967	441.53	437.219	453.371	440.32	305.406	390.764	398.408	349.191	390.581	311.438	415.417	324.881	366.352	270.301	291.159	268.36	402.563	403.926	415.166
PCHAS_0305500	35.6888	42.6754	37.7898	43.0879	31.8691	51.4879	53.8371	63.7686	35.8149	60.1196	51.2884	60.7047	9.07437	11.633	14.0598	15.2138	11.8613	9.70547	13.5661	33.6219
PCHAS_0305600	124.136	142.341	137.111	132.14	132.451	120.986	133.112	114.183	116.301	133.375	75.5111	112	54.8325	60.1608	86.746	95.6257	97.8234	113.484	126.709	141.915
PCHAS_0305700	12.3432	16.4558	9.6581	12.9298	12.3287	45.4486	60.6902	89.3953	55.7234	88.1888	248.48	170.558	23.3499	39.9115	63.1015	21.4142	19.2765	16.4462	9.8729	13.9951
PCHAS_0305800	269.081	306.053	276.581	301.863	297.137	280.132	325.434	375.202	271.196	384.834	256.509	369.097	76.1138	173.38	141.602	139.953	98.0941	132.606	208.58	252.5
PCHAS_0305900	63.288	57.3277	60.618	63.6144	54.9316	51.5656	46.425	52.1067	32.2196	58.8077	29.3925	40.7459	44.4792	39.4987	46.2319	51.1525	50.7207	53.622	52.3767	58.3391
PCHAS_0306000	55.253	54.2389	52.4485	59.3126	53.2973	49.7116	45.669	47.4358	36.7332	34.8237	30.6858	28.943	35.3119	40.2387	38.1712	52.2876	63.162	60.4899	51.5466	54.1944
PCHAS_0306100	5.81562	8.02861	3.28162	2.7824	3.38508	0.776981	2.19163	1.73189	3.64108	3.16294	43.6269	7.65041	14.4757	31.6426	26.491	16.826	13.8272	14.0736	5.59101	3.89064
PCHAS_0306200	9.35959	10.6031	11.8336	10.8304	12.1646	4.0505	5.42873	1.77793	3.10452	2.91592	2.13685	2.33978	1.39318	6.28407	3.02034	4.46746	3.6421	5.10218	8.21659	9.65544
PCHAS_0306300	25.9337	27.5651	32.6717	31.637	28.0721	14.9799	16.3122	13.0887	14.3603	13.9811	23.8203	17.3764	51.3179	14.3262	26.4756	30.266	24.6019	30.6099	25.3134	31.2828
PCHAS_0306400	65.269	78.5764	106.986	68.3706	95.3406	28.5867	46.5102	29.0711	27.1006	17.7408	55.6359	29.118	159.636	68.8194	94.782	83.8493	90.4823	114.133	85.1192	79.7076
PCHAS_0306500	57.2886	78.5272	84.7021	74.8404	89.8025	24.5879	42.8976	29.6293	33.0236	24.617	28.0785	17.1959	60.925	37.4334	43.063	59.357	43.477	73.4524	66.52	74.6653
PCHAS_0306600	247.252	259.125	170.221	252.186	153.394	775.996	619.756	786.435	1062.62	944.828	898.07	968.318	195.068	502.6	444.499	212.048	172.18	160.546	121.437	183.317
PCHAS_0306700	24.2991	26.4401	25.893	24.0007	22.122	15.5521	20.9284	22.3811	12.1259	20.7899	53.2119	19.2396	15.6208	49.4933	30.1265	18.5679	20.5427	19.7336	16.8343	21.5458
PCHAS_0306800	40.589	45.6766	47.9366	45.0331	41.7323	37.6697	35.8783	44.2895	38.3317	27.6715	20.979	31.7921	5.39857	0	16.3678	13.8584	13.105	17.2014	19.4724	35.9289
PCHAS_0306900	0	0.214459	0.0743768	0	0	0	0	0.0996413	0.181553	0.373527	0.253601	0.2861	0	0	0.285087	0.113376	0.272154	0.309593	0	0
PCHAS_0307000	4.37086	7.81035	2.11986	2.77489	0.651452	18.1735	32.2083	44.8079	27.0226	64.4682	228.688	117.105	18.4623	53.5345	56.0881	12.028	11.6353	9.96774	1.51347	3.66907
PCHAS_0307100	77.5657	70.0305	80.5097	70.1669	65.3589	75.5075	88.9639	80.4739	80.1026	96.756	217.092	147.803	96.7942	132.736	151.987	99.4794	102.099	93.057	75.051	92.4165
PCHAS_0307200	19.8567	35.1416	11.2801	14.4447	3.13027	106.529	131.18	143.299	221.235	255.91	1242.54	354.859	118.896	510.53	466.394	104.888	108.572	67.8444	11.3448	28.0005
PCHAS_0307300	20.6002	25.5115	14.4629	19.2235	12.3081	50.3496	65.1778	63.9009	98.729	106.419	486.121	176.146	50.2319	173.307	170.201	39.7341	40.0323	26.1046	10.2518	20.2969
PCHAS_0307400	55.5937	56.9094	42.5653	66.0709	42.0058	80.3352	77.6467	93.8681	65.6404	100.444	47.9286	81.4517	12.0767	22.8787	21.9788	11.4534	10.1291	9.37766	13.629	37.5076
PCHAS_0307500	60.5254	68.2153	62.8467	59.306	68.3907	40.5674	56.0835	45.7264	27.3313	45.3479	86.8233	42.3753	158.238	65.6738	87.2194	76.805	97.1399	106.995	62.662	71.4412
PCHAS_0307600	13.233	15.721	15.9632	16.4996	15.849	7.17319	9.60993	7.63055	5.9455	8.97035	7.49576	5.90982	13.9516	1.70337	10.7724	11.4241	12.4775	14.7139	13.4234	12.8689
PCHAS_0307700	8.44275	12.0887	12.6433	10.5377	15.0186	4.03035	7.65224	4.35214	4.07209	5.21784	3.29311	4.22172	1.96631	7.98231	2.8606	3.68056	3.37338	4.32474	7.96884	8.52426
PCHAS_0307800	103.672	147.357	140.008	131.773	152.956	61.7783	91.9588	70.7895	63.0792	70.3778	45.5903	56.3781	43.1885	105.195	62.0919	95.2453	74.7996	108.101	137.546	115.132
PCHAS_0307900	18.0382	22.738	27.8007	23.816	24.9099	29.7628	38.8294	42.795	32.2993	38.2606	48.6111	52.4413	9.35395	42.5295	15.6254	9.37202	8.31417	9.27246	10.9499	16.4625
PCHAS_0308000	112.47	129.166	122.524	125.874	129.203	90.8127	118.86	100.886	86.8864	78.233	46.7855	69.8572	35.9259	88.0559	57.08	70.1302	73.5402	91.72	101.91	106.315
PCHAS_0308100	61.0058	69.6729	80.8731	71.893	76.7972	41.4195	60.7625	69.0364	42.732	51.1817	28.584	44.5767	34.5114	44.8321	29.7701	35.3297	31.5773	47.2108	45.9447	62.8819
PCHAS_0308200	1.78613	4.68186	1.54076	1.08211	1.47258	0.27781	0.71238	0.603359	0.462888	0.396811	3.96032	2.00597	3.58325	7.54254	4.9063	6.46779	6.85212	5.19649	2.05618	1.30523
PCHAS_0308300	0.1981	1.07222	0.117429	0.115285	0.0666219	0.152918	0.0392123	0.0786585	0.0477736	0.0327631	1.08996	0.451704	0.767031	1.77931	1.16277	1.10384	1.86197	1.38492	0.251513	0.1418
PCHAS_0308400	101.301	116.829	128.621	110.119	127.536	63.8283	74.4462	63.129	55.6268	54.443	32.3978	43.3841	44.7641	56.1845	57.7392	99.974	86.2133	103.432	126.574	117.424
PCHAS_0308500	147.803	158.56	160.206	158.744	168.098	126.803	126.085	92.5521	127.931	76.4357	50.09	84.7635	70.5783	108.289	91.3116	125.584	107.509	138.274	166.784	161.668
PCHAS_0308600	78.1849	85.4131	91.1619	81.1276	93.7653	52.524	56.0644	55.353	46.9597	41.7201	29.0707	46.2509	22.6434	29.8125	25.5574	39.3225	24.798	45.8022	59.7	86.1647
PCHAS_0308700	105.441	99.7491	111.555	118.316	116.547	70.7031	71.5698	51.6711	49.826	47.4814	21.0417	37.4332	19.6009	26.9732	26.8383	46.8538	29.529	48.2461	78.7337	103.524
PCHAS_0308800	0.483893	0.775386	0.645389	1.10882	0.823848	0.21011	0	0.288206	0.525129	0	0.244508	0.413762	0	0	0.618445	0.491897	0	0.895476	0.863949	0.311734
PCHAS_0308900	0.723677	1.70077	0.375355	0.789652	0.365064	4.08494	4.72713	6.96816	6.67544	8.16863	46.0134	18.3576	4.05295	7.31249	13.0514	3.35128	3.92421	3.05043	0.516825	0.62161
PCHAS_0309000	432.26	499.048	520.169	476.24	549.924	325.407	411.724	382.705	256.708	358.416	243.208	298.411	453.48	273.324	322.209	389.988	344.693	426.136	455.104	468.446
PCHAS_0309100	1040.34	1093.59	941.1	1059.29	949.136	1169.02	1327.86	1526.88	1464	1520.55	1503.6	1661.67	568.649	1373.38	909.203	965.192	1049.08	979.331	847.785	949.188
PCHAS_0309200	2447.92	2433.38	2482.77	2411.77	2522.17	2598.82	2269.69	2034.46	2882.09	2141.49	1546.94	1916.49	2384.27	2252.12	2747.19	2834.21	2843.58	2595.99	3052.91	2690.18
PCHAS_0309300	13.4446	17.4904	9.01648	14.8816	7.0265	33.5423	36.9926	57.1388	26.3367	72.883	76.5417	71.2172	11.3441	36.8414	22.4253	15.0955	12.6038	10.9993	5.77728	6.34916
PCHAS_0309400	53.4198	62.6879	59.3146	59.334	52.3878	58.1613	69.1259	85.7944	63.7405	77.5367	58.82	77.7203	18.5229	37.5972	30.344	27.0167	19.4557	28.8538	31.6973	46.228
PCHAS_0309500	288.46	270.525	309.136	314.096	336.984	304.999	311.037	268.862	269.106	230.503	107.4	193.861	55.4253	204.547	80.202	94.6574	72.4474	96.7736	234.922	254.949
PCHAS_0309600	10.7085	12.8243	13.2801	11.6233	13.2207	4.0787	7.27939	5.53876	2.85429	5.31315	2.9428	3.05218	3.50719	7.59338	6.56295	8.53027	6.87647	10.7776	11.874	11.6793
PCHAS_0309700	0.951006	1.91574	0.3624	0.533678	0.616811	0.943849	0.726086	0.971001	1.47435	1.82	83.0644	6.04074	21.9807	10.9824	27.5501	4.60351	7.07235	5.36351	0.582151	1.05027
PCHAS_0309800	9.44666	21.5011	22.2847	11.8646	24.9456	5.02262	9.96006	13.3197	2.92905	5.16534	33.1211	6.59393	33.1112	23.3768	17.0835	23.5174	25.09	33.0606	20.1018	13.4134
PCHAS_0309900	3.0671	2.16247	4.09072	5.22088	6.96249	1.86446	1.63919	1.27873	0.665693	0.684799	2.47966	0.524517	7.63434	0	4.4426	4.78068	3.49264	4.1623	4.59988	3.95177
PCHAS_0310000	475.201	433.729	402.668	418.037	376.81	416.25	453.226	418.278	375.651	532.353	585.879	543.752	405.432	569.808	483.43	463.586	568.053	432.672	398.077	434.54
PCHAS_0310100	6.04461	6.01065	7.28339	5.25188	5.59978	3.23784	3.92492	3.97027	1.59395	3.11122	3.9392	4.83043	0.703069	9.13324	2.79173	2.83302	4.59497	4.04228	3.22755	5.2406
PCHAS_0310200	74.7225	80.5566	80.5268	76.0607	71.3262	102.724	116.183	160.72	107.738	127.337	122.476	149.008	21.0309	42.688	42.7444	37.5767	42.953	29.9686	53.1757	80.6265
PCHAS_0310300	80.9714	90.294	96.6079	101.696	103.94	88.6135	87.5798	98.6673	87.4232	79.3249	50.308	72.7687	17.9952	41.7442	37.3115	46.1948	37.635	50.2025	78.1845	80.3742
PCHAS_0310400	0.163249	1.04635	0.145155	0.213758	0.370584	0.850606	0.58165	0.777845	0.708641	0.485987	0.329954	0	0.406344	6.59828	0.834569	0.442531	2.6557	0.402804	0	0
PCHAS_0310500	10.0252	11.7076	7.88728	11.7524	6.03697	14.586	14.3065	24.9468	9.68333	21.9538	11.0861	16.8752	4.31139	8.48594	5.99274	4.33963	3.41545	4.20907	2.09917	6.49225
PCHAS_0310600	13.3307	19.3673	11.8531	15.5157	15.0186	11.3193	21.6374	24.3484	12.8592	14.5512	16.7649	9.11892	2.94946	11.9735	4.0385	4.41667	0.963823	5.11659	5.50062	9.92377
PCHAS_0310700	60.7285	59.152	66.5869	68.0147	58.6668	50.6636	56.2207	61.3667	39.6162	56.369	24.1349	43.4671	10.1906	20.6845	21.6566	31.907	19.1479	28.5165	43.2484	61.651
PCHAS_0310800	263.786	264.605	258.703	283.875	264.286	221.516	230.574	185.034	201.467	198.741	77.2709	128.787	89.8083	161.094	120.466	153.249	131.723	147.514	208.237	252.574
PCHAS_0310900	44.7473	35.3149	33.5624	29.4954	33.9749	25.1131	24.6742	27.9205	25.4365	26.7329	21.8415	26.5492	14.775	79.9731	29.0488	46.0033	46.0534	45.4411	37.6093	32.5531
PCHAS_0311000	11.6331	16.4291	16.3045	13.9415	15.0688	15.0679	17.9141	27.0099	15.406	17.6091	31.2835	21.5801	6.38012	0	8.06388	4.54313	6.41506	6.81104	9.29363	15.2426
PCHAS_0311100	18.0785	20.727	12.0561	23.7554	10.7415	26.9769	30.9591	39.5062	19.0665	40.9329	33.066	40.4967	3.16897	7.71874	10.4137	4.2277	4.55644	3.06283	4.18246	9.43206
PCHAS_0311200	164.532	178.932	182.922	191.398	193.606	172.93	167.732	174.4	156.33	175.181	80.6393	148.938	43.3559	85.6242	67.3866	67.3162	56.6713	63.5961	116.326	159.826
PCHAS_0311300	272.924	282.179	289.749	277.479	263.825	261.352	262.775	248.889	228.896	242.103	182.541	228.528	234.668	154.483	233.508	261.322	229.824	269.298	264.872	284.892
PCHAS_0311400	11.4997	12.6464	12.6646	13.1723	11.2341	9.93582	13.1377	14.2083	8.95326	17.6964	16.4981	16.4383	13.2223	8.65112	11.4396	11.9734	10.9523	12.1948	12.1453	11.8333
PCHAS_0311500	21.2078	21.5689	19.4403	21.78	17.9356	20.4728	22.7087	31.7974	12.358	39.6617	36.3348	37.7453	23.3289	16.1612	23.9297	22.4149	21.1269	20.6591	17.5217	21.2253
PCHAS_0311600	2.4389	3.75175	1.518	1.59675	0.92274	1.27078	2.60691	1.74312	2.64673	4.71934	178.446	16.6834	66.1704	128.15	117.202	15.8671	38.882	15.6463	1.39342	2.5139
PCHAS_0311700	35.2787	36.8994	35.7383	39.5292	38.515	32.0083	38.1468	42.0239	25.1424	33.4404	21.817	36.0188	6.99005	14.1882	11.3656	9.75359	9.13682	10.3937	19.3035	26.2325
PCHAS_0311800	43.9156	40.5144	45.6651	48.2401	46.3695	50.9025	45.5007	49.1384	47.0598	51.419	21.5404	42.7358	8.68998	37.134	12.2117	20.0485	15.5437	14.6216	33.8564	35.6305
PCHAS_0311900	137.396	130.974	157.883	139.417	153.898	82.7744	96.2607	70.4409	67.1145	68.0917	66.5261	47.9747	131.719	115.963	118.697	133.08	122.388	158.889	126.354	140.882
PCHAS_0312000	55.2739	100.691	101.205	91.4219	97.9585	32.211	71.2608	53.2801	37.0955	44.3848	29.3995	49.7506	13.5772	0	25.4069	29.0798	29.5784	47.555	71.1584	70.28
PCHAS_0312100	282.433	290.713	295.778	276.533	288.746	279.588	246.731	225.009	248.663	196.437	118.346	204.609	144.843	234.465	175.464	256.76	229.433	254.509	333.498	289.857
PCHAS_0312200	99.6327	102.785	123.604	108.095	137.139	74.1622	83.6758	64.4274	91.6472	57.2022	31.1652	64.909	29.5234	38.3525	43.6584	64.9483	46.3087	63.215	103.004	112.477
PCHAS_0312300	168.349	152.741	177.03	145.951	173.34	144.194	143.793	82.4122	165.176	90.3935	36.5122	63.1014	44.0086	93.2111	52.3982	121.903	80.034	88.1987	172.383	162.433
PCHAS_0312400	17.5245	26.4686	25.456	26.3545	29.9347	10.5475	16.0735	16.7414	11.2978	8.78109	9.11806	14.2429	7.77394	21.0391	7.68757	12.6994	11.855	16.6968	19.0829	16.5433
PCHAS_0312500	23.3772	26.2844	36.579	25.822	37.4537	14.0633	17.4495	16.8015	14.7397	15.1628	10.6905	10.2738	6.17642	5.27862	7.12165	12.9219	9.34805	18.2067	32.4577	32.3077
PCHAS_0312600	0.811316	2.04156	0.748111	0.826263	0.704862	0.208758	0.535313	0.501115	0.0652188	0.536726	1.88275	1.43885	2.09425	7.28716	1.63858	2.85094	2.34637	3.22522	0.729633	1.23891
PCHAS_0312700	110.487	155.698	161.296	138.002	157.128	59.2022	110.281	110.143	79.9347	90.3935	110.469	97.8241	213.574	190.03	137.537	133.821	116.001	201.563	173.481	143.365
PCHAS_0312800	11.3459	9.77581	2.81151	1.58305	3.72968	1.29219	2.8165	3.10185	1.61479	1.79956	13.4397	6.36167	15.0465	60.1423	17.9081	30.5041	45.3868	34.1908	6.24319	3.11543
PCHAS_0312900	129.093	126.885	130.222	126.116	122.104	92.2125	97.7917	89.7594	70.2034	80.0996	77.0966	74.9032	139.325	98.9976	119.814	130.643	131.723	139.178	123.371	133.379
PCHAS_0313000	262.003	270.754	275.348	296.146	300.634	182.061	203.646	166.221	152.16	163.174	82.468	122.182	129.486	126.338	125.744	147.524	119.858	147.915	228.491	272.132
PCHAS_0313100	223.716	231.147	225.745	235.077	215.136	210.723	233.823	251.918	161.476	227.636	186.754	235.552	188.435	154.84	171.958	172.764	171.381	186.847	182.559	218.638
PCHAS_0313200	403.146	420.676	434.262	414.763	473.979	342.175	393.638	324.679	317.451	289.429	125.624	260.367	58.193	207.428	120.491	158.825	115.953	192.052	406.011	430.899
PCHAS_0313300	96.6632	105.432	109.258	99.9695	109.84	64.6889	72.7732	67.5256	40.5378	53.976	90.7327	50.8064	157.957	61.8054	109.629	106.886	105.189	113.325	99.0652	108.22
PCHAS_0313400	9.98824	11.5237	10.6574	12.2939	11.9416	10.0618	9.96458	14.0396	6.93722	8.92041	10.094	7.51577	8.45302	8.07421	5.44666	8.12277	5.19957	9.11873	5.99194	11.325
PCHAS_0313500	1.2785	1.3015	0.20061	0.246186	0.398349	0.391858	0.468921	0.851054	0.244843	1.1754	24.3586	2.70086	7.4878	16.7184	12.7516	5.70824	8.31932	3.89684	0.698221	0.678286
PCHAS_0313600	6.68014	9.60135	1.79992	2.38554	2.29762	0	2.16374	3.13472	1.31807	2.41049	122.948	13.8472	34.2629	98.1824	66.9213	21.4008	39.5168	22.7262	5.20443	5.21634
PCHAS_0313700	64.5645	81.9999	95.6807	84.4104	102.535	42.9169	59.1078	59.9368	31.6813	53.6874	89.4141	51.9698	130.079	78.5298	81.5837	90.346	78.1258	107.558	85.5308	92.3665
PCHAS_0313800	2.41534	2.43277	1.45732	1.58132	0.848553	2.69681	1.53674	3.90469	3.37007	9.37319	115.246	15.9322	24.6923	59.272	59.0931	10.4058	13.191	7.13031	1.35532	2.5563
PCHAS_0313900	251.693	265.863	230.886	289.386	217.329	279.355	281.228	305.956	215.891	296.956	127.464	203.026	111.064	133.471	117.349	106.545	102.199	109.799	124.474	205.575
PCHAS_0314000	135.02	139.868	135.714	109.205	139.236	116.023	117.563	130.211	151.139	130.167	175.318	193.169	79.6109	204.547	128.668	155.842	149.505	164.078	154.976	135.103
PCHAS_0314100	19.996	13.2913	2.63403	4.52541	5.97755	2.1438	6.15697	5.29314	2.67901	4.40944	24.6983	11.8208	25.1933	209.536	35.7575	61.2312	101.201	74.0078	16.2198	3.49877
PCHAS_0314200	72.3934	82.8713	83.8467	84.6482	73.5778	68.8217	76.6191	99.5995	62.4248	85.2244	50.663	77.0532	36.1277	21.5944	36.1141	46.4658	34.7655	51.4124	53.4179	76.6389
PCHAS_0314300	50.7582	51.996	52.1842	59.0451	45.1808	46.8341	53.4879	65.1866	38.1159	59.0256	34.0062	51.9272	28.2015	45.794	30.1192	31.0201	28.0156	38.4392	32.6895	48.1733
PCHAS_0314400	60.894	56.6366	54.5861	57.8509	42.4465	47.1333	58.073	66.4263	38.0697	67.7336	44.649	54.8985	44.483	33.4409	51.3203	55.3972	50.0689	55.7318	42.543	56.2853
PCHAS_0314500	129.835	121.164	116.638	124.307	107.561	101.857	110.661	104.429	74.3425	111.476	63.3362	80.1072	92.0554	91.6718	90.6296	106.402	103.912	109.241	107.632	117.845
PCHAS_0314600	5.07938	10.6288	3.12163	5.08602	2.8261	19.2009	29.0095	40.7522	32.587	48.9215	133.689	89.4195	14.3165	39.2488	40.3508	17.7176	19.9285	11.4271	3.52083	3.75346
PCHAS_0314700	1.58619	4.35721	1.41038	1.18684	1.20025	9.05197	7.26628	9.98718	12.2955	11.8051	78.3174	24.026	4.51223	54.9528	20.0795	7.06398	4.42352	8.10718	4.20756	1.75176
PCHAS_0314800	34.4921	43.7726	6.72567	5.65964	9.64837	2.55242	6.93012	5.56062	3.84633	4.6966	35.032	24.9842	44.6486	228.859	66.7322	111.193	156.38	96.2514	19.6941	10.3584
PCHAS_0314900	19.4831	21.4971	24.7549	22.9529	22.8735	9.89713	10.8284	10.9899	6.83183	8.07806	5.64903	7.23918	3.64729	0	6.38121	8.67978	7.23944	14.0603	15.8133	17.1314
PCHAS_0315000	50.6071	61.4596	61.3393	54.0583	60.4637	28.6818	45.5524	39.6599	28.327	37.664	30.1474	28.2411	54.3645	21.5312	44.481	42.2384	31.1974	61.4488	49.8378	51.477
PCHAS_0315100	13.0885	13.7213	16.5198	12.1274	14.3942	6.26108	8.29926	6.54029	5.77785	4.62287	5.94099	5.12158	9.52514	6.72482	9.45082	13.4554	15.1571	17.4475	11.1693	14.4343
PCHAS_0315200	19.091	33.3321	36.1008	29.5223	42.8149	15.3036	25.0846	29.6356	11.9995	16.0728	26.8009	20.6822	14.6214	31.4239	13.3958	15.8065	14.615	25.1515	26.6514	24.0412
PCHAS_0315300	0.268371	0.442323	0.374983	0.351405	0.348124	0.0665878	0.204899	0.41102	0.249635	0.3424	0.464936	0.393388	0.477146	0	0.326662	0.623566	0.374212	0.898679	0.164281	0.395177
PCHAS_0315400	97.9221	100.611	92.4872	102.768	81.49	165.694	155.542	199.497	163.049	181.413	222.445	233.223	40.7975	131.646	89.5212	68.4974	63.9242	58.0706	65.4306	87.5858
PCHAS_0315500	1.70466	2.18523	1.55361	1.06024	1.06416	0.444106	1.74617	1.11682	0.924963	1.83959	73.9904	6.85074	20.685	53.3974	35.2217	6.29605	11.3697	6.99267	1.70438	2.63562
PCHAS_0315600	0.490311	0.89791	0.124562	0.275149	0.106003	1.70317	2.37088	1.83561	1.6723	3.02354	15.8561	5.51015	0.697393	2.83109	3.1034	2.08862	1.82315	1.38263	0.200093	0.360992
PCHAS_0315700	0.792111	5.0771	0.704316	0.691461	0.499483	0.687881	0.705566	1.25808	0.859613	1.17905	7.3379	2.2577	1.64304	5.336	2.69965	4.83128	7.30201	2.93171	0.754265	0.680392
PCHAS_0315800	1.67335	3.21763	0.991918	1.00425	1.10792	1.81645	1.11789	2.65771	0.756643	1.55672	4.22766	2.86166	2.25612	5.63619	2.25746	4.63057	4.76379	3.44071	1.19505	1.3475
PCHAS_0315900	240.812	274.243	223.465	284.034	220.555	325.839	367.914	464.607	299.627	443.735	345.76	460.818	67.1822	210.135	118.943	70.7663	60.8227	59.0911	109.334	188.985
PCHAS_0316000	5.3661	6.65518	7.09882	5.027	6.86645	0.757724	2.72022	1.2992	0.852202	0.584441	1.1904	1.49216	1.52029	5.29	1.63556	2.77917	2.69691	4.4673	4.36195	5.28379
PCHAS_0316100	32.5026	53.7266	66.5463	42.5589	62.1329	21.5407	41.9034	35.1509	17.6362	28.0093	84.2778	46.8076	124.547	69.1425	58.3023	43.474	48.7002	85.4738	44.592	43.5307
PCHAS_0316200	161.01	169.014	194.675	174.73	178.67	129.762	132.387	135.161	115.331	93.9617	92.0573	95.6553	114.364	80.7421	121.188	135.921	139.089	158.222	150.655	171.419
PCHAS_0316300	38.2451	46.3527	16.0756	38.8485	13.4174	137.48	119.749	191.341	129.04	194.933	265.631	198.988	52.5021	145.212	112.966	46.0249	57.3144	32.1705	15.0637	16.7241
PCHAS_0316400	11.0453	14.4798	13.1566	11.2973	11.9848	7.96312	11.2122	13.8026	8.2323	14.0833	19.4603	13.9708	6.22484	10.108	10.512	9.2649	10.7132	7.97037	11.6686	10.2035
PCHAS_0316500	156.081	156.754	141.957	152.559	142.848	129.338	121.894	147.952	101.39	114.526	71.091	83.6474	127.221	177.706	95.9943	153.448	134.107	146.792	160.136	171.006
PCHAS_0316600	2366.16	2347	2437.89	2332.53	2339.32	2090.95	2032.51	1672.52	2575.12	1699.9	1141.62	1565.51	1911.89	1568.19	2221.13	2252.88	2100.24	2194.92	2724.29	2507.47
PCHAS_0316700	30.9764	44.5747	42.7844	35.751	50.3994	16.7995	33.154	32.6695	15.9444	26.061	86.8605	32.6639	167.312	14.8461	50.4914	45.4701	52.1844	77.9425	38.6485	39.4381
PCHAS_0316800	154.665	151.464	101.143	173.69	98.1522	352.115	297.105	410.216	371.927	395.164	307.785	404.75	47.951	155.727	131	50.2319	62.6776	33.4996	34.5914	85.5732
PCHAS_0316900	29.1111	23.2311	8.05678	6.31095	10.0658	5.02262	8.58626	9.41563	5.43966	5.73927	22.2106	17.1442	29.2722	140.261	35.8096	62.1904	77.779	70.4024	16.7974	7.45192
PCHAS_0317000	1.64626	2.69657	2.11436	1.43707	1.86855	0.476544	1.14052	1.1984	0.79402	0.952944	2.86524	2.50251	6.82951	3.69663	4.51974	2.6032	4.16592	4.06201	1.1757	0.942712
PCHAS_0317100	37.87	47.8901	60.9748	47.5768	65.1853	11.2586	21.8805	12.5985	10.7371	11.6801	19.9975	9.91867	38.2146	27.5793	30.8134	38.3809	23.8655	53.6657	59.4514	49.4527
PCHAS_0317200	72.0549	69.6623	77.0322	75.8892	76.9521	55.6674	55.3814	57.4124	43.4127	45.5555	97.5369	49.4544	157.158	102.273	101.844	79.3711	94.0875	94.6924	76.9306	83.834
PCHAS_0317300	616.811	599.13	590.267	624.45	553.231	738.326	633.211	658.858	628.023	600.851	410.347	525.381	420.876	385.029	463.66	453.516	457.155	456.14	485.577	606.016
PCHAS_0317400	47.5085	59.6498	57.8124	57.4576	61.3139	25.0814	36.5387	39.5146	13.3246	36.6039	41.9836	33.1666	71.7163	32.4267	43.2729	44.3939	46.1899	61.8393	51.7653	54.9199
PCHAS_0317500	106.654	108.177	114.182	101.551	111.147	75.8102	90.8319	124.484	61.7847	105.459	163.785	119.432	172.574	97.1596	148.762	122.609	132.957	144.068	110.233	122.421
PCHAS_0317520	141.366	192.235	164.285	144.595	155.415	89.5544	148.502	124.376	82.0687	98.4948	167.18	119.041	277.008	104.203	151.569	159.574	159.372	218.403	142.999	162.765
PCHAS_0317530	1.50567	3.86027	4.01635	1.97152	4.55727	10.4603	0	3.58709	3.26795	2.24116	13.6945	0	7.49553	0	2.56578	6.12229	19.5951	7.43023	0	1.93996
PCHAS_0317540	24.4395	19.9369	29.6328	40.7287	28.5802	19.2942	23.7483	23.8191	28.9333	13.2283	17.9624	22.7973	55.3024	0	22.7165	21.0796	28.9147	41.1154	22.214	28.6263
PCHAS_0317600	44.9109	38.7434	10.4228	10.5408	16.4574	5.88698	8.30271	7.40219	5.82404	5.88609	41.8183	23.6691	46.051	308.247	76.0505	131.314	184.718	125.45	28.2411	13.1015
PCHAS_0317700	3686.94	3405.56	3496.11	3567.53	3551.58	3791.74	3229.1	2744	4211.13	2815.99	2046.06	2411.53	2682.45	2787.38	3469.43	3694.22	3710.56	3427.34	3876.86	4056.81
PCHAS_0317800	3.73714	4.19186	7.89195	6.11677	12.3718	9.73617	4.99324	15.5808	2.0278	6.25801	35.8787	6.39104	16.2788	18.8812	3.98025	6.3316	10.6391	10.9501	4.00341	5.41697
PCHAS_0317900	945.509	1127.73	1081.45	955.32	1136.05	919.977	903.06	930.368	1039.81	978.008	2311.66	1188.56	4255.57	1704.55	2546.92	1892	2316.12	2295.51	1608.31	1155.2
PCHAS_0318000	63.2034	78.3369	91.7451	71.7905	92.6251	35.0482	53.9238	37.8706	31.8155	31.7369	19.4311	24.0916	13.7418	7.69454	21.0866	30.9633	34.6856	41.336	56.2862	75.7923
PCHAS_0318100	46.8855	56.0012	30.679	54.4694	22.0551	92.9099	120.455	171.361	75.34	175.921	190.02	201.998	27.0114	67.4793	59.7448	24.7027	22.8591	19.0522	8.64424	27.3365
PCHAS_0318200	145.19	284.551	335.364	226.977	327.301	69.5085	169.949	190.411	74.2363	118.1	460.169	187.813	658.501	159.875	219.264	182.913	146.863	358.532	226.988	235.934
PCHAS_0318300	285.132	272.909	268.578	241.812	239.548	139.715	162.792	126.928	84.746	165.036	565.027	154.309	1153.88	519.425	769.882	605.268	734.378	633.915	418.784	321.823
PCHAS_0318400	5.38373	11.0424	2.87221	5.63957	2.60723	40.7688	41.8169	71.57	54.686	94.2401	363.224	181.929	19.833	60.9288	105.321	21.0155	13.3124	13.0183	3.3835	8.04648
PCHAS_0318500	1.48118	1.89875	0.878009	3.01694	0.747194	6.57433	5.5706	8.23377	6.78682	7.83901	8.31593	7.31765	0.819295	0	1.40226	0.669193	0	0.203039	0	0.424093
PCHAS_0318600	0.79644	1.27621	0.531124	0.260715	0	0	0.354711	0.711537	0.432155	0.889117	31.9937	1.36202	29.7364	8.04773	14.2506	2.15897	5.18253	4.66724	0.56879	0.769624
PCHAS_0318700	0.177245	0.823647	0.1576	0.174063	0.150884	0.346325	1.22357	2.13773	0.432786	3.7925	18.6286	5.22871	2.37135	1.791	3.51122	0.750737	0.648761	0.628674	0.0949367	0.342554
PCHAS_0318800	1.51191	6.13746	4.70518	1.64975	7.24561	6.56484	6.28471	3.90214	6.0161	3.75077	8.40357	6.89489	3.76332	0	1.71762	3.07385	3.2794	4.66316	6.83846	4.54536
PCHAS_0318900	40.425	40.2666	39.2636	39.6994	41.1987	17.2366	19.6261	13.34	17.1923	15.1785	79.4057	19.3073	204.644	40.48	107.986	69.4767	88.2758	86.0418	50.8479	47.9794
PCHAS_0319000	2.41077	2.06027	3.26639	2.85603	2.0848	1.19632	1.43158	0.957235	0.249163	0.683505	3.01637	0	5.71493	0	5.08629	1.86716	4.48205	3.11583	1.47574	3.25405
PCHAS_0319100	0.330946	0.848488	0.588529	0.650011	0	0.862194	1.17915	1.774	2.15489	1.97043	0.501675	3.39578	0	0	0.563959	0	0	0.204146	0.23635	1.27921
PCHAS_0319200	22.5021	17.377	16.1511	14.1996	14.5653	11.7718	13.5234	9.68834	10.0032	11.2992	31.2337	13.9091	83.6778	131.494	39.2694	24.9872	37.929	33.1126	18.2	16.0682
PCHAS_0319300	5.07245	10.4762	9.02047	4.61241	4.05149	3.42611	3.26318	1.51057	2.44654	2.51676	87.4295	12.0481	274.613	119.596	101.566	47.1711	77.4749	44.3271	9.25769	10.1664
PCHAS_0319400	0.755957	0.484536	0.672169	0.494925	0.476685	0.218828	0.448908	0.900493	0.820377	0.562615	1.27327	1.29279	0.31361	0	0.858809	0.512308	0.81985	0.466316	0.719838	0.487003
PCHAS_0319500	0.941528	1.81044	2.09293	1.84926	2.13732	0.817637	0	1.12154	2.04352	1.40145	9.03922	11.271	2.34356	0	4.81333	2.55227	1.53166	1.74236	2.01722	4.85241
PCHAS_0319600	0.778571	1.49709	0.519207	0.509731	0.147283	0.338061	2.42727	1.15929	2.53476	3.18695	51.7331	39.944	5.81384	23.6015	16.9161	1.31908	2.53313	2.64146	0.556029	2.50786
PCHAS_0319700	1.37573	1.51163	0.873747	1.2867	0.297427	2.3894	4.90167	8.89613	4.26561	4.0955	44.8866	38.3152	0.978381	7.94356	10.717	1.86465	2.55772	1.93971	0.280714	2.02576
PCHAS_0319800	1.79788	1.53649	1.42099	4.7083	0.906956	4.51045	3.91466	6.18694	1.30073	5.0549	14.1316	14.3483	0.994473	0	2.38291	1.3538	1.94984	1.72517	1.42665	2.83124
PCHAS_0319900	2.57157	2.53579	2.11065	4.40328	0.898093	5.84064	3.8764	11.5461	6.01075	12.0721	52.5756	53.4495	10.3399	7.99531	12.1352	1.87679	1.93079	3.17257	0	4.33279
PCHAS_0320000	0.71206	0.652	0.180896	0.532784	0.230917	0.530026	1.81217	2.30227	1.10391	2.27119	9.86879	10.7855	0.759597	12.3345	3.1202	0.68937	0	0.37649	0.290588	0.655319
PCHAS_0320100	1.0264	0.657877	0.304212	0.447989	0	5.34803	2.43801	6.31698	4.45546	5.34722	12.9658	28.6696	1.27741	0	3.78965	1.85489	1.66972	0.844186	0.244339	1.10204
PCHAS_0320200	0.989064	1.52147	0.351776	1.81311	0.449047	7.21491	4.5812	9.18972	5.15208	9.42213	35.9833	33.1522	1.47713	7.99531	8.09015	1.34057	2.57438	1.46426	1.41271	1.27435
PCHAS_0320300	2.17594	2.78937	0.703551	1.5541	0.449047	5.49707	6.3432	6.36211	3.86406	7.94992	8.39611	10.8252	0.492377	0	3.03381	0.80434	0.643595	1.46426	0.847627	1.27435
PCHAS_0320400	0.571115	0.97616	0.338543	0.747818	0.288103	1.65322	2.37401	3.40155	1.23957	5.10058	7.69549	13.0225	0.473855	0	2.59527	0.774082	0	0.704591	0	0.490565
PCHAS_0320500	227.46	248.056	288.761	173.001	386.56	49.5242	95.3905	16.8533	61.4156	18.1435	49.4932	43.1796	157.661	175.954	225.148	479.999	366.132	504.579	661.902	338.782
PCHAS_0400101	0.388042	0.248718	0.172516	0.508102	0.587251	5.72868	3.1108	8.32021	3.78999	7.21993	40.5876	33.8439	1.93176	7.84204	9.25758	1.05189	0.631258	1.67556	0.554253	0.249984
PCHAS_0400111	0.593438	1.01432	0.703551	0.518032	0	5.49707	2.4668	10.1323	8.58679	9.12769	41.5807	37.2117	1.96951	23.9859	8.76433	0.80434	0	1.70831	0.565085	0.25487
PCHAS_0400121	2.35512	4.09731	1.94451	2.86353	0.381876	9.93395	8.09154	18.0348	13.5093	12.7703	44.2011	56.9617	3.76853	27.1973	15.7666	3.64812	2.18929	2.90554	1.44167	2.16745
PCHAS_0400200	0.105983	0.135862	0.28271	0.693874	0.240589	1.10445	0.944039	3.53492	0.69009	1.10428	13.4953	12.3248	1.05522	4.2837	4.15391	1.43649	1.03447	1.04602	0.302759	0.40966
PCHAS_0400300	5.95755	13.796	10.2527	13.5885	5.81676	18.358	21.5689	67.0744	25.4438	42.3362	193.631	212.31	19.6125	54.3731	46.8309	9.89813	5.62739	7.82408	3.29394	6.6855
PCHAS_0400400	3.9822	6.89153	4.42603	7.0393	4.36925	10.7204	9.5772	41.5063	13.829	24.8953	113.286	109.643	15.8594	24.1432	25.4475	5.6673	5.18253	6.14111	1.42198	2.05233
PCHAS_0400500	3.34285	6.66595	2.80721	3.89079	0.843164	12.9022	11.2488	40.9261	37.4865	46.1643	409.519	356.979	35.132	157.632	157.603	29.1989	12.0846	16.7256	4.50945	7.41773
PCHAS_0400550	0	3.19052	0.885206	0.651787	0.376659	0	0	2.37179	0	1.48186	4.52741	3.40506	1.23902	0	4.24125	1.34936	1.61954	1.22822	0	1.92406
PCHAS_0400600	1.66555	1.97086	2.50622	1.67759	2.61754	3.33782	2.05418	6.40984	4.17112	4.76759	5.95589	4.82024	2.55122	0	2.18326	0.868257	1.25053	1.2645	0.914984	2.14596
PCHAS_0400700	7.9906	14.3406	19.4878	11.6586	14.8568	7.53394	11.7948	4.89516	4.95516	2.03895	28.84	7.8086	86.3771	18.4553	29.9566	20.1135	20.0555	32.6725	12.0654	12.3545
PCHAS_0400800	0.405307	0.606164	0.480512	0.707613	0.255575	0.586625	0.481365	0.402334	0.146615	0.100549	0.204799	0	0.840711	0	0.230226	0.183116	0.439564	0.500032	0.482428	0.261107
PCHAS_0400900	124.875	139.184	93.2685	95.0085	76.3885	518.244	536.251	689.575	713.813	834.281	1200.86	1227.37	600.713	340.026	609.719	283.634	309.634	273.09	134.054	116.521
PCHAS_0401000	312.384	377.449	245.853	305.421	219.318	803.848	876.149	1110.85	1026.5	1194.98	1282.29	1603.45	287.433	334.713	497.049	263.145	245.483	271.307	261.536	251.333
PCHAS_0401100	4.44827	9.17327	1.20377	5.82456	0.731727	42.3244	49.9589	80.1725	60.8664	93.8481	182.942	153.466	16.3676	62.5365	52.4024	13.8932	10.068	7.87391	1.93371	5.98052
PCHAS_0401200	46.871	43.6267	41.3136	32.5543	38.3965	32.5628	30.8587	30.101	32.7307	25.7834	182.055	46.6996	438.769	57.6574	214.613	129.819	202.888	146.323	56.1776	54.3515
PCHAS_0401300	9.77832	21.1115	20.3635	12.4668	16.9401	1.78771	6.87628	2.14567	4.46804	1.91512	64.2321	7.92109	206.244	0	58.3208	43.9456	38.5121	79.6834	31.6088	16.5774
PCHAS_0401400	1.06541	0.341442	0.473663	0.348763	0.201546	0	0	0.634558	0	0	0.269173	0.911003	0	0	1.36166	1.08304	2.59979	0.328603	0.380441	1.7159
PCHAS_0401500	87.4407	73.5685	106.511	68.5877	87.4833	23.5597	38.6647	14.1696	29.4415	13.6677	107.347	25.6959	244.661	134.959	181.012	173.673	205.053	186.145	118.337	108.898
PCHAS_0401600	76.9673	69.294	62.3049	56.5073	51.5071	51.7717	61.0285	58.8256	61.7997	58.6068	75.3094	70.7579	106.864	53.9464	89.0818	80.2002	80.3363	79.5869	66.088	66.2074
PCHAS_0401700	22.924	33.2533	31.29	16.0616	17.3463	8.03287	12.5382	6.22791	12.2205	7.78222	471.26	59.8366	982.539	195.064	440.674	171.708	258.429	187.056	74.1028	33.1635
PCHAS_0401800	5.8612	9.60066	10.1336	10.6592	12.9357	3.11053	3.77059	4.46062	1.41348	1.69639	3.61977	3.89802	3.24203	0	2.77444	3.53076	0.529715	5.02155	6.7439	5.87363
PCHAS_0401900	94.1832	99.9835	99.4462	100.971	83.8873	87.2428	99.6228	114.411	76.6569	111.568	109.358	114.76	85.47	103.099	99.9756	100.528	79.4804	97.6763	85.3392	97.0796
PCHAS_0402000	63.228	66.1596	69.3902	68.4267	59.8923	34.3277	49.3932	47.0869	18.6861	56.496	65.2073	43.2199	108.301	44.9005	73.4344	68.1322	72.1362	84.0011	57.9813	64.4091
PCHAS_0402100	16.0752	18.1317	17.5556	21.997	18.4832	14.6726	22.7038	24.8416	12.573	25.2211	18.9774	20.3086	2.88381	1.95116	7.15686	3.7295	4.08361	4.94315	7.72253	14.8031
PCHAS_0402200	143.072	127.989	155.586	138.37	137.338	147.188	146.694	175.332	153.403	160.87	113.728	168.983	35.0144	110.941	67.8217	78.1255	65.8613	76.6146	105.853	133.061
PCHAS_0402300	46.2941	53.5106	40.8161	51.4228	47.1332	44.0421	53.9776	60.7219	31.8934	61.7463	66.6282	58.7099	35.6051	52.5602	38.5581	47.4124	44.0015	50.5359	48.2924	47.9188
PCHAS_0402400	85.5654	105.755	97.646	102.602	106.829	93.7181	113.913	137.95	73.9896	155.126	138.886	141.915	28.244	53.146	43.8179	43.6306	30.7388	42.7779	66.5683	79.5
PCHAS_0402500	47.4417	53.903	52.4687	50.4535	56.5978	32.8507	41.3533	37.2405	29.5167	42.1138	25.2753	30.2073	23.9288	22.1131	30.1003	39.9371	28.9891	39.4374	45.8821	50.6529
PCHAS_0402600	46.1741	44.5276	50.4005	51.0839	52.1803	21.5634	33.9637	33.9542	14.9368	30.9387	24.3888	23.8563	30.6718	22.5534	34.1521	42.4789	39.3352	47.4426	48.4179	47.6301
PCHAS_0402700	83.5954	86.9106	86.3294	96.277	81.369	92.4535	104.18	125.095	75.086	123.235	108.131	106.968	26.6596	62.7709	49.9181	40.1392	39.3774	36.2054	48.5716	77.8311
PCHAS_0402800	290.147	312.922	335.279	307.677	293.735	252.313	272.942	303.07	273.952	232.187	200.561	247.078	277.62	224.6	232.676	239.939	227.286	292.83	259.655	318.095
PCHAS_0402900	0.595378	1.78085	0.529388	0.649657	0.600685	1.89579	3.71229	4.60988	3.44594	4.57876	16.3457	10.8606	2.46993	8.02143	3.38191	2.5554	3.87419	2.81568	0.708664	1.53422
PCHAS_0403000	8.24626	11.9833	6.8573	11.7157	6.36614	16.9317	19.3892	34.8773	11.2315	36.9724	35.1562	36.3119	5.31843	9.4458	9.8992	5.20381	4.56213	3.74813	2.19355	5.11884
PCHAS_0403100	21.7381	37.5974	42.6458	41.5662	59.7904	24.5709	31.3496	24.2502	14.9781	17.4624	13.2507	22.4231	6.8709	13.9464	4.11594	11.2242	8.98108	12.7707	21.1923	35.1214
PCHAS_0403200	239.135	265.897	226.07	292.98	213.423	303.768	307.251	410.407	230.223	369.207	184.797	314.332	46.6916	109.092	77.4999	50.8498	46.1029	48.9487	104.089	182.92
PCHAS_0403300	97.735	105.285	82.7775	111.408	79.6987	135.872	129.035	135.134	104.576	158.189	57.8555	116.115	13.9088	59.6594	27.4886	23.8644	18.8665	16.5191	35.6901	73.0831
PCHAS_0403400	87.1596	56.874	5.31582	12.3603	21.1905	8.74405	16.2561	18.7408	8.19527	10.7723	67.0953	39.8198	87.7197	623.178	143.701	245.653	415.643	233.693	57.078	10.1354
PCHAS_0403500	0.0761964	0.0976773	0	0.0997716	0	0.13234	0	0	0.165379	0	0.847035	0	0	3.07975	0.389535	0.206551	0.495819	0.376017	0.108834	0.0981745
PCHAS_0403600	196.108	185.852	30.0935	22.1582	51.3105	10.4224	35.9197	33.1676	25.2674	27.5111	317.652	114.527	270.056	1508.63	409.651	557.306	857.108	596.411	118.454	44.3801
PCHAS_0403700	117.79	138.218	152.518	131.43	137.077	105.475	121.455	141.267	95.4981	130.133	199.052	163.424	229.021	129.675	155.62	163.845	159.185	200.309	167.753	138.331
PCHAS_0403800	25.2746	29.5354	32.584	32.2493	31.8624	21.302	25.8304	27.8593	16.0583	24.4646	18.7176	23.9468	6.30348	12.042	9.90018	12.5182	11.309	14.8863	18.2985	23.288
PCHAS_0403900	2660.38	2630.39	2715.97	2507.11	2672.75	2286.98	2104.44	2018.55	2601.93	2072.97	1613.36	1917.31	2399.66	1982.53	2895.63	3136.51	2920.06	2841.97	3149.35	2940.96
PCHAS_0404000	98.8186	99.4991	115.983	96.4567	124.262	68.6524	76.1789	56.5019	89.6913	59.3709	43.5774	57.7651	22.3609	43.5721	28.1679	42.86	50.2728	46.5489	97.5189	100.469
PCHAS_0404100	2.02804	1.58875	1.10199	1.0327	1.10831	0.58706	0.802871	1.07369	0.733621	1.00624	1.13862	2.69752	1.68267	0	1.53598	2.13794	3.29917	1.80701	1.77021	1.74201
PCHAS_0404200	5.24145	5.38686	8.75853	5.38403	9.23151	1.33413	2.41488	0.91501	1.27492	0.605314	1.50689	0	4.27387	0	3.46495	6.00183	6.17449	8.58475	8.51916	5.23963
PCHAS_0404300	38.2625	48.5992	52.7491	47.8027	48.0774	33.5326	37.5214	56.0318	25.1424	36.5754	68.4665	38.4201	83.0069	28.3764	50.2478	47.5785	53.6788	54.5671	41.114	40.2533
PCHAS_0404400	25.184	42.0915	39.6832	37.5675	37.0273	22.147	30.9511	34.9357	19.7192	31.3174	43.1695	34.8907	10.7121	25.7696	25.5321	27.2209	19.1879	26.9403	37.1095	41.4843
PCHAS_0404500	13.3224	13.1353	9.73101	13.3935	8.22705	12.8893	17.7763	20.1937	8.49994	29.0931	17.7645	19.8167	3.38285	13.7328	6.82596	5.76854	5.87631	4.03729	3.98455	8.27149
PCHAS_0404600	52.8017	51.5633	33.2024	25.1335	31.4777	11.7195	18.5563	15.061	10.3796	11.7014	74.3476	26.4397	101.752	201.237	104.491	113.122	173.499	125.435	48.9377	36.2105
PCHAS_0404700	128.273	188.181	216.534	164.528	260.507	62.3745	104.918	84.2054	54.8091	63.6006	136.342	77.704	385.403	123.611	141.754	183.334	166.312	293.865	226.773	186.437
PCHAS_0404800	226.692	281.002	320.287	294.108	299.006	223.954	257.129	306.205	242.85	217.935	232.455	268.883	127.347	168.12	146.724	142.634	138.038	170.883	193.087	270.106
PCHAS_0404900	62.4852	69.4465	73.9338	66.6071	74.5673	29.3624	44.5871	38.5436	16.44	40.9372	29.3209	29.6542	70.2435	42.7544	54.1091	75.987	62.9933	84.3362	76.9468	73.4993
PCHAS_0405000	17.5587	22.6521	13.2259	17.8659	10.5784	47.2016	56.9824	78.7343	55.1017	82.7359	162.64	121.642	20.0433	58.7648	49.1704	21.0703	23.288	13.9357	6.38973	13.257
PCHAS_0405100	1336.46	1208.88	1282.83	1286.49	1440.94	1241.59	1073.37	806.586	1272.88	875.526	398.038	580.101	617.596	1157.15	868.547	1218.2	1089.53	1090.11	1524.77	1371.53
PCHAS_0405200	2.54394	4.93349	1.50799	1.62282	1.5301	0.566461	1.04584	1.32092	0.424728	1.06802	3.75744	2.45413	3.73435	36.9107	7.8921	9.72522	10.6114	7.88647	3.91311	2.68941
PCHAS_0405300	512.425	492.095	497.014	551.402	450.133	758.343	621.482	676.402	739.852	672.343	546.072	592.804	159.987	465.829	358.048	285.384	305.75	254.296	356.459	455.192
PCHAS_0405400	154.668	159.833	173.13	155.06	160.833	147.995	166.675	172.259	126.453	174.29	152.278	138.905	152.577	84.3755	137.443	136.842	120.403	143.756	134.99	148.91
PCHAS_0405500	92.9095	112.226	114.303	113.953	127.122	66.1098	81.0631	79.5529	57.83	69.791	38.4665	45.5657	20.2408	41.9583	33.9058	45.7282	33.2121	54.0032	91.4359	95.1871
PCHAS_0405600	1146.11	1113.95	1129.04	1156.62	1189.33	1243.65	1114.32	1065.36	1340.84	990.22	547.322	889.371	273.462	647.111	519.314	603.862	587.363	583.025	905.256	1116.06
PCHAS_0405700	331.15	350.382	310.551	343.31	310.674	416.517	451.382	500.147	399.206	554.471	508.004	589.667	148.749	238.801	263.915	238.268	197.899	225.959	273.364	305.368
PCHAS_0405800	298.516	360.935	328.719	331.239	334.498	309.234	377.249	384.715	340.217	355.704	351.292	337.189	99.1373	262.988	181.773	174.777	130.867	179.52	223.892	291.641
PCHAS_0405900	487.947	543.131	528.046	510.394	532.193	545.772	582.448	657.786	613.057	529.748	490.972	623.126	151.16	313.955	234.65	240.233	202.179	260.483	383.272	435.807
PCHAS_0406000	272.755	267.773	269.057	283.111	248.777	327.337	289.12	271.273	360.197	247.024	157.661	263.217	117.279	84.64	148.985	204.358	224.837	198.929	194.418	262.391
PCHAS_0406100	462.856	467.093	492.854	505.996	488.18	352.571	354.342	245.061	322.36	251.545	95.5051	152.475	112.379	179.266	188.175	260.034	217.564	248.616	402.515	470.496
PCHAS_0406200	3993.94	3685.55	3935.16	3904.01	3866.93	3841.9	3335.27	2725.62	3974.98	2789.2	1968.51	2400.03	3445.62	3328.79	3875.07	4289.18	4143.85	3874.36	4495.06	4225.77
PCHAS_0406210	2.60265	5.00457	10.4138	5.11187	8.86225	2.26018	2.31829	3.10027	0	0	5.26042	0	16.1957	0	4.43514	5.29141	8.46788	6.42184	1.85873	0
PCHAS_0406300	2745.1	2595.14	2746.7	2680.81	2755.86	2384.62	2321.1	1871.22	2839.85	1815.46	1299.53	1469.94	2332.94	2094.1	2641.44	2766.33	2594.84	2610.73	3234.88	2848.01
PCHAS_0406400	2104.78	2382.84	2502.51	2271.5	2486.77	1576.4	1906.27	1721.85	1518.34	1625.68	1392.99	1475.7	2269.74	1503.18	2188.46	2233.56	1973.54	2509.87	2627.43	2403.76
PCHAS_0406500	6.08669	8.68927	4.42805	3.80382	5.02441	1.9221	2.46439	2.80131	2.7022	2.05908	37.0466	4.7314	13.4288	5.59125	20.273	16.1247	21.1536	17.7491	5.9276	7.1294
PCHAS_0406600	50.4231	55.6737	69.2151	61.6867	72.1314	23.3324	31.1447	31.3472	14.379	21.9136	21.573	18.8826	32.9803	37.1903	28.5372	30.1806	28.1407	48.8125	47.5759	55.0087
PCHAS_0406700	20.6284	25.2082	12.6851	24.4865	14.734	60.9412	73.4984	102.653	77.829	102.446	226.977	153.638	25.9131	85.7148	66.3628	29.7887	30.108	25.9252	9.9132	16.1458
PCHAS_0406800	14.0658	17.7449	9.42972	18.8563	9.62974	39.7471	31.6208	57.1802	38.04	52.6742	53.5873	53.4544	9.16962	18.0482	16.1698	9.68362	9.44334	6.05983	3.82679	8.19848
PCHAS_0406900	18.4053	25.5797	8.83081	15.6292	7.65299	59.1072	65.0095	99.528	58.6359	115.891	166.988	152.081	25.7414	71.8138	63.6601	29.454	31.2755	19.5594	7.67846	11.4462
PCHAS_0407000	44.6761	58.0147	66.8091	59.2586	65.1237	27.5445	37.5553	36.5154	22.6675	32.0983	25.4086	26.4597	18.5339	42.9939	25.0477	35.7816	28.9454	48.5558	50.6907	55.8182
PCHAS_0407100	0.433404	0.64448	0.400781	0.340499	0.734609	0.15055	0.308841	0.309761	0.0752539	0.387069	0.735828	0.533651	0.388364	1.4014	0.856725	1.22186	1.12808	0.812737	0.495236	0.513742
PCHAS_0407200	111.378	118.227	107.435	136.434	109.828	107.445	131.081	151.883	80.6704	130.527	59.7163	106.44	16.6213	30.5547	27.9113	28.3477	18.4466	21.7614	49.8488	86.5242
PCHAS_0407300	0.853528	1.4771	0.379463	0.614686	0.452097	0.815338	1.59657	2.49096	1.66727	3.36673	37.1334	7.1523	6.79848	8.62459	11.5631	4.39608	5.13746	3.26432	0.975297	1.09972
PCHAS_0407400	259.896	280.112	324.185	312.623	339.878	172.081	204.754	173.079	149.87	159.026	74.2141	120.009	93.7751	109.092	109.619	150.446	110.135	170.932	249.781	268.207
PCHAS_0407500	6.16417	6.73129	5.88695	6.87561	3.97333	3.56871	8.54107	4.89516	10.4058	4.41773	130.357	14.0555	43.1885	55.366	57.1899	9.90205	14.8559	11.8297	3.58701	5.58894
PCHAS_0407550	3.06194	0	1.36128	4.00931	3.47539	2.65904	2.7274	1.82369	0	0	0	0	3.81075	0	0	6.22518	9.96221	1.88878	2.18674	3.94513
PCHAS_0407600	202.428	204.836	212.161	207.536	222.266	145.87	125.834	64.1308	163.591	86.547	30.4681	55.9782	34.3058	17.4082	71.1928	106.829	92.486	111.585	215.929	209.209
PCHAS_0407700	129.959	153.829	153.461	154.424	144.474	139.649	153.193	193.002	115.2	156.742	185.219	182.784	135.439	88.3641	127.288	121.161	111.437	130.813	132.54	135.051
PCHAS_0407800	0.793837	1.18724	0.352925	0.519725	0.600685	0	0.471402	0.788013	0.287162	0.787743	47.466	1.35757	14.1609	0	20.5169	4.30383	7.74838	3.59101	0.566931	0.852343
PCHAS_0407900	307.543	287.112	316.059	281.596	329.677	298.04	285.851	284.713	351.889	243.814	171.165	245.82	70.7262	180.151	100.638	138.191	126.889	136.096	245.102	284.984
PCHAS_0408000	63.5999	69.1989	71.9116	64.9804	59.7852	52.8622	63.5992	74.6198	45.4938	74.1526	64.3216	71.364	60.8689	44.4877	56.7586	57.3386	54.9622	69.8441	55.503	61.5356
PCHAS_0408100	83.034	90.9466	87.778	84.4172	85.1536	60.9856	73.8337	70.6254	49.3496	71.1153	45.2288	56.1109	61.6102	34.8989	57.3835	70.9979	60.8671	81.668	85.0961	89.1846
PCHAS_0408200	9.94987	7.477	3.05071	2.24627	1.81733	2.38362	3.05613	2.45219	3.72337	0.510698	11.7889	4.69398	14.5182	97.073	21.6328	29.7621	32.3725	29.2067	7.84095	1.76825
PCHAS_0408300	4.64347	8.7994	2.44138	4.07107	2.6276	10.3091	17.6955	27.7526	11.3053	31.3132	65.8193	43.2266	6.03031	19.5842	18.3028	10.5078	12.6117	7.37259	2.19158	2.49718
PCHAS_0408400	18.5127	20.5157	27.3065	16.7645	22.8453	8.11347	8.93851	9.4804	4.13071	6.43829	27.1888	9.4682	99.266	24.4757	55.8709	52.6461	44.189	57.6319	36.2037	24.9671
PCHAS_0408450	2.16888	0	0	2.83993	4.92347	0	0	0	0	0	6.57552	0	16.1957	0	0	5.87934	0	2.67577	0	0
PCHAS_0408500	334.839	336.723	323.985	352.657	306.166	250.142	284.731	226.557	222.989	219.638	117.699	135.153	208.88	163.917	195.632	241.576	213.824	252.347	282.501	325.843
PCHAS_0408600	3316.75	3073.64	3354.12	3308.52	3238.83	3228.29	2984.8	2692.07	3455.23	2518.11	1904.16	2403.49	2553.52	2103.91	2994.64	3239.52	3253.08	3085.83	3421.6	3548.28
PCHAS_0408700	31.8883	32.462	37.9442	31.316	38.0571	14.0498	18.3792	19.1323	11.7049	14.4839	10.4261	16.0393	10.5053	9.47706	17.7805	27.9666	21.3604	32.1092	36.0023	32.3252
PCHAS_0408800	71.356	88.692	98.7384	95.1376	91.0843	64.0385	70.7078	76.99	81.4381	55.8503	35.5078	64.538	37.2501	70.1303	46.9385	65.2607	58.5695	80.8082	85.1916	97.2475
PCHAS_0408900	22.8674	25.2874	25.0251	28.7361	24.4023	14.0391	18.3545	19.2074	9.81737	18.4527	7.23761	13.895	2.29346	13.5424	5.49549	7.43635	5.99565	8.00885	14.4767	19.4803
PCHAS_0409000	75.5253	86.5426	82.2298	79.9216	83.5075	76.5632	76.884	60.9562	71.5907	70.663	33.9568	57.9897	24.5539	24.9194	31.5187	30.9188	24.0711	32.7068	48.4338	63.5493
PCHAS_0409100	1.42247	1.12214	0.875636	0.573102	0.910769	0	0.389862	0.130342	0	0.162871	1.76927	1.87125	2.99596	8.84526	1.86462	5.04246	8.18816	5.66973	1.4066	1.5508
PCHAS_0409200	25.9669	23.8404	28.606	25.8081	25.2778	10.0826	13.3453	9.83437	6.22444	11.0469	23.3437	9.45211	46.5074	16.8602	32.1359	33.028	34.7214	36.6674	27.4571	30.0529
PCHAS_0409300	42.8946	46.9185	52.9611	52.9611	47.6282	28.95	43.1917	48.9438	24.1604	50.2283	43.7022	42.8574	53.8199	42.4012	48.8631	57.191	55.5586	64.7834	49.3638	49.5602
PCHAS_0409400	1.77712	2.98512	0.980783	1.84552	0.602807	7.66318	10.3711	14.5993	6.91622	21.3442	60.8142	27.0378	5.49118	12.3843	13.3666	4.15291	3.58881	4.91412	1.05034	1.89494
PCHAS_0409500	79.5132	83.1267	94.7245	91.9848	99.8881	53.6314	66.9291	62.8374	57.5261	40.2175	45.2485	38.7253	99.9192	62.404	72.7914	84.4034	97.9547	80.3184	94.0914	95.4856
PCHAS_0409600	128.158	213.145	218.969	213.876	227.227	122.933	172.353	198.061	92.7196	136.525	233.635	164.734	215.794	33.856	134.176	142.483	107.649	213.914	169.892	186.709
PCHAS_0409700	143.491	225.279	230.326	233.628	224.069	101.741	183.822	197.173	99.1471	133.59	240.598	209.547	201.992	108.609	162.098	149.325	104.912	229.406	214.165	209.115
PCHAS_0409800	9.2378	19.2563	19.7134	13.3582	22.0037	11.0219	18.0311	25.2614	12.03	21.5223	61.3715	32.9696	12.7966	32.4677	15.8789	12.1942	10.9769	12.7842	11.1294	11.3849
PCHAS_0409900	102.499	112.448	112.281	115.701	108.924	66.9683	77.2763	97.9838	45.3305	83.2194	54.8772	64.8403	68.7817	142.858	67.3484	90.1499	78.4063	112.184	107.393	121.301
PCHAS_0410000	140.199	123.478	138.223	139.252	125.984	85.7932	111.034	104.875	59.2817	96.0161	57.1137	81.4934	75.9416	82.2101	95.0689	109.288	116.754	128.514	132.808	130.845
PCHAS_0410100	17.1014	19.1398	23.5857	20.1048	24.4786	12.5982	15.0915	13.3075	7.35455	12.4518	8.40046	8.51117	10.4112	14.9799	10.3757	15.9311	12.4028	16.8524	18.3766	19.6465
PCHAS_0410200	116.786	122.845	125.764	120.381	124.749	93.4176	105.182	98.3849	70.5507	85.8545	43.2092	66.7952	32.2991	81.2942	45.994	72.2857	63.5392	71.8798	105.924	109.008
PCHAS_0410300	13.9401	17.0779	2.24166	2.10365	3.45999	1.202	2.06951	3.38586	0.751039	4.41482	11.8896	7.94653	18.2721	64.9354	21.9861	30.4185	45.9179	30.676	7.44902	4.99979
PCHAS_0410400	1093.11	1234.19	1392.08	1078.34	1515.87	555.674	707.173	497.555	610.814	407.873	797.83	509.14	2962.36	1556.55	1649.47	2156.14	2197.52	2573.83	2058.5	1429.4
PCHAS_0410500	12.9495	21.065	20.9638	15.5528	23.8547	8.8413	13.0461	11.2765	6.39653	7.04538	7.03968	7.02544	3.33441	10.8289	3.34809	6.17331	5.52072	6.94126	9.69453	14.1532
PCHAS_0410600	89.1051	58.5184	9.38558	8.97494	19.0863	5.95232	16.6066	8.16474	10.7112	9.79433	65.6662	42.667	93.8351	653.81	158.383	278.147	428.619	238.971	49.9296	19.0756
PCHAS_0410700	134.387	170.507	144.088	160.562	152.934	176.16	208.633	259.185	154.12	247.36	243.987	267.52	43.2639	107.092	75.3122	45.6803	44.4822	45.1098	80.9881	117.163
PCHAS_0410800	5.92473	8.54438	7.9844	6.54569	9.94702	2.73335	6.59676	5.51369	3.21481	4.13385	4.86482	5.69932	2.99555	3.74171	2.68181	5.77179	3.31314	7.53783	5.0246	7.51439
PCHAS_0410900	179.969	175.586	174.211	175.868	163.349	159.368	127.139	92.4046	181.836	97.6514	38.9732	71.2577	27.5839	17.9165	50.6102	63.6857	69.2264	59.0622	117.765	170.197
PCHAS_0411000	37.2712	45.7738	40.7106	40.7259	43.7173	44.8156	36.6814	34.2552	39.2216	38.5369	30.7297	34.4695	28.329	56.1845	35.6799	38.9769	40.704	44.2669	41.8191	37.2756
PCHAS_0411100	12.2064	13.0786	10.1515	10.7349	9.00668	16.5596	14.2807	14.3956	13.708	19.977	12.3357	11.6317	5.89523	22.091	7.658	7.90183	6.91543	7.04262	10.9293	9.07643
PCHAS_0411200	95.5728	212.617	195.453	172.854	255.375	79.5386	165.295	224.134	68.2805	151.15	188.743	196.812	52.0386	72.4296	39.0195	38.3217	24.617	69.5173	105.511	107.234
PCHAS_0411300	17.0887	20.0959	5.39976	6.84224	4.80897	64.7568	74.2212	97.2379	102.381	140.005	263.469	185.972	28.1228	119.874	85.4365	37.327	39.9763	22.128	4.63961	9.09827
PCHAS_0411400	108.852	124.091	116.948	102.979	116.021	84.9584	117.085	129.852	85.5199	119.777	238.916	146.698	157.277	144.197	167.929	143.238	140.063	155.711	119.127	117.163
PCHAS_0411420	17.4698	19.1956	15.5335	16.3393	11.3307	21.673	22.2302	23.7829	27.0837	48.2924	2.52212	8.53597	6.21205	0	21.2643	13.5305	24.3596	18.4738	3.56468	9.64666
PCHAS_0411440	19.6957	34.7164	35.0254	12.8948	20.4923	68.4163	30.7017	43.9903	21.3742	47.6398	17.4162	33.6825	0	0	4.1954	6.67385	8.01015	15.1868	10.5495	25.3768
PCHAS_0411500	3081.5	3178.42	3443.61	3326.09	3316.83	2552.83	2747.78	2614.4	2759.71	2406.73	2031.49	2213.4	2713.79	1955.98	2723.8	2959.33	2658.12	3209.33	3607.86	3495.97
PCHAS_0411550	0.371428	0.714209	0.49539	0.729523	0.421582	0.967662	0.330847	0.221222	0.40308	0.552866	0.187681	1.27039	1.38679	7.5063	1.26589	1.00686	1.8127	2.74941	0.530523	0.957127
PCHAS_0411600	60.2522	74.1853	74.5378	72.3458	73.3437	42.6037	61.518	66.3822	32.0473	47.8554	29.8434	45.6145	29.6392	0	40.1771	48.0953	30.2187	58.4681	61.5688	65.6645
PCHAS_0411700	103.942	105.442	104.575	106.417	96.8593	94.956	97.6889	103.44	78.3383	95.1447	49.8747	73.0619	54.5968	62.8526	66.3876	83.8638	81.2171	86.6343	91.8842	103.659
PCHAS_0411800	21.6888	31.0741	31.7633	28.7334	31.6647	23.4882	30.0014	33.7382	15.5067	34.942	33.7801	40.1454	12.0674	20.6265	18.2623	12.7962	6.64147	15.1102	18.9517	25.9721
PCHAS_0411900	35.2293	41.7201	43.556	34.2674	48.2374	32.6332	38.8516	47.5603	29.8569	51.4394	56.2855	47.05	20.0433	13.5611	21.1547	20.9188	16.3743	27.7334	24.9199	33.2866
PCHAS_0412000	19.1674	20.8002	23.3708	21.7432	20.176	17.7989	20.116	18.7631	13.5926	17.5137	9.87698	17.2009	9.44749	11.5057	15.6847	14.2758	12.0403	13.2283	13.2821	22.74
PCHAS_0412100	13.2527	13.1913	14.4178	11.5347	13.1545	6.76991	8.05499	6.8718	6.09122	6.38208	3.70278	5.59934	3.1047	3.15091	4.3839	7.50201	8.62368	8.175	9.68732	13.7607
PCHAS_0412200	11.4771	27.8542	4.55759	4.96075	6.40804	2.51592	3.17613	5.04386	3.14403	2.81961	26.0125	15.2447	25.7943	103.587	37.9767	62.9791	55.4685	41.5161	14.4833	8.18343
PCHAS_0412300	58.5096	74.4055	72.2737	70.8016	76.8819	76.0638	81.7643	98.7714	79.3378	78.0513	70.5773	101.857	15.9881	37.7624	31.245	21.5274	16.3387	19.7389	39.0332	55.8249
PCHAS_0412400	20.1114	26.413	27.7877	27.1084	25.8109	20.2047	36.5306	47.6784	19.0436	42.7021	45.0324	53.2759	2.69928	11.954	13.6078	7.08193	3.52828	4.98666	11.8283	16.5128
PCHAS_0412500	3.2499	5.30973	3.34298	3.00383	3.51997	2.43489	5.33555	5.46532	1.52138	3.69921	4.12149	2.83338	2.53784	18.0293	2.06321	2.24562	2.69527	2.20126	2.0024	2.46312
PCHAS_0412600	232.973	231.33	242.509	254.967	243.989	216.581	214.449	235.039	222.337	213.599	94.1321	180.359	61.8626	104.821	99.4354	109.259	101.956	125.58	188.298	215.801
PCHAS_0412700	184.946	221.751	209.172	213.654	215.373	178.988	208.724	257.207	173.08	185.809	257.265	243.376	283.997	148.761	259.239	243.191	262.447	262.604	219.48	193.637
PCHAS_0412800	9.56474	10.7042	9.04459	12.5241	9.76489	12.657	15.9576	19.17	8.23795	18.0787	19.0252	19.2131	3.779	6.1364	6.46791	3.90976	6.42147	4.8699	5.20443	6.45522
PCHAS_0412850	12.9898	13.8264	14.2187	15.0439	12.9873	14.7421	16.0401	18.043	9.56748	19.5445	15.876	16.8412	4.90248	11.3725	7.83141	10.9324	7.01842	9.25671	10.3151	12.1446
PCHAS_0412900	12.0813	12.5962	9.59638	12.6554	9.01984	11.7505	12.0526	18.4207	8.04129	19.6612	19.3719	20.9362	2.00477	13.0215	7.137	4.58495	5.24095	4.76954	5.52194	7.47168
PCHAS_0413000	251.168	265.039	277.153	246.531	258.761	164.869	177.16	149.127	171.904	129.886	168.821	117.634	408.963	142.984	294.384	320.719	337.619	335.086	294.469	295.002
PCHAS_0413100	129.338	179.765	189.816	160.553	212.398	90.5798	125.943	138.053	92.0639	105.574	201.683	153.007	276.357	56.2113	164.709	172.161	159.123	210.18	195.332	144.544
PCHAS_0413200	15.4439	27.8511	25.1368	19.194	33.2759	19.5493	18.1866	29.6218	18.7484	16.754	64.0169	26.8589	31.926	10.58	31.6704	24.8351	28.1046	29.3873	22.059	18.5495
PCHAS_0413300	0.67929	0.870792	0.6644	0.800516	0.462608	0.589906	0.484057	0.728251	0.442306	0.808891	1.23567	1.39402	1.69083	2.74559	1.15757	0.920702	1.54708	2.17892	0.679176	1.05027
PCHAS_0413400	0.345048	0.796181	0.184083	0.0903613	0.104437	0.359574	0.614698	0.575429	0.449343	0.61632	7.46222	1.4162	2.57659	8.36782	2.82236	1.30949	1.57169	1.10679	0.394275	0.35566
PCHAS_0413500	43.6949	51.741	60.3631	53.3352	55.199	30.442	47.4967	50.873	25.4506	35.2755	39.7917	41.3729	17.2052	14.9668	27.7647	34.4634	28.1115	45.5316	44.4281	45.9611
PCHAS_0413600	17.7892	37.3517	17.9992	36.5461	26.4575	48.4759	67.7534	80.3773	33.9504	67.5669	52.6927	61.893	16.0321	24.7935	13.0665	12.887	24.9475	18.9196	10.514	9.48426
PCHAS_0413700	514.062	493.042	528.134	518.959	503.663	487.591	489.213	490.196	501.793	443.245	314.664	386.265	493.259	322.968	415.308	458.846	461.029	459.387	478.214	507.564
PCHAS_0413800	1.8657	1.55458	0.635916	0.651453	0.376466	0.648081	0.720138	0.333362	0.202469	0.555413	1.44551	1.06354	2.63156	17.5954	3.02034	4.25673	7.08186	3.68278	0.66621	1.36218
PCHAS_0413900	8.02628	11.4166	11.8619	10.7496	11.2316	7.00197	10.1201	14.9307	7.15911	14.7292	16.4818	14.6662	7.93658	11.8506	9.43057	8.09695	6.91603	9.67604	7.74749	9.20808
PCHAS_0414100	113.452	169.852	177.21	172.409	191.956	78.6269	179	236.09	94.0625	183.663	322.201	238.865	105.812	78.0996	99.7234	90.916	70.0524	146.097	126.168	146.532
PCHAS_0414200	118.578	172.14	182.009	163.834	198.467	88.6537	114.249	109.757	87.4928	86.8869	49.4676	72.519	22.1527	52.9	32.5626	45.4128	33.2145	50.0553	108.052	159.863
PCHAS_0414300	15.9897	11.5945	2.44138	1.48039	2.81092	3.64675	4.31596	7.6957	6.30992	8.89511	15.5061	6.629	47.4385	143.618	36.3304	53.4144	75.1449	39.2541	13.1495	4.16197
PCHAS_0414400	32.6372	28.0166	29.538	32.2803	27.9595	29.4561	27.0986	23.6735	26.0579	24.29	21.5566	20.5317	35.2513	35.3343	33.9658	33.1771	34.89	29.1921	30.8836	32.4394
PCHAS_0414500	103.299	138.11	148.538	115.446	149.918	78.4931	109.265	101.179	77.5079	92.1954	115.811	98.6789	170.745	97.8562	105.549	80.3966	72.8631	127.192	118.152	121.657
PCHAS_0414600	4.49049	6.85289	6.65463	4.47989	6.14856	7.05643	7.61879	2.54717	1.85644	7.00232	9.94046	5.11958	18.0966	8.64281	11.2961	12.1727	13.2186	11.3437	7.02476	4.40818
PCHAS_0414700	8.44569	9.79554	8.04599	8.16244	7.3037	7.68362	4.29881	6.22791	10.0383	6.28564	2.84504	4.81444	3.50371	0	4.11205	4.36083	7.85101	4.21743	4.02108	5.69998
PCHAS_0414800	47.8287	66.6549	74.8202	69.1235	83.3451	37.9159	61.8716	61.7014	31.4442	49.6278	29.0813	44.1211	7.90378	16.0429	14.5422	13.9874	15.4968	19.8322	31.7482	49.8621
PCHAS_0414900	24.3344	24.3105	25.4299	28.2472	25.542	20.1463	26.787	30.9975	15.0523	30.1007	17.7385	21.2012	4.73568	8.68212	7.68697	8.36001	5.69089	8.13952	14.2449	21.983
PCHAS_0415000	110.896	120.158	110.49	119.061	113.008	104.042	118.476	110.475	99.5718	108.325	82.0511	92.0014	26.6994	46.69	55.1178	49.4312	56.9127	47.0295	64.584	102.059
PCHAS_0415100	37.8068	41.388	42.0671	40.5368	45.1592	24.1537	30.128	24.6404	18.0496	27.6694	10.0991	20.5557	5.21841	16.9475	9.52695	11.9346	9.77687	11.8978	26.8506	35.2958
PCHAS_0415200	16.2833	26.0066	12.5797	16.9522	14.2402	22.4859	36.1415	50.5582	26.0718	52.0508	110.873	86.279	12.9566	48.5517	34.7988	13.025	15.1988	12.0204	8.19746	13.0695
PCHAS_0415300	436.425	406.266	443.44	378.669	472.084	574.517	552.414	601.512	737.443	643.509	804.145	916.322	354.327	584.043	618.59	581.733	555.268	563.959	610.531	500.416
PCHAS_0415400	498.669	526.422	571.613	491.47	552.239	307.132	326.943	245.7	267.098	227.378	246.297	202.219	632.607	454.147	558.918	671.54	626.698	718.85	674.054	584.253
PCHAS_0415500	2788.41	2874.46	3189.57	3027.15	3212.11	2235.91	2360.29	2131.53	2399.7	1972.1	1710.91	1824.98	3113.2	1536.44	2822.57	2859.51	2787.29	2999.72	3343.15	3163.85
PCHAS_0415600	45.5901	65.061	53.6085	39.8736	54.2292	21.8853	28.06	23.87	14.0544	20.1888	136.804	29.9292	251.788	102.568	134.503	98.5594	95.0908	112.814	77.3665	59.0784
PCHAS_0415700	77.676	85.694	84.6938	78.9015	87.0365	95.6635	91.4137	88.602	145.09	117.255	150.178	145.986	154.285	63.4253	170.338	158.454	154.697	132.419	126.861	97.2504
PCHAS_0415800	1.30693	2.23382	0.387357	0.684516	0.59336	0.302655	0.310436	0.622722	0.756426	0.907826	2.99373	2.38403	1.95185	14.0864	4.15728	4.01516	7.08694	3.65471	1.49338	0.673559
PCHAS_0415900	27.5919	36.7243	26.8814	31.2886	32.4664	38.2921	45.3914	69.5089	30.9461	55.0221	98.9949	100.242	23.6598	53.36	30.821	21.6513	21.906	23.9423	15.651	23.3034
PCHAS_0416000	5.16361	5.61202	4.39167	4.99743	3.73735	10.528	11.9985	16.3132	7.55273	13.0327	19.6253	18.0449	2.51467	0	4.39961	2.89077	3.28698	2.63125	1.443	2.60335
PCHAS_0416100	35.0119	44.485	30.0293	38.1362	28.3686	89.8691	76.7243	109.986	109.615	106.996	172.529	168.498	18.5094	100.186	68.639	36.1159	37.299	31.3447	20.8	28.7431
PCHAS_0416200	20.4284	22.5092	22.5815	25.4592	24.4345	13.0914	19.8368	25.6096	13.5711	23.8415	34.884	22.1185	8.63466	27.696	19.9967	17.9365	16.9995	20.1305	20.4311	20.7476
PCHAS_0416300	12.9495	18.0572	10.1065	15.3614	9.67581	45.4051	54.8166	98.8383	43.6127	104.895	141.45	148.284	13.6408	21.3297	34.5877	14.0302	11.2264	10.3668	5.62422	9.153
PCHAS_0416400	163.528	195.77	173.473	184.113	182.594	156.013	174.772	196.34	121.348	203.5	118.061	182.986	61.0483	94.8863	81.1679	103.077	91.4554	103.198	141.185	161.027
PCHAS_0416500	70.625	73.5651	73.1967	72.7863	68.2722	58.8205	58.6155	69.9665	38.9145	68.0104	52.1496	54.9494	62.5434	54.5458	59.1351	63.2356	57.707	64.0598	61.315	68.806
PCHAS_0416600	44.0427	48.7488	34.3307	39.1239	36.85	88.2891	90.2133	115.79	113.7	119.562	131.174	131.394	31.391	78.4204	62.4887	39.1831	44.8193	33.5112	29.6525	33.9979
PCHAS_0416700	0.385753	0.918361	0.538996	0.505105	0.708885	0.287137	0.490866	0.722083	0.239215	0.574188	1.61504	1.31938	0.548675	4.45474	1.31471	1.56854	1.43437	0.815842	0.708407	0.639025
PCHAS_0416800	2.04991	1.64238	2.27838	2.34863	1.93892	1.33513	4.56485	7.93599	1.1123	2.66985	36.2532	7.88767	10.2049	0	3.05656	1.73651	0	0.632249	0	0.330148
PCHAS_0416900	1258.22	1237.33	861.611	1546.16	688.107	2602.74	2537.32	3291.37	2223.07	3776.65	2888.16	3377.12	353.1	1035.52	967.298	326.946	295.053	207.79	207.074	704.817
PCHAS_0417000	0.978983	1.92969	0.720716	0.468645	0.836368	0.182831	0.468828	0.313484	0.297018	0.611085	1.86168	1.15214	1.80794	3.82927	2.0091	2.93916	2.32895	2.27271	1.00739	0.474706
PCHAS_0417100	24.362	31.0792	38.2483	27.1224	37.8929	10.3227	17.6118	15.5614	7.28005	11.6496	26.8798	12.2774	58.882	26.1629	28.9802	34.7747	32.1648	45.1562	32.6117	29.9485
PCHAS_0417200	43.2346	41.5479	41.1654	38.4688	37.0281	32.4377	39.375	50.598	24.7427	61.5561	65.7224	59.8342	61.8827	52.694	55.0757	54.9834	55.7338	59.3612	46.813	44.3767
PCHAS_0417300	55.3504	68.0818	70.1371	81.2785	78.5091	62.6623	86.6293	111.045	50.0965	85.3902	96.2469	101.938	20.6381	45.2871	24.8215	17.3126	11.6655	10.2291	30.4072	51.9709
PCHAS_0417400	48.3489	51.046	48.8489	58.4153	51.111	34.2336	48.9356	55.9961	19.6875	66.7868	25.8573	40.3905	6.31904	19.5996	10.0619	9.66542	7.33167	9.78308	24.038	36.605
PCHAS_0417500	46.6664	71.1487	39.8343	64.201	45.3874	83.213	116.833	195.08	81.2992	158.559	238.192	234.949	31.9046	75.4475	63.8308	34.4086	31.9859	31.3196	20.4409	34.4727
PCHAS_0417600	101.857	133.867	98.2813	116.542	82.6657	208.16	221.525	334.523	225.258	296.529	478.633	395.636	40.7892	77.9225	133.054	67.939	57.4979	48.7584	59.6628	91.079
PCHAS_0417700	145.704	152.867	147.973	148.511	137.289	124.806	137.535	144.364	82.4395	140.356	117.075	121.453	179.963	107.108	131.334	125.172	134.07	143.904	123.518	138.224
PCHAS_0417800	94.8299	139.529	132.086	140.074	140.332	62.4737	83.2206	111.848	66.9175	68.1428	71.2854	76.6924	79.0682	37.7624	63.684	71.547	56.2354	93.94	106.09	114.96
PCHAS_0417900	107.091	143.978	146.606	128.255	143.54	125.89	120.401	110.065	90.7061	112.749	169.267	96.0373	355.144	65.9828	184.161	171.702	152.968	195.36	145.034	128.305
PCHAS_0418000	0.291074	0.780184	0.376454	0.589022	0.42048	0.873215	1.17851	1.63907	0.861485	1.221	1.47078	1.53858	0.329324	1.06952	0.360737	0.286922	0.602652	0.261164	0.188977	0.409125
PCHAS_0418100	244.395	189.875	32.7372	28.5378	61.8036	12.8628	43.3501	36.7999	25.2592	28.3464	196.09	104.94	270.192	1633.52	388.345	696.917	1030.6	671.944	132.982	47.7104
PCHAS_0418200	76.047	93.9905	89.8784	89.3198	92.6926	52.4362	68.8863	71.8081	35.8301	62.4269	40.6806	51.8848	39.1165	58.1079	48.9977	58.995	61.4526	73.3925	74.349	80.2891
PCHAS_0418300	118.859	153.2	137.16	136.499	145.844	173.16	201.042	286.07	202.292	291.241	438.298	422.637	136.206	131.26	197.288	153.837	135.773	169.274	145.186	133.477
PCHAS_0418400	2379.91	2527.73	2621.34	2428.91	2676.73	1846.61	1963.76	1812.87	1725.48	1811.29	1464.08	1617.61	2636.14	1506.21	2533.85	2595.91	2405.43	2818.07	2937.35	2655
PCHAS_0418500	21.4917	29.0811	4.86893	3.28854	6.667	1.50168	4.18078	3.82542	1.69786	3.06419	31.3723	14.9269	32.794	163.083	42.3768	67.8017	105.557	73.6516	13.6433	6.20656
PCHAS_0418600	54.0404	58.6438	38.7736	60.7769	34.5149	107.101	87.9316	105.004	116.13	107.118	59.0735	102.482	17.9794	108.13	41.9417	29.9147	48.3079	22.7735	16.24	32.4011
PCHAS_0418700	5.72911	5.58161	2.03764	4.70106	3.52591	3.71485	5.85162	4.73165	5.30545	8.64139	82.3691	15.6761	17.1124	43.2249	41.7851	16.4622	17.8944	14.1361	3.92787	3.54317
PCHAS_0418800	60.577	66.9033	68.957	66.6178	59.7917	55.1946	66.3342	85.4594	41.8888	80.9932	95.2739	89.5117	75.9572	40.8412	70.5981	66.6977	59.6697	72.8022	52.4629	63.4033
PCHAS_0418900	43.2117	61.7355	64.2315	54.9619	72.8058	13.1515	28.2383	26.759	6.90262	23.6316	26.1199	19.1651	69.7371	33.666	41.0333	51.5554	40.9785	72.8351	64.1361	57.6594
PCHAS_0419000	10.2616	17.719	3.54001	11.344	3.37324	31.2627	59.5377	91.2427	23.0632	117.77	137.108	120.156	11.7941	36.2631	28.38	10.2983	8.48352	8.19778	2.60302	6.14112
PCHAS_0419100	424.22	410.681	339.376	426.017	341.202	673.614	596.334	763.585	718.891	758.956	773.815	835.852	155.541	569.173	387.949	334.015	401.849	291.723	296.259	336.038
PCHAS_0419200	241.11	322.957	307.679	309.411	335.999	166.567	251.186	283.27	183.356	205.399	254.297	210.793	352.457	109.362	199.288	223.706	169.218	291.155	243.475	273.858
PCHAS_0419300	34.2762	45.8496	36.4401	37.0759	48.4897	41.4135	29.8675	53.6999	33.154	36.6011	37.2747	31.8572	38.9492	30.1173	32.3792	30.2984	27.8799	32.1749	28.204	32.6421
PCHAS_0419400	1.65408	4.39225	1.47075	0.928225	0.625811	0.615614	2.1048	0.422216	0.769303	2.28622	130.862	21.0133	167.04	57.3049	99.0571	17.2949	47.6661	16.7626	1.35005	4.87129
PCHAS_0419500	4.11719	4.79808	0.915213	3.79824	0.84966	31.8538	39.3407	48.5979	27.4175	54.3197	41.135	45.4463	6.52154	15.1283	10.5241	4.43895	3.65332	1.9625	0.935568	2.04956
PCHAS_0419600	66.2155	70.815	69.1301	95.1049	54.6785	77.2084	95.2641	71.6749	57.9306	81.2573	19.9246	28.9456	13.1947	33.8301	12.9952	14.4958	10.2877	11.7029	19.7922	40.1411
PCHAS_0419700	33.8397	34.4692	41.8806	48.9802	34.0491	37.1705	48.5537	36.6056	24.6146	38.6623	10.167	13.451	4.32536	25.8764	5.14315	9.17319	6.24889	6.31868	10.4507	26.5138
PCHAS_0419800	21.0558	18.6545	20.0232	25.1221	14.9484	16.2378	17.9587	12.2987	10.234	15.8521	2.05393	2.78057	2.02356	0	1.93951	2.64452	2.64503	2.10623	4.18027	10.9983
PCHAS_0419900	9.43998	10.3285	9.89064	16.7696	7.37059	17.4399	16.3887	13.6801	10.0487	15.3043	2.61285	6.99217	0.748316	2.43026	2.25416	1.38543	1.95628	1.26105	2.8341	5.88775
PCHAS_0420000	0.828116	1.41543	0.122722	1.44578	0.208875	6.71205	16.7198	14.1391	9.88554	20.9549	22.7354	20.7709	1.71773	16.7356	4.70393	0.93535	2.69432	1.02166	0	0.17783
PCHAS_0420100	21.6818	21.9461	16.5744	27.0412	12.6945	40.2987	33.5571	26.5284	28.4269	27.3809	5.94878	12.4155	1.5873	1.98268	3.42726	1.99461	1.43639	1.3314	2.94273	10.8077
PCHAS_0420200	13.8225	15.3229	12.0386	17.9509	8.48748	25.5817	24.12	23.4834	23.4843	22.1768	5.20971	11.8192	1.41007	6.8691	3.08915	1.53565	1.47451	1.11823	2.1847	6.13115
PCHAS_0420300	1.14944	2.21022	0.170339	0.752536	0	13.9746	19.4532	21.4509	18.295	30.5114	23.6193	16.3808	3.81476	7.74309	7.18203	0.778966	1.86988	1.18173	0	0.49366
PCHAS_0420400	23.3397	24.4004	26.7973	23.7367	27.0914	11.0198	14.1289	9.17741	8.36091	9.10681	67.3255	12.4005	124.086	36.6352	91.1299	56.5119	62.6665	69.3303	35.9261	30.6557
PCHAS_0420451	0	2.75571	0.955709	2.1111	0	3.73363	5.74443	8.96243	2.33287	6.39954	34.7591	16.5432	8.02619	0	6.41067	3.64207	0	1.32604	0	0
PCHAS_0420500	9.97258	15.0737	11.5142	6.2367	6.87034	4.3948	7.15942	4.60988	3.23057	4.2095	121.991	13.7454	195.248	36.0965	109.828	42.3658	74.5782	58.5783	15.3072	17.6435
PCHAS_0420600	16.6537	14.9072	22.0841	15.7908	22.596	3.24155	8.95163	4.61742	4.98562	4.27393	72.1079	8.83867	160.451	0	66.7892	46.312	39.2365	60.2206	46.5487	23.677
PCHAS_0420700	3.13319	5.07966	3.11367	4.34393	2.58003	6.24208	7.38757	7.24494	6.20034	6.44688	4.37703	7.5645	0.688133	7.44934	2.04146	1.37393	3.89771	2.72855	1.053	2.84959
PCHAS_0500100	10.4855	12.6014	5.82707	5.14865	2.14885	8.72636	5.0591	12.2301	8.06016	11.0553	101.108	56.7837	258.82	79.4641	120.61	48.8535	73.2055	54.9784	8.73646	12.1027
PCHAS_0500200	2.92903	5.75731	1.73626	3.57959	1.77308	17.9749	29.5688	30.9362	21.1909	36.6225	32.9551	38.7367	2.43022	7.89247	7.32059	1.58799	5.71786	2.16815	0.836725	2.01274
PCHAS_0500300	27.7429	42.2848	40.7895	25.4572	31.241	17.0733	20.2364	12.2301	11.8532	9.7547	72.8511	14.9431	200.64	88.2935	113.165	74.0205	92.3953	87.8576	50.8586	37.1524
PCHAS_0500400	0.409143	0.374633	0.415766	0.765332	0.619186	1.01516	0.728881	0.905115	0.634299	0.957006	0.472543	0.599736	0.436458	0	0.298806	0.0792211	0.190167	0.360546	0.250454	0.828389
PCHAS_0500500	30.0203	35.6492	36.0857	26.7633	31.0067	13.9097	21.8825	17.9678	11.4105	16.0163	107.549	21.6783	151.527	59.5767	89.839	52.6096	65.8613	68.7993	36.563	36.2738
PCHAS_0500600	0.212338	0.816596	1.13282	0.55607	0.803364	0.737588	0	1.26468	0.460865	1.26425	1.93127	2.17876	1.58559	0	0	1.439	0.690852	1.57178	0.303289	0.820753
PCHAS_0500700	0.793837	0.508816	0.176463	0.779588	0	7.92787	11.6672	13.9478	13.7838	14.4748	18.0505	21.0424	1.48196	16.0429	4.73468	1.34495	0	0.244841	0	0.255703
PCHAS_0500800	56.773	62.0404	44.067	52.098	39.9663	127.298	102.798	185.699	120.697	166.934	160.836	185.426	53.8616	122.258	81.2825	56.1353	68.8894	51.3829	32.2369	38.3731
PCHAS_0500900	125.887	129.669	81.2425	125.199	62.0148	285.648	254.847	305.409	316.898	333.275	192.509	313.141	27.1077	119.371	79.2663	40.2797	38.4358	34.6142	36.1199	72.5373
PCHAS_0501000	0.333673	0.370709	0.138455	0.174765	0.151492	0	0.0792578	0.291478	0	0.264889	20.3897	1.67384	6.09069	2.69732	7.73306	1.29647	2.24363	1.23497	0.254185	0.257951
PCHAS_0501100	0.792111	1.35389	1.87818	0.691461	0.998966	0.458587	1.41113	0.31452	1.71923	0.393015	4.00249	1.80616	11.8299	0	4.04947	1.43149	5.15436	4.56044	2.2628	1.70098
PCHAS_0501200	25.0835	40.6168	13.7929	9.07542	3.99586	14.9041	20.579	14.1534	34.3845	32.915	2526.24	256.249	1715.34	1640.82	1881.32	256.326	605.637	257.746	24.985	39.973
PCHAS_0501300	3.37381	4.0366	1.39994	2.06158	0.680777	4.68778	4.00692	2.41132	2.44088	4.68707	2.72762	10.7701	0.559851	9.09096	1.91642	3.04855	8.04971	2.77487	0.963784	4.63675
PCHAS_0501400	52.7088	62.6761	43.7193	70.9723	41.0977	78.1938	91.9293	107.785	59.7814	116.573	48.6277	83.424	13.2162	33.5322	22.4315	14.8429	13.4962	10.1669	10.8228	33.7067
PCHAS_0501500	1.65408	4.84662	2.9415	1.85645	1.07282	0.820818	2.52576	3.37772	1.53861	4.57244	194.622	21.8215	32.9376	19.1016	25.3683	5.76496	6.91928	9.03722	1.01254	1.82673
PCHAS_0501600	57.4119	64.6541	69.8613	67.9871	69.4911	35.9529	52.3616	49.8612	28.0494	40.1749	27.5074	30.5109	11.6715	23.1126	16.9554	17.3612	12.2792	22.8574	42.4718	57.6155
PCHAS_0501700	16.0102	20.5238	2.8226	2.71084	4.28193	1.4383	4.42583	2.95935	0.599124	3.69792	77.2723	17.9385	31.2626	178.513	55.2712	50.883	77.2373	60.1075	8.47691	5.33489
PCHAS_0501800	89.3647	94.6211	56.6316	86.9526	65.0059	161.643	131.495	209.667	126.985	180.052	117.754	190.822	30.7236	119.735	58.4741	40.4862	55.4199	38.3744	27.5031	54.0718
PCHAS_0501900	27.8146	32.6846	20.1976	19.4242	24.204	13.6876	29.7307	35.3415	11.0678	24.1509	868.103	99.8904	350.783	468.427	485.044	112.47	156.86	102.374	16.5535	28.67
PCHAS_0502000	75.8487	98.3437	95.212	91.3645	93.4053	69.5275	87.6534	107.033	56.2198	107.55	98.5702	116.571	52.1347	45.0837	70.9622	66.0166	62.501	83.4839	72.7558	87.0277
PCHAS_0502100	23.504	21.2593	3.713	2.96825	6.59043	0.621661	4.67605	5.25848	2.07163	2.66386	28.214	12.6502	35.3399	163.959	40.6627	67.11	95.8806	77.8654	16.7005	4.15053
PCHAS_0502200	17.8688	19.4826	15.7187	18.9011	23.722	9.94006	10.8753	11.5137	5.65874	10.3172	5.2696	6.08989	10.9215	20.5618	14.4123	17.4102	13.2412	19.3776	24.251	21.712
PCHAS_0502300	176.606	219.407	202.952	215.786	236.144	180.75	217.761	266.636	165.041	232.937	150.544	205.933	47.4797	57.6926	70.9811	72.4616	55.3066	76.8425	128.628	164.181
PCHAS_0502400	26.5307	37.2863	36.5755	29.64	38.1249	11.6255	23.1984	21.4554	12.943	19.383	11.9299	14.5687	5.14973	24.5948	7.67335	12.2064	9.50303	15.6149	28.8556	26.343
PCHAS_0502500	19.0379	21.6247	25.7131	22.4039	26.9879	5.85973	14.1673	18.0849	4.18436	7.53279	12.4204	9.06665	4.79873	9.74031	5.33859	11.1054	6.2725	13.3788	20.9967	15.5248
PCHAS_0502600	16.3034	28.125	4.79619	3.61085	6.46636	2.47372	3.61703	4.76488	4.14364	6.36002	54.8791	19.4856	29.1911	131.057	44.2555	53.4363	67.9318	48.4148	10.7776	7.7308
PCHAS_0502700	110.453	130.305	128.942	123.066	127.618	96.5558	139.409	172.547	91.1151	157.976	208.746	216.63	75.8843	72.4836	107.098	90.1551	84.3378	105.292	112.006	115.53
PCHAS_0502750	72.8742	69.4651	8.30732	13.8647	27.8071	3.78629	13.8701	11.5001	7.43528	8.80757	83.4023	29.8248	97.6725	440.562	106.671	200.078	251.286	250.507	41.3686	15.649
PCHAS_0502800	162.123	152.917	180.795	171.106	165.347	141.261	96.5954	79.4444	114.155	80.7085	53.7001	51.9272	105.272	65.7471	123.814	156.537	197.584	181.283	172.707	185.832
PCHAS_0502900	10.71	11.839	12.6627	10.3653	14.7987	2.89804	6.15248	3.32808	2.44243	3.40781	15.4507	3.45075	32.4535	4.70523	15.3411	13.9376	13.6352	20.1546	14.2443	13.4992
PCHAS_0503000	52.7103	82.0614	92.3335	65.7486	123.932	20.5471	44.9608	30.8461	14.5502	22.6962	110.389	26.9752	223.468	47.8161	94.5266	91.5752	87.2448	151.465	101.385	75.5353
PCHAS_0503100	1.2507	2.49401	1.23564	1.63767	1.05154	0	0.742701	0.827684	0	0.620551	6.74104	2.37653	21.1001	11.2337	9.23564	7.72252	4.97351	9.42948	1.38944	2.32766
PCHAS_0503200	14.9862	17.8299	17.854	15.3906	15.0457	6.12436	10.9932	6.65058	7.44073	5.97764	5.54324	4.6902	8.28941	11.8769	11.0163	21.7725	20.3957	19.6971	19.027	18.2993
PCHAS_0503300	98.9545	103.445	103.816	112.116	90.2883	84.6472	121.583	141.659	59.9686	156.408	133.739	145.26	56.9331	73.6828	67.1303	68.528	61.8144	75.9406	68.7984	93.4023
PCHAS_0503400	26.3547	37.2852	5.04902	3.00817	7.37994	1.20457	4.09272	5.06016	2.72834	3.22604	55.2826	25.2038	37.763	219.001	59.1668	77.1994	123.12	81.927	15.6021	8.54497
PCHAS_0503500	24.7507	15.3735	3.63009	2.67287	8.68848	3.10221	4.0911	3.95132	4.4305	4.17785	26.3021	9.59998	22.8645	144.386	41.7425	69.5145	102.943	71.7735	12.756	4.27389
PCHAS_0503600	48.2575	59.2554	9.07995	7.39564	13.7447	2.27588	7.88862	7.5892	3.62862	6.52394	52.2845	31.6818	59.1593	317.778	90.9357	139.389	226.398	140.032	26.8483	14.0306
PCHAS_0503700	2434.16	2416.88	2477.45	2360.74	2553.94	2048.54	1962.25	1550.99	2108.92	1577.33	1252.2	1436.81	2152.29	1463.73	2321.33	2462.53	2412.7	2506.78	2848.91	2595.01
PCHAS_0503800	47.677	55.1247	48.325	60.579	51.9222	43.3911	52.3149	57.3148	32.7668	52.6269	25.4935	41.8082	7.87922	31.4939	12.6972	11.8153	12.5173	12.7973	22.6764	39.5304
PCHAS_0503900	27.6488	24.5933	9.28181	9.69731	10.7276	5.75764	9.92655	7.14154	7.19505	6.19421	20.3146	15.4394	23.5255	156.795	34.8561	58.7934	83.7609	55.6037	12.3915	10.9052
PCHAS_0504000	32.7846	31.8729	20.9338	33.2765	18.4809	60.1896	64.0889	105.364	43.4582	86.2996	87.9436	112.885	11.5013	35.5733	29.0587	11.0344	11.4541	7.87218	6.28554	16.7263
PCHAS_0504100	26.4218	35.8211	36.5929	36.1363	41.5037	11.0521	22.6724	14.5833	10.6587	12.3545	13.6304	13.7211	13.9453	19.5694	17.0906	24.7495	20.9286	31.0608	31.8114	32.4387
PCHAS_0504200	33.5221	53.56	41.4701	43.2578	47.0553	32.9082	32.8888	35.8804	36.906	23.1407	108.014	18.2784	32.6505	78.5459	52.9851	31.6073	42.6781	38.9592	31.9205	38.8096
PCHAS_0504300	134.583	149.413	150.462	106.231	139.533	36.5317	52.9665	25.997	31.5788	20.9506	99.8886	33.5363	223.591	121.45	219.639	199.132	224.34	207.4	207.364	156.694
PCHAS_0504400	24.4105	24.4232	6.35265	10.9142	9.91131	4.13628	6.36393	4.96448	2.58446	4.43106	26.474	24.4363	41.4949	192.514	62.9036	85.5386	118.163	57.2929	34.0159	10.7395
PCHAS_0504500	49.6153	46.2313	7.20392	6.85338	16.0589	2.11697	9.70744	7.34499	3.11233	7.04365	49.3436	25.749	69.9583	368.039	92.7347	157.43	245.405	158.335	34.3071	11.0855
PCHAS_0504600	2.78077	3.67971	1.43568	1.76185	2.37568	0.623191	0.799017	1.28224	1.16816	1.20169	3.44478	2.76127	3.57246	21.7538	3.97437	5.59275	12.5496	7.85735	2.81875	2.77383
PCHAS_0504700	32.4316	40.7464	39.2918	35.1909	42.1394	20.4218	30.8448	19.8549	23.2766	16.1554	11.8826	11.4903	16.0808	20.8899	17.6147	22.0663	14.7137	30.6062	25.0994	33.6288
PCHAS_0504800	15.1109	16.8124	21.2948	15.6796	16.3962	7.92301	9.90443	7.64151	5.56932	10.6096	4.61007	5.36337	6.38704	5.76188	5.5873	5.60331	8.81242	11.0799	14.4568	15.4286
PCHAS_0504900	21.8498	22.4276	23.127	23.5703	21.064	13.0325	14.1987	11.4391	10.2948	11.9213	6.64007	6.38285	7.54832	7.8571	10.9317	16.5465	16.8237	15.3968	17.4925	20.8386
PCHAS_0505000	27.0021	29.6984	36.6212	26.0703	34.9413	13.23	21.7122	13.7045	11.402	11.2601	40.7728	17.6085	69.3034	29.7265	47.3567	41.9386	39.9953	48.8675	38.4179	34.3845
PCHAS_0505100	0.100047	0.513007	0.266874	0.393005	0	0.173765	0	0.238351	0.217145	0.148918	0.101106	0.684378	1.24514	0	0.170488	0.54241	1.95305	0.493717	0	0.257809
PCHAS_0505200	1022.04	928.625	954.451	941.982	906.424	1189.2	1091.97	1063.23	1273.17	1147.8	1200.79	1199.46	640.353	795.709	926.261	920.795	810.962	809.728	914.588	1003.43
PCHAS_0505300	140.904	138.86	136.814	147.868	122.239	222.505	217.589	243.435	253.618	264.071	194.286	243.883	33.9685	89.6328	91.8588	61.0394	41.6258	42.7221	75.2888	109.895
PCHAS_0505400	9.3342	13.3112	14.1994	11.5841	13.4737	10.0918	12.555	15.4057	5.77674	14.0054	17.6917	13.078	7.74461	13.6364	8.43223	10.3142	7.68382	11.377	11.3512	11.0606
PCHAS_0505500	52.1869	64.2286	45.5691	66.0149	38.0704	89.1925	105.403	159.817	69.1819	136.753	145.06	163.174	23.0759	63.1533	42.2466	23.0131	25.7571	21.5897	15.0271	36.6396
PCHAS_0505600	36.491	37.4572	39.6301	31.7367	39.4315	26.4272	33.3436	35.7688	26.0107	38.8832	59.6025	54.3451	53.9617	21.7699	48.6455	58.9498	48.1912	59.6382	44.8127	45.9755
PCHAS_0505700	78.7512	77.5977	83.6962	77.0811	75.4509	83.5295	77.1267	86.3408	92.9029	77.5635	77.3083	82.4134	40.228	71.2614	62.2588	72.8848	64.6928	74.559	77.6468	73.4494
PCHAS_0505800	11.4114	15.3917	17.6463	15.8516	16.1434	7.41083	8.48524	11.4656	6.89188	8.2713	21.6605	9.8424	40.7539	24.0643	20.9679	20.7122	22.5995	27.4222	15.7323	15.3422
PCHAS_0505900	87.9755	91.1689	88.4903	80.425	88.9345	79.0061	82.2714	64.363	90.2103	70.1151	46.9037	55.2837	40.2327	65.3305	57.8423	65.4105	92.4061	62.1022	77.5058	74.675
PCHAS_0506000	12.0772	15.4407	16.1174	12.3791	15.6766	3.66336	7.26713	4.41282	2.02173	6.04005	17.1066	4.2113	12.8454	19.041	13.0453	15.7162	13.3418	16.5641	17.7855	15.1469
PCHAS_0506100	4.57472	6.75973	1.30414	2.65212	0.924862	14.7386	23.5162	36.3154	18.7213	44.7549	134.848	77.5175	17.6455	52.2247	46.8932	13.7737	17.4974	10.6415	2.34434	3.59955
PCHAS_0506200	98.9994	112.776	77.6628	122.533	68.5635	145.899	213.729	324.246	107.396	372.348	345.796	380.503	56.6388	99.0226	105.7	43.5201	41.3042	37.3234	26.2448	61.7926
PCHAS_0506300	8.96071	15.9507	15.3984	10.4565	12.0853	6.77363	14.5573	19.9653	6.34851	17.9681	68.8318	32.5537	125.158	28.1486	51.6641	37.7572	35.4986	50.9214	21.1546	15.5533
PCHAS_0506400	26.4653	27.2622	27.3139	29.0844	32.3634	9.84982	16.8384	15.7627	11.796	8.79314	22.4472	9.69846	58.2289	28.6524	29.395	26.2626	29.2147	32.9421	26.3259	23.1386
PCHAS_0506500	47.2009	70.7376	80.3041	62.9517	86.3817	45.8073	66.4031	72.6874	39.2887	53.1641	93.8276	84.5481	57.1694	59.0038	47.9288	49.2018	39.5801	65.9165	62.6923	65.3297
PCHAS_0506600	27.5858	40.7053	36.3513	31.4434	40.9968	13.7876	23.3344	15.6027	18.5219	8.56671	33.8947	18.3272	87.9296	48.1286	49.7141	48.6871	70.3812	54.11	49.323	30.4287
PCHAS_0506700	216.306	201.721	132.673	179.874	128.802	337.874	340.891	414.929	305.34	451.21	397.821	512.087	94.1184	514.583	234.743	205.691	301.968	164.45	87.2861	123.027
PCHAS_0506800	56.4519	58.1125	56.6594	53.1986	57.036	36.582	41.1415	33.1132	29.471	33.4201	30.5777	28.5234	40.9835	73.4639	45.3664	58.545	60.5274	65.8201	56.0454	55.9287
PCHAS_0506900	22.3237	36.7064	34.6308	26.3875	34.7082	5.77462	12.6923	15.9228	5.15447	11.7158	24.6858	12.7642	49.9925	41.1379	30.7569	31.3609	27.5955	43.3624	30.5288	29.7244
PCHAS_0507000	13.0955	16.6028	5.63008	5.84137	7.18687	3.49917	4.87097	4.9712	5.62211	4.06985	19.1968	6.89081	8.23857	46.5319	17.6565	23.4059	34.1792	22.1924	10.0718	8.7145
PCHAS_0507100	27.684	38.0301	38.9801	36.1533	36.173	20.0237	26.1637	24.9296	17.5318	21.8606	12.022	19.8416	6.7629	8.90408	11.7627	18.5125	15.2906	15.7634	25.9068	27.154
PCHAS_0507200	573.094	542.979	489.154	578.677	495.051	806.574	728.216	711.846	984.678	757.331	468.28	675.49	134.647	391.904	314.808	271.141	275.621	205.247	357.896	506.292
PCHAS_0507300	1.35959	4.84134	3.35806	4.15392	3.5436	3.41089	3.7677	7.73782	4.26242	6.97065	59.5395	10.3338	12.7847	24.4235	13.9012	2.66179	3.93202	4.47292	3.66813	2.33567
PCHAS_0507400	0.90554	1.7192	0.529987	0.435263	0.815313	0.119451	0.469667	0.355007	0.149272	0.307113	1.85342	0.901718	1.48364	4.16969	1.81658	2.31489	2.4987	2.10708	0.900477	0.62029
PCHAS_0507500	93.3724	103.097	116.427	100.771	121.85	41.1765	57.8296	29.3269	31.6654	31.4884	15.4811	21.2075	20.8809	36.8552	37.6032	55.121	39.1608	68.6218	112.268	99.6274
PCHAS_0507600	204.959	222.842	209.916	209.729	224.018	158.213	159.576	149.2	148.283	133.33	75.1801	119.432	54.7955	184.092	72.4405	97.744	133.369	108.636	190.829	196.591
PCHAS_0507700	56.9721	69.0206	60.121	66.4016	72.9554	78.8345	71.381	76.4413	59.1094	68.0281	32.9002	40.6852	14.8043	75.9142	13.3359	11.8799	18.3325	20.082	26.827	49.2057
PCHAS_0507800	3.79553	6.4874	5.06227	3.31325	4.30804	18.6779	9.01557	9.04245	4.11898	13.1824	17.2607	10.8182	3.14916	0	2.15597	5.14442	0	1.56086	1.80709	5.70537
PCHAS_0507900	10.7168	13.8959	6.1336	9.51635	6.71111	23.534	21.2863	28.4663	18.9824	29.8867	33.2377	33.7053	7.05208	24.8941	15.3236	16.5289	16.8327	11.7017	4.22266	5.07879
PCHAS_0508000	2.0851	4.23212	0.463498	1.25136	1.11758	0.150894	0.154774	0.41396	0.565696	0.387955	4.30215	2.08006	4.75754	10.5346	4.14538	9.53816	13.2853	5.68074	2.85412	1.00745
PCHAS_0508100	0.319064	0.136338	0.472833	0.557044	0.0804771	0.55416	0.378938	0	0.230836	0.949844	0.322442	0	0.264728	0	0	0.288304	0	0.393633	0.30382	0.137032
PCHAS_0508200	272.331	268.129	268.872	273.816	235.73	195.442	245.783	309.7	142.5	299.878	357.219	301.761	447.997	232.628	347.753	300.126	319.571	329.958	247.806	265.13
PCHAS_0508300	8.0068	12.6327	8.76228	9.19376	10.0667	11.3391	11.4112	15.2603	6.9513	13.9349	21.2871	13.9034	3.67935	4.97882	7.34691	5.00877	5.21012	6.6867	6.33399	9.0466
PCHAS_0508400	5.44463	5.06209	4.04317	3.76046	3.03331	3.32532	3.62399	3.77734	0.649297	3.29513	3.9302	4.29742	3.12745	19.3463	4.48611	6.00098	8.37055	6.79091	4.70023	4.93368
PCHAS_0508500	92.0242	121.788	116.94	109.276	126.299	64.7087	84.9565	107.844	84.0979	79.8569	69.2783	90.4743	28.7482	120.469	60.9491	78.271	89.7006	89.1704	103.237	96.0063
PCHAS_0508600	78.211	133.876	137.039	166.867	153.175	71.1158	163.1	234.008	81.8803	138.329	179.465	198.267	28.6288	74.3806	41.5514	33.6726	25.4464	46.5421	64.3983	88.3221
PCHAS_0508700	18.571	25.0228	18.4411	16.3296	18.7707	14.1261	12.7989	20.9914	11.7685	13.1151	16.4388	16.6909	10.7971	60.2682	10.6258	20.394	18.0824	13.3788	15.2958	16.7668
PCHAS_0508800	35.9975	39.805	47.4006	45.6958	40.9621	42.4764	39.1627	49.0993	37.574	39.266	27.7699	39.474	9.57574	22.2132	13.5797	19.3672	14.3047	15.5945	31.3993	33.6348
PCHAS_0508900	42.51	51.2354	54.8766	41.7932	50.7614	33.3596	36.4816	33.3099	25.1353	22.7035	18.5542	19.3217	9.49143	11.4166	19.0126	28.1388	19.7584	35.0214	46.3961	51.8601
PCHAS_0509000	105.054	105.939	99.979	106.57	100.148	92.2092	100.38	81.8854	77.9973	87.2251	37.5822	56.1028	11.2201	65.7923	32.6463	40.222	36.665	34.9119	73.1482	93.4101
PCHAS_0509100	657.489	688.013	780.738	671.223	882.849	427.179	488.295	414.26	357.553	441.496	417.941	379.805	1186.86	661.98	766.222	997.188	877.316	1077.79	1084.7	785.859
PCHAS_0509200	59.9217	55.3699	63.4196	62.9664	63.3728	31.2034	35.647	21.593	25.2173	27.062	9.56722	15.6379	6.8283	19.5669	17.2325	26.6107	19.0759	29.3315	48.0184	56.1369
PCHAS_0509300	120.923	104.625	107.283	105.121	98.2675	92.6095	88.8083	76.1553	78.505	67.5468	102.308	85.1377	189.199	115.985	165.578	143.004	160.238	153.219	123.438	115.476
PCHAS_0509400	43.1261	43.181	38.9152	42.4305	34.6914	42.8015	46.7527	49.2748	33.8635	48.3528	44.3104	50.9009	18.1233	22.6376	28.769	26.8947	29.156	25.0725	29.0278	43.2977
PCHAS_0509500	27.9066	33.7413	33.8366	34.2571	44.7526	22.5821	24.5751	17.5655	18.9279	19.5892	9.93482	15.185	3.94673	12.8175	10.5378	12.8946	7.73827	13.1064	21.7417	29.6228
PCHAS_0509600	34.6326	51.8695	57.5768	46.6202	61.2874	24.9524	39.4418	49.8523	19.1309	33.5747	41.6625	38.6932	25.0493	14.0261	19.8694	21.73	19.4197	31.0817	40.3467	43.0125
PCHAS_0509700	0.270145	0.415563	0.144122	0	0	0.281517	0.288755	0.836668	0.586331	0.723792	16.3257	1.84794	2.95865	8.73509	6.07661	1.31814	2.63679	0.86653	0.231514	0.278452
PCHAS_0509800	0.963945	1.31919	0.694949	0.767548	1.06453	0.361991	0.580153	0.496539	0.141363	0.34901	1.07946	0.490089	0.616053	2.63252	0.887915	1.83619	1.52574	1.14102	0.781446	0.755262
PCHAS_0509900	232.793	364.474	364.074	355.421	417.749	121.456	216.374	170.984	131.807	167.091	81.8287	129.031	75.5799	148.761	76.8309	134.69	83.8234	148.708	258.907	297.569
PCHAS_0510000	115.908	164.787	171.312	158.632	201.304	71.2091	87.3183	87.395	46.166	58.274	34.8914	47.4461	24.5539	49.8388	33.62	54.3167	34.1008	63.1318	110.077	126.304
PCHAS_0510100	264.489	318.565	264.304	309.702	247.297	381.653	387.195	427.375	395.422	398.445	399.722	371.689	121.326	290.671	228.76	225.272	272.978	199.133	181.47	229.588
PCHAS_0510200	2.07153	3.63388	0.775548	0.856567	0.577499	2.08299	1.35962	2.72735	1.65646	4.46288	39.1147	7.64457	8.27716	19.8304	21.8306	6.20656	9.22294	6.38917	1.40155	1.40476
PCHAS_0510300	93.5145	101.968	110.148	94.1532	100.08	46.5902	65.7086	31.0661	46.4964	28.5599	20.3317	17.2029	36.1671	60.2346	55.5526	82.3108	65.4572	76.5302	89.6673	103.687
PCHAS_0510400	135.685	120.554	87.6303	99.9654	110.286	53.6416	69.8578	41.3369	37.6592	29.959	71.8924	51.037	86.3771	434.808	125.367	235.174	310.489	247.455	107.558	88.0816
PCHAS_0510500	34.4051	44.8445	55.6401	44.4454	60.8913	17.0445	20.5678	11.8274	16.7891	8.24884	10.0341	8.68743	14.3688	27.9988	21.6417	36.9303	28.5482	40.3095	52.9348	45.2215
PCHAS_0510600	1.3601	2.35377	1.26982	1.24664	1.38938	0.472453	1.09035	0.567052	0.147601	0.202449	0.962152	0.697789	1.01563	5.49733	0.927091	1.19825	2.21258	2.18136	1.06847	1.31431
PCHAS_0510700	1.57444	2.0183	0.699968	0.294511	0.425485	0.195324	0.200346	0.267924	0	0.167395	2.04572	1.53858	0.839777	9.09096	3.06627	3.65826	3.29306	2.08115	2.24883	1.01429
PCHAS_0510800	5.2053	4.4485	0	2.27194	1.96939	1.50679	3.09105	0	1.88296	1.29134	3.50694	0	0	0	5.91351	5.87934	11.2905	8.56246	3.71745	1.11779
PCHAS_0510900	1.97741	2.47854	1.79731	1.09323	0.831267	1.14481	1.64394	1.09923	0.858369	2.5509	92.1461	6.16212	37.1884	63.9393	52.4921	10.3633	16.0126	9.43295	2.13399	2.37793
PCHAS_0511000	2355.07	2286.81	2313.1	2238.25	2348.97	1956.88	1832.62	1635.86	1891.23	1665.43	1116.78	1402.82	2150.02	1422.53	2243.38	2533.24	2347.8	2382.45	2656.43	2518.37
PCHAS_0511100	1.05799	0.81375	0.752579	0.554132	0.960678	1.10253	1.13087	0.252054	0	0.31496	0.427676	0.723724	0.526689	8.55247	0.72116	1.14719	0.688445	0.783151	2.11562	1.36316
PCHAS_0511200	0.324751	0.832607	0.433136	0.283487	0.901028	0.0940063	0.482116	0.51579	0.117475	0.966776	0.765777	0.370247	0.943065	2.18766	0.184468	0.0733607	0.704399	0.200325	0.463853	0.48816
PCHAS_0511300	70.3753	72.6667	80.9555	68.0895	71.9527	29.5203	38.9538	27.3599	31.5061	21.6069	98.0459	27.3384	173.342	89.1217	133.39	106.344	115.98	106.772	82.6725	84.5189
PCHAS_0511400	39.2347	45.1931	47.7282	40.6524	44.6616	18.3693	30.5922	20.1846	17.2781	16.2505	11.9525	11.669	10.4736	4.59655	19.1857	23.2751	17.7603	24.6932	42.2332	41.76
PCHAS_0511500	252.294	238.234	257.125	216.905	241.31	164.839	195.416	192.401	166.657	252.96	838.155	281.657	795.766	732.512	826.267	482.229	583.441	497.581	366.717	272.834
PCHAS_0511600	286.925	277.282	311.851	297.969	285.008	325.906	279.584	273.915	313.968	302.158	194.803	268.388	135.874	206.845	176.741	211.788	224.224	218.872	285.561	282.21
PCHAS_0511700	99.8277	139.701	137.583	115.464	144.152	99.6957	114.115	96.1225	101.112	94.1083	59.6901	96.741	55.9084	134.496	76.5517	98.0964	89.3187	113.922	103.376	115.76
PCHAS_0511800	52.776	51.4358	39.6946	39.759	44.1745	28.5662	37.6722	32.0792	27.0676	33.0905	37.4439	32.7636	31.9415	73.0524	43.4274	63.2029	89.9712	77.3743	42.3376	37.7253
PCHAS_0511900	16.1943	31.1395	13.4994	18.5542	11.4881	73.2466	64.9121	114.136	118.627	125.547	268.33	181.168	31.0718	109.092	110.386	64.934	64.7636	28.7199	10.1197	11.7368
PCHAS_0512000	2125.03	2156.63	2206.09	2146.37	2222.22	1877.29	1817.37	1583.62	1939.64	1683.38	1105.96	1353.59	1840.48	1255.82	1976.67	2215.16	1955.93	2075.34	2577.11	2323.09
PCHAS_0512100	89.7821	63.2872	17.0928	12.5856	31.5716	7.58814	21.0147	16.1333	17.5427	10.7302	75.9418	37.3577	106.573	635.713	167.514	273.58	379.531	281.629	70.8277	21.6722
PCHAS_0512200	29.5237	36.5	39.237	25.3137	37.4457	10.4015	13.4766	8.88601	12.9983	8.75785	11.255	10.062	34.7825	12.7399	37.4199	47.4213	43.4137	57.2929	50.7237	38.175
PCHAS_0512300	22.7612	25.6227	22.7045	22.6658	20.6967	18.2713	22.4892	23.5816	20.1343	22.9187	16.9134	18.6447	13.3306	19.3272	16.623	15.5548	16.4912	16.7541	19.1239	17.7438
PCHAS_0512400	48.2714	59.3134	49.8439	53.8858	47.1307	70.3167	73.7097	107.317	94.6309	91.3869	125.441	96.6264	69.7661	98.9016	78.4678	60.3009	46.32	54.3387	45.1178	47.291
PCHAS_0512500	48.9898	73.0334	79.1871	61.0731	79.2324	16.3106	35.9693	23.3053	14.2678	15.6092	86.363	26.2312	173.366	50.6095	95.2182	72.128	86.5702	100.024	76.2333	71.5902
PCHAS_0512600	65.3388	63.9909	84.6716	60.367	76.1463	28.7157	35.4015	18.5583	25.8784	11.3583	69.2438	23.3808	175.694	57.8299	124.075	128.207	132.412	126.504	91.9631	80.0886
PCHAS_0512700	37.0145	49.0355	49.9638	45.7667	50.6335	25.6077	41.8788	53.5485	17.0074	34.0702	65.331	45.844	44.3984	33.3387	35.3154	35.3559	34.8875	44.902	37.8477	38.2591
PCHAS_0512800	388.06	362.19	382.961	376.723	406.076	386.742	368.296	312.959	402.9	338.495	278.566	294.622	68.6116	243.715	173.945	205.485	221.406	216.263	329.737	364.034
PCHAS_0512900	22.8644	26.0882	10.886	14.4385	9.0187	18.1659	17.333	16.9018	21.1173	11.9479	141.753	28.0088	64.3792	173.687	115.369	53.1888	84.415	37.4107	12.8547	13.7895
PCHAS_0513000	424.07	402.439	386.677	406.35	361.389	512.18	525.348	579.33	596.484	553.852	445.724	556.237	88.3901	208.013	235.914	177.177	157.397	201.907	288.155	393.215
PCHAS_0513100	7.52968	7.7639	2.91092	3.64368	4.83058	1.1372	3.2077	1.55988	2.84221	2.92378	33.2498	7.83806	18.3348	105.857	24.2677	21.5206	22.368	21.6081	5.37744	3.37445
PCHAS_0513200	8.17317	9.50267	12.5487	7.8398	12.5129	1.98075	4.74058	1.64151	2.99093	0.778035	2.97734	1.95032	3.3118	5.76188	4.45364	8.17955	6.33876	10.4351	12.0134	10.5919
PCHAS_0513300	12.5157	17.4392	19.8378	15.3906	21.0821	7.37192	8.1431	7.90809	5.43292	3.88789	11.8784	3.72238	26.006	0	17.4332	20.0614	16.9965	22.9598	18.1875	16.9671
PCHAS_0513400	14.1613	13.9215	16.8404	13.9924	19.7878	3.92325	9.75075	4.86404	2.45135	4.13819	3.07297	2.37721	8.86632	7.02306	7.55052	13.3063	11.3067	17.5781	18.4898	17.5744
PCHAS_0513500	34.4011	39.7494	47.2349	38.6099	53.3013	21.1357	26.8904	15.6109	12.1903	16.0235	34.4106	17.209	75.1431	18.9176	52.8399	59.6317	54.4402	75.4989	64.178	50.2035
PCHAS_0513600	4.41662	0.707716	10.3086	7.22891	15.4567	3.83546	2.95055	0.657633	1.19825	0	1.11585	3.77652	6.8709	22.3142	2.82236	2.99312	7.18487	4.08663	7.8855	5.69055
PCHAS_0513700	2066.61	1820.68	2827.45	1913.02	3409.7	482.462	955.849	171.906	497.174	172.84	489.623	305.857	1669.82	1625.13	1690.18	3042.56	2463.83	3403.16	3367.15	3126.58
PCHAS_0513800	0.231788	0.198089	0	0	0.116927	0	0	0.18407	0.167694	0.115004	0.0780808	0	0	3.12285	0.394987	0.104721	0.502758	0.38128	0	0
PCHAS_0513900	73.6436	83.1327	82.218	78.6184	77.9736	67.2941	68.0451	68.5753	46.5202	64.2162	44.8484	50.7523	10.2597	27.7665	27.8617	30.9131	27.2684	28.6464	64.761	80.5464
PCHAS_0514000	14.706	29.5269	8.1528	10.73	6.13369	67.3164	111.343	150.378	82.3916	224.039	409.099	322.092	36.274	94.8881	87.4842	35.3618	35.7409	32.4605	8.60446	11.928
PCHAS_0514100	182.646	172.211	159.129	191.566	155.96	223.735	178.672	185.781	230.663	176.678	132.972	180.958	168.337	223.142	185.021	173.351	181.118	173.114	170.853	183.757
PCHAS_0514200	60.8815	59.8736	59.3021	59.4215	51.1611	66.4201	64.0401	76.3483	51.0186	75.7454	66.0607	83.5369	44.8022	45.3403	49.7882	49.0685	47.6126	53.5962	46.3927	54.6599
PCHAS_0514300	0.847375	1.81044	0.753454	0.739702	0.427464	1.22645	1.25799	1.51408	2.45223	3.15326	46.2427	4.83043	9.84297	17.1248	27.1953	8.4225	7.81145	4.00743	1.8155	1.81965
PCHAS_0514400	28.9244	34.8638	20.4838	25.1374	25.6152	19.7835	27.8162	26.0697	16.2502	40.3866	44.7514	34.5816	44.9179	72.4211	31.842	43.3671	47.2619	46.5792	24.3129	22.0142
PCHAS_0514500	2.15924	2.42196	0.719967	1.06024	0.612699	0.468778	1.92332	2.57207	0.58581	0.803498	0.818287	3.6926	2.01546	0	3.21958	2.9266	4.39075	1.33194	2.31308	1.04327
PCHAS_0514600	82.7834	112.293	97.2232	116.125	107.418	94.4151	115.104	146.899	55.2849	121.372	84.2878	112.088	35.567	81.6094	47.1115	45.2604	30.8251	47.3289	64.9999	85.8495
PCHAS_0514700	53.5645	60.6119	69.1874	63.4989	64.8004	35.7965	43.5889	39.3863	29.9018	28.2172	19.7146	27.8955	18.1063	13.3642	29.2993	38.8399	38.0107	46.231	60.7656	57.5123
PCHAS_0514800	19.042	34.6361	33.1765	25.9444	32.9066	9.83243	16.0447	13.1805	6.14356	11.1077	8.58161	14.9621	15.3722	0	16.2246	21.624	23.4421	24.1273	27.1983	25.5291
PCHAS_0514900	24.2914	25.6252	33.9735	23.5241	27.7629	16.7002	20.7358	17.4821	15.3775	19.5853	49.6087	29.4254	18.2652	20.4547	30.1836	25.7221	13.1723	30.2808	33.612	21.5174
PCHAS_0515000	2219.38	1088.45	148.865	284.514	536.252	142.73	400.49	304.955	346.448	218.105	1477.98	685.057	2105.14	16056	3432.62	6747.97	10637.8	5820.51	1273.26	290.009
PCHAS_0515100	2224.39	1342.71	192.459	250.226	496.202	153.858	389.076	293.672	333.146	217.691	1525.84	780.337	2105.84	16877.9	3600.67	6694.73	10393.1	5630.8	1279.62	377.587
PCHAS_0515200	47.8076	88.201	88.1769	76.5572	96.7934	37.5895	52.367	60.0265	32.9518	41.3502	36.2353	45.2982	19.297	65.2808	23.1193	31.5233	21.0196	45.4311	60.9029	60.7648
PCHAS_0515300	7.3207	8.53138	4.43816	5.88215	3.65101	4.62357	5.63164	8.91858	9.38901	8.17257	56.8317	14.7957	13.2524	26.8993	34.023	18.9427	38.9754	11.2895	6.65407	5.14488
PCHAS_0515400	23.733	27.9629	23.7403	24.4495	24.2307	30.9151	43.368	69.2215	26.1342	70.003	107.312	86.2468	15.6372	24.6867	28.8454	14.7828	12.207	12.8099	7.72689	17.2004
PCHAS_0515500	38.8506	39.9934	37.5977	40.2086	33.6292	53.1636	59.7737	70.8203	46.42	71.9936	78.0281	73.8221	27.3504	39.6536	33.4367	35.504	37.9846	32.8008	29.2872	32.8655
PCHAS_0515600	111.424	101.542	100.952	96.113	87.1098	132.99	108.187	113.227	128.369	112.402	142.489	99.3389	113.041	106.72	144.881	107.362	134.013	99.0267	94.2832	95.2549
PCHAS_0515700	10.7004	16.3892	10.3794	14.5571	11.3567	29.4461	29.7081	46.5158	26.2408	45.0933	52.5239	62.7404	5.88036	44.9347	18.4713	6.40404	4.97351	2.74312	3.77133	9.31063
PCHAS_0515800	0.101046	0.518128	0.0898462	0.132309	0.15292	0.877497	0.180011	1.08329	0.877253	0.601621	0.612694	1.03682	0.251514	0	0.344381	0.273913	0.986275	0.124661	0	0.130192
PCHAS_0515900	30.0865	37.619	39.675	36.2437	39.8581	21.2237	27.2116	21.9445	17.4805	23.9763	20.6755	25.647	7.83451	11.2251	11.2005	16.5625	15.0597	22.7277	28.5609	30.0576
PCHAS_0516000	66.6835	78.803	72.2541	68.3091	62.0522	66.2586	89.1795	152.364	51.4304	150.04	227.933	202.617	104.994	77.7235	93.5501	70.7082	71.6468	86.9365	58.8312	74.0092
PCHAS_0516100	29.2227	31.6078	15.0219	13.7512	14.1658	12.6887	12.2015	9.24641	10.9014	6.11686	26.7635	15.6172	29.55	276.83	74.697	103.971	130.732	97.4543	24.1308	19.4142
PCHAS_0516200	13.5131	17.3226	18.6667	16.4302	17.7115	6.566	8.59763	5.55721	5.76111	4.90879	4.95849	6.32755	4.20445	9.75321	6.30514	9.9209	6.80421	13.7935	12.7526	15.4418
PCHAS_0516300	53.2212	62.0384	49.3488	60.7356	51.9374	141.798	145.443	158.892	149.265	184.578	157.019	200.372	28.0296	70.4399	63.7367	35.6135	38.3827	24.643	20.6799	36.0998
PCHAS_0516400	512.716	458.179	517.511	525.061	470.925	506.442	457.936	391.793	463.338	336.388	215.737	289.365	272.895	262.319	308.485	377.624	328.804	378.611	409.534	502.919
PCHAS_0516500	5.40973	10.9615	7.29277	7.312	11.092	3.63707	3.73058	4.78106	1.89378	2.33776	8.11233	4.17805	12.5967	7.05333	6.24487	9.22448	7.381	9.25754	7.22838	9.44338
PCHAS_0516600	111.724	118.267	108.97	118.469	106.531	104.285	126.014	160.519	78.2513	168.136	159.04	180.045	75.4093	116.356	107.458	95.1312	86.5265	97.9222	94.9642	104.562
PCHAS_0516700	87.3707	109.993	134.471	102.091	133.41	28.5804	63.1672	40.3702	32.314	31.7835	25.5385	28.1412	34.1329	23.7538	36.3872	54.4313	50.352	82.6553	104.368	103.738
PCHAS_0516800	9.14808	11.8841	11.5476	10.1603	10.6924	5.60359	7.20276	6.85937	3.90015	7.05155	4.29229	4.33017	5.28602	6.60271	5.84591	8.19233	6.90945	9.3211	10.4415	9.26102
PCHAS_0516900	73.5585	73.4629	75.6183	76.478	70.7316	50.9337	62.9094	45.1213	50.6543	43.287	16.6703	33.8519	8.2119	44.4488	19.9893	25.836	23.4556	26.0793	48.1698	70.0585
PCHAS_0517000	224.232	269.159	282.005	235.258	275.982	110.998	165.073	153.991	88.8621	152.124	255.618	147.133	451.501	217.786	285.623	297.755	276.617	366.707	286.969	255.733
PCHAS_0517100	379.361	374.216	339.364	340.971	305.962	559.752	455.343	526.751	592.716	590.705	649.451	622.469	872.996	621.407	723.096	562.891	621.514	517.1	380.176	391.226
PCHAS_0517200	156.018	129.115	151.018	135.116	135.242	124.341	130.176	104.687	142.523	98.4775	126.735	111.453	226.125	299.336	217.069	246.932	329.306	264.966	167.839	152.037
PCHAS_0517300	76.876	93.5986	88.7995	69.6357	87.9205	42.0681	63.4738	50.5959	40.7612	43.8905	78.7542	52.2273	199.216	163.164	142.668	137.978	161.608	172.796	120.584	106.739
PCHAS_0517400	49.5185	56.5762	64.593	54.8998	55.5704	28.6684	41.8281	41.3219	23.1812	34.4231	38.268	35.3225	52.9499	32.1091	44.2224	44.5052	43.6522	50.7462	54.2128	50.0405
PCHAS_0517500	81.1511	89.4268	87.7985	87.3727	76.5534	67.078	81.5304	94.6597	52.2255	101.63	91.3421	84.3744	94.9573	76.2793	80.1705	74.3629	80.7002	89.2239	64.5018	86.1478
PCHAS_0517600	199.484	219.235	232.789	202.731	217.787	130.832	153.866	167.623	122.754	155.039	353.103	182.532	737.782	322.316	417.291	335.728	346.071	420.014	271.086	248.804
PCHAS_0517700	90.4522	79.1627	10.5945	14.5951	27.1449	5.78556	15.977	12.8197	8.34223	10.8701	80.534	41.6294	96.9464	605.872	145.187	268.465	396.835	251.635	51.2391	18.4883
PCHAS_0517800	384.298	334.507	350.422	394.277	265.902	571.324	510.507	454.006	558.808	483.511	346.174	478.163	77.9418	153.41	191.342	174.91	139.955	137.356	176.192	309.313
PCHAS_0517900	78.6453	95.6186	103.719	91.8655	98.1127	59.2888	90.2117	103.567	63.2429	93.2008	93.9632	98.0488	60.3231	60.9828	55.7606	69.5296	57.6797	86.0899	74.0796	87.722
PCHAS_0518000	76.6644	82.2658	78.1241	84.5936	85.7127	56.8518	91.3066	97.4789	62.6318	76.2896	89.6634	73.6556	30.0176	69.6329	35.9634	42.031	36.4339	60.5748	57.2118	71.586
PCHAS_0518100	56.4113	69.3629	57.3244	65.9509	64.2463	57.4864	67.6809	77.4822	56.2211	63.8324	73.2968	75.7989	17.1935	58.1649	42.6698	42.1306	42.1387	47.5805	48.92	53.3995
PCHAS_0518200	1.43373	1.83791	0.910583	0.804566	0.697423	0.177867	0.54732	0.975914	0	1.06704	0.93144	2.45187	0.254907	4.13922	0.174513	2.63728	1.66597	2.27418	0.585096	1.45143
PCHAS_0518300	37.571	41.6343	45.1119	37.6201	39.9175	34.7133	35.777	31.248	38.7914	26.031	11.2644	18.7332	8.13202	11.6514	10.6434	18.8846	19.6959	17.0707	31.8415	30.9514
PCHAS_0518400	30.6543	34.1482	36.1042	34.2377	33.5611	23.482	29.0141	22.5895	19.1755	25.969	16.008	19.2295	5.4422	21.642	11.7097	15.4219	12.0496	16.5697	23.7087	32.9423
PCHAS_0518500	36.5251	54.7198	67.6926	49.2666	71.4261	22.1651	33.3184	25.6858	23.4006	22.9259	35.3553	23.3296	9.31057	44.4667	19.1225	26.5422	20.0447	30.9458	47.7701	46.4935
PCHAS_0518600	44.1045	43.9259	10.5582	23.5444	15.9165	91.3332	86.4286	131.747	76.5808	132.813	311.658	221.633	77.6911	342.816	117.362	127.835	151.223	115.521	33.4363	10.9281
PCHAS_0518700	70.3077	79.7023	93.3708	81.8846	86.5711	34.5305	49.9076	33.8015	31.3827	23.1364	14.7949	24.109	9.44749	29.2209	21.8677	41.1554	32.9306	49.2787	61.9575	73.8205
PCHAS_0518800	288.933	340.805	350.264	328.498	341.682	204.387	260.129	249.009	181.455	216.744	215.482	225.018	324.154	220.91	281.943	306.013	280.349	342.807	341.565	328.369
PCHAS_0518900	20.1458	22.6903	26.9211	20.8897	21.8087	8.39351	10.7876	7.35187	5.56042	5.02668	10.768	5.77522	25.2175	18.8269	25.0034	26.2005	24.4375	29.3077	21.2069	23.481
PCHAS_0519000	0.127581	0.654192	0	0	0.0965387	0	0.227283	0	0	0	0.644659	1.74545	0.317563	5.15664	0.217409	0.172922	2.07546	0.629592	0	0
PCHAS_0519100	15.3762	19.1513	5.69303	7.62153	2.34901	22.4935	25.4049	31.9519	47.1643	57.8316	766.066	117.458	144.037	248.985	358.07	78.5634	92.795	52.5408	8.86804	16.9989
PCHAS_0519300	43.3775	59.3976	17.3564	23.7521	5.07267	253.414	258.524	319.656	466.033	469.283	2104.76	848.369	366.612	1036.02	981.778	197.76	266.225	127.95	20.8403	49.2843
PCHAS_0519400	10.1463	11.6678	2.78611	3.90752	0.903242	2.33237	5.84794	9.2424	9.06782	16.2131	640.858	64.3029	256.638	428.191	440.135	69.3675	123.308	57.0655	8.09862	9.42017
PCHAS_0519500	10.994	18.3884	4.65496	6.7179	1.18842	34.0066	39.5442	48.268	76.1301	82.4451	723.972	141.815	121.449	355.488	339.186	62.7265	85.8468	48.3114	7.17853	15.649
PCHAS_0519600	40.1394	62.5938	12.3447	29.0618	8.07562	337.094	358.548	495.464	443.594	587.909	1103.92	1027.56	78.9887	301.571	359.225	92.2956	87.8833	49.5204	13.0853	29.8135
PCHAS_0519700	3.0784	4.305	5.72324	6.59596	6.35287	2.4303	10.4697	11.001	8.50369	6.2484	5.93918	8.61465	2.78636	0	2.38448	3.0345	1.82105	2.41682	2.79808	5.40865
PCHAS_0519800	76.3915	71.1559	72.5669	80.9572	71.1119	62.5215	55.8068	57.2825	60.8341	49.0825	22.2159	29.1356	10.2597	22.2132	19.6671	35.3825	26.8213	35.2572	52.9863	68.6858
PCHAS_0519900	111.525	109.498	127.676	149.746	124.759	101.039	109.703	102.087	107.786	86.1695	31.8329	66.9715	22.6033	34.4097	43.5224	53.0789	26.7754	38.8611	82.6872	114.808
PCHAS_0520000	77.4887	75.8956	62.4165	77.8079	57.9758	141.957	128.932	159.458	120.233	159.89	118.124	167.135	16.2537	61.5839	48.9614	32.1572	24.4324	22.1542	36.686	63.2411
PCHAS_0520100	137.701	165.076	165.315	157.645	151.578	116.952	155.343	193.874	85.7089	209.123	199.298	187.395	264.53	104.923	185.123	159.131	152.283	192.011	153.818	148.787
PCHAS_0520200	53.2098	60.5844	70.454	62.3161	70.7105	38.6025	50.7816	41.1401	34.252	36.5264	17.6182	34.1942	9.46035	23.3768	16.3326	27.6609	22.0434	30.6821	56.8829	59.7218
PCHAS_0520300	5.21018	7.11698	6.07567	4.58542	4.65341	3.56034	5.78214	7.0203	2.2246	2.66985	7.16433	7.01126	5.74025	24.1658	5.67647	10.5349	13.339	13.9095	3.29394	4.18188
PCHAS_0520400	555.002	516.071	471.316	510.811	415.702	723.657	670.615	687.466	710.974	787.202	711.666	773.061	421.946	528.299	566.777	489.776	444.236	441.342	378.269	509.111
PCHAS_0520500	13.9729	18.1188	19.7354	15.6925	20.3329	10.4542	13.4037	17.6048	6.18211	10.8792	16.1304	14.8889	9.49766	10.8609	10.9897	12.5287	8.21809	16.1777	16.427	16.8262
PCHAS_0520600	21.8753	26.1589	20.3217	21.162	22.9762	23.817	34.3173	40.2535	22.3222	45.1968	102.946	61.9776	27.4282	49.4871	39.5029	26.4412	22.839	20.4423	19.47	18.2993
PCHAS_0520700	51.8839	55.2619	53.3783	51.7049	48.0076	41.0047	52.6046	59.8959	36.5795	63.6487	43.8469	53.3564	28.2558	45.0378	33.2296	40.1171	39.4261	41.1553	43.0718	50.967
PCHAS_0520800	524.786	677.872	661.725	700.658	735.239	372.148	607.275	569.845	407.856	472.434	336.385	474.203	356.509	347.343	315.341	328.467	240.456	469.319	562.177	554.359
PCHAS_0520900	3.34105	5.20672	2.97074	2.23028	3.76741	2.27562	1.8673	1.7168	1.84843	0.877607	4.36949	3.58505	4.23965	10.5914	5.02362	5.32756	6.18115	5.81914	2.99428	2.86983
PCHAS_0521000	39.6056	42.3091	39.9112	46.3279	41.1574	35.7698	42.334	46.549	28.0807	35.3714	55.2344	39.7356	22.3454	21.344	24.7468	20.3988	23.1946	21.4992	33.1877	33.3392
PCHAS_0521100	2420.47	2732.56	2746.62	2619.42	2625.47	2528.74	3116.51	3265.62	3182.2	3257.21	4671.97	3902.83	5158.49	2392.68	3742.91	2825.54	2915.61	3509.98	3199.92	2707.02
PCHAS_0521200	35.1339	45.7276	44.6794	43.4534	48.5957	20.6517	27.7648	35.3696	16.4759	23.7983	16.3612	22.2873	9.19667	13.5761	13.2792	22.1256	16.8296	22.8743	32.2398	37.2184
PCHAS_0521300	64.8457	83.1267	80.5387	78.1702	84.1163	28.6034	60.5113	56.4004	44.6804	39.8344	32.2461	42.2458	10.2481	0	19.2941	36.2725	16.7444	45.7148	61.7475	64.9832
PCHAS_0521400	0.337381	4.54118	1.64993	0.883533	1.4041	0.878959	2.70467	2.61226	1.83066	2.76202	10.0581	2.30787	3.779	6.81822	4.31194	4.80146	5.48844	7.28403	1.20473	1.08674
PCHAS_0521421	3.68687	5.53318	1.99892	2.94366	1.76915	2.18655	1.92237	1.82099	4.29382	2.4093	2.90803	3.38321	4.70043	14.5384	6.89569	5.85032	9.06974	6.21264	3.08259	5.32963
PCHAS_0521441	4.55464	7.78488	6.7497	3.9759	3.44643	2.63688	10.8187	1.80849	3.29518	9.03935	1.53429	5.19272	3.779	0	5.17432	4.11554	19.7584	11.2382	8.67405	11.7368
PCHAS_0521461	1.34266	2.5521	1.02918	1.93996	0.980941	2.4928	3.05178	2.04058	3.21563	1.92962	2.15229	3.80051	0.115243	7.48531	1.73573	3.01213	2.86208	2.22765	1.12421	1.72994
PCHAS_0521500	34.7748	43.2131	41.7694	41.6537	42.7464	14.7979	31.6765	39.6861	9.69836	44.0078	64.109	43.6323	86.6734	37.4313	43.8328	41.579	36.6845	53.5847	37.3021	40.3307
PCHAS_0521600	21.2395	29.342	26.8613	23.4909	32.9235	12.3562	16.5311	17.1945	9.84638	16.1143	45.2211	16.927	81.6109	12.502	35.1397	28.0891	34.8875	41.8492	29.4535	27.8972
PCHAS_0521700	0.33185	0.850807	0.252916	0.12415	0.286978	0.164676	0.253365	0.0564712	0.205788	0.0705648	0.479091	0.810729	0.590007	1.91613	0.484714	0.578296	2.00514	1.40368	0.473992	0.244325
PCHAS_0521800	26.4772	34.9525	32.8594	33.6365	31.4591	18.3945	21.8782	19.4606	13.6943	16.0998	9.33667	17.3412	8.41335	0	7.1039	11.606	9.16437	14.7341	22.2081	26.5656
PCHAS_0521900	15.9665	18.0843	19.0531	16.6461	20.2943	5.7319	10.9719	7.72397	4.13632	8.26791	58.0834	12.162	42.577	45.0895	46.8521	32.8235	32.0611	30.7657	29.1791	19.9431
PCHAS_0522000	15.9694	26.8146	34.5984	26.2115	39.8254	5.85973	13.6235	10.4491	2.92905	7.03061	9.31938	10.7701	4.47881	0	4.21612	8.23108	5.12254	10.267	22.8095	23.1837
PCHAS_0522100	33.1247	41.6766	47.1797	38.5542	54.7716	18.1119	24.0415	22.2864	19.3051	18.2613	41.8442	30.422	6.10747	37.1903	21.429	27.0212	35.9243	34.0552	42.056	36.7515
PCHAS_0522200	8.29831	8.86477	5.58981	8.56094	4.75698	10.2636	21.055	35.3461	15.282	34.4356	75.6026	46.0141	5.94625	5.0819	15.6408	7.49829	7.36337	7.13538	3.05298	5.83193
PCHAS_0522300	0.89917	2.65998	0.707257	0.769821	0.44487	0.180197	0.246439	0.329565	0.225183	0.205908	1.43293	1.30114	1.54947	5.59125	2.18052	4.12491	3.71314	2.3893	0.74095	0.579263
PCHAS_0522400	5.56678	15.5698	4.04982	1.3253	3.44643	0	4.50778	4.82264	2.19679	0	23.5258	8.65453	39.0496	81.8186	12.0734	26.751	21.4049	46.8259	10.1197	3.91226
PCHAS_0522500	94.9856	141.725	24.2297	22.4281	46.5416	2.70449	27.7402	26.8955	10.139	9.27113	190.409	90.5397	207.36	534.968	175.131	282.811	352.104	438.003	87.8526	30.0943
PCHAS_0522600	13.913	15.4251	7.85723	13.0478	6.54431	10.123	10.7182	14.5575	12.6502	8.39568	9.88025	9.64591	11.2317	53.1948	12.1749	17.5834	21.41	16.4688	9.39913	8.23633
PCHAS_0522700	60.0666	79.7579	75.0375	75.6179	77.13	50.8695	68.0958	80.8153	45.6118	56.6499	57.0237	59.9921	64.6651	40.129	53.5761	50.9116	49.5305	84.108	65.9417	68.2246
PCHAS_0522800	52.3113	63.7284	58.1555	58.8629	55.6556	34.0755	59.351	71.275	19.8027	78.2977	69.8779	72.435	28.3489	39.4813	37.2226	49.0146	37.4611	57.2808	53.018	53.3416
PCHAS_0522900	1137.95	1110.42	659.584	1240.73	577.615	2817.66	2268.09	2620.59	2858.26	2964.95	1800.05	2624.22	559.057	1649.07	1027.06	701.01	729.001	402.682	331.96	638.626
PCHAS_0523000	2283.11	2227.02	2351.55	2321.65	2421.4	2172.3	2018.65	1796.78	2268.91	1786.45	1294.12	1476.77	2224.58	1574.89	2328.15	2564	2456.66	2364.14	2785.22	2474.9
PCHAS_0523100	21.812	30.5835	27.7	28.0443	27.3402	15.1535	22.9634	34.9367	10.8591	32.8337	31.433	30.9371	19.8152	25.9004	17.5137	17.7716	14.0329	21.6798	20.2418	25.309
PCHAS_0523200	124.06	114.549	108.381	127.797	117.507	174.034	150.689	180.332	145.929	160.771	117.483	151.331	52.906	87.6628	94.6162	76.4314	80.4448	57.2614	89.2188	106.749
PCHAS_0523300	147.861	170.63	164.893	162.493	172.527	108.982	143.604	161.33	91.3549	135.937	149.74	118.994	178.995	94.1647	126.778	130.939	119.763	170.154	140.426	160.092
PCHAS_0523400	18.5633	23.6266	17.5669	20.4872	16.6552	32.011	38.5032	41.6979	30.7934	35.7232	47.3016	44.4442	6.60087	16.0779	15.5908	9.16561	4.31406	8.66995	9.2801	13.8381
PCHAS_0523500	146.038	162.185	169.492	169.133	164.663	171.188	133.516	128.03	151.683	129.492	59.6668	91.4907	26.393	116.884	68.5803	90.8031	61.941	75.5161	143.535	143.76
PCHAS_0523600	92.3794	78.8384	72.073	101.756	68.5392	140.336	147.152	162.458	101.648	193.427	195.037	183.065	37.1495	114.407	80.6844	35.9238	46.8843	39.683	28.3009	59.3469
PCHAS_0523700	66.0991	97.4434	91.4653	94.6642	93.4679	70.3167	111.867	95.9607	70.8352	67.0265	88.9261	73.4752	71.9809	66.7907	63.3591	66.0726	56.4525	83.0762	72.5788	72.9223
PCHAS_0523800	67.8209	97.7372	96.1708	103.896	91.5694	63.901	67.1232	104.549	64.4605	64.0013	53.3081	71.2577	37.5141	53.7495	26.4382	31.8428	38.9399	53.0466	46.2194	77.674
PCHAS_0523900	16.6938	18.8724	8.06457	7.74526	6.76356	11.8717	12.6452	14.5619	17.4031	21.131	345.381	49.904	82.4508	217.829	189.053	58.6152	79.1191	49.9477	10.514	14.057
PCHAS_0524000	4.49841	6.59037	2.85701	2.94511	2.43135	5.58069	1.71725	2.29649	13.9479	11.4785	155.539	14.2868	35.9904	64.9354	84.3223	15.2427	15.6813	13.0815	5.04839	3.31196
PCHAS_0524100	254.994	202.364	28.6908	29.2505	64.8593	31.9012	70.4541	59.5274	77.5759	75.369	544.819	183.372	341.86	2046.58	549.296	744.61	1140.28	708.794	162.136	49.0364
PCHAS_0524200	33.5879	33.5923	34.9505	33.6317	32.8513	28.2652	28.3435	35.3646	21.6669	33.588	23.9601	31.2986	22.6481	18.9136	24.454	32.0646	28.9271	29.3143	29.1115	29.8778
PCHAS_0524300	5.46557	5.44942	6.11972	4.50602	5.97382	3.51584	7.21246	6.26943	3.0755	3.91705	8.18287	3.46181	11.0851	16.3637	3.10459	6.03612	6.58613	8.74084	2.31308	4.69471
PCHAS_0524400	5796.92	4926.42	5813.98	5428.04	5705.5	4848.32	4656.39	3035.84	4817.6	3439.81	4410.51	2691.85	8928.58	5304.48	7001.66	7084.8	7419.34	6804.28	6769.25	6199.22
PCHAS_0524500	4346.45	3773.24	1585.1	4678.41	875.836	16017.1	12474.3	15934.5	14153.4	16611.3	8560.75	15919.8	1309.23	3851.46	3599.31	1382.11	986.313	638.965	458.15	1590.56
PCHAS_0524600	455.292	403.978	370.051	509.903	304.662	659.964	543.379	632.461	542.867	582.706	443.817	423.045	307.871	270.418	361.033	232.749	223.259	206.986	233.513	361.828
PCHAS_0524700	3.13341	3.63422	0.796033	1.56301	0.790337	3.36898	2.39234	3.02156	2.59081	5.10823	108.569	10.2068	30.0834	72.3703	61.2782	11.7298	15.5348	9.02003	0.639365	1.92248
PCHAS_0524800	172.53	205.534	211.923	219.589	195.923	201.683	214.563	286.634	166.551	251.135	324.576	265.068	328.251	133.512	188.787	169.787	170.302	193.103	148.802	192.503
PCHAS_0524900	127.155	143.216	156.029	124.849	122.631	79.7953	116.41	121.482	59.642	110.254	256.492	133.95	407.162	160.333	240.895	175.668	223.396	228.146	146.181	143.109
PCHAS_0525000	22660.1	19544.4	24491.4	23131.4	26086.5	20393.3	18443.2	14634.8	19342.7	14355.8	6793.43	12092.3	10904.2	14885.7	12831.5	18543.2	15641	17066.4	24120.9	24442.1
PCHAS_0525100	35.0051	60.1713	50.4606	36.4602	66.4203	15.1995	24.5664	11.3722	18.4185	14.9998	87.0993	20.8616	235.651	64.3116	131.957	103.877	134.599	118.762	78.4074	50.2272
PCHAS_0525200	0.936687	1.0864	1.66573	0.846868	1.33318	0.271144	0.675423	0.796984	0.0484052	0.863104	2.90743	0.762793	0.666147	0.901417	1.14014	0.876611	0.725611	1.87097	0.60524	0.833312
PCHAS_0525300	0.682343	1.45784	1.82014	0	0.516319	0.395038	0.810388	0.54187	0.49366	0	4.82697	0.777935	1.13228	0	1.16277	1.23312	3.70007	2.24484	0.649742	1.46526
PCHAS_0525400	116.059	150.796	62.9972	119.571	45.2717	808.643	851.47	1156.9	1238.5	1304.68	1567.02	1810.91	167.955	400.002	504.784	145.111	100.987	75.199	42.7277	71.0002
PCHAS_0525411	0.391797	0.50225	0.174186	0.25651	0.148234	1.70121	1.74495	2.80024	1.70074	4.37388	2.77162	1.34006	0.487612	0	0.333827	0	0	0.483364	0	0
PCHAS_0525421	0	0.255242	0.531124	0.521429	0.602655	0.69164	0.354711	1.18589	0.432155	0.592744	0.804873	0.681012	0	0	0	0	0	0	0.284395	0.513083
PCHAS_0525431	4.30538	10.7478	3.42522	4.15392	0.857321	69.6608	71.4518	106.89	83.6091	119.063	266.325	228.635	12.9727	54.9528	72.9812	16.585	11.0588	9.78452	1.94195	6.71507
PCHAS_0525441	21.8	35.2648	15.6916	10.8743	22.3871	35.1584	46.2337	104.491	49.5685	63.3527	198.802	136.697	34.883	83.9166	29.1885	27.4369	40.53	46.1055	15.5688	13.3752
PCHAS_0525451	61.7801	55.2693	56.3351	27.8829	29.2425	20.5471	34.1889	26.3053	21.6826	23.8702	183.318	58.4462	349.434	148.761	259.388	264.036	318.187	348.336	88.9935	81.6323
PCHAS_0600100	78.2044	84.8496	92.6505	73.2252	80.4994	38.3201	39.3053	26.5419	48.8351	26.3377	105.965	48.565	279.483	105.952	206.601	184.755	220.327	190.268	119.814	106.954
PCHAS_0600200	43.8801	58.6239	21.2368	49.6987	14.2901	124.769	159.971	226.723	131.807	207.244	95.9866	126.652	17.5124	29.9336	30.2887	12.2964	11.4454	12.7915	7.93358	21.7082
PCHAS_0600300	22.7991	49.9508	6.45022	22.797	3.76402	200.871	275.821	402.188	300.053	445.797	361.108	404.784	45.3996	41.8867	96.4226	28.9352	22.9278	16.6208	6.80898	16.824
PCHAS_0600400	305.892	342.391	213.99	307.028	188.916	863.333	756.306	903.575	871.392	1040.36	497.223	878.915	138.563	204.547	238.594	161.573	151.847	127.644	157.418	213.725
PCHAS_0600500	29.2534	41.7725	11.03	25.4554	10.6475	210.307	245.399	349.788	272.455	399.33	339.04	378.688	41.9376	37.4171	101.909	27.8552	31.9267	21.9282	8.9914	16.6987
PCHAS_0600600	42.6064	82.5444	13.1994	40.6425	11.5246	556.842	552.268	791.143	824.737	947.554	775.035	884.905	98.3739	187.014	244.754	67.6777	57.707	44.9529	11.0147	37.508
PCHAS_0600700	101.982	90.6907	63.0156	120.01	43.6925	146.541	141.108	131.708	105.608	141.147	28.5478	48.9477	10.067	35.2088	16.7529	11.9755	12.1465	9.28842	11.0203	52.0298
PCHAS_0600800	102.841	87.8887	56.2946	118.015	39.2504	158.747	146.83	152.201	102.527	141.663	30.375	54.8373	10.2066	24.8605	20.2641	9.05919	10.2728	6.77885	7.1454	49.3985
PCHAS_0600900	126.338	131.902	98.6754	151.074	75.316	133.963	165.202	152.495	108.537	163.875	34.9308	57.1951	13.3435	12.9358	25.224	17.3514	19.5241	18.2615	20.3423	85.6676
PCHAS_0601000	56.1498	50.9724	35.7841	63.6144	28.6291	81.7014	76.847	83.3054	58.7902	79.9911	19.0934	33.2993	5.03866	19.4806	9.36306	6.40195	10.036	6.71915	7.02185	32.1674
PCHAS_0601100	55.4407	47.5199	34.3665	68.2398	23.43	68.5494	76.1387	68.9629	41.5299	76.8426	13.0566	22.7473	3.39228	11.0169	9.28963	6.13267	6.38511	4.5733	4.90543	30.1321
PCHAS_0601200	113.987	119.385	83.4978	135.409	68.4882	189.889	180.772	180.965	158.758	202.591	47.9404	75.3193	11.1076	23.5261	28.434	19.5915	17.9909	19.5083	21.6158	74.8703
PCHAS_0601300	8.22548	11.7783	3.19006	5.95812	1.45671	68.9996	80.7504	108.301	76.7293	130.771	93.2953	112.534	9.80143	24.7578	21.6218	7.1162	6.26346	5.50576	1.37485	4.17157
PCHAS_0601400	0.957863	3.19254	0	1.75592	0.289921	14.9728	14.6752	20.3099	25.7793	28.5153	22.8449	25.5541	1.90738	7.74309	6.85557	2.59655	3.73976	0.709036	0.547259	0.74049
PCHAS_0601500	19.7879	24.4918	23.6619	19.6561	20.3086	15.8015	13.3714	18.1526	12.8352	20.3132	27.5827	19.4484	57.7465	45.9655	35.6583	29.5949	30.3406	36.4786	20.142	21.3929
PCHAS_0601600	0.205164	0.460255	0.273636	0.201481	0.349301	0.71267	0.639618	0.733172	0.556619	0.839805	0.103668	1.05258	0.383006	2.07311	0	0.208558	0.500635	0.0632783	0.146521	0.264342
PCHAS_0601700	15.4633	15.1373	14.9993	11.7804	18.9341	4.88311	9.51643	4.35377	2.13577	3.97564	28.5548	3.84646	90.6259	22.7274	39.047	33.1529	41.1633	40.9293	28.3111	21.1914
PCHAS_0601800	51.6423	47.3285	33.953	19.8795	23.9336	11.3865	17.0066	11.0976	16.2263	9.24479	165.633	28.3239	354.997	251.034	237.157	184.108	303.486	192.838	58.977	47.5695
PCHAS_0601900	2.38151	4.88463	4.65861	3.43019	4.50514	1.65451	2.96983	1.13474	2.58446	1.41794	15.1624	4.88726	55.1289	0	15.4215	9.68362	7.74838	12.0462	7.4835	5.21634
PCHAS_0602000	8.28116	7.78488	9.16322	7.46987	6.54474	7.3513	5.57326	6.79554	6.79007	7.12191	4.83533	3.1471	10.5354	7.43806	7.83989	6.73452	7.18487	5.9029	7.62265	9.24715
PCHAS_0602100	65.0663	83.1314	80.8035	60.7744	57.6047	49.724	58.3436	30.486	58.3718	34.8661	249.431	60.0871	582.505	254.222	351.115	180.202	250.508	165.898	110.284	72.9356
PCHAS_0602200	87.5936	91.1612	72.0637	86.9081	59.4477	156.056	152.427	187.169	160.227	160.625	197.119	182.228	34.2779	109.497	96.5618	73.1311	116.787	56.5393	36.7599	63.9923
PCHAS_0602300	260.703	292.785	229.444	236.144	216.611	365.789	373.736	341.725	408.736	359.139	340.333	332.194	364.921	314.051	407.326	331.183	349.93	318.353	287.967	220.245
PCHAS_0602400	73.054	78.8363	88.2455	75.4832	83.1613	50.3961	67.2451	67.5985	37.3407	52.1722	50.0833	62.3565	101.306	51.8934	72.1999	85.2691	68.0891	101.374	71.5197	75.7638
PCHAS_0602500	14.8649	40.8997	4.51323	2.8484	8.6418	1.57426	3.87535	3.02315	0.393455	1.07933	42.6853	16.7407	42.415	109.906	27.8023	60.1974	59.57	54.7933	11.6517	7.24059
PCHAS_0602600	2.08382	1.14484	0.264694	0.779588	0.901028	0.517035	0.530328	1.41842	1.93834	0	1.20336	1.01818	0	24.0643	2.02915	4.43833	7.74838	4.40715	0.425199	1.15066
PCHAS_0602700	33.8017	43.6981	46.3564	34.8829	40.3168	20.896	29.5983	26.9567	16.7868	23.4512	13.027	13.7166	11.4083	23.1562	13.668	15.9186	22.368	22.9712	27.8224	38.3844
PCHAS_0602800	16.058	25.8248	5.19207	11.4689	5.08128	33.9752	44.211	70.2529	35.4866	67.7951	92.9425	83.8823	16.7148	70.8046	42.2902	30.8665	31.3474	23.7732	8.34043	6.01885
PCHAS_0602900	22.611	28.8978	28.5476	21.9144	26.3619	16.7289	21.7834	16.1116	11.7129	10.473	9.18157	12.3831	5.27104	11.0441	12.6884	19.7213	15.3355	21.3219	23.417	24.8202
PCHAS_0603000	272.903	267.665	240.822	265.796	234.868	323.587	326.23	349.195	351.079	385.567	291.515	379.517	93.3086	378.79	191.642	181.389	196.974	162.561	166.52	203.099
PCHAS_0603100	0.328618	0.716142	0.301934	0.286861	0.273526	0.0951255	0.117085	0.287062	0.166423	0.277181	0.675264	0.711844	0.327186	3.09919	0.746656	1.08382	1.24737	0.716241	0.469375	0.32461
PCHAS_0603200	244.787	232.86	247.152	249.763	238.872	229.072	205.412	159.976	222.388	153.311	63.8048	115.292	29.2997	108.13	63.8243	105.155	71.3739	98.3551	192.969	239.906
PCHAS_0603300	23.4515	21.7811	25.6776	23.7708	20.5808	16.6067	22.0977	18.5466	11.6383	20.7713	14.8206	13.479	5.46748	10.4449	12.8808	13.2223	12.6117	14.6655	18.64	20.0607
PCHAS_0603400	163.199	155.34	143.807	159.173	135.084	134.814	140.208	168.169	82.2659	182.034	99.57	143.844	106.42	118.496	140.242	182.739	177.939	177.314	168.945	158.424
PCHAS_0603500	39.3718	67.2331	70.016	60.875	71.0174	13.626	33.3878	30.978	14.5051	16.8677	70.1808	29.8146	154.053	29.3608	54.4666	50.2135	31.6701	88.0059	55.6135	48.2948
PCHAS_0603600	185.522	177.085	214.803	225.447	190.374	156.474	172.386	158.193	165.121	93.3735	79.5807	95.8655	41.5274	188.812	78.4678	97.6875	95.535	107.854	131.541	184.005
PCHAS_0603700	228.591	204.904	184.916	220.55	172.538	324.386	349.056	401.962	478.734	515.925	1391.28	766.171	195.367	416.812	579.915	180.152	156.576	98.2461	78.5575	176.421
PCHAS_0603800	11.874	18.3263	12.659	11.9122	12.7397	20.9309	29.0463	42.2216	23.3355	46.3399	100.236	74.3549	16.0277	31.0401	35.0324	21.6186	18.067	17.7829	9.1972	10.9604
PCHAS_0603900	216.16	200.883	244.688	226.876	234.904	155.631	166.441	109.774	113.373	118.207	79.3967	94.413	89.8503	171.647	145.46	185.343	164.423	185.47	191.072	201.358
PCHAS_0604000	190.944	195.371	227.932	211.028	233.297	138.943	181.005	173.893	143.214	125.16	84.3859	139.804	84.3007	118.008	100.501	137.712	75.9938	141.198	180.987	168.528
PCHAS_0604100	30.4749	34.2421	29.1967	34.6865	28.0851	40.1139	35.6241	58.4518	30.9098	51.0729	51.0808	61.5807	8.26512	20.8772	17.9813	13.0017	15.365	14.2014	14.2284	25.2894
PCHAS_0604200	18.7771	27.2699	24.5684	22.7972	21.8971	26.9364	37.5796	50.8217	23.3436	48.8231	69.6585	61.1745	8.13483	24.0172	16.4039	8.61766	6.76657	10.6298	10.3545	16.2309
PCHAS_0604300	15.0705	21.3226	20.6461	14.6173	20.611	8.53108	11.5346	13.0318	11.1455	9.30522	44.3364	9.54544	116.149	22.5603	62.0158	44.938	48.6695	52.748	28.382	18.8421
PCHAS_0604400	134.297	152.139	160.141	154.492	130.242	135.611	105.096	109.129	124.275	97.1085	55.059	81.8966	107.108	56.1042	114.722	121.82	109.518	130.577	117.967	131.452
PCHAS_0604500	1314.26	1241.98	1361.18	1341.23	1332.09	1041.95	1122.83	901.945	868.937	894.791	587.641	738.386	1017.93	879.669	1038.45	1201.59	1104.98	1223.21	1334.2	1384.67
PCHAS_0604600	1605.2	1218.23	1290.1	1357.72	1187.93	1306.32	1177.63	1072.87	1432.07	1074.34	962.87	1004.86	1438.06	2968.69	1624.32	2047.76	2516.52	1746.48	1355.61	1371.93
PCHAS_0604700	91.2814	78.3323	71.4378	71.1217	71.0693	72.7189	61.8211	46.2794	58.1262	73.55	42.6932	38.7035	20.6554	121.966	51.4219	64.9284	82.2243	45.6044	67.8839	67.5532
PCHAS_0604800	39.4367	41.6281	35.0657	45.2384	31.3611	35.4685	42.2251	54.7133	21.5077	52.4223	29.434	39.8471	8.1663	43.2998	15.2891	11.8883	15.6847	11.4819	11.6674	27.6058
PCHAS_0604900	7.47428	8.53343	7.68427	8.56347	10.0742	4.86808	8.11401	11.1292	6.33689	8.51785	6.72726	8.38823	1.45346	9.44061	1.99012	2.21606	2.65978	1.58488	2.0017	4.2132
PCHAS_0605000	1703.77	1815.03	1904.58	2032.62	1874.12	1809.35	1854.54	1791.52	1986.87	1750.96	1032.71	1616.79	1205.55	1196.98	1321.05	1359.65	1146.47	1343.04	1862.78	1861.46
PCHAS_0605100	66.6111	58.9965	11.3841	14.2725	24.3509	6.61098	12.0208	13.1901	13.1432	9.0136	76.5833	36.0975	106.802	412.59	116.754	192.058	272.452	230.528	46.4593	14.2669
PCHAS_0605200	25.5809	24.5277	26.8139	27.7768	29.7432	23.8403	35.9388	32.4537	20.3128	28.1706	17.0243	24.8966	5.17671	16.812	8.50574	10.1479	6.76657	11.2895	13.6646	23.0448
PCHAS_0605300	33.171	34.8902	39.0234	34.5246	34.8827	25.1131	23.0314	18.4395	16.9836	15.9518	9.28309	12.2182	8.46834	41.2531	18.2623	23.7479	18.8175	31.8993	40.8191	33.0953
PCHAS_0605400	250.442	255.421	234.733	241.84	221.787	263.252	253.926	223.595	259.257	197.969	107.02	149.344	43.7239	162.285	105.197	90.4738	86.545	85.4476	157.71	221.156
PCHAS_0605450	16.4591	21.0992	10.5977	22.2948	11.5955	27.601	19.2107	15.5496	13.5503	21.12	133.067	38.824	42.3813	68.8194	76.4059	30.7704	44.3179	30.1086	12.9705	15.3565
PCHAS_0605500	86.2013	80.57	72.0515	64.6537	68.3001	72.6143	74.3168	70.1408	64.5014	61.9567	72.4706	70.3937	58.1207	119.371	78.9517	88.1901	102.696	89.8375	74.6127	78.4829
PCHAS_0605600	30.261	36.0117	38.0187	32.5915	47.0465	18.8348	20.239	12.6717	18.8296	12.1447	5.74053	14.4831	3.59904	12.5233	10.7358	22.3975	9.40875	21.661	43.5178	35.2635
PCHAS_0605700	2.67457	5.2437	4.05681	4.1201	5.11905	3.27902	6.16609	7.49633	3.75617	7.0254	52.4679	12.9145	6.6573	6.35896	17.6946	4.47805	4.095	5.62882	2.6966	3.64874
PCHAS_0605800	32.0007	58.9693	48.9858	49.5202	47.6034	39.1584	70.2891	100.279	42.2257	77.4028	115.761	122.511	13.5772	44.0939	32.843	21.9331	15.3808	28.2638	26.4896	38.1855
PCHAS_0605900	41.9047	51.2455	52.8738	48.6862	45.7008	35.3509	45.621	46.1135	25.6974	42.3751	28.0978	39.5852	24.3379	45.7037	27.2035	26.2349	19.0442	29.9522	39.2375	40.4509
PCHAS_0606000	95.4851	105.967	91.888	90.2347	82.3676	112.962	118.782	142.729	97.1087	168.848	247.692	179.716	136.492	163.196	154.532	96.362	104.561	90.3366	81.3631	89.7042
PCHAS_0606100	780.98	796.708	428.206	929.804	379.352	2020.06	1588.93	2025.73	1624.15	2213.13	800.628	1555.61	235.699	634.157	454.208	271.2	258.24	160.091	174.272	387.182
PCHAS_0606200	11.0416	12.503	6.38153	15.1807	8.21574	26.5286	19.6703	39.2387	15.5772	27.6659	11.3444	16.9943	10.0773	44.6283	5.01753	10.2265	11.376	10.8977	4.2056	7.82451
PCHAS_0606300	101.429	127.938	127.25	121.977	122.023	73.2723	110.086	127.07	52.5403	126.885	147.547	124.241	139.36	91.8334	102.387	92.842	85.4219	121.847	107.574	107.664
PCHAS_0606400	54.24	50.8811	47.9127	50.2463	46.7579	53.3539	60.5052	72.2188	48.3	82.6973	100.766	99.8666	85.1694	55.3198	76.1032	62.8667	64.8167	72.1072	52.9276	56.2346
PCHAS_0606500	31.4666	63.9748	62.1952	59.048	70.8244	17.4051	44.2745	50.3751	16.9653	34.9044	21.6725	37.7029	15.4652	16.2017	7.51387	12.7677	9.12929	16.0723	40.3644	40.8011
PCHAS_0606600	251.081	292.229	302.902	277.105	330.588	142.998	184.457	189.793	92.4938	173.336	123.076	139.223	243.626	173.044	194.739	230.238	212.156	267.507	286.187	282.854
PCHAS_0606700	1.67234	1.66385	1.55357	1.40537	1.45431	0.650278	0.844862	1.15957	0.487573	2.22919	30.6732	5.89063	7.64187	15.1329	13.5685	2.87563	4.0605	3.41812	0.962595	1.64016
PCHAS_0606800	4.83251	5.57538	5.2995	3.79661	7.43527	3.63707	4.01755	3.45388	3.84584	2.87725	8.62783	3.30571	2.00477	0	3.843	2.61997	1.57228	5.36573	4.8317	2.69811
PCHAS_0606900	5.20796	8.70285	1.73652	0.852413	1.4778	0.80762	1.98812	0.997023	1.21109	1.93799	8.08262	3.817	5.55565	30.0712	10.3011	14.1176	23.6011	16.1775	3.85218	2.39648
PCHAS_0607000	62.1166	76.5142	81.2278	69.919	76.6749	24.0333	40.4928	32.0361	19.9594	28.5385	42.3464	27.2989	87.4568	40.3249	65.5661	65.5546	69.2955	86.8554	70.7555	69.9176
PCHAS_0607100	187.068	186.074	186.662	195.053	174.349	121.193	142.764	149.786	80.3766	160.581	137.063	150.691	186.134	163.637	183.435	210.619	188.673	214.187	185.387	195.153
PCHAS_0607200	20.8754	25.4862	24.5882	23.7844	27.2159	11.9287	15.9382	13.0254	8.4341	11.1647	6.30154	7.72726	3.3741	10.9579	4.92793	6.98172	6.46852	8.0273	16.7802	16.8832
PCHAS_0607300	1.58341	4.4178	1.40791	1.2196	1.90294	0.323543	0.995584	1.3314	0	0.693202	3.0121	2.23	2.78208	33.882	5.8727	5.8072	6.66694	5.28587	2.1286	1.68011
PCHAS_0607400	4.55398	8.87483	1.89588	2.34383	1.83252	5.62351	12.4272	20.3818	5.08489	29.9353	83.3716	42.0459	11.4664	30.8549	21.3971	12.88	11.3908	9.87262	2.63192	2.67939
PCHAS_0607500	72.8123	88.5729	96.7686	86.0092	87.5675	39.015	61.5451	57.0228	29.5894	51.5381	62.624	44.2441	118.961	53.2239	70.751	80.106	74.0939	90.8805	77.5575	84.4329
PCHAS_0607600	140.059	88.3689	16.0533	15.0439	27.3231	9.50226	25.3411	14.3376	18.9992	7.3292	104.497	54.2662	134.818	818.186	231.213	377.443	655.053	347.609	78.9261	21.8522
PCHAS_0607700	1.93814	1.44931	0.430832	0.211484	0.488856	0	0.287731	0.384785	0	0.721225	0.489666	1.10483	1.60808	13.0562	1.65138	3.50259	6.83136	4.78222	0.461386	1.24859
PCHAS_0607800	78.1754	95.053	103.222	103.681	89.6199	80.4175	105.198	123.097	93.94	94.3888	74.5952	91.8049	14.1973	27.1222	34.3049	47.2946	44.7566	43.0488	71.4052	89.4847
PCHAS_0607900	27.6242	34.9818	42.6611	27.5311	37.659	10.8777	22.9125	21.582	14.3216	15.3153	24.3	15.6833	49.8299	13.5611	38.3072	48.5073	49.4869	60.02	40.8942	33.2866
PCHAS_0608000	176.293	106.596	13.9724	21.4334	45.0854	10.2348	28.8693	27.8829	19.5402	19.7355	133.661	71.1024	192.719	1369.52	297.907	539.346	821.757	495.37	106.847	23.4103
PCHAS_0608100	9.33089	8.2733	5.6694	5.39623	5.64844	3.37628	5.54094	3.70497	1.85644	3.58796	4.872	6.6488	6.38704	18.857	11.2629	16.2303	14.9263	13.6221	9.88464	6.71245
PCHAS_0608200	10.0202	11.8719	13.3644	7.55421	10.4542	4.219	6.22074	6.87226	3.95422	7.0055	5.52344	5.71199	8.31379	6.1364	4.39818	10.9062	6.91543	10.6763	11.0594	8.41135
PCHAS_0608300	38.4769	46.947	45.7537	43.7045	47.7063	38.6474	56.1581	61.8476	47.2896	49.6819	43.5691	38.0535	20.7701	37.4742	21.3293	16.3365	13.5745	23.4487	28.4721	41.2131
PCHAS_0608400	5.21807	6.57825	6.02394	4.54874	6.55528	1.65235	2.51657	1.99179	1.095	2.14559	5.50639	1.67626	18.9443	3.49569	9.48155	9.96404	9.23902	11.6481	8.15316	6.33316
PCHAS_0608500	0.163591	0.186408	0.177783	0.142804	0.220066	0.12628	0.129526	0.10826	0.0789029	0.108223	0.146954	0.0621696	0	0	0.0619494	0.0246366	0	0.0224249	0.181737	0.0468393
PCHAS_0608600	184.477	200.253	239.763	242.555	239.01	149.257	170.105	178.802	126.833	161.458	107.304	163.293	115.034	92.6249	112.599	143.397	127.995	154.555	196.394	188.477
PCHAS_0608700	14.0515	17.8576	11.2016	19.1922	11.1826	20.7584	19.9973	25.7806	11.4806	26.505	10.7727	17.263	2.41213	6.52808	6.05506	3.7215	3.94117	3.43722	3.80643	8.74015
PCHAS_0608800	0.709056	1.12282	0.778811	0.873824	0.978383	0.651975	0.594433	1.19241	0.452635	1.55209	1.13807	2.13986	0.72673	3.37165	1.13721	1.01758	3.12117	0.977684	0.65532	0.806097
PCHAS_0608900	438.684	462.995	498.767	525.237	496.407	452.433	499.652	442.604	551.509	454.346	192.19	308.83	87.5136	96.8905	130.72	167.871	140.388	170.545	332.125	412.846
PCHAS_0609000	4.79436	10.2433	12.4014	7.03867	14.1815	2.01866	4.91758	3.98041	1.57664	1.51377	3.3769	3.47837	1.80813	0	2.47575	3.34757	3.30882	4.66019	3.73524	6.55162
PCHAS_0609100	70.1476	82.4562	88.6552	82.8447	78.3067	38.3155	57.6261	58.3146	28.9169	49.4397	86.5464	41.7537	169.978	57.607	91.0259	87.8541	89.7192	122.932	81.9609	84.6325
PCHAS_0609200	112.98	135.135	102.081	140.821	81.9381	149.19	187.101	226.081	111.805	241.157	221.895	228.375	31.2707	91.3651	67.5588	40.7135	38.0458	38.6138	36.6334	84.8542
PCHAS_0609300	145.748	129.229	136.794	135.181	118.251	129.383	116.842	96.4528	116.869	97.0224	54.4161	77.5446	25.1933	65.4549	57.9524	72.9822	77.7163	79.4168	99.4625	133.017
PCHAS_0609400	634.585	561.368	645.494	641.98	634.902	567.05	488.33	390.899	654.199	407.186	203.821	283.932	312.027	202.67	400.654	528.601	489.428	444.03	630.261	689.849
PCHAS_0609500	28.5061	33.3478	22.6642	26.8495	19.7506	48.2953	62.077	105.567	39.0962	119.679	165.115	143.108	53.1073	58.3157	76.1434	42.548	43.2437	41.1016	23.2932	24.8424
PCHAS_0609600	32.3384	43.0217	32.6827	34.3429	34.0731	30.6955	37.8486	48.3757	24.4843	38.6201	91.4873	43.0851	33.2271	53.1948	45.1752	23.572	25.3862	26.9068	20.8124	25.9202
PCHAS_0609700	0.316955	0.650094	0.11273	0.166008	0.335769	0	0.33879	0.377555	0.137586	0.28307	1.02499	0.216815	0.946722	5.12434	0.864188	1.37471	0.618738	1.17309	0.0905433	0.490053
PCHAS_0609800	0.553335	0.709328	0.369004	0.362269	0.942077	0	0.739318	0.164783	0.600489	0.823631	1.11839	0.47314	0.688655	0	0.942929	0.93748	0.450077	1.02398	0.59276	0.534705
PCHAS_0609900	88.3324	101.439	93.5023	95.3527	81.7595	132.415	133.477	151.882	99.854	150.656	137.887	182.532	28.7924	74.3806	50.6233	41.6899	29.0816	32.7579	57.076	86.0358
PCHAS_0610000	26.3899	47.2799	50.605	49.5426	57.0195	29.268	43.6146	56.4325	26.2234	37.8612	60.0863	39.1493	11.8712	12.8511	15.1708	16.8069	14.4826	19.613	25.8859	39.737
PCHAS_0610100	21.4697	24.5735	27.067	23.996	27.2117	22.6399	23.7683	32.1509	19.9708	25.7941	29.9109	28.5862	9.54292	3.09919	15.0264	14.0302	9.97898	16.7438	19.8233	24.3034
PCHAS_0610200	38.2232	34.3451	40.3394	37.888	37.708	43.7412	37.5472	47.8718	33.7272	49.4506	31.9493	38.4872	9.78093	28.8772	16.1317	15.978	12.7848	14.5436	24.2363	37.0514
PCHAS_0610300	13.7129	15.3186	18.6379	14.3645	19.7151	9.52679	15.0066	14.2346	5.95259	15.4544	35.2391	15.4106	24.8682	23.7538	19.362	18.8518	19.7584	27.7935	11.7519	11.6106
PCHAS_0610400	73.8388	88.1241	13.9524	10.0509	21.3314	3.7754	13.9167	11.2474	7.22434	9.30224	81.2795	52.2757	119.88	573.829	134.509	247.945	319.361	223.424	48.8037	20.1302
PCHAS_0610500	16.6706	23.2783	32.2927	25.3366	35.5906	6.20442	15.9098	7.80133	1.93834	6.64658	8.72438	9.16362	9.63274	24.0643	10.1457	16.1394	12.5911	27.5447	29.7639	16.8764
PCHAS_0610600	0.225757	0.434101	0.200734	0.443409	0.427067	0.392101	0.603272	0.672301	0.48999	0.504053	1.59703	0.772151	1.40483	0	0.577062	1.83593	0.734512	1.67111	0.322455	0.727185
PCHAS_0610700	59.4847	59.7466	65.9681	63.0395	66.4926	42.5713	45.2299	37.39	32.7136	35.504	15.8235	27.0272	21.3081	47.3168	33.0409	38.9736	38.5646	45.314	56.2246	60.9935
PCHAS_0610800	32.9706	37.755	40.2085	37.8819	42.8955	21.9551	25.5377	20.1806	22.345	16.876	8.69211	19.612	12.9751	36.8711	17.0997	26.6715	20.776	27.975	37.2277	40.4658
PCHAS_0610900	40.0316	48.9662	51.5749	41.5771	47.8159	13.1048	23.0562	14.418	10.0078	12.0889	56.0763	14.1579	126.38	23.2961	71.878	57.5962	69.0435	81.3858	61.5192	47.5952
PCHAS_0611000	33.2213	38.1578	38.4009	30.276	33.1823	19.1563	24.6202	21.686	17.8819	18.593	33.8416	21.8162	32.0843	53.7103	37.8167	45.5681	49.7202	51.4778	34.924	33.7293
PCHAS_0611050	2.98665	0	1.32781	1.95536	1.12998	2.59365	5.32066	3.55768	0	2.22279	10.564	0	0	0	0	2.02404	4.85862	3.68466	2.13296	5.77218
PCHAS_0611100	17.2936	22.6844	25.1512	19.4845	23.6356	13.7374	20.5388	21.5582	15.7121	14.3672	12.0575	19.2578	3.67055	5.41845	7.3103	9.63018	8.72335	13.3966	18.1906	16.7545
PCHAS_0611200	16.4951	23.3262	3.28852	2.22767	5.56914	0.642358	2.70138	2.81957	0.963269	2.25709	20.0336	12.7762	24.0272	118.094	28.7392	48.5744	76.29	53.4762	11.252	5.71828
PCHAS_0611300	0.521275	0.334115	0.231749	0	0	0	0.464321	0	0	0.387955	1.31699	0.891454	0	0	0	1.0598	0.847999	0.321551	0.372277	0.335816
PCHAS_0611400	12.8641	13.653	14.4093	15.3676	13.2737	11.9693	13.4676	18.3585	6.61756	20.8266	16.8835	16.2853	5.09411	5.06443	8.32732	8.88775	7.33805	10.0479	8.88882	12.8615
PCHAS_0611500	4.27751	9.03602	3.53555	5.04876	3.41908	12.5566	16.8505	26.6968	12.2916	23.8538	33.6082	36.6787	4.94869	4.87016	9.65053	4.4095	6.46852	4.23663	1.63499	3.41546
PCHAS_0611600	479.903	412.662	413.103	480.017	391.156	583.543	511.908	521.374	609.207	567.715	451.056	558.956	369.297	419.071	467.372	469.439	459.423	418.464	386.101	473.606
PCHAS_0611700	47.1826	56.5818	54.8096	54.2077	58.1603	33.5723	40.4006	46.776	24.7758	33.5294	23.9949	32.7961	13.2596	30.7589	18.4149	22.0733	21.2935	26.2882	41.9572	46.8686
PCHAS_0611800	48.9228	52.2375	56.5856	51.5586	49.4588	22.8502	38.9937	33.7289	12.2811	33.3777	27.6031	29.7068	21.0395	51.7641	29.7603	38.2518	35.5318	47.8314	44.2683	50.7033
PCHAS_0611900	109.375	121.85	50.5827	110.843	37.9002	392.44	325.843	481.978	392.991	542.004	499.058	582.351	71.4972	177.867	195.52	84.4797	77.3154	48.0722	22.0565	56.4932
PCHAS_0612000	1406.88	1317.32	1272.82	1449.51	1314.15	1777.57	1576.49	1715.82	1692.82	1751.45	1382.87	1794.03	855.585	1299.47	1160	1103.66	989.856	911.79	1045.99	1321.22
PCHAS_0612100	256.887	269.742	266.459	267.622	249.72	163.131	204.517	176.836	129.833	194.571	196.355	152.706	461.3	253.978	304.753	306.27	305.589	328.859	272.385	276.708
PCHAS_0612200	325.698	377.625	327.746	350.908	321.438	375.722	410.141	532.65	401.979	463.211	527.307	579.724	299.312	354.14	327.965	280.921	263.445	300.059	242.528	318.82
PCHAS_0612300	46.7433	51.6838	48.5082	49.4925	45.6664	49.674	49.3799	48.0263	38.0108	49.5101	52.968	54.2973	44.8462	56.0169	45.7316	49.1815	54.52	55.1808	44.8099	49.3496
PCHAS_0612400	1.00794	4.19931	0.448113	0.32995	0.381348	0.437656	1.34672	1.20066	0.546918	0.375077	6.87565	4.30931	3.76332	10.1849	6.01166	9.56308	10.658	9.01545	1.07976	2.27268
PCHAS_0612500	45.5219	66.7814	66.2975	55.7525	70.599	35.1016	49.6366	59.6013	27.2558	47.6063	53.7373	51.3399	37.1184	31.7229	31.4305	36.4348	28.4087	56.524	50.587	51.3207
PCHAS_0612600	881.778	854.505	862.818	897.524	815.034	655.931	742.289	674.205	497.456	661.043	469.889	550.306	735.882	525.564	708.091	743.315	694.565	759.968	843.934	864.01
PCHAS_0612700	140.825	146.019	154.112	162.904	145.309	100.344	118.713	97.3652	106.871	82.5757	65.3524	68.4877	30.232	53.0715	59.295	73.8572	73.6934	89.5008	119.092	140.841
PCHAS_0612800	139.231	175.015	132.847	184.839	146.434	206.924	271.786	386.092	175.417	386.209	259.413	357.047	44.8831	70.279	76.1608	43.2066	27.448	36.0704	65.9522	114.339
PCHAS_0612900	26.6664	33.3828	30.8425	32.7347	37.4398	20.9865	22.4539	20.1012	16.5042	18.2958	9.78997	13.8947	3.11135	12.6307	7.98781	11.1536	8.81163	10.5378	20.6808	23.8896
PCHAS_0613000	74.8789	99.3895	78.6372	66.7797	89.8972	52.2255	92.4315	86.3861	48.6279	62.7489	117.976	82.6801	81.4502	142.984	74.8519	99.4921	98.7919	152.025	89.688	78.6249
PCHAS_0613100	16.7618	22.7246	23.0192	18.6155	25.566	10.0598	13.9142	14.8443	7.42844	10.7114	7.6271	7.50393	5.89786	17.7353	7.17825	12.6083	9.13682	15.5906	20.8077	17.8652
PCHAS_0613200	9.63481	12.7253	8.04771	7.26366	10.8253	7.09929	9.36232	10.0858	8.87164	12.6029	117.727	19.972	25.4356	35.4023	58.7087	17.8076	20.8983	15.4886	10.0085	11.2854
PCHAS_0613300	138.358	177.822	61.2567	79.0491	60.3668	241.299	294.324	365.707	349.724	526.265	998.735	797.768	142.96	769.944	434.936	312.645	398.197	241.728	72.2156	76.7688
PCHAS_0613400	10.4829	15.7551	2.57131	10.4131	3.82937	72.2002	75.3444	110.662	107.486	124.291	293.707	185.454	20.6945	29.2209	67.143	14.2084	19.9936	12.041	4.1305	6.98617
PCHAS_0613500	68.71	89.4149	95.4471	81.487	89.279	62.2805	92.7316	124.7	54.9825	95.3867	244.083	138.077	264.89	65.4549	145.275	107.082	106.507	132.147	94.1754	88.2307
PCHAS_0613600	29.4533	36.5889	38.0683	39.3614	50.5477	26.3688	29.7514	29.6592	30.3157	25.7622	24.5486	29.0792	37.79	0	25.3542	24.2817	30.6255	36.3369	39.4669	46.1646
PCHAS_0613700	27.6039	43.428	44.1798	46.0021	52.7883	15.2547	30.3996	32.2838	13.6165	21.291	15.9769	19.7409	8.74479	30.4284	10.6908	12.5847	8.98108	28.4825	31.9004	31.0394
PCHAS_0613800	23.5929	35.1782	31.7521	32.1058	36.1363	18.8172	22.7294	21.0566	15.3156	23.1289	9.65233	15.8463	6.74187	5.76188	8.62387	16.0371	12.7548	18.0269	22.9068	27.0001
PCHAS_0613900	17.474	17.9851	10.3131	17.6412	7.85675	29.1178	35.551	59.3679	24.0749	63.856	121.259	74.6642	14.8765	45.0378	38.2356	15.0342	15.9847	10.4978	4.41299	8.54888
PCHAS_0614000	26.7963	37.991	33.2143	28.2222	35.098	19.6027	28.0196	35.1289	14.2238	31.757	33.9236	41.8406	15.406	26.488	18.9849	22.7983	20.1374	23.7162	22.7772	26.2693
PCHAS_0614100	105.464	126.367	20.3946	15.7993	34.2382	5.63457	18.048	18.373	10.1295	13.6395	139.941	68.9118	157.96	733.837	184.472	298.695	443.499	360.143	61.9459	26.7661
PCHAS_0614200	47.0646	63.836	62.6372	67.1927	58.1298	44.8269	56.7981	67.2758	34.2699	54.2361	38.3572	55.0428	16.6276	24.5456	17.0753	15.2275	9.87919	23.9749	33.3951	40.2962
PCHAS_0614300	30.1749	32.2886	30.7034	28.9307	38.8351	17.2137	19.1183	16.3178	12.0572	16.3498	11.9936	13.1707	7.85654	25.5152	16.4589	26.182	18.0742	27.4141	44.5424	34.5677
PCHAS_0614400	24.2219	22.7307	22.3616	22.7628	19.3807	21.9404	23.5368	20.5698	20.3748	16.0431	14.6402	17.4412	6.92335	0	12.2446	14.4515	11.6891	16.0138	15.0637	23.4437
PCHAS_0614500	11.2068	14.1073	16.114	12.0301	15.2029	5.78667	7.19447	6.61459	3.28696	7.51401	6.12185	4.66179	6.28262	16.3229	8.86044	11.4263	9.85455	15.4452	11.6087	11.8376
PCHAS_0614521	0	3.2437	0	0	0	0	0	0	0	0	2.55715	17.3091	0	0	0	0	0	0	3.61419	0
PCHAS_0614541	2.53036	6.4874	2.2499	3.31325	1.91468	8.78959	0	0	0	0	5.11429	0	0	0	0	0	8.23266	6.24346	0	0
PCHAS_0614600	3.12573	4.57934	1.9852	1.75407	1.35154	0	0.795491	1.06382	2.90751	1.99397	7.22018	0	10.0032	72.1929	9.89209	21.1829	33.4149	17.6286	1.91339	1.15066
PCHAS_0614700	10.2357	15.1303	10.6253	11.3505	12.2293	13.7798	17.0133	25.6689	12.0115	28.7947	44.8408	42.7143	3.9009	13.8564	14.5215	6.90348	5.41762	5.25659	7.83463	8.77102
PCHAS_0614800	5.74034	5.83177	6.07491	6.71495	5.9459	3.64896	4.98054	4.92642	2.29792	5.24484	2.8922	4.13041	0.535298	2.00591	1.01485	0.964141	1.34557	0.918406	2.33923	4.62522
PCHAS_0614900	16.2014	21.0439	10.0808	18.7321	9.14719	47.0849	56.5146	87.421	44.3239	100.189	121.876	116.821	14.1545	36.139	29.2541	13.6215	12.6835	9.66302	5.56815	8.29453
PCHAS_0615000	79.7657	87.0003	33.6004	85.8744	21.5357	365.526	316.421	477.691	351.004	508.641	417.961	547.921	42.4101	157.738	132.683	46.1869	37.1631	25.6001	16.0429	36.6697
PCHAS_0615100	83.751	89.2356	88.1692	80.2301	91.6305	63.5999	61.3597	71.044	57.0509	60.9819	29.1286	55.8023	12.6343	43.9623	22.5508	37.347	24.7717	39.3617	61.8835	80.1137
PCHAS_0615200	42.741	52.8864	50.1825	41.0555	52.3208	31.5279	39.9821	34.9903	22.5648	28.7392	19.8457	29.3501	26.6994	26.68	29.5274	32.2086	27.9195	33.1853	36.7704	40.6109
PCHAS_0615300	12.8558	16.1662	19.3782	16.1922	16.7689	10.4199	13.5234	12.1052	6.11203	10.2057	8.78504	7.53781	11.5808	9.89742	7.9284	11.7824	13.5441	10.8757	11.8918	17.195
PCHAS_0615400	242.982	222.939	244.752	261.657	235.144	201.329	251.096	237.711	133.44	245.63	295.592	242.561	283.595	226.66	229.232	190.112	239.86	240.12	210.697	240.287
PCHAS_0615500	54.5046	50.5824	54.8035	48.0273	47.7814	21.6198	26.4816	16.9872	18.3612	12.772	55.5702	18.8075	123.635	56.174	92.4685	75.8406	96.1378	82.4509	63.5234	57.3797
PCHAS_0615600	29.4252	35.3129	38.4106	33.4467	32.4036	14.5708	16.0607	10.7391	11.9578	14.1648	96.676	22.2698	213.806	80.9751	132.932	70.2611	92.07	78.7834	53.4751	36.2993
PCHAS_0615700	441.8	481.365	520.739	514.216	487.67	441.897	554.683	653.016	367.962	638.028	665.37	669.428	257.917	337.502	335.9	297.348	259.329	346.668	372.261	458.712
PCHAS_0615800	175.554	157.04	166.648	185.542	148.949	176.398	164.146	179.186	229.526	152.734	78.3016	131.31	38.2243	84.64	66.612	102.652	79.4877	87.4084	137.09	152.443
PCHAS_0615900	40.0139	44.3672	52.0527	48.014	56.3696	22.123	29.3388	17.0121	21.5025	10.9162	8.84166	9.68134	6.08483	15.601	11.8396	12.3815	8.79081	14.7621	34.5492	42.6038
PCHAS_0616000	21.5341	27.1667	29.9874	25.5114	33.1064	17.8101	27.1989	36.1019	18.7943	32.3924	31.8948	31.1758	12.1949	4.60518	17.4743	18.0682	13.3452	20.1009	25.8757	24.6626
PCHAS_0616100	16.6428	23.3773	30.9082	22.5649	28.3574	3.38258	8.93672	6.25678	4.73943	5.09507	7.27631	6.45936	14.2493	11.9269	11.7667	14.4784	12.481	21.1877	23.0971	22.9641
PCHAS_0616200	547.297	521.919	540.305	539.655	523.129	380.096	402.732	327.293	295.763	302.047	226.401	248.87	389.421	351.72	448.967	516.952	466.852	515.77	569.631	560.836
PCHAS_0616300	66.2661	91.3363	73.8568	79.518	71.0936	60.9127	83.853	80.9148	62.4983	86.8217	100.358	71.972	63.8639	126.831	72.0316	60.7949	64.2598	74.2383	47.7205	60.1703
PCHAS_0616400	90.0806	93.9375	99.1755	86.9396	101.861	67.5041	71.7639	57.6305	62.3888	50.3191	43.5738	48.4654	106.316	24.5456	85.5488	114.961	94.1816	117.627	122.593	103.023
PCHAS_0616500	33.7464	42.2002	39.4289	40.8415	41.2321	25.3245	36.0176	36.2593	25.2848	32.3313	42.079	28.7913	42.4669	24.3026	35.4774	37.9974	35.9466	44.4151	36.1777	42.5119
PCHAS_0616600	7.11235	9.81877	4.05387	6.20861	3.58788	18.371	28.265	38.0163	24.5407	48.5899	118.136	72.9787	18.1573	29.4842	27.6586	16.0667	12.4602	13.4994	9.11687	9.16384
PCHAS_0616700	48.4887	59.3421	49.6722	54.2448	50.702	62.1404	62.6198	91.9666	58.581	85.4885	102.286	98.7555	55.0738	57.0828	59.8992	54.0231	53.608	48.9797	47.0685	54.3874
PCHAS_0616800	26.604	31.3323	41.3758	25.6033	39.8349	7.51061	14.4026	4.59121	8.56951	4.4777	16.6254	7.71673	55.4565	30.397	35.8839	40.9005	34.5619	52.3059	45.1158	38.1536
PCHAS_0616900	10.1023	22.9573	3.77677	6.31334	6.25439	14.3558	22.7008	30.0845	21.6772	37.9345	125.295	60.4672	26.8602	51.04	47.3416	37.0321	43.3265	30.875	13.2816	7.98721
PCHAS_0617000	13.2823	16.6879	4.11298	4.15328	4.65025	4.36132	8.12284	13.6965	4.15932	11.1148	46.1455	20.1154	20.7249	90.8107	24.3233	32.6914	47.5147	37.3385	7.83402	4.17194
PCHAS_0617100	179.811	216.585	221.119	221.229	237.036	153.597	184.542	185.766	126.653	153.518	79.8858	128.416	62.7722	86.8466	88.4549	127.528	106.335	134.775	208.21	208.362
PCHAS_0617200	2.47356	2.84734	1.48123	1.1237	2.1391	0.876767	1.25903	1.02226	0.766958	0.901681	2.14265	1.89925	1.63348	12.2422	2.40866	3.2158	5.74849	3.30078	1.65838	1.43092
PCHAS_0617300	50.7707	57.8922	55.6187	56.9297	52.0016	34.59	49.721	48.115	26.7876	39.4558	18.5674	38.8554	13.2658	22.6749	18.8809	33.6467	26.4662	30.6261	43.2701	47.706
PCHAS_0617400	0.622975	0.931701	0.512895	0.422968	0.637258	0.34063	0.267179	0.371043	0.300472	0.377785	0.839428	0.71025	0.516884	1.86517	0.727394	1.23529	1.5014	1.15286	0.692079	0.594568
PCHAS_0617500	10.3205	14.2728	9.38007	13.4472	7.77094	13.5983	20.152	34.7618	8.66209	38.4428	37.3007	36.0817	5.25168	17.4665	9.1834	5.16811	6.12022	3.88877	1.96065	6.91072
PCHAS_0617600	0.119591	0.122645	0.0425345	0.187912	0.0542959	0.041542	0	0.0284914	0	0.071204	0.0241715	0	0.11907	0	0.0407588	0	0.155639	0.0295083	0.0341633	0.0308173
PCHAS_0617700	199.003	159.291	182.761	185.338	173.912	233.668	188.079	174.728	206.836	167.576	67.9808	121.43	25.5809	56.6437	56.5195	71.547	59.2751	59.9372	128.109	157.694
PCHAS_0617800	380.352	379.001	413.508	422.282	417.442	293.11	313.742	274.51	297.607	286.881	126.296	189.124	74.7844	193.781	126.907	205.344	152.867	190.064	351.527	361.163
PCHAS_0617900	0.684908	0.877994	0.456746	0.597879	0.777391	0.297392	0.610076	0.475918	0	0.0849563	0.63448	0.195215	1.42068	0	0.291785	1.00568	1.11419	1.19705	0.652184	0.735386
PCHAS_0618000	16.6095	22.9554	26.1911	18.3503	28.3766	7.8881	9.01557	7.1103	8.44918	6.56705	3.01612	5.76969	2.58393	5.24478	4.4225	7.73862	3.3775	8.32461	12.2326	17.3878
PCHAS_0618100	1.93814	1.3803	1.53185	2.25583	2.28133	0.374025	1.15092	1.79566	0.934803	0.641089	0.870518	0	0.536028	8.70411	0	1.75129	2.80261	1.06272	1.23036	1.10986
PCHAS_0618200	61.0604	72.744	86.7502	83.4287	88.6405	35.1584	65.0303	64.4336	39.6142	61.2503	35.5485	41.9957	50.3866	26.8258	44.6745	45.8781	42.108	56.4982	65.4109	70.5489
PCHAS_0618300	138.516	166.631	145.308	167.524	156.187	162.361	190.239	241.809	190.306	178.248	202.388	199.54	29.7224	82.7379	66.8593	67.9757	52.171	47.9834	66.2737	116.049
PCHAS_0618400	48.8171	48.5616	17.0153	25.8242	22.0158	38.6629	40.0048	73.0374	28.3958	47.3767	60.1875	66.1195	39.3696	228.882	65.8853	95.2793	146.758	86.244	25.6596	26.4172
PCHAS_0618500	55.9342	63.4192	64.2534	60.4118	75.5008	33.9113	48.3994	47.5091	30.1618	46.4379	24.5065	38.7374	12.4525	28.0842	22.8523	33.6212	28.2586	34.0318	49.722	59.1762
PCHAS_0618600	34.1187	37.9017	38.1822	38.2842	37.9622	26.0835	34.1951	37.3438	25.4651	36.3949	33.1994	35.6347	37.3811	28.4532	38.7874	43.8906	40.0054	48.6353	44.5098	35.7364
PCHAS_0618700	4.64975	3.61247	2.63097	2.02946	2.02575	0.978887	0.502027	1.84625	1.8349	0.629189	4.41419	3.85538	5.6115	28.4752	5.52248	10.3127	12.3776	9.56075	3.42132	1.99698
PCHAS_0618800	2246.26	2392.73	2439.82	2300.54	2420.43	1736.1	1904.46	1680.02	1894.54	1625.01	1276.1	1447.99	1957.26	1043.89	2166.67	2284.36	2118.92	2372.94	2643.59	2492.6
PCHAS_0618900	2099.53	2267.21	2377.07	2145.26	2373.88	1632.57	1942.66	1725.14	1917.89	1638.87	1247.89	1633.07	2014.37	1209.49	2062.98	2174.08	1994.45	2360.03	2648.73	2409.72
PCHAS_0619000	43.6409	50.4284	46.674	45.2319	45.6734	62.7726	54.0934	74.3897	57.8991	78.8656	60.8746	74.4219	9.79173	19.875	28.2807	19.328	15.5987	19.2612	31.0791	42.132
PCHAS_0619100	23.268	25.3983	25.8418	25.0552	24.0932	14.8888	19.6739	19.4069	9.39785	24.3154	11.4257	16.9039	6.8041	9.72278	12.2604	17.0727	15.0838	16.3494	22.1459	23.6116
PCHAS_0619200	149.797	200.411	208.791	198.999	216.094	138.47	155.345	145.421	138.567	118.67	84.0318	110.778	107.75	125.875	93.4032	123.677	110.444	158.296	177.484	175.751
PCHAS_0619300	13.7263	14.6633	18.8622	21.5134	18.8846	9.39162	14.8201	17.5894	5.86813	11.454	29.2145	14.938	44.002	8.40602	17.3659	12.9668	16.9164	24.8883	15.744	17.9535
PCHAS_0619400	101.883	108.088	138.341	103.176	121.527	81.9394	84.046	88.4815	86.056	75.4524	103.977	85.83	137.418	202.856	100.065	97.2764	89.8108	115.788	82.4393	129.977
PCHAS_0619500	15.3355	14.9407	7.09059	12.0482	10.2117	7.45784	4.37119	3.65351	5.32555	3.65226	15.4979	6.2942	15.2687	24.7935	16.7251	37.414	53.8865	46.1637	14.8948	8.6939
PCHAS_0619600	113.125	132.913	135.735	128.247	136.807	70.9063	94.0038	74.7656	68.3147	66.1416	46.1222	60.4762	68.2063	78.5758	71.9357	80.3032	81.925	98.106	103.798	114.624
PCHAS_0619700	187.097	175.16	198.917	192.948	184.823	179.928	165.462	188.296	187.05	156.859	274.818	186.327	198.953	54.1447	260.999	210.619	219.376	226.968	208.56	204.818
PCHAS_0619800	259.195	239.178	258.499	238.892	261.049	232.494	203.944	183.466	259.127	201.174	109.685	155.561	104.847	219.344	186.716	236.425	201.788	206.273	260.222	272.36
PCHAS_0619900	116.836	124.147	128.454	113.721	133.005	56.7229	78.7322	72.04	35.8854	75.6087	73.0296	68.6987	180.969	87.6628	129.947	173.654	155.551	189.863	163.2	134.458
PCHAS_0620000	114.367	102.349	104.158	100.911	104.034	94.767	75.7857	43.6975	65.5691	47.2616	21.1841	37.9569	9.97502	24.9194	25.215	45.9603	40.1185	50.9618	97.7482	102.076
PCHAS_0620100	153.805	154.524	136.758	130.665	110.378	241.692	233.771	247.554	270.9	275.723	319.194	347.573	51.6526	123.345	140.409	98.8556	107.231	94.8754	118.56	123.462
PCHAS_0620200	13.922	13.4158	11.2904	13.3578	10.0078	10.4224	11.5884	14.039	6.56431	15.3276	6.98617	11.7401	3.52507	7.76145	4.21309	6.60438	6.95058	6.60375	6.82267	10.5461
PCHAS_0620300	385.383	590.928	629.972	593.197	651.09	355.144	584.757	733.163	405.989	594.233	817.251	765.98	358.447	341.774	317.446	292.082	237.601	431.194	421.259	472.112
PCHAS_0620400	25.2534	30.0604	26.0186	28.2556	29.2195	21.3503	28.8022	32.7876	17.5453	31.3245	18.9718	27.4203	13.3034	18.902	14.6862	16.3897	12.3897	17.8855	19.8482	26.9425
PCHAS_0620500	16.9854	24.3588	24.8265	16.6551	23.1816	8.21709	11.3299	10.3474	4.37674	7.61938	24.9248	12.9984	45.1742	28.2133	22.7327	23.8628	24.9819	31.8632	22.7098	17.6876
PCHAS_0620600	290.745	296.928	298.659	276.202	317.194	272.555	245.575	259.27	277.612	243.183	148.269	206.79	107.685	141.191	174.92	232	173.104	214.156	299.754	306.749
PCHAS_0620700	1.74644	1.83174	0.352925	0.83156	0.961097	2.20602	4.8083	8.88879	3.96283	12.5251	25.6718	18.463	2.56873	19.2514	8.65769	4.73421	4.90731	4.11334	0.90709	0.920531
PCHAS_0620800	3480.83	3327.54	3413.75	3297.75	3418.62	2971.15	2818.96	2226.58	3249.89	2253.81	1634.06	2017.44	2906.15	2517.5	3317.94	3804.87	3583.87	3460.99	4199.58	3776.23
PCHAS_0620900	15.5617	21.4084	8.09963	6.95782	7.08433	2.85662	3.83162	6.17901	3.29518	2.25984	23.0143	12.1163	33.6961	122.728	33.8487	38.9261	64.6264	50.2598	17.8902	7.17247
PCHAS_0621000	661.652	537.527	578.545	662.65	533.923	729.285	587.3	673.103	736.865	683.547	302.766	545.977	149.72	303.898	272.022	319.836	299.198	290.41	403.963	513.437
PCHAS_0621100	248.295	261.138	279.557	255.665	254.193	230.977	258.827	272.876	266.951	249.44	324.725	310.248	214.303	310.704	271.161	262.561	205.087	321.499	247.046	287.229
PCHAS_0621200	20.5127	26.6416	24.9589	18.0241	27.3672	15.4697	18.7524	24.1132	12.8878	20.8909	42.2782	27.6945	27.5447	10.9092	27.5964	20.1204	13.1723	25.3068	22.7453	25.7339
PCHAS_0621300	15.6159	38.4189	32.9596	26.4371	32.7038	10.6845	23.0424	21.2321	10.9554	15.0265	29.3308	21.0406	20.0238	25.5019	10.483	14.9656	11.8037	29.1902	24.1071	24.3881
PCHAS_0621400	5.86582	6.92972	2.04536	4.06626	0.957342	4.99409	4.91758	12.0566	9.48613	24.824	368.345	48.3867	107.072	139.464	175.809	33.049	43.4086	30.6497	4.10703	5.48309
PCHAS_0621500	31.8247	34.3221	36.4673	32.5083	38.7695	15.0075	19.9463	21.6729	10.3016	22.0096	18.4484	14.985	38.3201	22.1353	29.9675	37.1141	33.2606	44.067	35.548	32.8504
PCHAS_0621600	251.083	260.616	276.84	250.865	294.959	214.698	190.013	172.22	172.621	184.687	108.88	127.05	188.758	137.057	186.748	216.431	199.088	228.758	253.837	263.333
PCHAS_0621700	133.464	130.537	135.507	146.035	128.597	157.21	159.606	178.236	169.395	150.198	212.584	196.652	186.795	83.9963	155.033	139.584	144.995	134.46	114.775	147.565
PCHAS_0621800	57.6406	78.9044	74.2238	67.5229	76.5614	34.1453	55.5604	66.2091	30.3827	50.8655	120.455	67.9454	171.656	58.2438	96.1197	83.1478	91.0895	112.128	79.2426	71.8794
PCHAS_0621900	633.095	604.301	535.251	590.421	492.265	876.762	804.64	827.384	1082.47	815.802	721.883	817.853	262.64	675.004	501.91	488.72	518.658	406.449	455.388	558.474
PCHAS_0622000	77.1416	56.3878	8.46448	8.30999	19.0433	3.61086	15.2046	8.99357	9.9746	7.00346	58.7176	37.0507	69.7242	552.829	117.658	188.351	303.674	200.331	42.3544	13.9572
PCHAS_0622100	89.8235	56.0712	9.72303	11.5058	18.6174	4.40893	14.6104	12.0954	11.8669	8.42898	67.2916	34.7294	79.7113	686.645	157.393	251.167	344.342	218.26	53.2715	19.121
PCHAS_0622200	42.7559	70.3307	80.2394	62.673	89.9007	22.6722	37.0734	49.1278	26.2793	28.4416	24.8545	29.7651	34.8468	38.233	25.4686	41.54	35.7005	66.2857	87.0107	57.526
PCHAS_0622300	5.34717	11.5876	2.26405	1.00023	1.25237	0.663366	1.36084	1.97152	0.552651	0.758017	7.46237	4.35448	4.75345	25.7291	7.8103	14.3224	24.8533	18.377	3.27323	3.44475
PCHAS_0622400	9.01572	9.59481	2.72257	2.00465	3.34668	1.47724	1.21218	1.21579	2.58446	2.02563	10.6584	6.39999	10.5854	89.3817	15.9433	21.6729	45.3834	25.8133	8.98991	3.72596
PCHAS_0622500	3.00306	4.56257	0.89007	0.582549	0.925782	0.579534	0.792578	0.52996	0.48281	0.82778	2.02324	3.04335	4.42959	35.9642	5.68607	9.34664	12.3038	8.09591	2.22412	1.43306
PCHAS_0622600	74.0405	92.7239	84.7935	82.0632	77.2411	62.6099	79.435	91.9856	44.1062	89.5168	90.1822	83.2043	117.732	85.7072	95.7576	87.8993	83.173	102.172	84.2165	78.1692
PCHAS_0622700	28.0286	35.9302	37.3829	29.8642	41.378	18.6133	23.9871	20.6217	20.8745	20.042	20.5497	25.3762	26.6753	22.2132	16.8575	29.4233	25.0332	38.9863	41.604	30.8024
PCHAS_0622800	49.0016	54.7626	65.9143	52.098	68.4533	17.458	28.3524	11.9734	29.0885	13.0915	19.4696	8.59484	39.6143	33.856	54.2412	60.172	44.9674	82.1553	77.1692	65.8338
PCHAS_0622900	61.1193	69.5329	81.6565	63.1436	81.9692	23.8914	36.3408	23.3684	20.8652	19.0792	24.8014	20.5837	66.9228	37.9082	55.1395	73.5182	67.8956	88.1316	89.4198	72.7065
PCHAS_0623000	5.31655	6.76737	2.4968	2.74538	1.86983	12.9405	16.7416	24.9754	12.7582	37.3946	69.62	47.5092	9.22616	22.6994	22.4582	10.3523	10.9633	6.09719	2.78083	3.03911
PCHAS_0623100	83.001	86.2704	85.5318	87.6306	82.2455	67.9976	77.453	79.5926	48.5728	77.7527	45.3944	61.0156	47.5948	47.4937	53.154	67.5426	55.0871	65.301	73.6188	84.7827
PCHAS_0623200	12.6534	14.9093	14.8215	15.9234	16.8272	10.462	13.0931	11.8686	7.97586	14.2103	10.9879	10.8843	3.01754	7.65614	3.74436	3.13222	3.32799	3.03799	6.38514	10.0552
PCHAS_0623300	49.6121	51.1075	39.1101	47.4412	27.9868	75.6799	90.9503	104.627	81.0205	126.04	155.752	156.075	28.8656	52.6967	68.4063	46.2242	41.0796	37.5031	35.3823	42.0844
PCHAS_0623400	40.9195	54.3088	53.6119	50.1721	50.0006	24.1086	32.9712	34.2752	19.4573	24.7506	23.2335	29.1781	29.5122	23.3768	27.5964	34.4921	31.9898	47.0935	41.0985	42.4759
PCHAS_0623500	27.8339	34.5995	37.7983	32.4698	38.9319	19.3371	32.4561	26.7255	16.1098	19.0831	15.1724	19.04	17.2154	6.81822	17.2477	15.0903	18.1118	23.9333	32.0458	29.994
PCHAS_0623600	268.79	272.809	325.394	248.234	299.69	145.831	169.336	124.55	176.507	94.3237	183.047	113.788	491.598	362.848	331.157	391.513	384.859	411.742	287.375	337.475
PCHAS_0623700	12.3071	22.5011	2.51151	2.37761	4.88531	1.05125	2.8754	2.40331	0.875796	1.20124	17.5347	13.1112	24.1052	106.011	26.1295	51.41	49.8883	30.1179	5.18714	5.71891
PCHAS_0623800	2.35522	4.27332	1.15985	1.56569	0.79512	5.09754	9.81169	13.2939	7.70711	19.0927	49.8369	30.9828	6.04279	13.1808	14.6956	7.71049	8.60598	7.28652	1.44913	2.19422
PCHAS_0623900	21.2472	25.9413	26.5321	24.283	24.7414	15.1595	22.4062	25.0317	10.4214	28.9641	19.0165	25.1325	10.2096	14.1428	12.3892	15.5189	12.8392	17.5792	19.8248	23.3182
PCHAS_0624000	42.111	47.3533	49.662	47.0143	48.8594	39.7777	42.3798	43.4742	37.8425	36.7292	20.6065	31.3332	9.19464	29.8608	10.5753	13.4181	15.8644	16.4062	24.2705	37.8851
PCHAS_0624100	32.7561	50.8896	8.55869	4.54498	11.4991	2.48236	5.97574	6.18465	2.21578	5.60075	32.3365	27.1358	47.3373	223.999	58.3541	98.0059	151.082	99.9313	22.2892	12.2141
PCHAS_0624200	5.43258	8.37351	3.33531	3.47203	5.97039	12.019	20.2778	31.8171	16.4233	32.4416	101.371	71.8906	19.3176	44.4382	27.3319	16.1291	20.8315	15.5588	5.72728	4.91636
PCHAS_0624300	10.0334	10.5491	11.1125	9.73807	10.023	5.96164	7.44764	8.96382	3.24743	9.49787	17.6999	9.18133	23.6598	12.4507	17.3227	12.5852	13.3154	17.4817	10.7483	12.3605
PCHAS_0624400	197.673	189.136	210.917	180.383	201.697	184.758	181.522	157.788	187.538	130.434	88.5562	119.886	59.8552	49.4207	115.294	155.783	140.563	127.216	204.917	216.356
PCHAS_0624500	37.7545	34.2905	37.5697	28.2941	34.4643	23.8575	21.3225	18.1806	21.0961	14.5873	26.8703	22.5292	71.581	9.74031	50.785	49.8655	48.3505	52.5243	44.6324	39.4331
PCHAS_0624600	4.251	5.44942	0	0	0.919049	7.38326	5.40934	2.17019	6.59036	12.6551	377.435	33.2334	114.881	171.819	202.834	35.3936	49.396	29.9686	0.867405	7.82451
PCHAS_0624620	14.9973	20.7041	15.0709	14.6409	14.7728	13.4092	11.5406	9.19661	15.6012	11.4918	7.71255	13.3549	6.62659	25.1075	13.4588	13.4712	15.3024	17.6264	17.4918	18.5227
PCHAS_0624640	57.6537	56.1694	38.9603	43.7852	54.9684	22.0296	22.596	38.459	40.0427	22.3123	24.4709	43.3822	31.5714	139.817	27.5091	21.8801	30.0127	39.8317	34.5864	51.9983
PCHAS_0624660	0.746089	2.33128	0.497546	0.976929	0.388132	1.70078	0.913787	0.388823	2.02417	1.31877	0.518367	2.07337	0.928548	28.2711	0.635699	0.884835	3.18602	1.6108	0.399624	0.600807
PCHAS_0624700	300.083	284.014	287.49	270.635	259.077	256.414	265.244	226.248	259.978	223.49	628.318	249.25	767.267	473.984	693.36	490.742	549.828	499.39	345.467	320.805
PCHAS_0624800	2002.83	1823.55	908.548	2102	577.228	4979.33	4964.38	6690.59	3842.93	9648.35	6310.66	8224.08	668.774	2349.36	2344.56	770.311	606.865	395.264	267.161	884.282
PCHAS_0624900	206.625	199.369	202.82	194.916	179.327	261.115	211.096	229.369	194.496	192.913	191.599	255.836	68.2063	299.336	109.797	158.599	204.812	153.498	130.111	159.353
PCHAS_0625000	196.064	235.217	209.513	180.02	191.352	150.089	142.064	115.268	147.285	113.791	356.141	105.952	641.475	306.82	473.137	315.317	412.132	331.282	233.06	206.381
PCHAS_0625100	736.13	647.225	603.958	753.583	504.806	1055.78	996.056	1256.7	820.348	1253.19	1145	1187.12	1306.01	668.882	1010.69	669.701	732.647	577.132	448.265	610.16
PCHAS_0625200	452.465	397.413	339.485	293.284	296.705	340.19	342.926	245.374	330.739	239.933	1760.83	393.621	3470.61	1507.58	1895.02	1105.86	1705.68	1109.95	553.908	445.321
PCHAS_0625300	102.125	124.688	30.5086	66.53	19.9127	817.081	827.269	1199.75	973.397	1404.87	1643.43	2052.85	168.039	572.73	578.317	179.163	127.442	94.2762	30.6483	71.9855
PCHAS_0625400	4.49841	13.2631	1.19995	1.17804	0.680777	47.6591	60.1038	83.0566	82.0134	97.7589	220.483	167.706	12.3167	109.092	60.5588	14.0233	33.6624	8.87958	0.642522	5.79593
PCHAS_0625500	164.988	141.23	142.759	153.758	114.983	140.245	133.079	109.79	134.14	98.5929	356.552	107.99	490.266	255.231	396.775	207.052	307.304	217.305	104.971	158.568
PCHAS_0625600	0.54061	1.84804	0.961381	0.707875	0.818144	0.312983	1.28412	0.214658	1.17336	0.80469	0.910557	1.23269	0.897091	0	0.307082	0	0.586302	1.11159	1.54434	0.696544
PCHAS_0625700	0.568885	0.546947	0.379374	0.186225	1.07617	0.247014	0.50673	0.677654	0	0.423389	15.3788	1.94575	9.55812	5.74838	8.72486	1.92765	2.77635	3.15828	1.0157	0.366488
PCHAS_0625800	88.4958	102.433	103.022	61.4695	92.6607	31.5731	44.8406	19.0367	52.4628	26.1665	917.949	131.868	2541.38	621.714	1103.63	627.62	944.373	689.573	281.621	130.237
PCHAS_0626000	149.887	201.846	216.439	168.948	218.433	85.6072	101.893	87.569	90.549	70.8625	200.095	85.1548	563.186	183.582	280.646	246.476	273.114	302.591	238.116	222.164
PCHAS_0626100	481.836	504.266	542.218	524.158	635.702	290.878	296.11	112.64	271.368	126.676	49.0548	81.9335	45.5049	195.346	102.77	203.071	144.257	176.027	505.436	477.593
PCHAS_0626200	3.47747	4.34909	0.829571	2.33223	0.513435	26.6634	26.7445	38.6956	36.0813	39.8944	34.7143	46.7054	3.16676	6.85631	11.7073	2.18422	3.58742	2.51133	0.60573	2.18562
PCHAS_0626300	33.3903	36.2492	28.4832	39.8956	22.8183	44.0386	47.7732	45.6162	32.8386	44.7308	14.1302	30.3355	4.41532	4.21746	9.42403	8.20279	6.45033	6.30782	9.09136	28.3672
PCHAS_0626400	3.53995	3.36432	2.60491	4.95489	2.12443	5.61827	6.30637	4.50759	3.31174	5.45087	1.78872	2.29628	1.21536	0	1.14407	0.496346	1.39004	0.903576	0.95894	2.59506
PCHAS_0626500	15.8289	14.0521	10.0977	17.1667	7.4652	20.9427	21.8717	19.7432	15.7027	16.6429	5.31739	12.2976	1.63711	7.08898	4.93149	3.1498	4.27979	3.35389	4.13348	9.43461
PCHAS_0626600	28.6752	27.7959	20.6769	29.5235	17.7152	30.5646	35.1292	30.6952	22.3373	22.92	10.48	15.5849	2.3466	19.0522	5.48893	3.40743	5.62334	4.74923	5.274	19.6372
PCHAS_0626700	2.47684	2.70472	0.570971	0.840824	0.138829	16.0921	15.035	22.6198	12.9418	21.8474	21.9714	25.4145	1.37003	14.8312	5.00237	2.23806	2.08925	0.679047	0.524112	1.06376
PCHAS_0626800	32.7161	27.6724	18.5593	38.9891	10.6142	48.7257	44.6664	42.5733	33.362	37.4452	9.71928	18.961	2.82249	10.1849	7.15674	3.35846	3.55268	2.33158	2.87935	16.991
PCHAS_0626900	5.39809	6.42562	1.54279	2.0195	0.729404	46.8778	48.083	70.9617	63.1838	72.0279	78.3218	102.865	7.67796	31.169	24.9682	7.83912	7.527	5.94615	1.10147	3.97435
PCHAS_0627000	72.1406	88.2983	47.4744	80.0516	41.0179	202.456	206.208	267.511	217.615	321.534	215.418	308.078	31.4494	98.8413	97.2356	30.3832	33.1516	26.1471	22.7039	39.3851
PCHAS_0627100	12.0691	22.3478	1.87373	9.78297	1.01472	142.075	150.165	193.286	200.829	208.732	223.222	264.714	22.4117	61.9447	66.2705	16.0986	18.6988	12.999	3.00992	11.3542
PCHAS_0627200	9.29906	12.8937	5.90598	8.94577	5.45685	42.19	39.5558	53.5765	57.2538	51.6938	37.9736	58.4181	3.30662	7.6705	10.672	3.6011	6.17449	6.08737	3.25277	7.33548
PCHAS_0627300	15.7057	14.7644	6.51695	15.081	11.8842	5.45561	3.73058	7.48341	6.81762	3.11702	26.4532	7.16237	41.6993	0	28.548	15.6107	23.8463	14.2092	7.47763	13.4905
PCHAS_0627400	62.683	57.9839	55.363	47.1624	64.7559	49.7067	52.2281	51.2198	31.5125	56.3141	69.8366	64.9388	146.99	107.211	112.765	95.3669	85.8468	94.7283	84.1483	74.4678
PCHAS_0700100	14.714	12.689	19.7436	10.8593	16.3971	5.57578	7.14891	6.05486	4.64519	6.37135	31.3617	8.23515	101.883	21.6261	54.7065	38.7985	56.5769	55.1184	37.0653	25.1625
PCHAS_0700200	0	0.239535	0	0.489341	0.282784	1.62269	2.33018	2.22583	0.405561	3.05947	4.34322	2.55641	0.465107	0	0.31842	1.77285	0.60795	0	0	0
PCHAS_0700300	0.390537	0.500635	1.21538	2.04548	0.738785	1.01744	0.347868	2.09343	1.27145	2.03458	1.97336	0.667874	1.45813	0	0	0.793994	0	0.240905	0.836725	0
PCHAS_0700400	16.0818	18.0206	14.3993	14.431	14.3814	27.1501	28.8498	31.3472	22.9442	32.8095	26.5943	31.1563	5.03866	22.7274	14.3731	13.4136	10.9769	9.15707	9.79847	12.1715
PCHAS_0700500	1.01893	5.48599	3.8052	3.73574	4.31768	4.24732	5.80869	12.1375	2.21153	3.33667	13.1805	10.4551	2.53624	8.23678	2.43089	1.65726	1.32607	3.26839	2.03753	4.98878
PCHAS_0700600	9.84787	11.0152	8.92805	10.3664	8.10925	11.9058	12.7279	10.3507	7.54382	13.7962	10.6351	10.2368	4.80636	11.707	9.0489	10.0762	9.42371	11.3156	6.75721	9.08091
PCHAS_0700700	0.439001	0.312646	0.56383	1.02192	0.664372	1.01663	1.21656	0.406729	0.846954	0.580842	0.246472	0.166834	0.121414	0	0.166243	0.396678	0.634807	0.0601779	0.209013	0.377085
PCHAS_0700800	9.09212	12.3151	13.4231	10.5575	9.34626	4.76724	6.41786	3.67828	7.44674	3.31954	71.4268	14.6687	152.441	48.5365	65.7753	30.2271	51.9076	38.519	12.9866	11.2726
PCHAS_0700900	0.617578	1.31947	0.366085	0.269552	0.467313	3.57543	6.60123	5.64004	3.57443	5.82196	12.0663	14.786	1.53722	8.32054	3.85882	1.11608	0	1.52383	0.588071	1.32619
PCHAS_0701000	7.46384	14.5695	4.3741	7.32987	2.56717	36.2387	30.522	48.4958	36.0813	72.2138	57.943	96.3118	5.91128	27.4252	28.0396	5.97788	7.72674	2.30206	1.93834	6.33829
PCHAS_0701100	1.80382	2.05541	2.13852	0.524871	0.909949	1.39241	1.78526	1.90996	0.870015	2.68496	19.8495	5.48406	26.9394	16.2017	9.56311	3.80314	12.3897	8.90156	2.00391	3.09882
PCHAS_0701200	4.27666	5.75643	3.80265	1.39996	2.75067	1.11417	2.66658	2.29245	2.32055	3.50116	240.948	29.2547	284.755	95.071	168.348	37.6775	82.0947	37.9884	5.19221	7.4388
PCHAS_0701300	1.42651	2.0899	2.3556	2.66839	2.15884	3.89338	3.63043	12.8658	5.30767	10.3134	30.6858	27.8804	5.57973	8.23678	11.8072	2.76211	1.32607	4.77687	2.3286	1.31284
PCHAS_0701400	0.510056	0.36779	0.283452	0.292192	0.144732	1.55029	1.53336	2.62017	1.3838	3.7486	2.12626	4.03424	0.238047	2.57696	0.706207	0.604908	0.311156	0.157315	0.0910662	0.287515
PCHAS_0701451	0.886548	5.11415	2.759	4.06296	3.35419	3.07957	4.73811	5.28026	3.84839	1.31961	5.82358	1.51612	6.62014	17.9165	6.79838	2.40323	2.88444	3.8281	3.16571	3.99793
PCHAS_0701500	106.665	118.952	105.381	85.5329	91.8353	64.6255	61.5405	55.4859	64.4081	56.6156	494.779	108.725	840.641	401.047	640.019	331.983	440.304	329.609	186.997	129.027
PCHAS_0701600	0.807024	2.06907	0.179394	0.792538	0	0.350416	1.79712	2.40331	2.18949	3.30342	2.6506	0	0	0	0	0	0	0.248909	0	0.259951
PCHAS_0701700	0.112252	0.287796	0.149716	0.146983	0.212349	0.194963	0.499939	0.936002	0.730909	0.751887	0.340323	0.575902	0	2.26854	0.191287	0.0760728	0.18261	0.0692435	0	0.361576
PCHAS_0701800	283.659	233.879	245.297	251.127	237.617	253.771	224.233	216.4	246.153	221.348	339.642	227.237	789.39	335.666	551.043	427.735	482.983	401.822	286.911	298.268
PCHAS_0701900	245.664	221.208	248.593	204.346	215.543	220.105	218.007	215.381	225.316	237.752	733.911	297.846	2081.44	555.749	1052.44	745.456	1002.09	827.812	356.782	289.95
PCHAS_0702000	144.287	153.649	138.648	130.936	137.512	135.611	160.247	146.855	128.339	123.357	277.325	162.419	460.299	221.464	256.382	203.301	228.781	217.16	153.916	150.313
PCHAS_0702100	31.2374	56.9565	7.07316	28.9618	6.01933	401.345	483.903	684.568	654.825	784.662	1455.66	1299.34	73.4067	196.051	354.102	93.3557	70.7009	42.1284	11.9164	26.4983
PCHAS_0702200	51.1694	45.6521	32.6652	43.6858	25.8128	117.52	108.187	148.028	133.435	157.352	283.18	194.246	64.8494	250.001	138.301	57.1602	63.422	40.9293	19.008	25.1157
PCHAS_0702300	5.45573	9.40147	2.42552	5.21141	2.19949	17.3203	30.3529	47.9956	21.9355	57.5111	99.4689	79.535	9.46141	27.1122	21.0326	6.7279	5.09237	4.63432	1.40522	3.28422
PCHAS_0702400	144.857	145.699	164.222	157.577	133.22	117.087	126.549	131.738	108.832	104.077	92.3388	117.193	102.622	135.113	99.2141	107.231	108.762	134.721	123.347	138.903
PCHAS_0702500	0.361675	0.800827	0.116941	0.387472	0.572228	0.342637	0.410021	0.352494	0.356814	0.538348	0.598098	0.224915	0.245522	0	0.504266	0.534775	1.39068	0.892405	0.281778	0.593087
PCHAS_0702600	293.064	321.942	300.644	343.21	291.131	392.64	398.546	468.574	330.794	451.384	250.633	402.017	74.1171	174.195	136.869	108.863	93.0556	102.473	175.16	237.764
PCHAS_0702700	20.9604	28.0314	30.021	24.4785	27.6057	15.1522	22.808	27.3973	13.7709	23.4416	15.6864	20.1508	6.48634	13.7382	9.84666	13.8208	9.58429	11.0425	20.7142	22.3349
PCHAS_0702800	14.6021	22.3925	20.6283	17.1544	23.0795	9.48091	10.9402	12.5172	7.553	10.055	5.79237	8.63508	6.62386	22.0635	7.32545	12.1154	7.99215	14.0583	20.4669	18.9019
PCHAS_0702900	513.078	490.048	469.363	558.665	411.804	638.26	667.152	735.453	713.111	672.157	552.344	692.362	186.043	534.968	350.262	335.575	311.574	281.436	300.256	453.42
PCHAS_0703000	30.2164	41.6912	41.4314	42.0431	47.7869	28.4485	41.2943	58.6042	22.3315	66.6289	90.653	72.8093	11.3333	40.6305	26.9045	17.7124	15.9683	17.1437	33.1928	31.2371
PCHAS_0703100	16.4011	27.446	4.23703	2.08952	4.93066	0.307957	2.88235	2.45532	0.913992	2.24334	21.7936	13.3419	29.7906	122.728	30.8949	53.3518	71.6782	56.7106	11.2066	6.93926
PCHAS_0703200	1.76879	4.53488	0.524248	0.772019	3.12298	0	1.05036	0.702326	0	0	8.34176	4.03318	11.7406	0	4.01889	10.3887	5.75487	9.45611	0.842141	0.759661
PCHAS_0703300	0.310235	0.621398	0.620662	0.380833	0.92433	0.235736	0.13817	0.207872	0.168336	0.375197	0.19595	0.331591	0.048263	0	0.19825	0.657014	0.56777	0.789403	0.470814	0.374737
PCHAS_0703400	74.3681	85.7586	79.4082	69.3125	83.5499	53.0196	57.8539	62.2817	62.0269	51.7225	88.6113	76.6412	38.8004	78.7559	51.4665	59.4222	61.2827	66.5078	65.8671	70.7135
PCHAS_0703600	1.48118	1.9304	0.460955	0.549514	0.523036	0.21438	0.307849	0.676346	0.214321	0.514435	1.82119	1.68869	2.82657	7.98231	2.48199	3.27905	4.09625	2.89331	1.16359	0.826981
PCHAS_0703700	1.88598	5.02874	1.34155	1.77804	1.54126	1.70332	3.09105	4.04383	2.2923	3.03183	10.7495	7.99872	3.9433	18.2949	6.17062	8.99795	12.2723	5.305	2.58605	1.65238
PCHAS_0703800	31.018	43.8598	22.865	35.3836	20.7775	77.34	86.4459	138.968	58.8087	146.511	198.063	182.118	20.0703	85.1462	55.3331	23.433	24.1071	17.2965	10.3757	17.8766
PCHAS_0703900	3.68052	4.98023	0.72724	1.07095	1.23778	0	0	0.974271	2.21898	0	6.40578	2.79742	5.59851	24.7935	9.05942	13.857	11.9748	8.57687	2.33644	0.526903
PCHAS_0704000	0	0.566173	0	0	0	0	0	0.263053	0	0	0.446338	0.755304	0	8.92567	0.376315	0	0	0.272442	0	0
PCHAS_0704100	32.5593	42.6761	38.7091	28.7414	44.0147	9.53088	23.4622	18.7386	19.0565	16.3362	59.1533	25.0251	29.1393	177.438	36.1579	41.6512	48.8008	67.2488	43.3703	36.2944
PCHAS_0704200	316.754	218.065	27.6124	31.1747	78.5891	17.3794	54.7081	46.4453	38.1941	26.7072	264.316	139.259	287.719	2105.9	513.317	930.673	1447.08	860.746	188.266	53.3489
PCHAS_0704300	37.2568	47.6406	53.6663	38.4174	48.7716	20.545	26.8808	18.5287	13.5446	12.4776	34.9215	16.2472	94.8227	45.1759	64.7584	56.9358	57.8811	65.0392	56.1419	49.4432
PCHAS_0704350	7.85448	13.2613	5.45086	4.51522	8.26274	1.99637	3.07155	2.96661	4.15796	3.42184	8.71205	7.20756	7.62952	30.9724	15.9963	19.2145	25.555	15.5988	3.83081	5.67709
PCHAS_0704400	11.1609	15.3173	16.3452	14.0983	15.4003	7.86787	9.23974	6.2564	6.98222	5.1793	6.50206	3.5928	16.505	13.2679	10.964	13.0807	11.7482	13.9313	13.7847	15.2261
PCHAS_0704500	14.5186	16.8105	11.1049	10.0164	11.9311	14.0995	15.2963	14.3191	9.82625	13.013	9.46605	16.0187	4.66303	6.30992	6.11874	9.73341	9.1427	6.93361	5.79757	9.25264
PCHAS_0704600	8.92302	11.3275	6.85561	7.03297	5.50642	8.7269	10.6489	12.8994	5.64082	10.7028	7.35408	8.00019	4.74396	14.006	4.57644	5.04902	8.73766	5.3439	3.09346	6.3623
PCHAS_0704700	22.7532	26.3946	24.5055	28.4292	24.613	24.0728	25.5481	33.5931	17.2149	30.5287	23.3179	30.6905	5.1849	12.9528	10.9221	9.99022	10.1659	8.50033	10.8712	18.6839
PCHAS_0704800	324.73	375.012	390.24	327.536	424.792	165.525	221.418	146.543	132.454	143.631	107.833	118.509	271.717	246.962	249.637	386.406	321.225	446.036	499.157	395.354
PCHAS_0704900	241.579	197.616	233.792	235.059	220.168	181.974	168.819	85.8536	176.709	98.3402	94.4177	61.6278	191.026	242.759	163.759	197.184	249.694	192.655	221.141	235.595
PCHAS_0705000	33.7236	47.6625	7.24994	4.01433	10.5133	1.58609	9.06399	6.75998	2.68994	6.60232	77.1264	29.6727	67.543	292.649	73.8078	103.795	155.351	108.64	23.665	11.43
PCHAS_0705100	142.891	163.77	160.27	161.335	159.711	114.624	156.186	177.063	101.977	171.775	114.238	159.457	62.5437	70.9693	71.708	78.2075	70.9174	94.4175	123.495	151.341
PCHAS_0705200	0.942339	0.536888	0.744794	0.4113	0.47537	0.181854	0.746116	0.623617	0.227254	0.155851	0.846504	0.716237	0.521241	4.232	0.535275	0.993406	1.02199	0.645875	0.149553	1.48396
PCHAS_0705300	159.302	147.048	151.558	156.347	136.525	178.849	198.604	218.417	176.38	203.495	330.576	257.88	116.108	189.724	223.471	163.031	149.858	157.444	145.825	174.634
PCHAS_0705400	31.0558	25.9496	5.14262	6.42071	11.9876	4.58587	9.63154	7.63834	7.641	9.54466	29.3516	17.2015	31.922	243.931	47.7795	84.1853	134.586	80.971	15.9832	6.64192
PCHAS_0705500	29.4371	32.3875	32.1512	38.8485	37.5337	27.7778	39.641	41.968	24.1479	25.876	24.127	26.1618	9.23114	37.4742	10.6646	16.0223	15.0827	14.584	19.2021	28.9686
PCHAS_0705600	51.7462	73.3431	71.0129	64.1769	76.2426	37.6455	52.8759	64.6637	25.4291	54.0617	71.633	74.8018	78.2532	15.7849	44.9218	41.817	48.2841	80.2214	55.7817	68.6846
PCHAS_0705700	60.0648	67.001	59.4563	63.8751	61.8977	66.5704	67.3951	81.0362	58.701	64.7079	45.2741	56.1835	17.7592	67.0645	27.7095	24.7382	25.9126	31.5243	28.9135	45.1085
PCHAS_0705800	0.926367	1.78129	0.411846	0.539105	0.467313	0.178771	0.0916838	0.122609	0.335103	0.153209	1.56029	1.76024	1.15291	12.4808	2.19251	3.41799	2.17677	2.92067	0.441053	0.331547
PCHAS_0705900	5743.4	5525.32	5819.59	5584.15	5764.73	4933.6	4432.96	3794.21	5318.42	3740.03	2341.32	3089.67	3775.22	3743.2	4687.94	5479.84	5369.34	4978.53	6583.61	6153.98
PCHAS_0706000	5.78367	8.57264	11.2495	7.8098	4.23966	1.25566	2.57588	6.2436	1.56913	2.69028	6.21021	8.03635	6.74821	7.30524	7.69989	23.0274	22.3458	16.9465	7.22838	5.58894
PCHAS_0706100	196.123	184.412	215.99	186.411	191.343	155.619	155.186	130.448	183.666	101.507	52.3167	86.829	19.8242	60.358	56.8327	125.49	90.6942	84.1331	129.4	192.406
PCHAS_0706200	2726.93	2745.34	2888.54	2760.14	2852.37	2546.65	2370.99	2137.07	2644.09	1994.1	1484.01	1759.27	2513.26	1537.8	2547.26	2716.26	2656.67	2653.85	3074.59	2951.63
PCHAS_0706300	26.2655	35.6003	26.4781	31.9824	28.8627	29.0565	25.631	28.2981	26.5067	35.1115	21.8097	27.4656	14.1582	20.2856	24.8025	28.1172	21.7723	29.5145	21.267	29.315
PCHAS_0706400	23.1091	29.3286	16.9297	26.0369	14.1169	28.4023	35.6976	45.2694	23.4954	42.7398	34.9919	41.4892	10.3194	43.4435	16.6154	14.9845	18.7342	14.2076	7.45683	14.9368
PCHAS_0706500	0.141229	0.99574	0.502303	0.0924628	0.374031	0	0.125799	0	0.306529	0.105109	1.42724	0.483043	2.10921	0	2.64733	3.15844	3.21648	2.70066	0.403444	0.454913
PCHAS_0706600	0.487779	1.87587	0.433715	0	0.184548	0	0.434485	0	0	0.363026	2.46472	0.834171	0.607068	9.85767	2.07804	1.32226	1.58702	3.61067	1.74178	0
PCHAS_0706700	2.92238	5.66505	2.21821	1.11997	2.53493	0.371391	1.14282	1.01887	0.92822	0.212191	4.24991	3.16926	5.67737	11.5238	8.8668	10.8202	12.291	8.26599	4.78498	2.11225
PCHAS_0706800	984.892	853.343	924.535	900.184	848.058	891.806	785.742	702.529	866.041	708.662	457.139	553.89	709.289	786.718	746.297	867.429	877.728	813.09	891.87	902.327
PCHAS_0706900	41.4468	51.9762	49.9918	48.1355	52.9067	31.2983	37.5604	30.4814	23.4672	22.5313	32.2337	19.7231	80.2897	29.1342	48.826	53.9783	56.8713	61.1377	45.5581	45.5075
PCHAS_0707000	42.51	56.9269	46.0667	54.4201	46.9576	80.7544	92.9731	148.07	88.558	135.59	191.786	191.481	23.6187	84.3755	47.5391	19.5488	15.4362	15.2184	15.1796	38.878
PCHAS_0707100	58.6724	66.0182	11.8199	7.88918	15.1969	3.5712	9.28533	9.39845	5.39683	8.6123	92.8305	35.981	83.9116	373.016	119.947	162.094	238.19	158.456	36.8135	15.5874
PCHAS_0707200	12.9135	20.5807	23.7403	21.479	26.4094	16.0637	12.4353	14.5511	11.7415	10.9096	9.69952	9.54982	7.81861	0	4.16325	3.31135	4.54216	5.38229	10.4687	11.6918
PCHAS_0707300	1.37326	1.956	1.76374	1.39856	0.808209	0.795039	1.63096	1.99934	0.993522	2.72543	13.7238	4.17505	3.79799	18.5017	4.68029	2.68854	5.46086	2.07069	0.653823	0.589787
PCHAS_0707400	115.076	136.517	135.581	150.105	139.689	118.851	141.505	216.232	122.256	193.56	188.784	219.75	57.5065	115.613	72.3656	57.2597	40.0895	68.1351	78.5693	115.667
PCHAS_0707500	29.7914	42.3027	50.0242	33.7576	54.7961	14.1297	26.7405	21.2924	10.1964	13.3032	21.6537	22.7304	43.3515	13.8937	34.7558	40.5342	38.0256	56.1204	52.5353	45.6184
PCHAS_0707600	2736.55	2620.01	2702.11	2514.96	2591.72	2449.93	2273.42	1939.7	2747.95	1838.42	1433.98	1759.08	2509.25	1879.01	2771.3	2969.43	2830.22	2764.34	3132.83	2859.45
PCHAS_0707700	2311.51	2654.21	2815.95	2723.02	3007.89	2049.71	2239.55	2163.35	2103.73	1907.52	1450.69	1746.72	2245.97	1449.54	2066.47	2151.1	1896.49	2363.27	2867.22	2617.82
PCHAS_0707800	34.008	41.1369	40.8108	38.6708	42.373	20.6509	28.698	19.7982	17.7593	16.366	24.6778	17.054	53.4629	15.5025	33.5514	36.5633	36.605	38.9592	37.618	39.5344
PCHAS_0707900	25.9447	33.1015	26.6713	30.0604	28.1164	15.8497	25.6616	26.4205	11.9017	25.7658	29.5692	19.8751	9.16738	29.7723	14.5048	14.3101	19.1726	17.7711	19.1133	24.2539
PCHAS_0708000	0.778571	1.99612	1.38455	2.37874	1.17827	0.901497	0.462337	1.85486	0.563279	0.386297	1.31136	0.887644	1.29196	0	0.8845	1.40702	1.68875	0.640355	0.741372	0.334381
PCHAS_0708100	49.9726	57.6102	57.5958	52.2915	55.0382	20.8083	39.1768	38.4691	15.3708	42.1255	49.264	39.3381	72.2996	36.587	50.541	62.7886	58.7294	67.3669	58.7904	55.1592
PCHAS_0708200	30.2161	35.1902	38.2812	24.9544	33.6984	7.20318	17.2395	9.05715	9.64443	8.52492	6.18705	10.1321	8.60259	0	10.4328	19.6743	17.3488	23.9992	31.8754	30.6619
PCHAS_0708300	109.221	98.3277	16.1187	14.0937	33.0926	5.70668	24.4228	18.6247	9.59045	11.4678	102.019	51.5397	139.597	700.648	188.438	307.898	440.509	344.415	71.3667	23.6487
PCHAS_0708400	4.95743	8.34094	2.75498	2.63708	1.75838	22.6018	26.4947	30.2645	34.9693	40.5848	154.525	79.4804	17.7381	31.3082	69.695	20.7877	33.2667	14.7167	2.21277	3.59289
PCHAS_0708500	143.327	140.428	160.777	153.155	166.522	106.832	123.145	126.769	82.2206	106.961	58.2142	107.528	27.7045	71.0323	53.5734	71.9888	56.5433	79.7396	126.067	138.627
PCHAS_0708600	45.6055	72.3964	74.378	69.6169	73.6669	44.7346	69.8794	106.117	40.0038	64.7175	66.3863	80.0123	15.8806	0	17.7175	19.5368	8.45689	18.0744	38.1388	49.6263
PCHAS_0708800	2.65815	4.45599	1.45448	1.60642	1.3925	1.06541	2.54986	0.974271	0.887591	0	4.3394	2.09807	2.03582	16.529	5.92347	11.6399	14.6358	7.56783	2.04439	0.790355
PCHAS_0708900	23.8661	36.3496	19.54	28.4656	18.9531	54.174	75.7729	97.6725	80.5204	91.097	123.221	116.382	21.1741	47.7541	29.7977	9.28798	12.3009	6.41351	9.11282	17.354
PCHAS_0709000	22.5092	27.8394	6.63231	7.08747	8.54116	21.439	33.9848	54.7265	22.4932	63.079	191.052	142.235	38.1186	184.092	64.5666	52.16	78.3892	60.9959	13.1054	7.73946
PCHAS_0709100	332.38	314.871	289.755	369.901	312.23	519.842	419.224	435.975	542.528	462.46	350.147	504.435	58.0346	328.736	172.785	132.285	148.188	94.3208	236.987	272.461
PCHAS_0709200	19.7086	28.2706	4.59217	3.53672	5.79459	0.876382	3.96579	3.81851	1.54613	4.24134	23.6367	16.8522	38.418	128.366	34.3438	62.7589	81.892	67.4513	13.2273	7.57211
PCHAS_0709300	11.7342	14.0655	9.89165	14.3671	10.6088	10.4549	11.5381	16.1561	10.5843	14.0637	6.54527	11.467	4.93119	33.8772	6.88179	4.95724	11.6517	7.99037	5.33286	7.85396
PCHAS_0709400	19.0951	21.3571	20.0094	22.7259	17.7914	18.0625	19.2704	20.6744	12.0031	21.0193	9.13895	15.941	3.89587	11.2465	5.15654	6.17566	5.54502	5.23506	9.29008	15.7297
PCHAS_0709500	45.6566	50.9576	46.5523	52.5119	43.2847	40.8735	48.3622	66.1451	35.1996	63.8921	45.6056	48.2342	47.3883	32.0625	44.008	41.0956	35.5594	44.257	32.6064	47.2423
PCHAS_0709600	42.107	48.5887	46.7382	48.1748	40.3004	31.196	42.2102	55.2893	20.5855	59.366	66.006	47.0553	74.4557	47.7431	48.4871	43.1802	43.7442	55.2482	37.4155	44.0464
PCHAS_0709700	0.262894	0.505512	0.0779186	0	0.0331547	0	0.0780569	0.0521931	0	0	0.265678	0.299724	0.327186	0	0.373328	0.415711	0.855341	0.648671	0.438083	0.112908
PCHAS_0709800	1.22947	2.6268	0.728801	0.24392	0.84575	0	0.530978	0.399421	0.161727	0.277281	2.22142	1.27429	2.13293	4.51759	2.92048	4.19128	4.84868	3.35538	1.0643	0.864056
PCHAS_0709900	3.97627	6.95079	1.92848	3.78657	2.46174	8.16177	7.08366	12.0566	8.63024	16.6798	12.0551	13.6	0	14.6105	7.39189	4.89945	5.88047	5.7975	4.1305	3.26021
PCHAS_0710000	15.6397	19.4089	9.17219	16.775	8.93869	43.3459	37.0503	56.4843	39.0005	63.6469	64.3981	63.1662	9.11101	20.1745	18.9962	8.11832	12.9918	6.15793	3.08939	11.3616
PCHAS_0710100	75.2467	92.6015	42.8202	70.4766	40.5935	183.275	162.753	250.974	213.274	261.957	379.68	316.105	54.6467	157.435	119.477	75.8315	80.0704	52.4232	23.5186	41.5178
PCHAS_0710200	425.567	420.982	444.857	377.405	460.938	359.427	342.869	279.342	337.629	269.79	229.907	231.675	397.667	320.981	407.578	543.251	582.112	510.619	529.784	461.044
PCHAS_0710300	0.603835	0.552903	0.843712	0.564758	0.39164	1.19858	0.307349	0.41102	0.561679	0.1284	0.174351	0	0.429431	0	1.02899	0	0.561318	0.85138	0.123211	0.666862
PCHAS_0710400	111.386	135.746	156.294	139.456	153.329	82.684	111.449	126.867	77.4947	89.0308	74.9411	79.3259	88.1133	86.3413	71.2445	66.5931	48.6513	105.794	104.612	111.666
PCHAS_0710500	18.0747	17.2912	18.0436	19.8206	15.6275	11.9219	13.1362	15.5677	8.39247	15.5266	7.75474	10.9698	9.02781	12.1153	10.6756	12.5538	11.7029	11.4638	12.4588	16.1047
PCHAS_0710600	16.6823	22.3084	24.3309	19.3295	22.7038	14.383	17.5323	21.1586	11.4615	13.5769	13.2203	15.1882	3.28608	4.85091	5.72653	7.15746	6.63819	7.99557	14.571	16.5459
PCHAS_0710700	0.293848	0.376688	0.261279	0.128255	0.370584	0	0.34899	0.233354	0	0.145796	0.296959	0	0.487612	0	0.500741	0.398278	0.956051	0.966729	0.419712	0.378605
PCHAS_0710800	2.50858	4.15372	0.650573	0.410592	1.0282	0.544622	0.558624	0.622544	0.226863	0.622331	3.38019	2.86002	3.38223	21.1236	6.23413	8.35858	13.9431	7.3503	1.94084	0.40402
PCHAS_0710900	50.9382	60.1307	59.067	53.2759	53.9707	21.4551	36.2162	38.245	12.312	39.6463	57.9378	25.7051	134.03	55.8648	66.6848	67.441	68.3908	84.5131	53.5085	56.801
PCHAS_0711000	13.1174	26.1572	34.5584	21.2048	37.3746	11.5319	14.1364	16.9757	7.38121	11.5704	17.675	9.97002	28.2165	6.54549	18.7656	18.8766	20.0218	30.3682	26.8317	23.5779
PCHAS_0711100	0.735113	1.72765	1.08939	1.44384	1.32882	0.567452	0.945816	0.583776	0.354559	0.790259	0.371448	0.838098	0.508271	4.95204	0.487159	0.608889	0.398622	0.503843	0.46666	0.578814
PCHAS_0711200	34.4543	45.4239	42.1657	42.5478	38.6502	28.2184	43.5165	51.3247	22.0906	49.4331	52.1906	53.3776	19.3289	21.3307	26.3373	23.2473	24.1614	30.229	29.6673	35.8441
PCHAS_0711300	25.1449	31.6911	32.2982	26.5522	33.4102	12.1278	19.0364	15.8374	8.41974	14.1732	55.7761	17.6106	77.3356	51.3148	44.9523	39.339	38.7824	53.1238	31.9358	30.9891
PCHAS_0711400	18.6946	26.0488	21.1654	19.6134	24.8653	18.3523	23.5818	32.2278	18.1456	25.5798	34.0301	38.5234	15.3183	14.0797	14.0488	11.1741	11.7115	18.1932	16.751	17.2049
PCHAS_0711500	241.534	259.791	256.079	260.843	257.844	198.565	235.771	252.549	143.457	259.539	155.676	215.052	145.625	117.769	153.531	180.003	157.917	179.074	213.237	243.133
PCHAS_0711600	0.364213	0.649586	0.436486	0.435431	0.431366	0.412549	0.507787	0.697931	0.309326	1.06068	6.56123	1.62484	0.985397	3.84025	1.78099	0.837059	1.33955	1.05496	0.452363	0.428461
PCHAS_0711700	14.3387	27.0308	27.3738	17.1185	29.3585	7.32466	24.0415	26.1226	19.2219	18.2043	21.3096	14.4242	8.39777	17.0455	6.46791	6.85923	6.86055	8.8449	9.03547	14.1276
PCHAS_0711800	0.652995	0	1.16124	0	0.494112	0.567071	0.58165	0.388923	0	0.485987	0.329954	2.23343	0	0	0.556379	0.442531	1.06228	0.805607	0	0.420673
PCHAS_0711900	54.9449	79.0845	90.4245	64.3717	87.5284	34.3213	43.7899	35.0215	29.2905	30.8486	36.5307	46.1575	94.7748	38.9613	73.9189	73.8184	75.27	92.7599	108.081	71.4142
PCHAS_0712000	0.800976	1.30681	0.49638	0.667417	0.440791	0.969595	2.03229	3.67191	1.31702	4.44381	39.32	9.96205	5.61865	12.7535	10.0922	2.53314	4.97513	3.17413	0.866712	1.21965
PCHAS_0712100	0.490405	0.942987	0.072675	0	0.309236	0	0.145608	0	0.532196	0.12166	0.825996	0.559108	0.813781	0	1.11426	1.99407	2.12742	0.806692	0.583718	0.315929
PCHAS_0712200	4.10328	4.73405	1.09455	0.537284	1.86294	0.71267	2.92397	0.488781	3.56236	1.22153	3.73205	2.80687	0	0	4.1954	5.56154	2.67005	7.08717	1.17217	2.64342
PCHAS_0712300	1.08593	3.10539	0.371372	0.765648	0.632083	0	0.446438	0.0995043	0	0.248675	2.61694	2.28565	1.66338	13.5051	2.84695	4.30235	4.34847	2.47334	1.19313	0.322882
PCHAS_0712400	0.704507	3.0706	0.876991	0.737986	1.59927	0.489444	0.251014	0.503524	0	0	2.56308	1.44577	0.701438	5.69503	3.1214	5.34733	3.20902	2.43364	1.61003	0.54463
PCHAS_0712500	108.954	122.268	140.076	138.455	135.425	189.235	147.643	192.338	191.508	169.089	184.115	217.483	40.9021	101.07	84.6154	54.7124	43.0035	51.1229	80.6177	121.51
PCHAS_0712600	88.6039	92.7987	95.4758	82.1251	88.6763	72.8692	75.2494	52.6876	70.0708	59.4861	28.0268	43.2929	22.3023	63.2322	42.8972	64.5764	61.5425	60.5338	70.0831	86.3078
PCHAS_0712700	29.6625	32.387	33.8629	31.3661	35.6857	23.7278	33.0062	39.1236	17.0598	33.5668	38.3927	38.4053	26.0861	22.6924	27.9047	28.4093	25.2688	34.0552	27.9334	27.9705
PCHAS_0712800	1.22272	2.0899	0.966399	1.06736	1.23362	0.707887	0.726086	2.10384	0.294871	1.61778	18.1231	4.64673	8.7923	21.9647	9.95508	5.15593	7.07235	7.20721	1.74645	1.40036
PCHAS_0712900	60.931	69.8044	71.0968	73.9517	75.5152	61.8787	66.3546	82.226	48.7687	69.603	47.0515	62.3126	7.55799	57.273	25.1817	23.047	19.7584	23.7251	51.1769	62.3353
PCHAS_0712950	25.3791	24.4004	14.5068	11.8684	9.602	23.6138	11.3031	11.8766	47.2145	24.2848	21.0678	15.5006	22.5612	0	26.2578	35.627	53.0822	34.6652	25.8927	24.5246
PCHAS_0713000	2.23603	3.45271	0.768166	0.59888	0.769078	1.14743	1.99172	0.847493	0.882392	1.13465	61.3202	6.43115	23.9073	28.7563	35.246	11.0896	15.8728	11.0972	2.17759	1.63693
PCHAS_0713100	87.8836	124.052	115.166	107.317	113.449	75.7477	108.773	137.426	62.8674	111.706	185.445	145.79	110.195	73.1711	93.3903	91.0103	64.7904	127.103	99.1992	98.1775
PCHAS_0713200	31.925	43.8354	41.7598	35.8574	35.2159	22.4258	33.366	30.0852	17.5538	29.568	61.2281	19.8973	21.1906	51.6146	41.1045	26.7318	24.9288	26.6076	31.413	32.724
PCHAS_0713300	35.5951	49.9639	51.0481	39.5084	46.4834	14.7355	18.8645	18.1609	9.55326	15.0972	44.9327	21.6	100.826	20.6265	58.4829	53.1734	56.4525	67.996	49.4749	40.9307
PCHAS_0713400	571.485	673.969	619.805	653.324	584.192	609.086	693.865	779.214	652.527	740.446	870.377	851.349	376.967	348.487	424.806	419.937	359.798	496.008	522.585	565.104
PCHAS_0713500	52.8338	63.1548	58.5874	58.4457	61.1167	30.3241	40.8405	41.7761	24.5491	35.3665	22.0938	29.5985	30.232	27.6138	32.5982	42.1843	32.6013	44.6719	49.3337	54.7716
PCHAS_0713600	134.617	155.852	155.659	164.885	177.78	80.4169	111.628	117.857	56.6011	105.309	48.1333	81.3491	41.9221	82.9573	55.1379	77.3197	62.2605	84.3053	129.68	142.101
PCHAS_0713700	2.05708	2.98096	1.2724	2.34221	1.42121	1.39805	1.75266	1.59808	2.71768	3.59444	67.0658	8.87121	17.5871	18.0748	30.1772	8.84932	10.4757	7.06182	1.66072	2.30472
PCHAS_0713800	20.6981	19.9336	1.96185	2.47634	5.64468	0.912415	3.36914	2.5031	2.96452	1.5639	22.51	11.1401	27.1983	140.139	36.3456	62.8011	92.2969	64.811	11.1052	4.8734
PCHAS_0713900	2.30396	3.69185	1.21209	2.03634	0.857159	2.56768	4.61752	8.2334	2.29194	9.88813	17.9671	11.0323	2.67624	8.53625	6.31454	4.31982	4.12284	3.15035	1.06952	1.509
PCHAS_0714000	643.477	673.903	685.424	691.565	641.013	626.458	674.255	677.118	540.099	646.755	597.804	589.557	402.584	404.961	483.982	456.451	463.025	505.531	522.195	666.006
PCHAS_0714100	71.8074	93.629	114.927	107.457	108.671	42.7602	65.0583	76.7386	42.7483	53.7475	85.0079	58.9444	121.541	33.1697	76.9156	57.2838	65.4163	105.801	73.8467	81.9459
PCHAS_0714200	195.922	202.036	202.491	196.902	192.016	205.928	180.311	203.24	150.637	184.015	203.111	210.181	248.334	204.547	289.516	199.898	206.993	232.792	166.253	223.557
PCHAS_0714300	6.14069	7.7803	6.38066	6.91867	7.42911	5.82873	6.8054	8.50554	4.5718	6.69582	6.16962	8.42557	7.99788	10.1011	6.99644	6.38743	8.36334	7.70797	5.50733	7.26792
PCHAS_0714400	67.9455	69.4998	69.4925	76.5216	74.5894	46.4702	59.8947	45.9199	42.4076	36.9434	16.01	36.1232	9.63918	49.8026	16.1979	21.9495	24.0537	25.8425	42.7417	59.6477
PCHAS_0714500	412.655	465.178	464.733	505.786	480.994	563.687	598.575	676.553	573.686	606.081	493.487	635.044	95.4042	221.313	212.062	197.006	139.28	199.586	358.338	425.217
PCHAS_0714600	27.5676	37.9001	29.1303	29.8192	35.069	25.6749	41.9936	52.8269	21.6788	45.1968	80.3483	45.0946	23.8673	32.2968	26.5525	31.9496	31.1974	39.9253	18.2612	22.1351
PCHAS_0714700	51.7869	55.4016	51.3474	60.4922	48.4897	77.0033	72.3458	86.985	76.0115	90.9481	108.436	101.943	15.7651	15.0586	34.9188	21.2089	14.546	12.4103	20.7539	37.9225
PCHAS_0714800	3.26497	5.44104	1.45155	2.13758	1.48234	0.567071	1.1633	0.777845	2.12592	0.485987	5.60923	4.46685	6.5015	26.3931	7.23293	11.9483	10.6228	10.0701	3.26443	0.420673
PCHAS_0714900	18.6919	27.715	5.0645	4.46435	6.25244	9.75331	20.8656	31.7262	8.44472	41.4353	107.785	73.2605	29.3534	87.547	48.2572	54.2033	71.7775	57.5025	10.5991	7.54543
PCHAS_0715000	11.0246	15.4101	17.9992	13.8647	17.7683	5.94988	6.32477	4.67425	4.86673	4.17201	13.4703	4.68676	34.573	7.55249	16.4517	14.436	18.2385	19.7485	15.124	13.0007
PCHAS_0715100	50.697	50.2629	50.1132	54.4479	45.8708	50.7704	52.2679	69.6413	33.3615	73.8562	55.8121	62.165	29.9366	34.8783	34.373	36.9156	31.9363	36.6623	36.5912	49.1985
PCHAS_0715200	36.9562	43.1163	42.9211	37.5162	37.2332	45.2551	45.6789	45.2586	51.8217	45.4285	60.6372	50.0631	17.3123	37.7624	26.1812	21.3867	21.9538	21.1317	32.1755	36.2469
PCHAS_0715300	129.858	136.005	140.009	129.806	138.221	122.568	122.726	131.241	108.363	125.408	80.7775	95.234	105.752	97.0181	108.804	131.437	131.983	148.066	135.425	127.419
PCHAS_0715400	46.2859	43.0511	45.0238	41.24	46.3474	42.3109	33.169	47.4664	40.4108	36.779	29.3669	32.1383	24.2549	14.0662	32.0245	34.4337	31.1379	41.8616	40.015	41.7008
PCHAS_0715500	30.835	38.17	47.8234	40.5295	42.3902	32.5011	34.8043	42.3383	32.4409	35.3866	38.8924	42.2663	26.951	23.7845	33.0916	28.394	24.5065	36.4444	38.3272	33.057
PCHAS_0715600	25.8829	26.0928	32.7709	28.4071	33.0224	10.9112	15.6684	7.48341	11.8172	8.47829	5.92553	5.4434	6.67188	13.5424	7.99344	15.3268	10.3561	18.2912	22.9713	27.1969
PCHAS_0715700	25.1574	31.3362	27.2425	29.2092	25.5061	28.0823	34.2722	41.3929	21.1748	37.7727	24.4821	34.6806	7.23057	17.7224	10.2739	8.69166	8.20294	9.93994	10.0989	21.0443
PCHAS_0715800	27.3055	31.1778	30.9126	25.985	28.2263	14.7717	17.8096	9.77562	11.3348	13.5479	4.82528	10.2068	7.7994	24.1234	14.2389	24.673	18.4476	20.6172	30.4764	32.49
PCHAS_0715900	0.83816	0.586064	0.609759	0.698401	0.518911	0.529361	0.407228	0.453824	0.496138	0.226834	1.00104	0.260613	0	0	0.389535	0.516379	0	0.470022	0.326501	0.883571
PCHAS_0716000	110.07	111.178	96.1832	94.1791	101.383	109.43	146.052	151.687	129.336	162.143	215.759	212.901	71.3286	237.785	126.448	159.992	203.141	167.403	112.221	90.2264
PCHAS_0716100	46.4953	62.5223	41.3419	46.0956	41.3572	50.7599	66.7716	94.2675	45.3087	95.6194	120.346	110.994	39.6795	107.387	47.054	52.4731	56.1879	58.4153	29.4105	35.4548
PCHAS_0716200	455.011	440.369	441.652	445.063	397.111	524.227	502.181	539.848	613.789	449.269	383.801	536.322	212.075	256.446	367.609	411.554	336.187	322.051	459.595	471.806
PCHAS_0716300	0	0.898947	0.374117	0.183644	0.212251	0.487183	0.499708	0.501198	0	0.208761	0.708678	0.479697	0.698198	0	0	0.380188	0	0.692115	0.400649	0.180705
PCHAS_0716400	167.845	147.225	23.3952	24.0023	53.7842	9.96274	37.5433	30.1539	18.4043	16.7052	162.187	88.2868	248.002	1159.24	280.285	522.597	771.672	537.527	111.676	36.7929
PCHAS_0716500	1.32806	1.23815	0.751457	0.474262	0.365427	0	0.215083	0.143816	0	0.359418	1.70815	2.0647	1.20207	4.87984	4.32051	2.78187	5.10654	2.53214	0.689785	0.466671
PCHAS_0716600	103.463	107.066	109.017	106.351	100.868	98.9643	109.968	139.499	83.7491	141.728	145.17	149.584	78.006	92.9298	88.4107	83.3269	83.4243	91.0774	87.383	105.228
PCHAS_0716700	482.256	461.167	446.741	460.874	392.265	590.88	531.575	562.947	631.215	573.952	581.437	526.099	991.169	450.144	745.891	586.144	625.568	534.561	460.715	478.134
PCHAS_0716800	163.008	161.502	171.703	161.129	155.593	113.339	129.54	99.3083	117.933	86.0324	49.2587	74.7022	60.3314	86.1249	115.288	148.015	155.121	127.169	179.949	160.265
PCHAS_0716900	20.8478	24.2727	29.2669	25.8851	26.354	14.3133	17.6525	18.7569	11.0727	15.2603	10.7078	12.9189	16.3614	13.8788	14.7957	16.1563	16.9175	20.0315	18.7074	22.3106
PCHAS_0717000	3.08436	5.93083	1.92716	2.51052	0.820016	1.95458	2.15334	3.27688	3.0758	5.95592	304.372	29.7949	109.35	193.737	176.858	28.5291	52.0743	26.2765	3.81015	5.42399
PCHAS_0717100	56.605	69.6795	74.83	64.7924	69.6378	61.5272	67.4498	76.1352	49.2243	62.2153	78.2298	73.7238	61.5836	22.7274	55.8955	53.8577	48.7861	61.7409	48.9923	65.2043
PCHAS_0717200	0.208928	0.178552	0.0619238	0.0911903	0	0.483831	0.620337	0.414791	0.60462	0.725636	0.633422	0.476396	0.173348	0	0	0.0943931	0.453174	0.171838	0.0994731	0
PCHAS_0717300	229.889	248.911	263.451	237.717	239.557	187.496	202.281	172.663	179.327	167.109	189.444	137.197	353.635	193.781	271.788	285.705	268.558	291.011	258.51	258.518
PCHAS_0717400	15.9489	20.052	10.3632	8.83533	8.35499	11.7195	7.10318	18.9983	9.31971	7.76106	22.3169	15.7355	30.5373	111.571	35.5408	52.7953	65.8613	40.8663	13.1425	13.436
PCHAS_0717500	2.34521	3.63927	1.97552	1.29298	0.840593	0.428761	0.879568	3.38173	0.803703	1.10236	4.36586	2.9552	4.60853	14.9668	5.04812	7.36112	10.4414	5.78662	2.46823	1.11324
PCHAS_0717600	269.664	294.713	280.273	273.58	260.944	283.778	305.241	264.384	276.168	238.897	168.041	269.527	158.358	146.105	200.813	201.857	192.879	213.169	205.492	294.351
PCHAS_0717700	6.35255	6.56336	8.51484	7.26277	8.14301	4.85795	4.89839	5.02594	2.98393	4.51615	3.25782	4.05364	2.47803	1.91613	2.262	4.81913	4.7815	5.02986	6.29732	7.26867
PCHAS_0717750	9.75994	19.065	18.3206	15.4167	22.5073	12.9153	11.0395	13.1023	5.04365	8.07085	8.14112	14.3065	6.16979	6.26163	5.80792	4.4095	4.03232	8.60068	12.8341	16.5672
PCHAS_0717800	54.2876	43.6425	51.7477	55.1204	48.2152	42.7494	48.766	35.3478	33.9504	20.544	14.6455	22.8165	8.01605	18.5951	24.6956	30.8665	20.2074	33.2038	41.7274	48.3104
PCHAS_0717900	58.603	62.798	69.6569	62.6867	69.7711	40.9595	48.6841	48.2264	35.1486	41.4304	21.7869	29.7716	12.3447	24.5456	17.7652	29.3575	21.0756	30.8427	47.7073	58.2926
PCHAS_0718000	164.192	169.393	180.992	170.816	165.088	118.171	131.227	92.4339	142.791	82.8607	39.7778	65.3898	16.7955	181.819	55.5761	80.7865	115.257	79.7775	118.063	186.194
PCHAS_0718100	868.193	835.193	766.632	810.887	664.892	1152.41	1037.79	1254.78	1484.05	1232.03	1274.41	1510.38	419.889	1121.22	751.235	771.282	817.168	713.142	627.53	752.505
PCHAS_0718200	2189.72	2496.76	2627.23	2442.17	2628.21	1529.77	1983.17	1800.16	1631.94	1580.91	1510.45	1637.76	2213.02	1253.77	2018.36	2088.56	1833.69	2428.75	2709.55	2484.14
PCHAS_0718300	27.6412	34.1165	36.912	31.8879	38.0216	18.0254	28.3739	31.0901	12.0433	20.6483	23.4686	21.7901	21.9962	12.4597	20.8374	21.0303	22.0652	28.5234	24.3637	25.9493
PCHAS_0718400	11.7792	31.2066	35.145	26.049	37.6335	4.54634	16.7876	14.0314	4.54508	10.9096	23.8079	8.05766	46.9117	31.74	18.7346	13.8367	9.3682	31.3249	19.8157	22.2594
PCHAS_0718500	675.743	636.237	601.336	586.264	584.849	752.709	665.841	682.623	792.042	750.266	2170.88	955.46	1624.28	1673.56	1728.22	904.67	1066.95	797.573	630.052	682.155
PCHAS_0718600	58.4512	59.8463	61.6247	56.4578	59.9105	40.4761	40.2996	40.3293	34.1051	33.8976	52.3959	36.0894	72.9346	52.1594	63.9029	67.289	67.1785	78.5739	64.4048	56.8255
PCHAS_0718700	51.0472	95.9007	94.1697	63.768	101.007	31.082	58.0132	66.0492	29.2905	49.7819	98.1352	78.267	97.122	35.5733	58.4924	64.0195	50.5891	89.761	89.6738	75.5991
PCHAS_0718800	34.7128	42.8508	33.6896	38.5212	29.4714	46.4984	49.0411	64.6822	34.306	61.9134	69.32	63.6318	19.5774	42.7943	28.2236	25.011	30.7571	20.6197	16.0951	30.2067
PCHAS_0718900	14.8263	21.4388	13.0775	13.8225	12.6549	29.8709	43.317	55.8089	43.5067	61.0863	197.18	113.996	15.0569	38.3525	48.1051	16.5586	18.5235	12.8771	9.14841	13.4484
PCHAS_0719000	40.7501	36.3506	39.7158	39.1423	35.1864	38.3155	38.2407	36.4946	28.621	35.7885	26.1017	31.8769	7.77394	18.0335	17.994	22.7782	20.8068	19.816	29.6688	38.0686
PCHAS_0719100	41.1719	51.5693	49.6503	55.4829	48.0943	51.5458	57.9136	57.0134	37.9784	57.7089	32.8528	48.1133	8.54011	17.3345	16.9554	18.1363	18.4188	19.2595	24.993	44.7589
PCHAS_0719200	69.905	78.7479	86.6871	76.5332	85.0938	43.6519	51.23	45.4646	36.5356	40.5422	36.504	33.5852	64.1593	66.1479	59.064	76.2107	69.9816	87.0358	85.7387	73.3501
PCHAS_0719300	1.7351	4.27741	0.118676	0.699059	0.605966	0.927254	0.951093	0.635952	1.44843	1.98667	9.84642	3.65202	2.65776	5.39464	7.9605	11.216	12.159	5.2692	2.85958	0.687869
PCHAS_0719400	31.1428	29.4165	30.6788	29.0815	30.0148	27.6143	28.4702	34.7542	23.8356	30.7411	41.2456	38.122	40.1869	29.8125	36.0317	30.9915	39.4634	37.0058	24.5823	29.1439
PCHAS_0719500	32.4562	36.7303	42.6119	38.5139	40.1004	23.7814	27.329	16.7635	18.4365	18.3052	9.99369	8.6726	5.36476	10.2487	9.29002	10.1385	7.42486	13.1386	25.5332	31.8534
PCHAS_0719600	88.0819	100.746	110.718	95.2879	100.555	76.7575	84.913	92.2786	62.0269	81.4301	164.826	84.8289	231.186	115.509	151.838	136.124	140.799	149.717	107.587	114.672
PCHAS_0719700	65.4074	92.3439	98.8077	95.8555	100.313	41.6483	73.1086	69.0884	34.4857	49.6221	36.9411	50.0101	36.6375	19.6995	38.8697	40.9572	31.0806	57.3636	63.9067	84.2736
PCHAS_0719800	39.7465	56.6372	56.2727	52.7142	52.7937	26.9613	32.2129	31.4962	24.0659	29.2002	16.5496	21.5877	15.7104	6.89483	21.5112	25.6643	24.9755	38.0921	36.0607	47.035
PCHAS_0719900	71.6073	73.1708	72.9457	74.4692	67.1572	55.0097	64.2743	61.4722	42.8897	63.0807	29.4681	44.6267	15.8529	40.3527	30.3302	43.3485	38.9791	42.5999	53.3031	67.2447
PCHAS_0720000	369.652	445.092	468.957	438.213	446.038	274.006	353.959	290.145	328.085	278.058	131.415	288.986	187.307	240.12	226.096	263.037	236.242	336.332	406.36	406.534
PCHAS_0720100	1.35353	2.83402	0.842458	0.590772	0.5121	0.235086	0.482259	0.429953	0.489626	0.268629	2.09739	1.38884	2.91988	9.11798	3.69045	5.07563	4.25701	3.56239	1.09553	0.523184
PCHAS_0720200	5.09848	10.7478	10.3764	9.34633	10.5451	4.72277	10.2939	12.2815	3.93455	6.74579	17.6329	12.788	4.79425	0	3.28222	1.99634	2.58039	3.49447	4.53122	3.94145
PCHAS_0720300	501.098	459.443	407.479	390.006	375.721	407.573	376.465	371.524	381.327	360.79	677.038	425.623	1106.18	1049.93	827.892	841.187	1009.05	789.491	511.669	445.726
PCHAS_0720400	2.72397	3.90271	1.85216	1.25886	2.54618	1.11319	1.42727	1.14522	0.347776	0.238505	3.72439	1.09609	2.39303	32.382	4.09577	7.38408	6.25595	6.32582	2.0598	1.65161
PCHAS_0720500	0.35934	0.575805	0	0	0.339885	0	0.16004	0.107011	0.194981	0.133718	0.272359	0	0.223609	0	0	0	0	0.110831	0	0.347242
PCHAS_0720600	11.8526	15.9292	13.8818	14.1013	16.0568	5.86588	7.49248	5.61714	5.11739	3.22495	2.51153	3.05133	2.22061	2.57561	3.14912	4.31851	6.21985	6.91825	11.9234	13.9577
PCHAS_0720700	2.13707	1.36977	1.90021	1.63233	1.81923	2.01052	1.11042	1.16677	1.73939	0.265084	0.719901	0	0.664926	3.59906	0.758699	0.965522	0.579425	1.20841	1.14467	2.40931
PCHAS_0720800	19.8974	40.6514	44.0458	34.4668	41.8747	9.71955	16.2465	18.2701	8.99708	10.7979	40.0067	11.3425	63.9721	0	20.1322	24.4404	15.51	40.6571	19.2428	31.2446
PCHAS_0720900	82.6555	78.8851	80.637	80.5764	74.472	69.1468	75.4248	70.2934	53.9511	70.9913	55.1425	56.5064	63.0042	75.5563	65.3463	66.0814	72.1625	72.1789	67.7615	81.6301
PCHAS_0721000	2663.83	2448.63	2527.23	2567.76	2499.7	2315.64	2203.09	1853.45	2277.61	1957.77	1204.38	1662.28	2445.05	1915.93	2752.83	2884.76	2576.74	2581.87	2532.08	2676.47
PCHAS_0721100	27.205	49.4992	63.6734	40.9081	68.7958	12.8033	28.4538	33.6609	8.38081	16.4589	75.9162	31.2163	131.937	21.2823	31.4049	30.6881	24.5552	63.6616	33.3425	38.218
PCHAS_0721200	71.1512	71.1297	64.7649	64.7661	54.2038	81.1991	98.2053	134.13	73.7493	134.245	172.486	164.848	52.1861	90.0979	82.8508	65.8159	62.333	65.1103	52.4918	70.1722
PCHAS_0721300	334.639	234.357	33.7485	42.2439	74.3536	16.8467	54.0934	44.4587	50.3431	32.6421	240.585	126.212	300.22	2173.31	551.209	972.01	1518.24	851.712	183.42	71.453
PCHAS_0721400	251.891	318.165	343.002	274.856	312.477	178.849	251.182	242.809	163.899	215.765	393.045	223.061	448.222	309.488	369.402	309.202	280.913	343.01	275.684	295.29
PCHAS_0721500	38.8162	49.759	60.121	45.0875	48.7948	32.0775	31.7869	43.2546	33.2915	26.5589	57.259	43.8972	128.564	63.2618	59.2113	63.6423	67.2192	67.1976	53.6539	45.5758
PCHAS_0721600	0	0.290481	0.503709	0	0.171464	0.196782	0.201841	0.269924	0	0.505934	1.25949	0.387516	0	0	0.386144	0.153565	0	0.139779	0.161829	0.291959
PCHAS_0721700	3450.67	3269.65	3274.96	3522.98	3142.94	4051.77	3983.58	3957.5	3896.08	4355.73	2590.44	3778.24	1059.84	2221.24	1893.06	2075.3	1691.11	1815.49	2691.92	3340.14
PCHAS_0721800	1.75875	2.78505	1.56381	1.49012	1.56567	1.07811	3.8704	3.32737	2.46998	2.61787	25.9287	5.30772	9.52796	4.18153	9.69635	3.64579	4.71239	4.21194	0.738846	0.933076
PCHAS_0721900	225.737	212.194	204.111	202.657	193.919	146.46	154.553	131.658	104.316	104.598	145.012	86.0507	324.346	259.482	243.045	245.992	267.585	248.097	176.455	224.899
PCHAS_0722000	1808.36	1398.92	1143.22	962.248	1082.43	547.618	764.957	423.077	671.019	373.444	2198.84	738.52	4881.39	6570.28	3735.97	4310.92	6023.31	4274.31	1829.44	1288.28
PCHAS_0722100	769.596	726.117	700.005	809.637	574.823	1104.61	1072.03	1036.43	1363.61	1138.96	993.103	1057.43	178.643	580.169	519.314	420.533	441.869	360.985	440.011	701.361
PCHAS_0722200	2.79879	4.26476	1.83122	1.86694	0.599379	4.67759	4.6097	6.79363	8.02305	14.6202	182.14	26.5506	40.4846	78.9728	89.9883	16.8916	20.4456	13.1601	2.5645	3.40196
PCHAS_0722300	3.0332	2.4819	0.344299	1.85908	0.830171	1.0088	1.95449	2.22938	2.24114	4.41881	68.35	6.18049	16.0637	31.3015	34.7521	11.8961	14.4881	10.6689	2.48884	1.99562
PCHAS_0722400	805.143	745.423	781.223	822.541	788.356	817.149	730.552	648.334	797.93	633.727	307.518	531.556	389.277	369.504	524.665	592.549	547.073	570.37	825.434	817.788
PCHAS_0722500	14.9061	13.8712	17.3774	14.0241	15.1225	10.9311	12.9824	9.73296	9.58598	8.21759	7.47617	5.28713	8.79476	4.46283	10.3486	12.4214	8.2626	14.5756	8.51634	15.3645
PCHAS_0722600	10.8784	13.4287	11.0405	11.2706	13.7192	9.2243	8.80894	9.90415	7.1548	11.013	8.06936	8.26826	29.7214	16.2848	16.3531	27.5528	20.9739	24.8533	20.2987	16.2814
PCHAS_0722700	38.3248	36.2968	36.1962	36.7006	31.2361	38.5804	33.6279	40.2013	25.6579	37.8887	78.3282	39.1288	73.8002	61.653	53.4491	44.5796	59.5543	45.3998	33.0894	36.1131
PCHAS_0722800	26.9621	33.5818	38.9478	30.0698	42.5414	8.42028	18.1827	11.6513	10.1532	8.3557	7.47804	9.30907	9.73859	13.751	13.0445	26.0535	21.3081	28.8563	40.0902	36.4925
PCHAS_0722900	26.6432	37.398	36.6601	37.0304	37.5053	31.2806	35.2668	32.4464	31.3365	41.2088	21.9614	29.5272	6.29833	0	10.3994	6.254	3.87419	3.67262	11.2678	22.4379
PCHAS_0723000	5.07911	7.36025	1.37448	1.15662	2.6736	0.767092	1.18022	3.15664	5.75159	1.31481	15.6218	5.28713	8.79476	71.4054	16.1815	20.3532	29.458	20.7056	6.62382	1.70717
PCHAS_0723100	209.487	147.397	49.796	51.7898	76.5432	39.8191	56.4318	51.284	49.0004	35.6885	129.641	93.9777	193.415	1273.26	310.758	619.584	929.84	517.325	144.984	77.7941
PCHAS_0723200	80.1279	97.311	99.7455	78.4136	109.775	51.2726	60.8551	47.724	52.1737	39.5472	29.4072	28.8484	49.3369	34.0911	52.4619	60.5899	53.5123	77.0026	86.7405	75.5283
PCHAS_0723300	87.5188	101.464	100.554	96.4108	97.4455	58.6422	73.6085	72.9626	46.7947	72.7473	33.4754	52.275	40.9361	49.3261	50.8025	72.465	63.3403	80.0835	86.5745	94.4931
PCHAS_0723400	96.0358	49.787	10.0461	9.70859	21.9076	7.35873	11.9509	15.1408	14.5601	13.1386	57.4466	27.775	94.0355	528.016	145.603	275.645	392.87	230.427	48.4133	10.9179
PCHAS_0723500	94.302	95.8869	91.0934	97.2964	82.9385	105.904	115.663	147.326	107.16	115.748	109.022	156.204	28.8801	119.735	55.1087	56.2122	51.4039	48.4249	48.3067	65.8404
PCHAS_0723600	2.3577	4.67093	0.952898	1.30971	1.35154	1.48906	0.763672	2.21274	0.775337	0.957108	4.0433	2.44363	2.31186	2.88772	4.86995	6.6817	6.74109	5.02415	1.22457	1.74901
PCHAS_0723700	73.4526	65.6154	29.313	27.2633	42.6701	27.6244	40.1837	42.3703	34.5209	43.0445	138.817	90.0071	91.4157	350.651	135.025	187.747	241.805	189.801	61.1314	33.5336
PCHAS_0723800	61.3851	65.2247	80.5585	73.5004	81.7208	55.3032	58.4794	28.9358	53.4354	28.3396	27.2025	23.5777	44.9394	13.2679	53.7011	52.5009	50.197	69.2517	70.799	68.5173
PCHAS_0723900	33.6617	47.2024	45.8124	34.7216	45.1207	15.2724	20.8052	14.7298	18.787	14.9292	39.1556	13.6279	92.6795	49.9797	71.6445	60.1502	48.7254	68.8193	54.36	41.0698
PCHAS_0724000	0.627917	0.574954	0.3988	0.587282	0.20363	0.467393	0.47941	0.427413	0.389386	0.801124	1.26913	2.14765	1.11639	0	0.458581	0.243163	0.875556	1.43867	0.128125	0.809034
PCHAS_0724100	47.9095	55.219	52.0787	47.643	48.9245	28.1867	43.8284	51.6197	20.0474	58.3992	86.5831	61.1168	89.4927	62.8032	75.6106	67.861	70.0741	80.8854	56.2241	58.1138
PCHAS_0724200	22.8142	29.4563	22.6206	32.8818	27.1989	31.3575	34.7952	45.9454	30.9925	36.4017	35.1642	45.4714	8.98788	13.2679	16.2222	14.6825	13.3503	17.4142	16.6448	23.0506
PCHAS_0724300	714.797	671.23	706.968	738.045	696.094	543.392	580.202	477.709	468.16	464.355	369.366	396.954	623.674	500.003	666.53	725.554	705.447	698.99	729.584	801.867
PCHAS_0724400	4.09824	4.9352	2.31891	5.20363	1.31561	17.0399	24.1153	40.6818	23.9895	46.5832	97.0147	73.0591	12.6739	10.0391	24.3373	8.41623	5.6568	4.90284	2.1286	4.00026
PCHAS_0724500	215.549	270.068	265.321	256.715	324.787	227.878	283.156	359.019	258.733	317.493	331.482	388.492	63.4498	212.122	123.928	114.829	90.2543	121.169	188.473	212.035
PCHAS_0724600	86.726	105.447	123.887	114.091	137.857	74.785	102.398	107.663	99.1861	94.626	233.581	116.706	59.1495	139.557	90.6805	61.9395	44.9354	81.687	115.751	102.844
PCHAS_0724700	576.768	531.574	496.614	597.59	491.436	736.195	701.302	759.018	685.331	758.301	471.29	705.475	126.73	359.506	277.532	248.179	186.108	212.088	364.047	494.169
PCHAS_0724800	68.6267	84.5987	85.6782	93.0774	76.6316	73.7716	105.685	102.237	68.5703	87.2585	121.324	94.8496	18.3489	70.941	34.994	36.3975	30.2657	35.5119	43.1196	68.0687
PCHAS_0724900	26.8691	48.4455	43.1204	34.3243	42.4812	31.8702	50.591	71.8192	31.7665	46.1722	66.6698	54.5422	13.0498	8.82935	17.1237	8.29029	4.97513	10.7801	13.4167	25.8941
PCHAS_0725000	59.5947	82.9358	79.7047	80.353	95.3365	49.353	63.4982	65.0803	36.4508	61.1765	32.5119	52.3513	12.6995	8.59239	19.3207	25.548	21.9025	28.2376	52.0241	61.6283
PCHAS_0725100	39.7912	49.9014	26.6599	43.5852	23.803	68.1396	86.9116	142.258	53.2744	157.867	135.634	152.262	23.4013	71.8909	45.4648	25.9675	24.8013	22.9467	10.8153	20.4943
PCHAS_0725200	7.82237	10.7824	12.6393	10.7933	12.7929	3.5061	6.36834	4.85938	2.46454	4.38196	3.10258	6.04139	4.08257	1.69983	3.65499	6.0992	4.37859	6.95255	8.95037	10.5122
PCHAS_0725300	2.81523	4.63999	1.788	2.10644	0.912962	14.6687	26.5094	32.5768	32.2971	39.5098	97.5442	59.1488	9.00953	16.2554	22.6163	9.26677	9.15951	8.93104	1.14888	2.5909
PCHAS_0725400	96.0615	121.727	134.994	112.048	115.717	106.434	138.676	180.191	160.565	146.273	193.041	202.044	64.5865	44.6283	113.835	97.2764	88.0146	117.831	99.3573	137.285
PCHAS_0725500	0.580209	1.48756	0.343934	0.253242	1.02442	0.335908	1.03363	2.53419	0.419768	0.575755	4.10447	1.32299	0.481401	0	0	1.31068	0.629248	0.954414	0.552487	1.74432
PCHAS_0725600	22.2408	26.2866	11.7813	14.6644	11.4583	15.0679	14.3312	10.3342	16.4331	9.15675	14.9842	17.2641	18.0607	25.5019	21.5037	30.7864	29.7659	19.6547	10.3638	11.5843
PCHAS_0725700	28.9297	33.1011	17.6449	23.4797	20.6243	55.6444	48.9822	86.8645	63.8279	77.226	147.147	102.219	39.2778	135.291	63.1512	45.0441	66.1206	34.2161	12.9769	16.6348
PCHAS_0725800	27.8969	38.4725	41.1026	33.8907	45.6476	20.8152	30.5004	35.27	14.2081	27.4329	33.3829	33.757	12.7847	24.4235	15.6174	16.6533	19.3324	20.2524	26.1804	29.715
PCHAS_0725900	0	0	0	0.736277	0.425485	0	0	0.669811	0	0	1.13651	0	0	0	0.958208	1.52427	0	0.693717	0	0.724492
PCHAS_0726000	8.83324	13.3051	6.087	6.36144	6.18269	3.06837	7.86813	9.99602	11.9825	14.463	381.396	50.6054	129.173	151.736	255.518	43.1009	83.3444	34.0552	8.20092	9.10489
PCHAS_0726100	117.153	124.231	148.67	129.608	160.05	86.3733	94.273	74.8079	75.4173	71.6505	39.6257	55.607	47.2127	57.9817	63.8303	86.8476	72.603	106.385	141.38	135.953
PCHAS_0726200	11.6219	15.9475	19.9398	14.5747	19.3223	10.5191	9.62309	3.50974	5.68441	5.36026	4.96266	4.47889	8.14878	0	6.97348	14.1992	12.7817	16.9634	17.5351	21.9339
PCHAS_0726300	11.408	14.7703	7.87817	12.7468	6.96336	22.3895	29.1976	42.5793	16.5069	46.1307	54.8001	54.3658	6.05775	10.7589	17.2369	7.47343	8.16564	6.09881	2.55279	6.85931
PCHAS_0726400	76.4109	73.2554	74.0242	68.489	66.3405	64.0125	63.5857	76.7188	47.0668	60.678	58.738	66.3713	42.5101	48.9031	62.4884	70.3899	67.5267	69.2952	67.3319	69.4313
PCHAS_0726500	157.506	146.811	151.39	156.494	149.188	178.2	162.527	161.525	156.484	155.609	101.725	135.627	113.888	67.2482	115.773	125.533	119.994	122.132	131.893	144.7
PCHAS_0726600	178.17	173.069	182.074	181.051	172.037	198.747	178.374	195.795	181.916	181.161	150.386	145.911	226.115	141.999	194.572	173.465	172.273	201.855	162.37	187.853
PCHAS_0726700	20.332	26.0639	32.1131	25.2216	34.0088	7.43437	7.6255	5.09883	9.29038	2.38926	6.75898	1.83003	2.66361	21.6261	10.4854	17.0423	20.8899	26.404	26.7482	28.6094
PCHAS_0726800	27.3	35.7105	29.7234	27.9042	27.2974	40.6418	47.89	57.7389	40.8119	53.6971	55.1781	63.8371	7.28064	5.62972	16.8522	18.3123	10.423	15.2936	18.502	25.1246
PCHAS_0726900	3570.6	3319.91	3426.22	3329.33	3418.33	2888.79	2760.87	2329.97	2633.59	2399.82	1723.77	2063.98	3067.22	2311.58	3418.07	3920.15	3558.43	3467.85	4076.8	3754.63
PCHAS_0727000	109.523	97.566	97.62	100.005	84.0789	126.893	113.62	111.352	117.706	106.38	90.3153	96.1446	35.6447	58.9523	82.9248	85.366	81.9671	76.5573	94.8843	100.454
PCHAS_0727100	2.18118	2.3546	1.93942	0.901905	1.91107	0.199386	0.818048	0.273496	0.747489	0.170876	0.696085	0.392644	0.857239	0	0.195627	1.86716	1.12051	1.84117	2.29559	1.47911
PCHAS_0727200	22.2797	28.4401	35.6083	27.4497	35.2112	12.0823	17.4171	16.3492	10.4058	11.614	9.12023	13.1827	8.89176	11.3989	11.8545	15.927	13.7636	21.2239	26.5861	26.1625
PCHAS_0727300	50.064	44.8105	55.3146	32.9709	46.6249	34.4724	36.4141	30.3473	46.2933	26.4566	49.9953	38.5021	36.8683	11.9735	44.9283	44.5683	37.5891	47.5112	43.5818	53.4357
PCHAS_0727400	13.1165	13.7692	7.80577	13.6587	5.74405	24.8441	29.3466	35.8007	23.9853	37.2796	18.6828	28.0831	3.21343	4.17442	6.24791	4.12954	3.19226	2.48464	3.02412	5.58894
PCHAS_0727500	85.3549	93.1164	65.0287	98.4431	58.8604	128.423	140.566	185.246	99.8989	198.423	135.719	172.277	24.2412	87.7524	51.479	23.6255	26.035	20.7392	24.5425	56.7457
PCHAS_0727600	47.2333	42.2113	48.2378	56.5461	42.072	43.5964	52.8913	47.5834	44.5216	44.5941	30.0039	31.3871	18.1392	54.5458	20.6973	36.9484	26.3445	33.2984	29.299	44.8605
PCHAS_0727700	37.5149	42.2456	32.804	29.8532	35.2877	33.8384	31.016	27.1582	29.2405	20.9787	12.777	14.887	4.64314	33.5093	7.06392	18.541	15.51	13.2966	21.9072	29.6423
PCHAS_0727800	137.151	178.44	192.328	165.29	200.332	139.843	189.631	250.344	149.579	189.928	218.593	224.045	118.89	82.7379	101.161	83.2356	82.1416	119.538	130.598	150.336
PCHAS_0727900	567.116	568.053	561.912	578.162	571.055	683.391	619.82	617.147	796.336	612.51	740.614	725.899	426.712	626.424	626.848	583.463	538.21	519.768	584.143	615.773
PCHAS_0728000	16.0615	18.8454	20.2122	20.553	19.285	9.27951	15.0161	16.4444	5.18586	13.6825	7.7469	10.4422	3.88225	6.70645	5.03295	7.10661	7.77379	8.10626	12.229	16.1193
PCHAS_0728100	30.897	41.5194	8.90486	11.9974	17.5748	8.88212	14.8045	17.26	18.0368	15.5413	49.0972	26.9657	57.812	198.087	67.5386	89.8198	148.361	92.7975	22.8265	12.9036
PCHAS_0728200	0.88933	0.814318	0.564828	0	0.288404	1.32396	1.13166	2.42141	0.551495	1.70197	1.15553	2.17268	1.58117	10.2701	0.432998	0.860991	2.89349	1.72413	0.181466	0.982156
PCHAS_0728300	65.4079	81.0481	48.6348	88.0961	47.054	143.945	140.421	189.644	141.512	180.477	81.2332	124.127	23.554	42.0301	34.2002	14.5171	12.1798	10.7764	14.8528	37.5148
PCHAS_0728400	43.5302	52.4389	49.6778	47.4563	53.6724	25.8203	36.0046	26.2737	20.6674	22.5622	31.2258	21.6017	57.078	27.4911	44.8717	43.3284	43.6265	55.6217	48.2971	47.3226
PCHAS_0728500	5.7012	6.44959	6.02471	5.89267	6.45668	2.41513	3.73835	2.45449	1.15235	3.42457	8.26548	3.19951	11.7681	6.13129	8.4659	8.68683	9.25403	9.6693	6.78902	6.72673
PCHAS_0728600	173.393	197.898	209.081	189.558	219.705	107.606	114.379	72.096	104.736	69.393	60.3383	68.5369	95.1747	82.6451	113.243	142.727	127.731	171.033	233.352	185.997
PCHAS_0728700	7.39932	15.7317	2.80819	1.41785	2.59464	0.783619	1.60753	1.18237	1.5668	0.671572	12.2196	6.48125	13.0272	47.4135	20.1437	31.0653	31.7074	19.4818	5.79989	3.72042
PCHAS_0728800	6.74761	7.14554	1.04343	1.92072	1.99793	0.254771	1.3066	1.74733	0.63675	1.09171	6.67082	3.51198	5.84193	47.4311	12.4984	20.2795	26.2491	21.3544	5.02844	1.88998
PCHAS_0728900	24.1206	26.4057	31.4116	29.3476	30.2042	17.4247	26.9992	35.7248	13.2039	27.4834	31.3868	31.3936	16.4708	25.8829	24.0074	19.5289	20.8348	26.0711	21.647	25.8525
PCHAS_0729000	6.3242	6.7559	4.39767	3.71579	3.6811	3.23889	2.16663	5.02224	3.87151	4.224	6.14535	6.10092	6.86173	22.9398	7.73731	16.594	16.3554	12.8037	4.40072	5.01437
PCHAS_0729100	1.04412	1.3023	0.777846	0.683588	0.672631	0.0980252	0.326773	0.13446	0.183746	0.273029	0.926847	0.579113	0.87802	2.28119	1.37052	1.85505	1.974	1.49704	0.806139	1.10896
PCHAS_0729200	38.9978	41.7101	45.3287	40.6049	45.108	20.1974	26.6805	23.8567	16.5715	24.3905	27.0652	22.0967	67.1009	16.6169	48.2403	51.7427	50.2558	57.1693	45.6352	47.7492
PCHAS_0729300	193.52	196.057	209.272	211.071	208.056	130.507	148.819	107.009	99.311	97.8916	86.1181	79.4462	184.248	118.769	172.636	208.053	208.51	197.834	219.649	214.543
PCHAS_0729400	409.049	501.746	414.371	406.808	386.796	401.36	489.265	621.763	325.749	772.187	978.34	703.705	781.032	531.126	656.747	489.285	479.454	540.431	399.516	447.581
PCHAS_0729500	72.1476	85.1679	97.3802	79.518	102.509	45.9763	49.0077	70.4847	65.3404	47.9008	36.1935	65.6856	15.5036	62.9374	31.842	42.2106	20.265	40.9827	78.5854	58.851
PCHAS_0729600	298.474	257.978	256.488	286.349	253.96	242.929	206.015	157.377	229.261	162.997	69.2062	111.588	74.7759	169.73	143.67	200.523	213.348	196.868	276.37	278.436
PCHAS_0729700	0.59705	1.31206	0.417116	0.89346	0.35497	0.592557	0.759739	0.609603	0.370245	0.44435	24.8675	1.89622	6.3691	13.7897	9.59285	2.3121	3.60757	2.3676	0.670046	0.659369
PCHAS_0729800	66.6309	68.6011	67.4095	63.5457	63.5196	42.1445	44.8637	33.2793	28.7528	26.9423	71.8431	26.9169	136.142	74.2199	111.98	93.8663	105.406	98.8705	80.7455	74.0202
PCHAS_0729900	118.033	77.8488	16.8489	13.7512	28.5043	9.91308	22.3695	17.1331	16.352	12.5735	95.5181	39.8238	140.363	682.847	182.852	369.78	508.815	323.627	74.0229	30.5921
PCHAS_0730000	5.71744	7.92354	1.64878	1.21401	1.75391	0.536769	2.47756	1.47256	1.67694	1.61006	25.9228	7.92781	8.07724	37.4742	17.1161	16.127	27.1489	17.1576	5.51784	2.19007
PCHAS_0730100	2.65251	3.57926	3.10331	2.742	1.16202	2.66719	2.98446	0.83149	1.81803	1.66241	3.95035	0.477491	2.77995	5.64266	2.8548	5.86582	4.99637	3.27243	2.59225	2.87798
PCHAS_0730200	13.3196	19.1004	20.4749	14.4847	15.3744	4.70521	11.6633	9.68113	7.34985	6.38467	10.2666	3.86076	5.61933	54.7485	6.92475	10.0976	11.7522	17.8252	13.8656	18.6159
PCHAS_0730300	72.2536	97.7372	107.601	74.2942	109.682	66.2107	67.1232	104.021	58.6879	85.7749	354.342	124.322	516.371	143.332	232.656	155.609	191.815	176.093	108.267	89.6678
PCHAS_0730400	20.8151	21.7316	23.0873	27.2553	19.4851	22.7349	21.7903	24.7948	25.1505	20.4424	16.4814	18.3488	5.34134	26.0201	9.87327	11.0523	8.37811	7.94221	12.5666	13.5477
PCHAS_0730500	15.3012	17.7827	17.2683	18.2007	15.1832	10.8542	15.7762	18.2268	8.69794	18.9797	10.9319	13.4191	6.41749	6.7962	8.11846	9.83779	11.3061	10.3376	11.0077	14.2625
PCHAS_0730600	20.6405	25.0829	26.0971	20.6216	24.8269	13.8838	20.192	17.7651	9.58127	14.9176	18.8093	12.2422	11.285	28.9339	15.8584	14.0688	13.1981	21.3431	21.8129	22.2899
PCHAS_0730700	1066.24	957.242	998.296	1077.79	938.742	943.028	977.451	1113.58	673.273	1050.08	529.677	913.339	548.81	658.54	710.343	846.338	786.205	782.629	905.789	1040.36
PCHAS_0730800	3.59873	2.88329	1.79992	0.589022	1.36155	0.781297	1.60277	2.94717	2.44088	5.69144	85.2382	10.0008	21.8342	54.5458	30.2794	16.4622	15.3676	10.822	2.24883	1.44898
PCHAS_0730900	69.2518	84.3362	83.3647	64.8699	80.8198	33.7705	35.1133	43.4672	34.108	35.6817	94.4799	35.5291	186.298	183.015	112.11	118.051	138.655	138.67	98.5342	74.4701
PCHAS_0731000	3.93821	5.69876	4.73621	4.05543	5.04073	1.41437	3.51982	3.92787	1.33285	4.8088	7.55508	4.56603	3.48907	1.07916	4.50436	3.61885	3.5182	5.35271	5.09117	4.40333
PCHAS_0731100	60.9244	81.3645	77.5126	49.7629	59.1452	31.6425	40.1338	20.3018	44.2192	20.9946	496.515	74.3731	505.167	285.046	469.028	193.829	264.507	194.554	108.566	91.1177
PCHAS_0731200	245.602	248.126	224.019	218.065	204.204	267.938	357.962	528.219	202.124	489.623	860.525	721.204	666.922	403.985	590.143	366.895	408.848	406.498	237.084	253.742
PCHAS_0731300	11.5264	12.6808	12.3139	12.84	9.69818	13.147	11.9527	14.2425	12.882	13.0597	19.6458	17.9465	19.6979	17.3836	18.3227	13.291	15.3925	14.857	5.1602	14.5186
PCHAS_0731350	1243.08	1199.51	1175.82	1153.01	1455	2123.49	1868.98	2159.85	2166.75	2691.51	3123.69	3100.79	2833.48	1803.35	2137.31	1925.06	2074.63	1945.67	1737.47	1366.1
PCHAS_0731400	9.87991	13.6784	13.7044	10.8669	11.6625	6.1775	7.74439	4.86448	4.00282	4.70595	94.1208	15.7696	120.01	74.5419	75.8751	22.6756	38.1452	34.6167	13.171	17.9913
PCHAS_0731500	1.6869	1.70721	0.789438	1.86007	0.604637	4.3177	5.85221	5.39374	4.23941	7.00418	7.53685	10.021	0.883976	3.58854	2.11814	0.601687	1.44433	0.438137	0.380441	1.37272
PCHAS_0731600	0.801697	1.02771	0.712839	1.31218	0.606633	2.78482	1.42821	2.1487	0.435007	3.57994	3.84838	6.16956	1.99551	8.10086	0.683079	0.271653	0.652092	0.494531	0.858817	0.516469
PCHAS_0731651	10.3124	30.1113	22.9235	13.5031	14.3059	7.96039	9.18568	2.7298	4.97386	2.55831	143.586	23.5142	206.775	69.4687	72.2453	17.8599	31.688	57.9581	16.3661	16.2396
PCHAS_0731700	3369.53	3599.92	4307.07	2879.03	5628.79	1341.39	1780.95	912.536	1267.71	1077.21	2287.67	1150.33	8698.97	4403.53	6189.59	7682.79	7567.26	8658.53	8244.1	5067.22
PCHAS_0731800	0.585806	1.50191	0.173626	0.255685	0.147757	3.39148	1.73934	2.79124	0.847635	3.48785	5.92008	5.34299	0.972089	0	1.33102	0.264665	0.635318	0.240905	0	0.503184
PCHAS_0731900	2.41305	2.57777	2.682	2.89635	2.58673	2.79404	3.58235	10.7791	3.05514	9.27881	5.28364	7.56555	1.00106	8.12768	1.02801	0.272552	0.654251	1.24042	0.574441	1.03636
PCHAS_0732000	3.52617	3.76688	4.52883	7.43878	7.55992	5.44388	6.63081	10.0342	4.67703	9.33094	9.10674	6.70028	0.487612	0	4.00593	2.12415	2.54947	2.6585	4.47693	4.03846
PCHAS_0732100	5.54177	13.9121	1.23188	8.46579	0.524172	71.3862	85.5622	139.453	108.754	146.761	305.691	267.731	15.5183	74.6634	69.2533	20.03	13.5228	10.2554	3.62793	5.9502
PCHAS_0732200	101.841	97.1388	80.2796	52.7774	45.9524	38.2697	55.0508	46.0925	38.4924	43.9968	280.788	92.8256	589.925	423.574	471.184	454.166	604.117	525.776	154.291	144.719
PCHAS_0800001	0.731669	1.25058	3.68658	2.23544	2.21457	3.81235	2.60691	2.03364	2.11739	1.81513	18.9783	1.66834	49.7796	9.85767	20.7804	11.2392	15.8702	9.62846	4.87698	3.14237
PCHAS_0800005	0.194021	0.248718	0	0.254051	0.146813	0	0.69129	1.84894	0.842219	0.577594	2.3529	3.98164	0.482939	7.84204	1.32251	0	0	0.239366	0.277126	0.249984
PCHAS_0800011	0.207265	0.531391	0.184292	0.271392	0	0.359983	0	0.740678	0.899708	1.54255	2.30405	1.41781	0	8.37733	0.353196	0	0.674347	0	0	0
PCHAS_0800015	0.19911	0	0	0.782144	0.451991	0.69164	0.709422	2.13461	0	1.48186	1.60975	0	0.495606	0	0.6786	0.269871	0	0.245644	0.284395	0.769624
PCHAS_0800021	0	0	0.499977	0.736277	0.425485	0	0	0.669811	0	0.836977	1.13651	0	1.39963	0	0	0	0	0.693717	0.803153	0.724492
PCHAS_0800025	2.12616	1.02208	1.06341	1.392	1.00552	3.92358	2.60406	4.1156	2.59577	6.13173	2.82014	2.72703	0.661531	0	0.90579	0.360222	0.864699	0.163942	0.949021	0.856073
PCHAS_0800031	0.213083	1.36577	0.568395	0.558021	0.644946	0	0	0	0	0.31717	1.72271	0.728802	4.24308	8.61249	1.45244	0.866429	1.38655	1.31441	0.608705	0.823633
PCHAS_0800035	0.461375	0.369652	0.358958	0.453094	0.349116	0.600998	0.513708	0.824383	0.625865	0.858438	0.349695	0.789017	0	0	0.491389	0.312671	0.375278	0.142301	0.247124	0.297227
PCHAS_0800041	58.5356	61.4141	63.2971	60.7429	46.2077	55.6674	57.3991	77.966	54.9197	63.0244	53.7001	68.0823	35.2706	34.0911	42.257	36.8112	36.2237	41.4149	27.4678	55.8583
PCHAS_0800045	243.547	261.118	267.175	211.22	245.558	132.943	194.962	97.2063	160.64	107.342	451.336	140.636	969.942	255.683	598.281	416.698	627.74	544.742	347.866	279.563
PCHAS_0800051	0.203105	0.781092	0.722375	0.531893	0.461061	1.41104	2.17097	2.90326	0.881654	1.5116	3.48935	2.08403	0	0	0	0	0.660815	1.00229	0	0.261689
PCHAS_0800055	1.38244	2.15192	1.49262	1.93946	1.79327	3.25858	3.69418	7.17515	4.71506	4.85038	5.5883	6.75475	0.983154	7.98231	2.35579	0.803032	0.963823	0.730941	0.564166	0.636139
PCHAS_0800100	75.0416	96.4591	109.086	66.6666	90.2029	33.3827	43.7119	32.6381	43.9358	34.0878	730.673	114.694	1559.95	173.555	590.953	259.958	342.612	307.001	177.862	84.5679
PCHAS_0800200	0.384358	1.47814	0.170878	1.00656	1.74503	1.66891	0.342363	3.20492	1.25133	2.00239	3.49585	3.28653	5.74025	0	2.9474	3.12573	1.8758	1.65965	0.548991	0.990444
PCHAS_0800300	18.5131	26.0695	31.3011	19.099	27.0621	6.33338	12.9924	6.34851	6.6969	8.14168	18.0004	4.31727	38.75	28.3436	26.2899	18.6292	20.0778	24.9162	23.0373	19.6968
PCHAS_0800400	202.236	180.367	168.345	176.388	144.223	200.743	181.885	200.409	166.072	210.975	262.488	199.432	304.328	246.853	314.191	240.529	291.314	239.834	174.962	204.298
PCHAS_0800500	4022.78	4090.83	4626.81	4059.26	5200.41	2828.26	3015.27	2069.26	2958.22	2229.95	2752.32	2010.08	7436.09	4077.74	5626.66	5804.24	5575.37	5973.18	6304.78	4848.67
PCHAS_0800600	103.848	114.406	112.349	102.575	88.72	90.5564	100.23	103.342	84.0807	93.5899	527.951	136.612	857.143	201.364	483.913	252.171	328.934	258.463	130.417	125.059
PCHAS_0800700	3032.27	3321.9	1957.97	3883.31	1474.88	9070.86	9093.62	11917.2	11230.7	11696.7	10729.1	13649	1213.42	3429.66	3440.57	1026.07	814.695	649.662	507.373	1684.95
PCHAS_0800800	3.24569	3.61324	1.29108	3.57887	0.581676	7.12068	7.15159	11.904	5.19072	7.88242	5.86957	4.67418	2.12602	3.45226	3.63877	3.24149	5.00212	1.58062	1.34198	2.42109
PCHAS_0800821	4.99139	0	2.21908	0	0	0	0	0	0	3.7148	0	0	6.21205	0	0	0	24.3596	12.3159	3.56468	3.21555
PCHAS_0800841	2.16888	5.56063	0	0	0	0	7.72763	0	0	0	8.76736	7.41817	0	0	0	8.81901	28.2263	2.67577	0	0
PCHAS_0800900	138.728	172.839	157.039	161.225	176.221	247.721	263.023	350.416	310.775	309.328	484.779	474.49	67.9526	225.189	131.02	84.5762	56.1936	82.4824	119.368	136.391
PCHAS_0801000	11.4701	14.0375	12.8393	13.3178	12.4993	13.6035	13.8871	20.5611	9.74858	23.1509	20.6322	21.3295	3.69584	9.00205	6.07256	6.1884	5.91785	7.05251	8.69526	11.0959
PCHAS_0801100	36.5053	44.1726	44.5935	38.4188	41.0474	29.6278	47.4077	46.3299	28.8791	38.595	36.8919	51.3437	41.6114	27.5793	40.1156	39.3057	36.6307	53.4552	40.4464	46.1558
PCHAS_0801200	18.0189	22.762	17.9369	23.594	21.4657	23.4491	29.48	42.6153	14.4806	38.0028	35.6231	45.2791	7.45338	19.1099	10.8321	7.90354	6.66589	9.20316	11.6304	16.1093
PCHAS_0801300	98.4787	90.9989	97.0497	101.547	97.1832	78.3937	75.2922	66.4742	73.0283	59.2444	54.3221	57.5409	76.6013	66.3394	103.486	105.113	97.4569	106.308	107.84	99.3924
PCHAS_0801400	6.71815	11.1051	9.27469	7.06055	8.09351	4.29884	3.77945	3.68542	1.91859	2.76312	3.30531	2.72107	2.42032	7.14573	3.61525	6.23022	6.03968	6.21619	5.93421	6.71974
PCHAS_0801500	144.701	158.866	170.731	159.999	154.488	71.5943	107.715	101.99	46.4263	100.729	72.6111	82.5199	137.245	103.463	113.464	144.682	132.967	158.047	148.728	148.302
PCHAS_0801600	1.38544	4.14404	0.615942	1.2094	0.524172	2.80732	6.99307	7.4265	9.02103	12.717	80.0397	28.4316	10.3455	18.6658	25.5765	7.19828	3.75635	5.12771	0.989436	4.76016
PCHAS_0801700	408.886	419.099	365.925	367.481	363.381	389.132	414.366	475.124	434.452	408.087	457.009	457.766	550.339	655.343	509.897	491.867	531.366	474.624	383.595	417.814
PCHAS_0801800	2.91109	6.42693	1.29422	0.952945	1.16258	0.702231	0.576228	1.73384	0.526527	1.44437	6.70102	3.31891	6.23962	26.1471	9.64588	14.6866	17.3642	9.37766	3.8115	1.45863
PCHAS_0801900	5.53356	6.79298	6.19895	5.09652	5.93774	1.9819	3.78724	2.81165	1.1196	3.37376	5.30781	2.29896	12.9955	4.42263	7.7515	7.86031	8.44245	10.1438	6.34088	6.12265
PCHAS_0802000	5.83967	6.9921	7.31987	6.15966	7.19589	2.32433	3.46776	3.40564	1.49631	3.56141	2.62289	2.98213	3.63389	1.6391	3.04067	5.05682	4.42007	6.6041	5.82132	6.29618
PCHAS_0802100	5.45969	12.4095	1.82979	1.37479	2.43109	0.437656	1.90786	2.65145	0.592495	3.28192	34.6117	7.97222	14.7397	44.1345	15.7091	17.9877	21.7943	19.7407	4.25904	2.16446
PCHAS_0802200	36.7483	40.7812	43.6464	40.1805	43.5574	19.2874	26.2821	24.667	14.4383	20.0431	15.6682	15.9635	28.5762	32.5251	26.0545	35.4111	30.3707	38.5859	40.6884	37.7401
PCHAS_0802300	0.940271	1.78724	0.490101	0.509458	0.196273	1.01364	2.77254	3.93948	2.39266	7.04616	51.0829	12.7531	5.64933	24.8994	15.8572	3.55962	4.21962	3.20006	0.370488	1.16971
PCHAS_0802400	19.6095	33.4194	30.0062	31.5484	29.1013	20.7254	37.642	50.0673	16.0016	40.8411	53.3064	55.8916	24.2158	15.3602	18.3918	16.4828	16.3211	21.8482	19.6496	24.0905
PCHAS_0802500	0.981754	2.15747	0.332548	0.367289	0.353752	1.86753	3.58124	4.45509	2.63817	6.68035	56.0328	13.1117	6.86561	15.1166	16.9689	3.61179	5.93208	4.3834	1.00162	1.08423
PCHAS_0802600	83.4173	95.5231	88.216	91.0339	86.5406	47.183	71.6603	92.5938	25.3357	90.658	59.163	70.796	69.0347	62.4771	60.6447	72.4855	67.2872	87.2184	81.1321	86.967
PCHAS_0802700	7.00141	8.27502	8.8745	8.3224	7.96559	5.26082	6.10375	7.80771	3.01766	6.06073	3.81377	5.2649	2.71915	12.042	4.56931	5.04768	4.52359	5.45218	4.32639	6.9736
PCHAS_0802800	0.596974	1.3914	0.675573	0.639555	0.451722	0.659809	0.870135	1.29293	0.706741	1.69639	23.0897	2.7843	6.61915	4.38706	10.0805	2.13317	3.35486	2.34339	0.697645	0.769166
PCHAS_0802900	56.1556	61.2004	68.3102	63.9497	76.5412	45.4306	43.6658	46.1928	44.8621	38.9346	29.9463	37.5377	18.212	14.7865	21.8194	29.503	23.2101	30.6907	59.3075	59.1552
PCHAS_0803000	28.5604	33.9914	38.1191	34.7202	34.7146	19.8419	29.671	29.4372	14.6163	27.5656	21.4497	25.7065	20.0549	43.7446	22.1318	28.5235	24.4534	31.8231	29.1998	32.1502
PCHAS_0803100	4.57643	4.65603	4.26297	5.42168	5.05697	4.54199	4.78817	5.79755	3.9416	6.05507	22.0233	5.71447	4.88196	26.4247	9.16029	5.90747	6.85398	4.12247	3.52772	4.86692
PCHAS_0803200	9.0592	12.4301	14.6125	11.6833	15.7768	5.37654	6.89346	3.57902	2.07493	3.25254	2.76034	3.58118	2.71952	3.68	5.89578	7.83618	4.14719	9.49155	13.5248	12.4348
PCHAS_0803300	11.191	14.2455	6.40177	10.4521	5.62562	25.5533	33.0416	51.2716	27.5165	54.0497	93.0063	72.0021	15.1939	41.1202	27.7386	16.4409	14.5132	11.4892	5.03006	8.16734
PCHAS_0803400	125.564	142.441	69.323	131.089	57.5515	324.578	335.405	480.517	292.746	581.335	445.018	565.178	60.0623	145.258	156.73	66.0077	63.475	40.8992	28.9135	69.4567
PCHAS_0803500	40.8599	49.9692	47.7296	49.9124	47.118	34.5991	52.512	70.8779	19.9468	85.1083	78.9967	89.1201	18.9112	26.3818	31.4998	30.0792	23.8698	34.8517	36.8069	40.3672
PCHAS_0803600	22.1049	25.3336	36.3722	25.8768	33.453	6.67696	11.6641	4.79402	4.43269	4.73873	3.88504	5.54712	8.37285	9.71141	10.9526	14.9804	12.7032	18.9712	22.1356	29.2548
PCHAS_0803700	4629.72	4567.6	5054.17	4632.28	4766.52	4115.45	3825.88	3526.23	4742.66	3459.61	2811.93	3130.74	5117.45	2499.19	5454.68	5381.63	5133.59	5338.5	5590.82	5057.48
PCHAS_0803800	588.262	620.446	545.505	681.172	533.436	900.351	851.808	1000.99	997.289	969.28	747.55	1011.02	138.411	251.371	271.808	187.431	158.305	130.887	276.943	446.374
PCHAS_0803900	165.556	171.052	174.755	185.153	189.015	125.762	142.133	157.355	86.475	161.191	95.5335	123.745	60.9814	76.0173	82.1482	95.9286	84.2187	99.9564	139.619	162.612
PCHAS_0804000	17.4625	21.5427	21.7744	19.9602	21.4838	22.8363	26.1317	38.2255	15.9631	44.9521	49.7035	46.6572	5.21594	18.268	15.4039	9.46741	9.49151	8.5668	11.8549	15.3526
PCHAS_0804100	146.463	97.6926	130.229	152.799	152.274	153.042	116.672	129.077	170.574	106.345	110.709	130.327	29.6392	192.514	50.7287	43.5763	69.7355	55.8238	93.5437	87.4504
PCHAS_0804200	4.87328	8.16932	5.33309	6.38107	3.9712	2.60432	1.33564	7.59119	7.32263	9.48574	118.576	11.5394	43.855	60.6064	70.2686	18.2913	24.3931	12.9494	6.42522	3.38096
PCHAS_0804300	3942.13	3736.74	4002.21	3832.25	3841.23	3467.07	3289.81	2867.14	3470.92	2930.5	2145.36	2622.04	3361.28	3061.6	4009.27	4190.77	3970.8	3816.16	4424.7	4253.84
PCHAS_0804400	238.227	247.803	249.01	238.554	239.83	140.794	167.764	157.075	105.429	185.339	112.468	129.325	200.986	191.035	189.511	228.145	203.787	246.668	249.443	252.595
PCHAS_0804500	13.8019	16.3823	22.0899	16.7336	21.8158	9.58865	9.28877	5.84562	5.99124	4.56533	2.06638	6.64388	3.81717	0	4.35549	6.65137	6.65265	7.82009	14.6028	17.783
PCHAS_0804600	1.84888	3.00821	1.26458	1.11735	1.61425	1.11156	1.14014	1.18589	0.926046	0.423389	3.01827	1.21609	1.77002	5.74838	3.15064	5.49381	5.32134	3.42147	1.0157	0.916219
PCHAS_0804621	4.99139	3.19927	0	0	0	4.33459	0	2.97286	5.41674	0	7.56635	0	0	0	17.0115	0	32.4795	15.3948	0	0
PCHAS_0804641	0	12.9748	2.2499	0	0	0	0	3.01415	0	0	2.55715	8.65453	6.29833	0	17.2477	20.5777	8.23266	12.4869	3.61419	0
PCHAS_0804661	2.49569	0	0	0	0	0	0	0	0	0	5.04424	0	0	0	0	3.38263	0	3.07897	3.56468	0
PCHAS_0804681	0	0	0	0	0	0	0	0	0	0	2.52212	0	0	0	0	0	8.11988	0	0	0
PCHAS_0804700	49.757	45.895	41.5892	51.7938	37.4077	53.044	56.4652	65.8814	33.8396	79.3152	40.0066	64.0792	11.0196	27.2297	22.9059	23.5236	24.1109	23.3511	30.059	39.2259
PCHAS_0804800	10.7607	13.5211	4.54716	5.71971	1.85422	13.5082	10.0595	17.5138	29.5988	40.122	654.522	99.8459	150.895	292.825	353.67	60.3612	90.126	49.0276	7.30446	10.0209
PCHAS_0804900	80.8157	102.042	109.574	86.3687	108.801	33.2652	47.7687	27.9342	22.5086	24.893	45.4149	23.6468	111.858	45.3149	81.9931	89.0223	85.417	115.84	98.6173	101.839
PCHAS_0805000	45.5143	62.6306	68.9736	53.199	69.4313	21.5863	34.2808	35.2253	13.3947	32.7892	71.0732	34.4471	158.414	60.6278	67.4086	66.0461	62.8866	92.4754	65.6828	58.6976
PCHAS_0805100	82.1483	89.6166	101.716	89.9971	92.9735	73.9961	86.3817	87.2001	68.458	72.8754	46.6233	68.4311	16.4049	19.0276	33.2922	48.1741	37.5256	49.3669	76.6544	81.8844
PCHAS_0805200	91.856	98.8637	98.1398	101.244	95.8723	65.4753	78.3911	75.3439	45.8084	70.1414	52.4509	62.8801	46.9174	56.3341	56.4369	71.7858	58.3034	77.9511	86.8353	94.9203
PCHAS_0805300	47.026	61.2401	62.0095	62.3438	60.8396	42.5975	52.8111	53.4132	26.3846	53.0139	32.7602	47.4137	14.0676	15.0851	19.1709	18.5723	17.3471	26.706	36.6305	47.057
PCHAS_0805400	184.988	219.174	244.027	222.344	241.074	144.42	178.092	166.659	125.724	159.232	185.531	137.407	356.388	188.812	290.16	232.37	253.819	296.516	222.523	233.231
PCHAS_0805500	15.3302	18.9875	20.4137	18.2309	22.3037	10.8048	11.0826	10.2334	8.67999	8.81888	5.46356	8.61231	2.2121	5.98673	3.02887	4.41667	4.33721	5.84753	11.0012	16.2215
PCHAS_0805600	40.0926	83.8953	86.5009	84.9221	102.166	26.6248	52.5179	66.0187	28.153	43.0027	73.2883	54.4479	132.081	0	45.2125	43.9523	51.7938	89.4693	60.6341	59.2536
PCHAS_0805700	189.994	194.622	268.445	215.834	257.334	150.679	148.371	194.283	111.095	174.33	164.826	154.298	269.928	245.456	183.319	152.863	180.648	229.046	201.981	220.204
PCHAS_0805800	9.85289	10.168	11.7913	11.2786	10.6441	4.52036	7.39645	5.01948	4.8419	4.3352	3.3817	2.75532	2.62216	7.51396	3.90714	6.13131	5.84687	6.03959	7.52341	10.2996
PCHAS_0805900	88.7571	108.123	126.687	102.286	121.951	62.654	66.1142	63.6836	57.4544	51.3775	34.8821	42.6069	40.0509	10.4896	54.839	72.8134	69.2388	77.8031	89.3353	102.655
PCHAS_0806000	1908.24	1841.63	1998.51	1930.57	2049.66	1086.89	1203.24	812.167	927.397	815.044	506.273	573.644	1351.44	1074.29	1492.53	1799.32	1580.12	1696.94	2078.53	2079.13
PCHAS_0806010	9.73948	18.3606	19.3576	12.7529	20.3751	6.96534	12.2476	4.77714	4.97386	5.96938	12.1585	7.83806	17.1124	0	7.8103	11.6477	20.504	24.0314	10.638	12.5487
PCHAS_0806100	83.6331	85.6606	98.2793	79.518	87.1347	75.183	77.1159	69.5862	61.1148	69.1245	55.4255	60.3721	62.2423	59.453	83.7918	106.52	95.0317	102.401	94.244	100.446
PCHAS_0806200	16.4717	21.671	8.01677	13.4516	6.39595	53.1516	63.8619	86.6423	55.6018	129.622	156.386	147.664	15.5368	68.3282	46.0186	22.443	20.3084	14.0645	5.88176	9.38271
PCHAS_0806300	84.8691	90.4207	78.8163	66.6766	62.2213	64.8574	75.9324	76.3834	72.8624	68.497	80.431	55.475	138.954	106.72	93.2021	99.6932	114.132	114.011	78.1203	73.3852
PCHAS_0806400	35.9052	50.5733	53.0779	45.5632	53.0521	16.8093	27.1125	26.3133	18.2798	23.753	37.4053	30.0697	84.5907	26.8747	51.2397	54.3732	45.9106	73.5543	48.5409	46.8328
PCHAS_0806500	227.732	216.247	217.49	237.818	248.058	270.524	293.507	263.906	274.598	236.865	134.108	213.478	27.9926	22.7274	70.9074	90.6943	34.7601	57.5785	140.552	191.266
PCHAS_0806600	0.992744	1.44815	0.882711	0.941306	0.880712	0.535105	0.792801	0.978664	0.817294	0.917183	1.59137	1.17085	1.61896	8.30178	1.69172	3.06229	4.12097	2.91408	0.977909	0.882132
PCHAS_0806700	94.6266	107.21	104.388	108.48	105.275	83.4254	95.8293	118.487	67.608	106.173	98.0093	126.237	40.0704	84.64	66.4633	86.2134	75.3714	85.2555	100.2	98.3123
PCHAS_0806800	92.3831	106.739	118.856	125.922	120.414	62.1496	82.4427	50.8221	55.262	46.3491	28.5126	41.7771	23.5518	48.674	40.7496	48.5004	47.0171	56.6687	84.0376	107.947
PCHAS_0806900	36.015	42.6772	51.334	44.9294	42.3463	19.747	24.3784	16.4629	14.9244	14.998	10.5955	10.7114	15.2516	24.7657	22.8552	32.02	32.5615	38.6366	38.0219	39.298
PCHAS_0807000	5.92248	7.40612	5.13704	7.30584	5.24999	3.84879	6.29758	7.55763	2.54797	9.71868	5.43866	6.58676	2.16693	4.26509	2.13536	1.59115	2.01704	1.00893	1.97823	4.41871
PCHAS_0807100	6.41357	12.204	2.94046	1.70583	3.33648	1.04431	1.78526	2.38745	1.30502	2.83412	9.01331	6.85507	11.2247	36.4538	14.5154	24.8562	28.692	17.6795	3.72154	3.61529
PCHAS_0807200	19.2727	23.8769	22.5421	26.506	20.9942	19.5449	22.1213	28.1963	12.0718	24.259	11.5031	18.3598	4.34645	7.84204	5.06963	4.38289	3.57713	3.5107	7.75954	14.9991
PCHAS_0807300	108.275	115.525	114.546	113.868	100.785	84.3161	103.031	104.497	62.5342	111.934	67.966	81.3556	90.6435	58.4925	74.9694	88.0169	78.0747	101.475	91.8517	104.688
PCHAS_0807400	47.9436	55.2161	60.0875	50.2219	65.3008	18.2401	34.4354	31.5466	15.1958	24.9205	25.533	24.4669	59.8578	43.0624	42.5358	53.8424	53.4813	70.4149	65.2184	54.1244
PCHAS_0807500	22.1839	23.8168	2.71221	2.17857	8.60297	0.963243	4.44603	4.29413	0.60186	2.06378	27.1828	7.58753	31.7505	156.912	27.4074	66.1493	95.6342	62.6056	15.4469	3.21555
PCHAS_0807600	62.5914	62.2074	62.6935	63.4192	56.4538	39.7958	46.1287	34.2836	29.5151	28.2826	12.519	21.6629	9.50545	15.0586	18.7292	20.3252	21.8191	22.0628	41.2417	55.5636
PCHAS_0807700	73.5135	111.993	122.205	107.419	138.462	43.4854	63.5835	61.2348	39.889	46.3862	33.1083	40.9951	47.7347	43.0624	48.1121	54.1518	51.1291	85.7654	90.9254	95.7473
PCHAS_0807800	31.1663	35.9377	33.1004	36.5749	32.8892	24.4119	30.4828	38.9451	17.7954	41.5014	20.7145	28.0428	6.97173	21.6125	11.3683	11.9066	11.5154	11.7801	19.7121	28.0173
PCHAS_0807900	3497.89	3327.32	3476.51	3294.6	3318.79	3235.87	2928.39	2453.29	3504.28	2485.82	1934.72	2410.45	3133.3	2363.65	3643.75	3873.69	3724.82	3462.57	4034.51	3745.62
PCHAS_0808000	3.11101	4.2612	1.74308	2.39949	2.12832	6.80962	7.81982	14.0618	6.28975	18.269	29.3291	23.1759	6.25855	15.5025	9.73136	5.54515	6.23949	5.99372	1.52176	2.36108
PCHAS_0808100	7.82392	10.9848	6.40462	9.59419	5.54436	15.0987	21.0179	37.2793	13.2077	29.0221	62.1246	44.6	7.10977	10.0391	11.0047	6.22801	8.48519	5.97533	2.48337	4.32028
PCHAS_0808200	35.3068	36.4959	37.2657	34.5068	33.6835	23.5288	30.8082	38.2752	14.6095	49.0564	69.3933	50.3887	62.2237	44.4883	52.8795	53.3342	48.5523	49.9825	38.3968	40.718
PCHAS_0808300	5.39306	14.3497	3.14314	6.8243	3.01777	22.197	46.9886	94.2574	29.3124	96.9369	227.991	161.207	20.0794	34.8034	40.2362	11.2409	6.78273	10.4555	2.8482	4.61296
PCHAS_0808400	0.0711107	0.182316	0.063229	0.0931124	0.322851	0.370522	0	0	0	0.211694	0.143727	0	0	0	0.121179	0	0	0.17546	0.10157	0.274866
PCHAS_0808500	325.006	390.475	388.868	418.962	419.202	361.033	372.881	400.012	310.502	339.065	197.699	318.541	79.4635	116.422	114.94	131.112	96.8395	132.075	243.422	311.125
PCHAS_0808600	58.4195	60.6806	71.0386	59.1094	66.9193	32.4847	40.93	41.5334	29.0678	35.4013	47.2537	35.5395	66.6713	60.664	48.0051	52.1093	45.4518	69.3665	53.5944	58.4607
PCHAS_0808680	16.0102	36.0935	37.3074	28.1927	30.9135	18.2184	40.3242	67.0785	14.379	30.4051	34.5912	30.2122	17.8643	0	5.64472	5.98624	5.38865	7.49215	7.09695	23.4735
PCHAS_0808720	46.8268	47.8348	45.1064	60.357	40.7851	64.81	64.7383	110.107	59.8161	97.291	39.1891	78.4121	20.0332	0	19.118	17.1894	18.2507	17.1507	21.598	42.1078
PCHAS_0808800	220.9	255.928	261.888	217.68	271.694	154.257	141.995	96.7542	138.398	111.862	61.3715	93.4689	115.259	61.364	141	151.246	148.188	194.796	229.862	222.021
PCHAS_0808900	12.6617	15.2513	12.9577	17.5803	16.848	11.4521	14.215	17.4731	5.9111	18.1356	5.93918	10.7858	3.80576	17.3808	3.90822	5.56941	3.73093	5.83574	8.18951	12.9896
PCHAS_0809000	125.409	140.206	146.314	140.326	144.701	67.3245	103.448	90.7187	45.2005	78.9671	51.1557	73.5689	72.8367	76.801	67.6095	93.8487	82.5945	118.899	118.875	135.925
PCHAS_0809100	108.284	99.6007	119.906	103.49	116.739	66.3097	77.5604	49.9994	65.9036	39.5472	33.1677	32.0727	41.6801	81.217	67.3423	88.9682	76.9996	92.2746	120.225	123.696
PCHAS_0809200	132.774	145.277	141.868	144.635	131.646	136.758	167.249	194.14	124.196	179.245	146.825	177.997	59.3134	90.1938	87.1894	91.9245	70.2693	84.6554	108.255	131.949
PCHAS_0809300	35.5303	41.8306	43.621	45.8421	46.1212	19.6233	34.8264	33.912	13.3905	32.1965	18.7795	21.1014	7.03069	6.00871	8.86665	12.392	9.67363	17.5153	28.6658	40.8943
PCHAS_0809400	110.335	134.881	135.884	128.161	145.264	106.248	142.664	158.193	107.667	162.907	198.277	201.622	69.7661	125.875	85.2911	77.7882	63.69	96.8765	112.794	122.383
PCHAS_0809500	69.163	83.0387	79.7964	79.518	74.0345	87.31	94.363	126.192	87.1392	100.939	99.5583	137.319	26.8729	27.2729	50.0185	29.7233	27.4422	33.7147	46.7435	67.3777
PCHAS_0809600	53.0414	70.9508	60.6049	64.0841	59.5249	70.3167	71.2116	86.075	60.0641	76.2815	49.7187	80.6295	7.65366	20.7136	20.9593	11.461	7.50318	15.4901	28.1815	48.5318
PCHAS_0809700	25.032	28.2914	25.4184	24.2433	24.2091	27.7837	35.8864	47.109	34.077	39.685	102.386	51.1673	19.5402	35.9204	31.8032	18.8712	25.5413	27.4103	20.0984	26.9087
PCHAS_0809800	3.20875	8.83607	8.45363	7.00256	9.08257	3.71537	5.92805	7.50293	3.8691	4.59928	8.76736	10.5683	1.47906	0	2.43021	2.8994	1.15998	2.05264	6.62012	4.59365
PCHAS_0809900	2.48121	4.5364	1.62752	1.65108	1.44659	8.8308	14.2752	21.949	10.1526	26.7608	56.6443	38.9541	5.16353	9.86427	14.0015	5.29259	3.57318	3.21164	1.10386	1.9391
PCHAS_0810000	57.5111	84.8088	71.1623	79.518	83.9925	52.0391	60.8999	67.0698	50.1915	51.7817	30.4825	46.7688	17.018	24.383	18.1615	20.714	20.936	28.7778	51.1252	69.9542
PCHAS_0810100	75.6906	74.6252	78.5927	70.4631	82.1055	44.1117	49.0537	31.0027	40.1153	31.2541	35.3236	21.932	88.8808	50.819	81.4179	88.4457	92.0421	98.4993	94.1036	87.155
PCHAS_0810200	75.9107	78.617	83.6607	77.687	79.3586	68.6976	70.8197	70.4359	73.2744	67.7951	64.1979	62.8592	68.6186	56.5195	66.0407	69.0436	59.7951	91.4338	79.8926	77.7303
PCHAS_0810300	47.4959	48.4662	51.2662	42.8531	48.7239	28.113	27.1519	19.5627	20.5147	17.0587	31.1634	18.5887	47.9359	52.5295	53.1526	65.176	65.7331	63.9894	49.783	51.6052
PCHAS_0810400	14.5815	17.0991	18.7113	14.2113	18.3057	7.33865	8.2653	5.72401	3.05692	2.71304	6.9493	4.25052	8.24883	20.0919	11.4358	19.3144	17.2515	22.0778	20.3538	18.7874
PCHAS_0810500	32.0096	39.8831	31.3877	24.0251	26.6358	14.7215	17.9423	21.4999	15.5831	19.1474	72.759	33.0833	108.964	88.6704	67.9714	69.0653	81.4344	80.3345	33.8986	27.752
PCHAS_0810600	1.48844	2.16247	0.352925	0.259863	0.450514	0.172345	0.353552	0.59101	0.215371	0.590807	1.40392	1.35757	1.23497	0	3.04372	3.76585	3.87419	3.67262	0.566931	0.255703
PCHAS_0810700	1.91774	1.31114	0.454716	0.502219	0.96742	0.666159	0.455524	0	0.554978	0	2.06725	0.437281	2.22762	0	1.08933	2.59929	4.15966	4.41642	0.730446	0.49418
PCHAS_0810800	489.049	423.45	495.796	457.228	453.258	336.402	300.792	255.381	302.558	233.517	163.192	198.267	206.127	260.332	335.547	425.272	405.646	424.555	457.359	475.398
PCHAS_0810900	101.86	108.056	103.166	109.013	98.2653	86.447	97.2504	111.434	62.0089	114.644	73.3022	93.1943	58.1836	68.7124	67.1133	86.2791	74.6701	88.2046	97.3301	103.13
PCHAS_0811000	318.118	242.931	40.3872	33.7679	73.5239	19.9391	57.2056	45.782	47.6673	36.1574	249.185	150.802	360.299	2696.65	579.241	1023.81	1604.49	919.584	206.038	62.5961
PCHAS_0811100	5.0697	12.1682	3.83642	6.21455	3.42807	8.80521	17.1024	31.0945	9.83287	25.8497	85.7893	47.9611	8.32319	4.35979	13.9698	5.55561	4.56233	6.65377	3.08137	3.61345
PCHAS_0811200	77.1211	98.508	96.0025	89.2087	82.7981	46.9713	75.7801	65.9131	34.5281	60.4339	66.6839	47.5506	91.7633	64.2994	60.4653	59.9987	63.6859	75.6895	64.2156	75.0369
PCHAS_0811300	482.714	524.315	530.745	549.829	505.869	567.041	511.345	483.501	624.113	505.277	282.204	456.249	280.356	419.583	366.183	455.875	374.903	411.108	517.478	498.227
PCHAS_0811400	29.2397	35.2915	36.1984	32.1017	34.7537	20.9388	24.0415	22.2377	15.8169	20.4892	10.5923	16.4628	12.3167	18.1819	15.2547	22.3763	16.9776	26.6387	31.0338	32.0515
PCHAS_0811500	0.121945	0.390807	0.216858	0	0.138411	0	0.217243	0	0.132337	0.0907566	0.061618	0	0	0	0.103902	0.330565	0	0.225667	0.174178	0.157119
PCHAS_0811600	132.128	136.386	132.459	139.721	131.762	114.923	128.408	141.813	100.814	124.963	93.2467	108.416	76.0356	88.7954	72.5564	79.6167	67.9035	85.8274	86.2922	117.941
PCHAS_0811700	19.8947	27.0972	25.7826	25.1058	23.5596	11.4891	20.2463	24.6464	7.39459	26.8367	60.1401	34.7882	54.5339	28.144	31.0205	24.5045	27.7524	33.2882	21.8095	23.8068
PCHAS_0811800	22.2999	26.7886	28.5576	25.8938	31.201	12.4232	14.2417	13.6994	8.52333	11.2731	15.7327	3.35788	33.1644	0	18.1639	19.0094	17.3399	27.8576	23.8386	24.9372
PCHAS_0811900	47.166	51.537	65.68	52.7213	74.8159	16.6152	22.9749	17.0211	13.0099	14.7802	9.54532	14.0819	14.1665	17.1305	22.8021	40.704	29.3519	43.5486	65.2067	62.7989
PCHAS_0812000	87.4491	101.982	103.945	105.759	98.1084	73.3052	75.7308	60.4036	61.9494	59.6597	67.2018	54.0043	48.3712	61.364	65.7139	58.0291	47.4201	65.9309	73.2957	89.5907
PCHAS_0812100	1.05615	0.676946	0.187818	0.553168	0.319669	0	0.188151	0	0.22923	0	1.70773	0.722465	1.84021	4.2688	2.15972	3.86503	4.81074	3.38775	1.05597	0.272157
PCHAS_0812200	24.2914	31.3185	28.4263	21.2048	22.2896	20.6101	29.8446	46.5634	23.9374	33.8716	124.295	39.1543	181.739	56.4266	113.478	60.172	89.0263	72.338	34.8956	26.4415
PCHAS_0812300	57.8314	56.851	28.8317	61.7176	24.9576	143.601	132.405	200.825	144.625	210.476	170.714	232.481	28.0131	99.0831	66.2693	32.0181	31.1784	18.1461	14.4833	29.1445
PCHAS_0812400	16.5274	22.6648	6.66426	15.0983	5.38051	45.3944	53.0663	86.075	54.6416	76.9489	116.334	104.512	11.9589	54.3731	30.784	15.6286	18.1327	9.95792	5.48991	8.66639
PCHAS_0812500	0.778571	0.998062	0.314671	0.370713	0.267788	0.491726	1.00874	1.26468	0.460865	1.89637	87.6225	9.68339	23.4315	20.0255	35.4604	5.1804	8.98108	6.54908	1.01096	1.27673
PCHAS_0812600	11.257	14.0508	6.32167	13.5762	7.39722	21.095	37.9973	59.2832	32.1481	48.5038	121.546	83.0835	13.2726	11.9735	22.2117	10.0379	6.74676	8.7713	2.96187	6.48862
PCHAS_0812700	1.0223	0.705654	0.716704	0.823754	0.847941	0.819489	1.19079	0.725972	0.725388	0.936417	0.476826	0.605173	0.0978698	0.794613	0.234511	0.186525	0.255855	0.485086	0.280805	0.658586
PCHAS_0812800	10.1388	12.5952	15.5673	11.9072	14.5134	4.72006	6.14486	5.29162	4.08353	4.74527	3.11611	5.18378	3.12206	8.44943	3.82953	7.08354	4.59102	8.38192	12.0183	11.3799
PCHAS_0812900	57.2748	47.5948	8.70103	11.3059	19.165	0.499882	13.3311	13.7137	3.12339	8.1397	76.4963	38.3916	112.474	407.154	87.3014	174.764	223.803	196.003	43.9869	10.7541
PCHAS_0813000	106.048	124.907	97.3837	133.123	101.507	183.138	200.765	278.561	189.842	286.696	348.993	361.682	50.0106	73.2704	104.259	42.1791	37.8457	42.6792	47.9015	81.1647
PCHAS_0813100	47.1547	54.5107	52.2815	55.6794	50.2361	36.7599	49.9677	63.3738	29.3215	63.4861	35.6267	60.9484	12.8102	23.4015	19.8422	25.5477	16.1165	26.667	35.7437	38.8739
PCHAS_0813200	202.664	230.831	269.569	261.67	305.281	130.413	180.731	109.351	111.883	95.649	47.0991	81.3123	54.4879	133.193	78.6177	133.356	94.9628	137.066	187.602	242.014
PCHAS_0813300	486.684	511.609	543.626	533.778	519.586	409.125	441.585	468.475	409.159	478.704	504.284	462.81	496.486	359.541	507.521	527.716	432.458	526.772	528.506	535.814
PCHAS_0813400	4.28478	6.02087	2.7475	4.36971	2.49403	10.7336	14.239	27.8267	12.4296	28.8229	45.5915	38.7516	5.53774	9.99142	12.3566	3.90892	4.82566	3.91381	2.11849	2.97268
PCHAS_0813500	22.9	26.3831	26.4189	23.1532	23.5794	12.8383	16.0086	10.5315	9.75185	8.19798	8.05593	10.4102	13.709	0	21.4877	19.6446	21.2202	25.5699	25.0492	26.3307
PCHAS_0813600	19.1774	16.3892	3.90772	3.31325	7.15487	0.693915	5.21954	3.17279	2.60146	1.78408	24.6294	9.11003	34.8065	96.8905	26.5525	42.5994	70.1942	64.7348	10.2719	3.26021
PCHAS_0813700	139.567	132.483	139.231	144.951	146.203	129.834	130.746	133.812	135.945	145.724	145.585	136.92	43.3822	66.0419	89.5645	93.1994	91.7037	89.5362	119.998	130.35
PCHAS_0813800	326.568	300.14	305.552	289.011	300.813	318.12	295.45	324.221	289.552	301.675	293.795	314.483	237.971	285.872	302.979	329.904	350.731	361.669	317.7	296.64
PCHAS_0813900	0.117691	0.678914	0.313939	0.385261	0.267165	0.102205	0.209664	0.420579	0.25544	0.262772	1.30831	1.00634	0.732364	2.37845	0.501388	0.877343	1.14874	1.16157	0.252153	0.454913
PCHAS_0814000	34.9015	17.8963	18.6198	26.506	26.9376	16.973	16.1658	24.1132	21.2104	28.0532	25.3951	35.8118	8.68735	0	8.3265	7.56881	11.3554	5.167	11.9642	24.283
PCHAS_0814100	31.6844	33.2832	40.4982	31.5479	33.7151	18.1524	21.755	18.478	17.6698	19.6508	14.2311	21.0719	36.4208	8.89333	35.2454	47.8655	37.9418	44.5186	46.0416	33.0274
PCHAS_0814200	167.481	230.119	221.254	233.803	238.577	154.896	218.075	237.947	134.294	212.34	142.621	197.911	46.5839	84.9061	62.8078	67.0393	46.6	91.178	141.022	165.348
PCHAS_0814300	251.649	235.679	248.537	214.59	189.475	221.787	192.661	174.408	190.489	171.5	205.973	128.04	413.101	285.805	321.8	280.759	301.789	299.173	237.645	276.002
PCHAS_0814400	23.0377	22.6013	29.8903	23.3937	29.0538	11.0239	14.3784	7.46731	9.18399	8.63112	5.70161	4.55619	3.9009	15.8359	6.40949	12.7449	8.66819	14.8876	26.6377	25.1394
PCHAS_0814500	427.689	636.369	672.039	621.041	768.367	362.622	460.842	465.16	322.877	412.026	258.807	359.062	274.783	209.303	235.853	295.425	217.495	355.151	506.323	544.38
PCHAS_0814600	55.7904	61.1477	66.6094	53.9291	63.761	26.825	32.9427	22.4027	29.8733	17.6721	23.6779	19.046	50.7353	55.2063	52.9965	75.3329	82.3836	81.5322	70.5329	64.9786
PCHAS_0814700	126.633	162.775	165.981	140.512	175.977	101.28	136.463	108.509	119.076	93.4751	72.53	83.7916	41.2254	55.7854	52.9192	73.8926	47.1507	83.0096	139.968	145.82
PCHAS_0814800	43.1785	51.6016	53.8737	48.3309	47.0064	49.8346	56.8229	51.7659	47.1604	49.5506	39.2721	42.8756	15.2547	33.7783	31.8055	36.2469	30.3627	35.5705	36.6061	47.1983
PCHAS_0814900	26.6518	26.2811	26.9988	24.0876	22.6827	19.8247	20.5318	21.3191	16.1151	16.7426	12.3191	18.0039	14.2057	11.1978	15.3908	21.7793	19.8305	18.7987	19.8648	22.4883
PCHAS_0815000	48.5438	54.6066	51.484	55.0116	53.3284	43.8492	53.312	65.2566	37.0245	61.6649	46.004	59.3453	22.3222	51.2187	25.2487	29.9912	23.7862	32.47	43.5791	40.4413
PCHAS_0815100	5.28074	11.2824	14.8689	8.06704	3.32989	21.4007	18.8151	22.0164	19.1025	24.891	297.963	72.2465	124.871	284.587	211.472	33.4015	94.4966	32.5746	2.51422	11.3399
PCHAS_0815200	9.05481	14.4003	13.6205	12.6587	15.7639	6.74	8.73257	10.0562	4.43298	9.42444	6.19219	10.0129	5.08385	13.7587	3.82854	4.52156	6.42369	7.72733	7.29321	11.1403
PCHAS_0815300	9.21625	13.3967	11.0483	9.91281	11.1456	3.71593	8.35589	6.56742	3.39341	6.49168	7.1517	6.19186	7.37365	0	9.39512	12.8262	12.5833	15.431	12.2236	8.58788
PCHAS_0815400	17.5981	20.8005	4.03125	4.13993	6.31959	1.24332	3.29449	3.90833	1.03581	3.7294	71.6805	16.1188	47.2189	137.436	48.7952	56.7605	82.1002	59.319	13.2923	4.84228
PCHAS_0815500	113.725	124.522	120.245	114.491	110.52	95.4648	95.9156	82.8891	90.9226	75.5372	122.601	86.5453	165.156	170.455	169.363	170.909	159.622	168.747	134.528	122.077
PCHAS_0815600	20.7542	31.6948	32.0134	25.1669	34.8228	4.38827	12.8602	7.20171	3.13361	5.37257	12.6755	6.48125	44.9212	25.5303	25.5256	29.8422	26.1292	44.3072	31.5772	24.8803
PCHAS_0815700	217.894	116.773	18.5752	30.853	49.9962	17.7198	53.6607	42.5357	47.9778	38.6884	408.734	122.133	262.414	1678.92	484.317	697.666	1035.34	577.794	141.907	43.1913
PCHAS_0815800	1.24699	2.29124	0.591349	0.598698	0.629054	0.216581	0.592399	0.742706	0.541303	0.928065	2.5624	1.84819	1.9658	8.40027	3.11664	3.94371	7.30289	4.0512	1.18741	1.12467
PCHAS_0815900	130.301	169.302	180.866	145.912	179.794	73.7302	130.244	131.335	90.8574	90.3935	126.914	94.7797	129.146	119.153	106.501	98.2934	93.9962	127.294	149.901	169.404
PCHAS_0816000	50.854	70.5703	63.2167	48.8098	72.8514	26.5832	33.8634	35.1406	27.8617	24.9868	29.3136	25.7525	36.561	74.8341	36.1782	60.0601	65.8613	67.4598	63.645	55.1851
PCHAS_0816100	14.3062	24.702	13.759	24.4671	16.1275	26.3688	35.8889	60.5149	41.8235	55.6268	90.8771	69.902	12.3544	23.6015	23.384	8.70595	11.3991	14.0478	6.67235	8.6521
PCHAS_0816200	33.2473	44.0357	41.0163	34.3775	37.2261	26.209	39.1221	54.072	33.2847	52.9578	122.123	68.8166	61.0747	74.3806	63.3463	48.3887	55.084	52.6721	39.778	36.1982
PCHAS_0816300	94.7767	128.794	108.888	129.071	107.11	134.364	171.031	205.051	145.133	188.264	207.129	219.545	35.0113	81.217	62.7767	36.3136	28.33	32.6404	58.0396	81.1218
PCHAS_0816400	310.475	291.933	294.624	282.786	270.258	438.381	377.302	401.485	505.81	492.08	483.684	466.046	371.286	291.479	429.469	321.012	316.134	307.178	284.075	264.566
PCHAS_0816500	37.7073	48.0831	49.4095	49.8936	44.9012	39.2947	48.4366	76.5949	38.7668	67.352	82.4304	88.921	42.4828	16.0429	38.2156	32.5477	35.5134	42.1127	35.4332	43.7252
PCHAS_0816600	22.8625	25.4153	29.4604	24.557	27.9769	12.0986	14.9552	9.04245	11.2424	7.44417	9.8375	6.41453	9.33634	14.4386	15.6752	17.7936	21.2112	21.8154	28.4458	23.5886
PCHAS_0816700	328.501	349.515	378.024	342.712	399.684	166.404	224.155	164.715	128.58	179.127	128.566	119.508	335.744	178.411	284.647	350.529	296.754	404.645	413.726	366.261
PCHAS_0816800	11.294	14.5966	14.8164	13.455	13.3094	4.98434	11.0496	6.50615	4.21944	7.02755	6.17457	3.48292	10.8301	7.48341	8.04544	9.28506	10.2406	15.4183	10.8426	12.2854
PCHAS_0816900	41.702	53.7925	63.4993	51.1918	61.9273	19.4654	41.3246	42.8449	17.5366	23.6653	55.8402	42.7898	96.0157	31.6038	42.6382	44.1581	44.944	63.6672	40.9505	48.0217
PCHAS_0817000	348.474	347.263	301.086	350.961	286.541	443.437	453.139	540.843	489.274	518.698	426.066	542.652	92.5953	359.831	211.849	190.047	188.274	153.766	218.895	305.607
PCHAS_0817100	47.3571	47.852	19.0725	18.9676	25.7165	12.5796	25.3098	19.91	15.1155	19.4885	57.4302	33.3477	44.3772	247.708	68.3581	101.567	156.798	127.16	33.0251	22.2532
PCHAS_0817200	215.451	256.851	247.288	265.398	243.811	249.916	380.377	472.742	318.184	398.422	670.005	603.281	271.51	187.61	234.657	159.379	182.482	214.743	174.586	219.784
PCHAS_0817300	8.36193	13.3321	5.85516	6.98006	7.23691	9.62166	13.1277	17.369	14.0655	18.9033	88.7299	28.4214	22.3748	50.6966	35.8908	22.1007	21.9349	21.4061	9.2563	9.29245
PCHAS_0817400	77.8835	78.7284	91.2162	79.518	98.3953	67.9331	80.6817	66.2091	88.6162	59.7517	93.9643	79.7977	71.7369	55.4703	81.2691	81.8457	66.9776	96.509	95.5616	85.7602
PCHAS_0817500	37.0783	43.189	45.0159	37.8582	46.5932	18.6998	23.4908	17.7246	15.8851	18.3668	18.3381	16.5505	20.9275	31.7821	25.047	31.9733	36.0138	37.0876	45.3573	42.3178
PCHAS_0817600	1.91774	1.91208	1.51572	1.39505	1.12866	2.96071	1.13881	1.01529	1.84993	0.634341	60.0795	6.55922	11.6685	8.61249	17.0662	4.62095	4.85294	4.99477	2.43482	1.37272
PCHAS_0817700	25.2012	29.4114	33.0658	24.4771	33.6917	13.2637	19.993	15.8997	8.50369	12.3556	14.7976	10.5615	28.0997	16.1043	21.8968	25.3818	24.8465	33.2211	30.1624	26.9943
PCHAS_0817800	40.4173	51.8115	44.3291	53.7284	46.8839	44.8982	58.1139	66.4742	40.5218	61.3821	26.3317	51.9272	8.68148	16.5849	11.1877	7.78615	8.67767	10.1245	15.5312	30.928
PCHAS_0817900	14.8386	27.476	40.3149	24.1073	41.5859	4.29537	17.1337	7.52855	4.17489	2.0451	16.9397	10.3384	34.883	11.1066	11.7066	15.2703	10.7285	24.0698	21.587	27.6159
PCHAS_0818000	13.4758	23.7809	20.074	17.6452	15.6265	9.11889	11.224	14.8015	6.83726	14.8485	40.1479	11.9717	67.9566	42.4419	26.2444	31.5485	26.1927	37.3528	13.2486	18.0392
PCHAS_0818100	674.211	732.414	768.088	715.662	695.851	662.986	730.813	806.07	796.223	675.184	640.017	813.879	746.545	751.396	696.95	750.876	629.042	788.969	631.967	761.692
PCHAS_0818200	64.029	69.669	74.9314	59.9266	50.4478	105.475	127.786	185.305	129.897	175.874	387.797	275.44	267.268	160.08	207.348	129.729	131.007	122.969	62.8554	73.9927
PCHAS_0818300	5.1493	8.98583	3.04253	5.6115	2.26243	11.8284	21.6019	38.5838	11.7531	41.8837	70.3691	60.4491	7.6903	14.7703	16.9269	6.66411	5.51246	4.95924	1.51843	3.08186
PCHAS_0818400	28.4123	38.6464	39.6304	37.345	35.6952	23.7319	31.8765	34.6197	18.8296	24.0511	17.8635	28.9308	6.20835	26.2988	9.05507	9.99488	7.40939	12.3085	20.2911	25.7091
PCHAS_0818500	2.98971	4.07209	1.32917	4.40407	2.12088	2.92085	3.32883	3.78392	3.65005	3.33761	3.2102	3.19552	2.79064	7.55249	2.54736	2.7859	7.2954	1.84422	1.06758	2.6483
PCHAS_0818600	0.17967	0.690966	0	0	0.271908	0.93617	0.960238	1.71218	1.16989	1.33718	39.0381	4.30166	7.1555	7.26201	10.7161	2.92228	2.92284	2.43827	0	0.231494
PCHAS_0818700	0.49306	1.10611	0.621082	0.48421	0.528546	0.356817	0.512387	0.685219	0.0891795	0.672753	0.747421	0.421601	0.204547	0	0.140036	0.222763	0.267366	0.354838	0.234751	0.529399
PCHAS_0818800	18.3092	25.4461	12.089	21.2444	8.43604	47.6999	62.813	106.35	42.2964	110.226	136.575	127.725	16.0184	51.2893	30.8915	15.6022	10.3215	9.95226	4.40176	9.69305
PCHAS_0818900	84.8783	87.6303	89.5996	91.1573	82.0834	61.0717	67.2664	72.9018	54.6351	68.7319	103.902	53.0034	174.852	57.2307	104.693	88.8146	91.8816	108.694	78.3137	89.9008
PCHAS_0819000	26.6919	34.2167	34.087	37.0615	28.4661	24.2686	32.5518	26.6739	23.3287	19.7319	23.1727	21.4448	32.5506	21.7218	23.5058	23.552	20.9824	21.8797	25.0754	27.6974
PCHAS_0819100	25.3607	27.414	30.3508	26.9248	25.5176	21.6664	24.4214	36.2514	17.852	30.1992	18.4253	28.1321	6.14194	5.54077	10.2786	13.0062	7.58222	14.5446	18.4054	20.3119
PCHAS_0819200	1138.19	1073.64	946.282	1250.33	767.307	1666.25	1684.36	1892.92	1563.9	2015.55	994.558	1701.17	268.935	632.463	543.939	468.995	354.56	371.85	551.042	852.536
PCHAS_0819300	151.668	115.79	19.6355	27.9116	44.5599	44.2143	66.9338	82.3868	84.8759	94.0458	422.162	185.679	223.686	1059.92	313.334	438.367	601.733	439.312	96.8164	30.8238
PCHAS_0819400	4551.38	3647.4	3493.9	5164.93	2972.72	6269.75	5018.71	4177.73	6136.56	4121.1	1227.02	2436.74	333.769	1268.46	766.078	578.937	462.797	423.885	1218.44	3103.55
PCHAS_0819500	811.764	770.112	712.905	942.892	614.541	1061.76	951.77	806.495	1126.62	790.085	277.531	561.339	87.5388	271.866	186.341	141.96	126.304	122.577	292.063	572.477
PCHAS_0819600	445.663	455.514	455.903	459.996	472.321	333.782	347.499	320.263	249.016	268.034	192.077	212.967	316.67	186.422	304.237	331.587	291.374	364.887	405.704	448.919
PCHAS_0819700	2.58743	3.56075	2.53748	4.2848	2.76406	3.37045	3.72824	5.80167	3.22085	3.39825	2.42256	3.38373	1.70481	4.61383	2.33428	2.83652	4.45678	2.95743	1.57611	2.45129
PCHAS_0819750	207.662	196.635	163.762	235.426	147.396	362.287	321.487	333.668	307.294	277.303	165.073	222.837	31.377	117.99	67.3831	39.3869	44.0354	35.0325	71.452	133.524
PCHAS_0819800	4.04215	8.75953	3.50856	4.03261	2.69452	4.5132	14.4021	27.3996	6.47548	20.4854	51.9372	43.7801	4.31201	19.4498	10.8243	3.91335	4.38379	3.4433	2.47437	3.10004
PCHAS_0819900	1.35203	0.72216	0.300543	0.147529	0.085255	0.195687	0.200718	1.2079	1.2227	1.34165	75.035	5.39503	23.2769	31.8774	30.3356	3.81775	10.6307	4.17003	0.643714	1.01617
PCHAS_0820000	44.4049	55.1673	61.407	51.5671	57.6997	23.5931	31.3172	31.4106	22.7937	20.3895	36.9152	19.9119	67.9083	32.2968	54.2721	51.5216	63.1377	68.0208	62.2836	54.4186
PCHAS_0820100	58.2994	68.7465	69.7815	58.5578	67.3498	23.6913	34.3979	21.2196	21.0892	17.337	75.5342	26.8424	164.803	73.0074	92.9786	90.4996	93.827	108.041	69.3035	68.1334
PCHAS_0820200	1564.67	1513.98	1479.09	1556.83	1520.03	1588.82	1584.45	1475.94	1375.12	1508.69	1193.31	1366.38	1331.11	1328.03	1490.9	1457.64	1321.16	1343.55	1528.32	1577.75
PCHAS_0820300	306.952	313.516	281.17	360.539	270.33	420.176	435.106	523.132	442.47	495.81	263.379	425.039	77.0215	167.204	151.987	116.85	85.6017	116.976	159.536	241.345
PCHAS_0820400	21.5488	16.0092	1.95959	2.5651	5.18818	0.850606	6.10732	3.20861	3.72037	4.73837	88.8402	11.7255	49.3708	168.256	56.7507	62.065	92.4182	66.7647	13.9904	2.20853
PCHAS_0820500	1.46687	1.50432	0.260858	2.68901	0.88797	3.05725	2.09057	5.94093	5.094	3.49347	4.74369	5.01712	0	11.8578	1.4998	1.19291	1.90902	1.44776	0	2.26797
PCHAS_0820600	100.023	116.773	101.325	140.482	88.8414	131.327	153.795	175.317	105.187	161.29	73.4052	133.585	24.6005	33.69	30.2343	16.1394	18.9835	15.8657	25.5119	67.659
PCHAS_0820700	0.248887	0.159526	0.331952	0.651787	0.282494	0	0.665083	0.592947	0	0.370465	0.503045	0.425633	0	0	0.212062	0.337339	0	0.153528	0	0.320677
PCHAS_0820800	1.52114	2.84996	4.88995	3.21749	5.22388	1.21937	1.66762	0.836296	0.761892	0.174169	0.709497	0.400209	1.16501	4.7294	0	1.26876	0.380701	1.29922	1.00278	2.11066
PCHAS_0820900	15.4945	27.2311	38.8871	23.5609	40.4684	3.47243	13.8016	7.14465	4.88175	4.83587	6.06139	8.54768	17.4176	10.1011	9.79502	14.5653	13.8227	33.9151	24.2731	26.0817
PCHAS_0821000	39.2115	51.2933	48.8993	45.4504	48.9382	35.2298	45.5813	60.3687	24.7557	50.5653	64.0507	58.2006	29.0043	29.9033	33.9352	32.8407	30.0889	39.02	39.1873	46.4704
PCHAS_0821100	1.94457	3.06544	0.327116	0.688169	0.397684	2.3733	3.41741	5.4779	2.7947	10.1306	49.7399	19.4137	7.3912	21.2424	16.5238	5.94803	7.26725	5.73825	1.20108	1.18502
PCHAS_0821200	0	0	0.199991	0.147255	0	0	0.200346	0.401887	0	0	0.113651	0	0	0	0	0	0	0.138743	0.160631	0.144898
PCHAS_0821300	68.1344	74.0513	77.2648	73.3763	67.6211	53.5951	59.3708	48.2264	67.511	40.4199	34.9269	39.6842	41.1696	59.8673	55.95	78.9648	84.3346	87.1038	78.278	82.38
PCHAS_0821400	39.0029	43.8829	44.4247	46.6809	44.2451	27.9923	43.7571	51.9893	19.1694	49.227	31.0767	44.32	9.46755	18.2398	16.1492	16.1651	15.1019	18.5315	29.0977	31.2316
PCHAS_0821500	88.3324	62.8619	19.6355	19.9858	33.9114	12.9729	26.0343	19.3421	21.1455	21.2691	79.0938	34.433	95.3843	630.047	155.506	312.517	431.092	274.044	61.2286	25.1054
PCHAS_0821600	7.81572	9.26899	7.76703	9.90554	6.45168	7.76727	7.3713	11.2019	3.62856	9.95386	4.85735	7.29053	1.35243	1.6893	2.35035	1.75611	1.6318	1.39221	1.91032	4.52346
PCHAS_0821700	52.9428	32.3372	6.36894	8.56347	15.3175	6.49078	14.4249	13.355	10.139	6.95335	40.5996	25.5641	61.2391	289.512	78.5436	127.898	214.809	117.953	27.1342	8.02514
PCHAS_0821800	7.45135	10.1661	9.41763	10.7325	9.58517	9.33654	13.5589	15.5964	8.66393	16.9537	12.6938	16.7478	2.51712	6.4537	4.17211	2.88557	1.73167	3.48014	4.10516	6.85759
PCHAS_0821900	13.3187	22.2425	11.5166	21.7594	9.98564	30.1357	38.747	58.9488	28.377	47.6521	88.9085	63.9425	13.9907	24.6938	18.74	11.4274	13.9144	7.68812	2.61792	8.34405
PCHAS_0822000	244.827	251.629	293.691	267.669	316.511	91.9793	140.558	74.4756	83.0282	74.5569	78.889	63.7846	205.613	154.618	205.14	251.307	231.033	280.956	321.35	293.881
PCHAS_0822100	73.1247	75.4411	80.2727	77.2226	82.2406	62.6327	69.1504	58.0208	52.4511	50.5085	34.2921	38.5439	43.0104	80.9751	46.0888	54.8173	61.9232	59.0103	64.7424	78.4064
PCHAS_0822200	270.686	270.097	310.815	287.04	315.783	189.083	208.458	146.444	225.037	124.567	49.3966	108.92	50.6939	134.701	119.893	192.226	171.079	191.872	332.682	288.171
PCHAS_0822300	98.3345	117.913	110.706	141.07	128.436	87.8224	107.734	135.902	79.4153	100.227	51.8705	83.4311	20.8714	10.2701	19.9179	17.5642	9.09382	24.1379	35.5672	85.775
PCHAS_0822400	8.6755	10.6441	11.4054	8.36045	11.2227	4.1275	6.42694	6.10504	3.48006	5.36991	10.5035	4.11304	19.2424	12.7299	11.3684	11.4482	12.2034	14.4121	10.3467	9.8867
PCHAS_0822500	44.8591	40.6864	46.9979	46.3037	49.2618	31.6859	32.0554	28.2809	27.392	19.3435	17.3002	20.5144	30.7918	10.1011	23.6358	26.082	21.9538	36.3816	41.407	45.5625
PCHAS_0822600	71.4307	68.2772	82.7668	79.8439	82.6767	67.0026	85.1306	100.801	57.8007	78.9091	74.1992	91.0854	18.5852	40.2387	31.8094	25.6378	30.7712	34.3902	61.8559	65.418
PCHAS_0822700	17.351	18.8344	21.2755	20.704	27.4232	16.04	17.948	20.3351	11.8444	15.4127	19.373	17.7079	5.57271	11.3113	11.2071	11.3794	7.2842	12.4294	17.1882	19.4711
PCHAS_0822800	19.1268	18.4509	17.1779	16.2765	17.5889	11.6303	13.9176	14.4863	8.01869	16.7841	14.4289	10.3986	15.8057	10.8884	16.1329	20.2908	16.1523	20.6058	14.7316	17.801
PCHAS_0822900	92.4524	100.071	94.2942	99.6942	82.8172	118.463	108.994	131.858	93.6914	115.859	97.7823	120.518	30.4576	50.3734	53.867	46.6837	40.1803	49.6215	61.9806	77.2233
PCHAS_0823000	43.6373	59.6685	62.7277	53.8056	61.7744	21.1582	29.1521	29.8888	26.4404	17.3209	42.9968	26.1191	103.187	22.0469	52.9826	54.956	50.2833	77.1646	52.4598	51.773
PCHAS_0823100	118.746	112.255	127.762	117.857	127.19	94.6451	99.4933	108.832	74.73	106.535	82.194	97.3634	161.282	175.326	145.99	134.49	125.254	139.809	125.851	120.162
PCHAS_0823200	3.49189	9.24454	1.61993	1.49096	2.75715	1.31844	1.35234	1.80849	1.31807	0.790943	5.44672	4.15417	10.7701	36.8184	12.4184	16.8737	18.0295	11.9874	5.09601	2.54297
PCHAS_0823300	190.141	196.492	201.567	205.392	200.632	134.262	158.422	167.845	92.668	172.103	91.5213	128.042	114.085	130.41	131.806	171.75	139.919	180.869	184.655	205.92
PCHAS_0823400	361.96	365.87	369.676	328.135	364.427	166.457	194.629	131.575	143.909	119.104	430.514	142.252	987.228	615.162	612.188	591.494	639.819	654.587	434.564	395.885
PCHAS_0823500	94.3356	85.4069	26.5619	22.6459	33.7579	10.2403	25.2086	19.6651	13.6499	12.8716	76.2675	43.6928	86.5867	595.767	142.671	266.378	351.686	246.344	65.687	29.3736
PCHAS_0823600	33.3386	33.9384	34.584	35.7788	33.7347	25.6592	27.367	18.8441	17.877	17.6117	7.72925	14.3093	3.9051	13.2108	6.34955	10.9866	11.0596	13.3068	23.3424	29.0577
PCHAS_0823700	1737.53	1800.04	2057.86	1987.19	2261.15	957.876	1165.67	680.2	814.55	729.218	303.767	436.338	515.829	694.575	806.301	1332.76	1017.77	1324.51	2036.01	2022.55
PCHAS_0823800	259.167	355.317	381.205	347.406	408.586	231.931	311.844	342.861	217.613	308.613	303.639	342.175	261.865	186.422	221.008	243.955	197.227	325.969	317.944	331.657
PCHAS_0823900	97.7322	90.5588	82.177	85.3137	79.0435	66.4217	85.7925	99.7569	63.4058	83.278	69.4232	81.7512	40.1036	28.6246	71.5052	68.1523	57.6046	80.3822	71.5673	96.4947
PCHAS_0824000	4.31774	5.53498	5.50966	4.03524	5.03793	2.06084	2.90651	2.33607	1.46651	2.42848	1.84864	2.14191	1.55877	1.99828	1.96582	3.01546	1.82303	3.41569	4.14283	4.56518
PCHAS_0824100	0.807024	2.84497	1.97333	0.792538	1.52666	0.350416	0.718849	0.961323	1.75159	0.600621	0.611676	0.690062	0.502192	0	1.71904	2.18766	3.28212	3.48472	1.1527	2.0796
PCHAS_0824200	204.731	214.9	229.894	226.888	221.232	145.265	177.828	158.974	128.65	144.792	104.185	123.133	191.892	73.4898	144.385	148.11	148.484	181.247	198.412	199.127
PCHAS_0824300	3.38829	5.01173	4.63498	3.41279	5.12774	0.452683	1.39296	1.55235	1.69709	2.71569	1.31699	0.891454	2.59502	21.0692	1.33244	2.11959	0	4.18017	3.35049	3.02234
PCHAS_0824400	12.5029	19.6704	21.8012	16.265	22.5462	7.3325	12.5832	10.2513	5.81503	7.85505	7.54837	6.10908	19.8044	6.56299	15.357	20.2476	18.2263	25.9421	20.0616	19.0382
PCHAS_0824500	3.50214	3.53424	2.58393	1.36595	2.42448	1.55301	1.59294	3.28413	2.26417	1.33095	3.53922	3.82286	7.97531	12.0469	5.33305	8.98854	13.0914	10.8475	2.98004	2.11214
PCHAS_0824600	44.834	51.4663	54.5606	51.326	47.917	27.1662	39.033	54.613	16.6305	47.2233	66.4912	50.8984	89.2143	38.3925	61.9408	52.6137	58.7189	66.0153	47.4857	54.2576
PCHAS_0824700	15.5052	23.4651	5.9359	5.35759	6.84398	25.0597	31.0749	42.3264	37.8595	53.5309	236.563	83.9673	41.8102	165.378	105.321	48.4524	58.8548	42.243	8.30494	8.04648
PCHAS_0824800	7.14453	14.9326	12.8434	15.2528	16.2185	10.2508	13.0046	17.2061	8.76468	11.5593	16.01	10.0933	3.47938	6.27764	7.14613	2.52616	3.03198	4.40715	5.98975	7.40427
PCHAS_0824900	0.6698	2.28967	1.38964	0.584691	1.1826	0.775552	0.795491	3.45741	1.93834	2.99096	1.12815	1.52727	3.89014	9.02411	4.18512	2.4209	2.90564	1.92813	3.50789	1.43833
PCHAS_0825000	135.07	150.252	123.533	140.832	136.908	156.62	163.398	202.413	148.152	190.99	110.352	180.3	30.28	70.2418	51.99	37.8185	27.6429	34.7807	79.9833	109.469
PCHAS_0825100	427.225	404.814	399.042	392.024	340.048	476.22	397.046	379.783	489.664	380.557	282.923	318.833	437.608	306.82	388.074	364.637	429.745	364.493	338.288	423.306
PCHAS_0825200	71.2425	81.9732	74.6362	72.7473	62.777	60.1717	67.2457	79.3888	45.7647	69.7835	60.6748	60.5244	63.4957	90.5656	65.5969	82.6222	84.8657	84.5613	52.192	64.7724
PCHAS_0825300	32.6598	42.2684	44.998	46.3172	47.6105	30.9901	39.4083	49.9665	23.7797	48.4584	57.3645	43.8972	50.3866	16.8698	38.4074	37.1954	35.9861	44.026	34.726	40.7359
PCHAS_0825400	11.7427	15.5876	19.3996	14.2841	17.4556	6.39609	6.56053	8.44238	3.61942	5.7918	6.31972	5.94132	18.1599	5.61684	10.0645	13.844	11.9816	18.2589	14.8868	14.7717
PCHAS_0825500	4.91935	12.1775	12.0665	9.77316	18.2269	3.8301	6.04396	9.69916	2.20906	8.83736	14.9143	9.28307	5.91128	6.85631	5.4923	8.50698	4.96719	13.1845	11.3877	8.30535
PCHAS_0825600	58.5239	61.6624	54.7104	53.012	53.687	55.0002	59.9848	57.2987	42.1957	60.4115	68.6632	52.7841	29.1843	64.8068	51.4017	50.1199	49.2329	47.9695	45.231	56.5534
PCHAS_0825700	0.83261	1.66771	0.555245	0.408833	0.551272	0.903814	1.8541	2.10758	1.92007	3.25324	15.1457	4.98358	1.42481	2.10331	5.32064	2.53915	3.55549	2.9532	0.371639	0.938673
PCHAS_0825800	15.5167	17.1555	3.60198	2.69954	4.37903	2.01025	3.73725	3.79147	2.98313	4.46853	20.3963	11.8761	18.4561	90.6389	26.1336	43.5821	67.6657	41.1421	7.49099	4.98644
PCHAS_0825900	41.9852	48.1921	52.5691	49.2254	49.6805	35.1584	41.7865	48.6091	30.4528	41.7691	45.0274	51.6524	39.7228	30.3032	33.7654	37.1632	34.8472	41.3588	33.197	39.8815
PCHAS_0826000	97.3037	56.6173	8.59052	9.93975	22.9762	7.19149	14.7528	14.7967	16.4759	15.408	71.8326	37.7652	84.1686	446.283	109.366	261.898	379.451	211.994	59.1413	10.6698
PCHAS_0826100	13.8019	22.2931	5.89064	5.42168	4.80412	0.958865	0.983517	4.93224	2.3965	3.69792	21.2011	12.2737	26.1094	145.042	39.9834	68.8417	81.7279	35.758	10.2512	6.40187
PCHAS_0826200	0.396918	0.508816	0.352925	0	0.600685	0.68938	0	0.236404	0.430743	0.590807	0.401121	1.35757	1.48196	8.02143	0.676382	0.537979	0	2.20357	0.283466	0.255703
PCHAS_0826300	45.8636	59.9552	58.8332	54.8318	59.8067	43.1346	58.4532	60.0311	41.3127	58.5534	86.6529	62.6226	115.062	65.9434	63.0186	62.1631	77.8539	80.0653	53.08	53.0198
PCHAS_0826400	14.0865	15.115	16.0508	16.8053	16.9756	19.5727	18.0311	24.3618	15.4002	22.0548	22.2498	23.9115	7.01257	4.21746	13.8693	10.0413	8.48728	11.8433	11.1779	11.8309
PCHAS_0826500	75.7852	83.8	66.9391	78.8608	55.9214	86.5158	80.0225	75.9267	56.3721	63.3128	28.023	38.1944	12.8049	50.714	19.0295	16.156	22.0445	16.718	22.2228	56.9055
PCHAS_0826600	131.895	150.832	169.586	150.339	183.451	107.947	125.091	87.0336	87.5283	74.8571	39.3161	73.0226	18.895	76.705	37.9989	42.4415	47.8523	58.5324	128.078	132.039
PCHAS_0826700	338.008	313.809	300.545	297.73	259.685	387.56	356.43	371.792	474.097	309.02	227.883	342.961	133.583	152.221	196.544	190.144	197.584	225.345	236.015	281.44
PCHAS_0826800	416.831	375.69	387.625	447.999	333.976	516.781	484.184	449.862	531.642	497.568	267.405	424.69	68.1569	208.199	167.935	196.223	181.707	175.932	258.479	369.219
PCHAS_0826900	1.80605	2.37309	1.44529	1.59627	1.94743	1.01946	1.28698	0.752977	1.07798	1.14252	1.59703	1.85316	3.70876	7.2998	3.23155	4.52862	5.58229	3.84356	2.38617	1.97794
PCHAS_0827000	4123.3	4389.07	4939.81	3656.41	5296.22	1815.21	2460.28	1764.25	1933.57	1718.69	3373.52	2105.83	13484.3	5062.53	7747.17	9168.1	8494.34	9812.71	8426.22	5723.07
PCHAS_0827100	12.4058	13.1458	15.5232	12.9037	15.1787	5.82111	10.4266	8.2827	6.94865	8.19052	7.02689	5.98831	3.11285	12.1313	4.94417	7.05133	9.11425	6.97375	8.43112	11.4725
PCHAS_0827200	64.0181	83.9825	87.8054	68.5818	97.6267	24.1892	40.2228	30.432	16.2731	36.6598	60.9398	32.1463	210.816	68.2062	90.2367	115.229	99.1046	147.129	109.989	85.3183
PCHAS_0827300	60.7285	115.276	114.226	93.2807	105.16	32.4539	62.4155	72.3396	25.3476	34.7667	105.04	83.8823	98.8353	94.4061	39.8025	50.6528	60.795	77.8031	61.7192	61.6933
PCHAS_0827400	2.21969	4.74243	1.16396	0.819773	0.947473	0	1.11533	1.01696	1.11178	0.931892	4.8315	2.91999	4.25004	9.20172	5.14038	9.48849	14.2586	6.67061	2.43881	1.02665
PCHAS_0827500	104.123	118.152	117.881	110.981	107.102	100.284	133.53	147.1	116.499	148.224	223.499	197.078	104.146	106.3	112.246	90.8983	84.7899	104.861	99.8882	106.278
PCHAS_0827600	0.951587	1.3862	0.653817	0.962824	1.04735	0.600998	0.462337	0.772859	0.375519	0.643829	1.0928	0.295881	1.50729	5.24478	1.32675	2.22778	1.68875	2.18788	1.05028	0.668762
PCHAS_0827700	6.14266	7.0392	1.86198	2.25453	2.67616	2.0206	2.98446	3.60312	2.72705	3.04775	7.52448	5.2524	5.44407	30.0942	10.2297	13.3716	23.3164	15.9029	3.78867	3.05785
PCHAS_0827800	74.0828	99.6541	75.9548	84.207	81.2918	109.362	136.496	181.204	110.271	170.46	181.099	204.391	40.6683	81.4166	56.4472	49.0427	42.7208	49.8863	59.7806	70.6513
PCHAS_0827900	7.15769	10.896	3.33134	7.24888	2.75038	18.6475	28.0927	41.0324	17.3558	47.5274	78.7206	69.045	8.49056	33.9028	25.3475	10.7625	8.00524	6.82986	2.15653	4.75523
PCHAS_0828000	88.0001	87.9403	102.995	107.497	108.712	103.034	102.677	116.547	95.1941	114.666	94.6144	106.739	47.5874	79.5459	68.5119	54.4928	49.396	71.106	77.9058	91.286
PCHAS_0828100	125.35	147.713	137.763	125.903	137.857	135.901	160.893	194.297	195.176	184.843	228.176	218.36	53.2935	157.344	108.13	90.2253	96.2588	105.659	122.882	136.427
PCHAS_0828200	237.221	251.387	232.021	257.605	238.378	276.872	309.91	408.794	298.626	378.052	270.418	341.854	83.4528	217.331	135.287	100.745	67.9194	90.9203	144.568	224.14
PCHAS_0828300	1.56592	3.82657	0.478625	0.704833	0.814628	0	0.523063	0.582914	0.531053	0.655553	3.61009	3.34744	8.16093	23.7347	4.66982	7.49486	8.43831	5.49384	1.88718	1.07185
PCHAS_0828400	28.5034	31.4188	26.7163	24.4854	27.75	21.2842	18.7589	13.8408	18.717	16.079	19.2646	13.3505	6.77847	22.014	22.7392	22.3925	18.6065	20.4942	29.6914	31.2279
PCHAS_0828500	3.76261	5.98095	1.33823	1.87217	2.61935	2.0912	1.87685	2.50992	2.12329	1.9042	6.99651	5.40506	3.18428	27.3743	7.95064	10.9136	12.4867	8.07704	2.68713	2.23003
PCHAS_0828600	11.8233	11.0228	2.86713	4.92589	1.21998	4.66704	3.82962	4.48121	4.66574	7.19948	21.1813	12.8669	10.7016	21.7218	11.9055	29.865	34.9706	23.2058	9.21138	2.76974
PCHAS_0828700	21.4406	30.556	7.02927	7.99885	5.43816	21.6359	45.0245	64.3494	41.856	73.9908	260.133	142.979	52.7718	140.399	89.1984	63.4783	93.9205	71.966	13.858	7.09916
PCHAS_0828800	55.0291	56.938	47.3571	48.6372	55.4701	29.6969	46.916	53.1427	34.978	48.2684	48.263	46.3815	37.1785	135.04	44.8776	71.3893	88.2413	72.0119	47.4406	49.8844
PCHAS_0828900	440.844	422.402	411.781	448.835	388.043	558.628	528.513	578.985	544.803	570.818	448.694	554.659	152.839	327.275	269.831	231.69	193.925	213.942	300.379	380.793
PCHAS_0829000	43.3288	37.6123	30.3357	32.1646	37.0459	27.2576	35.5558	37.5922	19.623	35.8019	43.098	35.0071	42.8852	124.107	45.348	70.519	87.1367	74.9215	37.7662	35.1663
PCHAS_0829100	214.302	194.622	168.742	198.03	149.787	345.837	276.709	316.486	389.085	317.247	195.327	267.625	82.8472	236.015	172.146	148.001	174.786	113.823	122.604	164.014
PCHAS_0829200	6.37384	9.07858	3.14855	2.31831	2.4115	0.307508	1.57707	1.26542	1.92139	1.31769	9.48306	4.84452	9.69539	71.5615	12.9735	21.3576	28.2263	14.4164	4.80487	2.2812
PCHAS_0829300	22.4347	26.6521	25.1931	26.8436	25.3909	18.4749	20.3281	17.7393	14.6919	14.8257	7.7203	11.9069	6.98031	15.6341	8.73373	17.4321	10.3826	15.3899	21.2708	23.1745
PCHAS_0829400	67.5104	67.1792	76.7478	77.9034	71.8444	49.2574	58.2122	54.7137	48.8423	42.6731	16.8227	32.6851	19.1827	24.9194	25.215	31.3366	33.0978	47.9193	51.5159	67.5212
PCHAS_0829500	19.2488	41.7047	36.4001	27.6893	34.6695	16.9514	37.1892	44.5664	30.0097	36.7224	152.333	72.3271	41.8389	65.7471	51.2813	34.1737	31.7545	42.4778	22.8468	25.8488
PCHAS_0829600	36.8052	27.1291	38.8619	32.5301	33.7681	28.7659	27.0467	29.5935	17.9737	20.544	45.0988	20.4562	30.9191	37.1903	58.7991	42.4025	40.4149	44.8394	32.8563	28.4528
PCHAS_0829700	7.9906	25.2667	23.2095	11.1604	24.5886	4.6261	14.2351	20.3059	11.562	11.8939	68.9084	23.6861	64.9722	0	24.51	14.4405	13.8655	28.2599	16.7394	17.159
PCHAS_0829800	9.61535	13.1694	15.3443	11.6626	18.8788	3.86742	5.67981	2.1099	3.0755	2.48582	1.79	2.59636	4.03093	12.2728	4.91561	7.68234	8.56197	11.3631	11.7823	15.7142
PCHAS_0829900	0.198784	0.382236	0.530254	0	0.150417	0.172627	0	0.118395	0.431448	0.443831	1.30578	0.679897	2.47397	4.01728	1.01623	0.673574	0.646756	0.858348	0.28393	0.256121
PCHAS_0830000	55.0164	90.1813	74.5808	58.6543	82.1229	15.6646	34.277	26.8588	21.5329	20.5847	367.014	44.2152	672.736	230.874	283.307	169.511	215.19	269.643	110.787	81.3439
PCHAS_0830100	66.3631	72.4315	73.8987	76.4438	66.3231	64.155	75.0058	79.6108	46.8799	63.3687	60.7388	53.5332	48.3088	31.6309	47.7425	48.5803	46.8498	54.4532	53.2068	66.347
PCHAS_0830200	59.6887	77.3156	72.12	77.6117	76.3251	45.5132	62.2445	67.3848	50.1048	49.8403	32.7875	49.7932	5.69438	16.812	15.9483	23.9603	21.653	34.1252	53.1731	61.6314
PCHAS_0830300	189.126	207.689	220.426	208.735	204.16	161.226	198.987	221.152	133.219	181.756	192.882	162.458	218.642	131.494	162.622	146.396	131.252	161.349	150.247	181.92
PCHAS_0830400	44.6588	51.3802	49.1793	50.1575	48.0733	28.5594	36.6171	29.0471	21.9003	26.7009	15.4845	23.3273	6.74406	7.55249	13.8513	16.9687	14.5908	18.788	32.0273	43.8173
PCHAS_0830500	1310.99	1204.29	873.627	1599.17	654.224	2251.04	2367.25	2884.24	1705.27	3585.57	2366.97	2911.88	308.087	1031.89	820.072	305.993	261.657	191.344	189.455	685.262
PCHAS_0830600	10.0232	12.093	5.50461	4.63211	3.12298	21.5046	12.0791	10.1837	7.67809	20.6238	33.665	6.04977	9.53921	59.5767	17.0803	25.1727	27.8152	11.6383	3.78963	6.07729
PCHAS_0830700	213.996	124.33	20.1749	26.506	51.8438	9.65889	34.4771	29.9428	29.9342	26.4889	166.355	98.1481	255.255	1654.35	330.171	631.652	872.843	586.748	135.989	30.0943
PCHAS_0830750	21.627	31.2726	27.5372	28.998	34.9553	18.3304	29.8978	36.0667	15.7718	25.7531	34.9695	30.1799	3.87589	6.99305	10.3192	11.7252	11.8213	12.3802	17.2987	23.1837
PCHAS_0830800	11.0416	22.0178	24.5443	22.4899	39.4541	17.0465	20.7631	26.3053	7.98832	13.696	40.9144	18.8826	6.10747	0	4.18127	4.15711	11.9748	10.595	21.028	13.436
PCHAS_0830900	21.9406	26.117	21.2507	24.6249	18.9739	50.3559	55.1404	57.405	70.5807	55.9857	106.113	89.7837	14.6284	79.1793	43.3976	21.2415	26.7694	18.3678	13.9904	18.6779
PCHAS_0831000	85.828	51.0098	8.81815	9.13815	20.1968	7.0175	13.0871	10.6468	9.56666	5.6496	66.4446	27.6387	94.4749	623.537	133.114	240.128	356.527	237.151	44.4195	12.3047
PCHAS_0831100	65.1219	68.4385	67.3486	68.1583	74.3992	51.3853	58.948	50.4125	38.5041	56.1235	19.7828	37.281	8.99761	33.7165	19.3326	23.442	16.8272	26.0716	48.1362	56.8209
PCHAS_0831200	0.6663	2.68444	1.10026	0.747818	0.864309	0	0.508716	0.68031	0.826378	0.425048	3.65536	0.651124	2.13235	7.69454	2.75748	2.96732	5.57446	1.99634	0.815742	0.735847
PCHAS_0831300	28.3881	48.1543	13.0181	18.8107	5.7213	106.251	145.657	198.187	179.398	347.915	1665.09	577.752	334.228	707.057	726.807	145.569	176.115	107.188	18.703	30.2441
PCHAS_0831400	69.58	74.2968	76.5137	65.8114	82.528	31.2816	44.1523	35.8489	24.8914	34.3702	24.5797	23.693	47.3213	46.6646	60.7278	82.6237	66.863	88.5954	99.6032	80.0302
PCHAS_0831500	1.49947	4.62528	1.70826	1.34984	1.31191	0.569696	1.08521	2.00943	0.508516	2.92942	64.4969	8.8148	14.1129	47.3487	20.2022	7.74839	8.84249	9.59642	2.14174	1.32823
PCHAS_0831600	38.9735	51.2824	52.3474	49.2768	49.2292	28.2938	43.7156	54.531	23.2733	43.1249	55.9533	50.0758	45.9382	20.8367	38.6537	33.3994	36.2293	47.9548	40.6458	41.0488
PCHAS_0831700	21.2697	23.5051	24.3902	28.6188	24.6412	18.3435	25.8708	31.1025	13.3718	27.2927	15.8617	24.5839	11.3187	5.92889	8.99883	7.75391	8.11335	12.3059	13.8282	19.0888
PCHAS_0831800	4.4957	6.94576	6.84898	6.88376	6.89231	2.11103	4.25234	4.34352	1.08065	4.01071	2.17546	2.6045	1.20286	4.14322	1.19782	1.86574	1.81051	2.60157	3.11655	4.13207
PCHAS_0831900	14.6736	13.5956	3.10034	3.23398	6.59604	0.252333	4.14112	3.80735	1.57664	1.08126	22.1701	11.4289	24.9522	76.338	24.7575	37.0201	63.3403	63.8087	11.8283	2.24627
PCHAS_0832000	27.5176	30.8151	26.7175	25.2635	29.6776	22.5233	23.1024	17.7081	20.5949	18.832	8.31073	9.73634	3.14916	0	14.5528	15.862	18.5235	19.1206	27.1064	30.5645
PCHAS_0832100	13.0894	16.9745	18.8112	15.2459	22.7459	7.00524	9.62565	7.25209	6.27654	7.92926	7.84448	5.46602	14.2068	18.4553	9.85586	8.458	12.1323	18.1201	13.5872	15.0019
PCHAS_0832200	68.2947	74.403	84.8027	74.3037	84.3717	48.4148	57.6405	51.8236	34.1402	49.4942	59.2587	46.3088	111.511	56.3341	78.039	73.1351	83.5682	90.5199	72.3786	78.7582
PCHAS_0832300	1.84826	1.01542	2.58249	3.4573	4.19566	2.75152	0.940755	1.88712	1.14615	1.57206	2.93516	0.903081	3.28608	10.672	2.69965	3.9366	1.71812	2.60596	1.1314	2.72157
PCHAS_0832400	3.09017	3.96133	1.79195	1.4074	1.01665	0.233352	1.91481	1.76048	0.874827	0.399971	1.35778	1.83813	3.34424	0	3.89219	3.45997	9.17978	6.29871	1.91904	3.80839
PCHAS_0832500	109.588	130.847	110.809	125.623	136.81	137.427	137.788	149.863	121.074	166.654	110.949	179.292	29.5426	39.9765	48.878	37.2677	28.3182	35.1423	70.9181	91.4984
PCHAS_0832600	18.8869	22.3489	20.4106	25.8719	19.5683	27.7566	23.2938	33.2278	23.3343	14.7052	52.8559	31.8023	27.4836	70.4658	18.3206	16.1471	23.6344	18.6408	11.6207	12.3545
PCHAS_0832700	0.483893	2.17108	0	0	0.915387	0.42022	0.431023	0	0	0	2.9341	2.48257	2.40892	0	1.23689	0.655863	5.51031	3.5819	1.03674	0.311734
PCHAS_0832800	4.34422	7.54124	3.21893	2.60715	3.69811	0.471573	2.74095	2.26398	1.76791	1.88601	5.67069	3.09551	9.91212	7.31612	6.63177	9.93617	17.3732	10.2724	4.3952	3.49829
PCHAS_0832900	478.567	472.452	481.674	552.592	483.333	587.374	548.382	639.262	493.8	593.126	282.62	496.695	100.226	284.587	176.602	178.936	123.132	162.873	304.849	424.395
PCHAS_0833000	4.19579	6.51099	2.55261	2.02409	1.671	1.53418	4.32747	2.36748	1.4379	1.64352	9.37311	4.53183	4.39738	44.6283	7.52629	11.0745	9.34033	7.62837	3.78504	3.98339
PCHAS_0833100	99.7683	134.249	108.546	112.786	81.589	125.924	178.839	194.874	147.947	211.226	646.906	256.457	189.721	425.791	290.396	82.3108	133.067	95.5631	60.1873	77.4467
PCHAS_0833200	28.5193	28.7824	20.5758	25.0592	18.5987	45.2967	42.8959	58.3336	39.7729	63.3965	104.224	61.1789	25.842	53.0852	49.665	20.6837	23.6042	17.0522	15.7223	18.1309
PCHAS_0833300	1393.63	1246.03	651.365	1558.1	490.772	4738.55	3347.61	4602.04	4794.02	4547.57	1919.35	3808.78	352.418	1037.93	882.888	455.766	457.265	239.749	203.716	626.855
PCHAS_0833400	195.938	250.863	233.412	261.66	267.058	148.807	200.98	200.927	131.279	171.911	84.6165	131.119	37.5628	63.9464	52.2617	66.1455	51.8707	81.2275	168.614	186.283
PCHAS_0833500	125.826	147.483	150.339	141.683	152.624	107.499	133.093	109.117	102.727	97.3302	113.177	108.088	34.4369	64.7486	61.5459	76.5865	51.1728	84.8032	110.454	127.782
PCHAS_0833600	21.0082	17.8066	18.7818	19.8419	17.1127	17.9447	24.1324	23.3839	20.1822	25.1188	58.7032	31.4115	3.42896	46.4	11.9332	13.3813	9.33761	11.3303	16.725	18.9327
PCHAS_0833700	92.7341	96.785	96.8064	100.651	86.1091	134.932	116.959	146.96	144.276	124.596	107.262	164.67	24.5124	66.3394	54.5402	47.0877	32.9306	40.1606	70.3302	68.7288
PCHAS_0833800	29.8385	33.9535	35.1218	31.4113	32.3756	22.2594	24.5879	17.85	19.4002	23.968	14.8115	15.5107	17.1773	23.908	20.1597	19.865	23.0942	27.5685	28.538	28.114
PCHAS_0833900	60.3502	61.4181	59.9272	60.3197	55.1859	64.6487	72.9671	83.1567	56.8701	95.2511	87.421	97.7072	30.0201	45.8796	47.6328	45.1299	36.9316	39.6197	45.9373	57.526
PCHAS_0834000	19.0951	21.268	15.8653	24.1833	17.0545	39.1454	29.5562	54.814	29.215	40.5373	33.5329	42.8265	11.6876	25.3047	16.5365	18.2441	12.2217	14.6753	14.7548	19.7629
PCHAS_0834100	69.0295	72.0241	72.5665	74.5981	65.5897	55.8487	74.719	76.503	47.4127	68.6731	59.4288	65.1518	56.549	60.0396	57.6249	61.1113	60.2702	67.4832	60.0319	70.8146
PCHAS_0834200	3.30784	6.41491	4.22327	2.55435	3.91494	1.91505	3.17308	2.92996	1.6568	2.27246	4.02858	2.90096	4.22234	6.85631	3.90242	6.20779	7.17483	6.59225	3.27094	2.51346
PCHAS_0834300	126.215	113.724	117.7	111.398	104.611	101.587	98.2157	103.676	109.333	76.647	41.8571	69.8743	17.4147	22.6227	32.4289	48.9313	45.5262	42.8123	86.7405	112.86
PCHAS_0834400	14.2247	22.3427	17.5127	16.7837	19.3982	13.0317	16.5692	23.4615	7.9729	16.9851	9.00432	12.2968	4.0854	12.6361	6.52618	7.20352	6.61156	6.94253	8.81918	11.9835
PCHAS_0834500	7.61908	18.0977	17.335	12.6172	20.6871	3.11366	7.98427	7.20727	1.94549	5.33689	4.07634	3.06581	6.13564	0	2.67308	2.73357	2.91637	6.35865	9.92235	10.1055
PCHAS_0834600	14.8393	19.6505	12.2365	19.0458	11.7475	25.0078	32.5433	45.679	22.3222	39.5107	45.5832	45.8969	7.19228	13.8564	10.599	6.70434	6.37367	5.19617	5.31635	7.69831
PCHAS_0834700	315.713	330.737	309.675	333.877	302.259	390.018	355.471	429.095	365.404	396.384	308.128	413.697	119.238	243.931	196.26	188.139	156.267	172.335	227.896	281.229
PCHAS_0834800	116.321	112.706	112.293	139.651	114.31	125.416	122.181	114.808	120.659	108.832	40.3037	65.1027	18.801	61.0587	37.5846	40.1316	39.3202	33.9197	54.8062	101.213
PCHAS_0834900	15.9947	15.2408	15.5908	13.1037	16.8924	14.5585	11.8853	8.35471	11.1386	9.4213	7.08798	9.94661	5.96123	10.3714	10.3486	14.6073	15.3058	14.3512	14.9047	13.6653
PCHAS_0835000	142.794	139.767	149.067	131.404	155.245	108.326	109.022	99.432	90.0768	115.522	48.339	69.7709	49.0248	37.9082	82.7093	95.6584	93.8332	95.4598	126.259	151.657
PCHAS_0835100	20.9139	25.6629	24.2641	21.527	25.3035	13.2087	13.7475	11.8568	11.8942	12.3188	9.71998	8.03293	12.8054	9.04073	18.1054	29.1044	20.0131	30.6309	23.003	22.6234
PCHAS_0835200	57.8575	70.488	65.7072	73.7972	68.1022	39.8919	53.4819	56.2063	28.5831	52.4896	23.7791	33.5152	23.1478	20.1814	29.0358	34.9377	32.2876	39.5783	52.4187	65.1372
PCHAS_0835300	79.0694	106.062	110.17	117.943	121.203	97.6884	120.53	128.172	93.7689	113.447	75.3758	121.28	21.3044	49.4207	36.1161	30.9356	15.9128	28.1584	66.3652	82.9713
PCHAS_0835400	137.622	157.378	144.123	170.477	153.065	185.909	196.916	251.367	177.323	226.959	194.711	218.169	29.362	70.6348	81.8958	52.1104	48.3299	43.1203	87.9886	118.212
PCHAS_0835500	374.97	360.602	357.606	405.842	368.27	441.304	413.355	427.554	396.044	503.987	209.011	344.875	62.0326	196.828	134.728	112.983	99.7239	100.013	235.263	322.946
PCHAS_0835600	199.941	224.31	259.463	213.957	263.448	126.481	160.905	148.971	97.1799	124.1	100.119	123.217	185.107	41.6027	146.46	192.872	166.607	238.098	230.083	226.447
PCHAS_0835700	43.4688	35.6466	17.6203	15.9036	28.297	14.9886	21.6374	26.2707	10.4058	16.1757	189.606	37.1689	105.016	206.7	104.576	119.567	158.067	136.83	34.2397	16.0608
PCHAS_0835800	64.4011	72.8046	59.1291	52.2105	63.5196	51.9402	61.2202	64.6838	39.8553	58.7656	91.8585	63.2547	65.6223	148.44	61.019	87.1107	104.553	92.7214	59.7629	56.7826
PCHAS_0835900	289.615	314.81	287.355	274.128	280.149	313.033	301.152	281.321	289.822	277.524	433.907	250.829	314.253	430.624	363.111	305.898	296.376	331.013	283.555	307.718
PCHAS_0836000	1.08686	1.91574	1.9328	1.42314	2.67285	0.235962	1.6942	2.75117	0.589742	2.83112	2.19674	2.32336	4.05798	5.49118	3.00967	3.49867	2.21011	2.51414	1.74645	1.75045
PCHAS_0836100	61.9871	100.84	94.8455	86.9342	116.429	64.4874	76.7958	96.3279	61.4645	70.7224	103.982	103.316	84.5869	25.4358	58.4457	46.4864	61.425	74.1451	63.37	79.4614
PCHAS_0836200	303.643	279.403	315.849	295.197	296.488	283.193	326.043	323.051	343.06	292.231	216.902	327.212	225.704	268.993	222.567	217.616	216.53	215.528	331.515	320.483
PCHAS_0836300	33.4839	38.7244	42.0238	34.5849	42.8443	18.8735	26.8615	27.1893	14.4446	24.1462	25.5364	24.8966	47.6257	25.2181	31.6307	36.9976	32.987	46.8901	37.7262	36.9789
PCHAS_0836400	168.248	194.622	201.827	177.286	171.757	179.826	248.298	273.942	227.962	240.802	318.931	309.86	137.531	261.551	206.973	169.344	136.041	203.271	152.151	191.765
PCHAS_0836500	166.291	160.407	177.925	134.984	165.032	61.8527	82.5426	38.0453	68.9954	40.0633	787.677	99.2386	1527.83	463.639	877.208	483.804	664.467	506.321	296.738	230.871
PCHAS_0836600	10.7912	18.6374	6.74468	15.0168	4.57816	35.0538	48.3422	81.4291	36.5532	85.5546	126.713	101.461	15.8465	20.0745	33.8543	9.30203	11.0177	7.68711	3.80497	6.4574
PCHAS_0836700	1505.38	1369.63	1362.67	1850.25	1142.83	1768.21	1602.57	1253.89	1685.63	1083.99	343.281	768.353	142.557	498.894	268.392	147.222	186.339	119.387	304.65	1066.17
PCHAS_0836800	7.14453	11.2722	7.08565	8.27563	8.10925	5.72716	7.343	4.5826	7.15696	3.68118	214.939	27.2559	283.168	77.7462	132.519	27.1886	58.1129	37.6302	7.06484	8.49721
PCHAS_0836900	0.835714	2.61877	1.40361	1.94539	0.562109	4.99959	2.8122	4.97749	6.65083	6.7726	3.94129	5.39915	1.38679	7.5063	2.69002	1.63615	1.20846	0.801912	0.795785	0.957127
[truncated: 3,364 more rows]

## Sheet: chab_TPM_avg
Geneid	02h	05h	08h	11h	14h	17h	20h	23h
PCHAS_0100100	76.2466	58.5012	40.1015	35.831	362.635	635.779	233.602	87.3049
PCHAS_0100200	0.595643	0.229293	0.176972	2.62664	4.0475	3.31527	1.67961	0.276822
PCHAS_0100300	0	0	0.175208	0.280317	0.446977	0	0	0.129975
PCHAS_0100400	1.06523	0.702997	2.48016	2.95199	2.16453	1.49223	0.387837	0.758859
PCHAS_0100500	57.7855	41.3589	24.0904	30.1514	1261.82	2644.34	854.905	128.723
PCHAS_0100600	1.15566	0.439324	0.919819	1.64766	2.80964	2.60788	1.15221	0.406659
PCHAS_0100651	2.2417	2.20595	1.52495	2.03371	2.64493	0.357352	3.85546	2.64781
PCHAS_0100700	16.3911	21.8326	4.77993	6.30535	57.9357	68.9122	30.3244	15.7752
PCHAS_0100800	4.50511	5.60316	5.37319	5.78104	9.11117	3.16531	4.39976	4.08216
PCHAS_0100900	243.255	241.294	201.224	170.769	252.783	305.04	226.259	220.724
PCHAS_0101000	50.6654	51.5497	45.0924	38.442	41.4288	46.2615	39.1674	42.888
PCHAS_0101100	0.860267	0.309599	0.349554	0.21422	25.1945	21.2822	3.5816	0.58255
PCHAS_0101200	370.833	339.715	488.264	568.509	964.897	521.059	368.891	305.041
PCHAS_0101300	1175.29	923.275	3864.93	5223.06	6994.85	1641.3	771.173	760.374
PCHAS_0101400	7912.31	8158.49	5699.27	4099.18	5573.72	13136.8	12386.6	10138.3
PCHAS_0101500	12.2279	7.30744	6.81695	7.33867	9.19872	15.2123	18.4889	7.41536
PCHAS_0101600	35.8165	38.0381	19.2582	19.064	23.2629	48.4423	53.3629	38.9908
PCHAS_0101700	200.049	219.853	138.419	100.866	62.9733	81.5193	149.485	207.265
PCHAS_0101800	0.340293	0.432844	0.506052	0.820482	1.09855	0.325429	0.371925	0.259411
PCHAS_0101900	53.2928	56.2531	44.2861	39.5091	24.5755	12.785	25.201	45.0231
PCHAS_0102000	61.4732	65.4996	54.5589	48.1451	34.6943	12.8155	24.721	51.4357
PCHAS_0102100	59.594	61.5951	45.5624	51.5012	51.3921	31.8001	38.3083	49.2182
PCHAS_0102200	10.0084	5.93215	3.51835	2.47616	7.99024	29.0961	33.1404	6.58199
PCHAS_0102300	11.8355	13.1959	7.72622	5.28151	6.80929	16.0618	16.9177	9.55718
PCHAS_0102400	75.8777	87.5182	48.9807	67.4569	114.36	85.3737	77.8962	66.8762
PCHAS_0102500	49.7567	55.0199	30.5539	35.3668	79.5832	60.4032	58.2132	44.9816
PCHAS_0102600	96.3669	110.249	102.404	105.593	99.9225	51.7004	59.0566	82.2327
PCHAS_0102700	73.3618	79.5104	55.5921	52.9323	29.04	20.9493	23.0748	57.7447
PCHAS_0102800	114.442	121.469	62.7935	53.7728	80.2213	175.516	186.576	157.404
PCHAS_0102900	30.6643	35.1755	21.0666	25.3787	34.4107	40.8951	36.4754	30.6017
PCHAS_0103000	59.8001	46.1776	129.311	150.259	98.9536	21.6759	14.0857	23.2018
PCHAS_0103100	1.62444	0.887816	0.407824	0.849933	1.37744	3.3043	2.66989	0.928672
PCHAS_0103200	29.6839	36.8398	16.0027	16.5356	15.4691	7.65055	12.7048	24.7937
PCHAS_0103300	14.1557	13.904	16.3746	18.3172	39.8726	14.5447	9.56027	11.8697
PCHAS_0103400	3.89881	1.69579	0.28641	0.796414	4.41703	10.364	7.64503	1.79206
PCHAS_0103500	7.30891	8.93168	2.8351	2.84303	2.30132	2.19946	2.56852	6.43396
PCHAS_0103600	3.40276	0.868613	1.82382	4.43479	33.1857	20.6851	8.06849	1.17649
PCHAS_0103700	134.918	141.824	106.918	84.5313	46.9812	43.3271	44.1589	110.314
PCHAS_0103800	44.4338	43.7557	34.2003	35.0407	26.3435	20.8782	27.829	34.3387
PCHAS_0103900	28.5169	7.87012	4.1685	4.23931	28.6534	103.331	100.179	11.542
PCHAS_0104000	225.761	228.081	143.373	132.422	132.97	250.869	257.696	246.426
PCHAS_0104100	149.669	125.659	212.423	222.213	120.645	50.3899	29.5014	88.8425
PCHAS_0104200	2.85307	3.1479	1.0893	0.781801	1.235	1.20693	2.51052	2.56183
PCHAS_0104300	99.709	115.437	96.0694	81.3262	51.3317	29.0648	35.8203	76.1649
PCHAS_0104400	184.807	192.684	155.403	114.898	62.0234	48.5357	85.0709	149.639
PCHAS_0104500	118.533	121.971	134.899	150.791	182.808	120.22	101.796	114.859
PCHAS_0104600	165.081	158.012	193.313	204.721	215.919	58.2551	63.4179	110.049
PCHAS_0104700	44.0704	33.6513	72.0992	79.1001	85.3404	46.588	34.0115	23.6567
PCHAS_0104800	3.725	5.98268	5.07538	4.77983	4.95979	6.47118	2.19511	2.06154
PCHAS_0104900	29.1403	26.1308	20.305	25.9088	21.2872	8.29358	12.1101	23.5459
PCHAS_0105000	0.798566	0.232686	0.256694	0.153666	0.848054	1.30967	2.80683	0.473086
PCHAS_0105100	32.1252	8.3947	4.37142	4.13571	27.9407	96.6018	140.928	14.3285
PCHAS_0105200	21.7042	19.1974	20.0923	18.2486	11.8108	9.55434	6.05774	7.999
PCHAS_0105300	5.76749	2.99885	2.78416	2.61628	6.91792	24.0583	14.952	4.20505
PCHAS_0105400	37.9683	43.8235	18.3652	17.5867	43.1544	69.7439	49.4913	41.6566
PCHAS_0105500	219.565	216.541	196.946	158.371	95.2378	66.9881	97.2104	172.712
PCHAS_0105600	205.31	183.054	205.962	197.14	159.971	291.726	281.182	199.656
PCHAS_0105700	128.702	28.6192	19.3326	15.4681	81.1981	399.116	480.047	58.1751
PCHAS_0105800	97.6689	101.492	78.1877	76.1473	63.2153	86.5128	95.5772	97.408
PCHAS_0105900	71.5082	69.4372	40.1446	36.9886	36.702	54.6075	69.8581	64.3085
PCHAS_0106000	138.28	135.696	139.551	142.397	98.8361	62.3668	78.2538	110.601
PCHAS_0106100	137.68	163.54	73.6907	47.5409	47.3818	54.5803	95.9294	142.843
PCHAS_0106200	253.653	270.44	124.215	135.041	146.831	193.061	236.63	262.352
PCHAS_0106300	1.79026	0.589489	0.114121	0.499578	1.43416	5.95933	4.01368	1.48378
PCHAS_0106400	53.1328	36.114	26.898	22.7698	27.1138	88.232	93.9284	34.372
PCHAS_0106500	4.35123	4.09648	1.64458	2.68592	2.47252	2.22699	1.26389	1.64031
PCHAS_0106600	69.6142	70.6431	72.1236	76.999	63.153	39.6628	46.6939	56.7537
PCHAS_0106700	48.7202	51.2651	30.4759	28.3749	16.6158	21.6452	36.0604	56.502
PCHAS_0106800	9.2092	6.12335	5.06432	6.20624	5.1021	17.3305	14.8976	6.72404
PCHAS_0106900	26.1272	7.69427	20.7248	33.3615	55.0285	58.147	56.5572	9.73854
PCHAS_0107000	26.5349	29.8927	14.1881	8.69483	5.26912	6.94701	13.5849	24.7756
PCHAS_0107100	52.0206	55.4938	40.8778	30.9865	16.3317	7.45422	12.4167	35.6349
PCHAS_0107200	113.405	119.014	84.7652	66.1831	33.6386	43.4095	51.2884	110.759
PCHAS_0107300	69.6273	72.5535	58.5818	54.1755	35.0203	23.6324	31.7101	54.9817
PCHAS_0107400	44.2777	52.0152	30.6692	28.4131	23.1436	7.79079	24.7282	38.2916
PCHAS_0107500	32.183	36.5218	19.0013	13.0483	7.74953	17.0503	20.2093	34.3213
PCHAS_0107550	12.0883	12.6015	12.0375	15.983	17.2612	5.07595	4.9154	8.98829
PCHAS_0107600	239.341	230.892	284.854	342.384	347.924	171.012	107.976	193.346
PCHAS_0107700	703.308	716.566	733.658	747.546	442.459	207.245	232.858	544.666
PCHAS_0107800	23.1195	18.4127	31.0555	20.9979	16.7223	16.9458	28.8743	20.1992
PCHAS_0107900	387.727	419.476	246.446	193.642	118.83	150.78	192.53	367.107
PCHAS_0108000	1269.72	1213.06	952.158	928.763	523.245	594.32	1367.06	1814.34
PCHAS_0108100	32.5467	34.8201	28.2198	26.9419	20.3501	21.6465	22.9052	27.0047
PCHAS_0108200	14.6623	13.5394	12.6188	17.3962	20.745	10.5827	11.0401	12.2048
PCHAS_0108300	290.61	270.638	230.304	194.592	131.889	201.321	261.391	268.767
PCHAS_0108400	21.7195	24.0156	11.9601	8.67802	8.66359	8.63459	14.6885	21.2516
PCHAS_0108500	46.3375	49.0595	42.9977	46.624	60.5963	47.0642	59.261	47.1445
PCHAS_0108600	12.9785	14.9098	6.02967	3.31012	6.99395	16.0129	15.9603	15.7238
PCHAS_0108700	3.88704	4.20926	1.7305	1.3638	3.88447	5.8225	5.46948	2.98727
PCHAS_0108800	46.7979	45.893	23.6976	17.8737	58.0912	80.3603	67.3192	50.5496
PCHAS_0108900	34.2116	7.97435	8.65951	11.0383	75.376	145.442	125.071	19.4135
PCHAS_0109000	13.1465	13.1286	10.783	10.8263	8.39959	3.02292	6.60872	10.0746
PCHAS_0109100	136.877	158.146	116.712	88.2523	47.7328	53.7456	71.611	131.02
PCHAS_0109200	92.6626	96.9604	101.199	114.535	131.585	72.0462	66.0011	77.0595
PCHAS_0109300	192.988	182.982	176.853	198.811	238.528	201.875	190.495	181.201
PCHAS_0109400	443.539	264.162	1326.88	1671.41	2342.87	982.34	393.954	190.324
PCHAS_0109500	267.694	291.661	240.185	180.206	94.0723	40.3685	70.899	208.257
PCHAS_0109600	201.175	242.363	159.54	223.611	212.626	54.9923	54.6422	127.716
PCHAS_0109700	303.118	295.588	339.298	360.859	253.926	119.555	115.191	227.878
PCHAS_0109800	94.8073	95.1569	69.5646	91.0055	106.713	76.1538	77.6872	82.8126
PCHAS_0109900	58.7826	66.7745	32.9933	32.8205	53.4562	53.856	71.9014	74.8617
PCHAS_0110000	81.9029	78.5477	186.799	250.039	324.698	83.4835	48.1535	38.7483
PCHAS_0110100	101.158	118.48	89.4061	87.2027	76.5941	34.4494	36.952	90.8187
PCHAS_0110200	294.818	282.81	413.155	458.578	417.005	148.206	125.703	222.845
PCHAS_0110300	29.9096	35.1295	28.0812	32.942	45.7341	29.9447	26.798	28.0272
PCHAS_0110400	10.2975	3.14207	1.45832	0.982231	15.4638	37.2354	32.395	5.70012
PCHAS_0110500	21.8975	5.71146	4.80517	4.76444	45.8246	70.8989	70.3908	9.91714
PCHAS_0110600	4879.26	4753.97	4283.22	4158.38	3216.2	4517.2	5167.09	5324.35
PCHAS_0110700	21.687	12.3467	37.6612	66.6807	133.255	42.4269	27.8975	13.8863
PCHAS_0110800	137.38	133.557	181.085	175.944	148.054	50.4516	54.7583	84.5915
PCHAS_0110900	23.4394	24.4798	103.112	158.547	263.943	83.8154	34.9134	16.9784
PCHAS_0111000	106.15	128.319	70.2529	70.2467	68.3018	99.351	88.2972	109.767
PCHAS_0111100	15.584	3.46951	3.99017	6.21752	37.8735	48.5213	44.3446	7.11906
PCHAS_0111200	27.8882	23.7264	16.3537	13.3264	16.8627	12.1268	17.3971	24.1082
PCHAS_0111300	6.94708	5.61152	3.88429	3.44829	5.99642	19.5754	8.41221	2.79019
PCHAS_0111400	61.4971	16.9059	11.2243	7.98027	71.7763	165.538	207.39	33.9529
PCHAS_0111500	28.4142	31.1718	14.7553	15.0563	16.7727	25.3498	32.4413	36.745
PCHAS_0111600	16.6343	12.5534	17.3606	28.3494	259.832	240.131	51.1094	16.6104
PCHAS_0111700	43.5901	46.5117	29.0499	39.3405	87.5708	68.9298	53.4167	44.7874
PCHAS_0111800	140.728	154.082	89.4332	80.2916	112.307	231.082	209.887	172.43
PCHAS_0111900	1018.06	1231.23	844.462	726.942	460.813	329.009	449.037	936.815
PCHAS_0112000	347.509	359.08	285.297	256.568	218.198	285.365	390.875	374.482
PCHAS_0112100	125.993	136.593	102.597	90.5508	79.0922	53.004	50.8746	80.5688
PCHAS_0112200	1.96816	2.85861	3.09896	3.29176	27.5152	15.3569	3.92831	2.27671
PCHAS_0112300	149.661	155.721	183.911	189.698	120.913	57.317	49.2786	118.69
PCHAS_0112400	22.7413	25.1613	18.1997	15.3346	12.0906	11.2018	13.5953	20.6861
PCHAS_0112500	2.83384	1.6359	1.54855	2.05961	34.1629	28.822	6.80342	2.13661
PCHAS_0112600	41.6282	44.0466	30.9109	28.6359	40.3635	42.9654	45.2514	40.908
PCHAS_0112700	3.15612	0.995015	10.0429	22.6172	94.2121	21.3635	6.46086	1.61788
PCHAS_0112800	3.2529	0.881013	1.10799	2.29228	108.601	98.9073	21.224	2.31908
PCHAS_0112900	1.02112	0.543704	0.5704	0.920238	13.62	8.45941	3.52314	0.910918
PCHAS_0113000	15.0057	15.264	6.80149	5.10982	94.8679	133.382	64.3114	22.3417
PCHAS_0113100	69.8491	73.4171	47.2215	43.7378	115.783	152.394	137.732	98.7244
PCHAS_0113200	36.9429	28.127	115.509	173.736	434.28	186.312	92.1608	36.8065
PCHAS_0113300	0.509473	0.13601	0.670073	0.753044	0.807269	0.290518	0.346847	0.144289
PCHAS_0113400	44.3116	41.0262	30.3933	27.3238	44.0818	106.625	77.5149	62.6662
PCHAS_0113500	18.181	6.63188	132.922	220.386	495.38	163.642	49.0483	12.5394
PCHAS_0113600	43.6823	39.3595	17.2901	15.6508	124.082	288.407	187.766	70.3686
PCHAS_0113700	25.3968	21.268	13.7857	14.8535	54.8067	125.807	87.1185	38.1044
PCHAS_0113800	5.3259	4.30343	2.82881	1.50653	42.2124	96.8246	37.8781	6.16956
PCHAS_0113900	3.27226	1.54128	0.439784	0.938138	44.3397	89.2729	35.5334	4.66018
PCHAS_0114000	60.9135	52.1212	33.1984	29.8189	247.66	847.966	484.517	118.337
PCHAS_0114100	246.391	250.809	139.414	96.001	258.872	814.583	508.769	296.795
PCHAS_0114200	298.665	278.284	148.828	112.645	1013.07	2947.41	1803.52	609.405
PCHAS_0114300	0.765375	0.580839	0.355691	0.169319	12.4412	8.41515	2.0719	0.693225
PCHAS_0114400	25.3047	22.1148	21.7348	19.489	113.249	218.934	101.713	32.9084
PCHAS_0114500	5.45225	1.33961	38.5701	52.7719	72.7823	14.1881	6.65678	2.47118
PCHAS_0114600	103.36	114.895	72.5005	60.952	93.0845	195.114	194.01	131.104
PCHAS_0114700	16.7045	10.836	7.58032	5.7632	124.661	435.064	167.694	37.5337
PCHAS_0114800	1.19603	1.58765	2.91947	2.21633	0.756814	2.0114	0.609009	0.916047
PCHAS_0114900	1.13774	1.45347	1.56988	1.98246	2.32162	1.17613	1.80463	0.812737
PCHAS_0115000	1.68725	0.889188	3.23878	4.42993	2.12519	4.75723	3.53403	0.686983
PCHAS_0115100	0.79797	0.234813	2.01156	1.76261	1.28347	0.323395	0.327567	0
PCHAS_0115200	1.5977	1.70157	1.73674	2.78036	2.90033	1.23117	1.11557	0.425199
PCHAS_0115300	0.129317	0.286806	1.23997	2.14831	3.66213	0.511206	0.0911526	0.259951
PCHAS_0115400	2.50234	0.151378	2.36883	4.13856	33.4633	37.1531	13.4324	1.3596
PCHAS_0200001	43.0392	37.9236	16.6637	8.59149	31.5146	134.233	106.318	53.8213
PCHAS_0200005	10.2723	6.6913	18.6826	33.3598	121.048	35.3655	17.0527	6.64111
PCHAS_0200011	4.61156	2.79638	18.9279	29.5102	120.894	26.2482	7.01624	3.43316
PCHAS_0200015	2.05808	1.9303	5.95802	12.3663	61.9542	16.7519	4.24649	2.27911
PCHAS_0200021	8.34603	6.64679	12.2283	23.8749	82.1087	19.7452	3.78302	5.20066
PCHAS_0200025	4.51185	1.40703	6.88425	18.3702	138.558	32.834	7.06041	2.83584
PCHAS_0200031	4.56634	2.78354	10.0684	28.433	228.535	64.2424	11.661	3.96886
PCHAS_0200035	0.746691	0.586017	1.06511	0.734121	0.866014	0.169256	0.179205	0.450236
PCHAS_0200041	1724.35	1804.68	1155.51	1019.09	1324.22	4365.35	4329.6	2944.87
PCHAS_0200045	63.7545	79.0835	40.0125	47.4329	67.8497	43.0831	102.255	139.502
PCHAS_0200051	262.139	236.192	137.985	98.598	243.874	606.485	501.138	310.699
PCHAS_0200055	0.237077	0.100971	0.393288	0.676078	0.522316	0.145397	0.249256	0.128151
PCHAS_0200061	9.22087	5.02745	3.80219	3.6939	286.831	489.43	140.842	14.201
PCHAS_0200065	35.8458	10.6917	216.993	364.637	778.126	180.004	52.2961	15.1746
PCHAS_0200071	33880.3	35980.6	36518.7	36305.1	36413.6	33299.3	36232.9	40913.9
PCHAS_0200100	7.05207	6.26908	5.61364	3.82562	7.2734	4.75023	9.87237	9.13727
PCHAS_0200200	44.2627	57.1121	19.8277	19.3518	16.0945	15.485	24.4153	45.3031
PCHAS_0200300	395.385	425.033	384.659	354.653	255.688	190.799	225.076	353.998
PCHAS_0200400	111.484	121.603	61.4012	49.7049	49.3095	83.1049	121.881	143.753
PCHAS_0200500	5.40306	6.13801	5.94085	2.79688	3.93407	9.75918	4.84549	5.19724
PCHAS_0200600	51.6616	62.5096	35.5635	33.9032	34.3576	24.1895	41.8006	56.5768
PCHAS_0200700	176.967	194.172	167.819	157.857	128.719	94.0616	121.351	161.296
PCHAS_0200800	17.3256	9.42392	47.1822	73.2353	161.274	34.9628	14.2432	6.56171
PCHAS_0200900	6.29727	4.55317	14.5162	24.5353	51.3809	8.61428	5.54635	3.2402
PCHAS_0201000	106.443	115.186	87.8024	76.7472	58.6001	31.26	40.534	98.2354
PCHAS_0201100	7.92938	5.42441	3.11826	1.94794	5.4574	9.94218	11.6546	5.16912
PCHAS_0201200	82.4656	81.4934	63.2465	53.2353	39.1117	84.9455	92.1619	84.1214
PCHAS_0201300	177.481	161.944	176.352	187.614	191.088	265.596	237.382	159.823
PCHAS_0201400	832.356	710.191	1673.51	2107.07	1502.29	494.376	330.811	499.024
PCHAS_0201500	28.9664	25.1527	22.4898	19.219	30.842	44.832	39.7717	30.0448
PCHAS_0201600	73.0401	67.2498	73.3529	84.0311	78.8873	58.3546	63.9952	63.702
PCHAS_0201700	143.694	138.442	135.797	131.605	104.222	108.278	152.609	146.593
PCHAS_0201800	86.9788	94.1483	104.551	106.493	60.7963	39.8825	39.1774	64.1722
PCHAS_0201900	26.0246	28.512	21.9099	21.0731	16.0807	10.0663	10.5133	20.5069
PCHAS_0202000	57.0956	26.4601	14.6647	15.9559	49.5073	205.727	182.123	25.7372
PCHAS_0202050	72.515	57.5067	75.8093	76.907	77.8218	36.3658	39.7073	42.1306
PCHAS_0202150	2.15778	1.14814	4.5459	6.33056	17.4784	3.60496	2.46218	1.32278
PCHAS_0202200	131.844	150.448	90.1927	89.4873	83.505	106.725	107.591	138.029
PCHAS_0202300	118.723	132.146	93.702	100.769	121.417	155.985	150.671	129.028
PCHAS_0202400	67.9141	72.1826	32.1662	25.9676	19.2575	54.163	53.22	71.8068
PCHAS_0202500	138.909	151.994	122.864	115.789	58.0222	41.5101	91.4113	126.149
PCHAS_0202600	163.119	198.482	207.251	206.48	170.829	83.282	54.9261	108.781
PCHAS_0202700	1.96539	4.14222	2.47648	2.19785	3.3451	4.17784	2.65831	2.83562
PCHAS_0202800	254.514	151.307	102.249	101.626	148.548	440.73	501.278	169.599
PCHAS_0202900	105.373	22.4559	14.2102	14.2592	90.1596	283.229	305.248	42.5255
PCHAS_0203000	7.60203	2.85766	5.06648	6.22656	156.824	160.772	40.9929	5.71842
PCHAS_0203100	81.2902	82.3145	103.966	128.47	152.143	64.5079	60.1872	71.4091
PCHAS_0203200	106.679	97.3597	145.974	169.807	185.93	114.566	99.7839	93.3583
PCHAS_0203300	91.8665	90.3492	66.6038	52.9374	65.9441	71.8142	43.8749	77.1985
PCHAS_0203400	699.802	669.237	336.581	231.47	1710.87	4094.23	2491.04	1159.11
PCHAS_0203500	112.679	114.946	128.951	119.654	141.617	173.532	125.218	112.29
PCHAS_0203600	390.68	369.329	344.586	404.923	513.685	319.13	298.655	337.963
PCHAS_0203700	40.321	45.117	31.992	31.1248	23.9809	16.3612	17.2572	34.0982
PCHAS_0203800	624.395	636.961	737.362	722.275	433.65	199.113	225.463	480.052
PCHAS_0203900	74.0203	83.9946	54.0553	36.4201	20.6442	35.0453	64.0451	85.6424
PCHAS_0204000	25.774	27.9094	15.7412	12.9318	6.24125	10.7335	9.53556	21.4169
PCHAS_0204100	18.8486	21.8866	20.0741	17.5845	9.44146	5.46702	5.65229	12.2096
PCHAS_0204200	8.76169	1.44102	0.810876	0.844483	6.92533	19.3528	24.1261	3.3931
PCHAS_0204300	184.962	187.632	160.954	165.621	210.174	170.237	158.207	165.99
PCHAS_0204400	225.371	274.136	250.879	310.965	365.613	81.7026	59.4992	159.512
PCHAS_0204500	60.8283	77.3031	44.4071	31.0387	23.0552	19.1263	34.0045	63.9033
PCHAS_0204600	23.2244	28.0187	11.7002	9.06767	7.38107	5.58449	10.1572	23.7893
PCHAS_0204700	79.1514	70.1306	197.563	281.294	597.025	204.233	95.4045	64.2008
PCHAS_0204800	19.5307	19.3558	15.3616	14.1372	11.8466	5.40542	8.21728	16.8144
PCHAS_0204900	133.784	97.3627	277.445	305.052	237.037	75.9832	33.1113	53.346
PCHAS_0205000	40.7436	45.4984	17.0378	11.7338	30.4643	71.0039	63.4231	48.5556
PCHAS_0205100	1.25263	1.13457	0.604979	2.04591	3.52284	1.98458	0.985164	0.914401
PCHAS_0205200	17.0266	14.1246	27.1878	32.4631	34.4978	11.672	5.1911	7.94991
PCHAS_0205300	94.4003	101.718	48.8507	29.1545	42.6195	132.562	143.355	110.478
PCHAS_0205400	203.764	193.389	250.045	279.712	238.883	104.32	86.8468	142.796
PCHAS_0205500	8.72565	4.80815	12.7331	13.5103	43.2936	27.2155	19.3893	6.1257
PCHAS_0205600	68.0071	78.8691	44.0448	37.7034	33.1991	38.4822	45.5534	66.8927
PCHAS_0205700	1.84868	1.3889	8.66971	16.6353	49.8504	7.36303	3.26489	1.10215
PCHAS_0205800	14.4343	16.6702	9.89485	8.94119	5.89613	2.91716	8.53247	15.4982
PCHAS_0205900	7.37201	2.30397	24.2766	47.2114	167.913	35.9485	13.9603	3.77164
PCHAS_0206000	1.62645	0.781186	1.35427	1.25802	1.50959	2.53809	2.84074	0.824757
PCHAS_0206100	26.8931	28.0025	20.6936	19.7277	17.0454	14.8355	19.4541	23.405
PCHAS_0206200	48.0932	59.9429	35.6307	31.5992	22.094	9.37194	15.8409	42.1034
PCHAS_0206300	4.27448	1.45147	7.36524	8.00506	71.6885	47.2977	12.7594	2.29463
PCHAS_0206400	73.0084	34.8646	272.319	409.532	446.053	117.185	64.1849	23.1355
PCHAS_0206500	46.3954	63.2186	18.4953	12.5654	11.9587	16.1562	31.3871	51.5564
PCHAS_0206600	170.591	168.529	194.919	215.166	160.092	58.2764	65.8849	128.68
PCHAS_0206700	1.1724	0.285485	0.526481	0.930984	20.8147	24.1415	6.39075	0.394981
PCHAS_0206800	0.767438	0.147372	0.0855909	0.0953518	1.36694	2.18446	1.83273	0.727978
PCHAS_0206900	10.2923	11.9678	5.56147	4.23152	3.56674	4.38882	10.0038	11.6893
PCHAS_0207000	78.6593	92.9722	55.8291	43.8832	31.0553	23.2821	43.7105	66.6822
PCHAS_0207100	83.4733	85.0666	72.2539	73.747	53.0668	28.7287	33.7205	77.8342
PCHAS_0207200	71.1885	74.8911	35.5532	34.8492	65.4734	120.053	104.932	80.4544
PCHAS_0207300	50.3304	56.7691	32.2506	35.2678	326.874	199.846	44.2499	36.6226
PCHAS_0207400	0.992117	0.699928	0.9829	1.86526	23.0977	11.4745	3.49007	0.688667
PCHAS_0207500	0.486555	0.208229	0.32961	0	0.383572	0	1.30692	0
PCHAS_0207600	95.3859	109.25	105.011	123.712	149.115	52.1427	43.7481	75.7706
PCHAS_0207700	20.7998	4.35496	4.45382	4.06458	16.4185	84.0102	78.7804	11.1616
PCHAS_0207800	39.2847	43.2277	29.633	26.676	14.5112	7.04393	15.4806	27.3435
PCHAS_0207900	50.17	54.7958	29.7026	23.5968	12.7021	13.9067	33.7403	49.2193
PCHAS_0208000	14.0394	13.3995	11.7571	10.7711	5.29509	3.3057	3.61286	9.11758
PCHAS_0208100	0.436159	0.294336	0.510911	0.260862	0.60095	1.13479	0.803807	0.422614
PCHAS_0208200	37.6789	41.9645	35.023	31.6035	21.0271	19.1631	22.7407	30.0293
PCHAS_0208300	44.2667	54.8795	26.4755	24.0161	34.3662	52.7435	58.0494	58.8822
PCHAS_0208400	33.3374	32.4128	34.0761	39.8022	36.923	15.2845	14.9659	23.8335
PCHAS_0208500	5.45514	2.96168	16.1754	21.0377	51.2248	16.9396	18.3173	4.17465
PCHAS_0208600	167.147	191.002	106.958	96.3228	76.6244	110.089	143.761	182.984
PCHAS_0208700	1.03491	1.73356	0.646283	0.98032	0.393397	1.12385	2.1027	1.50116
PCHAS_0208800	23.1481	20.0296	32.7898	44.0096	66.9918	15.1616	13.2457	14.8009
PCHAS_0208900	13.1225	12.0785	10.3099	15.0213	20.0955	8.63349	10.1986	11.3846
PCHAS_0209000	89.0867	93.8907	68.3752	73.4692	52.633	40.6132	49.3782	77.725
PCHAS_0209100	19.9189	17.1013	24.3734	31.6356	42.3264	14.9877	10.8969	10.2271
PCHAS_0209200	96.7193	102.555	96.2976	100.914	106.231	43.7226	50.8086	79.2806
PCHAS_0209300	81.817	81.3128	75.8894	92.5429	79.6898	35.5797	43.4421	79.5907
PCHAS_0209400	75.7563	84.6987	45.7784	41.818	44.7203	61.2987	84.1717	95.9188
PCHAS_0209500	22.4809	19.8535	25.0303	29.2277	29.8654	11.8433	17.5515	19.8374
PCHAS_0209600	34.8188	35.2678	41.2472	40.3958	34.2947	17.8178	15.5783	26.6116
PCHAS_0209700	48.5776	48.4956	34.0125	25.8093	24.687	43.8023	46.7891	51.2074
PCHAS_0209800	25.969	31.1876	17.3778	15.8351	9.89528	8.73864	9.08103	26.0109
PCHAS_0209900	809.412	804.796	911.458	879.289	477.418	280.415	312.279	641.715
PCHAS_0210000	20.7878	19.3175	21.3554	25.1255	20.7278	11.0517	12.4795	15.7832
PCHAS_0210100	13.307	12.9025	10.5967	7.62752	5.71805	6.72161	8.43479	14.3486
PCHAS_0210200	23.2059	22.6691	15.7317	17.3004	12.3119	10.9395	13.6467	17.6873
PCHAS_0210300	37.0561	41.2541	31.8814	35.5724	37.7476	18.3205	19.4188	28.6874
PCHAS_0210400	20.9074	22.313	10.7582	10.4711	17.6011	15.7311	16.4083	18.808
PCHAS_0210500	730.112	745.112	500.372	400.662	313.562	636.755	801.718	831.494
PCHAS_0210600	4.97026	4.49082	5.80092	9.30872	12.2602	2.29398	1.75106	2.50451
PCHAS_0210700	13.4277	11.0817	14.8281	18.4317	22.2092	6.86775	7.29171	6.3355
PCHAS_0210800	112.575	128.596	106.945	104.186	68.4309	38.0079	43.3846	92.9029
PCHAS_0210900	90.2102	103.37	51.1001	48.164	37.7846	36.3934	35.0192	71.3642
PCHAS_0211000	4.45871	2.09649	2.42798	1.78085	4.685	15.612	6.54443	2.82834
PCHAS_0211100	58.3999	54.6546	39.3957	35.0409	28.1933	28.2097	35.866	47.1359
PCHAS_0211200	6.10211	3.0593	3.90048	6.98403	35.2676	21.7062	9.30505	2.50289
PCHAS_0211300	37.2436	36.3899	49.9609	59.2772	71.6137	14.3302	9.81194	21.5126
PCHAS_0211400	118.102	115.003	159.849	163.262	119.414	75.8033	73.856	86.3983
PCHAS_0211500	227.797	241.362	197.557	194.9	144.857	151.95	178.338	201.428
PCHAS_0211600	9.4539	3.13046	16.4606	33.2731	71.073	23.2994	14.7259	3.89685
PCHAS_0211700	51.4429	55.566	42.3719	39.0915	30.2051	34.0589	53.7003	56.3157
PCHAS_0211800	88.6489	93.3567	51.2277	45.2611	68.8611	126.964	123.777	99.2618
PCHAS_0211900	83.3864	83.128	37.8399	27.1895	47.3412	122.666	116.956	91.6537
PCHAS_0212000	68.0768	69.3972	59.756	60.674	51.4859	67.9916	65.6268	65.3682
PCHAS_0212100	205.219	216.541	191.135	146.167	90.2844	100.921	113.674	206.959
PCHAS_0212200	22.964	22.6282	14.0723	11.8134	19.0939	16.2736	18.098	21.2698
PCHAS_0212300	4.2918	1.50887	1.36383	1.59018	12.0441	13.5456	14.5462	2.89288
PCHAS_0212400	1.17363	0.36708	0.443195	0.49812	1.30982	4.40707	2.89159	0.771985
PCHAS_0212500	123.88	132.234	111.295	104.445	62.7633	37.2505	79.5183	124.411
PCHAS_0212600	48.2874	54.4052	25.2414	30.1176	28.3388	19.2738	30.8551	44.6101
PCHAS_0212700	113.25	113.49	96.5261	88.5522	56.1705	63.026	79.1745	96.3121
PCHAS_0212800	192.392	168.747	234.346	245.851	223.517	89.0619	39.4648	87.9514
PCHAS_0212900	115.359	103.708	266.087	302.931	508.509	176.983	117.464	89.0885
PCHAS_0212920	2.49569	1.36918	4.39031	14.9336	19.4007	39.9477	8.04068	3.56468
PCHAS_0212940	1.62185	4.70144	4.45129	2.83537	9.9331	3.53676	4.47019	1.80709
PCHAS_0213000	388.175	329.414	467.66	556.817	421.025	352.79	321.118	324.069
PCHAS_0213100	88.9042	27.7155	626.484	1045.1	1770.85	371.059	120.621	39.0753
PCHAS_0213200	886.718	939.023	747.042	714.442	1011.66	1319.11	1138.2	964.984
PCHAS_0213300	137.595	85.218	628.309	1007.95	2279.07	535.327	184.854	89.3441
PCHAS_0213400	109.603	76.4434	274.476	394.092	656.787	303.081	212.889	94.4614
PCHAS_0213500	222.728	224.576	194.768	164.847	242.675	289.862	220.528	205.081
PCHAS_0213600	27.0124	25.0189	11.237	8.28862	159.36	314.469	138.831	42.8863
PCHAS_0213700	15.4911	16.6264	11.5734	13.9509	76.2904	70.823	32.4653	20.367
PCHAS_0213800	1.45416	1.28933	1.27898	0.972187	5.46496	6.3026	3.36747	3.1336
PCHAS_0213821	20.9775	15.4884	49.5681	63.4781	99.2381	25.7856	8.91994	12.7417
PCHAS_0213841	5.84436	3.37473	15.3529	32.8409	114.552	18.4455	3.62292	4.02326
PCHAS_0213861	5.80259	1.28481	10.877	18.3457	57.3885	8.62511	4.82591	2.80937
PCHAS_0213881	5.75675	1.76851	1.09934	1.98321	75.6382	99.0037	27.7982	4.69775
PCHAS_0300100	77.9843	82.2213	45.6894	34.6769	51.5753	180.347	169.5	131.464
PCHAS_0300200	0	0.113322	1.09934	0.702955	0.875113	0.288715	0	0.13307
PCHAS_0300300	0.107675	0	0.191821	0.711528	1.2388	0	0	0
PCHAS_0300400	0.679301	0.704138	1.58212	3.29814	3.44028	0.442055	0	0.127851
PCHAS_0300600	0.0954851	0.139953	0.331683	0.983131	0.0964961	0	0.0862796	0.272769
PCHAS_0300700	19.8155	18.6199	29.9957	31.8895	31.7244	17.2279	16.3901	14.2814
PCHAS_0300800	6.95562	5.72839	23.7963	31.5365	21.6639	2.56173	1.94666	2.26701
PCHAS_0300900	22.8939	4.98245	189.458	279.756	265.204	48.5596	14.997	5.30403
PCHAS_0301000	304.559	244.828	795.549	984.487	964.808	203.541	117.633	188.194
PCHAS_0301100	14.301	4.68465	136.194	216.349	262.175	41.5261	12.7168	5.33833
PCHAS_0301200	17.2311	5.54455	140.812	215.832	308.922	35.32	16.5285	5.75475
PCHAS_0301300	0	0	0	0	0	0	0	0
PCHAS_0301400	88.341	72.4203	81.2299	74.0987	24.1613	10.9736	11.0808	42.1959
PCHAS_0301500	48.8787	44.7912	62.3449	61.5519	32.201	13.4296	14.6051	33.729
PCHAS_0301600	57.8076	35.5459	148.363	164.951	92.6895	17.8247	10.5012	21.0065
PCHAS_0301700	129.792	97.8493	167.19	176.385	87.9365	22.7469	17.0482	54.0468
PCHAS_0301800	10.3532	2.71519	74.0931	92.7544	101.697	12.9373	7.22622	1.94751
PCHAS_0301900	118.917	84.3416	152.033	145.83	70.2592	16.4474	12.7923	42.7981
PCHAS_0302000	35.9927	28.8407	41.1756	33.5157	11.6699	5.65399	4.42748	13.9654
PCHAS_0302050	499.796	468.735	766.301	889.531	641.072	283.001	280.533	402.763
PCHAS_0302100	20.7063	6.37661	179.83	244.406	222.916	50.0688	14.8058	6.04095
PCHAS_0302300	23.7479	20.5878	44.267	62.6839	78.4286	33.635	9.78382	10.9612
PCHAS_0302400	94.6195	37.1567	537.036	808.223	1111.89	214.392	84.5143	34.5897
PCHAS_0302500	97.6668	38.2365	583.963	793.795	1252.92	309.293	98.6771	43.6586
PCHAS_0302700	5.88551	5.46268	6.89545	9.72464	5.31353	2.51483	0.623452	3.88393
PCHAS_0302800	1482.51	1349.62	2088.8	1967.11	1070.83	401.835	284.96	853.116
PCHAS_0302900	28.4687	18.6735	12.1733	14.1929	32.1742	47.5477	54.7607	20.0903
PCHAS_0303000	43.6773	56.9944	32.5648	41.571	45.3602	15.163	19.2099	34.0055
PCHAS_0303100	61.5227	75.5526	74.2421	66.4807	49.6264	20.5836	13.7456	48.5601
PCHAS_0303200	26.2726	25.9941	15.7536	18.0643	23.0066	16.6075	16.2315	22.4685
PCHAS_0303300	124.824	117.836	118.397	110.16	122.158	100.571	97.6815	111.604
PCHAS_0303400	72.6812	85.1382	96.6927	112.459	111.904	48.0769	34.4368	54.2902
PCHAS_0303500	734.866	445.726	1682.77	2021.19	1851.33	904.237	637.362	294.591
PCHAS_0303520	5.41738	2.20883	0	1.00472	5.60584	0	1.1432	3.61419
PCHAS_0303600	75.4461	77.2564	77.8422	75.2724	45.4083	20.1206	13.6846	45.5099
PCHAS_0303700	133.957	137.996	92.0987	82.5427	99.6788	206.88	203.703	157.041
PCHAS_0303800	80.8079	16.749	15.5008	15.2182	69.5855	319.757	327.019	38.7869
PCHAS_0303900	13.7391	15.455	17.1272	19.7333	26.6056	5.07739	2.52164	6.4856
PCHAS_0304000	1.39307	0.846113	2.26217	2.64621	4.0955	3.25674	2.60311	0.988984
PCHAS_0304100	28.847	30.0309	27.6774	30.6326	29.4937	11.3095	10.4997	21.3741
PCHAS_0304200	205.644	178.67	210.875	226.229	240.018	237.023	236.582	140.937
PCHAS_0304300	4.96811	1.8938	1.07561	1.55266	5.1529	9.61392	8.55692	2.07771
PCHAS_0304400	7.61948	4.7398	1.97835	2.26469	15.7141	35.3277	18.1546	6.55149
PCHAS_0304500	83.0329	95.0082	69.5694	75.7425	86.3293	82.9873	82.1896	79.1743
PCHAS_0304600	16.4148	18.8438	6.48529	4.56903	3.05713	5.31347	9.73529	16.1784
PCHAS_0304700	1032.76	1024.05	864.976	834.293	655.527	730.659	884.964	1075.76
PCHAS_0304800	29.5216	29.157	14.9453	10.3343	10.1631	21.9166	22.5449	27.5028
PCHAS_0304900	55.7274	76.1428	40.2971	37.8666	32.9997	22.5857	28.361	49.5461
PCHAS_0305000	1.06198	0.638024	0	0.0731339	0.401034	1.60304	2.03277	1.53777
PCHAS_0305100	5.61866	2.53614	2.15135	1.43551	6.37789	23.0006	24.9434	4.80198
PCHAS_0305200	1.57481	0.535482	0.38027	0.355674	2.02439	8.83541	4.76289	0.754754
PCHAS_0305300	76.5974	77.9576	66.1695	61.9267	45.3119	42.7058	57.5694	75.4186
PCHAS_0305400	409.749	443.637	348.085	379.393	363.427	320.511	320.694	409.546
PCHAS_0305500	39.1821	37.5823	52.6625	53.2343	55.9966	11.589	12.2602	23.594
PCHAS_0305600	133.239	133.901	127.049	121.286	93.7554	67.2464	102.311	134.312
PCHAS_0305700	14.3995	11.6389	53.0694	77.7692	209.519	42.121	19.0456	11.934
PCHAS_0305800	287.567	291.861	302.783	343.744	312.803	130.365	123.551	230.54
PCHAS_0305900	60.3079	59.7213	48.9953	47.7113	35.0692	43.4033	51.8317	55.3579
PCHAS_0306000	54.746	55.0194	47.6903	39.6642	29.8144	37.9073	58.6465	52.8705
PCHAS_0306100	6.92211	3.1497	1.48431	2.8453	25.6387	24.2031	14.9089	4.74083
PCHAS_0306200	9.98133	11.6095	4.73962	2.59946	2.23831	3.56587	4.40391	8.93601
PCHAS_0306300	26.7494	30.7936	15.6461	13.81	20.5983	30.7066	28.4926	28.2981
PCHAS_0306400	71.9227	90.2323	37.5485	24.6375	42.377	107.746	96.1548	82.4134
PCHAS_0306500	67.9079	83.115	33.7427	29.09	22.6372	47.1405	58.7622	70.5926
PCHAS_0306600	253.189	191.933	697.876	931.293	933.194	380.723	181.591	152.377
PCHAS_0306700	25.3696	24.0052	18.2402	18.4323	36.2257	31.7469	19.6147	19.19
PCHAS_0306800	43.1328	44.9007	36.774	36.7642	26.3856	7.25544	14.7216	27.7006
PCHAS_0306900	0.10723	0.0247923	0	0.21824	0.269851	0.0950289	0.231708	0
PCHAS_0307000	6.09061	1.84873	25.1909	45.4329	172.896	42.695	11.2103	2.59127
PCHAS_0307100	73.7981	72.0118	82.2357	85.7775	182.447	127.172	98.2118	83.7338
PCHAS_0307200	27.4991	9.61837	118.855	206.815	798.698	365.274	93.7684	19.6727
PCHAS_0307300	23.0558	15.3315	57.7637	89.6829	331.133	131.247	35.2903	15.2743
PCHAS_0307400	56.2516	50.214	78.991	86.6508	64.6902	18.9781	10.32	25.5683
PCHAS_0307500	64.3704	63.5145	48.3254	39.4685	64.5993	103.71	93.6466	67.0516
PCHAS_0307600	14.477	16.1039	8.39156	7.51547	6.70279	8.80911	12.8719	13.1462
PCHAS_0307700	10.2657	12.7332	5.8413	4.54736	3.75741	4.26974	3.79289	8.24655
PCHAS_0307800	125.514	141.579	76.8686	68.0822	50.9842	70.1586	92.7153	126.339
PCHAS_0307900	20.3881	25.5089	34.2961	37.785	50.5262	22.503	8.98622	13.7062
PCHAS_0308000	120.818	125.867	104.836	88.6685	58.3213	60.3539	78.4635	104.113
PCHAS_0308100	65.3394	76.5211	51.091	54.3167	36.5804	36.3712	38.0393	54.4133
PCHAS_0308200	3.234	1.36515	0.495095	0.487686	2.98314	5.34403	6.17213	1.68071
PCHAS_0308300	0.63516	0.0997785	0.0960651	0.0530651	0.770833	1.23637	1.45024	0.196656
PCHAS_0308400	109.065	122.092	69.1372	57.7329	37.891	52.8959	96.5399	121.999
PCHAS_0308500	153.181	162.349	126.444	98.9728	67.4267	90.0598	123.789	164.226
PCHAS_0308600	81.799	88.6849	54.2942	48.0109	37.6608	26.0044	36.6409	72.9323
PCHAS_0308700	102.595	115.473	71.1364	49.6595	29.2374	24.4708	41.543	91.129
PCHAS_0308800	0.62964	0.859351	0.105055	0.271111	0.329135	0.206148	0.462458	0.587841
PCHAS_0308900	1.21222	0.510024	4.40603	7.27075	32.1855	8.13895	3.44197	0.569217
PCHAS_0309000	465.654	515.444	368.566	332.61	270.81	349.671	386.939	461.775
PCHAS_0309100	1066.96	983.177	1248.44	1503.81	1582.64	950.412	997.866	898.487
PCHAS_0309200	2440.65	2472.24	2434.26	2352.68	1731.71	2461.2	2757.92	2871.54
PCHAS_0309300	15.4675	10.3082	35.2674	52.1195	73.8794	23.5369	12.8995	6.06322
PCHAS_0309400	58.0539	57.0121	63.6436	75.6905	68.2701	28.8213	25.1087	38.9626
PCHAS_0309500	279.493	320.072	308.018	256.157	150.631	113.391	87.9595	244.935
PCHAS_0309600	11.7664	12.708	5.67905	4.56874	2.99749	5.88784	8.7281	11.7766
PCHAS_0309700	1.43337	0.504296	0.834968	1.42179	44.5526	20.1711	5.67979	0.816211
PCHAS_0309800	15.4739	19.6983	7.49134	7.13802	19.8575	24.5238	27.2227	16.7576
PCHAS_0309900	2.61478	5.4247	1.75183	0.876408	1.50209	4.02565	4.14521	4.27582
PCHAS_0310000	454.465	399.172	434.738	442.094	564.815	486.224	488.104	416.308
PCHAS_0310100	6.02763	6.04502	3.58138	2.89181	4.38482	4.20935	3.82342	4.23408
PCHAS_0310200	77.6395	75.9712	109.453	131.932	135.742	35.4878	36.8327	66.9011
PCHAS_0310300	85.6327	100.748	88.0966	88.4718	61.5383	32.3503	44.6774	79.2794
PCHAS_0310400	0.604802	0.243166	0.716128	0.657491	0.164977	2.61306	1.16701	0
PCHAS_0310500	10.8664	8.5589	14.4462	18.8613	13.9807	6.26336	3.98805	4.29571
PCHAS_0310600	16.349	14.1291	16.4783	17.2529	12.9419	6.32047	3.49903	7.71219
PCHAS_0310700	59.9402	64.4228	53.4422	52.4507	33.801	17.5105	26.5238	52.4497
PCHAS_0310800	264.196	268.955	226.045	195.081	103.029	123.789	144.162	230.405
PCHAS_0310900	40.0311	32.3442	24.8937	26.6967	24.1954	41.2657	45.8326	35.0812
PCHAS_0311000	14.0311	15.1049	16.491	20.0084	26.4318	4.81467	5.92308	12.2681
PCHAS_0311100	19.4028	15.5176	28.968	33.1685	36.7813	7.10048	3.94899	6.80726
PCHAS_0311200	171.732	189.309	170.331	168.637	114.789	65.4555	62.5279	138.076
PCHAS_0311300	277.552	277.018	262.064	239.963	205.534	207.553	253.481	274.882
PCHAS_0311400	12.073	12.357	11.5368	13.6193	16.4682	11.1043	11.7068	11.9893
PCHAS_0311500	21.3883	19.7186	21.5907	27.9391	37.0401	21.1399	21.4003	19.3735
PCHAS_0311600	3.09532	1.34583	1.93885	3.0364	97.5646	103.841	23.4651	1.95366
PCHAS_0311700	36.0891	37.9275	35.0776	33.5356	28.9179	10.8479	9.76138	22.768
PCHAS_0311800	42.215	46.7583	48.2016	49.2057	32.1381	19.3452	16.7379	34.7434
PCHAS_0311900	134.185	150.399	89.5176	68.549	57.2504	122.127	138.119	133.618
PCHAS_0312000	77.9823	96.8618	51.7359	44.9201	39.5751	12.9947	35.4044	70.7192
PCHAS_0312100	286.573	287.019	263.159	223.37	161.477	184.924	246.901	311.678
PCHAS_0312200	101.209	122.946	78.919	71.0923	48.0371	37.1781	58.1573	107.741
PCHAS_0312300	160.545	165.44	143.993	112.661	49.8068	63.206	96.712	167.408
PCHAS_0312400	21.9966	27.2484	13.3105	12.2734	11.6805	12.1669	13.7504	17.8131
PCHAS_0312500	24.8308	33.2849	15.7564	15.568	10.4821	6.19223	13.4922	32.3827
PCHAS_0312600	1.42644	0.759745	0.372036	0.367687	1.6608	3.67333	2.80751	0.984273
PCHAS_0312700	133.092	152.142	84.7415	93.4904	104.146	180.381	150.462	158.423
PCHAS_0312800	10.5609	2.70808	2.05435	2.17207	9.90069	31.0323	36.6939	4.67931
PCHAS_0312900	127.989	126.147	95.0021	80.0208	75.9999	119.379	133.848	128.375
PCHAS_0313000	266.378	290.709	192.853	160.518	102.325	127.189	138.432	250.312
PCHAS_0313100	227.431	225.319	222.273	213.677	211.153	171.744	176.997	200.598
PCHAS_0313200	411.911	441.001	367.906	310.52	192.996	128.704	155.61	418.455
PCHAS_0313300	101.048	106.356	68.731	54.0132	70.7696	109.797	108.467	103.643
PCHAS_0313400	10.756	11.631	10.0132	9.96574	8.80489	7.32463	7.48036	8.65845
PCHAS_0313500	1.29	0.281715	0.43039	0.757098	13.5297	12.3192	5.9748	0.688253
PCHAS_0313600	8.14074	2.16103	1.08187	2.28776	68.3974	66.4555	27.8812	5.21039
PCHAS_0313700	73.2822	94.2088	51.0123	48.4352	70.692	96.7309	92.0098	88.9487
PCHAS_0313800	2.42406	1.29573	2.11678	5.54932	65.5891	47.6858	10.2423	1.95581
PCHAS_0313900	258.778	245.867	280.292	272.934	165.245	120.628	106.181	165.024
PCHAS_0314000	137.444	128.051	116.793	137.172	184.244	137.609	156.475	145.04
PCHAS_0314100	16.6436	4.379	4.15039	4.1272	18.2596	90.1621	78.8135	9.85927
PCHAS_0314200	77.6323	80.6909	72.7204	82.4163	63.8581	31.2787	44.2145	65.0284
PCHAS_0314300	51.3771	52.1367	50.161	54.1094	42.9667	34.7049	32.4916	40.4314
PCHAS_0314400	58.7653	51.6279	52.6032	57.4098	49.7738	43.0814	53.7326	49.4142
PCHAS_0314500	125.5	116.169	106.259	96.7493	71.7217	91.4523	106.518	112.739
PCHAS_0314600	7.85409	3.67792	24.1052	40.7536	111.554	31.3054	16.3577	3.63714
PCHAS_0314700	2.9717	1.26582	8.15912	11.3626	51.1717	26.5148	6.53156	2.97966
PCHAS_0314800	39.1324	7.34456	4.74127	4.70119	30.0081	113.413	121.275	15.0263
PCHAS_0314900	20.4901	23.5271	10.3627	8.63328	6.4441	3.34283	9.99318	16.4723
PCHAS_0315000	56.0333	58.6204	37.1171	35.2169	29.1943	40.1256	44.9615	50.6574
PCHAS_0315100	13.4049	14.3471	7.28017	5.647	5.53129	8.56693	15.3533	12.8018
PCHAS_0315200	26.2116	36.146	20.1941	19.236	23.7416	19.8137	18.5243	25.3463
PCHAS_0315300	0.355347	0.358171	0.135744	0.334352	0.429162	0.267936	0.632153	0.279729
PCHAS_0315400	99.2665	92.2484	160.618	181.319	227.834	87.3215	63.4974	76.5082
PCHAS_0315500	1.94494	1.22601	1.09514	1.29379	40.4206	36.4347	8.21949	2.17
PCHAS_0315600	0.694111	0.168571	2.03703	2.17715	10.6831	2.21063	1.7648	0.280543
PCHAS_0315700	2.9346	0.631753	0.696724	1.09891	4.7978	3.22623	5.02167	0.717329
PCHAS_0315800	2.44549	1.0347	1.46717	1.65702	3.54466	3.38325	4.27836	1.27128
PCHAS_0315900	257.528	242.685	346.877	402.657	403.289	132.087	63.56	149.16
PCHAS_0316000	6.01064	6.33076	1.73897	0.911948	1.34128	2.81528	3.31446	4.82287
PCHAS_0316100	43.1146	57.0794	31.722	26.9321	65.5427	83.9973	59.216	44.0613
PCHAS_0316200	165.012	182.692	131.074	114.818	93.8563	105.432	144.411	161.037
PCHAS_0316300	42.2989	22.7805	128.614	171.771	232.31	103.56	45.1699	15.8939
PCHAS_0316400	12.7626	12.1463	9.58767	12.0394	16.7155	8.94828	9.31616	10.9361
PCHAS_0316500	156.417	145.788	125.616	121.289	77.3692	133.64	144.782	165.571
PCHAS_0316600	2356.58	2369.91	2061.73	1982.51	1353.57	1900.4	2182.68	2615.88
PCHAS_0316700	37.7756	42.9783	24.9767	24.8917	59.7622	77.5499	58.5323	39.0433
PCHAS_0316800	153.065	124.329	324.61	392.436	356.267	111.559	48.8031	60.0823
PCHAS_0316900	26.1711	8.1445	6.80444	6.86486	19.6774	68.4475	70.1239	12.1246
PCHAS_0317000	2.17141	1.80666	0.808534	0.981787	2.68388	5.01529	3.61038	1.05921
PCHAS_0317100	42.8801	57.9123	16.5695	11.6719	14.9581	32.2024	38.6373	54.452
PCHAS_0317200	70.8586	76.6245	55.5244	48.7935	73.4957	120.425	89.3837	80.3823
PCHAS_0317300	607.971	589.316	685.769	629.244	467.864	423.188	455.603	545.796
PCHAS_0317400	53.5791	58.8613	30.81	29.8144	37.5751	49.1386	50.8077	53.3426
PCHAS_0317500	107.416	108.96	83.3211	97.2427	141.609	139.499	133.211	116.327
PCHAS_0317520	166.8	154.765	119.028	101.647	143.11	177.593	179.116	152.882
PCHAS_0317530	2.68297	3.51504	5.23017	3.03207	6.84724	3.35377	11.0492	0.969981
PCHAS_0317540	22.1882	32.9806	21.5213	21.9936	20.3798	26.0063	30.3699	25.4201
PCHAS_0317600	41.8271	12.4736	7.09485	6.37077	32.7437	143.45	147.161	20.6713
PCHAS_0317700	3546.25	3538.41	3510.42	3257.04	2228.8	2979.75	3610.71	3966.84
PCHAS_0317800	3.9645	8.79351	7.3647	7.95555	21.1349	13.0467	9.30693	4.71019
PCHAS_0317900	1036.62	1057.61	911.519	982.729	1750.11	2835.68	2167.88	1381.76
PCHAS_0318000	70.7701	85.3869	44.486	33.8077	21.7614	14.1743	35.6616	66.0392
PCHAS_0318100	51.4433	35.7345	106.683	140.874	196.009	51.4118	22.2046	17.9904
PCHAS_0318200	214.87	296.547	119.729	127.583	323.991	345.88	229.436	231.461
PCHAS_0318300	279.02	249.979	151.254	125.57	359.668	814.395	657.854	370.303
PCHAS_0318400	8.21306	3.70634	41.2928	73.4987	272.576	62.0277	15.7821	5.71499
PCHAS_0318500	1.68997	1.54738	6.07246	7.61987	7.81679	0.740517	0.290744	0.212046
PCHAS_0318600	1.03632	0.263946	0.177355	0.677603	16.6779	17.3449	4.00291	0.669207
PCHAS_0318700	0.500446	0.160849	0.784945	2.12101	11.9287	2.55785	0.676057	0.218746
PCHAS_0318800	3.82469	4.53351	6.42478	4.55633	7.64923	1.82698	3.67214	5.69191
PCHAS_0318900	40.3458	40.0539	18.4313	15.2369	49.3565	117.703	81.2648	49.4136
PCHAS_0319000	2.23552	2.73574	1.31395	0.629968	1.50819	3.60041	3.15501	2.36489
PCHAS_0319100	0.589717	0.412847	1.02067	1.96644	1.94873	0.187986	0.0680486	0.757781
PCHAS_0319200	19.9395	14.972	12.6476	10.3303	22.5714	84.8138	32.0096	17.1341
PCHAS_0319300	7.77431	5.89479	3.34464	2.15796	49.7388	165.258	56.3244	9.71205
PCHAS_0319400	0.620246	0.547926	0.333868	0.761162	1.28303	0.390806	0.599491	0.603421
PCHAS_0319500	1.37598	2.0265	0.408818	1.52217	10.1551	2.38563	1.9421	3.43482
PCHAS_0319600	1.13783	0.392074	1.38267	2.29366	45.8385	15.4438	2.16456	1.53194
[truncated: 4,849 more rows]

## Sheet: chab_TPM_ChaplAapl
Geneid	time	chapl_aapl	sample	tpm
[truncated: 1,120 more rows]

[truncated: 1 more sheets: chab_zscore]
