# Supplementary material for: Analysis of pir gene expression across the Plasmodium life cycle
Source: Malar J. 2021 Nov 25;20:445. doi: 10.1186/s12936-021-03979-6 (PMC8614022; doi:10.1186/s12936-021-03979-6)
Supplement: Supplementary file 14 — Additional file 14. Table of contents of additional files 1–6. [file 12936_2021_3979_MOESM14_ESM.xlsx]

## Sheet: Sheet1
P.berghei
Separate files	Sheet	Sheet name	What is it?
File 1	-	-	Counts
File 2	1	pir_gene_info	Pir gene information used (gene IDs, subfamilies etc)
File 2	2	berg_TPM_allExpts_bioReps	TPM of every replicate from every experiment
File 2	3	berg_TPM_allExpts_avg	Average TPM across life cycle stages, experiments still separate
File 2	4	berg_TPM_ExptsCombined	Average TPM across life cycle stages and experiments
File 2	5	berg_TPM_Comb_SorLeachGene	Average TPM for each gene for each life stage, sorted by Short or Long-form designation
File 2	6	berg_TPM_Comb_SubfamSums	Sum of pir TPM for each subfamily for each life stage
File 2	7	berg_TPM_Comb_ChromSums	Sum of the TPM of every pir on each chromosome, separated by life stage
File 2	8	berg_TPM_Comb_LociSums	Sum of the TPM of every pir on each locus, separated by life stage
File 3	-	-	Qusage analysis table statistically comparing groups of pirs or the pirs themselves between Asex.Mixed, Gametocytes.Male and Liver.Merozoites.
File 4	-	-	DESeq analysis table statistically comparing individual genes between stages of interest.
P.chabaudi
Separate files	Sheet	Sheet name	What is it?
File 5	-	-	Counts
File 6	1	Parasitaemia d7	Paraitaemia counts by light microscopy analysis of Giemsa stained slides
File 6	2	pir_gene_info	Pir gene information used (gene IDs, subfamilies etc)
File 6	3	chab_TPM_bioreps	TPM of every replicate from every transmission method
File 6	4	chab_TPM_avg	Average TPM across timepoints for RMT
File 6	5	chab_TPM_ChaplAapl	TPM of each gene in each sample grouped by AAPL and ChAPL locus
File 6	6	chab_zscore	z-scores of all genes calculated across the RMT timepoints
